# Supplementary material for: Increased circulating resistin levels in early-onset breast cancer patients of normal body mass index correlate with lymph node negative involvement and longer disease free survival: a multi-center POSH cohort serum proteomics study
Source: Springer Nature journal article supplement (doi:10.1186/s13058-018-0938-6), 2018-03-22
Supplement: MOESM3 [file 15557162]

## Supplementary Section 3. Analysed proteins

| Accession | Description                                                                                                                 | $\Sigma$ Coverage | $\Sigma\#$<br>Proteins | $\Sigma\#$<br>Unique<br>Peptides | $\Sigma\#$<br>Peptides | $\Sigma\#$<br>PSMs | 117/1<br>19 | 118/<br>119 | 117/1<br>21 | 118/1<br>21 | 114/1<br>16 | 114/<br>115 | 113/<br>116 | 113/1<br>15 | # AAs | MW<br>[kDa] | calc.<br>pI |
|-----------|-----------------------------------------------------------------------------------------------------------------------------|-------------------|------------------------|----------------------------------|------------------------|--------------------|-------------|-------------|-------------|-------------|-------------|-------------|-------------|-------------|-------|-------------|-------------|
| Q8NDY3    | [Protein ADP-ribosylarginine] hydrolase-like protein 1 OS=Homo sapiens GN=ADPRHL1 PE=2 SV=1 - [ARHL1_HUMAN]                 | 2.26              | 1                      | 1                                | 1                      | 1                  | 1.20        | 1.29        | 1.30        | 1.42        |             |             |             |             | 354   | 40.1        | 5.85        |
| Q96QU6    | 1-aminocyclopropane-1-carboxylate synthase-like protein 1 OS=Homo sapiens GN=ACCS PE=2 SV=1 - [1A1L1_HUMAN]                 | 2.99              | 1                      | 1                                | 1                      | 1                  | 1.13        | 1.25        | 1.05        | 1.17        |             |             |             |             | 501   | 57.3        | 6.43        |
| Q9Y2I7    | 1-phosphatidylinositol 3-phosphate 5-kinase OS=Homo sapiens GN=PIKFYVE PE=1 SV=3 - [FYV1_HUMAN]                             | 1.62              | 9                      | 1                                | 3                      | 4                  |             |             |             |             | 0.83        | 0.84        | 0.66        | 0.67        | 2098  | 237.0       | 6.70        |
| Q01970    | 1-phosphatidylinositol 4,5-bisphosphate phosphodiesterase beta-3 OS=Homo sapiens GN=PLCB3 PE=1 SV=2 - [PLCB3_HUMAN]         | 3.16              | 2                      | 2                                | 3                      | 5                  | 0.37        | 0.34        | 0.43        | 0.40        | 0.90        | 0.94        | 0.87        | 0.92        | 1234  | 138.7       | 5.90        |
| Q15147    | 1-phosphatidylinositol 4,5-bisphosphate phosphodiesterase beta-4 OS=Homo sapiens GN=PLCB4 PE=1 SV=3 - [PLCB4_HUMAN]         | 2.21              | 1                      | 2                                | 3                      | 3                  | 0.92        | 0.92        | 0.94        | 0.94        | 0.79        | 0.92        | 0.85        | 1.00        | 1175  | 134.4       | 6.90        |
| P51178    | 1-phosphatidylinositol 4,5-bisphosphate phosphodiesterase delta-1 OS=Homo sapiens GN=PLCD1 PE=1 SV=2 - [PLCD1_HUMAN]        | 8.20              | 1                      | 3                                | 3                      | 4                  | 1.17        | 1.16        | 1.16        | 1.15        |             |             |             |             | 756   | 85.6        | 6.70        |
| Q8N3E9    | 1-phosphatidylinositol 4,5-bisphosphate phosphodiesterase delta-3 OS=Homo sapiens GN=PLCD3 PE=1 SV=3 - [PLCD3_HUMAN]        | 3.68              | 1                      | 1                                | 1                      | 1                  |             |             |             |             | 1.28        | 1.28        | 0.97        | 0.97        | 789   | 89.2        | 6.98        |
| Q07973    | 1,25-dihydroxyvitamin D(3) 24-hydroxylase, mitochondrial OS=Homo sapiens GN=CYP24A1 PE=1 SV=2 - [CP24A_HUMAN]               | 5.84              | 1                      | 1                                | 1                      | 1                  |             |             |             |             | 1.66        | 1.62        | 1.08        | 1.06        | 514   | 58.8        | 8.75        |
| P31946    | 14-3-3 protein beta/alpha OS=Homo sapiens GN=YWHAB PE=1 SV=3 - [1433B_HUMAN]                                                | 12.60             | 6                      | 1                                | 3                      | 13                 | 0.59        | 0.08        | 0.69        | 0.09        |             |             |             |             | 246   | 28.1        | 4.83        |
| P63104    | 14-3-3 protein zeta/delta OS=Homo sapiens GN=YWHAZ PE=1 SV=1 - [1433Z_HUMAN]                                                | 35.92             | 6                      | 5                                | 8                      | 33                 | 0.57        | 0.58        | 0.62        | 0.63        | 0.83        | 0.79        | 0.86        | 0.82        | 245   | 27.7        | 4.79        |
| Q9BPX1    | 17-beta-hydroxysteroid dehydrogenase 14 OS=Homo sapiens GN=HSD17B14 PE=1 SV=1 - [DHB14_HUMAN]                               | 9.26              | 1                      | 1                                | 1                      | 4                  | 0.91        | 0.85        | 0.89        | 0.84        | 0.86        | 0.88        | 0.94        | 0.96        | 270   | 28.3        | 6.06        |
| Q9C0C2    | 182 kDa tankyrase-1-binding protein OS=Homo sapiens GN=TNKS1BP1 PE=1 SV=4 - [TB182_HUMAN]                                   | 4.22              | 1                      | 3                                | 3                      | 4                  | 0.91        | 0.61        | 0.85        | 0.60        | 0.56        | 0.57        | 0.57        | 0.58        | 1729  | 181.7       | 4.86        |
| O75600    | 2-amino-3-ketobutyrate coenzyme A ligase, mitochondrial OS=Homo sapiens GN=GCAAT PE=2 SV=1 - [KBL_HUMAN]                    | 6.21              | 1                      | 1                                | 1                      | 6                  | 1.24        | 1.25        | 1.33        | 1.36        | 1.56        | 1.64        | 1.40        | 1.49        | 419   | 45.3        | 8.05        |
| Q96SZ5    | 2-aminoethanethiol dioxygenase OS=Homo sapiens GN=ADO PE=1 SV=2 - [AEDO_HUMAN]                                              | 7.41              | 1                      | 1                                | 1                      | 1                  |             |             |             |             | 0.98        | 1.18        | 0.96        | 1.16        | 270   | 29.7        | 6.04        |
| Q9UJ83    | 2-hydroxyacyl-CoA lyase 1 OS=Homo sapiens GN=HACL1 PE=1 SV=2 - [HACL1_HUMAN]                                                | 7.09              | 1                      | 2                                | 2                      | 8                  | 1.01        | 1.15        | 1.09        | 1.24        | 0.96        | 0.93        | 1.06        | 1.03        | 578   | 63.7        | 7.36        |
| Q8N543    | 2-oxoglutarate and iron-dependent oxygenase domain-containing protein 1 OS=Homo sapiens GN=OGFOD1 PE=1 SV=1 - [OGFD1_HUMAN] | 4.06              | 1                      | 1                                | 1                      | 1                  | 1.34        | 1.63        | 1.19        | 1.44        |             |             |             |             | 542   | 63.2        | 5.11        |
| P21953    | 2-oxoisovalerate dehydrogenase subunit beta, mitochondrial OS=Homo sapiens GN=BCKDHB PE=1 SV=2 - [ODBB_HUMAN]               | 4.34              | 1                      | 1                                | 1                      | 1                  |             |             |             |             |             | 0.67        | 0.74        |             | 392   | 43.1        | 6.29        |
| Q9NYL5    | 24-hydroxycholesterol 7-alpha-hydroxylase OS=Homo sapiens GN=CYP39A1 PE=2 SV=2 - [CP39A_HUMAN]                              | 5.33              | 2                      | 1                                | 2                      | 2                  |             |             |             |             | 0.80        | 1.02        | 0.87        | 1.11        | 469   | 54.1        | 8.65        |
| P62333    | 26S protease regulatory subunit 10B OS=Homo sapiens GN=PSMC6 PE=1 SV=1 - [PR10_HUMAN]                                       | 5.40              | 1                      | 1                                | 1                      | 2                  | 0.92        | 1.16        | 0.83        | 1.05        |             |             |             |             | 389   | 44.1        | 7.49        |
| Q99460    | 26S proteasome non-ATPase regulatory subunit 1 OS=Homo sapiens GN=PSMD1 PE=1 SV=2 - [PSMD1_HUMAN]                           | 1.26              | 1                      | 1                                | 1                      | 1                  | 1.17        | 1.16        | 1.25        | 1.25        |             |             |             |             | 953   | 105.8       | 5.39        |
| O00231    | 26S proteasome non-ATPase regulatory subunit 11 OS=Homo sapiens GN=PSMD11 PE=1 SV=3 - [PSD11_HUMAN]                         | 2.61              | 1                      | 1                                | 1                      | 1                  |             |             |             |             | 0.95        | 0.81        | 1.12        | 0.95        | 422   | 47.4        | 6.48        |
| Q9UNM6    | 26S proteasome non-ATPase regulatory subunit 13 OS=Homo sapiens GN=PSMD13 PE=1 SV=2 - [PSD13_HUMAN]                         | 3.72              | 1                      | 1                                | 1                      | 1                  | 0.89        | 0.96        | 0.79        | 0.84        |             |             |             |             | 376   | 42.9        | 5.81        |
| Q13200    | 26S proteasome non-ATPase regulatory subunit 2 OS=Homo sapiens GN=PSMD2 PE=1 SV=3 - [PSMD2_HUMAN]                           | 2.75              | 1                      | 1                                | 1                      | 1                  | 1.21        | 1.09        | 1.19        | 1.09        |             |             |             |             | 908   | 100.1       | 5.20        |
| P55036    | 26S proteasome non-ATPase regulatory subunit 4 OS=Homo sapiens GN=PSMD4 PE=1 SV=1 - [PSMD4_HUMAN]                           | 6.63              | 1                      | 1                                | 1                      | 1                  | 0.87        | 0.85        | 1.00        | 0.99        |             |             |             |             | 377   | 40.7        | 4.79        |
| Q15008    | 26S proteasome non-ATPase regulatory subunit 6 OS=Homo sapiens GN=PSMD6 PE=1 SV=1 - [PSMD6_HUMAN]                           | 2.31              | 1                      | 1                                | 1                      | 2                  | 0.72        | 0.78        | 0.71        | 0.77        |             |             |             |             | 389   | 45.5        | 5.62        |

|        |                                                                                                               |       |   |   |   |    |      |      |      |      |      |      |      |      |      |       |       |     |      |      |
|--------|---------------------------------------------------------------------------------------------------------------|-------|---|---|---|----|------|------|------|------|------|------|------|------|------|-------|-------|-----|------|------|
| P48556 | 26S proteasome non-ATPase regulatory subunit 8 OS=Homo sapiens GN=PSMD8 PE=1 SV=2 - [PSMD8_HUMAN]             | 10.29 | 1 | 1 | 1 | 1  | 0.97 | 0.67 | 1.37 | 0.96 |      |      |      |      |      |       |       | 350 | 39.6 | 9.70 |
| Q9Y2Q9 | 28S ribosomal protein S28, mitochondrial OS=Homo sapiens GN=MRPS28 PE=1 SV=1 - [RT28_HUMAN]                   | 6.95  | 1 | 1 | 1 | 1  | 1.20 | 1.26 | 1.17 | 1.24 |      |      |      |      |      |       |       | 187 | 20.8 | 9.10 |
| P82675 | 28S ribosomal protein S5, mitochondrial OS=Homo sapiens GN=MRPS5 PE=1 SV=2 - [RT05_HUMAN]                     | 2.56  | 1 | 1 | 1 | 1  |      |      |      |      | 0.73 | 1.00 | 0.67 | 0.92 | 430  | 48.0  | 9.92  |     |      |      |
| P04035 | 3-hydroxy-3-methylglutaryl-coenzyme A reductase OS=Homo sapiens GN=HMGCR PE=1 SV=1 - [HMDH_HUMAN]             | 1.35  | 1 | 1 | 1 | 1  | 0.41 | 0.51 | 0.44 | 0.55 |      |      |      |      | 888  | 97.4  | 6.74  |     |      |      |
| Q6NVY1 | 3-hydroxyisobutyryl-CoA hydrolase, mitochondrial OS=Homo sapiens GN=HIBCH PE=1 SV=2 - [HIBCH_HUMAN]           | 3.11  | 1 | 1 | 1 | 1  | 1.40 | 1.31 | 1.40 | 1.33 |      |      |      |      | 386  | 43.5  | 8.19  |     |      |      |
| P42765 | 3-ketoacyl-CoA thiolase, mitochondrial OS=Homo sapiens GN=ACAA2 PE=1 SV=2 - [THIM_HUMAN]                      | 1.76  | 1 | 1 | 1 | 1  |      |      |      |      | 1.16 | 1.35 | 1.01 | 1.17 | 397  | 41.9  | 8.09  |     |      |      |
| P09110 | 3-ketoacyl-CoA thiolase, peroxisomal OS=Homo sapiens GN=ACAA1 PE=1 SV=2 - [THIK_HUMAN]                        | 2.59  | 1 | 1 | 1 | 1  |      |      |      |      | 0.89 | 0.89 | 1.08 | 1.07 | 424  | 44.3  | 8.44  |     |      |      |
| Q7Z7H8 | 39S ribosomal protein L10, mitochondrial OS=Homo sapiens GN=MRPL10 PE=1 SV=3 - [RM10_HUMAN]                   | 8.05  | 1 | 1 | 1 | 1  | 1.14 | 1.04 | 1.23 | 1.12 |      |      |      |      | 261  | 29.3  | 9.58  |     |      |      |
| Q9H2W6 | 39S ribosomal protein L46, mitochondrial OS=Homo sapiens GN=MRPL46 PE=1 SV=1 - [RM46_HUMAN]                   | 4.30  | 1 | 1 | 1 | 1  |      |      |      |      | 1.01 | 0.44 | 0.64 | 0.28 | 279  | 31.7  | 7.05  |     |      |      |
| P49189 | 4-trimethylaminobutyraldehyde dehydrogenase OS=Homo sapiens GN=ALDH9A1 PE=1 SV=3 - [AL9A1_HUMAN]              | 2.43  | 1 | 1 | 1 | 2  | 1.00 | 0.95 | 0.93 | 0.89 |      |      |      |      | 494  | 53.8  | 5.87  |     |      |      |
| P63220 | 40S ribosomal protein S21 OS=Homo sapiens GN=RPS21 PE=1 SV=1 - [RS21_HUMAN]                                   | 21.69 | 1 | 1 | 1 | 1  |      |      |      |      | 1.19 | 1.12 | 1.06 | 1.00 | 83   | 9.1   | 8.50  |     |      |      |
| P61247 | 40S ribosomal protein S3a OS=Homo sapiens GN=RPS3A PE=1 SV=2 - [RS3A_HUMAN]                                   | 4.55  | 1 | 1 | 1 | 3  |      |      |      |      | 0.27 | 0.34 | 0.86 | 0.69 | 264  | 29.9  | 9.73  |     |      |      |
| P62081 | 40S ribosomal protein S7 OS=Homo sapiens GN=RPS7 PE=1 SV=1 - [RS7_HUMAN]                                      | 7.73  | 1 | 1 | 1 | 1  | 0.96 | 0.69 | 0.72 | 0.52 |      |      |      |      | 194  | 22.1  | 10.10 |     |      |      |
| Q13702 | 43 kDa receptor-associated protein of the synapse OS=Homo sapiens GN=RAPSN PE=1 SV=4 - [RAPSN_HUMAN]          | 10.44 | 1 | 2 | 2 | 4  | 0.20 | 0.15 | 0.36 | 0.27 | 0.73 | 1.19 | 0.74 | 1.21 | 412  | 46.3  | 8.12  |     |      |      |
| P08195 | 4F2 cell-surface antigen heavy chain OS=Homo sapiens GN=SLC3A2 PE=1 SV=3 - [4F2_HUMAN]                        | 15.56 | 1 | 7 | 8 | 12 | 1.14 | 1.04 | 1.23 | 1.10 | 0.95 | 1.04 | 0.88 | 0.97 | 630  | 68.0  | 5.01  |     |      |      |
| P13196 | 5-aminolevulinatase synthase, nonspecific, mitochondrial OS=Homo sapiens GN=ALAS1 PE=1 SV=2 - [HEM1_HUMAN]    | 2.34  | 1 | 1 | 1 | 2  |      |      |      |      | 1.59 | 1.87 | 1.58 | 1.86 | 640  | 70.5  | 8.46  |     |      |      |
| P49914 | 5-formyltetrahydrofolate cyclo-ligase OS=Homo sapiens GN=MTHFS PE=1 SV=2 - [MTHFS_HUMAN]                      | 9.36  | 1 | 1 | 1 | 1  | 0.98 | 0.95 | 1.09 | 1.07 |      |      |      |      | 203  | 23.2  | 7.88  |     |      |      |
| P41595 | 5-hydroxytryptamine receptor 2B OS=Homo sapiens GN=HTR2B PE=1 SV=1 - [5HT2B_HUMAN]                            | 1.66  | 1 | 1 | 1 | 1  |      |      |      |      | 0.95 | 0.63 | 1.06 | 0.70 | 481  | 54.3  | 9.10  |     |      |      |
| P28335 | 5-hydroxytryptamine receptor 2C OS=Homo sapiens GN=HTR2C PE=1 SV=1 - [5HT2C_HUMAN]                            | 6.11  | 1 | 1 | 1 | 1  | 0.86 | 0.14 | 0.53 | 0.09 |      |      |      |      | 458  | 51.8  | 8.91  |     |      |      |
| P46098 | 5-hydroxytryptamine receptor 3A OS=Homo sapiens GN=HTR3A PE=1 SV=1 - [5HT3A_HUMAN]                            | 2.93  | 1 | 1 | 1 | 1  |      |      |      |      | 1.58 | 1.38 | 1.41 | 1.22 | 478  | 55.2  | 7.39  |     |      |      |
| O14841 | 5-oxoprolinase OS=Homo sapiens GN=OPLAH PE=1 SV=3 - [OPLA_HUMAN]                                              | 3.03  | 2 | 2 | 3 | 6  |      |      |      |      | 1.50 | 1.79 | 0.91 | 1.08 | 1288 | 137.4 | 6.58  |     |      |      |
| P17643 | 5,6-dihydroxyindole-2-carboxylic acid oxidase OS=Homo sapiens GN=TYRP1 PE=1 SV=2 - [TYRP1_HUMAN]              | 1.68  | 1 | 1 | 1 | 2  |      |      |      |      | 0.81 | 0.35 | 0.74 | 0.32 | 537  | 60.7  | 5.99  |     |      |      |
| Q9H816 | 5' exonuclease Apollo OS=Homo sapiens GN=DCLRE1B PE=1 SV=1 - [DCR1B_HUMAN]                                    | 3.57  | 1 | 1 | 1 | 1  | 2.95 | 1.89 | 1.22 | 0.79 |      |      |      |      | 532  | 60.0  | 8.41  |     |      |      |
| Q13131 | 5'-AMP-activated protein kinase catalytic subunit alpha-1 OS=Homo sapiens GN=PRKAA1 PE=1 SV=4 - [AAPK1_HUMAN] | 1.79  | 1 | 1 | 1 | 5  | 1.09 | 1.17 | 0.92 | 1.00 | 0.79 | 0.93 | 0.79 | 0.93 | 559  | 64.0  | 8.12  |     |      |      |
| Q9UGJ0 | 5'-AMP-activated protein kinase subunit gamma-2 OS=Homo sapiens GN=PRKAG2 PE=1 SV=1 - [AAKG2_HUMAN]           | 2.81  | 1 | 1 | 1 | 1  | 0.62 | 0.37 | 0.45 | 0.26 |      |      |      |      | 569  | 63.0  | 9.35  |     |      |      |
| P21589 | 5'-nucleotidase OS=Homo sapiens GN=NT5E PE=1 SV=1 - [5NTD_HUMAN]                                              | 4.53  | 1 | 1 | 1 | 1  |      |      |      |      | 1.47 |      |      |      | 574  | 63.3  | 7.03  |     |      |      |
| O43422 | 52 kDa repressor of the inhibitor of the protein kinase OS=Homo sapiens GN=PRKRIR PE=2 SV=2 - [P52K_HUMAN]    | 4.47  | 1 | 2 | 2 | 2  | 0.71 | 0.60 | 0.89 | 0.73 |      |      |      |      | 761  | 87.6  | 5.86  |     |      |      |

|        |                                                                                                                         |       |   |    |    |    |      |      |      |      |      |      |      |      |      |       |       |      |      |      |       |       |
|--------|-------------------------------------------------------------------------------------------------------------------------|-------|---|----|----|----|------|------|------|------|------|------|------|------|------|-------|-------|------|------|------|-------|-------|
| Q15646 | 59 kDa 2'-5'-oligoadenylate synthase-like protein OS=Homo sapiens GN=OASL PE=1 SV=2 - [OASL_HUMAN]                      | 3.70  | 1 | 1  | 1  | 2  |      |      |      |      |      |      |      |      |      | 1.35  | 1.42  | 1.18 | 1.23 | 514  | 59.2  | 7.87  |
| Q16877 | 6-phosphofructo-2-kinase/fructose-2,6-bisphosphatase 4 OS=Homo sapiens GN=PFKFB4 PE=2 SV=6 - [F264_HUMAN]               | 1.71  | 1 | 1  | 1  | 1  | 0.92 | 1.22 | 0.77 | 1.04 |      |      |      |      |      |       |       |      |      | 469  | 54.0  | 6.62  |
| Q01813 | 6-phosphofructokinase type C OS=Homo sapiens GN=PFKP PE=1 SV=2 - [K6PP_HUMAN]                                           | 4.85  | 1 | 3  | 3  | 5  | 0.71 | 0.80 | 0.75 | 0.77 |      |      |      |      |      |       |       |      |      | 784  | 85.5  | 7.55  |
| P17858 | 6-phosphofructokinase, liver type OS=Homo sapiens GN=PFKL PE=1 SV=6 - [K6PL_HUMAN]                                      | 8.59  | 2 | 5  | 5  | 10 | 0.81 | 0.88 | 0.78 | 0.88 |      |      |      |      |      |       |       |      |      | 780  | 85.0  | 7.50  |
| P52209 | 6-phosphogluconate dehydrogenase, decarboxylating OS=Homo sapiens GN=PGD PE=1 SV=3 - [6PGD_HUMAN]                       | 22.57 | 1 | 10 | 10 | 22 | 0.91 | 0.94 | 0.99 | 1.05 | 1.02 | 1.19 | 0.86 | 1.00 |      |       |       |      |      | 483  | 53.1  | 7.23  |
| O95336 | 6-phosphogluconolactonase OS=Homo sapiens GN=PGLS PE=1 SV=2 - [6PGL_HUMAN]                                              | 8.14  | 1 | 1  | 1  | 2  |      |      |      |      |      | 0.88 | 0.52 | 0.82 | 0.48 |       |       |      |      | 258  | 27.5  | 6.05  |
| P10809 | 60 kDa heat shock protein, mitochondrial OS=Homo sapiens GN=HSPD1 PE=1 SV=2 - [CH60_HUMAN]                              | 5.93  | 1 | 2  | 2  | 4  |      |      |      |      |      | 0.60 | 0.68 | 0.66 | 0.75 |       |       |      |      | 573  | 61.0  | 5.87  |
| P05387 | 60S acidic ribosomal protein P2 OS=Homo sapiens GN=RPLP2 PE=1 SV=1 - [RLA2_HUMAN]                                       | 11.30 | 1 | 1  | 1  | 3  |      |      |      |      |      | 1.43 | 1.17 | 1.33 | 1.08 |       |       |      |      | 115  | 11.7  | 4.54  |
| Q96D46 | 60S ribosomal export protein NMD3 OS=Homo sapiens GN=NMD3 PE=1 SV=1 - [NMD3_HUMAN]                                      | 8.35  | 1 | 2  | 2  | 2  | 0.90 | 1.04 | 0.87 | 1.02 |      |      |      |      |      |       |       |      |      | 503  | 57.6  | 7.14  |
| Q96L21 | 60S ribosomal protein L10-like OS=Homo sapiens GN=RPL10L PE=1 SV=3 - [RL10L_HUMAN]                                      | 13.08 | 1 | 2  | 2  | 2  | 0.99 | 0.87 | 1.09 | 0.96 |      |      |      |      |      |       |       |      |      | 214  | 24.5  | 10.01 |
| P62910 | 60S ribosomal protein L32 OS=Homo sapiens GN=RPL32 PE=1 SV=2 - [RL32_HUMAN]                                             | 5.19  | 1 | 1  | 1  | 3  |      |      |      |      |      | 0.76 | 0.49 | 0.92 | 0.59 |       |       |      |      | 135  | 15.8  | 11.33 |
| P49207 | 60S ribosomal protein L34 OS=Homo sapiens GN=RPL34 PE=1 SV=3 - [RL34_HUMAN]                                             | 5.98  | 1 | 1  | 1  | 1  | 0.74 | 0.73 | 0.94 | 0.92 |      |      |      |      |      |       |       |      |      | 117  | 13.3  | 11.47 |
| P42766 | 60S ribosomal protein L35 OS=Homo sapiens GN=RPL35 PE=1 SV=2 - [RL35_HUMAN]                                             | 4.88  | 2 | 1  | 1  | 1  | 1.66 | 1.64 | 1.75 | 1.75 |      |      |      |      |      |       |       |      |      | 123  | 14.5  | 11.05 |
| P83881 | 60S ribosomal protein L36a OS=Homo sapiens GN=RPL36A PE=1 SV=2 - [RL36A_HUMAN]                                          | 5.66  | 2 | 1  | 1  | 2  |      |      |      |      |      | 0.82 | 1.20 | 0.37 | 0.54 |       |       |      |      | 106  | 12.4  | 10.58 |
| P46777 | 60S ribosomal protein L5 OS=Homo sapiens GN=RPL5 PE=1 SV=3 - [RL5_HUMAN]                                                | 2.02  | 1 | 1  | 1  | 2  | 1.07 | 1.34 | 0.99 | 1.26 |      |      |      |      |      |       |       |      |      | 297  | 34.3  | 9.72  |
| P62424 | 60S ribosomal protein L7a OS=Homo sapiens GN=RPL7A PE=1 SV=2 - [RL7A_HUMAN]                                             | 3.76  | 1 | 1  | 1  | 1  |      |      |      |      |      | 1.13 | 1.23 | 1.99 | 2.16 |       |       |      |      | 266  | 30.0  | 10.61 |
| P62917 | 60S ribosomal protein L8 OS=Homo sapiens GN=RPL8 PE=1 SV=2 - [RL8_HUMAN]                                                | 10.51 | 1 | 2  | 2  | 4  | 1.23 | 1.24 | 1.31 | 1.33 | 1.04 | 0.73 | 0.98 | 0.69 | 257  | 28.0  | 11.03 |      |      |      |       |       |
| Q9UNU6 | 7-alpha-hydroxycholest-4-en-3-one 12-alpha-hydroxylase OS=Homo sapiens GN=CYP8B1 PE=2 SV=2 - [CP8B1_HUMAN]              | 5.59  | 1 | 2  | 2  | 2  | 0.08 | 0.08 | 0.06 | 0.06 | 0.85 | 0.79 | 0.96 | 0.89 | 501  | 58.0  | 8.66  |      |      |      |       |       |
| P08253 | 72 kDa type IV collagenase OS=Homo sapiens GN=MMP2 PE=1 SV=2 - [MMP2_HUMAN]                                             | 9.85  | 1 | 5  | 5  | 12 | 1.08 | 0.87 | 1.06 | 0.84 | 0.87 | 1.33 | 0.78 | 1.18 | 660  | 73.8  | 5.47  |      |      |      |       |       |
| P11021 | 78 kDa glucose-regulated protein OS=Homo sapiens GN=HSPA5 PE=1 SV=2 - [GRP78_HUMAN]                                     | 36.85 | 2 | 19 | 21 | 83 | 0.95 | 0.87 | 0.96 | 0.92 | 0.75 | 0.72 | 0.78 | 0.77 | 654  | 72.3  | 5.16  |      |      |      |       |       |
| O60318 | 80 kDa MCM3-associated protein OS=Homo sapiens GN=MCM3AP PE=1 SV=2 - [MCM3A_HUMAN]                                      | 0.86  | 1 | 1  | 1  | 1  | 1.26 | 1.15 | 1.17 | 1.07 |      |      |      |      |      |       |       |      |      | 1980 | 218.3 | 6.39  |
| O60733 | 85 kDa calcium-independent phospholipase A2 OS=Homo sapiens GN=PLA2G6 PE=1 SV=2 - [PA2G6_HUMAN]                         | 0.99  | 1 | 1  | 1  | 1  |      |      |      |      |      | 0.24 | 0.63 | 0.26 | 0.68 |       |       |      |      | 806  | 89.8  | 7.27  |
| Q9H324 | A disintegrin and metalloproteinase with thrombospondin motifs 10 OS=Homo sapiens GN=ADAMTS10 PE=1 SV=2 - [ATS10_HUMAN] | 1.45  | 1 | 1  | 1  | 1  | 1.92 | 1.21 | 1.91 | 1.21 |      |      |      |      |      |       |       |      |      | 1103 | 120.8 | 7.94  |
| P58397 | A disintegrin and metalloproteinase with thrombospondin motifs 12 OS=Homo sapiens GN=ADAMTS12 PE=1 SV=2 - [ATS12_HUMAN] | 1.57  | 1 | 1  | 1  | 2  | 0.99 | 0.98 | 0.96 | 0.95 |      |      |      |      |      |       |       |      |      | 1594 | 177.6 | 7.87  |
| Q76LX8 | A disintegrin and metalloproteinase with thrombospondin motifs 13 OS=Homo sapiens GN=ADAMTS13 PE=1 SV=1 - [ATS13_HUMAN] | 19.41 | 1 | 21 | 21 | 59 | 1.20 | 1.24 | 1.13 | 1.16 | 1.22 | 1.01 | 1.18 | 1.03 | 1427 | 153.5 | 7.17  |      |      |      |       |       |
| Q8WXS8 | A disintegrin and metalloproteinase with thrombospondin motifs 14 OS=Homo sapiens GN=ADAMTS14 PE=2 SV=2 - [ATS14_HUMAN] | 0.49  | 1 | 1  | 1  | 1  | 0.90 | 0.45 | 1.25 | 0.63 |      |      |      |      |      |       |       |      |      | 1223 | 133.8 | 7.18  |
| Q8TE56 | A disintegrin and metalloproteinase with thrombospondin motifs 17 OS=Homo sapiens GN=ADAMTS17 PE=2 SV=2 - [ATS17_HUMAN] | 4.38  | 1 | 2  | 2  | 6  | 0.70 | 0.84 | 0.67 | 0.80 | 0.90 | 0.84 | 0.81 | 0.78 | 1095 | 121.0 | 8.06  |      |      |      |       |       |

|        |                                                                                                                         |       |   |   |   |    |      |      |      |      |      |       |      |      |      |       |       |
|--------|-------------------------------------------------------------------------------------------------------------------------|-------|---|---|---|----|------|------|------|------|------|-------|------|------|------|-------|-------|
| Q95450 | A disintegrin and metalloproteinase with thrombospondin motifs 2 OS=Homo sapiens GN=ADAMTS2 PE=2 SV=2 - [ATS2_HUMAN]    | 5.45  | 1 | 2 | 2 | 2  | 0.92 | 0.89 | 0.98 | 0.95 | 1211 | 134.7 | 7.15 |      |      |       |       |
| P59510 | A disintegrin and metalloproteinase with thrombospondin motifs 20 OS=Homo sapiens GN=ADAMTS20 PE=2 SV=2 - [ATS20_HUMAN] | 1.47  | 1 | 2 | 2 | 4  | 1.02 | 0.70 | 0.85 | 0.72 | 1910 | 214.6 | 7.21 |      |      |       |       |
| Q9UNA0 | A disintegrin and metalloproteinase with thrombospondin motifs 5 OS=Homo sapiens GN=ADAMTS5 PE=1 SV=2 - [ATS5_HUMAN]    | 1.08  | 1 | 1 | 1 | 1  | 0.97 | 0.95 | 1.19 | 1.16 | 930  | 101.7 | 8.85 |      |      |       |       |
| Q9UKP5 | A disintegrin and metalloproteinase with thrombospondin motifs 6 OS=Homo sapiens GN=ADAMTS6 PE=2 SV=2 - [ATS6_HUMAN]    | 5.73  | 1 | 2 | 2 | 4  | 1.57 | 2.30 | 0.88 | 1.29 | 1117 | 125.2 | 6.68 |      |      |       |       |
| Q9UKP4 | A disintegrin and metalloproteinase with thrombospondin motifs 7 OS=Homo sapiens GN=ADAMTS7 PE=1 SV=2 - [ATS7_HUMAN]    | 1.54  | 1 | 1 | 1 | 3  | 0.78 | 0.84 | 0.67 | 0.73 | 1686 | 184.0 | 6.20 |      |      |       |       |
| Q02952 | A-kinase anchor protein 12 OS=Homo sapiens GN=AKAP12 PE=1 SV=4 - [AKA12_HUMAN]                                          | 1.40  | 1 | 1 | 1 | 1  | 1.31 | 0.99 | 1.29 | 0.97 | 1782 | 191.4 | 4.41 |      |      |       |       |
| Q12802 | A-kinase anchor protein 13 OS=Homo sapiens GN=AKAP13 PE=1 SV=2 - [AKP13_HUMAN]                                          | 3.63  | 1 | 5 | 5 | 8  | 0.21 | 0.12 | 0.27 | 0.15 | 1.13 | 0.85  | 1.24 | 1.02 | 2813 | 307.4 | 5.24  |
| Q86UN6 | A-kinase anchor protein 14 OS=Homo sapiens GN=AKAP14 PE=1 SV=1 - [AKA28_HUMAN]                                          | 5.58  | 1 | 1 | 1 | 2  | 1.18 | 1.50 | 0.85 | 1.08 | 197  | 22.8  | 6.80 |      |      |       |       |
| Q13023 | A-kinase anchor protein 6 OS=Homo sapiens GN=AKAP6 PE=1 SV=3 - [AKAP6_HUMAN]                                            | 1.03  | 1 | 2 | 2 | 6  | 1.40 | 1.66 | 1.09 | 1.30 | 1.10 | 1.10  | 1.09 | 1.09 | 2319 | 256.6 | 5.01  |
| Q99996 | A-kinase anchor protein 9 OS=Homo sapiens GN=AKAP9 PE=1 SV=3 - [AKAP9_HUMAN]                                            | 1.59  | 3 | 5 | 6 | 7  | 0.97 | 1.09 | 1.07 | 1.21 | 0.99 | 0.83  | 0.72 | 0.77 | 3911 | 453.4 | 4.98  |
| Q2M3C7 | A-kinase anchor protein SPHKAP OS=Homo sapiens GN=SPHKAP PE=1 SV=1 - [SPKAP_HUMAN]                                      | 0.71  | 1 | 1 | 1 | 3  | 1.41 | 1.25 | 1.51 | 1.36 | 1.18 | 1.02  | 1.61 | 1.39 | 1700 | 186.3 | 5.14  |
| P42684 | Abelson tyrosine-protein kinase 2 OS=Homo sapiens GN=ABL2 PE=1 SV=1 - [ABL2_HUMAN]                                      | 5.33  | 1 | 2 | 2 | 3  | 0.86 | 0.80 | 0.74 | 0.68 | 1182 | 128.3 | 8.07 |      |      |       |       |
| Q96IU4 | Abhydrolase domain-containing protein 14B OS=Homo sapiens GN=ABHD14B PE=1 SV=1 - [ABHEB_HUMAN]                          | 10.00 | 1 | 2 | 2 | 3  | 0.90 | 0.94 | 0.94 | 0.93 | 210  | 22.3  | 6.40 |      |      |       |       |
| P08910 | Abhydrolase domain-containing protein 2 OS=Homo sapiens GN=ABHD2 PE=2 SV=1 - [ABHD2_HUMAN]                              | 6.35  | 1 | 1 | 2 | 4  | 0.67 | 0.17 | 0.86 | 0.22 | 425  | 48.3  | 6.70 |      |      |       |       |
| Q8WU67 | Abhydrolase domain-containing protein 3 OS=Homo sapiens GN=ABHD3 PE=2 SV=2 - [ABHD3_HUMAN]                              | 3.42  | 1 | 1 | 1 | 1  | 0.91 | 1.22 | 2.37 | 3.18 | 409  | 46.0  | 7.17 |      |      |       |       |
| Q8TB40 | Abhydrolase domain-containing protein 4 OS=Homo sapiens GN=ABHD4 PE=2 SV=1 - [ABHD4_HUMAN]                              | 8.48  | 1 | 1 | 1 | 1  | 0.45 | 0.51 | 0.61 | 0.69 | 342  | 38.8  | 7.59 |      |      |       |       |
| Q8IZT6 | Abnormal spindle-like microcephaly-associated protein OS=Homo sapiens GN=ASPM PE=1 SV=2 - [ASPM_HUMAN]                  | 0.75  | 1 | 2 | 2 | 2  | 1.09 | 1.12 | 1.11 | 1.15 | 0.88 | 0.81  | 0.87 | 0.80 | 3477 | 409.5 | 10.45 |
| Q9Y4K1 | Absent in melanoma 1 protein OS=Homo sapiens GN=AIM1 PE=1 SV=3 - [AIM1_HUMAN]                                           | 5.40  | 1 | 4 | 4 | 11 | 1.53 | 1.14 | 1.32 | 1.00 | 0.45 | 0.27  | 0.59 | 0.54 | 1723 | 188.6 | 5.86  |
| Q9BWD1 | Acetyl-CoA acetyltransferase, cytosolic OS=Homo sapiens GN=ACAT2 PE=1 SV=2 - [THIC_HUMAN]                               | 8.82  | 1 | 2 | 2 | 5  | 1.21 | 1.27 | 1.27 | 1.35 | 397  | 41.3  | 6.92 |      |      |       |       |
| Q13085 | Acetyl-CoA carboxylase 1 OS=Homo sapiens GN=ACACA PE=1 SV=2 - [ACACA_HUMAN]                                             | 1.88  | 1 | 4 | 4 | 8  | 1.06 | 0.91 | 1.04 | 0.90 | 3.97 | 3.26  | 4.00 | 3.23 | 2346 | 265.4 | 6.37  |
| O00763 | Acetyl-CoA carboxylase 2 OS=Homo sapiens GN=ACACB PE=1 SV=3 - [ACACB_HUMAN]                                             | 0.65  | 1 | 1 | 1 | 1  | 1.17 | 0.87 | 1.46 | 1.08 | 2458 | 276.4 | 6.49 |      |      |       |       |
| Q9NR19 | Acetyl-coenzyme A synthetase, cytoplasmic OS=Homo sapiens GN=ACSS2 PE=1 SV=1 - [ACSA_HUMAN]                             | 0.86  | 1 | 1 | 1 | 1  | 1.49 | 1.93 | 1.63 | 2.13 | 701  | 78.5  | 6.46 |      |      |       |       |
| Q07001 | Acetylcholine receptor subunit delta OS=Homo sapiens GN=CHRND PE=1 SV=1 - [ACHD_HUMAN]                                  | 1.93  | 1 | 1 | 1 | 1  | 0.36 | 0.48 | 0.46 | 0.61 | 517  | 58.9  | 6.55 |      |      |       |       |
| Q04844 | Acetylcholine receptor subunit epsilon OS=Homo sapiens GN=CHRNE PE=1 SV=2 - [ACHE_HUMAN]                                | 3.04  | 1 | 1 | 1 | 1  | 0.72 | 0.85 | 0.68 | 0.80 | 493  | 54.7  | 5.26 |      |      |       |       |
| Q9Y215 | Acetylcholinesterase collagenic tail peptide OS=Homo sapiens GN=COLQ PE=1 SV=2 - [COLQ_HUMAN]                           | 0.66  | 1 | 1 | 1 | 1  | 1.36 | 1.31 | 1.43 | 1.38 | 455  | 47.7  | 8.09 |      |      |       |       |
| P22303 | Acetylcholinesterase OS=Homo sapiens GN=ACHE PE=1 SV=1 - [ACES_HUMAN]                                                   | 10.26 | 1 | 2 | 2 | 3  | 0.72 | 0.87 | 1.40 | 0.95 | 614  | 67.8  | 6.29 |      |      |       |       |
| P46597 | Acetylserotonin O-methyltransferase OS=Homo sapiens GN=ASMT PE=1 SV=1 - [ASMT_HUMAN]                                    | 10.43 | 1 | 2 | 2 | 2  | 0.63 | 0.07 | 345  | 38.4 | 5.19 |       |      |      |      |       |       |

|        |                                                                                                                |       |   |   |    |     |      |      |      |      |      |       |      |      |       |      |      |
|--------|----------------------------------------------------------------------------------------------------------------|-------|---|---|----|-----|------|------|------|------|------|-------|------|------|-------|------|------|
| Q13510 | Acid ceramidase OS=Homo sapiens GN=ASAH1 PE=1 SV=5 - [ASAH1_HUMAN]                                             | 2.28  | 1 | 1 | 1  | 1   | 0.80 | 0.71 | 1.02 | 0.90 | 395  | 44.6  | 7.62 |      |       |      |      |
| Q92485 | Acid sphingomyelinase-like phosphodiesterase 3b OS=Homo sapiens GN=SMPDL3B PE=2 SV=2 - [ASM3B_HUMAN]           | 2.64  | 1 | 1 | 1  | 1   | 0.71 | 0.74 | 0.70 | 0.73 | 455  | 50.8  | 5.64 |      |       |      |      |
| Q9UHC3 | Acid-sensing ion channel 3 OS=Homo sapiens GN=ASIC3 PE=1 SV=2 - [ASIC3_HUMAN]                                  | 4.33  | 1 | 1 | 1  | 2   | 1.25 | 1.04 | 1.35 | 1.13 | 531  | 58.9  | 7.14 |      |       |      |      |
| Q96QF7 | Acidic repeat-containing protein OS=Homo sapiens GN=ACRC PE=2 SV=1 - [ACRC_HUMAN]                              | 0.72  | 1 | 1 | 1  | 2   |      |      |      | 0.74 | 0.95 | 0.72  | 0.90 | 691  | 76.1  | 4.60 |      |
| Q8NEB7 | Acrosin-binding protein OS=Homo sapiens GN=ACRBP PE=2 SV=1 - [ACRBP_HUMAN]                                     | 3.13  | 1 | 1 | 1  | 1   |      |      |      | 1.06 | 1.17 | 1.02  | 1.12 | 543  | 61.3  | 5.16 |      |
| Q8N4X5 | Actin filament-associated protein 1-like 2 OS=Homo sapiens GN=AFAP1L2 PE=1 SV=1 - [AF1L2_HUMAN]                | 3.06  | 1 | 2 | 2  | 3   | 0.95 | 0.99 | 1.04 | 1.09 | 818  | 91.2  | 5.31 |      |       |      |      |
| O14639 | Actin-binding LIM protein 1 OS=Homo sapiens GN=ABLIM1 PE=1 SV=3 - [ABLIM1_HUMAN]                               | 1.41  | 1 | 1 | 1  | 2   | 0.98 | 1.13 | 0.95 | 1.10 | 778  | 87.6  | 8.59 |      |       |      |      |
| Q9NQW6 | Actin-binding protein anillin OS=Homo sapiens GN=ANLN PE=1 SV=2 - [ANLN_HUMAN]                                 | 1.87  | 1 | 1 | 1  | 1   |      |      |      | 0.87 | 0.72 | 1.60  | 1.33 | 1124 | 124.1 | 8.07 |      |
| P61160 | Actin-related protein 2 OS=Homo sapiens GN=ACTR2 PE=1 SV=1 - [ARP2_HUMAN]                                      | 5.84  | 9 | 1 | 3  | 5   | 0.75 | 0.74 | 0.76 | 0.75 | 394  | 44.7  | 6.74 |      |       |      |      |
| O15143 | Actin-related protein 2/3 complex subunit 1B OS=Homo sapiens GN=ARPC1B PE=1 SV=3 - [ARPC1B_HUMAN]              | 6.72  | 1 | 2 | 2  | 3   | 0.71 | 0.58 | 0.70 | 0.58 | 372  | 40.9  | 8.35 |      |       |      |      |
| O15144 | Actin-related protein 2/3 complex subunit 2 OS=Homo sapiens GN=ARPC2 PE=1 SV=1 - [ARPC2_HUMAN]                 | 4.33  | 1 | 1 | 1  | 10  | 0.74 | 0.76 | 0.79 | 0.82 | 0.62 | 0.69  | 0.67 | 0.74 | 300   | 34.3 | 7.36 |
| P59998 | Actin-related protein 2/3 complex subunit 4 OS=Homo sapiens GN=ARPC4 PE=1 SV=3 - [ARPC4_HUMAN]                 | 6.55  | 1 | 1 | 1  | 2   | 0.85 | 0.94 | 0.83 | 0.92 | 168  | 19.7  | 8.43 |      |       |      |      |
| O15511 | Actin-related protein 2/3 complex subunit 5 OS=Homo sapiens GN=ARPC5 PE=1 SV=3 - [ARPC5_HUMAN]                 | 24.50 | 1 | 3 | 3  | 9   |      |      |      | 1.07 | 0.89 | 0.89  | 0.82 | 151  | 16.3  | 5.67 |      |
| P61158 | Actin-related protein 3 OS=Homo sapiens GN=ACTR3 PE=1 SV=3 - [ARP3_HUMAN]                                      | 12.92 | 3 | 4 | 5  | 13  | 0.79 | 0.73 | 0.95 | 0.92 | 1.08 | 0.77  | 1.07 | 0.76 | 418   | 47.3 | 5.88 |
| Q8TDG2 | Actin-related protein T1 OS=Homo sapiens GN=ACTRT1 PE=2 SV=2 - [ACTT1_HUMAN]                                   | 6.65  | 1 | 1 | 1  | 5   | 1.48 | 0.93 | 1.72 | 0.96 | 376  | 41.7  | 6.79 |      |       |      |      |
| P68032 | Actin, alpha cardiac muscle 1 OS=Homo sapiens GN=ACTC1 PE=1 SV=1 - [ACTC_HUMAN]                                | 28.12 | 5 | 1 | 11 | 179 | 0.61 | 0.55 | 0.55 | 0.50 | 0.63 | 0.77  | 0.79 | 0.97 | 377   | 42.0 | 5.39 |
| P60709 | Actin, cytoplasmic 1 OS=Homo sapiens GN=ACTB PE=1 SV=1 - [ACTB_HUMAN]                                          | 50.67 | 3 | 4 | 16 | 241 | 0.66 | 0.67 | 0.69 | 0.70 | 0.77 | 0.81  | 0.78 | 0.85 | 375   | 41.7 | 5.48 |
| Q9C0C7 | Activating molecule in BECN1-regulated autophagy protein 1 OS=Homo sapiens GN=AMBRA1 PE=1 SV=2 - [AMRA1_HUMAN] | 0.92  | 1 | 1 | 1  | 1   | 1.45 | 1.38 | 1.51 | 1.45 | 1298 | 142.4 | 7.18 |      |       |      |      |
| Q8N3C0 | Activating signal cointegrator 1 complex subunit 3 OS=Homo sapiens GN=ASCC3 PE=1 SV=3 - [ASCC3_HUMAN]          | 2.27  | 1 | 2 | 3  | 8   | 0.98 | 0.80 | 1.09 | 0.89 | 2202 | 251.3 | 7.09 |      |       |      |      |
| Q5U623 | Activating transcription factor 7-interacting protein 2 OS=Homo sapiens GN=ATF7IP2 PE=1 SV=2 - [MCAF2_HUMAN]   | 5.43  | 1 | 2 | 2  | 2   |      |      |      | 5.54 | 4.10 | 5.12  | 3.79 | 682  | 75.7  | 7.75 |      |
| Q9ULW3 | Activator of basal transcription 1 OS=Homo sapiens GN=ABT1 PE=1 SV=1 - [ABT1_HUMAN]                            | 2.57  | 1 | 1 | 1  | 1   | 0.49 | 0.12 | 0.97 | 0.23 | 272  | 31.1  | 9.88 |      |       |      |      |
| Q9H2P0 | Activity-dependent neuroprotector homeobox protein OS=Homo sapiens GN=ADNP PE=1 SV=1 - [ADNP_HUMAN]            | 1.09  | 1 | 1 | 1  | 1   | 0.12 | 0.14 | 0.11 | 0.13 | 1102 | 123.5 | 7.34 |      |       |      |      |
| Q6JQN1 | Acyl-CoA dehydrogenase family member 10 OS=Homo sapiens GN=ACAD10 PE=2 SV=1 - [ACD10_HUMAN]                    | 1.51  | 1 | 1 | 1  | 1   |      |      |      | 1.03 | 1.04 | 1.09  | 1.10 | 1059 | 118.8 | 8.06 |      |
| Q9H845 | Acyl-CoA dehydrogenase family member 9, mitochondrial OS=Homo sapiens GN=ACAD9 PE=1 SV=1 - [ACAD9_HUMAN]       | 1.45  | 1 | 1 | 1  | 4   |      |      |      | 3.94 | 3.91 | 3.57  | 3.56 | 621  | 68.7  | 7.96 |      |
| Q4L235 | Acyl-CoA synthetase family member 4 OS=Homo sapiens GN=AASDH PE=2 SV=3 - [ACSF4_HUMAN]                         | 2.55  | 1 | 1 | 1  | 2   |      |      |      | 1.19 | 1.16 | 1.16  | 1.13 | 1098 | 122.5 | 7.24 |      |
| Q9BR61 | Acyl-CoA-binding domain-containing protein 6 OS=Homo sapiens GN=ACBD6 PE=1 SV=1 - [ACBD6_HUMAN]                | 3.55  | 1 | 1 | 1  | 1   |      |      |      | 0.85 | 282  | 31.1  | 5.11 |      |       |      |      |
| P07108 | Acyl-CoA-binding protein OS=Homo sapiens GN=DBI PE=1 SV=2 - [ACBP_HUMAN]                                       | 32.18 | 1 | 2 | 2  | 11  |      |      |      | 1.51 | 1.39 | 1.38  | 1.32 | 87   | 10.0  | 6.57 |      |

|        |                                                                                                    |       |   |    |    |    |      |      |      |      |      |      |      |      |      |       |      |
|--------|----------------------------------------------------------------------------------------------------|-------|---|----|----|----|------|------|------|------|------|------|------|------|------|-------|------|
| P0C7M7 | Acyl-coenzyme A synthetase ACSM4, mitochondrial OS=Homo sapiens GN=ACSM4 PE=1 SV=1 - [ACSM4_HUMAN] | 1.03  | 1 | 1  | 1  | 1  | 1.36 | 1.24 | 1.43 | 1.32 |      | 580  | 65.7 | 8.59 |      |       |      |
| Q6NUN0 | Acyl-coenzyme A synthetase ACSM5, mitochondrial OS=Homo sapiens GN=ACSM5 PE=2 SV=2 - [ACSM5_HUMAN] | 1.38  | 1 | 1  | 1  | 1  |      |      |      |      | 1.12 | 1.46 | 1.11 | 1.45 | 579  | 64.7  | 8.40 |
| Q6P461 | Acyl-coenzyme A synthetase ACSM6, mitochondrial OS=Homo sapiens GN=ACSM6 PE=2 SV=3 - [ACSM6_HUMAN] | 5.21  | 1 | 1  | 1  | 1  |      |      |      |      | 1.04 | 1.05 | 1.00 | 1.01 | 480  | 53.5  | 8.41 |
| Q8WXI4 | Acyl-coenzyme A thioesterase 11 OS=Homo sapiens GN=ACOT11 PE=1 SV=1 - [ACOT11_HUMAN]               | 1.81  | 1 | 2  | 2  | 2  |      |      |      |      | 0.66 | 0.84 | 0.70 | 0.88 | 607  | 68.4  | 8.35 |
| Q9Y305 | Acyl-coenzyme A thioesterase 9, mitochondrial OS=Homo sapiens GN=ACOT9 PE=1 SV=2 - [ACOT9_HUMAN]   | 3.64  | 1 | 1  | 1  | 1  |      |      |      |      | 1.44 | 0.83 | 1.27 | 0.73 | 439  | 49.9  | 8.60 |
| O75608 | Acyl-protein thioesterase 1 OS=Homo sapiens GN=LYPLA1 PE=1 SV=1 - [LYPLA1_HUMAN]                   | 5.65  | 1 | 1  | 1  | 4  | 0.99 | 0.98 | 0.86 | 0.87 | 1.10 | 1.17 | 1.11 | 1.18 | 230  | 24.7  | 6.77 |
| O95372 | Acyl-protein thioesterase 2 OS=Homo sapiens GN=LYPLA2 PE=1 SV=1 - [LYPLA2_HUMAN]                   | 3.46  | 1 | 1  | 1  | 2  |      |      |      |      | 1.03 | 1.10 | 0.97 | 1.04 | 231  | 24.7  | 7.23 |
| O15204 | ADAM DEC1 OS=Homo sapiens GN=ADAMDEC1 PE=1 SV=2 - [ADEC1_HUMAN]                                    | 2.77  | 1 | 1  | 1  | 4  | 1.00 | 0.98 | 0.99 | 0.97 | 1.00 | 0.95 | 1.06 | 1.00 | 470  | 52.7  | 7.34 |
| Q86TH1 | ADAMTS-like protein 2 OS=Homo sapiens GN=ADAMTSL2 PE=1 SV=1 - [ATL2_HUMAN]                         | 3.15  | 1 | 3  | 3  | 6  | 1.03 | 1.03 | 1.18 | 1.19 | 0.97 | 0.87 | 0.90 | 0.89 | 951  | 104.6 | 6.42 |
| Q6UY14 | ADAMTS-like protein 4 OS=Homo sapiens GN=ADAMTSL4 PE=1 SV=2 - [ATL4_HUMAN]                         | 7.36  | 1 | 6  | 6  | 30 | 0.96 | 0.85 | 0.94 | 0.92 | 0.98 | 0.88 | 0.98 | 0.93 | 1074 | 116.5 | 8.34 |
| P46108 | Adapter molecule crk OS=Homo sapiens GN=CRK PE=1 SV=2 - [CRK_HUMAN]                                | 2.30  | 1 | 1  | 1  | 3  |      |      |      |      | 1.13 | 1.29 | 1.15 | 1.31 | 304  | 33.8  | 5.55 |
| O43734 | Adapter protein CIKS OS=Homo sapiens GN=TRAF3IP2 PE=1 SV=3 - [CIKS_HUMAN]                          | 3.83  | 1 | 1  | 1  | 1  | 0.87 | 0.80 | 0.91 | 0.85 |      |      |      |      | 574  | 64.6  | 6.76 |
| P07741 | Adenine phosphoribosyltransferase OS=Homo sapiens GN=APRT PE=1 SV=2 - [APT_HUMAN]                  | 21.67 | 1 | 3  | 3  | 7  |      |      |      |      | 1.00 | 0.96 | 0.91 | 0.90 | 180  | 19.6  | 6.02 |
| O95996 | Adenomatous polyposis coli protein 2 OS=Homo sapiens GN=APC2 PE=1 SV=1 - [APC2_HUMAN]              | 1.13  | 1 | 1  | 1  | 1  | 1.12 | 1.12 | 1.25 | 1.25 |      |      |      |      | 2303 | 243.8 | 8.82 |
| P25054 | Adenomatous polyposis coli protein OS=Homo sapiens GN=APC PE=1 SV=2 - [APC_HUMAN]                  | 0.98  | 1 | 2  | 2  | 2  |      |      |      |      | 0.84 | 0.96 | 0.76 | 0.87 | 2843 | 311.5 | 7.80 |
| Q9NZK5 | Adenosine deaminase CECR1 OS=Homo sapiens GN=CECR1 PE=1 SV=2 - [CECR1_HUMAN]                       | 4.70  | 1 | 2  | 2  | 4  | 1.28 | 1.75 | 1.35 | 1.85 | 1.43 | 0.79 | 1.28 | 0.71 | 511  | 58.9  | 7.91 |
| Q8NCV1 | Adenosine deaminase domain-containing protein 2 OS=Homo sapiens GN=ADAD2 PE=2 SV=1 - [ADAD2_HUMAN] | 5.66  | 1 | 1  | 1  | 2  |      |      |      |      | 0.71 | 0.72 | 0.74 | 0.75 | 583  | 61.7  | 8.84 |
| P55263 | Adenosine kinase OS=Homo sapiens GN=ADK PE=1 SV=2 - [ADK_HUMAN]                                    | 2.76  | 1 | 1  | 1  | 1  |      |      |      |      | 1.71 | 1.63 | 1.06 | 1.01 | 362  | 40.5  | 6.70 |
| Q08462 | Adenylate cyclase type 2 OS=Homo sapiens GN=ADCY2 PE=1 SV=5 - [ADCY2_HUMAN]                        | 1.28  | 1 | 1  | 1  | 1  |      |      |      |      | 0.93 | 1.01 | 0.86 | 0.94 | 1091 | 123.5 | 8.09 |
| O95622 | Adenylate cyclase type 5 OS=Homo sapiens GN=ADCY5 PE=1 SV=3 - [ADCY5_HUMAN]                        | 0.63  | 1 | 1  | 1  | 2  | 0.85 | 0.93 | 0.77 | 0.84 |      |      |      |      | 1261 | 138.8 | 7.24 |
| O43306 | Adenylate cyclase type 6 OS=Homo sapiens GN=ADCY6 PE=1 SV=2 - [ADCY6_HUMAN]                        | 1.20  | 1 | 1  | 1  | 3  |      |      |      |      | 1.77 | 2.01 | 1.64 | 1.86 | 1168 | 130.5 | 8.22 |
| P40145 | Adenylate cyclase type 8 OS=Homo sapiens GN=ADCY8 PE=1 SV=1 - [ADCY8_HUMAN]                        | 1.92  | 1 | 2  | 2  | 2  | 0.97 | 1.00 | 0.98 | 1.01 |      |      |      |      | 1251 | 140.0 | 6.99 |
| P54819 | Adenylate kinase 2, mitochondrial OS=Homo sapiens GN=AK2 PE=1 SV=2 - [KAD2_HUMAN]                  | 10.46 | 1 | 1  | 1  | 1  |      |      |      |      | 1.42 |      |      |      | 239  | 26.5  | 7.81 |
| P00568 | Adenylate kinase isoenzyme 1 OS=Homo sapiens GN=AK1 PE=1 SV=3 - [KAD1_HUMAN]                       | 13.40 | 1 | 2  | 2  | 7  | 0.82 | 0.68 | 0.84 | 0.70 | 1.01 | 1.06 | 0.93 | 0.97 | 194  | 21.6  | 8.63 |
| P30566 | Adenylosuccinate lyase OS=Homo sapiens GN=ADSL PE=1 SV=2 - [PUR8_HUMAN]                            | 4.96  | 1 | 1  | 1  | 1  | 1.11 | 1.16 | 1.72 | 1.81 |      |      |      |      | 484  | 54.9  | 7.11 |
| Q01518 | Adenylyl cyclase-associated protein 1 OS=Homo sapiens GN=CAP1 PE=1 SV=5 - [CAP1_HUMAN]             | 31.58 | 1 | 11 | 11 | 45 | 0.69 | 0.82 | 0.75 | 0.85 | 0.89 | 0.91 | 0.84 | 0.86 | 475  | 51.9  | 8.06 |
| O95396 | Adenylyltransferase and sulfurtransferase MOCS3 OS=Homo sapiens GN=MOCS3 PE=1 SV=1 - [MOCS3_HUMAN] | 2.17  | 1 | 1  | 1  | 1  |      |      |      |      | 1.05 | 1.01 | 1.05 | 1.01 | 460  | 49.6  | 6.21 |

|        |                                                                                                          |       |   |    |    |      |      |      |      |      |      |      |      |      |      |       |      |
|--------|----------------------------------------------------------------------------------------------------------|-------|---|----|----|------|------|------|------|------|------|------|------|------|------|-------|------|
| Q9HDC9 | Adipocyte plasma membrane-associated protein OS=Homo sapiens GN=APMAP PE=1 SV=2 - [APMAP_HUMAN]          | 31.73 | 1 | 11 | 11 | 54   | 1.07 | 1.02 | 1.01 | 1.00 | 0.95 | 0.98 | 0.89 | 1.02 | 416  | 46.5  | 6.16 |
| Q15848 | Adiponectin OS=Homo sapiens GN=ADIPOQ PE=1 SV=1 - [ADIPO_HUMAN]                                          | 27.05 | 1 | 5  | 5  | 31   | 1.21 | 1.27 | 1.26 | 1.30 | 1.06 | 1.13 | 0.99 | 1.05 | 244  | 26.4  | 5.74 |
| Q86V24 | Adiponectin receptor protein 2 OS=Homo sapiens GN=ADIPOR2 PE=1 SV=1 - [ADR2_HUMAN]                       | 4.40  | 1 | 1  | 1  | 1    |      |      |      |      | 0.37 | 1.14 | 0.55 | 1.67 | 386  | 43.9  | 6.60 |
| Q61Q32 | ADNP homeobox protein 2 OS=Homo sapiens GN=ADNP2 PE=1 SV=1 - [ADNP2_HUMAN]                               | 1.50  | 1 | 2  | 2  | 3    | 1.29 | 1.64 | 1.19 | 1.52 | 0.81 | 0.90 | 0.73 | 0.81 | 1131 | 122.8 | 9.16 |
| Q9BW91 | ADP-ribose pyrophosphatase, mitochondrial OS=Homo sapiens GN=NUDT9 PE=1 SV=1 - [NUDT9_HUMAN]             | 10.86 | 1 | 2  | 2  | 2    | 1.15 | 1.34 | 1.32 | 1.57 |      |      |      |      | 350  | 39.1  | 8.22 |
| Q10588 | ADP-ribosyl cyclase 2 OS=Homo sapiens GN=BST1 PE=1 SV=2 - [BST1_HUMAN]                                   | 15.41 | 1 | 5  | 5  | 12   | 1.28 | 1.26 | 1.25 | 1.25 | 0.89 | 0.99 | 0.91 | 0.95 | 318  | 35.7  | 7.80 |
| P61204 | ADP-ribosylation factor 3 OS=Homo sapiens GN=ARF3 PE=1 SV=2 - [ARF3_HUMAN]                               | 22.10 | 2 | 3  | 4  | 13   | 0.93 | 1.00 | 0.90 | 0.97 | 0.93 | 0.91 | 0.98 | 0.96 | 181  | 20.6  | 7.43 |
| P18085 | ADP-ribosylation factor 4 OS=Homo sapiens GN=ARF4 PE=1 SV=3 - [ARF4_HUMAN]                               | 9.44  | 1 | 2  | 2  | 4    | 0.99 | 1.00 | 0.90 | 0.94 |      |      |      |      | 180  | 20.5  | 7.14 |
| P84085 | ADP-ribosylation factor 5 OS=Homo sapiens GN=ARF5 PE=1 SV=2 - [ARF5_HUMAN]                               | 23.33 | 1 | 3  | 4  | 7    | 0.90 | 0.95 | 0.93 | 0.95 | 1.32 | 1.32 | 1.18 | 1.18 | 180  | 20.5  | 6.79 |
| Q8N6H7 | ADP-ribosylation factor GTPase-activating protein 2 OS=Homo sapiens GN=ARFGAP2 PE=1 SV=1 - [ARFG2_HUMAN] | 1.54  | 1 | 1  | 1  | 2    | 1.77 | 1.74 | 1.72 | 1.69 |      |      |      |      | 521  | 56.7  | 7.99 |
| Q9UJY5 | ADP-ribosylation factor-binding protein GGA1 OS=Homo sapiens GN=GGA1 PE=1 SV=1 - [GGA1_HUMAN]            | 3.29  | 1 | 1  | 1  | 33   | 0.91 | 1.00 | 0.89 | 1.00 | 0.94 | 0.98 | 0.90 | 1.17 | 639  | 70.3  | 5.29 |
| Q9UJY4 | ADP-ribosylation factor-binding protein GGA2 OS=Homo sapiens GN=GGA2 PE=1 SV=3 - [GGA2_HUMAN]            | 1.79  | 1 | 1  | 1  | 3    | 1.98 | 2.11 | 1.85 | 1.97 | 0.35 | 0.78 | 0.77 | 1.73 | 613  | 67.1  | 6.55 |
| P36404 | ADP-ribosylation factor-like protein 2 OS=Homo sapiens GN=ARL2 PE=1 SV=4 - [ARL2_HUMAN]                  | 9.78  | 1 | 1  | 1  | 1    |      | 0.58 |      | 0.56 |      |      |      |      | 184  | 20.9  | 6.34 |
| P56559 | ADP-ribosylation factor-like protein 4C OS=Homo sapiens GN=ARL4C PE=1 SV=1 - [ARL4C_HUMAN]               | 7.29  | 1 | 1  | 1  | 1    | 0.94 | 1.36 | 0.96 | 1.39 |      |      |      |      | 192  | 21.5  | 9.09 |
| Q96BM9 | ADP-ribosylation factor-like protein 8A OS=Homo sapiens GN=ARL8A PE=1 SV=1 - [ARL8A_HUMAN]               | 10.22 | 2 | 2  | 2  | 2    |      |      |      |      | 2.74 | 2.09 | 2.67 | 2.04 | 186  | 21.4  | 7.77 |
| Q6T311 | ADP-ribosylation factor-like protein 9 OS=Homo sapiens GN=ARL9 PE=2 SV=1 - [ARL9_HUMAN]                  | 6.95  | 1 | 1  | 1  | 1    |      |      |      |      | 1.01 | 0.71 | 1.22 | 0.86 | 187  | 20.7  | 6.52 |
| Q13795 | ADP-ribosylation factor-related protein 1 OS=Homo sapiens GN=ARFRP1 PE=1 SV=1 - [ARFRP_HUMAN]            | 17.91 | 1 | 1  | 1  | 5    | 0.53 |      | 1.15 |      | 0.90 | 0.80 | 0.81 | 0.89 | 201  | 22.6  | 7.56 |
| P05141 | ADP/ATP translocase 2 OS=Homo sapiens GN=SLC25A5 PE=1 SV=7 - [ADT2_HUMAN]                                | 7.05  | 4 | 2  | 2  | 3    | 0.28 | 0.34 | 0.29 | 0.35 |      |      |      |      | 298  | 32.8  | 9.69 |
| O75366 | Advillin OS=Homo sapiens GN=AVIL PE=1 SV=3 - [AVIL_HUMAN]                                                | 1.71  | 1 | 1  | 1  | 1    | 0.90 | 0.92 | 0.85 | 0.89 |      |      |      |      | 819  | 92.0  | 5.71 |
| P51816 | AF4/FMR2 family member 2 OS=Homo sapiens GN=AFF2 PE=1 SV=4 - [AFF2_HUMAN]                                | 1.22  | 1 | 2  | 2  | 5    | 0.96 | 1.35 | 0.95 | 1.34 | 1.20 | 1.14 | 1.09 | 1.21 | 1311 | 144.7 | 8.05 |
| P51826 | AF4/FMR2 family member 3 OS=Homo sapiens GN=AFF3 PE=1 SV=2 - [AFF3_HUMAN]                                | 5.46  | 1 | 2  | 2  | 5    |      |      |      |      | 0.65 | 0.63 | 0.71 | 0.67 | 1226 | 133.4 | 8.10 |
| Q9UHB7 | AF4/FMR2 family member 4 OS=Homo sapiens GN=AFF4 PE=1 SV=1 - [AFF4_HUMAN]                                | 1.55  | 1 | 1  | 1  | 1    | 1.34 | 0.89 | 1.31 | 0.88 |      |      |      |      | 1163 | 127.4 | 9.31 |
| P55196 | Afadin OS=Homo sapiens GN=MLLT4 PE=1 SV=3 - [AFAD_HUMAN]                                                 | 0.88  | 1 | 1  | 1  | 7    | 0.75 | 0.72 | 0.83 | 0.78 | 0.87 | 0.78 | 0.91 | 0.91 | 1824 | 206.7 | 6.47 |
| P43652 | Afamin OS=Homo sapiens GN=AFM PE=1 SV=1 - [AFAM_HUMAN]                                                   | 69.28 | 1 | 47 | 47 | 1476 | 1.09 | 1.09 | 1.09 | 1.09 | 1.12 | 1.14 | 1.11 | 1.13 | 599  | 69.0  | 5.90 |
| Q9Y4W6 | AFG3-like protein 2 OS=Homo sapiens GN=AFG3L2 PE=1 SV=2 - [AFG32_HUMAN]                                  | 3.64  | 1 | 2  | 2  | 2    | 0.73 | 0.64 | 0.78 | 0.69 | 0.96 | 0.98 | 0.86 | 0.87 | 797  | 88.5  | 8.66 |
| O95154 | Aflatoxin B1 aldehyde reductase member 3 OS=Homo sapiens GN=AKR7A3 PE=1 SV=2 - [ARK73_HUMAN]             | 4.53  | 1 | 1  | 1  | 1    |      |      |      |      | 0.91 | 0.96 | 0.72 | 0.76 | 331  | 37.2  | 7.15 |
| P42127 | Agouti-signaling protein OS=Homo sapiens GN=ASIP PE=1 SV=1 - [ASIP_HUMAN]                                | 9.09  | 1 | 1  | 1  | 1    |      |      |      |      | 0.87 | 0.75 | 0.82 | 0.70 | 132  | 14.5  | 9.64 |

|        |                                                                                                                            |       |   |     |     |       |      |      |      |      |      |      |      |      |      |       |      |
|--------|----------------------------------------------------------------------------------------------------------------------------|-------|---|-----|-----|-------|------|------|------|------|------|------|------|------|------|-------|------|
| P24298 | Alanine aminotransferase 1 OS=Homo sapiens GN=GPT PE=1 SV=3 - [ALAT1_HUMAN]                                                | 1.81  | 1 | 1   | 1   | 3     | 0.75 | 0.76 | 0.78 | 0.79 | 0.93 | 1.19 | 1.10 | 1.41 | 496  | 54.6  | 7.18 |
| Q8IUZ5 | Alanine-glyoxylate aminotransferase 2-like 2 OS=Homo sapiens GN=AGXT2L2 PE=2 SV=1 - [AT2L2_HUMAN]                          | 5.78  | 1 | 2   | 2   | 2     |      |      |      |      | 0.76 | 1.01 | 0.73 | 1.20 | 450  | 49.7  | 6.76 |
| Q5JTZ9 | Alanine-tRNA ligase, mitochondrial OS=Homo sapiens GN=AARS2 PE=1 SV=1 - [SYAM_HUMAN]                                       | 2.64  | 1 | 1   | 1   | 1     |      |      |      |      | 0.74 |      |      |      | 985  | 107.3 | 6.27 |
| P47895 | Aldehyde dehydrogenase family 1 member A3 OS=Homo sapiens GN=ALDH1A3 PE=1 SV=2 - [AL1A3_HUMAN]                             | 4.49  | 1 | 2   | 2   | 3     | 0.87 | 0.78 | 0.80 | 0.73 | 1.05 | 0.88 | 0.97 | 0.81 | 512  | 56.1  | 7.25 |
| P30837 | Aldehyde dehydrogenase X, mitochondrial OS=Homo sapiens GN=ALDH1B1 PE=1 SV=3 - [AL1B1_HUMAN]                               | 3.29  | 1 | 1   | 1   | 2     | 0.10 | 0.12 | 0.12 | 0.15 |      |      |      |      | 517  | 57.2  | 6.80 |
| P05091 | Aldehyde dehydrogenase, mitochondrial OS=Homo sapiens GN=ALDH2 PE=1 SV=2 - [ALDH2_HUMAN]                                   | 3.09  | 1 | 1   | 2   | 3     | 0.82 | 0.88 | 0.78 | 0.84 |      |      |      |      | 517  | 56.3  | 7.05 |
| Q06278 | Aldehyde oxidase OS=Homo sapiens GN=AOX1 PE=2 SV=2 - [ADO_HUMAN]                                                           | 0.90  | 1 | 1   | 1   | 2     | 0.99 | 0.80 | 1.29 | 1.05 |      |      |      |      | 1338 | 147.8 | 7.17 |
| O60218 | Aldo-keto reductase family 1 member B10 OS=Homo sapiens GN=AKR1B10 PE=1 SV=2 - [AK1BA_HUMAN]                               | 2.53  | 2 | 1   | 1   | 1     | 1.53 | 1.11 | 1.43 | 1.04 |      |      |      |      | 316  | 36.0  | 7.84 |
| Q9UM73 | ALK tyrosine kinase receptor OS=Homo sapiens GN=ALK PE=1 SV=3 - [ALK_HUMAN]                                                | 0.49  | 1 | 1   | 1   | 4     |      |      |      |      | 0.91 | 1.23 | 0.82 | 1.10 | 1620 | 176.3 | 7.08 |
| P05186 | Alkaline phosphatase, tissue-nonspecific isozyme OS=Homo sapiens GN=ALPL PE=1 SV=4 - [PPBT_HUMAN]                          | 1.72  | 1 | 1   | 1   | 2     |      |      |      |      | 0.84 | 0.77 | 0.93 | 0.86 | 524  | 57.3  | 6.67 |
| Q6NUM9 | All-trans-retinol 13,14-reductase OS=Homo sapiens GN=RETSAT PE=2 SV=2 - [RETST_HUMAN]                                      | 5.90  | 1 | 2   | 2   | 2     | 1.06 | 1.00 | 1.17 | 1.11 | 1.06 | 0.99 | 1.13 | 1.06 | 610  | 66.8  | 8.28 |
| P55008 | Allograft inflammatory factor 1 OS=Homo sapiens GN=AIF1 PE=1 SV=1 - [AIF1_HUMAN]                                           | 11.56 | 1 | 2   | 2   | 3     |      |      |      |      | 1.17 | 0.93 | 1.13 | 0.90 | 147  | 16.7  | 6.24 |
| Q9BQI0 | Allograft inflammatory factor 1-like OS=Homo sapiens GN=AIF1L PE=1 SV=1 - [AIF1L_HUMAN]                                    | 4.00  | 1 | 1   | 1   | 2     |      |      |      |      | 1.58 | 1.21 | 1.50 | 1.15 | 150  | 17.1  | 7.20 |
| Q11128 | Alpha-(1,3)-fucosyltransferase OS=Homo sapiens GN=FUT5 PE=2 SV=1 - [FUT5_HUMAN]                                            | 8.82  | 2 | 2   | 2   | 2     |      |      |      |      | 1.02 | 0.46 | 1.23 | 0.56 | 374  | 43.0  | 8.28 |
| P51993 | Alpha-(1,3)-fucosyltransferase OS=Homo sapiens GN=FUT6 PE=1 SV=1 - [FUT6_HUMAN]                                            | 1.95  | 1 | 1   | 1   | 3     |      |      |      |      | 0.86 | 0.69 | 0.85 | 0.90 | 359  | 41.8  | 8.68 |
| P02763 | Alpha-1-acid glycoprotein 1 OS=Homo sapiens GN=ORM1 PE=1 SV=1 - [A1AG1_HUMAN]                                              | 64.18 | 1 | 9   | 17  | 1658  | 1.07 | 1.13 | 1.18 | 1.15 | 1.12 | 0.98 | 1.15 | 0.99 | 201  | 23.5  | 5.02 |
| P19652 | Alpha-1-acid glycoprotein 2 OS=Homo sapiens GN=ORM2 PE=1 SV=2 - [A1AG2_HUMAN]                                              | 65.67 | 1 | 8   | 16  | 1888  | 1.14 | 1.09 | 1.17 | 1.10 | 1.24 | 1.11 | 1.25 | 1.13 | 201  | 23.6  | 5.11 |
| P01011 | Alpha-1-antichymotrypsin OS=Homo sapiens GN=SERPINA3 PE=1 SV=2 - [AACT_HUMAN]                                              | 65.01 | 1 | 29  | 29  | 1203  | 1.09 | 1.16 | 1.08 | 1.12 | 1.03 | 1.07 | 0.99 | 1.04 | 423  | 47.6  | 5.52 |
| P01009 | Alpha-1-antitrypsin OS=Homo sapiens GN=SERPINA1 PE=1 SV=3 - [A1AT_HUMAN]                                                   | 84.69 | 1 | 55  | 57  | 13969 | 1.22 | 1.19 | 1.22 | 1.19 | 1.06 | 1.05 | 1.04 | 1.06 | 418  | 46.7  | 5.59 |
| P26572 | Alpha-1,3-mannosyl-glycoprotein 2-beta-N-acetylglucosaminyltransferase OS=Homo sapiens GN=MGAT1 PE=2 SV=2 - [MGAT1_HUMAN]  | 4.94  | 1 | 2   | 2   | 3     | 0.97 | 1.02 | 0.96 | 1.02 |      |      |      |      | 445  | 50.8  | 9.16 |
| Q09328 | Alpha-1,6-mannosylglycoprotein 6-beta-N-acetylglucosaminyltransferase A OS=Homo sapiens GN=MGAT5 PE=1 SV=1 - [MGT5A_HUMAN] | 1.62  | 1 | 1   | 1   | 24    | 1.11 | 1.14 | 1.14 | 1.20 | 1.14 | 1.09 | 1.25 | 1.14 | 741  | 84.5  | 8.12 |
| P35348 | Alpha-1A adrenergic receptor OS=Homo sapiens GN=ADRA1A PE=2 SV=2 - [ADA1A_HUMAN]                                           | 8.15  | 1 | 2   | 2   | 2     |      |      |      |      | 0.63 | 0.60 | 0.80 | 0.76 | 466  | 51.5  | 9.03 |
| P04217 | Alpha-1B-glycoprotein OS=Homo sapiens GN=A1BG PE=1 SV=4 - [A1BG_HUMAN]                                                     | 58.18 | 1 | 29  | 29  | 2052  | 1.05 | 1.04 | 1.06 | 1.05 | 0.79 | 0.75 | 0.81 | 0.81 | 495  | 54.2  | 5.86 |
| P08697 | Alpha-2-antiplasmin OS=Homo sapiens GN=SERPINF2 PE=1 SV=3 - [A2AP_HUMAN]                                                   | 51.32 | 1 | 23  | 23  | 526   | 1.13 | 1.10 | 1.11 | 1.09 | 1.06 | 1.06 | 1.00 | 1.01 | 491  | 54.5  | 6.29 |
| P02765 | Alpha-2-HS-glycoprotein OS=Homo sapiens GN=AHSG PE=1 SV=1 - [FETUA_HUMAN]                                                  | 67.57 | 1 | 21  | 21  | 2624  | 1.20 | 1.15 | 1.16 | 1.13 | 0.87 | 0.84 | 0.93 | 0.95 | 367  | 39.3  | 5.72 |
| P01023 | Alpha-2-macroglobulin OS=Homo sapiens GN=A2M PE=1 SV=3 - [A2MG_HUMAN]                                                      | 75.37 | 7 | 106 | 122 | 15003 | 1.19 | 1.25 | 1.21 | 1.26 | 1.15 | 1.19 | 1.12 | 1.17 | 1474 | 163.2 | 6.46 |
| Q92186 | Alpha-2,8-sialyltransferase 8B OS=Homo sapiens GN=ST8SIA2 PE=2 SV=1 - [SIA8B_HUMAN]                                        | 5.07  | 1 | 2   | 2   | 2     |      |      |      |      | 1.01 | 0.54 | 1.36 | 0.72 | 375  | 42.4  | 9.44 |



|        |                                                                                                                     |       |   |    |    |    |      |      |      |      |      |      |      |      |      |       |      |
|--------|---------------------------------------------------------------------------------------------------------------------|-------|---|----|----|----|------|------|------|------|------|------|------|------|------|-------|------|
| O15466 | Alpha-2,8-sialyltransferase 8E OS=Homo sapiens GN=ST8SIA5 PE=2 SV=2 - [SIA8E_HUMAN]                                 | 3.19  | 1 | 1  | 1  | 31 | 1.15 | 1.00 | 1.02 | 0.92 | 0.90 | 0.84 | 0.98 | 0.89 | 376  | 43.9  | 9.01 |
| P12814 | Alpha-actinin-1 OS=Homo sapiens GN=ACTN1 PE=1 SV=2 - [ACTN1_HUMAN]                                                  | 39.13 | 1 | 16 | 31 | 81 | 0.66 | 0.67 | 0.65 | 0.67 | 0.89 | 1.00 | 1.86 | 2.09 | 892  | 103.0 | 5.41 |
| P35609 | Alpha-actinin-2 OS=Homo sapiens GN=ACTN2 PE=1 SV=1 - [ACTN2_HUMAN]                                                  | 15.77 | 1 | 3  | 14 | 29 | 0.72 | 0.68 | 0.75 | 0.70 |      |      |      |      | 894  | 103.8 | 5.45 |
| O43707 | Alpha-actinin-4 OS=Homo sapiens GN=ACTN4 PE=1 SV=2 - [ACTN4_HUMAN]                                                  | 20.97 | 1 | 4  | 17 | 43 | 0.86 | 0.74 | 0.85 | 0.74 |      |      |      |      | 911  | 104.8 | 5.44 |
| P04745 | Alpha-amylase 1 OS=Homo sapiens GN=AMY1A PE=1 SV=2 - [AMY1_HUMAN]                                                   | 4.70  | 1 | 1  | 2  | 8  | 1.01 | 1.22 | 1.16 | 1.41 | 1.59 | 2.00 | 1.31 | 1.64 | 511  | 57.7  | 6.93 |
| P19961 | Alpha-amylase 2B OS=Homo sapiens GN=AMY2B PE=1 SV=1 - [AMY2B_HUMAN]                                                 | 4.70  | 1 | 1  | 2  | 4  | 1.55 | 1.56 | 1.79 | 1.83 |      |      |      |      | 511  | 57.7  | 7.09 |
| P06733 | Alpha-enolase OS=Homo sapiens GN=ENO1 PE=1 SV=2 - [ENOA_HUMAN]                                                      | 32.49 | 3 | 11 | 11 | 25 | 0.71 | 0.61 | 0.80 | 0.67 | 0.79 | 0.82 | 0.71 | 0.74 | 434  | 47.1  | 7.39 |
| P02771 | Alpha-fetoprotein OS=Homo sapiens GN=AFP PE=1 SV=1 - [FETA_HUMAN]                                                   | 2.30  | 1 | 1  | 1  | 4  |      |      |      | 0.03 |      |      |      |      | 609  | 68.6  | 5.68 |
| Q16352 | Alpha-intermexin OS=Homo sapiens GN=INA PE=1 SV=2 - [AIXN_HUMAN]                                                    | 5.21  | 1 | 2  | 2  | 2  | 1.74 | 1.10 | 1.80 | 1.16 |      |      |      |      | 499  | 55.4  | 5.40 |
| P00709 | Alpha-lactalbumin OS=Homo sapiens GN=LALBA PE=1 SV=1 [LALBA_HUMAN]                                                  | 15.49 | 1 | 2  | 2  | 4  |      |      |      |      | 8.19 | 4.91 | 5.97 | 3.57 | 142  | 16.2  | 5.00 |
| Q16706 | Alpha-mannosidase 2 OS=Homo sapiens GN=MAN2A1 PE=1 SV=2 - [MA2A1_HUMAN]                                             | 10.93 | 1 | 9  | 9  | 16 | 1.08 | 1.05 | 1.02 | 1.03 |      |      |      |      | 1144 | 131.1 | 7.58 |
| P49641 | Alpha-mannosidase 2x OS=Homo sapiens GN=MAN2A2 PE=2 SV=3 - [MA2A2_HUMAN]                                            | 3.91  | 1 | 3  | 3  | 4  | 1.05 | 1.03 | 1.02 | 1.06 |      |      |      |      | 1150 | 130.5 | 6.84 |
| Q9NSC7 | Alpha-N-acetylgalactosaminide alpha-2,6-sialyltransferase 1 OS=Homo sapiens GN=ST6GALNAC1 PE=1 SV=1 - [SIA7A_HUMAN] | 2.00  | 1 | 1  | 1  | 1  | 1.34 | 1.11 | 1.58 | 1.31 |      |      |      |      | 600  | 68.5  | 9.92 |
| Q9UJ37 | Alpha-N-acetylgalactosaminide alpha-2,6-sialyltransferase 2 OS=Homo sapiens GN=ST6GALNAC2 PE=1 SV=1 - [SIA7B_HUMAN] | 2.41  | 1 | 1  | 1  | 1  |      |      |      |      | 0.98 | 0.99 | 0.92 | 0.93 | 374  | 41.9  | 9.32 |
| P54802 | Alpha-N-acetylglucosaminidase OS=Homo sapiens GN=NAGLU PE=1 SV=2 - [ANAG_HUMAN]                                     | 17.09 | 1 | 9  | 9  | 28 | 1.09 | 1.08 | 1.12 | 1.12 | 1.19 | 1.17 | 1.35 | 1.19 | 743  | 82.2  | 6.65 |
| Q96QP1 | Alpha-protein kinase 1 OS=Homo sapiens GN=ALPK1 PE=2 SV=3 - [ALPK1_HUMAN]                                           | 3.54  | 1 | 2  | 2  | 3  | 2.03 | 1.89 | 2.09 | 1.95 | 1.39 | 0.79 | 1.20 | 0.68 | 1244 | 138.8 | 6.24 |
| Q86TB3 | Alpha-protein kinase 2 OS=Homo sapiens GN=ALPK2 PE=1 SV=3 - [ALPK2_HUMAN]                                           | 2.76  | 1 | 3  | 3  | 3  | 1.15 | 1.16 | 1.06 | 1.10 | 0.93 | 1.05 | 0.92 | 1.04 | 2170 | 236.9 | 5.24 |
| Q96L96 | Alpha-protein kinase 3 OS=Homo sapiens GN=ALPK3 PE=2 SV=2 - [ALPK3_HUMAN]                                           | 1.31  | 1 | 1  | 1  | 1  |      |      |      |      | 0.39 | 0.22 | 1.13 | 0.65 | 1907 | 201.1 | 7.58 |
| P54920 | Alpha-soluble NSF attachment protein OS=Homo sapiens GN=NAPA PE=1 SV=3 - [SNAA_HUMAN]                               | 5.08  | 1 | 1  | 1  | 3  |      |      |      |      | 0.27 | 0.23 | 0.90 | 0.66 | 295  | 33.2  | 5.36 |
| P37840 | Alpha-synuclein OS=Homo sapiens GN=SNCA PE=1 SV=1 - [SYUA_HUMAN]                                                    | 41.43 | 2 | 4  | 4  | 16 |      |      |      |      | 0.93 | 0.93 | 0.79 | 0.94 | 140  | 14.5  | 4.70 |
| O75443 | Alpha-tectorin OS=Homo sapiens GN=TECTA PE=1 SV=3 - [TECTA_HUMAN]                                                   | 1.16  | 1 | 2  | 2  | 4  | 1.07 | 1.13 | 1.24 | 1.36 | 1.32 | 1.41 | 1.26 | 1.34 | 2155 | 239.4 | 5.40 |
| Q60I27 | ALS2 C-terminal-like protein OS=Homo sapiens GN=ALS2CL PE=1 SV=1 - [AL2CL_HUMAN]                                    | 3.46  | 1 | 2  | 2  | 2  |      |      |      |      | 0.73 | 0.66 | 0.92 | 0.83 | 953  | 107.7 | 6.15 |
| Q8TCU4 | Alstrom syndrome protein 1 OS=Homo sapiens GN=ALMS1 PE=1 SV=3 - [ALMS1_HUMAN]                                       | 0.48  | 1 | 2  | 2  | 2  | 0.94 | 0.97 | 0.77 | 0.80 |      |      |      |      | 4167 | 460.7 | 6.28 |
| Q06203 | Amidophosphoribosyltransferase OS=Homo sapiens GN=PPAT PE=1 SV=1 - [PUR1_HUMAN]                                     | 4.45  | 1 | 1  | 1  | 1  | 0.66 | 0.19 |      |      |      |      |      |      | 517  | 57.4  | 6.76 |
| P51172 | Amiloride-sensitive sodium channel subunit delta OS=Homo sapiens GN=SCNN1D PE=1 SV=2 - [SCNND_HUMAN]                | 3.13  | 1 | 1  | 1  | 2  | 1.34 | 1.29 | 1.16 | 1.13 |      |      |      |      | 638  | 70.2  | 7.87 |
| P51170 | Amiloride-sensitive sodium channel subunit gamma OS=Homo sapiens GN=SCNN1G PE=1 SV=4 - [SCNNG_HUMAN]                | 2.31  | 1 | 1  | 1  | 1  |      |      |      |      | 0.09 | 0.11 | 0.09 | 0.12 | 649  | 74.2  | 7.50 |
| Q03154 | Aminoacylase-1 OS=Homo sapiens GN=ACY1 PE=1 SV=1 - [ACY1_HUMAN]                                                     | 3.68  | 1 | 1  | 1  | 1  | 0.79 | 0.92 | 0.97 | 1.13 |      |      |      |      | 408  | 45.9  | 6.18 |

|        |                                                                                                                                      |       |   |    |    |    |      |      |      |      |      |      |      |      |      |       |      |      |     |      |      |
|--------|--------------------------------------------------------------------------------------------------------------------------------------|-------|---|----|----|----|------|------|------|------|------|------|------|------|------|-------|------|------|-----|------|------|
| A2RU49 | Aminoglycoside phosphotransferase domain-containing protein 1 OS=Homo sapiens GN=AGPHD1 PE=2 SV=2 - [AGPD1_HUMAN]                    | 6.43  | 1 | 1  | 1  | 1  |      |      |      |      |      |      |      |      | 1.69 | 1.44  | 1.56 | 1.33 | 373 | 41.9 | 6.84 |
| P15144 | Aminopeptidase N OS=Homo sapiens GN=ANPEP PE=1 SV=4 - [AMPN_HUMAN]                                                                   | 11.58 | 1 | 12 | 12 | 33 | 0.93 | 0.95 | 0.98 | 1.00 | 0.91 | 0.97 | 0.91 | 0.98 | 967  | 109.5 | 5.48 |      |     |      |      |
| Q8N6M6 | Aminopeptidase O OS=Homo sapiens GN=AOPEP PE=1 SV=2 - [AMPO_HUMAN]                                                                   | 1.83  | 1 | 1  | 1  | 2  | 1.16 | 1.24 | 1.27 | 1.36 |      |      |      |      | 819  | 93.5  | 6.19 |      |     |      |      |
| Q6Q4G3 | Aminopeptidase Q OS=Homo sapiens GN=AQPEP PE=1 SV=4 - [AMPQ_HUMAN]                                                                   | 0.91  | 1 | 1  | 1  | 2  |      |      |      |      | 0.68 | 0.81 | 0.63 | 0.74 | 990  | 113.2 | 5.63 |      |     |      |      |
| Q86SJ2 | Amphoterin-induced protein 2 OS=Homo sapiens GN=AMIGO2 PE=1 SV=1 - [AMGO2_HUMAN]                                                     | 11.49 | 1 | 3  | 4  | 5  | 1.10 | 0.98 | 1.11 | 0.99 | 0.32 | 0.07 | 0.34 | 0.08 | 522  | 57.9  | 8.40 |      |     |      |      |
| Q86WK7 | Amphoterin-induced protein 3 OS=Homo sapiens GN=AMIGO3 PE=2 SV=1 - [AMGO3_HUMAN]                                                     | 7.34  | 1 | 3  | 3  | 5  |      |      |      |      | 1.13 | 1.10 | 1.04 | 0.96 | 504  | 55.2  | 7.87 |      |     |      |      |
| Q99767 | Amyloid beta A4 precursor protein-binding family A member 2 OS=Homo sapiens GN=APBA2 PE=1 SV=3 - [APBA2_HUMAN]                       | 2.67  | 1 | 1  | 1  | 1  | 1.61 | 1.03 | 1.53 | 0.98 |      |      |      |      | 749  | 82.5  | 4.86 |      |     |      |      |
| Q7Z5R6 | Amyloid beta A4 precursor protein-binding family B member 1-interacting protein OS=Homo sapiens GN=APBB1IP PE=1 SV=1 - [AB1IP_HUMAN] | 3.45  | 1 | 1  | 1  | 1  | 0.74 | 0.64 | 0.77 | 0.67 |      |      |      |      | 666  | 73.1  | 5.59 |      |     |      |      |
| Q92870 | Amyloid beta A4 precursor protein-binding family B member 2 OS=Homo sapiens GN=APBB2 PE=1 SV=3 - [APBB2_HUMAN]                       | 2.77  | 1 | 1  | 1  | 1  | 0.34 | 0.34 | 0.32 | 0.32 |      |      |      |      | 758  | 83.3  | 6.10 |      |     |      |      |
| O95704 | Amyloid beta A4 precursor protein-binding family B member 3 OS=Homo sapiens GN=APBB3 PE=1 SV=2 - [APBB3_HUMAN]                       | 3.50  | 1 | 1  | 1  | 1  | 1.40 | 1.29 | 1.38 | 1.28 |      |      |      |      | 486  | 52.6  | 6.40 |      |     |      |      |
| P05067 | Amyloid beta A4 protein OS=Homo sapiens GN=APP PE=1 SV=3 - [A4_HUMAN]                                                                | 15.19 | 2 | 11 | 11 | 31 | 1.29 | 1.33 | 1.27 | 1.35 | 1.13 | 1.07 | 1.18 | 1.06 | 770  | 86.9  | 4.82 |      |     |      |      |
| Q9H8U3 | AN1-type zinc finger protein 3 OS=Homo sapiens GN=ZFAND3 PE=1 SV=1 - [ZFAN3_HUMAN]                                                   | 3.96  | 1 | 1  | 1  | 1  |      |      |      |      | 1.14 | 1.13 | 1.29 | 1.28 | 227  | 25.2  | 7.43 |      |     |      |      |
| Q9H1A4 | Anaphase-promoting complex subunit 1 OS=Homo sapiens GN=ANAPC1 PE=1 SV=1 - [APC1_HUMAN]                                              | 2.42  | 1 | 3  | 3  | 4  | 0.67 | 0.79 | 0.62 | 0.77 | 1.06 | 1.23 | 0.74 | 0.85 | 1944 | 216.4 | 6.30 |      |     |      |      |
| Q9UJX4 | Anaphase-promoting complex subunit 5 OS=Homo sapiens GN=ANAPC5 PE=1 SV=2 - [APC5_HUMAN]                                              | 1.19  | 1 | 1  | 1  | 1  | 1.08 | 0.82 | 0.96 | 0.74 |      |      |      |      | 755  | 85.0  | 6.87 |      |     |      |      |
| P10275 | Androgen receptor OS=Homo sapiens GN=AR PE=1 SV=2 - [ANDR_HUMAN]                                                                     | 1.85  | 1 | 1  | 1  | 1  | 0.08 | 0.23 | 0.43 | 1.22 |      |      |      |      | 919  | 98.9  | 6.42 |      |     |      |      |
| Q8N7X0 | Androglobin OS=Homo sapiens GN=ADGB PE=2 SV=3 - [ADGB_HUMAN]                                                                         | 1.68  | 1 | 2  | 2  | 5  | 0.80 | 0.37 | 0.81 | 0.38 | 1.27 | 1.27 | 1.09 | 1.17 | 1667 | 189.6 | 8.31 |      |     |      |      |
| P03950 | Angiogenin OS=Homo sapiens GN=ANG PE=1 SV=1 - [ANG1_HUMAN]                                                                           | 62.59 | 1 | 9  | 9  | 42 | 1.11 | 1.11 | 1.06 | 1.07 | 1.00 | 1.03 | 1.06 | 1.12 | 147  | 16.5  | 9.64 |      |     |      |      |
| Q9Y2J4 | Angiomotin-like protein 2 OS=Homo sapiens GN=AMOTL2 PE=1 SV=3 - [AMOL2_HUMAN]                                                        | 1.80  | 1 | 1  | 1  | 1  | 0.82 | 0.82 | 0.83 | 0.83 |      |      |      |      | 779  | 85.7  | 7.30 |      |     |      |      |
| Q15389 | Angiopoietin-1 OS=Homo sapiens GN=ANGPT1 PE=1 SV=2 - [ANGP1_HUMAN]                                                                   | 7.23  | 2 | 3  | 3  | 3  | 2.87 | 0.77 | 1.35 | 0.36 | 1.33 | 1.00 | 1.43 | 0.99 | 498  | 57.5  | 6.76 |      |     |      |      |
| Q02763 | Angiopoietin-1 receptor OS=Homo sapiens GN=TEK PE=1 SV=2 - [TIE2_HUMAN]                                                              | 2.14  | 1 | 2  | 2  | 3  |      |      |      |      | 0.71 | 0.89 | 1.25 | 1.57 | 1124 | 125.7 | 6.89 |      |     |      |      |
| O15123 | Angiopoietin-2 OS=Homo sapiens GN=ANGPT2 PE=1 SV=1 - [ANGP2_HUMAN]                                                                   | 6.05  | 1 | 2  | 2  | 5  | 1.18 | 1.18 | 1.19 | 1.20 |      |      |      |      | 496  | 56.9  | 5.58 |      |     |      |      |
| Q9Y264 | Angiopoietin-4 OS=Homo sapiens GN=ANGPT4 PE=1 SV=1 - [ANGP4_HUMAN]                                                                   | 2.19  | 1 | 1  | 1  | 1  | 0.98 | 1.36 | 0.88 | 1.22 |      |      |      |      | 503  | 56.8  | 8.91 |      |     |      |      |
| Q9Y5C1 | Angiopoietin-related protein 3 OS=Homo sapiens GN=ANGPTL3 PE=1 SV=1 - [ANGL3_HUMAN]                                                  | 8.48  | 1 | 4  | 4  | 13 | 1.32 | 1.48 | 1.28 | 1.32 | 1.04 | 1.01 | 1.08 | 1.04 | 460  | 53.6  | 6.70 |      |     |      |      |
| Q9BY76 | Angiopoietin-related protein 4 OS=Homo sapiens GN=ANGPTL4 PE=1 SV=2 - [ANGL4_HUMAN]                                                  | 4.93  | 1 | 1  | 1  | 1  |      |      |      |      | 0.86 | 0.80 | 0.92 | 0.86 | 406  | 45.2  | 8.85 |      |     |      |      |
| Q8NI99 | Angiopoietin-related protein 6 OS=Homo sapiens GN=ANGPTL6 PE=1 SV=1 - [ANGL6_HUMAN]                                                  | 9.79  | 1 | 2  | 2  | 2  | 0.64 | 0.57 |      |      |      |      |      |      | 470  | 51.7  | 8.53 |      |     |      |      |
| Q9BYF1 | Angiotensin-converting enzyme 2 OS=Homo sapiens GN=ACE2 PE=1 SV=2 - [ACE2_HUMAN]                                                     | 1.99  | 1 | 1  | 1  | 2  |      |      |      |      | 0.47 | 0.85 | 0.59 | 1.05 | 805  | 92.4  | 5.54 |      |     |      |      |
| P12821 | Angiotensin-converting enzyme OS=Homo sapiens GN=ACE PE=1 SV=1 - [ACE_HUMAN]                                                         | 1.76  | 2 | 3  | 3  | 4  | 0.98 | 0.92 | 1.01 | 0.95 |      |      |      |      | 1306 | 149.6 | 6.39 |      |     |      |      |

|        |                                                                                                                         |       |   |    |    |     |      |      |      |      |      |      |      |      |      |       |      |
|--------|-------------------------------------------------------------------------------------------------------------------------|-------|---|----|----|-----|------|------|------|------|------|------|------|------|------|-------|------|
| P01019 | Angiotensinogen OS=Homo sapiens GN=AGT PE=1 SV=1 - [ANGT_HUMAN]                                                         | 45.36 | 1 | 20 | 20 | 614 | 1.26 | 1.37 | 1.28 | 1.38 | 1.20 | 1.31 | 1.13 | 1.24 | 485  | 53.1  | 6.32 |
| Q96Q91 | Anion exchange protein 4 OS=Homo sapiens GN=SLC4A9 PE=1 SV=2 - [B3A4_HUMAN]                                             | 1.63  | 1 | 1  | 1  | 1   | 1.80 | 1.75 | 1.85 | 1.80 |      |      |      |      | 983  | 108.2 | 7.09 |
| Q7Z5J8 | Ankyrin and armadillo repeat-containing protein OS=Homo sapiens GN=ANKAR PE=2 SV=3 - [ANKAR_HUMAN]                      | 3.42  | 1 | 2  | 3  | 3   | 0.93 | 0.94 | 0.94 | 0.96 |      |      |      |      | 1434 | 161.9 | 8.10 |
| Q8N961 | Ankyrin repeat and BTB/POZ domain-containing protein 2 OS=Homo sapiens GN=ABTB2 PE=2 SV=1 - [ABTB2_HUMAN]               | 1.31  | 1 | 1  | 1  | 2   | 0.69 | 0.74 | 0.63 | 0.67 |      |      |      |      | 839  | 93.2  | 5.90 |
| A6QL63 | Ankyrin repeat and BTB/POZ domain-containing protein BTBD11 OS=Homo sapiens GN=BTBD11 PE=2 SV=3 - [BTBDB_HUMAN]         | 2.45  | 1 | 2  | 2  | 4   | 1.19 | 1.09 | 1.09 | 1.01 | 1.00 | 1.21 | 2.51 | 3.02 | 1104 | 120.8 | 6.83 |
| Q9P2G1 | Ankyrin repeat and IBR domain-containing protein 1 OS=Homo sapiens GN=ANKIB1 PE=1 SV=3 - [AKIB1_HUMAN]                  | 1.84  | 1 | 1  | 1  | 1   | 1.45 | 1.81 | 0.88 | 1.11 |      |      |      |      | 1089 | 121.9 | 5.11 |
| Q8IWZ3 | Ankyrin repeat and KH domain-containing protein 1 OS=Homo sapiens GN=ANKHD1 PE=1 SV=1 - [ANKH1_HUMAN]                   | 2.71  | 1 | 3  | 3  | 6   | 1.52 | 0.99 | 1.62 | 1.07 | 1.12 | 1.13 | 0.99 | 1.00 | 2542 | 269.3 | 5.73 |
| Q9P2S6 | Ankyrin repeat and MYND domain-containing protein 1 OS=Homo sapiens GN=ANKMY1 PE=2 SV=2 - [ANKY1_HUMAN]                 | 1.06  | 1 | 1  | 1  | 1   | 1.04 | 1.16 | 1.13 | 1.27 |      |      |      |      | 941  | 105.4 | 6.73 |
| Q8IV38 | Ankyrin repeat and MYND domain-containing protein 2 OS=Homo sapiens GN=ANKMY2 PE=1 SV=1 - [ANKY2_HUMAN]                 | 10.43 | 1 | 2  | 3  | 18  | 1.33 | 1.27 | 1.22 | 1.32 |      |      |      |      | 441  | 49.3  | 6.25 |
| Q8NFD2 | Ankyrin repeat and protein kinase domain-containing protein 1 OS=Homo sapiens GN=ANKK1 PE=1 SV=1 - [ANKK1_HUMAN]        | 6.01  | 1 | 2  | 2  | 3   | 0.80 | 0.97 | 0.72 | 0.85 |      |      |      |      | 765  | 84.6  | 7.08 |
| Q92625 | Ankyrin repeat and SAM domain-containing protein 1A OS=Homo sapiens GN=ANKS1A PE=1 SV=4 - [ANS1A_HUMAN]                 | 2.20  | 1 | 2  | 2  | 3   |      |      |      |      | 1.11 | 1.21 | 1.20 | 1.28 | 1134 | 123.0 | 6.38 |
| Q6ZW76 | Ankyrin repeat and SAM domain-containing protein 3 OS=Homo sapiens GN=ANKS3 PE=1 SV=1 - [ANKS3_HUMAN]                   | 3.20  | 1 | 2  | 2  | 2   | 1.17 | 1.19 | 1.07 | 1.10 | 0.48 | 0.65 | 0.56 | 0.76 | 656  | 72.0  | 5.45 |
| Q8WXI3 | Ankyrin repeat and SOCS box protein 10 OS=Homo sapiens GN=ASB10 PE=2 SV=2 - [ASB10_HUMAN]                               | 2.78  | 1 | 1  | 1  | 2   | 0.77 | 0.82 | 0.90 | 0.97 |      |      |      |      | 467  | 50.9  | 7.01 |
| Q8WXK3 | Ankyrin repeat and SOCS box protein 13 OS=Homo sapiens GN=ASB13 PE=1 SV=2 - [ASB13_HUMAN]                               | 3.96  | 1 | 1  | 1  | 3   |      |      |      |      | 0.72 | 0.86 | 0.62 | 0.73 | 278  | 30.0  | 6.81 |
| A6NK59 | Ankyrin repeat and SOCS box protein 14 OS=Homo sapiens GN=ASB14 PE=2 SV=2 - [ASB14_HUMAN]                               | 3.75  | 1 | 1  | 1  | 2   | 0.86 | 1.05 | 1.02 | 1.25 |      |      |      |      | 587  | 65.3  | 6.71 |
| Q6ZVZ8 | Ankyrin repeat and SOCS box protein 18 OS=Homo sapiens GN=ASB18 PE=2 SV=2 - [ASB18_HUMAN]                               | 8.15  | 1 | 2  | 2  | 2   | 0.71 | 0.67 | 0.83 | 0.80 |      |      |      |      | 466  | 50.8  | 6.96 |
| Q96Q27 | Ankyrin repeat and SOCS box protein 2 OS=Homo sapiens GN=ASB2 PE=1 SV=1 - [ASB2_HUMAN]                                  | 1.87  | 1 | 1  | 1  | 1   | 1.03 | 0.79 | 1.09 | 0.84 |      |      |      |      | 587  | 65.0  | 7.62 |
| Q9H672 | Ankyrin repeat and SOCS box protein 7 OS=Homo sapiens GN=ASB7 PE=1 SV=2 - [ASB7_HUMAN]                                  | 1.89  | 1 | 1  | 1  | 1   | 1.30 | 1.12 | 1.22 | 1.06 |      |      |      |      | 318  | 36.0  | 8.29 |
| Q9H765 | Ankyrin repeat and SOCS box protein 8 OS=Homo sapiens GN=ASB8 PE=2 SV=1 - [ASB8_HUMAN]                                  | 5.90  | 1 | 1  | 1  | 1   | 1.32 | 1.43 | 1.02 | 1.11 |      |      |      |      | 288  | 31.6  | 5.83 |
| Q7Z6G8 | Ankyrin repeat and sterile alpha motif domain-containing protein 1B OS=Homo sapiens GN=ANKS1B PE=1 SV=2 - [ANS1B_HUMAN] | 0.80  | 1 | 1  | 1  | 2   |      |      |      |      | 1.16 | 1.31 | 1.21 | 1.37 | 1248 | 138.0 | 6.37 |
| Q9H8Y5 | Ankyrin repeat and zinc finger domain-containing protein 1 OS=Homo sapiens GN=ANKZF1 PE=1 SV=1 - [ANKZ1_HUMAN]          | 6.89  | 1 | 2  | 2  | 9   | 0.20 | 0.23 | 0.27 | 0.30 |      |      |      |      | 726  | 80.9  | 8.41 |
| Q6UB98 | Ankyrin repeat domain-containing protein 12 OS=Homo sapiens GN=ANKRD12 PE=1 SV=3 - [ANR12_HUMAN]                        | 1.21  | 1 | 1  | 1  | 2   | 1.07 | 0.55 | 1.15 | 0.59 |      |      |      |      | 2062 | 235.5 | 7.01 |
| Q8IZ07 | Ankyrin repeat domain-containing protein 13A OS=Homo sapiens GN=ANKRD13A PE=1 SV=3 - [AN13A_HUMAN]                      | 4.58  | 1 | 1  | 2  | 3   |      |      |      |      | 0.43 | 0.66 | 1.02 | 1.57 | 590  | 67.6  | 5.02 |
| Q86YJ7 | Ankyrin repeat domain-containing protein 13B OS=Homo sapiens GN=ANKRD13B PE=2 SV=4 - [AN13B_HUMAN]                      | 2.72  | 1 | 1  | 1  | 2   |      |      |      |      | 1.01 | 1.12 | 1.00 | 1.11 | 626  | 70.2  | 6.93 |
| Q6ZTN6 | Ankyrin repeat domain-containing protein 13D OS=Homo sapiens GN=ANKRD13D PE=1 SV=2 - [AN13D_HUMAN]                      | 5.02  | 1 | 1  | 2  | 2   |      |      |      |      | 0.92 | 0.90 | 0.92 | 0.90 | 518  | 58.4  | 5.38 |
| Q6P6B7 | Ankyrin repeat domain-containing protein 16 OS=Homo sapiens GN=ANKRD16 PE=2 SV=1 - [ANR16_HUMAN]                        | 15.51 | 1 | 4  | 4  | 18  | 0.87 | 0.80 | 0.89 | 0.83 | 0.55 | 0.49 | 0.54 | 0.65 | 361  | 39.3  | 7.25 |
| O75179 | Ankyrin repeat domain-containing protein 17 OS=Homo sapiens GN=ANKRD17 PE=1 SV=3 - [ANR17_HUMAN]                        | 0.50  | 1 | 1  | 1  | 3   | 0.66 | 0.76 | 0.69 | 0.81 |      |      |      |      | 2603 | 274.1 | 6.52 |

|        |                                                                                                                           |       |    |   |   |    |      |      |      |      |      |      |      |      |      |       |      |     |       |      |
|--------|---------------------------------------------------------------------------------------------------------------------------|-------|----|---|---|----|------|------|------|------|------|------|------|------|------|-------|------|-----|-------|------|
| Q81VF6 | Ankyrin repeat domain-containing protein 18A OS=Homo sapiens GN=ANKRD18A PE=1 SV=3 - [AN18A_HUMAN]                        | 0.71  | 1  | 1 | 1 | 1  | 1.36 | 1.64 | 1.38 | 1.68 |      |      |      |      |      |       |      | 992 | 115.5 | 7.83 |
| Q9GZV1 | Ankyrin repeat domain-containing protein 2 OS=Homo sapiens GN=ANKRD2 PE=1 SV=3 - [ANKR2_HUMAN]                            | 3.33  | 1  | 1 | 1 | 2  | 0.61 | 0.51 | 0.62 | 0.52 |      |      |      |      |      |       |      | 360 | 39.8  | 6.09 |
| Q5SQ80 | Ankyrin repeat domain-containing protein 20A2 OS=Homo sapiens GN=ANKRD20A2 PE=2 SV=1 - [A20A2_HUMAN]                      | 4.01  | 5  | 2 | 3 | 4  |      |      |      |      | 2.16 | 1.94 | 1.91 | 1.71 | 823  | 94.0  | 7.94 |     |       |      |
| Q5CZ79 | Ankyrin repeat domain-containing protein 20B OS=Homo sapiens GN=ANKRD20A8P PE=2 SV=2 - [AN20B_HUMAN]                      | 2.31  | 2  | 1 | 2 | 3  | 2.14 | 1.87 | 1.77 | 1.55 |      |      |      |      | 823  | 93.9  | 8.32 |     |       |      |
| Q8TF21 | Ankyrin repeat domain-containing protein 24 OS=Homo sapiens GN=ANKRD24 PE=2 SV=2 - [ANR24_HUMAN]                          | 2.79  | 1  | 2 | 2 | 2  | 0.97 | 0.92 | 0.96 | 0.92 |      |      |      |      | 1146 | 124.1 | 5.01 |     |       |      |
| Q9UPS8 | Ankyrin repeat domain-containing protein 26 OS=Homo sapiens GN=ANKRD26 PE=1 SV=3 - [ANR26_HUMAN]                          | 2.87  | 7  | 4 | 5 | 5  | 0.61 | 0.33 | 0.98 | 0.54 | 0.67 | 0.54 | 0.89 | 0.71 | 1709 | 196.2 | 5.72 |     |       |      |
| Q9BXX3 | Ankyrin repeat domain-containing protein 30A OS=Homo sapiens GN=ANKRD30A PE=1 SV=3 - [AN30A_HUMAN]                        | 0.64  | 1  | 1 | 1 | 2  |      |      |      |      | 0.92 | 1.04 | 0.91 | 1.02 | 1397 | 158.7 | 6.48 |     |       |      |
| Q9BXX2 | Ankyrin repeat domain-containing protein 30B OS=Homo sapiens GN=ANKRD30B PE=2 SV=3 - [AN30B_HUMAN]                        | 1.51  | 1  | 1 | 2 | 2  | 1.66 | 1.57 | 1.38 | 1.33 |      |      |      |      | 1392 | 157.9 | 6.35 |     |       |      |
| A5PLL1 | Ankyrin repeat domain-containing protein 34B OS=Homo sapiens GN=ANKRD34B PE=2 SV=3 - [AN34B_HUMAN]                        | 0.97  | 1  | 1 | 1 | 2  |      |      |      |      | 0.79 | 0.98 | 0.77 | 0.94 | 514  | 56.4  | 7.71 |     |       |      |
| Q8N2N9 | Ankyrin repeat domain-containing protein 36B OS=Homo sapiens GN=ANKRD36B PE=2 SV=4 - [AN36B_HUMAN]                        | 1.63  | 3  | 2 | 2 | 4  | 6.27 | 5.65 | 5.94 | 5.44 | 1.63 |      |      |      | 1353 | 153.5 | 8.85 |     |       |      |
| Q6AI12 | Ankyrin repeat domain-containing protein 40 OS=Homo sapiens GN=ANKRD40 PE=1 SV=2 - [ANR40_HUMAN]                          | 4.08  | 1  | 1 | 1 | 1  | 1.15 | 1.20 | 1.24 | 1.31 |      |      |      |      | 368  | 41.1  | 4.97 |     |       |      |
| Q8N9B4 | Ankyrin repeat domain-containing protein 42 OS=Homo sapiens GN=ANKRD42 PE=2 SV=2 - [ANR42_HUMAN]                          | 3.60  | 1  | 1 | 1 | 1  |      |      |      |      | 1.76 | 1.36 | 0.96 | 0.74 | 389  | 43.0  | 6.48 |     |       |      |
| Q9NU02 | Ankyrin repeat domain-containing protein 5 OS=Homo sapiens GN=ANKRD5 PE=2 SV=2 - [ANKR5_HUMAN]                            | 1.42  | 1  | 1 | 1 | 2  | 1.02 | 1.02 | 1.18 | 1.18 |      |      |      |      | 776  | 86.6  | 8.28 |     |       |      |
| A6NEL2 | Ankyrin repeat domain-containing protein SOWAHB OS=Homo sapiens GN=SOWAHB PE=2 SV=1 - [SWAHB_HUMAN]                       | 2.90  | 1  | 1 | 1 | 1  |      |      |      |      | 0.66 | 0.79 | 0.65 | 0.77 | 793  | 85.7  | 9.60 |     |       |      |
| Q9H9E1 | Ankyrin repeat family A protein 2 OS=Homo sapiens GN=ANKRA2 PE=1 SV=1 - [ANRA2_HUMAN]                                     | 7.03  | 1  | 1 | 1 | 1  | 0.78 | 0.49 | 0.51 | 0.33 |      |      |      |      | 313  | 34.2  | 5.11 |     |       |      |
| Q8WWH4 | Ankyrin repeat, SAM and basic leucine zipper domain-containing protein 1 OS=Homo sapiens GN=ASZ1 PE=2 SV=1 - [ASZ1_HUMAN] | 6.32  | 1  | 2 | 2 | 2  | 1.08 | 0.48 | 0.87 | 0.39 |      |      |      |      | 475  | 53.4  | 5.87 |     |       |      |
| P16157 | Ankyrin-1 OS=Homo sapiens GN=ANK1 PE=1 SV=3 - [ANK1_HUMAN]                                                                | 1.06  | 1  | 2 | 2 | 2  |      |      |      |      | 1.30 | 0.83 | 0.97 | 0.36 | 1881 | 206.1 | 6.01 |     |       |      |
| Q01484 | Ankyrin-2 OS=Homo sapiens GN=ANK2 PE=1 SV=4 - [ANK2_HUMAN]                                                                | 2.68  | 13 | 6 | 7 | 17 | 1.34 | 1.19 | 1.14 | 1.05 | 1.02 | 1.15 | 0.99 | 0.92 | 3957 | 433.4 | 5.14 |     |       |      |
| Q12955 | Ankyrin-3 OS=Homo sapiens GN=ANK3 PE=1 SV=3 - [ANK3_HUMAN]                                                                | 1.14  | 1  | 3 | 3 | 4  | 1.37 | 1.32 | 1.19 | 1.15 | 1.41 | 1.41 | 1.31 | 1.32 | 4377 | 480.1 | 6.49 |     |       |      |
| P04083 | Annexin A1 OS=Homo sapiens GN=ANXA1 PE=1 SV=2 - [ANXA1_HUMAN]                                                             | 13.01 | 1  | 3 | 3 | 6  |      |      |      |      | 0.83 | 0.83 | 0.83 | 0.83 | 346  | 38.7  | 7.02 |     |       |      |
| Q9UJ72 | Annexin A10 OS=Homo sapiens GN=ANXA10 PE=1 SV=3 - [ANX10_HUMAN]                                                           | 4.32  | 1  | 1 | 1 | 4  | 0.91 | 0.92 | 0.83 | 0.84 |      |      |      |      | 324  | 37.3  | 5.33 |     |       |      |
| P50995 | Annexin A11 OS=Homo sapiens GN=ANXA11 PE=1 SV=1 - [ANX11_HUMAN]                                                           | 1.78  | 1  | 1 | 1 | 2  | 1.29 | 1.13 | 1.26 | 1.11 |      |      |      |      | 505  | 54.4  | 7.65 |     |       |      |
| P12429 | Annexin A3 OS=Homo sapiens GN=ANXA3 PE=1 SV=3 - [ANXA3_HUMAN]                                                             | 4.95  | 1  | 1 | 1 | 2  | 1.42 | 1.56 | 0.91 | 1.01 |      |      |      |      | 323  | 36.4  | 5.92 |     |       |      |
| P08133 | Annexin A6 OS=Homo sapiens GN=ANXA6 PE=1 SV=3 - [ANXA6_HUMAN]                                                             | 2.38  | 1  | 1 | 1 | 2  | 1.08 | 0.85 | 1.06 | 0.84 |      |      |      |      | 673  | 75.8  | 5.60 |     |       |      |
| P20073 | Annexin A7 OS=Homo sapiens GN=ANXA7 PE=1 SV=3 - [ANXA7_HUMAN]                                                             | 5.33  | 1  | 2 | 2 | 2  | 0.86 | 0.87 | 0.89 | 0.91 |      |      |      |      | 488  | 52.7  | 5.68 |     |       |      |
| P13928 | Annexin A8 OS=Homo sapiens GN=ANXA8 PE=1 SV=3 - [ANXA8_HUMAN]                                                             | 3.36  | 3  | 1 | 1 | 1  |      |      |      |      | 1.17 | 0.83 | 1.14 | 0.80 | 327  | 36.9  | 5.78 |     |       |      |
| Q3ZCQ2 | Annexin-2 receptor OS=Homo sapiens GN=ANXA2R PE=2 SV=2 - [AX2R_HUMAN]                                                     | 15.03 | 1  | 2 | 2 | 3  | 1.10 | 1.04 | 1.18 | 1.12 | 0.47 | 0.51 | 0.45 | 0.49 | 193  | 21.7  | 4.97 |     |       |      |

|        |                                                                                             |       |   |     |     |       |      |      |      |      |      |      |       |      |      |       |      |
|--------|---------------------------------------------------------------------------------------------|-------|---|-----|-----|-------|------|------|------|------|------|------|-------|------|------|-------|------|
| Q5XXA6 | Anoctamin-1 OS=Homo sapiens GN=ANO1 PE=1 SV=1 - [ANO1_HUMAN]                                | 1.12  | 1 | 1   | 1   | 1     | 0.85 | 0.91 | 1.34 | 1.43 |      | 986  | 114.0 | 8.54 |      |       |      |
| Q9NW15 | Anoctamin-10 OS=Homo sapiens GN=ANO10 PE=1 SV=2 - [ANO10_HUMAN]                             | 1.82  | 1 | 1   | 1   | 1     |      |      |      |      | 0.95 | 0.95 | 0.93  | 0.93 | 660  | 76.3  | 7.40 |
| Q9NQ90 | Anoctamin-2 OS=Homo sapiens GN=ANO2 PE=1 SV=2 - [ANO2_HUMAN]                                | 3.19  | 1 | 2   | 2   | 2     | 0.93 | 1.18 | 1.00 | 1.27 | 0.20 | 0.11 | 0.67  | 0.35 | 1003 | 113.9 | 6.55 |
| Q4KMQ2 | Anoctamin-6 OS=Homo sapiens GN=ANO6 PE=1 SV=2 - [ANO6_HUMAN]                                | 2.20  | 1 | 1   | 1   | 2     | 1.03 | 0.78 | 0.88 | 0.67 |      |      |       |      | 910  | 106.1 | 7.77 |
| Q6IWH7 | Anoctamin-7 OS=Homo sapiens GN=ANO7 PE=1 SV=2 - [ANO7_HUMAN]                                | 1.39  | 1 | 1   | 1   | 1     |      |      |      |      | 0.86 | 0.69 | 0.87  | 0.69 | 933  | 105.5 | 7.87 |
| Q9H6X2 | Anthrax toxin receptor 1 OS=Homo sapiens GN=ANTXR1 PE=1 SV=2 - [ANTR1_HUMAN]                | 2.30  | 1 | 1   | 1   | 3     | 0.85 | 0.79 | 0.95 | 0.93 |      |      |       |      | 564  | 62.7  | 7.61 |
| P58335 | Anthrax toxin receptor 2 OS=Homo sapiens GN=ANTXR2 PE=1 SV=5 - [ANTR2_HUMAN]                | 4.70  | 1 | 3   | 3   | 4     | 0.70 | 1.14 | 0.84 | 1.21 |      |      |       |      | 489  | 53.6  | 7.46 |
| P46013 | Antigen KI-67 OS=Homo sapiens GN=MKI67 PE=1 SV=2 - [KI67_HUMAN]                             | 1.63  | 1 | 3   | 3   | 3     | 0.22 | 0.29 | 0.30 | 0.38 | 0.82 | 0.71 | 1.25  | 1.08 | 3256 | 358.5 | 9.45 |
| Q03518 | Antigen peptide transporter 1 OS=Homo sapiens GN=TAP1 PE=1 SV=2 - [TAP1_HUMAN]              | 2.10  | 1 | 1   | 1   | 1     |      |      |      |      | 0.32 | 0.24 | 0.94  | 0.69 | 808  | 87.2  | 8.02 |
| P03973 | Antileukoproteinase OS=Homo sapiens GN=SLPI PE=1 SV=2 - [SLPI_HUMAN]                        | 27.27 | 1 | 4   | 4   | 7     |      |      |      |      | 1.17 | 1.17 | 1.27  | 1.26 | 132  | 14.3  | 8.75 |
| P01008 | Antithrombin-III OS=Homo sapiens GN=SERPINC1 PE=1 SV=1 - [ANT3_HUMAN]                       | 65.95 | 1 | 44  | 44  | 3122  | 1.14 | 1.05 | 1.15 | 1.06 | 0.96 | 1.00 | 0.92  | 0.99 | 464  | 52.6  | 6.71 |
| P56377 | AP-1 complex subunit sigma-2 OS=Homo sapiens GN=AP1S2 PE=1 SV=1 - [AP1S2_HUMAN]             | 15.92 | 1 | 2   | 2   | 2     |      |      |      |      | 0.33 | 0.37 | 0.26  | 0.29 | 157  | 18.6  | 5.47 |
| O00203 | AP-3 complex subunit beta-1 OS=Homo sapiens GN=AP3B1 PE=1 SV=3 - [AP3B1_HUMAN]              | 0.64  | 1 | 1   | 1   | 1     |      |      |      |      | 1.11 | 1.59 | 1.18  | 1.69 | 1094 | 121.2 | 6.04 |
| Q13367 | AP-3 complex subunit beta-2 OS=Homo sapiens GN=AP3B2 PE=1 SV=2 - [AP3B2_HUMAN]              | 0.83  | 1 | 1   | 1   | 1     | 0.71 | 0.13 | 0.60 | 0.11 |      |      |       |      | 1082 | 119.0 | 5.59 |
| O14617 | AP-3 complex subunit delta-1 OS=Homo sapiens GN=AP3D1 PE=1 SV=1 - [AP3D1_HUMAN]             | 0.95  | 1 | 1   | 1   | 1     |      |      |      |      | 1.31 | 1.27 | 0.95  | 0.93 | 1153 | 130.1 | 8.48 |
| Q96N21 | AP-4 complex accessory subunit tepsin OS=Homo sapiens GN=C17orf56 PE=1 SV=1 - [AP4AT_HUMAN] | 6.48  | 1 | 1   | 1   | 1     | 1.57 | 1.49 | 1.49 | 1.41 |      |      |       |      | 525  | 55.1  | 7.03 |
| Q9Y6B7 | AP-4 complex subunit beta-1 OS=Homo sapiens GN=AP4B1 PE=2 SV=2 - [AP4B1_HUMAN]              | 2.57  | 1 | 1   | 1   | 1     |      |      |      |      | 0.83 |      | 0.46  |      | 739  | 83.2  | 5.86 |
| Q9UPM8 | AP-4 complex subunit epsilon-1 OS=Homo sapiens GN=AP4E1 PE=1 SV=2 - [AP4E1_HUMAN]           | 0.53  | 1 | 1   | 1   | 1     | 0.67 | 0.64 | 0.76 | 0.72 |      |      |       |      | 1137 | 127.2 | 5.99 |
| Q2M2I8 | AP2-associated protein kinase 1 OS=Homo sapiens GN=AAK1 PE=1 SV=3 - [AAK1_HUMAN]            | 1.35  | 1 | 1   | 1   | 1     | 0.77 | 1.00 | 0.94 | 1.25 |      |      |       |      | 961  | 103.8 | 6.60 |
| Q8N7J2 | APC membrane recruitment protein 2 OS=Homo sapiens GN=FAM123A PE=1 SV=3 - [AMER2_HUMAN]     | 2.38  | 1 | 1   | 1   | 1     | 1.20 | 1.09 | 1.07 | 0.98 |      |      |       |      | 671  | 69.5  | 6.99 |
| Q8N944 | APC membrane recruitment protein 3 OS=Homo sapiens GN=FAM123C PE=2 SV=2 - [AMER3_HUMAN]     | 6.27  | 1 | 2   | 2   | 4     |      |      |      |      | 1.58 | 1.39 | 0.93  | 1.10 | 861  | 90.4  | 5.69 |
| P02647 | Apolipoprotein A-I OS=Homo sapiens GN=APOA1 PE=1 SV=1 - [APOA1_HUMAN]                       | 90.64 | 9 | 47  | 50  | 7470  | 0.84 | 0.78 | 0.85 | 0.79 | 0.98 | 0.95 | 0.98  | 0.96 | 267  | 30.8  | 5.76 |
| P02652 | Apolipoprotein A-II OS=Homo sapiens GN=APOA2 PE=1 SV=1 - [APOA2_HUMAN]                      | 77.00 | 2 | 11  | 12  | 1459  | 0.81 | 0.80 | 0.83 | 0.80 | 1.67 | 1.72 | 1.62  | 1.76 | 100  | 11.2  | 6.62 |
| P06727 | Apolipoprotein A-IV OS=Homo sapiens GN=APOA4 PE=1 SV=3 - [APOA4_HUMAN]                      | 83.08 | 2 | 32  | 32  | 761   | 0.85 | 0.81 | 0.88 | 0.84 | 0.79 | 0.73 | 0.80  | 0.75 | 396  | 45.4  | 5.38 |
| P04114 | Apolipoprotein B-100 OS=Homo sapiens GN=APOB PE=1 SV=2 - [APOB_HUMAN]                       | 70.46 | 7 | 341 | 343 | 11580 | 1.18 | 1.21 | 1.17 | 1.22 | 1.05 | 1.10 | 0.99  | 1.03 | 4563 | 515.3 | 7.05 |
| P02654 | Apolipoprotein C-I OS=Homo sapiens GN=APOC1 PE=1 SV=1 - [APOC1_HUMAN]                       | 48.19 | 1 | 10  | 10  | 939   | 0.46 | 0.48 | 0.43 | 0.47 | 3.31 | 3.35 | 2.87  | 2.91 | 83   | 9.3   | 8.47 |
| P02655 | Apolipoprotein C-II OS=Homo sapiens GN=APOC2 PE=1 SV=1 - [APOC2_HUMAN]                      | 56.44 | 1 | 5   | 5   | 191   | 0.79 | 0.91 | 0.77 | 0.95 | 2.82 | 2.81 | 2.74  | 2.69 | 101  | 11.3  | 4.72 |

|        |                                                                                                                               |       |   |    |    |      |      |      |      |      |      |      |      |      |      |       |      |
|--------|-------------------------------------------------------------------------------------------------------------------------------|-------|---|----|----|------|------|------|------|------|------|------|------|------|------|-------|------|
| P02656 | Apolipoprotein C-III OS=Homo sapiens GN=APOC3 PE=1 SV=1 - [APOC3_HUMAN]                                                       | 76.77 | 1 | 9  | 9  | 1425 | 0.82 | 0.72 | 0.82 | 0.69 | 1.66 | 1.58 | 1.67 | 1.49 | 99   | 10.8  | 5.41 |
| P55056 | Apolipoprotein C-IV OS=Homo sapiens GN=APOC4 PE=1 SV=1 - [APOC4_HUMAN]                                                        | 45.67 | 1 | 7  | 7  | 52   | 1.10 | 1.12 | 1.20 | 1.22 | 2.16 | 2.12 | 1.89 | 2.03 | 127  | 14.5  | 8.92 |
| P05090 | Apolipoprotein D OS=Homo sapiens GN=APOD PE=1 SV=1 - [APOD_HUMAN]                                                             | 51.85 | 1 | 12 | 12 | 699  | 1.16 | 1.08 | 1.15 | 1.08 | 1.19 | 1.24 | 1.15 | 1.19 | 189  | 21.3  | 5.15 |
| P02649 | Apolipoprotein E OS=Homo sapiens GN=APOE PE=1 SV=1 - [APOE_HUMAN]                                                             | 80.13 | 1 | 31 | 31 | 887  | 0.94 | 0.90 | 0.94 | 0.93 | 0.95 | 0.92 | 0.96 | 0.99 | 317  | 36.1  | 5.73 |
| Q13790 | Apolipoprotein F OS=Homo sapiens GN=APOF PE=1 SV=2 - [APOF_HUMAN]                                                             | 22.70 | 1 | 7  | 7  | 23   | 0.77 | 1.14 | 0.70 | 1.06 | 1.18 | 1.13 | 1.16 | 1.15 | 326  | 35.4  | 5.64 |
| O14791 | Apolipoprotein L1 OS=Homo sapiens GN=APOL1 PE=1 SV=5 [APOL1_HUMAN]                                                            | 45.23 | 1 | 22 | 22 | 289  | 0.90 | 0.82 | 0.86 | 0.83 | 0.97 | 0.96 | 1.04 | 0.94 | 398  | 43.9  | 5.81 |
| Q9BWW9 | Apolipoprotein L5 OS=Homo sapiens GN=APOL5 PE=1 SV=1 [APOL5_HUMAN]                                                            | 3.00  | 1 | 1  | 1  | 1    | 1.29 | 1.33 | 1.34 | 1.40 |      |      |      |      | 433  | 47.0  | 9.31 |
| O95445 | Apolipoprotein M OS=Homo sapiens GN=APOM PE=1 SV=2 - [APOM_HUMAN]                                                             | 78.19 | 1 | 15 | 15 | 251  | 1.03 | 1.00 | 1.05 | 1.05 | 1.26 | 1.23 | 1.21 | 1.22 | 188  | 21.2  | 6.01 |
| P08519 | Apolipoprotein(a) OS=Homo sapiens GN=LPA PE=1 SV=1 - [APOA_HUMAN]                                                             | 25.15 | 2 | 29 | 29 | 191  | 0.96 | 0.95 | 1.01 | 0.99 | 0.89 | 0.94 | 0.90 | 0.95 | 4548 | 501.0 | 5.88 |
| O95831 | Apoptosis-inducing factor 1, mitochondrial OS=Homo sapiens GN=AIFM1 PE=1 SV=1 - [AIFM1_HUMAN]                                 | 2.61  | 1 | 1  | 1  | 1    | 1.53 | 2.32 | 2.00 | 3.08 |      |      |      |      | 613  | 66.9  | 8.95 |
| Q9BRQ8 | Apoptosis-inducing factor 2 OS=Homo sapiens GN=AIFM2 PE=1 SV=1 - [AIFM2_HUMAN]                                                | 1.88  | 1 | 1  | 1  | 1    | 0.73 | 0.72 | 0.80 | 0.79 |      |      |      |      | 373  | 40.5  | 9.11 |
| Q96KQ4 | Apoptosis-stimulating of p53 protein 1 OS=Homo sapiens GN=PPP1R13B PE=1 SV=3 - [ASPP1_HUMAN]                                  | 1.38  | 1 | 1  | 1  | 1    | 2.13 | 1.62 | 2.51 | 1.91 |      |      |      |      | 1090 | 119.5 | 6.76 |
| O14727 | Apoptotic protease-activating factor 1 OS=Homo sapiens GN=APAF1 PE=1 SV=2 - [APAF_HUMAN]                                      | 1.92  | 8 | 1  | 3  | 3    |      |      |      |      | 0.85 | 1.30 | 0.91 | 1.38 | 1248 | 141.7 | 6.40 |
| Q8IW19 | Aprataxin and PNK-like factor OS=Homo sapiens GN=APLF PE=1 SV=1 - [APLF_HUMAN]                                                | 8.41  | 1 | 2  | 2  | 8    | 0.95 | 1.16 | 0.79 | 0.97 | 2.05 | 1.76 | 1.94 | 1.66 | 511  | 56.9  | 5.08 |
| P55087 | Aquaporin-4 OS=Homo sapiens GN=AQP4 PE=1 SV=2 - [AQP4_HUMAN]                                                                  | 3.10  | 1 | 1  | 1  | 1    |      |      |      |      | 0.13 | 0.10 | 7.00 | 5.40 | 323  | 34.8  | 7.66 |
| Q13520 | Aquaporin-6 OS=Homo sapiens GN=AQP6 PE=2 SV=2 - [AQP6_HUMAN]                                                                  | 5.32  | 1 | 1  | 1  | 1    |      |      |      |      | 0.82 | 0.58 | 0.64 | 0.45 | 282  | 29.4  | 8.66 |
| O75342 | Arachidonate 12-lipoxygenase, 12R-type OS=Homo sapiens GN=ALOX12B PE=1 SV=1 - [LX12B_HUMAN]                                   | 2.43  | 1 | 1  | 1  | 18   | 1.24 | 1.11 | 1.30 | 1.12 |      |      |      |      | 701  | 80.3  | 7.64 |
| O15296 | Arachidonate 15-lipoxygenase B OS=Homo sapiens GN=ALOX15B PE=2 SV=3 - [LX15B_HUMAN]                                           | 2.37  | 1 | 1  | 1  | 1    |      |      |      |      | 1.39 | 1.05 | 1.34 | 1.02 | 676  | 75.8  | 6.10 |
| P09917 | Arachidonate 5-lipoxygenase OS=Homo sapiens GN=ALOX5 PE=1 SV=2 - [LOX5_HUMAN]                                                 | 2.23  | 1 | 1  | 1  | 1    | 0.37 | 0.74 | 0.42 | 0.85 |      |      |      |      | 674  | 77.9  | 5.77 |
| Q15057 | Arf-GAP with coiled-coil, ANK repeat and PH domain-containing protein 2 OS=Homo sapiens GN=ACAP2 PE=1 SV=3 - [ACAP2_HUMAN]    | 2.70  | 2 | 2  | 2  | 6    | 0.77 | 0.74 | 0.66 | 0.69 | 0.77 | 0.89 | 0.77 | 0.89 | 778  | 88.0  | 6.80 |
| Q9UPQ3 | Arf-GAP with GTPase, ANK repeat and PH domain-containing protein 1 OS=Homo sapiens GN=AGAP1 PE=1 SV=4 - [AGAP1_HUMAN]         | 1.52  | 1 | 1  | 1  | 2    | 0.88 | 0.88 | 0.92 | 0.94 | 1.19 | 1.32 | 1.13 | 1.25 | 857  | 94.4  | 7.94 |
| Q8TF27 | Arf-GAP with GTPase, ANK repeat and PH domain-containing protein 11 OS=Homo sapiens GN=AGAP11 PE=2 SV=2 - [AGA11_HUMAN]       | 2.36  | 1 | 1  | 1  | 1    |      |      |      |      | 1.45 | 1.50 | 1.44 | 1.49 | 550  | 60.5  | 7.71 |
| Q99490 | Arf-GAP with GTPase, ANK repeat and PH domain-containing protein 2 OS=Homo sapiens GN=AGAP2 PE=1 SV=2 - [AGAP2_HUMAN]         | 1.68  | 1 | 1  | 1  | 2    |      |      |      |      | 0.88 | 0.89 | 0.87 | 0.88 | 1192 | 124.6 | 9.89 |
| Q5SRD3 | Arf-GAP with GTPase, ANK repeat and PH domain-containing protein 8 OS=Homo sapiens GN=AGAP8 PE=2 SV=1 - [AGAP8_HUMAN]         | 4.68  | 5 | 1  | 1  | 1    | 0.47 | 0.62 | 0.49 | 0.64 |      |      |      |      | 663  | 73.0  | 6.79 |
| Q96P48 | Arf-GAP with Rho-GAP domain, ANK repeat and PH domain-containing protein 1 OS=Homo sapiens GN=ARAP1 PE=1 SV=3 - [ARAP1_HUMAN] | 2.69  | 1 | 3  | 3  | 10   | 0.91 | 0.89 | 1.01 | 0.98 | 0.56 | 0.55 | 0.86 | 0.83 | 1450 | 162.1 | 6.23 |
| Q8TDY4 | Arf-GAP with SH3 domain, ANK repeat and PH domain-containing protein 3 OS=Homo sapiens GN=ASAP3 PE=1 SV=1 - [ASAP3_HUMAN]     | 5.20  | 1 | 2  | 2  | 3    | 0.80 | 0.69 | 1.03 | 0.88 |      |      |      |      | 903  | 99.1  | 6.40 |
| P53365 | Arfaptin-2 OS=Homo sapiens GN=ARFIP2 PE=1 SV=1 - [ARFP2_HUMAN]                                                                | 5.28  | 1 | 1  | 2  | 187  | 1.07 | 1.36 | 1.44 | 1.86 |      |      |      |      | 341  | 37.8  | 6.04 |

|        |                                                                                                            |       |   |   |   |    |      |      |      |      |      |      |      |      |      |       |       |
|--------|------------------------------------------------------------------------------------------------------------|-------|---|---|---|----|------|------|------|------|------|------|------|------|------|-------|-------|
| Q7L4I2 | Arginine/serine-rich coiled-coil protein 2 OS=Homo sapiens GN=RSRC2 PE=1 SV=1 - [RSRC2_HUMAN]              | 5.99  | 1 | 2 | 2 | 7  | 1.97 | 2.18 | 2.12 | 2.35 | 0.71 | 0.27 | 0.82 | 0.75 | 434  | 50.5  | 11.33 |
| Q9NVT9 | Armadillo repeat-containing protein 1 OS=Homo sapiens GN=ARMC1 PE=1 SV=1 - [ARMC1_HUMAN]                   | 13.48 | 1 | 1 | 1 | 1  | 0.98 | 1.46 | 0.66 | 1.00 |      |      |      |      | 282  | 31.3  | 5.74  |
| Q6NXE6 | Armadillo repeat-containing protein 6 OS=Homo sapiens GN=ARMC6 PE=1 SV=2 - [ARMC6_HUMAN]                   | 8.18  | 1 | 2 | 2 | 2  | 1.03 | 0.89 | 1.02 | 0.89 |      |      |      |      | 501  | 54.1  | 6.24  |
| Q9P291 | Armadillo repeat-containing X-linked protein 1 OS=Homo sapiens GN=ARMCX1 PE=1 SV=1 - [ARMCX1_HUMAN]        | 6.84  | 1 | 2 | 2 | 4  | 1.00 | 0.95 | 0.93 | 0.89 |      |      |      |      | 453  | 49.1  | 9.22  |
| Q5H9R4 | Armadillo repeat-containing X-linked protein 4 OS=Homo sapiens GN=ARMCX4 PE=2 SV=2 - [ARMCX4_HUMAN]        | 5.56  | 1 | 1 | 1 | 1  |      |      |      |      | 1.34 | 1.37 | 1.45 | 1.49 | 360  | 39.4  | 9.19  |
| P20711 | Aromatic-L-amino-acid decarboxylase OS=Homo sapiens GN=DDC PE=1 SV=2 - [DDC_HUMAN]                         | 3.33  | 1 | 1 | 1 | 1  | 1.25 | 1.73 | 1.04 | 1.43 |      |      |      |      | 480  | 53.9  | 7.20  |
| Q8TBH0 | Arrestin domain-containing protein 2 OS=Homo sapiens GN=ARRDC2 PE=2 SV=2 - [ARRDC2_HUMAN]                  | 8.85  | 1 | 1 | 1 | 1  | 0.62 | 0.62 | 0.72 | 0.74 |      |      |      |      | 407  | 44.4  | 9.20  |
| P36575 | Arrestin-C OS=Homo sapiens GN=ARR3 PE=1 SV=2 - [ARRC_HUMAN]                                                | 4.64  | 1 | 1 | 1 | 1  | 0.81 | 0.85 | 0.79 | 0.84 |      |      |      |      | 388  | 42.8  | 5.77  |
| Q9NZN9 | Aryl-hydrocarbon-interacting protein-like 1 OS=Homo sapiens GN=AIPL1 PE=1 SV=2 - [AIPL1_HUMAN]             | 5.99  | 2 | 1 | 2 | 4  | 0.76 | 0.71 | 0.73 | 0.69 |      |      |      |      | 384  | 43.9  | 5.95  |
| P51690 | Arylsulfatase E OS=Homo sapiens GN=ARSE PE=1 SV=2 - [ARSE_HUMAN]                                           | 2.55  | 1 | 1 | 1 | 1  |      |      |      |      | 1.26 | 1.22 | 1.37 | 1.32 | 589  | 65.6  | 6.96  |
| Q5FYB1 | Arylsulfatase I OS=Homo sapiens GN=ARSI PE=1 SV=1 - [ARSI_HUMAN]                                           | 1.05  | 1 | 1 | 1 | 3  | 0.69 | 0.65 | 0.73 | 0.67 |      |      |      |      | 569  | 64.0  | 8.62  |
| P07307 | Asialoglycoprotein receptor 2 OS=Homo sapiens GN=ASGR2 PE=1 SV=2 - [ASGR2_HUMAN]                           | 15.11 | 1 | 3 | 3 | 5  | 1.54 | 1.48 | 1.57 | 1.53 | 0.53 | 0.97 | 0.84 | 1.53 | 311  | 35.1  | 6.25  |
| P17174 | Aspartate aminotransferase, cytoplasmic OS=Homo sapiens GN=GOT1 PE=1 SV=3 - [AATC_HUMAN]                   | 9.69  | 7 | 3 | 4 | 11 | 0.83 | 0.80 | 0.84 | 0.76 |      |      |      |      | 413  | 46.2  | 7.01  |
| P00505 | Aspartate aminotransferase, mitochondrial OS=Homo sapiens GN=GOT2 PE=1 SV=3 - [ATM_HUMAN]                  | 4.19  | 1 | 1 | 1 | 1  |      |      |      |      | 1.99 | 1.84 | 1.66 | 1.53 | 430  | 47.5  | 9.01  |
| Q5U4P2 | Aspartate beta-hydroxylase domain-containing protein 1 OS=Homo sapiens GN=ASPHD1 PE=1 SV=3 - [ASPH1_HUMAN] | 17.95 | 1 | 2 | 2 | 16 | 1.05 | 0.95 | 0.96 | 0.88 | 0.73 | 0.68 | 1.06 | 0.98 | 390  | 41.1  | 8.56  |
| P14868 | Aspartate-tRNA ligase, cytoplasmic OS=Homo sapiens GN=DARS PE=1 SV=2 - [SYDC_HUMAN]                        | 6.19  | 1 | 2 | 2 | 4  | 1.44 | 1.42 | 1.41 | 1.39 | 1.30 | 1.40 | 1.32 | 1.42 | 501  | 57.1  | 6.55  |
| Q9ULA0 | Aspartyl aminopeptidase OS=Homo sapiens GN=DNPEP PE=1 SV=1 - [DNPEP_HUMAN]                                 | 3.37  | 1 | 1 | 1 | 1  | 0.85 | 0.96 | 0.90 | 1.03 |      |      |      |      | 475  | 52.4  | 7.42  |
| Q9BXN1 | Asporin OS=Homo sapiens GN=ASPN PE=1 SV=2 - [ASPN_HUMAN]                                                   | 2.89  | 1 | 1 | 1 | 1  | 0.80 | 0.97 | 0.94 | 1.15 |      |      |      |      | 380  | 43.4  | 7.08  |
| O75129 | Astrotactin-2 OS=Homo sapiens GN=ASTN2 PE=2 SV=2 - [ASTN2_HUMAN]                                           | 1.19  | 1 | 1 | 1 | 1  |      |      |      |      | 0.52 | 1.69 | 0.20 | 0.67 | 1339 | 148.1 | 5.97  |
| Q7Z591 | AT-hook-containing transcription factor OS=Homo sapiens GN=AKNA PE=1 SV=2 - [AKNA_HUMAN]                   | 2.78  | 1 | 2 | 2 | 5  | 1.29 | 1.26 | 1.29 | 1.25 |      |      |      |      | 1439 | 155.0 | 6.32  |
| O14497 | AT-rich interactive domain-containing protein 1A OS=Homo sapiens GN=ARID1A PE=1 SV=3 - [ARI1A_HUMAN]       | 0.44  | 1 | 1 | 1 | 2  |      |      |      |      | 0.73 | 0.87 | 0.67 | 0.80 | 2285 | 241.9 | 6.70  |
| Q8NFD5 | AT-rich interactive domain-containing protein 1B OS=Homo sapiens GN=ARID1B PE=1 SV=2 - [ARI1B_HUMAN]       | 3.09  | 1 | 2 | 2 | 3  | 0.81 | 0.85 | 0.73 | 0.76 |      |      |      |      | 2236 | 236.0 | 6.73  |
| Q68CP9 | AT-rich interactive domain-containing protein 2 OS=Homo sapiens GN=ARID2 PE=1 SV=2 - [ARID2_HUMAN]         | 1.14  | 1 | 1 | 1 | 1  |      |      |      |      | 1.18 | 1.34 | 0.99 | 1.12 | 1835 | 197.3 | 7.42  |
| Q99856 | AT-rich interactive domain-containing protein 3A OS=Homo sapiens GN=ARID3A PE=1 SV=2 - [ARI3A_HUMAN]       | 3.88  | 2 | 2 | 2 | 2  | 0.94 | 1.01 | 1.26 | 1.35 | 1.04 | 1.24 | 0.80 | 0.95 | 593  | 62.9  | 4.91  |
| P29374 | AT-rich interactive domain-containing protein 4A OS=Homo sapiens GN=ARID4A PE=1 SV=3 - [ARI4A_HUMAN]       | 2.47  | 1 | 2 | 2 | 11 | 1.00 | 1.20 | 1.11 | 1.30 |      |      |      |      | 1257 | 142.7 | 5.10  |
| Q14865 | AT-rich interactive domain-containing protein 5B OS=Homo sapiens GN=ARID5B PE=1 SV=3 - [ARI5B_HUMAN]       | 1.77  | 1 | 2 | 2 | 2  | 1.09 | 1.08 | 1.05 | 1.05 | 1.15 | 0.87 | 1.13 | 0.85 | 1188 | 132.3 | 8.72  |
| P0C7T5 | Ataxin-1-like OS=Homo sapiens GN=ATXN1L PE=1 SV=1 - [ATX1L_HUMAN]                                          | 7.69  | 1 | 2 | 2 | 2  | 1.15 | 1.15 | 1.17 | 1.16 | 1.05 | 0.94 | 1.01 | 0.90 | 689  | 73.3  | 6.60  |

|        |                                                                                                                          |      |   |   |   |    |      |      |      |      |      |      |      |      |      |       |      |      |      |       |       |       |      |
|--------|--------------------------------------------------------------------------------------------------------------------------|------|---|---|---|----|------|------|------|------|------|------|------|------|------|-------|------|------|------|-------|-------|-------|------|
| Q9UBB4 | Ataxin-10 OS=Homo sapiens GN=ATXN10 PE=1 SV=1 - [ATX10_HUMAN]                                                            | 3.16 | 1 | 1 | 1 | 5  |      |      |      |      |      |      |      |      | 1.07 | 1.20  | 1.09 | 1.22 | 475  | 53.5  | 5.25  |       |      |
| O15265 | Ataxin-7 OS=Homo sapiens GN=ATXN7 PE=1 SV=1 - [ATX7_HUMAN]                                                               | 5.94 | 1 | 2 | 2 | 3  | 0.92 | 0.83 | 1.00 | 0.90 | 1.28 | 1.23 | 1.39 | 1.34 | 892  | 95.4  | 9.85 |      |      |       |       |       |      |
| Q9ULK2 | Ataxin-7-like protein 1 OS=Homo sapiens GN=ATXN7L1 PE=2 SV=3 - [AT7L1_HUMAN]                                             | 1.86 | 1 | 2 | 2 | 2  | 0.85 | 0.75 | 1.15 | 1.02 | 1.02 | 1.86 | 0.87 | 1.59 | 861  | 91.5  | 9.79 |      |      |       |       |       |      |
| O95477 | ATP-binding cassette sub-family A member 1 OS=Homo sapiens GN=ABCA1 PE=1 SV=3 - [ABCA1_HUMAN]                            | 1.06 | 2 | 2 | 4 | 47 |      |      |      |      |      |      |      |      | 4.24 | 3.40  | 0.98 | 0.75 | 2261 | 254.1 | 6.86  |       |      |
| Q86UK0 | ATP-binding cassette sub-family A member 12 OS=Homo sapiens GN=ABCA12 PE=1 SV=3 - [ABCAC_HUMAN]                          | 1.43 | 1 | 1 | 2 | 4  |      |      |      |      |      |      |      |      | 0.87 | 0.55  | 0.87 | 0.78 | 2595 | 293.0 | 7.75  |       |      |
| Q86UQ4 | ATP-binding cassette sub-family A member 13 OS=Homo sapiens GN=ABCA13 PE=2 SV=3 - [ABCAD_HUMAN]                          | 0.69 | 1 | 2 | 2 | 2  |      |      |      |      |      |      |      |      | 1.52 | 2.02  | 1.33 | 1.78 | 5058 | 575.8 | 6.46  |       |      |
| Q8IZY2 | ATP-binding cassette sub-family A member 7 OS=Homo sapiens GN=ABCA7 PE=1 SV=3 - [ABCA7_HUMAN]                            | 0.79 | 1 | 1 | 1 | 3  | 0.55 | 0.57 | 0.41 | 0.44 | 0.60 | 0.60 | 0.74 | 0.74 | 2146 | 234.2 | 7.24 |      |      |       |       |       |      |
| O94911 | ATP-binding cassette sub-family A member 8 OS=Homo sapiens GN=ABCA8 PE=1 SV=3 - [ABCA8_HUMAN]                            | 0.82 | 7 | 1 | 2 | 6  |      |      |      |      |      |      |      |      | 0.16 | 3.82  | 0.35 | 8.41 | 1581 | 179.1 | 7.18  |       |      |
| Q8IU7  | ATP-binding cassette sub-family A member 9 OS=Homo sapiens GN=ABCA9 PE=1 SV=1 - [ABCA9_HUMAN]                            | 0.80 | 1 | 1 | 1 | 1  |      |      |      |      |      |      |      |      | 0.88 | 0.12  | 0.99 | 0.13 | 1624 | 184.2 | 6.93  |       |      |
| Q2M3G0 | ATP-binding cassette sub-family B member 5 OS=Homo sapiens GN=ABCB5 PE=1 SV=3 - [ABCB5_HUMAN]                            | 5.54 | 2 | 2 | 3 | 4  |      |      |      |      |      |      |      |      | 0.99 | 1.04  | 0.93 | 0.98 | 812  | 89.8  | 7.94  |       |      |
| O75027 | ATP-binding cassette sub-family B member 7, mitochondrial OS=Homo sapiens GN=ABCB7 PE=1 SV=2 - [ABCB7_HUMAN]             | 2.66 | 1 | 1 | 1 | 2  | 1.08 | 1.44 | 1.17 | 1.57 | 1.47 | 1.06 | 0.85 | 0.61 | 752  | 82.6  | 9.33 |      |      |       |       |       |      |
| Q9NP78 | ATP-binding cassette sub-family B member 9 OS=Homo sapiens GN=ABCB9 PE=1 SV=1 - [ABCB9_HUMAN]                            | 3.13 | 2 | 1 | 3 | 9  | 1.45 | 1.34 | 1.41 | 1.32 | 1.34 | 1.99 | 1.17 | 1.73 | 766  | 84.4  | 7.93 |      |      |       |       |       |      |
| Q96J66 | ATP-binding cassette sub-family C member 11 OS=Homo sapiens GN=ABCC11 PE=1 SV=1 - [ABCCB_HUMAN]                          | 1.01 | 1 | 1 | 1 | 1  | 1.02 | 1.43 | 0.68 | 0.96 |      |      |      |      |      |       |      |      | 1382 | 154.2 | 8.09  |       |      |
| O60706 | ATP-binding cassette sub-family C member 9 OS=Homo sapiens GN=ABCC9 PE=1 SV=2 - [ABCC9_HUMAN]                            | 3.03 | 4 | 3 | 3 | 6  | 1.73 | 1.26 | 1.29 | 1.02 |      |      |      |      |      |       |      |      | 1549 | 174.1 | 7.37  |       |      |
| P33897 | ATP-binding cassette sub-family D member 1 OS=Homo sapiens GN=ABCD1 PE=1 SV=2 - [ABCD1_HUMAN]                            | 2.68 | 1 | 1 | 1 | 1  | 0.18 | 0.56 | 0.27 | 0.83 |      |      |      |      |      |       |      |      | 745  | 82.9  | 8.95  |       |      |
| P28288 | ATP-binding cassette sub-family D member 3 OS=Homo sapiens GN=ABCD3 PE=1 SV=1 - [ABCD3_HUMAN]                            | 4.70 | 1 | 2 | 2 | 5  | 0.97 | 1.03 | 0.96 | 1.03 | 0.94 | 0.47 | 0.78 | 0.39 | 659  | 75.4  | 9.36 |      |      |       |       |       |      |
| P53396 | ATP-citrate synthase OS=Homo sapiens GN=ACLY PE=1 SV=3 - [ACLY_HUMAN]                                                    | 1.27 | 1 | 1 | 1 | 1  | 0.71 | 0.67 | 0.76 | 0.72 |      |      |      |      |      |       |      |      | 1101 | 120.8 | 7.33  |       |      |
| O76031 | ATP-dependent Clp protease ATP-binding subunit clpX-like, mitochondrial OS=Homo sapiens GN=CLPX PE=1 SV=2 - [CLPX_HUMAN] | 4.74 | 1 | 2 | 2 | 2  | 0.85 | 0.91 | 0.86 | 0.93 |      |      |      |      |      |       |      |      | 633  | 69.2  | 7.58  |       |      |
| Q9H611 | ATP-dependent DNA helicase PIF1 OS=Homo sapiens GN=PIF1 PE=1 SV=2 - [PIF1_HUMAN]                                         | 3.90 | 1 | 1 | 2 | 2  |      |      |      |      |      |      |      |      | 1.27 | 1.76  | 1.99 | 2.77 | 641  | 69.8  | 9.72  |       |      |
| O94761 | ATP-dependent DNA helicase Q4 OS=Homo sapiens GN=RECQL4 PE=1 SV=1 - [RECQ4_HUMAN]                                        | 0.99 | 1 | 1 | 1 | 1  |      |      |      |      |      |      |      |      | 1.55 | 2.34  |      |      | 1208 | 133.0 | 8.09  |       |      |
| O94762 | ATP-dependent DNA helicase Q5 OS=Homo sapiens GN=RECQL5 PE=1 SV=2 - [RECQ5_HUMAN]                                        | 1.21 | 1 | 1 | 1 | 1  |      |      |      |      |      |      |      |      |      |       |      |      | 0.97 | 0.43  | 991   | 108.8 | 8.56 |
| Q9NUU7 | ATP-dependent RNA helicase DDX19A OS=Homo sapiens GN=DDX19A PE=1 SV=1 - [DD19A_HUMAN]                                    | 5.02 | 2 | 1 | 1 | 1  | 1.11 | 1.18 | 1.04 | 1.10 |      |      |      |      |      |       |      |      | 478  | 53.9  | 6.58  |       |      |
| O00571 | ATP-dependent RNA helicase DDX3X OS=Homo sapiens GN=DDX3X PE=1 SV=3 - [DDX3X_HUMAN]                                      | 5.89 | 2 | 3 | 3 | 4  | 0.72 | 0.72 | 0.75 | 0.74 |      |      |      |      |      |       |      |      | 662  | 73.2  | 7.18  |       |      |
| Q8N8A6 | ATP-dependent RNA helicase DDX51 OS=Homo sapiens GN=DDX51 PE=1 SV=3 - [DDX51_HUMAN]                                      | 1.20 | 1 | 1 | 1 | 1  |      |      |      |      |      |      |      |      | 0.85 | 0.98  | 0.68 | 0.78 | 666  | 72.4  | 8.16  |       |      |
| Q8TDD1 | ATP-dependent RNA helicase DDX54 OS=Homo sapiens GN=DDX54 PE=1 SV=2 - [DDX54_HUMAN]                                      | 1.82 | 1 | 1 | 1 | 1  |      |      |      |      |      |      |      |      | 1.06 | 1.11  | 1.04 | 1.09 | 881  | 98.5  | 10.02 |       |      |
| Q7Z478 | ATP-dependent RNA helicase DHX29 OS=Homo sapiens GN=DHX29 PE=1 SV=2 - [DHX29_HUMAN]                                      | 0.66 | 1 | 1 | 1 | 5  |      |      |      |      |      |      |      |      | 0.85 | 0.70  | 1.08 | 0.89 | 1369 | 155.1 | 8.09  |       |      |
| Q14562 | ATP-dependent RNA helicase DHX8 OS=Homo sapiens GN=DHX8 PE=1 SV=1 - [DHX8_HUMAN]                                         | 1.56 | 1 | 1 | 1 | 1  | 0.93 | 0.74 | 0.86 | 0.69 |      |      |      |      |      |       |      |      | 1220 | 139.2 | 8.32  |       |      |



|        |                                                                                                                   |       |   |    |    |     |      |      |      |      |      |      |      |      |      |       |      |
|--------|-------------------------------------------------------------------------------------------------------------------|-------|---|----|----|-----|------|------|------|------|------|------|------|------|------|-------|------|
| Q8IYB8 | ATP-dependent RNA helicase SUPV3L1, mitochondrial OS=Homo sapiens GN=SUPV3L1 PE=1 SV=1 - [SUV3_HUMAN]             | 2.04  | 1 | 1  | 1  | 1   | 1.69 | 1.86 | 1.77 | 1.97 |      | 786  | 87.9 | 7.99 |      |       |      |
| Q96TA2 | ATP-dependent zinc metalloprotease YME1L1 OS=Homo sapiens GN=YME1L1 PE=1 SV=2 - [YME1_HUMAN]                      | 5.69  | 1 | 2  | 2  | 2   | 0.92 | 0.91 | 0.86 | 0.85 |      | 773  | 86.4 | 8.76 |      |       |      |
| P78508 | ATP-sensitive inward rectifier potassium channel 10 OS=Homo sapiens GN=KCNJ10 PE=1 SV=1 - [IRK10_HUMAN]           | 3.17  | 1 | 1  | 1  | 2   |      |      |      |      | 0.28 | 0.13 | 0.22 | 0.11 | 379  | 42.5  | 8.06 |
| Q99712 | ATP-sensitive inward rectifier potassium channel 15 OS=Homo sapiens GN=KCNJ15 PE=1 SV=2 - [IRK15_HUMAN]           | 3.73  | 1 | 1  | 1  | 1   |      |      |      |      | 0.76 | 0.75 | 0.90 | 0.89 | 375  | 42.6  | 7.69 |
| Q15842 | ATP-sensitive inward rectifier potassium channel 8 OS=Homo sapiens GN=KCNJ8 PE=1 SV=1 - [IRK8_HUMAN]              | 3.54  | 1 | 1  | 1  | 1   |      |      |      |      | 1.34 | 1.35 | 1.30 | 1.31 | 424  | 47.9  | 9.26 |
| Q6PL18 | ATPase family AAA domain-containing protein 2 OS=Homo sapiens GN=ATAD2 PE=1 SV=1 - [ATAD2_HUMAN]                  | 1.73  | 1 | 1  | 1  | 1   |      |      |      |      | 0.87 | 0.85 | 1.04 | 1.01 | 1390 | 158.5 | 6.32 |
| Q9ULI0 | ATPase family AAA domain-containing protein 2B OS=Homo sapiens GN=ATAD2B PE=1 SV=3 - [ATD2B_HUMAN]                | 5.14  | 1 | 3  | 3  | 6   |      |      |      |      | 0.80 | 0.65 | 1.14 | 0.91 | 1458 | 164.8 | 6.80 |
| Q96QE3 | ATPase family AAA domain-containing protein 5 OS=Homo sapiens GN=ATAD5 PE=1 SV=4 - [ATAD5_HUMAN]                  | 1.74  | 1 | 2  | 2  | 3   | 0.23 | 0.23 | 0.25 | 0.25 | 1.41 | 1.80 | 1.35 | 1.85 | 1844 | 207.4 | 9.19 |
| P20594 | Atrial natriuretic peptide receptor 2 OS=Homo sapiens GN=NPR2 PE=1 SV=1 - [ANPRB_HUMAN]                           | 0.96  | 1 | 1  | 1  | 1   | 0.91 | 0.66 | 0.87 | 0.63 |      |      |      |      | 1047 | 116.9 | 6.87 |
| O75882 | Attractin OS=Homo sapiens GN=ATRN PE=1 SV=2 - [ATRN_HUMAN]                                                        | 23.65 | 1 | 26 | 27 | 227 | 0.99 | 0.96 | 1.01 | 1.00 | 0.90 | 0.87 | 0.96 | 0.95 | 1429 | 158.4 | 7.31 |
| O75143 | Autophagy-related protein 13 OS=Homo sapiens GN=ATG13 PE=1 SV=1 - [ATG13_HUMAN]                                   | 1.74  | 1 | 1  | 1  | 1   |      |      |      |      | 0.78 | 0.66 | 0.81 | 0.68 | 517  | 56.5  | 5.12 |
| Q96BY7 | Autophagy-related protein 2 homolog B OS=Homo sapiens GN=ATG2B PE=1 SV=5 - [ATG2B_HUMAN]                          | 1.30  | 1 | 1  | 1  | 1   |      |      |      |      | 0.94 | 0.80 | 0.85 | 0.72 | 2078 | 232.6 | 5.76 |
| Q674R7 | Autophagy-related protein 9B OS=Homo sapiens GN=ATG9B PE=2 SV=1 - [ATG9B_HUMAN]                                   | 2.49  | 1 | 1  | 2  | 2   | 1.35 | 1.07 | 1.69 | 1.34 |      |      |      |      | 924  | 101.0 | 8.28 |
| Q9Y2T1 | Axin-2 OS=Homo sapiens GN=AXIN2 PE=1 SV=1 - [AXIN2_HUMAN]                                                         | 4.15  | 1 | 2  | 2  | 2   | 0.36 | 0.33 | 0.57 | 0.52 |      |      |      |      | 843  | 93.5  | 7.78 |
| O14645 | Axonemal dynein light intermediate polypeptide 1 OS=Homo sapiens GN=DNAL1 PE=2 SV=2 - [DLC_HUMAN]                 | 16.28 | 1 | 3  | 3  | 4   | 1.59 | 1.44 | 1.62 | 1.48 | 0.96 | 0.79 | 0.84 | 0.69 | 258  | 29.6  | 8.50 |
| P20160 | Azurocidin OS=Homo sapiens GN=AZU1 PE=1 SV=3 - [CAP7_HUMAN]                                                       | 13.55 | 1 | 3  | 3  | 17  | 0.91 | 0.90 | 0.90 | 0.90 | 0.94 | 0.84 | 0.98 | 0.95 | 251  | 26.9  | 9.50 |
| P11912 | B-cell antigen receptor complex-associated protein alpha chain OS=Homo sapiens GN=CD79A PE=1 SV=2 - [CD79A_HUMAN] | 6.64  | 1 | 1  | 1  | 1   | 0.75 | 0.59 | 1.67 | 1.32 |      |      |      |      | 226  | 25.0  | 5.00 |
| Q8WUZ0 | B-cell CLL/lymphoma 7 protein family member C OS=Homo sapiens GN=BCL7C PE=1 SV=3 - [BCL7C_HUMAN]                  | 3.69  | 1 | 1  | 1  | 1   |      |      |      |      | 0.71 | 0.90 | 0.67 | 0.85 | 217  | 23.5  | 5.20 |
| O00512 | B-cell CLL/lymphoma 9 protein OS=Homo sapiens GN=BCL9 PE=1 SV=4 - [BCL9_HUMAN]                                    | 2.66  | 1 | 2  | 2  | 6   | 0.75 | 0.76 | 0.96 | 0.97 | 0.92 | 1.32 | 0.76 | 1.10 | 1426 | 149.2 | 8.91 |
| P20273 | B-cell receptor CD22 OS=Homo sapiens GN=CD22 PE=1 SV=2 - [CD22_HUMAN]                                             | 1.42  | 1 | 1  | 1  | 3   | 0.87 | 1.03 | 0.63 | 0.75 |      |      |      |      | 847  | 95.3  | 6.65 |
| P17213 | Bactericidal permeability-increasing protein OS=Homo sapiens GN=BPI PE=1 SV=4 - [BPI_HUMAN]                       | 2.26  | 1 | 1  | 1  | 1   |      |      |      | 0.95 |      |      |      |      | 487  | 53.9  | 9.38 |
| Q13075 | Baculoviral IAP repeat-containing protein 1 OS=Homo sapiens GN=NAIP PE=1 SV=3 - [BIRC1_HUMAN]                     | 0.93  | 1 | 1  | 1  | 1   | 1.03 | 0.92 | 1.12 | 1.01 |      |      |      |      | 1403 | 159.5 | 5.99 |
| Q13490 | Baculoviral IAP repeat-containing protein 2 OS=Homo sapiens GN=BIRC2 PE=1 SV=2 - [BIRC2_HUMAN]                    | 3.07  | 1 | 1  | 1  | 1   |      |      |      |      | 0.40 | 0.60 | 0.59 | 0.89 | 618  | 69.9  | 6.70 |
| Q9NR09 | Baculoviral IAP repeat-containing protein 6 OS=Homo sapiens GN=BIRC6 PE=1 SV=2 - [BIRC6_HUMAN]                    | 0.31  | 1 | 1  | 1  | 1   | 1.50 |      | 1.05 |      |      |      |      |      | 4857 | 529.9 | 6.05 |
| O94812 | BAI1-associated protein 3 OS=Homo sapiens GN=BAIP3 PE=1 SV=2 - [BAIP3_HUMAN]                                      | 1.10  | 1 | 1  | 2  | 6   | 0.83 | 0.88 | 0.83 | 0.89 |      |      |      |      | 1187 | 131.8 | 6.37 |
| P02730 | Band 3 anion transport protein OS=Homo sapiens GN=SLC4A1 PE=1 SV=3 - [B3AT_HUMAN]                                 | 8.67  | 1 | 5  | 5  | 8   | 1.60 | 1.66 | 1.40 | 1.50 |      |      |      |      | 911  | 101.7 | 5.19 |
| Q9H329 | Band 4.1-like protein 4B OS=Homo sapiens GN=EPB41L4B PE=2 SV=2 - [E41LB_HUMAN]                                    | 0.67  | 1 | 1  | 1  | 1   |      |      |      |      | 1.05 | 1.10 | 1.06 | 1.11 | 900  | 99.7  | 9.04 |

|        |                                                                                                                          |       |    |    |    |      |      |      |      |      |      |      |      |      |      |       |      |      |      |       |      |
|--------|--------------------------------------------------------------------------------------------------------------------------|-------|----|----|----|------|------|------|------|------|------|------|------|------|------|-------|------|------|------|-------|------|
| Q9HCM4 | Band 4.1-like protein 5 OS=Homo sapiens GN=EPB41L5 PE=1 SV=3 - [E41L5_HUMAN]                                             | 3.82  | 10 | 2  | 2  | 2    |      |      |      |      |      |      |      |      | 1.35 | 2.58  | 1.14 | 2.18 | 733  | 81.8  | 6.58 |
| Q8TAM1 | Bardet-Biedl syndrome 10 protein OS=Homo sapiens GN=BBS10 PE=1 SV=2 - [BBS10_HUMAN]                                      | 2.49  | 1  | 1  | 1  | 10   | 1.30 | 0.99 | 1.39 | 1.05 | 1.10 | 1.16 | 1.08 | 1.32 | 723  | 80.8  | 7.77 |      |      |       |      |
| Q8N317 | Bardet-Biedl syndrome 5 protein OS=Homo sapiens GN=BBS5 PE=1 SV=1 - [BBS5_HUMAN]                                         | 4.11  | 1  | 1  | 1  | 1    | 1.29 | 1.42 | 1.37 | 1.52 |      |      |      |      | 341  | 38.7  | 5.60 |      |      |       |      |
| Q8IWZ6 | Bardet-Biedl syndrome 7 protein OS=Homo sapiens GN=BBS7 PE=1 SV=2 - [BBS7_HUMAN]                                         | 1.82  | 1  | 1  | 1  | 1    |      |      |      |      |      |      |      |      | 1.06 | 1.18  | 0.86 | 0.96 | 715  | 80.3  | 6.05 |
| O75531 | Barrier-to-autointegration factor OS=Homo sapiens GN=BANF1 PE=1 SV=1 - [BAF_HUMAN]                                       | 7.87  | 1  | 1  | 1  | 2    |      |      |      |      |      |      |      |      | 1.92 | 1.75  | 1.77 | 1.61 | 89   | 10.1  | 6.09 |
| P98160 | Basement membrane-specific heparan sulfate proteoglycan core protein OS=Homo sapiens GN=HSPG2 PE=1 SV=4 - [PGBM_HUMAN]   | 6.01  | 1  | 20 | 20 | 63   | 0.96 | 0.95 | 0.97 | 1.04 | 0.95 | 0.98 | 0.91 | 1.00 | 4391 | 468.5 | 6.51 |      |      |       |      |
| Q68DE3 | Basic helix-loop-helix domain-containing protein KIAA2018 OS=Homo sapiens GN=KIAA2018 PE=1 SV=3 - [K2018_HUMAN]          | 0.45  | 1  | 1  | 1  | 2    | 1.16 | 1.30 | 1.15 | 1.30 |      |      |      |      | 2245 | 241.5 | 7.61 |      |      |       |      |
| Q7L1Q6 | Basic leucine zipper and W2 domain-containing protein 1 OS=Homo sapiens GN=BZW1 PE=1 SV=1 - [BZW1_HUMAN]                 | 6.21  | 1  | 1  | 1  | 2    | 0.64 | 0.67 | 0.82 | 0.88 |      |      |      |      | 419  | 48.0  | 5.92 |      |      |       |      |
| P35613 | Basigin OS=Homo sapiens GN=BSG PE=1 SV=2 - [BASI_HUMAN]                                                                  | 2.34  | 1  | 1  | 1  | 1    | 0.96 | 1.06 | 0.92 | 1.02 |      |      |      |      | 385  | 42.2  | 5.66 |      |      |       |      |
| Q5TBC7 | Bcl-2-like protein 15 OS=Homo sapiens GN=BCL2L15 PE=2 SV=1 - [B2L15_HUMAN]                                               | 9.20  | 1  | 1  | 1  | 1    | 0.99 | 1.01 | 0.96 | 1.00 |      |      |      |      | 163  | 17.7  | 4.41 |      |      |       |      |
| Q6W2J9 | BCL-6 corepressor OS=Homo sapiens GN=BCOR PE=1 SV=1 - [BCOR_HUMAN]                                                       | 1.94  | 1  | 2  | 2  | 3    | 0.70 | 0.96 | 1.21 | 1.67 |      |      |      |      | 1755 | 192.1 | 6.48 |      |      |       |      |
| Q5H9F3 | BCL-6 corepressor-like protein 1 OS=Homo sapiens GN=BCORL1 PE=1 SV=1 - [BCORL_HUMAN]                                     | 1.81  | 1  | 1  | 1  | 1    |      |      |      |      |      |      |      |      | 0.97 | 0.86  | 1.05 | 0.93 | 1711 | 182.4 | 7.24 |
| Q16620 | BDNF/NT-3 growth factors receptor OS=Homo sapiens GN=NTRK2 PE=1 SV=1 - [NTRK2_HUMAN]                                     | 1.82  | 1  | 1  | 1  | 1    | 0.87 | 0.89 | 0.91 | 0.94 |      |      |      |      | 822  | 91.9  | 6.47 |      |      |       |      |
| Q14457 | Beclin-1 OS=Homo sapiens GN=BECN1 PE=1 SV=2 - [BECN1_HUMAN]                                                              | 11.33 | 1  | 2  | 2  | 2    | 1.30 | 1.44 | 1.26 | 1.39 | 0.44 | 0.64 | 1.21 | 1.78 | 450  | 51.9  | 4.89 |      |      |       |      |
| A8MW95 | Beclin-1-like protein 1 OS=Homo sapiens GN=BECN1L1 PE=3 SV=1 - [BCN1L_HUMAN]                                             | 3.40  | 1  | 1  | 1  | 3    | 0.65 | 0.74 | 0.68 | 0.79 |      |      |      |      | 441  | 49.0  | 4.88 |      |      |       |      |
| Q7L4P6 | BEN domain-containing protein 5 OS=Homo sapiens GN=BEND5 PE=1 SV=1 - [BEND5_HUMAN]                                       | 3.09  | 1  | 1  | 1  | 1    | 1.26 | 1.08 | 1.27 | 1.09 |      |      |      |      | 421  | 48.2  | 6.20 |      |      |       |      |
| Q5SZJ8 | BEN domain-containing protein 6 OS=Homo sapiens GN=BEND6 PE=2 SV=2 - [BEND6_HUMAN]                                       | 6.81  | 1  | 1  | 1  | 1    | 1.28 | 1.67 | 1.49 | 1.96 |      |      |      |      | 279  | 31.2  | 8.35 |      |      |       |      |
| O76090 | Bestrophin-1 OS=Homo sapiens GN=BEST1 PE=1 SV=1 - [BEST1_HUMAN]                                                          | 2.56  | 1  | 2  | 2  | 2    |      |      |      |      |      |      |      |      | 1.13 | 1.29  | 0.99 | 1.13 | 585  | 67.6  | 6.90 |
| Q8N1M1 | Bestrophin-3 OS=Homo sapiens GN=BEST3 PE=2 SV=1 - [BEST3_HUMAN]                                                          | 1.35  | 1  | 1  | 1  | 1    | 0.37 | 0.39 | 0.34 | 0.37 |      |      |      |      | 668  | 76.1  | 6.58 |      |      |       |      |
| Q8NFU0 | Bestrophin-4 OS=Homo sapiens GN=BEST4 PE=2 SV=1 - [BEST4_HUMAN]                                                          | 3.81  | 1  | 1  | 1  | 1    | 0.98 | 1.11 | 1.13 | 1.29 |      |      |      |      | 473  | 53.5  | 6.07 |      |      |       |      |
| Q13884 | Beta-1-syntrophin OS=Homo sapiens GN=SNB1 PE=1 SV=3 - [SNB1_HUMAN]                                                       | 2.04  | 1  | 1  | 1  | 2    | 1.13 | 0.61 | 1.96 | 1.07 | 1.26 | 1.38 | 1.29 | 1.41 | 538  | 58.0  | 8.63 |      |      |       |      |
| Q96L58 | Beta-1,3-galactosyltransferase 6 OS=Homo sapiens GN=B3GALT6 PE=2 SV=2 - [B3GT6_HUMAN]                                    | 8.21  | 1  | 2  | 2  | 2    | 1.23 | 0.97 | 1.34 | 1.06 | 0.59 | 0.74 | 0.75 | 0.93 | 329  | 37.1  | 9.66 |      |      |       |      |
| Q6Y288 | Beta-1,3-glucosyltransferase OS=Homo sapiens GN=B3GALT PE=1 SV=2 - [B3GLT_HUMAN]                                         | 1.61  | 1  | 1  | 1  | 1    | 0.97 | 0.33 | 0.91 | 0.31 |      |      |      |      | 498  | 56.5  | 7.50 |      |      |       |      |
| P15291 | Beta-1,4-galactosyltransferase 1 OS=Homo sapiens GN=B4GALT1 PE=1 SV=5 - [B4GT1_HUMAN]                                    | 2.76  | 1  | 1  | 1  | 2    | 1.33 | 1.32 | 1.25 | 1.25 |      |      |      |      | 398  | 43.9  | 8.65 |      |      |       |      |
| O43286 | Beta-1,4-galactosyltransferase 5 OS=Homo sapiens GN=B4GALT5 PE=2 SV=1 - [B4GT5_HUMAN]                                    | 2.58  | 1  | 1  | 1  | 2    | 0.67 | 0.67 | 0.66 | 0.67 |      |      |      |      | 388  | 45.1  | 8.15 |      |      |       |      |
| Q09327 | Beta-1,4-mannosyl-glycoprotein 4-beta-N-acetylglucosaminyltransferase OS=Homo sapiens GN=MGAT3 PE=2 SV=3 - [MGAT3_HUMAN] | 3.56  | 1  | 1  | 1  | 1    |      |      |      |      |      |      |      |      | 2.45 |       |      |      | 533  | 61.3  | 8.28 |
| P02749 | Beta-2-glycoprotein 1 OS=Homo sapiens GN=APOH PE=1 SV=3 - [APOH_HUMAN]                                                   | 72.17 | 1  | 24 | 24 | 1085 | 1.16 | 1.09 | 1.15 | 1.10 | 1.08 | 1.11 | 1.11 | 1.09 | 345  | 38.3  | 7.97 |      |      |       |      |

|        |                                                                                                                                       |       |   |    |    |     |      |      |      |      |      |      |      |      |     |       |      |
|--------|---------------------------------------------------------------------------------------------------------------------------------------|-------|---|----|----|-----|------|------|------|------|------|------|------|------|-----|-------|------|
| P61769 | Beta-2-microglobulin OS=Homo sapiens GN=B2M PE=1 SV=1 - [B2MG_HUMAN]                                                                  | 48.74 | 1 | 6  | 6  | 67  | 0.85 | 0.86 | 0.80 | 0.80 | 1.14 | 1.19 | 1.18 | 1.29 | 119 | 13.7  | 6.52 |
| Q13425 | Beta-2-syntrophin OS=Homo sapiens GN=SNTB2 PE=1 SV=1 - [SNTB2_HUMAN]                                                                  | 0.93  | 1 | 1  | 1  | 1   |      |      |      |      | 0.17 | 1.87 | 0.53 | 5.70 | 540 | 57.9  | 8.82 |
| Q562R1 | Beta-actin-like protein 2 OS=Homo sapiens GN=ACTBL2 PE=1 SV=2 - [ACTBL_HUMAN]                                                         | 21.01 | 2 | 2  | 7  | 96  | 0.71 | 0.86 | 0.74 | 0.89 |      |      |      |      | 376 | 42.0  | 5.59 |
| P35612 | Beta-adducin OS=Homo sapiens GN=ADD2 PE=1 SV=3 - [ADDB_HUMAN]                                                                         | 2.34  | 1 | 1  | 1  | 1   |      |      |      |      |      | 1.25 |      |      | 726 | 80.8  | 5.92 |
| P25098 | Beta-adrenergic receptor kinase 1 OS=Homo sapiens GN=ADRBK1 PE=1 SV=2 - [ARBK1_HUMAN]                                                 | 0.87  | 1 | 1  | 1  | 1   | 0.56 | 0.53 | 0.66 | 0.62 |      |      |      |      | 689 | 79.5  | 7.28 |
| Q96KN2 | Beta-Ala-His dipeptidase OS=Homo sapiens GN=CNDP1 PE=1 SV=4 - [CNDP1_HUMAN]                                                           | 49.31 | 1 | 21 | 21 | 200 | 1.21 | 1.19 | 1.17 | 1.20 | 1.26 | 1.43 | 1.25 | 1.37 | 507 | 56.7  | 5.30 |
| Q6UWU2 | Beta-galactosidase-1-like protein OS=Homo sapiens GN=GLB1L PE=2 SV=1 - [GLB1L_HUMAN]                                                  | 3.52  | 2 | 2  | 2  | 4   | 0.95 | 1.03 | 1.05 | 1.14 | 1.19 | 1.16 | 1.14 | 1.12 | 654 | 74.1  | 8.92 |
| P15907 | Beta-galactoside alpha-2,6-sialyltransferase 1 OS=Homo sapiens GN=ST6GAL1 PE=1 SV=1 - [SIAT1_HUMAN]                                   | 2.46  | 1 | 1  | 1  | 2   | 1.35 | 1.10 | 1.33 | 1.10 |      |      |      |      | 406 | 46.6  | 9.01 |
| P08236 | Beta-glucuronidase OS=Homo sapiens GN=GUSB PE=1 SV=2 - [BGLR_HUMAN]                                                                   | 2.61  | 1 | 2  | 2  | 2   | 0.99 | 1.07 | 1.36 | 1.48 | 0.81 | 1.15 | 0.85 | 1.20 | 651 | 74.7  | 7.02 |
| P07686 | Beta-hexosaminidase subunit beta OS=Homo sapiens GN=HEXB PE=1 SV=3 - [HEXB_HUMAN]                                                     | 1.80  | 1 | 1  | 1  | 2   | 1.17 | 1.16 | 1.30 | 1.30 |      |      |      |      | 556 | 63.1  | 6.76 |
| O00462 | Beta-mannosidase OS=Homo sapiens GN=MANBA PE=1 SV=3 - [MANBA_HUMAN]                                                                   | 2.73  | 1 | 2  | 2  | 4   | 1.45 | 1.55 | 1.54 | 1.65 | 2.06 | 2.09 | 2.01 | 2.04 | 879 | 100.8 | 5.52 |
| Q9HB11 | Beta-parvin OS=Homo sapiens GN=PARVB PE=1 SV=1 - [PARVB_HUMAN]                                                                        | 15.66 | 2 | 5  | 5  | 9   | 0.66 | 0.83 | 0.75 | 0.83 |      |      |      |      | 364 | 41.7  | 6.73 |
| Q9H115 | Beta-soluble NSF attachment protein OS=Homo sapiens GN=NAPB PE=1 SV=2 - [SNAB_HUMAN]                                                  | 9.73  | 1 | 2  | 2  | 2   | 0.78 | 0.92 | 0.83 | 0.99 | 0.88 | 1.03 | 0.86 | 1.01 | 298 | 33.5  | 5.47 |
| Q8N3L3 | Beta-taxilin OS=Homo sapiens GN=TXLNB PE=1 SV=3 - [TXLNB_HUMAN]                                                                       | 2.78  | 1 | 1  | 1  | 1   |      |      |      |      | 0.93 | 1.23 | 0.99 | 1.30 | 684 | 76.5  | 4.93 |
| Q96PL2 | Beta-tectorin OS=Homo sapiens GN=TECTB PE=2 SV=1 - [TECTB_HUMAN]                                                                      | 7.60  | 1 | 1  | 1  | 2   |      |      |      |      | 1.33 | 2.99 | 0.40 | 0.90 | 329 | 36.9  | 8.05 |
| Q9HAY6 | Beta,beta-carotene 15,15'-monooxygenase OS=Homo sapiens GN=BCMO1 PE=1 SV=1 - [BCDO1_HUMAN]                                            | 2.01  | 1 | 1  | 1  | 1   |      |      |      |      | 0.85 | 0.81 | 0.86 | 0.82 | 547 | 62.6  | 6.67 |
| Q9BYV7 | Beta,beta-carotene 9',10'-oxygenase OS=Homo sapiens GN=BCO2 PE=1 SV=5 - [BCDO2_HUMAN]                                                 | 2.42  | 1 | 1  | 1  | 1   | 1.30 | 0.85 | 1.31 | 0.86 |      |      |      |      | 579 | 65.6  | 8.41 |
| Q93088 | Betaine-homocysteine S-methyltransferase 1 OS=Homo sapiens GN=BHMT PE=1 SV=2 - [BHMT1_HUMAN]                                          | 2.22  | 1 | 1  | 1  | 2   | 1.09 | 0.85 | 1.11 | 0.87 |      |      |      |      | 406 | 45.0  | 7.03 |
| A1A5D9 | Bicaudal D-related protein 2 OS=Homo sapiens GN=CCDC64B PE=2 SV=2 - [BICR2_HUMAN]                                                     | 2.36  | 1 | 1  | 1  | 3   |      |      |      |      | 0.76 | 0.72 | 0.54 | 0.51 | 508 | 56.8  | 5.02 |
| O43252 | Bifunctional 3'-phosphoadenosine 5'-phosphosulfate synthase 1 OS=Homo sapiens GN=PAPSS1 PE=1 SV=2 - [PAPS1_HUMAN]                     | 2.56  | 1 | 1  | 1  | 14  | 1.15 | 1.18 | 1.23 | 1.17 | 0.67 | 0.88 | 0.92 | 1.21 | 624 | 70.8  | 6.86 |
| Q3LXA3 | Bifunctional ATP-dependent dihydroxyacetone kinase/FAD-AMP lyase (cyclizing) OS=Homo sapiens GN=DAK PE=1 SV=2 - [DHAK_HUMAN]          | 2.78  | 1 | 1  | 1  | 1   | 1.85 | 1.25 | 1.73 | 1.19 |      |      |      |      | 575 | 58.9  | 7.49 |
| Q13057 | Bifunctional coenzyme A synthase OS=Homo sapiens GN=COASY PE=1 SV=4 - [COASY_HUMAN]                                                   | 3.01  | 1 | 1  | 1  | 5   | 2.02 | 1.36 | 2.63 | 1.77 |      |      |      |      | 564 | 62.3  | 6.99 |
| P52848 | Bifunctional heparan sulfate N-deacetylase/N-sulfotransferase 1 OS=Homo sapiens GN=NDST1 PE=1 SV=1 - [NDST1_HUMAN]                    | 0.79  | 1 | 1  | 1  | 12  | 1.04 | 1.18 | 0.94 | 1.06 | 1.38 | 1.01 | 1.27 | 1.00 | 882 | 100.8 | 7.97 |
| O95803 | Bifunctional heparan sulfate N-deacetylase/N-sulfotransferase 3 OS=Homo sapiens GN=NDST3 PE=2 SV=1 - [NDST3_HUMAN]                    | 1.60  | 1 | 1  | 1  | 1   |      |      |      |      | 1.03 | 0.78 | 1.15 | 0.87 | 873 | 100.8 | 8.06 |
| P13995 | Bifunctional methylenetetrahydrofolate dehydrogenase/cyclohydrolase, mitochondrial OS=Homo sapiens GN=MTHFD2 PE=1 SV=2 - [MTDC_HUMAN] | 3.43  | 1 | 1  | 1  | 1   |      |      |      |      | 0.82 | 0.86 | 0.90 | 0.94 | 350 | 37.9  | 8.73 |
| O60502 | Bifunctional protein NCOAT OS=Homo sapiens GN=MGEA5 PE=1 SV=2 - [NCOAT_HUMAN]                                                         | 1.42  | 1 | 1  | 1  | 1   |      |      |      |      | 1.17 | 1.01 | 0.85 | 0.73 | 916 | 102.8 | 4.91 |
| P31939 | Bifunctional purine biosynthesis protein PURH OS=Homo sapiens GN=ATIC PE=1 SV=3 - [PUR9_HUMAN]                                        | 2.20  | 1 | 1  | 1  | 13  | 0.83 | 0.95 | 0.83 | 0.95 | 1.13 | 0.86 | 1.15 | 0.87 | 592 | 64.6  | 6.71 |

|        |                                                                                                                                   |       |   |   |   |    |      |      |      |      |      |      |      |      |      |       |      |
|--------|-----------------------------------------------------------------------------------------------------------------------------------|-------|---|---|---|----|------|------|------|------|------|------|------|------|------|-------|------|
| P21810 | Biglycan OS=Homo sapiens GN=BGN PE=1 SV=2 - [PGS1_HUMAN]                                                                          | 5.43  | 1 | 2 | 2 | 3  | 1.18 | 1.11 | 1.13 | 1.07 | 1.74 | 1.63 | 1.70 | 1.60 | 368  | 41.6  | 7.52 |
| Q9Y2P5 | Bile acyl-CoA synthetase OS=Homo sapiens GN=SLC27A5 PE=1 SV=1 - [S27A5_HUMAN]                                                     | 2.61  | 1 | 1 | 1 | 1  |      |      |      |      | 0.94 | 0.86 | 0.96 | 0.88 | 690  | 75.3  | 7.66 |
| O95342 | Bile salt export pump OS=Homo sapiens GN=ABCB11 PE=1 SV=2 - [ABCB11_HUMAN]                                                        | 0.91  | 1 | 1 | 1 | 1  |      |      |      |      | 0.99 | 0.94 | 0.90 | 0.85 | 1321 | 146.3 | 6.57 |
| Q8NFC6 | Biorientation of chromosomes in cell division protein 1-like OS=Homo sapiens GN=BOD1L PE=1 SV=2 - [BOD1L_HUMAN]                   | 0.46  | 1 | 1 | 1 | 1  |      |      |      |      | 1.21 | 1.55 | 1.03 | 1.32 | 3051 | 330.3 | 5.08 |
| P43251 | Biotinidase OS=Homo sapiens GN=BTD PE=1 SV=2 - [BTD_HUMAN]                                                                        | 17.13 | 1 | 8 | 8 | 56 | 0.95 | 1.03 | 0.92 | 0.97 | 1.10 | 1.19 | 1.07 | 1.11 | 543  | 61.1  | 6.25 |
| Q13867 | Bleomycin hydrolase OS=Homo sapiens GN=BLMH PE=1 SV=1 - [BLMH_HUMAN]                                                              | 4.40  | 1 | 1 | 1 | 2  |      |      |      |      | 0.98 | 1.12 | 0.99 | 1.13 | 455  | 52.5  | 6.27 |
| Q8NE79 | Blood vessel epicardial substance OS=Homo sapiens GN=BVES PE=1 SV=1 - [POPD1_HUMAN]                                               | 1.39  | 1 | 1 | 1 | 1  |      |      |      |      | 0.60 | 0.80 | 0.75 | 0.99 | 360  | 41.4  | 7.90 |
| P54132 | Bloom syndrome protein OS=Homo sapiens GN=BLM PE=1 SV=1 - [BLM_HUMAN]                                                             | 1.48  | 1 | 1 | 1 | 2  | 1.06 | 1.48 | 1.23 | 1.71 |      |      |      |      | 1417 | 158.9 | 7.49 |
| Q6UWU4 | Bombesin receptor-activated protein C6orf89 OS=Homo sapiens GN=C6orf89 PE=1 SV=1 - [CF089_HUMAN]                                  | 3.17  | 1 | 1 | 1 | 1  | 1.46 | 1.43 | 1.51 | 1.50 |      |      |      |      | 347  | 39.8  | 6.83 |
| P13727 | Bone marrow proteoglycan OS=Homo sapiens GN=PRG2 PE=1 SV=2 - [PRG2_HUMAN]                                                         | 17.12 | 1 | 5 | 5 | 20 | 2.29 | 2.50 | 2.31 | 2.55 | 1.50 | 1.88 | 1.66 | 1.99 | 222  | 25.2  | 6.76 |
| P13497 | Bone morphogenetic protein 1 OS=Homo sapiens GN=BMP1 PE=1 SV=2 - [BMP1_HUMAN]                                                     | 2.84  | 1 | 2 | 2 | 3  |      |      |      |      | 1.02 | 1.06 | 1.04 | 1.10 | 986  | 111.2 | 6.90 |
| P55107 | Bone morphogenetic protein 3B OS=Homo sapiens GN=GDF10 PE=1 SV=1 - [BMP3B_HUMAN]                                                  | 3.14  | 1 | 1 | 1 | 1  | 1.04 | 0.89 | 0.97 | 0.84 |      |      |      |      | 478  | 53.1  | 9.51 |
| P36894 | Bone morphogenetic protein receptor type-1A OS=Homo sapiens GN=BMPRI1A PE=1 SV=2 - [BMR1A_HUMAN]                                  | 2.82  | 1 | 2 | 2 | 2  | 1.32 | 1.10 | 1.05 | 0.88 |      |      |      |      | 532  | 60.2  | 7.58 |
| Q9BQP9 | BPI fold-containing family A member 3 OS=Homo sapiens GN=BPIFA3 PE=2 SV=3 - [BPIA3_HUMAN]                                         | 11.42 | 1 | 1 | 1 | 3  |      |      | 1.37 |      |      |      |      |      | 254  | 28.4  | 6.65 |
| Q8TDL5 | BPI fold-containing family B member 1 OS=Homo sapiens GN=BPIFB1 PE=2 SV=1 - [BPIB1_HUMAN]                                         | 10.54 | 2 | 5 | 5 | 14 | 1.10 | 0.96 | 1.27 | 1.16 |      |      |      |      | 484  | 52.4  | 7.23 |
| Q8NFC6 | BPI fold-containing family C protein OS=Homo sapiens GN=BPIFC PE=1 SV=1 - [BPIFC_HUMAN]                                           | 7.10  | 1 | 1 | 3 | 5  | 0.89 | 0.88 | 0.91 | 0.90 |      |      |      |      | 507  | 56.4  | 5.82 |
| P80723 | Brain acid soluble protein 1 OS=Homo sapiens GN=BASP1 PE=1 SV=2 - [BASP1_HUMAN]                                                   | 31.72 | 1 | 4 | 4 | 20 | 0.89 | 0.95 | 1.13 | 1.12 | 1.19 | 1.14 | 0.98 | 0.99 | 227  | 22.7  | 4.63 |
| P23560 | Brain-derived neurotrophic factor OS=Homo sapiens GN=BDNF PE=1 SV=1 - [BDNF_HUMAN]                                                | 13.77 | 1 | 2 | 2 | 4  |      |      |      |      | 0.99 | 1.52 | 1.12 | 1.71 | 247  | 27.8  | 8.79 |
| Q9BUH8 | Brain-enriched guanylate kinase-associated protein OS=Homo sapiens GN=BEGAIN PE=1 SV=1 - [BEGIN_HUMAN]                            | 1.69  | 1 | 1 | 1 | 1  | 1.05 | 1.05 | 1.20 | 1.21 |      |      |      |      | 593  | 64.8  | 5.57 |
| Q6UXY1 | Brain-specific angiogenesis inhibitor 1-associated protein 2-like protein 2 OS=Homo sapiens GN=BAIAP2L2 PE=1 SV=1 - [BI2L2_HUMAN] | 3.59  | 1 | 1 | 1 | 1  | 1.00 | 1.08 | 1.05 | 1.14 |      |      |      |      | 529  | 58.9  | 9.51 |
| O60241 | Brain-specific angiogenesis inhibitor 2 OS=Homo sapiens GN=BAI2 PE=2 SV=2 - [BAI2_HUMAN]                                          | 1.14  | 1 | 1 | 1 | 2  |      |      |      |      | 0.19 | 0.10 | 0.63 | 0.34 | 1585 | 172.5 | 7.42 |
| Q9NXR7 | BRCA1-A complex subunit BRE OS=Homo sapiens GN=BRE PE=1 SV=2 - [BRE_HUMAN]                                                        | 3.39  | 1 | 1 | 1 | 1  |      |      |      |      | 1.04 | 0.77 | 1.03 | 0.76 | 383  | 43.5  | 5.81 |
| Q96RL1 | BRCA1-A complex subunit RAP80 OS=Homo sapiens GN=UIMC1 PE=1 SV=2 - [UIMC1_HUMAN]                                                  | 1.95  | 1 | 1 | 1 | 2  |      |      |      |      | 0.94 | 0.78 | 0.73 | 0.60 | 719  | 79.7  | 5.45 |
| Q6PJG6 | BRCA1-associated ATM activator 1 OS=Homo sapiens GN=BRAT1 PE=1 SV=2 - [BRAT1_HUMAN]                                               | 4.99  | 1 | 1 | 1 | 1  | 1.21 | 1.09 | 1.08 | 1.00 |      |      |      |      | 821  | 88.1  | 5.27 |
| Q99728 | BRCA1-associated RING domain protein 1 OS=Homo sapiens GN=BARD1 PE=1 SV=2 - [BARD1_HUMAN]                                         | 2.06  | 1 | 2 | 2 | 3  | 0.81 | 0.86 | 0.77 | 0.83 | 1.28 | 1.20 | 1.21 | 1.13 | 777  | 86.6  | 8.72 |
| P56945 | Breast cancer anti-estrogen resistance protein 1 OS=Homo sapiens GN=BCAR1 PE=1 SV=2 - [BCAR1_HUMAN]                               | 0.92  | 1 | 1 | 1 | 34 | 1.01 | 0.94 | 0.90 | 0.84 | 0.90 | 0.67 | 1.62 | 0.71 | 870  | 93.3  | 5.67 |
| Q9HCU9 | Breast cancer metastasis-suppressor 1 OS=Homo sapiens GN=BRMS1 PE=1 SV=1 - [BRMS1_HUMAN]                                          | 7.72  | 1 | 1 | 1 | 1  |      |      |      |      | 0.99 | 1.00 | 0.98 | 0.99 | 246  | 28.4  | 4.74 |

|        |                                                                                                                 |      |   |   |   |    |      |      |      |      |      |      |      |      |      |       |      |      |       |      |
|--------|-----------------------------------------------------------------------------------------------------------------|------|---|---|---|----|------|------|------|------|------|------|------|------|------|-------|------|------|-------|------|
| Q5PSV4 | Breast cancer metastasis-suppressor 1-like protein OS=Homo sapiens GN=BRMS1L PE=1 SV=2 - [BRM1L_HUMAN]          | 3.10 | 1 | 1 | 1 | 5  | 1.05 | 1.30 | 0.90 | 1.21 |      |      |      |      |      |       |      | 323  | 37.6  | 5.15 |
| P51587 | Breast cancer type 2 susceptibility protein OS=Homo sapiens GN=BRCA2 PE=1 SV=2 - [BRCA2_HUMAN]                  | 1.43 | 1 | 2 | 2 | 2  | 0.94 | 1.29 | 0.99 | 1.37 |      |      |      |      |      |       |      | 3418 | 384.0 | 6.73 |
| Q9Y6D6 | Brefeldin A-inhibited guanine nucleotide-exchange protein 1 OS=Homo sapiens GN=ARFGEF1 PE=1 SV=2 - [BIG1_HUMAN] | 0.59 | 1 | 1 | 1 | 52 |      |      |      |      | 0.82 | 1.00 | 0.92 | 1.13 | 1849 | 208.6 | 5.85 |      |       |      |
| Q9Y6D5 | Brefeldin A-inhibited guanine nucleotide-exchange protein 2 OS=Homo sapiens GN=ARFGEF2 PE=1 SV=3 - [BIG2_HUMAN] | 4.71 | 1 | 4 | 4 | 5  | 0.80 | 0.88 | 0.80 | 0.76 |      |      |      |      | 1785 | 201.9 | 6.33 |      |       |      |
| Q96GW7 | Brevican core protein OS=Homo sapiens GN=BCAN PE=1 SV=2 - [PGCB_HUMAN]                                          | 4.94 | 1 | 2 | 3 | 4  |      |      |      |      | 1.60 | 1.38 | 1.43 | 1.23 | 911  | 99.1  | 4.64 |      |       |      |
| Q9UBW5 | Bridging integrator 2 OS=Homo sapiens GN=BIN2 PE=1 SV=3 - [BIN2_HUMAN]                                          | 9.91 | 1 | 5 | 5 | 78 | 0.37 | 0.25 | 0.48 | 0.30 | 1.87 | 1.96 | 1.41 | 1.42 | 565  | 61.8  | 5.15 |      |       |      |
| Q9UIF9 | Bromodomain adjacent to zinc finger domain protein 2A OS=Homo sapiens GN=BAZ2A PE=1 SV=4 - [BAZ2A_HUMAN]        | 2.52 | 7 | 2 | 3 | 5  | 1.20 | 1.36 | 1.30 | 1.46 | 0.86 | 0.77 | 0.90 | 0.81 | 1905 | 211.1 | 6.64 |      |       |      |
| Q9UIF8 | Bromodomain adjacent to zinc finger domain protein 2B OS=Homo sapiens GN=BAZ2B PE=1 SV=3 - [BAZ2B_HUMAN]        | 1.29 | 1 | 1 | 1 | 1  | 0.92 | 0.84 | 0.69 | 0.64 |      |      |      |      | 2168 | 240.3 | 6.54 |      |       |      |
| Q9ULD4 | Bromodomain and PHD finger-containing protein 3 OS=Homo sapiens GN=BRPF3 PE=1 SV=2 - [BRPF3_HUMAN]              | 1.33 | 1 | 1 | 1 | 2  | 0.86 | 0.73 | 0.92 | 0.79 |      |      |      |      | 1205 | 135.7 | 6.58 |      |       |      |
| Q9NSI6 | Bromodomain and WD repeat-containing protein 1 OS=Homo sapiens GN=BRWD1 PE=1 SV=4 - [BRWD1_HUMAN]               | 1.03 | 1 | 1 | 2 | 3  |      |      |      |      | 1.06 | 0.97 | 0.95 | 0.86 | 2320 | 262.8 | 8.46 |      |       |      |
| Q6RI45 | Bromodomain and WD repeat-containing protein 3 OS=Homo sapiens GN=BRWD3 PE=1 SV=2 - [BRWD3_HUMAN]               | 2.33 | 1 | 3 | 3 | 21 | 0.76 | 0.97 | 0.75 | 0.95 | 2.24 | 1.99 | 2.25 | 1.99 | 1802 | 203.5 | 7.84 |      |       |      |
| Q58F21 | Bromodomain testis-specific protein OS=Homo sapiens GN=BRDT PE=1 SV=4 - [BRDT_HUMAN]                            | 2.75 | 1 | 2 | 2 | 2  | 1.32 | 1.34 | 1.17 | 1.19 |      |      |      |      | 947  | 107.9 | 8.95 |      |       |      |
| O60885 | Bromodomain-containing protein 4 OS=Homo sapiens GN=BRD4 PE=1 SV=2 - [BRD4_HUMAN]                               | 1.25 | 1 | 1 | 1 | 1  |      |      |      |      | 0.71 | 0.41 | 0.81 | 0.47 | 1362 | 152.1 | 9.19 |      |       |      |
| Q9H0E9 | Bromodomain-containing protein 8 OS=Homo sapiens GN=BRD8 PE=1 SV=2 - [BRD8_HUMAN]                               | 1.46 | 1 | 1 | 1 | 1  |      |      |      |      | 0.94 | 1.12 | 0.98 | 1.16 | 1235 | 135.3 | 4.60 |      |       |      |
| Q9H8M2 | Bromodomain-containing protein 9 OS=Homo sapiens GN=BRD9 PE=1 SV=2 - [BRD9_HUMAN]                               | 3.02 | 1 | 1 | 1 | 2  | 0.50 | 0.42 | 0.49 | 0.41 | 0.33 | 0.40 | 0.36 | 0.43 | 597  | 67.0  | 6.19 |      |       |      |
| Q9BSF8 | BTB/POZ domain-containing protein 10 OS=Homo sapiens GN=BTBD10 PE=1 SV=2 - [BTBDA_HUMAN]                        | 3.16 | 1 | 1 | 1 | 1  |      |      |      |      | 1.06 | 1.12 | 0.89 | 0.94 | 475  | 53.7  | 7.77 |      |       |      |
| Q9Y2F9 | BTB/POZ domain-containing protein 3 OS=Homo sapiens GN=BTBD3 PE=2 SV=1 - [BTBD3_HUMAN]                          | 2.30 | 1 | 1 | 1 | 1  |      |      |      |      | 0.73 | 0.83 | 0.80 | 0.91 | 522  | 58.4  | 7.46 |      |       |      |
| Q5XKL5 | BTB/POZ domain-containing protein 8 OS=Homo sapiens GN=BTBD8 PE=2 SV=2 - [BTBD8_HUMAN]                          | 3.70 | 1 | 1 | 1 | 1  |      |      |      |      | 0.51 | 0.60 | 0.62 | 0.73 | 378  | 42.8  | 6.00 |      |       |      |
| Q68DU8 | BTB/POZ domain-containing protein KCTD16 OS=Homo sapiens GN=KCTD16 PE=2 SV=1 - [KCD16_HUMAN]                    | 3.27 | 1 | 1 | 1 | 1  |      |      |      |      | 0.64 | 0.75 | 0.67 | 0.79 | 428  | 49.1  | 8.09 |      |       |      |
| Q8NSZ5 | BTB/POZ domain-containing protein KCTD17 OS=Homo sapiens GN=KCTD17 PE=1 SV=3 - [KCD17_HUMAN]                    | 4.98 | 1 | 1 | 1 | 1  |      |      |      |      | 0.84 |      | 1.48 |      | 321  | 35.6  | 4.86 |      |       |      |
| Q8WVF5 | BTB/POZ domain-containing protein KCTD4 OS=Homo sapiens GN=KCTD4 PE=2 SV=2 - [KCTD4_HUMAN]                      | 3.47 | 1 | 1 | 1 | 1  |      |      |      |      | 1.06 | 0.85 | 1.40 | 1.12 | 259  | 29.9  | 7.06 |      |       |      |
| Q6ZWB6 | BTB/POZ domain-containing protein KCTD8 OS=Homo sapiens GN=KCTD8 PE=2 SV=1 - [KCTD8_HUMAN]                      | 8.03 | 1 | 2 | 2 | 4  | 1.28 | 1.29 | 1.24 | 1.25 | 1.06 | 0.85 | 1.30 | 1.04 | 473  | 52.4  | 8.37 |      |       |      |
| Q9BRD0 | BUD13 homolog OS=Homo sapiens GN=BUD13 PE=1 SV=1 - [BUD13_HUMAN]                                                | 1.45 | 1 | 1 | 1 | 5  | 1.01 | 0.86 | 0.97 | 0.83 | 1.02 | 1.46 | 1.03 | 1.49 | 619  | 70.5  | 9.86 |      |       |      |
| Q8WVV5 | Butyrophilin subfamily 2 member A2 OS=Homo sapiens GN=BTN2A2 PE=2 SV=2 - [BT2A2_HUMAN]                          | 4.78 | 1 | 2 | 2 | 2  | 1.48 | 1.06 | 1.30 | 0.94 | 0.15 | 1.55 | 0.39 | 4.02 | 523  | 59.0  | 6.01 |      |       |      |
| P78410 | Butyrophilin subfamily 3 member A2 OS=Homo sapiens GN=BTN3A2 PE=1 SV=2 - [BT3A2_HUMAN]                          | 4.19 | 1 | 1 | 1 | 1  |      |      |      |      | 1.44 | 1.32 | 1.40 | 1.28 | 334  | 36.4  | 5.33 |      |       |      |
| P41238 | C->U-editing enzyme APOBEC-1 OS=Homo sapiens GN=APOBEC1 PE=1 SV=3 - [ABEC1_HUMAN]                               | 7.20 | 1 | 1 | 1 | 2  | 1.01 | 0.89 | 1.04 | 0.93 | 0.68 | 0.89 | 0.73 | 0.96 | 236  | 28.2  | 8.78 |      |       |      |
| P11586 | C-1-tetrahydrofolate synthase, cytoplasmic OS=Homo sapiens GN=MTHFD1 PE=1 SV=3 - [C1TC_HUMAN]                   | 4.06 | 1 | 2 | 2 | 2  | 0.97 | 1.14 | 0.75 | 1.05 |      |      |      |      | 935  | 101.5 | 7.30 |      |       |      |

|        |                                                                                                                       |       |   |    |    |     |      |      |      |      |      |      |      |      |      |       |       |
|--------|-----------------------------------------------------------------------------------------------------------------------|-------|---|----|----|-----|------|------|------|------|------|------|------|------|------|-------|-------|
| O00421 | C-C chemokine receptor-like 2 OS=Homo sapiens GN=CCRL2 PE=1 SV=2 - [CCRL2_HUMAN]                                      | 5.23  | 1 | 1  | 1  | 1   |      |      |      |      | 0.55 | 0.10 | 0.66 | 0.12 | 344  | 39.5  | 7.77  |
| O15467 | C-C motif chemokine 16 OS=Homo sapiens GN=CCL16 PE=1 SV=1 - [CCL16_HUMAN]                                             | 13.33 | 1 | 2  | 2  | 5   |      |      |      |      | 1.03 | 0.99 | 1.03 | 0.99 | 120  | 13.6  | 9.54  |
| P55774 | C-C motif chemokine 18 OS=Homo sapiens GN=CCL18 PE=1 SV=1 - [CCL18_HUMAN]                                             | 10.11 | 1 | 1  | 1  | 1   |      |      |      |      | 1.30 | 1.28 | 1.09 | 1.07 | 89   | 9.8   | 8.75  |
| O00585 | C-C motif chemokine 21 OS=Homo sapiens GN=CCL21 PE=1 SV=1 - [CCL21_HUMAN]                                             | 8.96  | 1 | 1  | 1  | 1   |      |      |      |      | 1.09 | 0.99 | 1.08 | 0.98 | 134  | 14.6  | 10.10 |
| O15444 | C-C motif chemokine 25 OS=Homo sapiens GN=CCL25 PE=1 SV=2 - [CCL25_HUMAN]                                             | 12.67 | 1 | 1  | 1  | 1   |      |      |      |      | 1.05 | 1.36 | 1.26 | 1.63 | 150  | 16.6  | 10.17 |
| P13501 | C-C motif chemokine 5 OS=Homo sapiens GN=CCL5 PE=1 SV=3 - [CCL5_HUMAN]                                                | 12.09 | 1 | 1  | 1  | 2   |      |      |      |      | 0.99 | 0.86 | 1.22 | 1.06 | 91   | 10.0  | 9.07  |
| Q9UQF2 | C-Jun-amino-terminal kinase-interacting protein 1 OS=Homo sapiens GN=MAPK8IP1 PE=1 SV=1 - [JIP1_HUMAN]                | 4.08  | 1 | 1  | 1  | 1   | 0.87 | 1.17 | 0.50 | 0.68 |      |      |      |      | 711  | 77.5  | 4.98  |
| Q13387 | C-Jun-amino-terminal kinase-interacting protein 2 OS=Homo sapiens GN=MAPK8IP2 PE=2 SV=2 - [JIP2_HUMAN]                | 2.67  | 1 | 1  | 1  | 1   |      |      |      |      | 0.95 | 1.03 | 0.69 | 0.75 | 824  | 87.9  | 4.46  |
| Q7Z401 | C-myc promoter-binding protein OS=Homo sapiens GN=DENND4A PE=1 SV=2 - [MYCPP_HUMAN]                                   | 1.23  | 1 | 1  | 1  | 1   | 1.50 | 1.54 | 1.28 | 1.32 |      |      |      |      | 1863 | 209.1 | 7.31  |
| P02741 | C-reactive protein OS=Homo sapiens GN=CRP PE=1 SV=1 - [CRP_HUMAN]                                                     | 23.21 | 1 | 7  | 7  | 34  | 1.25 | 1.38 | 1.27 | 1.53 | 1.31 | 1.42 | 1.33 | 1.45 | 224  | 25.0  | 5.63  |
| Q9P126 | C-type lectin domain family 1 member B OS=Homo sapiens GN=CLEC1B PE=1 SV=2 - [CLC1B_HUMAN]                            | 5.24  | 1 | 1  | 1  | 1   |      |      |      |      | 1.05 | 1.22 | 1.16 | 1.34 | 229  | 26.6  | 8.50  |
| Q9Y240 | C-type lectin domain family 11 member A OS=Homo sapiens GN=CLEC11A PE=1 SV=1 - [CLC11_HUMAN]                          | 4.33  | 1 | 1  | 1  | 1   | 1.29 | 1.12 | 1.08 | 0.94 |      |      |      |      | 323  | 35.7  | 5.16  |
| P0C7M8 | C-type lectin domain family 2 member L OS=Homo sapiens GN=CLEC2L PE=2 SV=1 - [CLC2L_HUMAN]                            | 1.87  | 1 | 1  | 1  | 1   |      |      |      |      | 0.61 | 0.59 | 0.53 | 0.51 | 214  | 23.9  | 7.20  |
| Q8N1N0 | C-type lectin domain family 4 member F OS=Homo sapiens GN=CLEC4F PE=2 SV=2 - [CLC4F_HUMAN]                            | 2.38  | 1 | 1  | 1  | 1   | 0.32 | 0.54 | 0.25 | 0.42 |      |      |      |      | 589  | 65.5  | 6.70  |
| Q9BXN2 | C-type lectin domain family 7 member A OS=Homo sapiens GN=CLEC7A PE=1 SV=1 - [CLC7A_HUMAN]                            | 7.69  | 1 | 1  | 1  | 6   | 0.98 | 0.76 | 0.96 | 0.75 |      |      |      |      | 247  | 27.6  | 5.36  |
| Q9UBG0 | C-type mannose receptor 2 OS=Homo sapiens GN=MRC2 PE=1 SV=2 - [MRC2_HUMAN]                                            | 1.76  | 1 | 2  | 2  | 4   | 0.94 | 0.97 | 0.89 | 0.92 |      |      |      |      | 1479 | 166.6 | 5.83  |
| P42830 | C-X-C motif chemokine 5 OS=Homo sapiens GN=CXCL5 PE=1 SV=1 - [CXCL5_HUMAN]                                            | 10.53 | 1 | 1  | 1  | 1   |      |      |      |      | 0.61 | 0.25 | 0.92 | 0.37 | 114  | 12.0  | 8.88  |
| Q8IZJ3 | C3 and PZP-like alpha-2-macroglobulin domain-containing protein 8 OS=Homo sapiens GN=CPAMD8 PE=1 SV=2 - [CPMD8_HUMAN] | 0.95  | 1 | 1  | 1  | 1   |      |      |      |      | 1.01 | 1.03 | 1.04 | 1.06 | 1885 | 206.6 | 6.42  |
| P04003 | C4b-binding protein alpha chain OS=Homo sapiens GN=C4BPA PE=1 SV=2 - [C4BPA_HUMAN]                                    | 52.26 | 1 | 32 | 32 | 889 | 0.91 | 0.87 | 0.91 | 0.90 | 1.06 | 0.96 | 1.08 | 1.00 | 597  | 67.0  | 7.30  |
| P20851 | C4b-binding protein beta chain OS=Homo sapiens GN=C4BPB PE=1 SV=1 - [C4BPB_HUMAN]                                     | 47.22 | 1 | 11 | 11 | 241 | 0.98 | 1.01 | 0.99 | 1.07 | 1.22 | 1.17 | 1.21 | 1.10 | 252  | 28.3  | 5.14  |
| Q9P296 | C5a anaphylatoxin chemotactic receptor C5L2 OS=Homo sapiens GN=GPR77 PE=2 SV=1 - [C5ARL_HUMAN]                        | 6.23  | 1 | 1  | 1  | 5   | 0.69 | 0.57 | 0.56 | 0.47 |      |      |      |      | 337  | 36.1  | 7.87  |
| P21730 | C5a anaphylatoxin chemotactic receptor OS=Homo sapiens GN=C5AR1 PE=1 SV=2 - [C5AR_HUMAN]                              | 3.71  | 1 | 1  | 1  | 1   |      |      |      |      | 0.48 | 0.81 | 0.55 | 0.92 | 350  | 39.3  | 9.01  |
| O75844 | CAAX prenyl protease 1 homolog OS=Homo sapiens GN=ZMPSTE24 PE=1 SV=2 - [FACE1_HUMAN]                                  | 3.37  | 4 | 1  | 2  | 6   |      |      |      |      | 1.64 | 0.92 | 2.07 | 1.17 | 475  | 54.8  | 7.49  |
| Q9NYQ6 | Cadherin EGF LAG seven-pass G-type receptor 1 OS=Homo sapiens GN=CELSR1 PE=1 SV=1 - [CELR1_HUMAN]                     | 2.55  | 1 | 5  | 5  | 7   | 0.97 | 1.00 | 1.01 | 1.05 | 1.13 | 1.08 | 1.09 | 1.04 | 3014 | 329.3 | 5.92  |
| Q9NYQ7 | Cadherin EGF LAG seven-pass G-type receptor 3 OS=Homo sapiens GN=CELSR3 PE=1 SV=2 - [CELR3_HUMAN]                     | 1.21  | 1 | 2  | 2  | 2   | 0.95 | 1.06 | 1.07 | 1.20 |      |      |      |      | 3312 | 358.0 | 6.68  |
| P12830 | Cadherin-1 OS=Homo sapiens GN=CDH1 PE=1 SV=3 - [CADH1_HUMAN]                                                          | 10.32 | 1 | 7  | 8  | 21  | 0.96 | 1.04 | 0.98 | 1.07 | 1.02 | 1.13 | 1.02 | 1.10 | 882  | 97.4  | 4.73  |
| P55290 | Cadherin-13 OS=Homo sapiens GN=CDH13 PE=1 SV=1 - [CAD13_HUMAN]                                                        | 14.73 | 1 | 8  | 8  | 41  | 0.93 | 0.82 | 0.90 | 0.79 | 0.87 | 0.82 | 0.97 | 0.91 | 713  | 78.2  | 4.98  |

|        |                                                                                                                              |       |   |   |   |     |      |      |      |      |      |      |      |      |      |       |      |
|--------|------------------------------------------------------------------------------------------------------------------------------|-------|---|---|---|-----|------|------|------|------|------|------|------|------|------|-------|------|
| P55291 | Cadherin-15 OS=Homo sapiens GN=CDH15 PE=1 SV=1 - [CAD15_HUMAN]                                                               | 1.84  | 1 | 1 | 1 | 1   |      |      |      |      | 1.02 | 1.13 | 0.86 | 0.95 | 814  | 88.9  | 4.98 |
| Q9H159 | Cadherin-19 OS=Homo sapiens GN=CDH19 PE=2 SV=1 - [CAD19_HUMAN]                                                               | 1.42  | 1 | 1 | 1 | 1   |      |      |      |      | 5.04 | 2.88 | 1.19 | 0.68 | 772  | 86.9  | 4.73 |
| P19022 | Cadherin-2 OS=Homo sapiens GN=CDH2 PE=1 SV=4 - [CADH2_HUMAN]                                                                 | 7.28  | 1 | 4 | 4 | 10  | 1.03 | 0.97 | 1.05 | 1.00 | 0.89 | 0.92 | 0.98 | 1.02 | 906  | 99.7  | 4.81 |
| Q9H251 | Cadherin-23 OS=Homo sapiens GN=CDH23 PE=1 SV=1 - [CAD23_HUMAN]                                                               | 0.75  | 1 | 1 | 1 | 4   | 0.73 | 0.51 | 0.67 | 0.47 |      |      |      |      | 3354 | 369.3 | 4.67 |
| P22223 | Cadherin-3 OS=Homo sapiens GN=CDH3 PE=1 SV=2 - [CADH3_HUMAN]                                                                 | 2.77  | 1 | 1 | 2 | 2   | 0.76 | 0.94 | 0.73 | 0.90 |      |      |      |      | 829  | 91.4  | 4.75 |
| P33151 | Cadherin-5 OS=Homo sapiens GN=CDH5 PE=1 SV=5 - [CADH5_HUMAN]                                                                 | 14.29 | 1 | 9 | 9 | 76  | 0.98 | 1.02 | 0.93 | 0.97 | 0.88 | 0.86 | 0.91 | 0.88 | 784  | 87.5  | 5.43 |
| P55285 | Cadherin-6 OS=Homo sapiens GN=CDH6 PE=1 SV=1 - [CADH6_HUMAN]                                                                 | 3.42  | 1 | 2 | 2 | 5   |      |      |      |      | 0.99 | 1.04 | 0.99 | 1.03 | 790  | 88.3  | 4.93 |
| Q9ULB5 | Cadherin-7 OS=Homo sapiens GN=CDH7 PE=2 SV=2 - [CADH7_HUMAN]                                                                 | 1.78  | 1 | 1 | 1 | 1   | 0.64 | 0.67 |      |      |      |      |      |      | 785  | 87.0  | 4.81 |
| P55286 | Cadherin-8 OS=Homo sapiens GN=CDH8 PE=1 SV=2 - [CADH8_HUMAN]                                                                 | 8.01  | 1 | 3 | 3 | 3   |      |      |      |      | 0.85 | 1.06 | 1.01 | 1.26 | 799  | 88.2  | 4.70 |
| Q9BYE9 | Cadherin-related family member 2 OS=Homo sapiens GN=CDHR2 PE=1 SV=2 - [CDHR2_HUMAN]                                          | 3.05  | 1 | 3 | 3 | 5   | 0.55 | 0.53 | 0.54 | 0.52 |      |      |      |      | 1310 | 141.5 | 4.50 |
| Q9Y6J0 | Calcineurin-binding protein cabin-1 OS=Homo sapiens GN=CABIN1 PE=1 SV=1 - [CABIN_HUMAN]                                      | 1.53  | 1 | 2 | 2 | 3   | 1.96 | 1.05 |      |      |      |      |      |      | 2220 | 246.2 | 6.02 |
| P30988 | Calcitonin receptor OS=Homo sapiens GN=CALCR PE=1 SV=1 - [CALCR_HUMAN]                                                       | 1.22  | 1 | 1 | 1 | 1   |      |      |      |      | 0.71 | 1.04 | 0.91 | 1.32 | 490  | 57.3  | 8.60 |
| Q86XJ0 | Calcium homeostasis modulator protein 3 OS=Homo sapiens GN=CALHM3 PE=2 SV=1 - [CAHM3_HUMAN]                                  | 4.57  | 1 | 1 | 1 | 1   |      |      |      |      | 0.85 | 1.25 | 0.88 | 1.30 | 350  | 39.1  | 8.53 |
| P49069 | Calcium signal-modulating cyclophilin ligand OS=Homo sapiens GN=CAMLG PE=1 SV=1 - [CAMLG_HUMAN]                              | 3.72  | 1 | 1 | 1 | 1   |      |      |      |      | 0.86 | 0.85 | 0.91 | 0.89 | 296  | 32.9  | 8.05 |
| Q9NPA1 | Calcium-activated potassium channel subunit beta-3 OS=Homo sapiens GN=KCNMB3 PE=1 SV=2 - [KCMB3_HUMAN]                       | 11.47 | 1 | 1 | 1 | 1   | 0.97 | 1.06 |      |      |      |      |      |      | 279  | 31.6  | 7.28 |
| Q9P1Z2 | Calcium-binding and coiled-coil domain-containing protein 1 OS=Homo sapiens GN=CALCOCO1 PE=1 SV=2 - [CACO1_HUMAN]            | 7.24  | 1 | 3 | 3 | 3   | 1.36 | 1.50 | 0.85 | 0.94 | 0.92 | 0.83 | 0.91 | 0.82 | 691  | 77.3  | 4.82 |
| Q96KC9 | Calcium-binding and spermatid-specific protein 1 OS=Homo sapiens GN=CABS1 PE=2 SV=3 - [CABS1_HUMAN]                          | 2.03  | 1 | 1 | 1 | 1   | 1.22 | 1.50 | 1.25 | 1.54 |      |      |      |      | 395  | 43.0  | 4.21 |
| O75746 | Calcium-binding mitochondrial carrier protein Aralar1 OS=Homo sapiens GN=SLC25A12 PE=1 SV=2 - [CMC1_HUMAN]                   | 1.77  | 1 | 1 | 1 | 1   |      |      |      |      | 1.07 | 1.04 | 0.98 | 0.95 | 678  | 74.7  | 8.38 |
| Q9UJS0 | Calcium-binding mitochondrial carrier protein Aralar2 OS=Homo sapiens GN=SLC25A13 PE=1 SV=2 - [CMC2_HUMAN]                   | 4.59  | 1 | 1 | 1 | 1   |      |      |      |      | 1.70 | 2.09 | 1.71 | 2.10 | 675  | 74.1  | 8.62 |
| Q6KCM7 | Calcium-binding mitochondrial carrier protein SCaMC-2 OS=Homo sapiens GN=SLC25A25 PE=1 SV=1 - [SCMC2_HUMAN]                  | 3.20  | 1 | 1 | 1 | 4   | 1.00 | 1.44 | 0.52 | 0.75 |      |      |      |      | 469  | 52.6  | 8.35 |
| Q9Y376 | Calcium-binding protein 39 OS=Homo sapiens GN=CAB39 PE=1 SV=1 - [CAB39_HUMAN]                                                | 3.23  | 1 | 1 | 1 | 1   |      |      |      |      | 0.30 | 0.33 | 0.29 | 0.33 | 341  | 39.8  | 6.89 |
| Q9H9S4 | Calcium-binding protein 39-like OS=Homo sapiens GN=CAB39L PE=1 SV=3 - [CB39L_HUMAN]                                          | 2.67  | 1 | 1 | 1 | 3   | 0.66 | 0.85 | 0.59 | 0.77 | 0.77 | 0.66 | 0.79 | 0.69 | 337  | 39.1  | 8.40 |
| Q9BXU9 | Calcium-binding protein 8 OS=Homo sapiens GN=CALN1 PE=2 SV=1 - [CABP8_HUMAN]                                                 | 9.59  | 1 | 1 | 1 | 1   | 1.64 | 1.23 | 1.78 | 1.35 |      |      |      |      | 219  | 24.8  | 4.84 |
| Q86UW7 | Calcium-dependent secretion activator 2 OS=Homo sapiens GN=CADPS2 PE=1 SV=2 - [CAPS2_HUMAN]                                  | 1.62  | 1 | 2 | 2 | 162 | 1.10 | 0.87 | 1.12 | 0.91 | 1.00 | 0.91 | 0.97 | 0.88 | 1296 | 147.6 | 6.19 |
| Q9NP80 | Calcium-independent phospholipase A2-gamma OS=Homo sapiens GN=PNPLA8 PE=1 SV=1 - [PLPL8_HUMAN]                               | 1.28  | 1 | 1 | 1 | 3   | 0.97 | 0.90 | 0.95 | 0.89 | 0.91 | 0.75 | 0.96 | 0.80 | 782  | 88.4  | 9.23 |
| Q9Y2V2 | Calcium-regulated heat stable protein 1 OS=Homo sapiens GN=CARHSP1 PE=1 SV=2 - [CHSP1_HUMAN]                                 | 7.48  | 1 | 1 | 1 | 2   |      |      |      |      | 1.09 | 1.14 | 1.00 | 1.03 | 147  | 15.9  | 8.21 |
| Q01064 | Calcium/calmodulin-dependent 3',5'-cyclic nucleotide phosphodiesterase 1B OS=Homo sapiens GN=PDE1B PE=1 SV=2 - [PDE1B_HUMAN] | 4.29  | 1 | 1 | 1 | 3   | 1.09 | 1.08 | 0.99 | 1.00 |      |      |      |      | 536  | 61.3  | 5.52 |

|        |                                                                                                                              |       |   |    |    |    |      |      |      |      |      |      |      |      |     |       |      |
|--------|------------------------------------------------------------------------------------------------------------------------------|-------|---|----|----|----|------|------|------|------|------|------|------|------|-----|-------|------|
| Q14123 | Calcium/calmodulin-dependent 3',5'-cyclic nucleotide phosphodiesterase 1C OS=Homo sapiens GN=PDE1C PE=1 SV=1 - [PDE1C_HUMAN] | 3.81  | 1 | 2  | 2  | 2  |      |      |      |      | 0.63 | 0.96 | 0.88 | 1.33 | 709 | 80.7  | 8.82 |
| Q6P2M8 | Calcium/calmodulin-dependent protein kinase type 1B OS=Homo sapiens GN=PNCK PE=2 SV=2 - [KCC1B_HUMAN]                        | 1.75  | 1 | 1  | 1  | 7  |      |      |      |      | 1.21 | 1.37 | 1.04 | 1.16 | 343 | 38.5  | 6.76 |
| Q8IU85 | Calcium/calmodulin-dependent protein kinase type 1D OS=Homo sapiens GN=CAMK1D PE=1 SV=1 - [KCC1D_HUMAN]                      | 3.90  | 3 | 1  | 2  | 21 |      |      |      |      | 1.36 | 1.33 | 1.36 | 1.34 | 385 | 42.9  | 7.21 |
| Q13557 | Calcium/calmodulin-dependent protein kinase type II subunit delta OS=Homo sapiens GN=CAMK2D PE=1 SV=3 - [KCC2D_HUMAN]        | 2.61  | 1 | 1  | 1  | 3  | 1.18 | 0.89 | 0.95 | 0.71 |      |      |      |      | 499 | 56.3  | 7.25 |
| Q13938 | Calcyphosin OS=Homo sapiens GN=CAPS PE=1 SV=1 - [CAYP1_HUMAN]                                                                | 7.94  | 4 | 1  | 2  | 5  | 0.92 | 1.99 | 0.61 | 1.32 |      |      |      |      | 189 | 21.0  | 4.89 |
| Q05682 | Caldesmon OS=Homo sapiens GN=CALD1 PE=1 SV=3 - [CALD1_HUMAN]                                                                 | 16.39 | 1 | 12 | 12 | 34 |      |      |      |      | 1.81 | 1.73 | 1.80 | 1.75 | 793 | 93.2  | 5.66 |
| Q13939 | Calicin OS=Homo sapiens GN=CCIN PE=2 SV=3 - [CALL_HUMAN]                                                                     | 1.36  | 1 | 1  | 1  | 1  |      |      |      |      | 1.21 | 0.96 | 1.10 | 0.87 | 588 | 66.5  | 8.18 |
| P62158 | Calmodulin OS=Homo sapiens GN=CALM1 PE=1 SV=2 - [CALM_HUMAN]                                                                 | 11.41 | 2 | 2  | 2  | 3  | 0.57 | 0.49 | 0.57 | 0.50 | 0.26 | 0.57 | 0.29 | 0.64 | 149 | 16.8  | 4.22 |
| Q96L46 | Calpain small subunit 2 OS=Homo sapiens GN=CAPNS2 PE=2 SV=2 - [CPNS2_HUMAN]                                                  | 4.44  | 1 | 1  | 1  | 1  |      |      |      |      | 2.14 | 1.64 | 2.25 | 1.72 | 248 | 27.6  | 5.73 |
| P07384 | Calpain-1 catalytic subunit OS=Homo sapiens GN=CAPN1 PE=1 SV=1 - [CAN1_HUMAN]                                                | 2.52  | 1 | 1  | 1  | 2  | 0.76 | 0.80 | 0.75 | 0.78 |      |      |      |      | 714 | 81.8  | 5.67 |
| Q6ZSI9 | Calpain-12 OS=Homo sapiens GN=CAPN12 PE=2 SV=1 - [CAN12_HUMAN]                                                               | 3.62  | 1 | 1  | 1  | 1  | 2.93 | 3.91 | 2.93 | 3.92 |      |      |      |      | 719 | 81.0  | 6.38 |
| P20807 | Calpain-3 OS=Homo sapiens GN=CAPN3 PE=1 SV=2 - [CAN3_HUMAN]                                                                  | 5.97  | 1 | 2  | 2  | 2  | 1.05 | 1.14 | 1.26 | 1.38 |      |      |      |      | 821 | 94.2  | 6.18 |
| O15484 | Calpain-5 OS=Homo sapiens GN=CAPN5 PE=1 SV=2 - [CAN5_HUMAN]                                                                  | 3.44  | 1 | 1  | 1  | 2  |      |      |      |      | 0.21 | 0.15 | 1.14 | 0.79 | 640 | 73.1  | 7.64 |
| A6NHC0 | Calpain-8 OS=Homo sapiens GN=CAPN8 PE=2 SV=3 - [CAN8_HUMAN]                                                                  | 4.69  | 1 | 2  | 2  | 8  | 0.75 | 0.59 | 0.84 | 0.67 | 1.11 | 0.94 | 1.12 | 0.96 | 703 | 79.1  | 5.22 |
| P20810 | Calpastatin OS=Homo sapiens GN=CAST PE=1 SV=4 - [ICAL_HUMAN]                                                                 | 4.80  | 1 | 1  | 1  | 1  | 1.24 | 0.96 | 1.21 | 0.95 |      |      |      |      | 708 | 76.5  | 5.07 |
| P51911 | Calponin-1 OS=Homo sapiens GN=CNN1 PE=1 SV=2 - [CNN1_HUMAN]                                                                  | 15.15 | 1 | 2  | 2  | 3  | 1.40 | 1.62 | 1.08 | 1.26 | 1.06 | 0.52 | 1.32 | 0.64 | 297 | 33.1  | 9.07 |
| Q99439 | Calponin-2 OS=Homo sapiens GN=CNN2 PE=1 SV=4 - [CNN2_HUMAN]                                                                  | 27.18 | 1 | 7  | 7  | 27 | 0.80 | 0.78 | 0.79 | 0.79 | 1.07 | 1.05 | 0.99 | 0.92 | 309 | 33.7  | 7.33 |
| P27797 | Calreticulin OS=Homo sapiens GN=CALR PE=1 SV=1 - [CALR_HUMAN]                                                                | 5.04  | 1 | 1  | 1  | 1  | 0.73 | 0.66 | 0.61 | 0.55 |      |      |      |      | 417 | 48.1  | 4.44 |
| P22676 | Calretinin OS=Homo sapiens GN=CALB2 PE=1 SV=2 - [CALB2_HUMAN]                                                                | 7.01  | 1 | 1  | 1  | 2  |      |      |      |      | 1.10 | 1.18 | 0.97 | 1.04 | 271 | 31.5  | 5.15 |
| O94985 | Calsynenin-1 OS=Homo sapiens GN=CLSTN1 PE=1 SV=1 - [CSTN1_HUMAN]                                                             | 5.20  | 1 | 4  | 4  | 13 | 1.10 | 1.06 | 1.09 | 1.07 | 1.05 | 1.07 | 1.00 | 1.01 | 981 | 109.7 | 4.91 |
| O43852 | Calumenin OS=Homo sapiens GN=CALU PE=1 SV=2 - [CALU_HUMAN]                                                                   | 6.35  | 1 | 2  | 2  | 4  | 0.87 | 0.68 | 0.83 | 0.66 | 0.96 | 1.11 | 1.02 | 1.18 | 315 | 37.1  | 4.64 |
| Q8NCB2 | CaM kinase-like vesicle-associated protein OS=Homo sapiens GN=CAMKV PE=2 SV=2 - [CAMKV_HUMAN]                                | 2.79  | 1 | 1  | 1  | 1  |      |      |      |      | 0.47 | 0.56 | 0.92 | 1.10 | 501 | 54.3  | 5.55 |
| Q9Y233 | cAMP and cAMP-inhibited cGMP 3',5'-cyclic phosphodiesterase 10A OS=Homo sapiens GN=PDE10A PE=1 SV=1 - [PDE10_HUMAN]          | 1.80  | 1 | 1  | 1  | 1  | 0.82 | 1.02 | 0.71 | 0.88 |      |      |      |      | 779 | 88.4  | 6.60 |
| P10644 | cAMP-dependent protein kinase type I-alpha regulatory subunit OS=Homo sapiens GN=PRKAR1A PE=1 SV=1 - [KAPO_HUMAN]            | 5.51  | 1 | 2  | 2  | 3  |      |      |      |      | 0.90 | 0.75 | 0.91 | 0.75 | 381 | 43.0  | 5.35 |
| P31321 | cAMP-dependent protein kinase type I-beta regulatory subunit OS=Homo sapiens GN=PRKAR1B PE=1 SV=4 - [KAP1_HUMAN]             | 2.36  | 1 | 1  | 1  | 2  |      |      |      |      | 0.46 | 0.45 | 0.80 | 0.64 | 381 | 43.0  | 5.71 |
| Q07343 | cAMP-specific 3',5'-cyclic phosphodiesterase 4B OS=Homo sapiens GN=PDE4B PE=1 SV=1 - [PDE4B_HUMAN]                           | 3.13  | 1 | 1  | 1  | 2  |      |      |      |      | 1.29 | 1.76 | 1.02 | 1.39 | 736 | 83.3  | 5.25 |
| Q08499 | cAMP-specific 3',5'-cyclic phosphodiesterase 4D OS=Homo sapiens GN=PDE4D PE=1 SV=2 - [PDE4D_HUMAN]                           | 1.11  | 1 | 1  | 1  | 2  |      |      |      |      | 2.15 | 1.83 | 1.82 | 1.56 | 809 | 91.1  | 5.54 |



|        |                                                                                                         |       |   |    |    |     |      |      |      |      |      |      |      |      |      |       |       |
|--------|---------------------------------------------------------------------------------------------------------|-------|---|----|----|-----|------|------|------|------|------|------|------|------|------|-------|-------|
| Q92887 | Canalicular multispecific organic anion transporter 1 OS=Homo sapiens GN=ABCC2 PE=1 SV=3 - [MRP2_HUMAN] | 1.94  | 1 | 2  | 2  | 12  | 0.73 | 0.97 | 0.70 | 0.80 | 1.17 | 1.16 | 1.15 | 1.14 | 1545 | 174.1 | 8.32  |
| Q6PK30 | Cancer/testis antigen 75 OS=Homo sapiens GN=CT75 PE=2 SV=2 - [CT75_HUMAN]                               | 3.97  | 1 | 1  | 1  | 1   | 0.91 | 0.99 | 0.93 | 1.03 |      |      |      |      | 378  | 40.6  | 10.98 |
| P30622 | CAP-Gly domain-containing linker protein 1 OS=Homo sapiens GN=CLIP1 PE=1 SV=2 - [CLIP1_HUMAN]           | 2.64  | 1 | 3  | 3  | 3   | 0.71 | 0.82 | 0.75 | 0.88 | 1.75 | 1.64 | 1.75 | 1.63 | 1438 | 162.1 | 5.36  |
| Q9UDT6 | CAP-Gly domain-containing linker protein 2 OS=Homo sapiens GN=CLIP2 PE=1 SV=1 - [CLIP2_HUMAN]           | 1.63  | 1 | 1  | 1  | 3   |      |      |      |      | 1.47 | 1.59 | 1.18 | 1.28 | 1046 | 115.8 | 6.73  |
| Q8N3C7 | CAP-Gly domain-containing linker protein 4 OS=Homo sapiens GN=CLIP4 PE=1 SV=1 - [CLIP4_HUMAN]           | 1.13  | 1 | 1  | 1  | 1   | 3.34 | 0.89 |      |      |      |      |      |      | 705  | 76.3  | 8.70  |
| Q6IMN6 | Caprin-2 OS=Homo sapiens GN=CAPRIN2 PE=1 SV=1 - [CAPR2_HUMAN]                                           | 2.31  | 1 | 1  | 1  | 2   | 0.90 | 0.86 | 0.91 | 0.88 |      |      |      |      | 1127 | 125.8 | 6.71  |
| Q8IV04 | Carabin OS=Homo sapiens GN=TBC1D10C PE=1 SV=1 - [TB10C_HUMAN]                                           | 2.24  | 1 | 1  | 1  | 2   |      |      |      |      | 0.74 | 0.74 | 0.85 | 0.84 | 446  | 49.7  | 8.76  |
| P31327 | Carbamoyl-phosphate synthase [ammonia], mitochondrial OS=Homo sapiens GN=CPS1 PE=1 SV=2 - [CPSM_HUMAN]  | 1.47  | 1 | 2  | 2  | 7   | 0.77 | 0.73 | 0.77 | 0.77 | 1.06 | 1.04 | 1.04 | 1.03 | 1500 | 164.8 | 6.74  |
| Q7LGC8 | Carbohydrate sulfotransferase 3 OS=Homo sapiens GN=CHST3 PE=1 SV=3 - [CHST3_HUMAN]                      | 3.34  | 1 | 1  | 1  | 1   |      |      |      |      | 1.09 | 0.74 | 1.09 | 0.74 | 479  | 54.7  | 8.59  |
| Q7L1S5 | Carbohydrate sulfotransferase 9 OS=Homo sapiens GN=CHST9 PE=2 SV=2 - [CHST9_HUMAN]                      | 2.03  | 1 | 1  | 1  | 1   | 1.03 | 0.99 | 1.07 | 1.03 |      |      |      |      | 443  | 52.0  | 9.38  |
| P00915 | Carbonic anhydrase 1 OS=Homo sapiens GN=CA1 PE=1 SV=2 - [CAH1_HUMAN]                                    | 32.57 | 1 | 6  | 6  | 74  | 0.78 | 0.81 | 0.78 | 0.80 | 0.67 | 0.70 | 0.62 | 0.66 | 261  | 28.9  | 7.12  |
| P00918 | Carbonic anhydrase 2 OS=Homo sapiens GN=CA2 PE=1 SV=2 - [CAH2_HUMAN]                                    | 25.00 | 1 | 5  | 5  | 34  | 0.95 | 0.81 | 0.86 | 0.75 | 0.76 | 0.77 | 0.73 | 0.74 | 260  | 29.2  | 7.40  |
| P07451 | Carbonic anhydrase 3 OS=Homo sapiens GN=CA3 PE=1 SV=3 - [CAH3_HUMAN]                                    | 6.54  | 1 | 1  | 1  | 1   | 0.85 | 0.78 | 0.98 | 0.90 |      |      |      |      | 260  | 29.5  | 7.34  |
| P23280 | Carbonic anhydrase 6 OS=Homo sapiens GN=CA6 PE=1 SV=3 - [CAH6_HUMAN]                                    | 1.95  | 1 | 1  | 1  | 5   | 0.96 | 0.93 | 0.99 | 0.98 | 0.87 | 1.05 | 0.99 | 1.23 | 308  | 35.3  | 7.02  |
| P43166 | Carbonic anhydrase 7 OS=Homo sapiens GN=CA7 PE=1 SV=1 - [CAH7_HUMAN]                                    | 3.41  | 1 | 1  | 1  | 1   | 0.96 | 1.07 | 0.96 | 1.07 |      |      |      |      | 264  | 29.6  | 7.42  |
| O75493 | Carbonic anhydrase-related protein 11 OS=Homo sapiens GN=CA11 PE=1 SV=2 - [CAH11_HUMAN]                 | 8.84  | 1 | 1  | 1  | 1   | 0.95 | 1.02 | 0.95 | 1.02 |      |      |      |      | 328  | 36.2  | 9.74  |
| P16152 | Carbonyl reductase [NADPH] 1 OS=Homo sapiens GN=CBR1 PE=1 SV=3 - [CBR1_HUMAN]                           | 11.19 | 1 | 2  | 3  | 8   | 0.99 | 0.97 | 1.04 | 1.02 | 1.96 | 2.01 | 1.69 | 1.74 | 277  | 30.4  | 8.32  |
| O75828 | Carbonyl reductase [NADPH] 3 OS=Homo sapiens GN=CBR3 PE=1 SV=3 - [CBR3_HUMAN]                           | 7.22  | 1 | 1  | 2  | 4   |      |      |      |      | 1.01 | 1.34 | 1.05 | 1.39 | 277  | 30.8  | 6.18  |
| Q6UWW8 | Carboxylesterase 3 OS=Homo sapiens GN=CES3 PE=1 SV=1 - [EST3_HUMAN]                                     | 3.33  | 1 | 1  | 1  | 1   |      |      |      |      | 6.19 | 6.59 | 5.90 | 6.29 | 571  | 62.2  | 5.62  |
| Q5XG92 | Carboxylesterase 4A OS=Homo sapiens GN=CES4A PE=2 SV=2 - [EST4A_HUMAN]                                  | 2.32  | 1 | 1  | 1  | 1   | 0.61 | 0.23 | 0.83 | 0.31 |      |      |      |      | 561  | 63.5  | 9.31  |
| Q96IY4 | Carboxypeptidase B2 OS=Homo sapiens GN=CPB2 PE=1 SV=2 - [CBPB2_HUMAN]                                   | 25.30 | 1 | 11 | 12 | 138 | 1.01 | 1.05 | 1.03 | 1.07 | 1.18 | 1.10 | 1.16 | 1.15 | 423  | 48.4  | 7.71  |
| P14384 | Carboxypeptidase M OS=Homo sapiens GN=CPM PE=1 SV=2 - [CBPM_HUMAN]                                      | 1.35  | 1 | 1  | 1  | 1   | 1.34 | 1.49 | 1.39 | 1.56 |      |      |      |      | 443  | 50.5  | 7.36  |
| P15169 | Carboxypeptidase N catalytic chain OS=Homo sapiens GN=CPN1 PE=1 SV=1 - [CBPN_HUMAN]                     | 39.52 | 1 | 14 | 14 | 112 | 1.03 | 1.03 | 1.02 | 1.04 | 0.87 | 0.86 | 0.88 | 0.86 | 458  | 52.3  | 7.34  |
| P22792 | Carboxypeptidase N subunit 2 OS=Homo sapiens GN=CPN2 PE=1 SV=3 - [CPN2_HUMAN]                           | 40.73 | 1 | 16 | 16 | 323 | 1.08 | 1.08 | 1.08 | 1.09 | 1.02 | 1.09 | 0.98 | 1.01 | 545  | 60.5  | 5.99  |
| Q9Y646 | Carboxypeptidase Q OS=Homo sapiens GN=CPQ PE=1 SV=1 - [CBPQ_HUMAN]                                      | 9.11  | 1 | 3  | 4  | 9   | 1.03 | 1.14 | 0.85 | 0.99 |      |      |      |      | 472  | 51.9  | 6.18  |
| Q66K79 | Carboxypeptidase Z OS=Homo sapiens GN=CPZ PE=1 SV=2 - [CBPZ_HUMAN]                                      | 2.91  | 1 | 1  | 1  | 3   | 2.28 | 2.17 | 2.39 | 2.29 |      |      |      |      | 652  | 73.6  | 7.97  |
| Q8N3K9 | Cardiomyopathy-associated protein 5 OS=Homo sapiens GN=CMYA5 PE=1 SV=3 - [CMYA5_HUMAN]                  | 1.92  | 3 | 4  | 5  | 5   | 0.87 | 1.01 | 0.76 | 0.89 |      |      |      |      | 4069 | 448.9 | 4.78  |

|        |                                                                                                         |       |   |    |    |    |      |      |      |      |      |      |      |      |      |       |      |      |     |      |      |
|--------|---------------------------------------------------------------------------------------------------------|-------|---|----|----|----|------|------|------|------|------|------|------|------|------|-------|------|------|-----|------|------|
| Q9UBD9 | Cardiotrophin-like cytokine factor 1 OS=Homo sapiens<br>GN=CLCF1 PE=1 SV=1 - [CLCF1_HUMAN]              | 7.56  | 1 | 1  | 1  | 1  |      |      |      |      |      |      |      |      | 1.90 | 2.06  | 1.66 | 1.80 | 225 | 25.2 | 8.46 |
| P43155 | Carnitine O-acetyltransferase OS=Homo sapiens GN=CRAT<br>PE=1 SV=5 - [CACP_HUMAN]                       | 2.08  | 9 | 1  | 2  | 2  | 1.01 | 1.03 | 1.03 | 1.05 |      |      |      |      |      |       |      |      | 626 | 70.8 | 8.44 |
| Q8TCG5 | Carnitine O-palmitoyltransferase 1, brain isoform OS=Homo sapiens GN=CPT1C PE=2 SV=1 - [CPT1C_HUMAN]    | 1.00  | 1 | 1  | 1  | 1  |      |      |      |      |      |      |      |      | 1.01 | 0.61  | 1.31 | 0.80 | 803 | 90.9 | 8.12 |
| P23786 | Carnitine O-palmitoyltransferase 2, mitochondrial OS=Homo sapiens GN=CPT2 PE=1 SV=2 - [CPT2_HUMAN]      | 3.80  | 1 | 1  | 1  | 1  | 2.18 | 1.11 | 2.84 | 1.45 |      |      |      |      |      |       |      |      | 658 | 73.7 | 8.18 |
| Q9NQ79 | Cartilage acidic protein 1 OS=Homo sapiens GN=CRTAC1<br>PE=1 SV=2 - [CRAC1_HUMAN]                       | 32.68 | 1 | 17 | 17 | 94 | 1.15 | 1.18 | 1.15 | 1.18 | 1.04 | 1.02 | 1.04 | 1.09 | 661  | 71.4  | 5.12 |      |     |      |      |
| O75339 | Cartilage intermediate layer protein 1 OS=Homo sapiens<br>GN=CILP PE=1 SV=4 - [CILP1_HUMAN]             | 1.60  | 3 | 1  | 3  | 6  | 0.90 | 1.00 | 0.86 | 0.97 | 1.27 | 0.83 | 1.19 | 0.78 | 1184 | 132.5 | 8.41 |      |     |      |      |
| Q8IUL8 | Cartilage intermediate layer protein 2 OS=Homo sapiens<br>GN=CILP2 PE=2 SV=2 - [CILP2_HUMAN]            | 3.37  | 1 | 3  | 4  | 6  | 1.07 | 1.10 | 1.07 | 1.11 |      |      |      |      | 1156 | 126.2 | 8.22 |      |     |      |      |
| P21941 | Cartilage matrix protein OS=Homo sapiens GN=MATN1 PE=1<br>SV=1 - [MATN1_HUMAN]                          | 2.82  | 1 | 1  | 1  | 3  | 0.86 | 1.18 | 0.89 | 1.23 |      |      |      |      | 496  | 53.7  | 7.69 |      |     |      |      |
| P49747 | Cartilage oligomeric matrix protein OS=Homo sapiens<br>GN=COMP PE=1 SV=2 - [COMP_HUMAN]                 | 28.93 | 1 | 14 | 16 | 70 | 0.81 | 0.77 | 0.83 | 0.79 | 0.75 | 0.84 | 0.80 | 0.90 | 757  | 82.8  | 4.60 |      |     |      |      |
| Q9NQ75 | Cas scaffolding protein family member 4 OS=Homo sapiens<br>GN=CASS4 PE=1 SV=2 - [CASS4_HUMAN]           | 2.42  | 1 | 1  | 1  | 2  |      |      |      |      |      |      |      |      | 1.49 | 1.44  | 1.42 | 1.38 | 786 | 87.1 | 7.08 |
| Q96PB1 | CAS1 domain-containing protein 1 OS=Homo sapiens<br>GN=CASD1 PE=2 SV=1 - [CASD1_HUMAN]                  | 4.89  | 1 | 2  | 2  | 3  | 1.67 | 1.20 | 1.62 | 1.17 | 0.77 | 0.83 | 0.99 | 1.07 | 797  | 91.6  | 8.82 |      |     |      |      |
| P48729 | Casein kinase I isoform alpha OS=Homo sapiens<br>GN=CSNK1A1 PE=1 SV=2 - [KC1A_HUMAN]                    | 10.68 | 1 | 2  | 2  | 4  | 1.51 | 1.18 | 1.52 | 1.21 | 1.26 | 1.03 | 1.21 | 0.99 | 337  | 38.9  | 9.57 |      |     |      |      |
| P48730 | Casein kinase I isoform delta OS=Homo sapiens<br>GN=CSNK1D PE=1 SV=2 - [KC1D_HUMAN]                     | 5.06  | 1 | 1  | 1  | 2  |      |      |      |      |      |      | 0.41 |      | 415  | 47.3  | 9.74 |      |     |      |      |
| Q9Y6M4 | Casein kinase I isoform gamma-3 OS=Homo sapiens<br>GN=CSNK1G3 PE=1 SV=2 - [KC1G3_HUMAN]                 | 4.25  | 1 | 1  | 1  | 1  | 1.23 | 1.15 | 1.22 | 1.14 |      |      |      |      | 447  | 51.4  | 9.22 |      |     |      |      |
| Q9BWT7 | Caspase recruitment domain-containing protein 10 OS=Homo sapiens<br>GN=CARD10 PE=2 SV=2 - [CAR10_HUMAN] | 3.10  | 1 | 2  | 2  | 3  | 0.65 | 1.44 | 0.59 | 1.32 | 0.69 | 0.71 | 3.70 | 3.99 | 1032 | 115.9 | 5.95 |      |     |      |      |
| Q9BXL7 | Caspase recruitment domain-containing protein 11 OS=Homo sapiens<br>GN=CARD11 PE=1 SV=3 - [CAR11_HUMAN] | 0.61  | 1 | 1  | 1  | 1  | 0.76 | 0.63 | 0.76 | 0.64 |      |      |      |      | 1154 | 133.2 | 6.09 |      |     |      |      |
| Q9BXL6 | Caspase recruitment domain-containing protein 14 OS=Homo sapiens<br>GN=CARD14 PE=1 SV=2 - [CAR14_HUMAN] | 1.10  | 1 | 1  | 1  | 2  | 1.13 | 1.16 | 0.96 | 0.98 | 1.52 | 1.43 | 1.70 | 1.59 | 1004 | 113.2 | 5.92 |      |     |      |      |
| Q9BX69 | Caspase recruitment domain-containing protein 6 OS=Homo sapiens<br>GN=CARD6 PE=1 SV=2 - [CARD6_HUMAN]   | 1.25  | 1 | 1  | 1  | 2  | 1.49 | 1.02 | 1.38 | 0.95 |      |      |      |      | 1037 | 116.4 | 6.37 |      |     |      |      |
| P31944 | Caspase-14 OS=Homo sapiens GN=CASP14 PE=1 SV=2 -<br>[CASPE_HUMAN]                                       | 19.01 | 1 | 5  | 5  | 11 | 0.79 | 0.73 | 0.67 | 0.62 | 0.81 | 0.75 | 0.92 | 0.84 | 242  | 27.7  | 5.58 |      |     |      |      |
| P51878 | Caspase-5 OS=Homo sapiens GN=CASP5 PE=2 SV=3 -<br>[CASP5_HUMAN]                                         | 1.84  | 1 | 1  | 1  | 1  | 0.82 | 0.71 | 0.84 | 0.74 |      |      |      |      | 434  | 49.7  | 9.16 |      |     |      |      |
| Q14790 | Caspase-8 OS=Homo sapiens GN=CASP8 PE=1 SV=1 -<br>[CASP8_HUMAN]                                         | 3.34  | 2 | 1  | 2  | 2  | 1.28 | 1.38 | 1.22 | 1.33 |      |      |      |      | 479  | 55.4  | 5.10 |      |     |      |      |
| Q9BXF3 | Cat eye syndrome critical region protein 2 OS=Homo sapiens<br>GN=CECR2 PE=1 SV=2 - [CECR2_HUMAN]        | 2.56  | 7 | 1  | 2  | 2  | 1.57 | 1.46 | 1.69 | 1.59 |      |      |      |      | 1484 | 164.1 | 6.98 |      |     |      |      |
| P04040 | Catalase OS=Homo sapiens GN=CAT PE=1 SV=3 -<br>[CATA_HUMAN]                                             | 16.70 | 1 | 8  | 8  | 20 | 0.80 | 0.78 | 0.69 | 0.67 | 0.92 | 0.88 | 0.90 | 0.82 | 527  | 59.7  | 7.39 |      |     |      |      |
| P35221 | Catenin alpha-1 OS=Homo sapiens GN=CTNNA1 PE=1 SV=1 -<br>[CTNA1_HUMAN]                                  | 3.86  | 1 | 2  | 2  | 3  | 0.64 | 0.62 | 0.77 | 0.80 |      |      |      |      | 906  | 100.0 | 6.29 |      |     |      |      |
| P26232 | Catenin alpha-2 OS=Homo sapiens GN=CTNNA2 PE=1 SV=5 -<br>[CTNA2_HUMAN]                                  | 1.89  | 1 | 1  | 1  | 1  | 1.04 | 1.13 | 1.08 | 1.19 |      |      |      |      | 953  | 105.2 | 5.71 |      |     |      |      |
| Q9UI47 | Catenin alpha-3 OS=Homo sapiens GN=CTNNA3 PE=1 SV=2 -<br>[CTNA3_HUMAN]                                  | 2.46  | 1 | 2  | 2  | 2  | 0.95 | 1.00 | 0.96 | 1.02 |      |      |      |      | 895  | 99.7  | 6.16 |      |     |      |      |
| P49913 | Cathelicidin antimicrobial peptide OS=Homo sapiens<br>GN=CAMP PE=1 SV=1 - [CAMP_HUMAN]                  | 30.59 | 1 | 6  | 6  | 31 | 0.91 | 0.97 | 0.90 | 0.97 | 1.31 | 1.03 | 1.36 | 1.26 | 170  | 19.3  | 9.41 |      |     |      |      |

|        |                                                                                                             |       |   |    |    |     |      |      |      |      |      |      |      |      |      |       |       |
|--------|-------------------------------------------------------------------------------------------------------------|-------|---|----|----|-----|------|------|------|------|------|------|------|------|------|-------|-------|
| P07858 | Cathepsin B OS=Homo sapiens GN=CTSB PE=1 SV=3 - [CATB_HUMAN]                                                | 7.96  | 1 | 2  | 2  | 3   | 0.95 | 0.83 | 0.84 | 0.74 | 0.89 | 1.32 | 1.31 | 1.95 | 339  | 37.8  | 6.30  |
| P07339 | Cathepsin D OS=Homo sapiens GN=CTSD PE=1 SV=1 - [CATD_HUMAN]                                                | 23.06 | 1 | 8  | 8  | 22  | 1.25 | 1.20 | 1.21 | 1.20 | 1.19 | 1.31 | 1.04 | 1.14 | 412  | 44.5  | 6.54  |
| Q9UBX1 | Cathepsin F OS=Homo sapiens GN=CTSF PE=1 SV=1 - [CATF_HUMAN]                                                | 9.09  | 1 | 3  | 3  | 10  | 1.16 | 1.11 | 1.13 | 1.09 | 1.01 | 0.85 | 1.02 | 0.85 | 484  | 53.3  | 8.22  |
| P08311 | Cathepsin G OS=Homo sapiens GN=CTSG PE=1 SV=2 - [CATG_HUMAN]                                                | 23.14 | 1 | 4  | 4  | 15  | 1.08 | 1.07 | 1.07 | 1.06 | 0.87 | 0.90 | 0.92 | 0.90 | 255  | 28.8  | 11.19 |
| P07711 | Cathepsin L1 OS=Homo sapiens GN=CTSL1 PE=1 SV=2 - [CATL1_HUMAN]                                             | 4.20  | 1 | 1  | 1  | 1   |      |      |      |      | 1.48 | 0.02 |      |      | 333  | 37.5  | 5.45  |
| O60911 | Cathepsin L2 OS=Homo sapiens GN=CTSL2 PE=1 SV=2 - [CATL2_HUMAN]                                             | 6.89  | 1 | 1  | 1  | 1   | 0.58 | 0.61 | 0.52 | 0.55 |      |      |      |      | 334  | 37.3  | 8.76  |
| P43234 | Cathepsin O OS=Homo sapiens GN=CTSO PE=2 SV=1 - [CATO_HUMAN]                                                | 5.30  | 1 | 1  | 1  | 1   |      |      |      |      | 0.58 | 0.47 | 0.68 | 0.54 | 321  | 35.9  | 7.42  |
| P25774 | Cathepsin S OS=Homo sapiens GN=CTSS PE=1 SV=3 - [CATS_HUMAN]                                                | 6.65  | 1 | 1  | 1  | 1   |      |      |      |      | 0.84 | 0.74 | 0.77 | 0.68 | 331  | 37.5  | 8.34  |
| P56202 | Cathepsin W OS=Homo sapiens GN=CTSW PE=1 SV=2 - [CATW_HUMAN]                                                | 2.39  | 1 | 1  | 1  | 3   |      |      |      |      | 1.29 | 1.45 | 1.26 | 1.41 | 376  | 42.1  | 7.42  |
| Q9UBR2 | Cathepsin Z OS=Homo sapiens GN=CTSZ PE=1 SV=1 - [CATZ_HUMAN]                                                | 5.28  | 1 | 2  | 2  | 5   |      |      |      |      | 1.35 | 1.47 | 1.24 | 1.35 | 303  | 33.8  | 7.11  |
| Q86XQ3 | Cation channel sperm-associated protein 3 OS=Homo sapiens GN=CATSPER3 PE=1 SV=1 - [CTSR3_HUMAN]             | 5.78  | 1 | 1  | 1  | 1   | 0.98 | 0.85 |      |      |      |      |      |      | 398  | 46.4  | 6.30  |
| Q9H7T0 | Cation channel sperm-associated protein subunit beta OS=Homo sapiens GN=CATSPERB PE=1 SV=2 - [CTSRB_HUMAN]  | 1.25  | 1 | 1  | 1  | 1   |      |      |      |      | 0.90 | 0.67 | 0.86 | 0.64 | 1116 | 126.8 | 7.17  |
| Q6ZRH7 | Cation channel sperm-associated protein subunit gamma OS=Homo sapiens GN=CATSPERG PE=2 SV=3 - [CTSRG_HUMAN] | 0.78  | 1 | 1  | 1  | 1   |      |      |      |      | 0.65 | 0.86 | 0.55 | 0.72 | 1159 | 132.9 | 6.37  |
| Q8WUX2 | Cation transport regulator-like protein 2 OS=Homo sapiens GN=CHAC2 PE=2 SV=1 - [CHAC2_HUMAN]                | 3.26  | 1 | 1  | 1  | 1   | 1.49 | 1.05 | 1.59 | 1.14 |      |      |      |      | 184  | 20.9  | 5.43  |
| P11717 | Cation-independent mannose-6-phosphate receptor OS=Homo sapiens GN=IGF2R PE=1 SV=3 - [MPRI_HUMAN]           | 5.14  | 1 | 9  | 9  | 17  | 1.02 | 1.00 | 1.01 | 1.07 |      |      |      |      | 2491 | 274.2 | 5.94  |
| P51636 | Caveolin-2 OS=Homo sapiens GN=CAV2 PE=1 SV=2 - [CAV2_HUMAN]                                                 | 15.43 | 1 | 1  | 1  | 2   |      |      |      |      | 1.00 | 1.18 | 1.06 | 1.26 | 162  | 18.3  | 5.27  |
| P49715 | CCAAT/enhancer-binding protein alpha OS=Homo sapiens GN=CEBPA PE=1 SV=3 - [CEBPA_HUMAN]                     | 5.31  | 1 | 1  | 1  | 1   | 0.90 | 0.85 | 0.93 | 0.89 |      |      |      |      | 358  | 37.5  | 7.68  |
| A5YKK6 | CCR4-NOT transcription complex subunit 1 OS=Homo sapiens GN=CNOT1 PE=1 SV=2 - [CNOT1_HUMAN]                 | 2.23  | 1 | 3  | 3  | 3   | 0.83 | 0.75 | 0.88 | 0.80 | 1.35 | 1.34 | 1.21 | 1.20 | 2376 | 266.8 | 7.11  |
| Q6YHK3 | CD109 antigen OS=Homo sapiens GN=CD109 PE=1 SV=2 - [CD109_HUMAN]                                            | 9.20  | 1 | 9  | 9  | 24  | 1.04 | 1.03 | 1.07 | 1.07 |      |      |      |      | 1445 | 161.6 | 5.85  |
| Q13740 | CD166 antigen OS=Homo sapiens GN=ALCAM PE=1 SV=2 - [CD166_HUMAN]                                            | 8.75  | 1 | 4  | 4  | 11  | 1.27 | 1.21 | 1.23 | 1.25 | 1.25 | 1.11 | 1.35 | 1.20 | 583  | 65.1  | 6.25  |
| Q8N6Q3 | CD177 antigen OS=Homo sapiens GN=CD177 PE=1 SV=2 - [CD177_HUMAN]                                            | 3.89  | 1 | 2  | 2  | 4   | 1.36 | 1.38 | 1.43 | 1.46 | 0.96 | 1.02 | 1.05 | 1.11 | 437  | 46.3  | 6.29  |
| Q9Y5K6 | CD2-associated protein OS=Homo sapiens GN=CD2AP PE=1 SV=1 - [CD2AP_HUMAN]                                   | 3.76  | 1 | 2  | 2  | 3   |      |      |      |      | 1.14 | 1.32 | 1.13 | 1.31 | 639  | 71.4  | 6.40  |
| Q15762 | CD226 antigen OS=Homo sapiens GN=CD226 PE=1 SV=2 - [CD226_HUMAN]                                            | 4.17  | 1 | 1  | 1  | 1   |      |      |      |      | 0.83 | 0.83 | 0.80 | 0.80 | 336  | 38.6  | 7.94  |
| P26842 | CD27 antigen OS=Homo sapiens GN=CD27 PE=1 SV=2 - [CD27_HUMAN]                                               | 5.38  | 1 | 1  | 1  | 1   | 1.30 | 1.50 | 1.22 | 1.42 |      |      |      |      | 260  | 29.1  | 7.64  |
| P29965 | CD40 ligand OS=Homo sapiens GN=CD40LG PE=1 SV=1 - [CD40L_HUMAN]                                             | 9.96  | 1 | 1  | 1  | 2   |      |      |      |      | 0.79 | 0.90 | 0.70 | 0.80 | 261  | 29.3  | 8.31  |
| P16070 | CD44 antigen OS=Homo sapiens GN=CD44 PE=1 SV=3 - [CD44_HUMAN]                                               | 4.58  | 1 | 4  | 4  | 38  | 1.12 | 1.02 | 1.14 | 1.03 | 0.93 | 0.80 | 0.92 | 0.80 | 742  | 81.5  | 5.33  |
| O43866 | CD5 antigen-like OS=Homo sapiens GN=CD5L PE=1 SV=1 - [CD5L_HUMAN]                                           | 68.88 | 1 | 25 | 26 | 661 | 1.08 | 1.06 | 1.12 | 1.09 | 1.15 | 1.18 | 1.15 | 1.10 | 347  | 38.1  | 5.47  |

|        |                                                                                                            |       |   |   |   |    |      |      |      |      |      |      |      |      |      |       |      |
|--------|------------------------------------------------------------------------------------------------------------|-------|---|---|---|----|------|------|------|------|------|------|------|------|------|-------|------|
| P13987 | CD59 glycoprotein OS=Homo sapiens GN=CD59 PE=1 SV=1 - [CD59_HUMAN]                                         | 15.63 | 1 | 2 | 2 | 8  |      |      |      |      | 0.97 | 1.02 | 0.93 | 1.06 | 128  | 14.2  | 6.48 |
| P27701 | CD82 antigen OS=Homo sapiens GN=CD82 PE=1 SV=1 - [CD82_HUMAN]                                              | 5.62  | 1 | 1 | 1 | 1  | 0.89 | 0.83 | 0.93 | 0.87 |      |      |      |      | 267  | 29.6  | 5.24 |
| P48960 | CD97 antigen OS=Homo sapiens GN=CD97 PE=1 SV=4 - [CD97_HUMAN]                                              | 3.59  | 1 | 2 | 2 | 2  | 1.27 | 0.96 | 1.03 | 0.79 |      |      |      |      | 835  | 91.8  | 6.87 |
| Q9H3Q1 | Cdc42 effector protein 4 OS=Homo sapiens GN=CDC42EP4 PE=1 SV=1 - [BORG4_HUMAN]                             | 4.21  | 1 | 1 | 1 | 2  |      |      |      |      | 0.44 | 0.22 | 0.74 | 0.38 | 356  | 38.0  | 5.19 |
| Q15642 | Cdc42-interacting protein 4 OS=Homo sapiens GN=TRIP10 PE=1 SV=3 - [CIP4_HUMAN]                             | 4.16  | 1 | 1 | 1 | 3  |      |      |      |      | 1.07 | 1.12 | 1.06 | 1.10 | 601  | 68.3  | 5.73 |
| Q96SN8 | CDK5 regulatory subunit-associated protein 2 OS=Homo sapiens GN=CDK5RAP2 PE=1 SV=5 - [CK5P2_HUMAN]         | 3.12  | 1 | 4 | 5 | 17 | 1.46 | 1.04 | 1.60 | 1.20 | 0.86 | 0.93 | 0.85 | 0.90 | 1893 | 214.9 | 5.58 |
| Q9BY67 | Cell adhesion molecule 1 OS=Homo sapiens GN=CADM1 PE=1 SV=2 - [CADM1_HUMAN]                                | 9.73  | 1 | 3 | 3 | 9  | 1.18 | 1.07 | 1.10 | 1.08 | 0.67 | 0.56 | 0.76 | 0.63 | 442  | 48.5  | 5.07 |
| Q8N3J6 | Cell adhesion molecule 2 OS=Homo sapiens GN=CADM2 PE=2 SV=1 - [CADM2_HUMAN]                                | 3.45  | 1 | 1 | 1 | 1  |      |      |      |      | 0.93 | 0.78 | 0.97 | 0.82 | 435  | 47.5  | 5.33 |
| O75943 | Cell cycle checkpoint protein RAD17 OS=Homo sapiens GN=RAD17 PE=1 SV=2 - [RAD17_HUMAN]                     | 1.17  | 1 | 1 | 1 | 1  | 0.85 | 0.85 | 0.85 | 0.86 |      |      |      |      | 681  | 77.0  | 7.06 |
| Q9NQS1 | Cell death regulator Aven OS=Homo sapiens GN=AVEN PE=1 SV=1 - [AVEN_HUMAN]                                 | 5.80  | 1 | 1 | 1 | 1  | 0.28 | 0.22 | 0.34 | 0.27 |      |      |      |      | 362  | 38.5  | 4.98 |
| P60953 | Cell division control protein 42 homolog OS=Homo sapiens GN=CDC42 PE=1 SV=2 - [CDC42_HUMAN]                | 27.23 | 4 | 3 | 4 | 9  | 0.75 | 0.77 | 0.76 | 0.78 | 1.07 | 1.01 | 1.02 | 0.96 | 191  | 21.2  | 6.55 |
| Q99741 | Cell division control protein 6 homolog OS=Homo sapiens GN=CDC6 PE=1 SV=1 - [CDC6_HUMAN]                   | 1.96  | 1 | 1 | 1 | 1  | 0.92 | 0.94 | 0.87 | 0.90 |      |      |      |      | 560  | 62.7  | 9.58 |
| Q99459 | Cell division cycle 5-like protein OS=Homo sapiens GN=CDC5L PE=1 SV=2 - [CDC5L_HUMAN]                      | 1.12  | 1 | 1 | 1 | 3  | 0.83 | 0.87 | 0.81 | 0.86 |      |      |      |      | 802  | 92.2  | 8.18 |
| Q8IX12 | Cell division cycle and apoptosis regulator protein 1 OS=Homo sapiens GN=CCAR1 PE=1 SV=2 - [CCAR1_HUMAN]   | 2.52  | 1 | 2 | 2 | 2  | 0.93 | 1.02 | 0.94 | 1.04 |      |      |      |      | 1150 | 132.7 | 5.76 |
| Q12834 | Cell division cycle protein 20 homolog OS=Homo sapiens GN=CDC20 PE=1 SV=2 - [CDC20_HUMAN]                  | 4.61  | 1 | 1 | 1 | 1  |      |      |      |      | 1.17 | 0.81 | 1.10 | 0.76 | 499  | 54.7  | 9.23 |
| P30260 | Cell division cycle protein 27 homolog OS=Homo sapiens GN=CDC27 PE=1 SV=2 - [CDC27_HUMAN]                  | 4.00  | 1 | 2 | 2 | 3  | 0.92 | 1.02 | 0.86 | 0.96 |      |      |      |      | 824  | 91.8  | 7.02 |
| Q96GN5 | Cell division cycle-associated 7-like protein OS=Homo sapiens GN=CDA7L PE=1 SV=2 - [CDA7L_HUMAN]           | 3.74  | 1 | 1 | 1 | 1  | 1.46 | 1.06 | 1.31 | 0.96 |      |      |      |      | 454  | 52.2  | 5.74 |
| Q69YH5 | Cell division cycle-associated protein 2 OS=Homo sapiens GN=CDA2 PE=1 SV=2 - [CDA2_HUMAN]                  | 3.71  | 1 | 2 | 2 | 3  | 0.84 | 0.78 | 0.76 | 0.72 |      |      |      |      | 1023 | 112.6 | 8.40 |
| Q8BXL8 | Cell division cycle-associated protein 4 OS=Homo sapiens GN=CDA4 PE=2 SV=1 - [CDA4_HUMAN]                  | 10.79 | 1 | 2 | 2 | 2  |      |      |      |      | 0.66 | 0.76 | 0.99 | 1.14 | 241  | 26.1  | 4.97 |
| Q99675 | Cell growth regulator with RING finger domain protein 1 OS=Homo sapiens GN=CGRF1 PE=1 SV=1 - [CGRF1_HUMAN] | 3.92  | 1 | 1 | 1 | 1  | 1.03 | 0.81 | 0.88 | 0.69 |      |      |      |      | 332  | 38.2  | 5.16 |
| Q9NX58 | Cell growth-regulating nucleolar protein OS=Homo sapiens GN=LYAR PE=1 SV=2 - [LYAR_HUMAN]                  | 5.28  | 1 | 2 | 2 | 3  | 0.61 | 0.82 | 0.70 | 0.95 | 1.42 | 1.51 | 1.24 | 1.32 | 379  | 43.6  | 9.54 |
| Q8TD46 | Cell surface glycoprotein CD200 receptor 1 OS=Homo sapiens GN=CD200R1 PE=1 SV=2 - [MO2R1_HUMAN]            | 7.38  | 1 | 1 | 1 | 1  |      |      |      |      | 0.83 | 0.79 | 0.76 | 0.72 | 325  | 36.6  | 7.93 |
| P43121 | Cell surface glycoprotein MUC18 OS=Homo sapiens GN=MCAM PE=1 SV=2 - [MUC18_HUMAN]                          | 8.51  | 1 | 5 | 5 | 31 | 0.98 | 0.94 | 1.01 | 0.96 | 0.94 | 1.08 | 1.00 | 1.06 | 646  | 71.6  | 5.76 |
| P04637 | Cellular tumor antigen p53 OS=Homo sapiens GN=TP53 PE=1 SV=4 - [P53_HUMAN]                                 | 3.56  | 1 | 1 | 1 | 1  | 1.30 | 1.24 | 1.21 | 1.17 |      |      |      |      | 393  | 43.6  | 6.79 |
| Q9NXG0 | Centlein OS=Homo sapiens GN=CNTRLN PE=2 SV=5 - [CNTRLN_HUMAN]                                              | 3.35  | 1 | 3 | 3 | 4  | 0.97 | 0.93 | 1.06 | 0.93 |      |      |      |      | 1405 | 161.5 | 8.15 |
| Q7Z7A1 | Centriolin OS=Homo sapiens GN=CNTRL PE=1 SV=2 - [CNTRL_HUMAN]                                              | 3.23  | 1 | 6 | 6 | 12 | 1.10 | 1.12 | 0.99 | 0.96 | 0.76 | 0.72 | 0.63 | 0.59 | 2325 | 268.7 | 5.55 |
| P49454 | Centromere protein F OS=Homo sapiens GN=CENPF PE=1 SV=2 - [CENPF_HUMAN]                                    | 1.21  | 1 | 3 | 4 | 15 | 1.50 | 1.17 | 1.06 | 0.92 |      |      |      |      | 3210 | 367.5 | 5.07 |

|        |                                                                                              |       |    |   |   |    |      |      |      |      |      |      |      |      |      |       |      |
|--------|----------------------------------------------------------------------------------------------|-------|----|---|---|----|------|------|------|------|------|------|------|------|------|-------|------|
| Q9BS16 | Centromere protein K OS=Homo sapiens GN=CENPK PE=1 SV=1 - [CENPK_HUMAN]                      | 8.18  | 1  | 1 | 1 | 1  | 0.98 | 1.20 | 1.11 | 1.38 |      | 269  | 31.6 | 4.89 |      |       |      |
| Q9NSP4 | Centromere protein M OS=Homo sapiens GN=CENPM PE=1 SV=1 - [CENPM_HUMAN]                      | 7.22  | 1  | 1 | 1 | 1  |      |      |      |      | 0.58 | 0.62 | 0.54 | 0.58 | 180  | 19.7  | 7.20 |
| Q96H22 | Centromere protein N OS=Homo sapiens GN=CENPN PE=1 SV=2 - [CENPN_HUMAN]                      | 3.24  | 1  | 1 | 1 | 1  |      |      |      |      | 0.68 | 0.71 | 1.02 | 1.07 | 339  | 39.5  | 9.13 |
| Q7L2Z9 | Centromere protein Q OS=Homo sapiens GN=CENPQ PE=1 SV=1 - [CENPQ_HUMAN]                      | 7.46  | 1  | 2 | 2 | 2  | 1.14 | 1.19 | 1.00 | 1.05 | 1.34 | 1.43 | 1.37 | 1.47 | 268  | 30.6  | 9.42 |
| Q13352 | Centromere protein R OS=Homo sapiens GN=ITGB3BP PE=1 SV=2 - [CENPR_HUMAN]                    | 12.43 | 1  | 1 | 1 | 1  | 0.12 | 0.08 | 0.22 | 0.17 |      |      |      |      | 177  | 20.2  | 9.07 |
| Q96BT3 | Centromere protein T OS=Homo sapiens GN=CENPT PE=1 SV=2 - [CENPT_HUMAN]                      | 3.21  | 1  | 1 | 1 | 1  | 1.04 | 1.08 | 0.96 | 1.01 |      |      |      |      | 561  | 60.4  | 6.58 |
| Q7Z7K6 | Centromere protein V OS=Homo sapiens GN=CENPV PE=1 SV=1 - [CENPV_HUMAN]                      | 4.73  | 1  | 1 | 1 | 1  | 1.34 | 1.09 | 1.18 | 0.97 |      |      |      |      | 275  | 29.9  | 9.73 |
| O43264 | Centromere/kinetochore protein zw10 homolog OS=Homo sapiens GN=ZW10 PE=1 SV=3 - [ZW10_HUMAN] | 3.59  | 2  | 1 | 2 | 2  |      |      |      |      | 1.17 | 1.23 | 1.02 | 1.07 | 779  | 88.8  | 6.27 |
| Q9C0D2 | Centrosomal protein KIAA1731 OS=Homo sapiens GN=KIAA1731 PE=2 SV=4 - [K1731_HUMAN]           | 3.00  | 1  | 2 | 3 | 3  | 0.74 |      | 0.58 |      |      |      |      |      | 2601 | 295.0 | 6.00 |
| Q8N8E3 | Centrosomal protein of 112 kDa OS=Homo sapiens GN=CEP112 PE=1 SV=2 - [CE112_HUMAN]           | 2.93  | 1  | 2 | 2 | 3  | 0.42 | 0.25 | 0.77 | 0.45 | 0.96 | 0.70 | 1.08 | 0.79 | 955  | 112.7 | 6.68 |
| Q66GS9 | Centrosomal protein of 135 kDa OS=Homo sapiens GN=CEP135 PE=1 SV=2 - [CP135_HUMAN]           | 0.96  | 1  | 1 | 1 | 1  |      |      |      |      | 0.97 | 1.68 | 1.14 | 1.97 | 1140 | 133.4 | 6.21 |
| O94986 | Centrosomal protein of 152 kDa OS=Homo sapiens GN=CEP152 PE=1 SV=3 - [CE152_HUMAN]           | 1.21  | 1  | 1 | 1 | 1  |      |      |      |      | 1.00 | 0.86 | 0.85 | 0.72 | 1654 | 189.0 | 5.44 |
| Q9UPV0 | Centrosomal protein of 164 kDa OS=Homo sapiens GN=CEP164 PE=1 SV=3 - [CE164_HUMAN]           | 2.19  | 1  | 2 | 2 | 2  | 0.96 | 0.71 | 1.26 | 0.94 |      |      |      |      | 1460 | 164.2 | 5.36 |
| Q5SW79 | Centrosomal protein of 170 kDa OS=Homo sapiens GN=CEP170 PE=1 SV=1 - [CE170_HUMAN]           | 2.97  | 1  | 2 | 2 | 3  | 0.78 | 0.96 | 0.66 | 0.81 |      |      |      |      | 1584 | 175.2 | 7.11 |
| Q8NHQ1 | Centrosomal protein of 70 kDa OS=Homo sapiens GN=CEP70 PE=1 SV=2 - [CEP70_HUMAN]             | 1.51  | 1  | 1 | 1 | 2  |      |      |      |      | 0.80 | 0.70 | 0.98 | 0.86 | 597  | 69.7  | 5.71 |
| Q6P2H3 | Centrosomal protein of 85 kDa OS=Homo sapiens GN=CEP85 PE=1 SV=1 - [CEP85_HUMAN]             | 6.82  | 1  | 2 | 2 | 4  | 0.94 | 0.92 | 1.06 | 1.04 |      |      |      |      | 762  | 85.6  | 6.00 |
| Q96ST8 | Centrosomal protein of 89 kDa OS=Homo sapiens GN=CEP89 PE=1 SV=3 - [CEP89_HUMAN]             | 1.40  | 1  | 1 | 1 | 2  | 1.16 | 1.17 | 1.13 | 1.14 |      |      |      |      | 783  | 89.5  | 6.80 |
| Q96GE4 | Centrosomal protein of 95 kDa OS=Homo sapiens GN=CEP95 PE=1 SV=1 - [CEP95_HUMAN]             | 2.80  | 1  | 2 | 2 | 2  |      |      |      |      | 1.24 | 1.22 | 1.13 | 1.12 | 821  | 95.2  | 8.59 |
| Q8IW35 | Centrosomal protein of 97 kDa OS=Homo sapiens GN=CEP97 PE=1 SV=1 - [CEP97_HUMAN]             | 2.89  | 1  | 1 | 1 | 1  |      |      |      |      | 0.56 | 0.43 | 1.05 | 0.79 | 865  | 96.9  | 5.02 |
| Q8NA72 | Centrosomal protein POC5 OS=Homo sapiens GN=POC5 PE=1 SV=2 - [POC5_HUMAN]                    | 8.17  | 1  | 2 | 2 | 2  | 0.63 |      | 0.93 |      | 1.13 | 1.16 | 1.27 | 1.30 | 575  | 63.3  | 7.42 |
| Q5VT06 | Centrosome-associated protein 350 OS=Homo sapiens GN=CEP350 PE=1 SV=1 - [CE350_HUMAN]        | 4.04  | 14 | 5 | 8 | 59 | 0.65 | 0.84 | 0.75 | 0.96 | 1.40 | 1.21 | 1.14 | 0.99 | 3117 | 350.7 | 6.33 |
| Q9BV73 | Centrosome-associated protein CEP250 OS=Homo sapiens GN=CEP250 PE=1 SV=2 - [CP250_HUMAN]     | 3.03  | 1  | 6 | 6 | 7  | 0.90 | 0.88 | 1.02 | 1.01 | 3.07 | 1.30 | 1.49 | 0.91 | 2442 | 281.0 | 5.02 |
| Q16739 | Ceramide glucosyltransferase OS=Homo sapiens GN=UGCG PE=1 SV=1 - [CEGT_HUMAN]                | 3.05  | 1  | 1 | 1 | 4  |      |      |      |      | 0.78 | 0.90 | 0.86 | 0.99 | 394  | 44.8  | 7.78 |
| Q49MI3 | Ceramide kinase-like protein OS=Homo sapiens GN=CERKL PE=1 SV=1 - [CERKL_HUMAN]              | 1.61  | 1  | 1 | 1 | 2  | 0.78 | 0.93 | 0.89 | 1.08 |      |      |      |      | 558  | 62.6  | 8.27 |
| Q9HA82 | Ceramide synthase 4 OS=Homo sapiens GN=CERS4 PE=1 SV=2 - [CERS4_HUMAN]                       | 3.30  | 1  | 1 | 1 | 1  |      |      |      |      | 2.53 | 2.74 | 2.34 | 2.53 | 394  | 46.4  | 9.07 |
| Q8IU8  | Cerebellin-2 OS=Homo sapiens GN=CBLN2 PE=2 SV=1 - [CBLN2_HUMAN]                              | 5.80  | 1  | 1 | 1 | 1  | 1.11 | 1.35 | 1.01 | 1.23 |      |      |      |      | 224  | 24.1  | 8.48 |
| Q9NTU7 | Cerebellin-4 OS=Homo sapiens GN=CBLN4 PE=1 SV=1 - [CBLN4_HUMAN]                              | 16.42 | 1  | 3 | 3 | 7  | 0.93 | 0.91 | 0.87 | 0.90 |      |      |      |      | 201  | 21.8  | 8.73 |

|        |                                                                                                                 |       |   |    |    |      |      |      |      |      |      |      |      |      |      |       |       |
|--------|-----------------------------------------------------------------------------------------------------------------|-------|---|----|----|------|------|------|------|------|------|------|------|------|------|-------|-------|
| P00450 | Ceruloplasmin OS=Homo sapiens GN=CP PE=1 SV=1 - [CERU_HUMAN]                                                    | 60.56 | 1 | 63 | 63 | 3655 | 1.12 | 1.16 | 1.12 | 1.17 | 1.20 | 1.21 | 1.11 | 1.18 | 1065 | 122.1 | 5.72  |
| P29973 | cGMP-gated cation channel alpha-1 OS=Homo sapiens GN=CNGA1 PE=1 SV=3 - [CNGA1_HUMAN]                            | 8.70  | 1 | 2  | 2  | 10   | 1.64 | 1.73 | 1.77 | 1.82 |      |      |      |      | 690  | 79.5  | 7.81  |
| Q14432 | cGMP-inhibited 3',5'-cyclic phosphodiesterase A OS=Homo sapiens GN=PDE3A PE=1 SV=3 - [PDE3A_HUMAN]              | 0.96  | 1 | 1  | 1  | 3    |      |      |      |      | 2.75 | 2.65 | 2.36 | 2.28 | 1141 | 124.9 | 6.00  |
| O76074 | cGMP-specific 3',5'-cyclic phosphodiesterase OS=Homo sapiens GN=PDE5A PE=1 SV=2 - [PDE5A_HUMAN]                 | 1.71  | 4 | 1  | 2  | 10   |      |      |      |      | 1.42 | 1.51 | 1.41 | 1.49 | 875  | 99.9  | 6.09  |
| Q7LBR1 | Charged multivesicular body protein 1b OS=Homo sapiens GN=CHMP1B PE=1 SV=1 - [CHM1B_HUMAN]                      | 2.51  | 1 | 1  | 1  | 1    |      |      |      |      | 0.86 | 0.66 | 0.91 | 0.69 | 199  | 22.1  | 8.10  |
| Q8WUX9 | Charged multivesicular body protein 7 OS=Homo sapiens GN=CHMP7 PE=1 SV=1 - [CHMP7_HUMAN]                        | 1.99  | 1 | 1  | 1  | 1    |      |      |      |      | 1.19 | 1.35 | 1.24 | 1.41 | 453  | 50.9  | 5.35  |
| P36222 | Chitinase-3-like protein 1 OS=Homo sapiens GN=CHI3L1 PE=1 SV=2 - [CHI3L1_HUMAN]                                 | 1.83  | 1 | 1  | 1  | 1    |      |      |      |      | 1.00 | 0.82 | 0.94 | 0.77 | 383  | 42.6  | 8.46  |
| Q15782 | Chitinase-3-like protein 2 OS=Homo sapiens GN=CHI3L2 PE=1 SV=1 - [CHI3L2_HUMAN]                                 | 6.15  | 1 | 2  | 2  | 2    | 1.82 | 1.93 | 1.80 | 1.91 | 0.58 | 0.47 | 0.76 | 0.61 | 390  | 43.5  | 7.53  |
| Q13231 | Chitotriosidase-1 OS=Homo sapiens GN=CHIT1 PE=1 SV=1 - [CHIT1_HUMAN]                                            | 6.87  | 1 | 2  | 2  | 6    | 1.27 | 1.27 | 1.26 | 1.27 | 0.81 | 1.33 | 466  | 51.6 | 6.96 |       |       |
| O00299 | Chloride intracellular channel protein 1 OS=Homo sapiens GN=CLIC1 PE=1 SV=4 - [CLIC1_HUMAN]                     | 32.37 | 1 | 7  | 7  | 24   | 0.84 | 0.85 | 0.79 | 0.81 | 0.87 | 0.90 | 0.89 | 0.88 | 241  | 26.9  | 5.17  |
| Q96NY7 | Chloride intracellular channel protein 6 OS=Homo sapiens GN=CLIC6 PE=2 SV=3 - [CLIC6_HUMAN]                     | 9.23  | 1 | 2  | 2  | 2    | 0.77 | 1.57 | 0.77 | 1.12 |      |      |      |      | 704  | 73.0  | 4.37  |
| P51797 | Chloride transport protein 6 OS=Homo sapiens GN=CLCN6 PE=1 SV=2 - [CLCN6_HUMAN]                                 | 1.15  | 1 | 1  | 1  | 1    | 1.17 | 1.11 | 1.16 | 1.11 |      |      |      |      | 869  | 97.2  | 6.81  |
| P32238 | Cholecystokinin receptor type A OS=Homo sapiens GN=CCKAR PE=1 SV=1 - [CCKAR_HUMAN]                              | 7.94  | 1 | 1  | 1  | 1    |      |      |      |      | 0.50 | 0.51 | 0.46 | 0.47 | 428  | 47.8  | 9.20  |
| P11597 | Cholesteryl ester transfer protein OS=Homo sapiens GN=CETP PE=1 SV=2 - [CETP_HUMAN]                             | 23.73 | 1 | 11 | 11 | 73   | 1.10 | 1.22 | 1.06 | 1.20 | 1.08 | 0.87 | 1.00 | 0.87 | 493  | 54.7  | 6.09  |
| P28329 | Choline O-acetyltransferase OS=Homo sapiens GN=CHAT PE=1 SV=4 - [CHAT_HUMAN]                                    | 2.01  | 9 | 1  | 2  | 4    |      |      |      |      | 0.81 | 0.71 | 0.77 | 0.68 | 748  | 82.5  | 8.59  |
| P06276 | Cholinesterase OS=Homo sapiens GN=BCHPE PE=1 SV=1 - [CHLE_HUMAN]                                                | 27.57 | 1 | 14 | 16 | 75   | 1.11 | 1.13 | 1.11 | 1.14 | 1.26 | 1.33 | 1.19 | 1.24 | 602  | 68.4  | 7.42  |
| O15335 | Chondroadherin OS=Homo sapiens GN=CHAD PE=2 SV=2 - [CHAD_HUMAN]                                                 | 3.62  | 1 | 1  | 1  | 1    |      |      |      |      | 1.29 | 1.35 | 1.23 | 1.28 | 359  | 40.5  | 9.39  |
| Q8TDX6 | Chondroitin sulfate N-acetylgalactosaminyltransferase 1 OS=Homo sapiens GN=CSGALNACT1 PE=1 SV=2 - [CGAT1_HUMAN] | 1.13  | 1 | 1  | 1  | 1    |      |      |      |      | 4.83 | 5.07 | 4.12 | 4.31 | 532  | 61.3  | 8.41  |
| Q6UVK1 | Chondroitin sulfate proteoglycan 4 OS=Homo sapiens GN=CSPG4 PE=1 SV=2 - [CSPG4_HUMAN]                           | 3.45  | 1 | 5  | 5  | 9    | 0.91 | 0.95 | 0.88 | 0.88 | 0.71 | 0.61 | 0.73 | 0.63 | 2322 | 250.4 | 5.47  |
| O95196 | Chondroitin sulfate proteoglycan 5 OS=Homo sapiens GN=CSPG5 PE=1 SV=3 - [CSPG5_HUMAN]                           | 5.30  | 1 | 2  | 2  | 2    | 1.63 | 1.70 | 1.83 | 1.91 | 0.74 | 0.56 | 0.77 | 0.59 | 566  | 60.0  | 4.50  |
| Q9H9P2 | Chondrolectin OS=Homo sapiens GN=CHODL PE=2 SV=2 - [CHODL_HUMAN]                                                | 2.56  | 1 | 1  | 1  | 1    |      |      |      |      | 1.21 | 0.93 | 1.26 | 0.96 | 273  | 30.4  | 6.83  |
| Q9Y5P2 | Chondrosarcoma-associated gene 2/3 protein OS=Homo sapiens GN=CSAG2 PE=2 SV=2 - [CSAG2_HUMAN]                   | 17.32 | 2 | 2  | 2  | 23   | 0.95 | 1.03 | 1.02 | 0.84 | 1.20 | 1.45 | 1.12 | 1.27 | 127  | 14.4  | 10.32 |
| Q9BU40 | Chordin-like protein 1 OS=Homo sapiens GN=CHRD1 PE=2 SV=1 - [CRDL1_HUMAN]                                       | 2.22  | 1 | 1  | 1  | 2    | 0.94 | 1.09 | 1.12 | 1.30 |      |      |      |      | 450  | 51.1  | 8.13  |
| Q9NP62 | Chorion-specific transcription factor GCMa OS=Homo sapiens GN=GCM1 PE=2 SV=1 - [GCM1_HUMAN]                     | 2.52  | 1 | 1  | 1  | 4    | 0.91 | 1.03 | 1.07 | 1.22 | 1.23 | 1.03 | 1.26 | 1.05 | 436  | 49.2  | 7.02  |
| P01243 | Chorionic somatomammotropin hormone OS=Homo sapiens GN=CSH1 PE=1 SV=2 - [CSH_HUMAN]                             | 23.96 | 2 | 2  | 5  | 31   |      |      |      |      | 2.16 | 3.44 | 2.33 | 3.61 | 217  | 25.0  | 5.59  |
| Q13111 | Chromatin assembly factor 1 subunit A OS=Homo sapiens GN=CHAF1A PE=1 SV=2 - [CAF1A_HUMAN]                       | 5.02  | 1 | 2  | 2  | 3    | 1.49 | 1.76 | 1.47 | 1.74 |      |      |      |      | 956  | 106.9 | 5.94  |
| Q14781 | Chromobox protein homolog 2 OS=Homo sapiens GN=CBX2 PE=1 SV=2 - [CBX2_HUMAN]                                    | 4.32  | 1 | 1  | 1  | 1    |      |      |      |      | 0.87 | 0.77 | 0.98 | 0.87 | 532  | 56.0  | 10.01 |

|        |                                                                                                                             |       |   |    |    |      |      |      |      |      |      |      |       |      |      |       |      |
|--------|-----------------------------------------------------------------------------------------------------------------------------|-------|---|----|----|------|------|------|------|------|------|------|-------|------|------|-------|------|
| O14646 | Chromodomain-helicase-DNA-binding protein 1 OS=Homo sapiens GN=CHD1 PE=1 SV=2 - [CHD1_HUMAN]                                | 1.46  | 1 | 1  | 2  | 7    |      | 0.49 | 0.65 | 1.14 | 1.30 | 1710 | 196.6 | 7.14 |      |       |      |
| Q86WJ1 | Chromodomain-helicase-DNA-binding protein 1-like OS=Homo sapiens GN=CHD1L PE=1 SV=2 - [CHD1L_HUMAN]                         | 1.23  | 1 | 1  | 1  | 3    | 2.24 | 2.28 | 2.59 | 2.64 |      | 897  | 100.9 | 6.90 |      |       |      |
| O14647 | Chromodomain-helicase-DNA-binding protein 2 OS=Homo sapiens GN=CHD2 PE=1 SV=2 - [CHD2_HUMAN]                                | 2.30  | 1 | 2  | 3  | 7    | 1.38 | 1.30 | 1.35 | 1.29 | 1.30 | 1.32 | 1.11  | 1.13 | 1828 | 211.2 | 8.10 |
| Q8TD26 | Chromodomain-helicase-DNA-binding protein 6 OS=Homo sapiens GN=CHD6 PE=1 SV=4 - [CHD6_HUMAN]                                | 2.80  | 9 | 3  | 4  | 5    | 1.16 | 1.04 | 0.93 | 0.87 | 1.11 | 1.01 | 0.78  | 0.71 | 2715 | 305.2 | 6.27 |
| Q9P2D1 | Chromodomain-helicase-DNA-binding protein 7 OS=Homo sapiens GN=CHD7 PE=1 SV=3 - [CHD7_HUMAN]                                | 0.57  | 9 | 1  | 2  | 3    | 1.72 | 1.74 | 1.60 | 1.63 | 0.34 | 0.40 | 0.43  | 0.51 | 2997 | 335.7 | 6.34 |
| Q9HCK8 | Chromodomain-helicase-DNA-binding protein 8 OS=Homo sapiens GN=CHD8 PE=1 SV=5 - [CHD8_HUMAN]                                | 0.74  | 9 | 1  | 2  | 7    |      |      |      |      | 1.35 | 1.54 | 1.10  | 1.27 | 2581 | 290.3 | 6.47 |
| Q3L8U1 | Chromodomain-helicase-DNA-binding protein 9 OS=Homo sapiens GN=CHD9 PE=1 SV=2 - [CHD9_HUMAN]                                | 0.90  | 9 | 1  | 2  | 3    | 1.05 | 0.83 | 0.80 | 0.64 | 1.08 | 1.20 | 1.20  | 1.33 | 2897 | 325.8 | 7.01 |
| P10645 | Chromogranin-A OS=Homo sapiens GN=CHGA PE=1 SV=7 - [CMGA_HUMAN]                                                             | 4.16  | 1 | 1  | 1  | 6    |      |      |      |      | 2.05 | 2.07 | 1.96  | 1.97 | 457  | 50.7  | 4.60 |
| Q8WVB6 | Chromosome transmission fidelity protein 18 homolog OS=Homo sapiens GN=CTTF18 PE=1 SV=1 - [CTF18_HUMAN]                     | 1.74  | 1 | 1  | 1  | 1    |      |      |      |      | 0.87 | 0.90 | 1.07  | 1.11 | 975  | 107.3 | 7.21 |
| O95239 | Chromosome-associated kinesin KIF4A OS=Homo sapiens GN=KIF4A PE=1 SV=3 - [KIF4A_HUMAN]                                      | 1.95  | 1 | 1  | 2  | 3    |      |      |      |      | 0.73 | 0.82 | 0.63  | 0.71 | 1232 | 139.8 | 6.27 |
| P08861 | Chymotrypsin-like elastase family member 3B OS=Homo sapiens GN=CELA3B PE=1 SV=3 - [CEL3B_HUMAN]                             | 8.15  | 1 | 1  | 1  | 1    |      |      |      |      | 0.87 | 1.02 | 1.08  | 1.27 | 270  | 29.2  | 6.28 |
| P40313 | Chymotrypsin-like protease CTRL-1 OS=Homo sapiens GN=CTRL PE=2 SV=1 - [CTRL_HUMAN]                                          | 7.58  | 1 | 1  | 1  | 1    | 1.85 | 1.89 | 1.17 | 1.20 |      |      |       |      | 264  | 28.0  | 8.19 |
| Q9P2M7 | Cingulin OS=Homo sapiens GN=CGN PE=1 SV=2 - [CING_HUMAN]                                                                    | 2.09  | 2 | 2  | 3  | 13   | 0.74 | 0.53 | 0.73 | 0.53 | 0.91 | 1.00 | 0.97  | 0.90 | 1197 | 136.3 | 5.54 |
| O14578 | Citron Rho-interacting kinase OS=Homo sapiens GN=CIT PE=1 SV=2 - [CTRO_HUMAN]                                               | 1.43  | 1 | 2  | 3  | 9    | 1.73 | 2.27 | 1.25 | 1.64 | 0.92 | 0.81 | 1.03  | 0.90 | 2027 | 231.3 | 6.57 |
| Q8IZ96 | CKLF-like MARVEL transmembrane domain-containing protein 1 OS=Homo sapiens GN=CMTM1 PE=2 SV=1 - [CKLF1_HUMAN]               | 17.16 | 1 | 1  | 1  | 1    | 1.35 | 1.03 | 1.57 | 1.20 |      |      |       |      | 169  | 18.6  | 6.99 |
| O14503 | Class E basic helix-loop-helix protein 40 OS=Homo sapiens GN=BHLHE40 PE=1 SV=1 - [BHE40_HUMAN]                              | 3.88  | 1 | 1  | 1  | 1    | 0.67 | 0.63 | 0.68 | 0.64 |      |      |       |      | 412  | 45.5  | 8.10 |
| O60641 | Clathrin coat assembly protein AP180 OS=Homo sapiens GN=SNAP91 PE=1 SV=2 - [AP180_HUMAN]                                    | 2.87  | 1 | 2  | 2  | 2    |      |      |      |      | 1.17 | 1.44 | 0.99  | 1.21 | 907  | 92.4  | 4.86 |
| P53675 | Clathrin heavy chain 2 OS=Homo sapiens GN=CLTCL1 PE=1 SV=2 - [CLH2_HUMAN]                                                   | 0.85  | 2 | 1  | 1  | 1    | 0.40 | 0.38 | 0.40 | 0.38 |      |      |       |      | 1640 | 186.9 | 5.85 |
| P78369 | Claudin-10 OS=Homo sapiens GN=CLDN10 PE=1 SV=2 - [CLD10_HUMAN]                                                              | 6.14  | 1 | 2  | 2  | 2    |      |      |      |      | 1.08 | 0.81 | 0.91  | 0.68 | 228  | 24.5  | 8.03 |
| P56749 | Claudin-12 OS=Homo sapiens GN=CLDN12 PE=1 SV=1 - [CLD12_HUMAN]                                                              | 6.15  | 1 | 1  | 1  | 1    |      |      |      |      | 0.98 | 1.18 | 2.77  | 3.31 | 244  | 27.1  | 8.46 |
| Q9UKF6 | Cleavage and polyadenylation specificity factor subunit 3 OS=Homo sapiens GN=CPSF3 PE=1 SV=1 - [CPSF3_HUMAN]                | 2.49  | 1 | 1  | 1  | 1    | 0.72 | 0.78 | 0.98 | 1.07 |      |      |       |      | 684  | 77.4  | 5.60 |
| O96005 | Cleft lip and palate transmembrane protein 1 OS=Homo sapiens GN=CLPTM1 PE=1 SV=1 - [CLPT1_HUMAN]                            | 5.83  | 1 | 2  | 2  | 2    | 1.22 | 1.31 | 1.13 | 1.22 |      |      |       |      | 669  | 76.0  | 6.30 |
| Q7Z460 | CLIP-associating protein 1 OS=Homo sapiens GN=CLASP1 PE=1 SV=1 - [CLAP1_HUMAN]                                              | 2.54  | 1 | 2  | 2  | 4    | 1.88 | 1.38 | 1.61 | 1.20 |      |      |       |      | 1538 | 169.3 | 9.03 |
| O75122 | CLIP-associating protein 2 OS=Homo sapiens GN=CLASP2 PE=1 SV=2 - [CLAP2_HUMAN]                                              | 0.93  | 2 | 2  | 2  | 6    | 1.17 | 1.17 | 1.20 | 1.21 |      |      |       |      | 1294 | 141.0 | 8.47 |
| P10909 | Clusterin OS=Homo sapiens GN=CLU PE=1 SV=1 - [CLUS_HUMAN]                                                                   | 46.77 | 1 | 23 | 23 | 1479 | 1.03 | 1.01 | 1.01 | 0.98 | 0.81 | 0.81 | 0.81  | 0.83 | 449  | 52.5  | 6.27 |
| Q96AJ1 | Clusterin-associated protein 1 OS=Homo sapiens GN=CLUAP1 PE=1 SV=4 - [CLUA1_HUMAN]                                          | 2.91  | 1 | 1  | 1  | 1    |      |      |      |      | 0.63 | 0.90 | 0.51  | 0.73 | 413  | 48.1  | 4.77 |
| Q11201 | CMP-N-acetylneuramate-beta-galactosamide-alpha-2,3-sialyltransferase 1 OS=Homo sapiens GN=ST3GAL1 PE=2 SV=1 - [SIA4A_HUMAN] | 4.41  | 1 | 1  | 1  | 1    | 0.71 | 0.76 | 1.06 | 1.14 |      |      |       |      | 340  | 39.1  | 9.09 |

|        |                                                                                                               |       |   |    |    |     |      |      |      |      |      |      |      |      |      |       |       |      |      |      |      |     |      |      |
|--------|---------------------------------------------------------------------------------------------------------------|-------|---|----|----|-----|------|------|------|------|------|------|------|------|------|-------|-------|------|------|------|------|-----|------|------|
| P78382 | CMP-sialic acid transporter OS=Homo sapiens GN=SLC35A1 PE=2 SV=1 - [S35A1_HUMAN]                              | 1.78  | 1 | 1  | 1  | 1   |      |      |      |      |      |      |      |      |      |       |       | 1.68 | 2.37 | 1.16 | 1.63 | 337 | 36.8 | 8.95 |
| Q14019 | Coactosin-like protein OS=Homo sapiens GN=COTL1 PE=1 SV=3 - [COTL1_HUMAN]                                     | 38.03 | 1 | 7  | 7  | 31  | 0.97 | 1.10 | 0.95 | 1.10 | 1.56 | 1.48 | 1.31 | 1.33 | 142  | 15.9  | 5.67  |      |      |      |      |     |      |      |
| P00740 | Coagulation factor IX OS=Homo sapiens GN=F9 PE=1 SV=2 - [FA9_HUMAN]                                           | 37.96 | 1 | 14 | 15 | 101 | 1.15 | 1.23 | 1.14 | 1.28 | 0.84 | 0.80 | 0.87 | 0.85 | 461  | 51.7  | 5.47  |      |      |      |      |     |      |      |
| P12259 | Coagulation factor V OS=Homo sapiens GN=F5 PE=1 SV=4 - [FA5_HUMAN]                                            | 21.58 | 1 | 42 | 42 | 307 | 1.04 | 1.04 | 1.05 | 1.08 | 1.08 | 1.13 | 1.08 | 1.14 | 2224 | 251.5 | 6.05  |      |      |      |      |     |      |      |
| P08709 | Coagulation factor VII OS=Homo sapiens GN=F7 PE=1 SV=1 - [FA7_HUMAN]                                          | 25.11 | 1 | 8  | 8  | 77  | 1.11 | 1.20 | 1.02 | 1.11 | 0.89 | 0.87 | 0.94 | 0.91 | 466  | 51.6  | 7.23  |      |      |      |      |     |      |      |
| P00451 | Coagulation factor VIII OS=Homo sapiens GN=F8 PE=1 SV=1 - [FA8_HUMAN]                                         | 3.15  | 1 | 5  | 5  | 7   | 0.94 | 0.87 | 0.98 | 0.91 | 0.73 | 0.64 | 1.00 | 0.88 | 2351 | 266.8 | 7.36  |      |      |      |      |     |      |      |
| P00742 | Coagulation factor X OS=Homo sapiens GN=F10 PE=1 SV=2 - [FA10_HUMAN]                                          | 37.70 | 1 | 18 | 18 | 133 | 1.17 | 1.20 | 1.09 | 1.16 | 0.87 | 0.86 | 0.86 | 0.91 | 488  | 54.7  | 5.94  |      |      |      |      |     |      |      |
| P03951 | Coagulation factor XI OS=Homo sapiens GN=F11 PE=1 SV=1 [FA11_HUMAN]                                           | 43.04 | 2 | 23 | 23 | 99  | 1.03 | 1.02 | 1.09 | 1.09 | 1.07 | 1.06 | 1.05 | 0.97 | 625  | 70.1  | 8.10  |      |      |      |      |     |      |      |
| P00748 | Coagulation factor XII OS=Homo sapiens GN=F12 PE=1 SV=3 - [FA12_HUMAN]                                        | 40.33 | 1 | 26 | 26 | 451 | 1.32 | 1.27 | 1.33 | 1.32 | 1.05 | 0.98 | 1.08 | 1.02 | 615  | 67.7  | 7.74  |      |      |      |      |     |      |      |
| P00488 | Coagulation factor XIII A chain OS=Homo sapiens GN=F13A1 PE=1 SV=4 - [F13A_HUMAN]                             | 33.88 | 2 | 19 | 19 | 70  | 0.74 | 0.72 | 0.79 | 0.78 | 3.06 | 1.77 | 2.76 | 1.56 | 732  | 83.2  | 6.09  |      |      |      |      |     |      |      |
| P05160 | Coagulation factor XIII B chain OS=Homo sapiens GN=F13B PE=1 SV=3 - [F13B_HUMAN]                              | 43.72 | 1 | 24 | 24 | 187 | 1.17 | 1.13 | 1.16 | 1.13 | 0.91 | 0.92 | 0.92 | 0.94 | 661  | 75.5  | 6.39  |      |      |      |      |     |      |      |
| P53621 | Coatamer subunit alpha OS=Homo sapiens GN=COPA PE=1 SV=2 - [COPA_HUMAN]                                       | 2.04  | 2 | 1  | 3  | 5   |      |      |      |      | 1.06 | 0.84 | 1.01 | 0.80 | 1224 | 138.3 | 7.66  |      |      |      |      |     |      |      |
| P53618 | Coatamer subunit beta OS=Homo sapiens GN=COPB1 PE=1 SV=3 - [COPB_HUMAN]                                       | 3.46  | 7 | 2  | 3  | 7   | 0.85 | 0.79 | 0.84 | 0.79 | 0.77 | 0.97 | 0.95 | 1.20 | 953  | 107.1 | 6.05  |      |      |      |      |     |      |      |
| P35606 | Coatamer subunit beta' OS=Homo sapiens GN=COPB2 PE=1 SV=2 - [COPB2_HUMAN]                                     | 4.75  | 1 | 2  | 2  | 2   | 1.05 | 1.44 | 1.03 | 1.41 | 1.11 | 1.03 | 0.81 | 0.74 | 906  | 102.4 | 5.27  |      |      |      |      |     |      |      |
| P48444 | Coatamer subunit delta OS=Homo sapiens GN=ARCN1 PE=1 SV=1 - [COPD_HUMAN]                                      | 7.05  | 1 | 3  | 3  | 8   |      |      |      |      | 1.17 | 1.13 | 1.21 | 1.17 | 511  | 57.2  | 6.21  |      |      |      |      |     |      |      |
| Q9P299 | Coatamer subunit zeta-2 OS=Homo sapiens GN=COPZ2 PE=2 SV=1 - [COPZ2_HUMAN]                                    | 9.05  | 1 | 1  | 1  | 1   | 0.75 | 0.65 | 0.76 | 0.66 |      |      |      |      | 210  | 23.5  | 5.17  |      |      |      |      |     |      |      |
| Q8IWY9 | Codanin-1 OS=Homo sapiens GN=CDAN1 PE=1 SV=4 - [CDAN1_HUMAN]                                                  | 4.24  | 1 | 2  | 2  | 2   |      |      |      |      | 0.29 | 0.79 | 0.95 | 0.82 | 0.99 | 1227  | 134.0 | 6.77 |      |      |      |     |      |      |
| Q96MF6 | Coenzyme Q-binding protein COQ10 homolog A, mitochondrial OS=Homo sapiens GN=COQ10A PE=2 SV=2 - [CQ10A_HUMAN] | 4.05  | 1 | 1  | 1  | 1   |      |      |      |      | 1.92 | 1.63 | 1.65 | 1.40 | 247  | 27.7  | 9.76  |      |      |      |      |     |      |      |
| P23528 | Cofilin-1 OS=Homo sapiens GN=CFL1 PE=1 SV=3 - [COF1_HUMAN]                                                    | 55.42 | 2 | 9  | 10 | 33  | 0.75 | 0.76 | 0.77 | 0.75 | 0.72 | 0.75 | 0.71 | 0.70 | 166  | 18.5  | 8.09  |      |      |      |      |     |      |      |
| Q8WVM7 | Cohesin subunit SA-1 OS=Homo sapiens GN=STAG1 PE=1 SV=3 - [STAG1_HUMAN]                                       | 1.11  | 1 | 2  | 2  | 2   | 1.34 | 1.01 | 1.16 | 0.88 |      |      |      |      | 1258 | 144.3 | 5.59  |      |      |      |      |     |      |      |
| Q9UJ98 | Cohesin subunit SA-3 OS=Homo sapiens GN=STAG3 PE=1 SV=2 - [STAG3_HUMAN]                                       | 2.04  | 1 | 1  | 1  | 2   |      |      |      |      | 1.45 | 1.15 | 1.60 | 1.27 | 1225 | 138.9 | 5.39  |      |      |      |      |     |      |      |
| Q8TD31 | Coiled-coil alpha-helical rod protein 1 OS=Homo sapiens GN=CCHCR1 PE=1 SV=2 - [CCHCR_HUMAN]                   | 1.41  | 1 | 1  | 1  | 1   | 2.59 | 2.35 | 1.13 | 1.02 |      |      |      |      | 782  | 88.6  | 5.95  |      |      |      |      |     |      |      |
| Q6P1N0 | Coiled-coil and C2 domain-containing protein 1A OS=Homo sapiens GN=CC2D1A PE=1 SV=1 - [C2D1A_HUMAN]           | 3.05  | 1 | 2  | 2  | 2   | 0.89 | 0.90 | 0.96 | 0.97 | 0.76 | 0.77 | 0.78 | 0.78 | 951  | 104.0 | 8.09  |      |      |      |      |     |      |      |
| Q9P2K1 | Coiled-coil and C2 domain-containing protein 2A OS=Homo sapiens GN=CC2D2A PE=1 SV=3 - [C2D2A_HUMAN]           | 0.74  | 1 | 1  | 1  | 2   |      |      |      |      | 1.38 | 1.08 | 1.40 | 1.09 | 1620 | 186.1 | 6.74  |      |      |      |      |     |      |      |
| Q8IYK2 | Coiled-coil domain-containing protein 105 OS=Homo sapiens GN=CCDC105 PE=2 SV=3 - [CC105_HUMAN]                | 1.80  | 1 | 1  | 1  | 1   |      |      |      |      | 1.09 | 1.16 | 1.08 | 1.15 | 499  | 56.9  | 9.86  |      |      |      |      |     |      |      |
| Q6ZU64 | Coiled-coil domain-containing protein 108 OS=Homo sapiens GN=CCDC108 PE=2 SV=2 - [CC108_HUMAN]                | 0.62  | 1 | 1  | 1  | 1   |      |      |      |      | 0.71 | 0.78 | 0.93 | 1.02 | 1925 | 217.1 | 6.51  |      |      |      |      |     |      |      |
| Q96M91 | Coiled-coil domain-containing protein 11 OS=Homo sapiens GN=CCDC11 PE=2 SV=2 - [CCD11_HUMAN]                  | 1.56  | 1 | 1  | 1  | 1   |      |      |      |      | 0.75 | 1.23 | 0.58 | 0.95 | 514  | 61.8  | 8.90  |      |      |      |      |     |      |      |



|        |                                                                                                    |       |   |   |   |    |      |      |      |      |      |      |      |      |      |       |      |
|--------|----------------------------------------------------------------------------------------------------|-------|---|---|---|----|------|------|------|------|------|------|------|------|------|-------|------|
| Q8TBZ0 | Coiled-coil domain-containing protein 110 OS=Homo sapiens<br>GN=CCDC110 PE=2 SV=1 - [CC110_HUMAN]  | 3.36  | 1 | 3 | 3 | 10 | 0.97 | 0.90 | 0.99 | 0.94 |      | 833  | 96.7 | 6.24 |      |       |      |
| Q8NEF3 | Coiled-coil domain-containing protein 112 OS=Homo sapiens<br>GN=CCDC112 PE=2 SV=2 - [CC112_HUMAN]  | 2.91  | 1 | 2 | 2 | 3  | 1.36 |      | 1.79 | 0.32 | 0.30 | 0.88 | 0.84 | 446  | 53.5 | 9.48  |      |
| Q96NT0 | Coiled-coil domain-containing protein 115 OS=Homo sapiens<br>GN=CCDC115 PE=1 SV=1 - [CC115_HUMAN]  | 3.89  | 1 | 1 | 1 | 7  | 0.60 | 0.32 | 0.71 | 0.38 | 0.73 | 0.48 | 0.82 | 0.63 | 180  | 19.7  | 6.95 |
| Q5T0U0 | Coiled-coil domain-containing protein 122 OS=Homo sapiens<br>GN=CCDC122 PE=1 SV=1 - [CC122_HUMAN]  | 4.76  | 1 | 1 | 1 | 1  |      |      |      |      | 0.71 | 0.77 | 0.82 | 0.89 | 273  | 32.2  | 7.01 |
| Q86Z20 | Coiled-coil domain-containing protein 125 OS=Homo sapiens<br>GN=CCDC125 PE=2 SV=2 - [CC125_HUMAN]  | 1.96  | 1 | 1 | 1 | 1  |      |      |      |      | 0.64 | 0.42 | 0.73 | 0.47 | 511  | 58.6  | 7.24 |
| Q6ZRS4 | Coiled-coil domain-containing protein 129 OS=Homo sapiens<br>GN=CCDC129 PE=2 SV=2 - [CC129_HUMAN]  | 0.57  | 1 | 1 | 1 | 1  | 1.02 | 1.12 | 1.02 | 1.13 |      |      |      |      | 1044 | 115.3 | 5.31 |
| Q8IYE1 | Coiled-coil domain-containing protein 13 OS=Homo sapiens<br>GN=CCDC13 PE=2 SV=2 - [CCD13_HUMAN]    | 3.08  | 1 | 2 | 2 | 2  |      |      |      |      | 1.20 | 1.23 | 1.18 | 1.21 | 715  | 80.8  | 8.84 |
| Q96JN2 | Coiled-coil domain-containing protein 136 OS=Homo sapiens<br>GN=CCDC136 PE=2 SV=3 - [CC136_HUMAN]  | 1.13  | 1 | 1 | 1 | 1  |      |      |      |      | 0.90 | 1.00 | 0.95 | 1.06 | 1154 | 134.0 | 4.65 |
| Q96M89 | Coiled-coil domain-containing protein 138 OS=Homo sapiens<br>GN=CCDC138 PE=1 SV=1 - [CC138_HUMAN]  | 2.71  | 1 | 1 | 1 | 3  | 0.68 | 0.84 | 0.92 | 1.15 |      |      |      |      | 665  | 76.2  | 8.53 |
| Q6ZP82 | Coiled-coil domain-containing protein 141 OS=Homo sapiens<br>GN=CCDC141 PE=1 SV=1 - [CC141_HUMAN]  | 1.14  | 1 | 1 | 1 | 1  | 0.90 | 1.03 | 1.02 | 1.18 |      |      |      |      | 875  | 100.5 | 5.63 |
| Q8IYE0 | Coiled-coil domain-containing protein 146 OS=Homo sapiens<br>GN=CCDC146 PE=2 SV=2 - [CC146_HUMAN]  | 1.05  | 1 | 1 | 1 | 1  |      |      |      |      | 1.53 | 0.91 | 1.22 | 0.72 | 955  | 112.7 | 8.48 |
| Q5T655 | Coiled-coil domain-containing protein 147 OS=Homo sapiens<br>GN=CCDC147 PE=2 SV=1 - [CC147_HUMAN]  | 2.98  | 1 | 1 | 2 | 2  |      |      |      |      | 0.73 | 0.81 | 0.67 | 0.74 | 872  | 103.4 | 8.41 |
| A6NI56 | Coiled-coil domain-containing protein 154 OS=Homo sapiens<br>GN=CCDC154 PE=2 SV=4 - [CC154_HUMAN]  | 1.04  | 1 | 1 | 1 | 2  |      |      |      |      | 0.54 | 0.83 | 0.62 | 0.95 | 674  | 76.0  | 8.38 |
| Q8N6L0 | Coiled-coil domain-containing protein 155 OS=Homo sapiens<br>GN=CCDC155 PE=2 SV=2 - [CC155_HUMAN]  | 3.91  | 1 | 2 | 2 | 2  |      |      |      |      | 0.70 | 1.05 | 0.71 | 1.07 | 562  | 62.7  | 4.68 |
| Q569K6 | Coiled-coil domain-containing protein 157 OS=Homo sapiens<br>GN=CCDC157 PE=2 SV=3 - [CC157_HUMAN]  | 1.86  | 1 | 1 | 1 | 3  | 0.44 | 1.01 | 0.47 | 1.09 |      |      |      |      | 752  | 83.9  | 7.15 |
| Q5M9N0 | Coiled-coil domain-containing protein 158 OS=Homo sapiens<br>GN=CCDC158 PE=2 SV=2 - [CD158_HUMAN]  | 3.23  | 1 | 2 | 3 | 4  |      |      |      |      | 4.07 | 9.08 | 6.56 | #### | 1113 | 127.1 | 6.46 |
| A2VCL2 | Coiled-coil domain-containing protein 162 OS=Homo sapiens<br>GN=CCDC162P PE=2 SV=3 - [CC162_HUMAN] | 2.98  | 1 | 1 | 1 | 1  |      |      |      |      | 1.14 | 0.99 | 1.33 | 1.14 | 907  | 103.8 | 7.90 |
| Q9Y4B5 | Coiled-coil domain-containing protein 165 OS=Homo sapiens<br>GN=CCDC165 PE=1 SV=5 - [CC165_HUMAN]  | 1.57  | 1 | 2 | 2 | 3  | 0.52 | 0.63 | 0.21 | 0.26 | 0.45 | 0.46 | 0.46 | 0.47 | 1905 | 209.4 | 6.43 |
| Q9P0B6 | Coiled-coil domain-containing protein 167 OS=Homo sapiens<br>GN=CCDC167 PE=2 SV=2 - [CC167_HUMAN]  | 15.46 | 1 | 1 | 1 | 1  | 1.41 | 1.79 | 1.08 | 1.38 |      |      |      |      | 97   | 11.5  | 9.50 |
| Q8NDH2 | Coiled-coil domain-containing protein 168 OS=Homo sapiens<br>GN=CCDC168 PE=2 SV=2 - [CC168_HUMAN]  | 0.49  | 1 | 1 | 1 | 1  | 1.07 | 1.65 | 0.92 | 1.43 |      |      |      |      | 2452 | 277.8 | 9.31 |
| Q6TFL3 | Coiled-coil domain-containing protein 171 OS=Homo sapiens<br>GN=CCDC171 PE=2 SV=1 - [CC171_HUMAN]  | 2.34  | 1 | 2 | 2 | 3  | 1.03 | 1.10 | 1.04 | 1.12 |      |      |      |      | 1326 | 152.7 | 6.81 |
| Q5T9S5 | Coiled-coil domain-containing protein 18 OS=Homo sapiens<br>GN=CCDC18 PE=1 SV=1 - [CCD18_HUMAN]    | 1.86  | 1 | 2 | 2 | 4  | 0.85 | 0.82 | 0.91 | 0.89 | 0.75 | 0.86 | 0.69 | 0.79 | 1454 | 168.9 | 5.66 |
| Q8N4L8 | Coiled-coil domain-containing protein 24 OS=Homo sapiens<br>GN=CCDC24 PE=2 SV=1 - [CCD24_HUMAN]    | 5.54  | 1 | 1 | 1 | 9  |      |      |      |      | 1.83 | 2.07 | 1.73 | 1.98 | 307  | 34.3  | 7.02 |
| Q8IWP9 | Coiled-coil domain-containing protein 28A OS=Homo sapiens<br>GN=CCDC28A PE=1 SV=1 - [CC28A_HUMAN]  | 5.11  | 1 | 1 | 1 | 2  | 1.14 | 1.23 | 1.21 | 1.31 |      |      |      |      | 274  | 30.3  | 9.25 |
| Q9BUN5 | Coiled-coil domain-containing protein 28B OS=Homo sapiens<br>GN=CCDC28B PE=1 SV=2 - [CC28B_HUMAN]  | 7.50  | 1 | 1 | 1 | 13 | 0.73 | 0.88 | 0.75 | 0.91 | 0.80 | 0.64 | 0.87 | 0.59 | 200  | 22.0  | 5.36 |
| Q8N5R6 | Coiled-coil domain-containing protein 33 OS=Homo sapiens<br>GN=CCDC33 PE=1 SV=3 - [CCD33_HUMAN]    | 2.30  | 1 | 2 | 2 | 2  | 0.88 | 0.37 | 0.93 | 0.40 | 0.93 | 0.89 | 0.80 | 0.76 | 958  | 107.1 | 6.77 |
| Q494V2 | Coiled-coil domain-containing protein 37 OS=Homo sapiens<br>GN=CCDC37 PE=1 SV=1 - [CCD37_HUMAN]    | 5.07  | 1 | 3 | 3 | 5  | 1.80 | 1.74 | 1.74 | 1.58 | 0.27 | 0.25 | 0.23 | 0.22 | 611  | 71.1  | 7.11 |

|        |                                                                                                      |       |   |   |   |   |      |      |      |      |      |      |      |      |      |       |       |       |
|--------|------------------------------------------------------------------------------------------------------|-------|---|---|---|---|------|------|------|------|------|------|------|------|------|-------|-------|-------|
| Q502W7 | Coiled-coil domain-containing protein 38 OS=Homo sapiens GN=CCDC38 PE=2 SV=1 - [CCD38_HUMAN]         | 1.60  | 1 | 1 | 1 | 1 |      |      |      |      |      | 1.13 | 0.99 | 1.00 | 0.87 | 563   | 65.3  | 8.75  |
| Q9UFE4 | Coiled-coil domain-containing protein 39 OS=Homo sapiens GN=CCDC39 PE=2 SV=3 - [CCD39_HUMAN]         | 1.17  | 1 | 1 | 1 | 2 |      |      |      |      |      | 0.90 | 0.95 | 1.00 | 1.06 | 941   | 109.8 | 6.44  |
| Q4G0X9 | Coiled-coil domain-containing protein 40 OS=Homo sapiens GN=CCDC40 PE=2 SV=2 - [CCD40_HUMAN]         | 2.01  | 1 | 2 | 2 | 2 | 0.84 | 0.83 | 0.79 | 0.78 | 0.65 | 0.44 | 0.75 | 0.50 | 1142 | 130.0 | 5.29  |       |
| Q8NEL0 | Coiled-coil domain-containing protein 54 OS=Homo sapiens GN=CCDC54 PE=1 SV=2 - [CCD54_HUMAN]         | 2.44  | 1 | 1 | 1 | 2 |      |      |      |      |      | 0.99 | 0.93 | 1.00 | 0.94 | 328   | 37.9  | 8.37  |
| Q2TAC2 | Coiled-coil domain-containing protein 57 OS=Homo sapiens GN=CCDC57 PE=2 SV=2 - [CCD57_HUMAN]         | 2.07  | 1 | 1 | 2 | 6 | 1.36 | 1.32 | 1.14 | 1.11 |      |      |      |      | 916  | 103.1 | 6.55  |       |
| A2RUB6 | Coiled-coil domain-containing protein 66 OS=Homo sapiens GN=CCDC66 PE=1 SV=4 - [CCD66_HUMAN]         | 1.16  | 1 | 1 | 1 | 1 |      |      |      |      |      | 1.07 | 0.97 | 0.86 | 0.78 | 948   | 109.3 | 8.25  |
| Q05D60 | Coiled-coil domain-containing protein 67 OS=Homo sapiens GN=CCDC67 PE=2 SV=2 - [CCD67_HUMAN]         | 5.30  | 1 | 1 | 1 | 1 | 0.79 | 0.86 |      |      |      |      |      |      | 604  | 70.9  | 6.21  |       |
| Q8IV32 | Coiled-coil domain-containing protein 71 OS=Homo sapiens GN=CCDC71 PE=2 SV=3 - [CCD71_HUMAN]         | 2.14  | 1 | 1 | 1 | 1 |      |      |      |      |      | 0.95 | 0.17 | 0.68 | 0.12 | 467   | 49.6  | 11.80 |
| Q8N9Z2 | Coiled-coil domain-containing protein 71L OS=Homo sapiens GN=CCDC71L PE=2 SV=2 - [CC71L_HUMAN]       | 5.11  | 1 | 1 | 1 | 1 | 0.79 | 0.93 | 0.82 | 0.97 |      |      |      |      | 235  | 26.2  | 11.71 |       |
| Q9Y2S6 | Coiled-coil domain-containing protein 72 OS=Homo sapiens GN=CCDC72 PE=1 SV=1 - [CCD72_HUMAN]         | 12.50 | 1 | 1 | 1 | 1 |      |      |      |      |      | 1.85 | 1.98 | 1.57 | 1.68 | 64    | 7.1   | 9.99  |
| Q6ZRK6 | Coiled-coil domain-containing protein 73 OS=Homo sapiens GN=CCDC73 PE=1 SV=2 - [CCD73_HUMAN]         | 1.95  | 1 | 1 | 2 | 2 | 0.92 | 1.02 | 0.97 | 1.10 |      |      |      |      | 1079 | 124.1 | 5.58  |       |
| Q76M96 | Coiled-coil domain-containing protein 80 OS=Homo sapiens GN=CCDC80 PE=1 SV=1 - [CCD80_HUMAN]         | 2.95  | 1 | 1 | 1 | 2 | 1.03 | 0.85 | 1.13 | 1.02 |      |      |      |      | 950  | 108.1 | 9.72  |       |
| Q96PX6 | Coiled-coil domain-containing protein 85A OS=Homo sapiens GN=CCDC85A PE=2 SV=3 - [CC85A_HUMAN]       | 2.89  | 1 | 1 | 1 | 2 |      |      |      |      |      | 1.14 | 0.78 | 1.07 | 0.73 | 553   | 59.9  | 8.79  |
| Q9NVE4 | Coiled-coil domain-containing protein 87 OS=Homo sapiens GN=CCDC87 PE=2 SV=2 - [CCD87_HUMAN]         | 1.77  | 1 | 1 | 1 | 4 | 0.46 | 0.54 | 1.13 | 1.34 |      |      |      |      | 849  | 96.3  | 8.59  |       |
| A6NC98 | Coiled-coil domain-containing protein 88B OS=Homo sapiens GN=CCDC88B PE=1 SV=1 - [CC88B_HUMAN]       | 1.96  | 1 | 2 | 3 | 3 | 1.26 | 1.43 | 1.45 | 1.65 |      |      |      |      | 1476 | 164.7 | 5.11  |       |
| Q8N998 | Coiled-coil domain-containing protein 89 OS=Homo sapiens GN=CCDC89 PE=2 SV=1 - [CCD89_HUMAN]         | 5.35  | 1 | 2 | 2 | 6 | 1.21 | 1.20 | 1.31 | 1.31 |      |      |      |      | 374  | 43.8  | 5.36  |       |
| Q53HC0 | Coiled-coil domain-containing protein 92 OS=Homo sapiens GN=CCDC92 PE=2 SV=2 - [CCD92_HUMAN]         | 2.42  | 1 | 1 | 1 | 1 |      |      |      |      |      | 0.86 | 0.43 | 1.31 | 0.66 | 331   | 36.9  | 8.90  |
| Q9BW85 | Coiled-coil domain-containing protein 94 OS=Homo sapiens GN=CCDC94 PE=1 SV=1 - [CCD94_HUMAN]         | 4.02  | 1 | 1 | 1 | 1 |      |      |      |      |      | 0.90 | 1.43 | 1.05 | 1.69 | 323   | 37.1  | 5.92  |
| Q96F63 | Coiled-coil domain-containing protein 97 OS=Homo sapiens GN=CCDC97 PE=1 SV=1 - [CCD97_HUMAN]         | 14.29 | 1 | 2 | 2 | 2 |      |      |      |      |      | 1.47 | 1.44 | 1.32 | 1.29 | 343   | 38.9  | 4.59  |
| Q8IYT3 | Coiled-coil domain-containing protein C6orf97 OS=Homo sapiens GN=C6orf97 PE=2 SV=3 - [CF097_HUMAN]   | 2.80  | 1 | 2 | 2 | 5 | 1.35 | 1.40 | 1.47 | 1.54 | 1.77 | 2.09 | 1.60 | 1.89 | 715  | 82.2  | 6.64  |       |
| Q8NCU4 | Coiled-coil domain-containing protein KIAA1407 OS=Homo sapiens GN=KIAA1407 PE=2 SV=1 - [K1407_HUMAN] | 1.28  | 1 | 1 | 1 | 1 | 0.64 | 0.74 | 0.70 | 0.82 |      |      |      |      | 936  | 110.5 | 9.60  |       |
| P38432 | Coilin OS=Homo sapiens GN=COIL PE=1 SV=1 - [COIL_HUMAN]                                              | 2.60  | 1 | 1 | 1 | 1 |      |      |      |      |      | 0.80 | 0.28 | 0.95 | 0.33 | 576   | 62.6  | 9.07  |
| P02452 | Collagen alpha-1(I) chain OS=Homo sapiens GN=COL1A1 PE=1 SV=5 - [CO1A1_HUMAN]                        | 2.66  | 1 | 4 | 4 | 9 | 0.92 | 0.77 | 0.93 | 0.78 | 0.87 | 0.75 | 0.98 | 0.77 | 1464 | 138.9 | 5.80  |       |
| P02458 | Collagen alpha-1(II) chain OS=Homo sapiens GN=COL2A1 PE=1 SV=3 - [CO2A1_HUMAN]                       | 1.82  | 1 | 1 | 1 | 1 | 0.88 | 0.87 | 0.98 | 0.98 |      |      |      |      | 1487 | 141.7 | 6.92  |       |
| P20849 | Collagen alpha-1(IX) chain OS=Homo sapiens GN=COL9A1 PE=1 SV=3 - [CO9A1_HUMAN]                       | 1.63  | 1 | 1 | 1 | 1 | 1.10 | 1.12 | 1.09 | 1.12 |      |      |      |      | 921  | 91.8  | 8.72  |       |
| P20908 | Collagen alpha-1(V) chain OS=Homo sapiens GN=COL5A1 PE=1 SV=3 - [CO5A1_HUMAN]                        | 2.07  | 1 | 3 | 3 | 6 | 1.24 | 1.38 | 1.37 | 1.54 | 0.86 | 0.84 | 0.88 | 0.86 | 1838 | 183.4 | 5.06  |       |
| P12109 | Collagen alpha-1(VI) chain OS=Homo sapiens GN=COL6A1 PE=1 SV=3 - [CO6A1_HUMAN]                       | 4.47  | 1 | 3 | 3 | 5 | 1.40 | 1.30 | 1.23 | 1.14 |      |      |      |      | 1028 | 108.5 | 5.43  |       |

|        |                                                                                        |       |   |    |    |     |      |      |      |      |      |      |       |       |      |       |      |
|--------|----------------------------------------------------------------------------------------|-------|---|----|----|-----|------|------|------|------|------|------|-------|-------|------|-------|------|
| Q5TAT6 | Collagen alpha-1(XIII) chain OS=Homo sapiens GN=COL13A1 PE=1 SV=1 - [CODA1_HUMAN]      | 2.37  | 1 | 1  | 1  | 1   | 1.19 | 1.32 | 1.28 | 1.42 |      | 717  | 69.9  | 9.17  |      |       |      |
| Q14993 | Collagen alpha-1(XIX) chain OS=Homo sapiens GN=COL19A1 PE=1 SV=3 - [COJA1_HUMAN]       | 0.70  | 1 | 1  | 1  | 1   | 1.13 | 1.26 | 1.41 | 1.59 |      | 1142 | 115.1 | 8.32  |      |       |      |
| P39059 | Collagen alpha-1(XV) chain OS=Homo sapiens GN=COL15A1 PE=1 SV=2 - [COFA1_HUMAN]        | 1.59  | 1 | 2  | 2  | 4   |      |      | 0.94 | 1.03 | 0.96 | 1.02 | 1388  | 141.6 | 5.00 |       |      |
| Q07092 | Collagen alpha-1(XVI) chain OS=Homo sapiens GN=COL16A1 PE=1 SV=2 - [COGA1_HUMAN]       | 2.62  | 1 | 2  | 2  | 4   |      |      | 2.01 | 1.82 | 1.43 | 1.29 | 1604  | 157.7 | 7.84 |       |      |
| Q9UMD9 | Collagen alpha-1(XVII) chain OS=Homo sapiens GN=COL17A1 PE=1 SV=3 - [COHA1_HUMAN]      | 1.20  | 1 | 1  | 1  | 1   |      |      | 1.58 | 2.11 |      |      | 1497  | 150.3 | 8.79 |       |      |
| P39060 | Collagen alpha-1(XVIII) chain OS=Homo sapiens GN=COL18A1 PE=1 SV=5 - [COIA1_HUMAN]     | 5.42  | 1 | 6  | 6  | 33  | 0.81 | 0.83 | 0.91 | 0.93 | 1.11 | 1.18 | 1.06  | 1.07  | 1754 | 178.1 | 6.01 |
| Q8NFW1 | Collagen alpha-1(XXII) chain OS=Homo sapiens GN=COL22A1 PE=1 SV=2 - [COMA1_HUMAN]      | 1.29  | 1 | 1  | 1  | 1   |      |      |      | 0.70 |      |      | 1626  | 161.0 | 7.23 |       |      |
| Q86Y22 | Collagen alpha-1(XXIII) chain OS=Homo sapiens GN=COL23A1 PE=2 SV=1 - [CONA1_HUMAN]     | 2.78  | 1 | 1  | 1  | 1   |      |      | 1.01 | 1.04 | 1.03 | 1.07 | 540   | 51.9  | 7.25 |       |      |
| Q96A83 | Collagen alpha-1(XXVI) chain OS=Homo sapiens GN=EMID2 PE=2 SV=1 - [EMID2_HUMAN]        | 3.17  | 1 | 1  | 1  | 1   | 0.94 | 1.02 | 0.95 | 1.04 |      |      | 441   | 45.4  | 7.31 |       |      |
| Q2UY09 | Collagen alpha-1(XXVIII) chain OS=Homo sapiens GN=COL28A1 PE=2 SV=2 - [COSA1_HUMAN]    | 2.04  | 1 | 1  | 1  | 1   |      |      | 1.28 | 2.20 | 0.71 | 1.22 | 1125  | 116.6 | 6.40 |       |      |
| P08572 | Collagen alpha-2(IV) chain OS=Homo sapiens GN=COL4A2 PE=1 SV=4 - [CO4A2_HUMAN]         | 1.99  | 1 | 1  | 1  | 1   |      |      | 0.69 | 1.15 | 1.06 | 1.77 | 1712  | 167.4 | 8.66 |       |      |
| P05997 | Collagen alpha-2(V) chain OS=Homo sapiens GN=COL5A2 PE=1 SV=3 - [CO5A2_HUMAN]          | 3.94  | 1 | 3  | 3  | 4   | 1.25 | 1.06 | 1.40 | 1.17 |      |      | 1499  | 144.8 | 6.46 |       |      |
| P13942 | Collagen alpha-2(XI) chain OS=Homo sapiens GN=COL11A2 PE=1 SV=5 - [COBA2_HUMAN]        | 1.50  | 1 | 1  | 1  | 1   | 0.57 | 1.01 |      |      |      |      | 1736  | 171.7 | 6.21 |       |      |
| Q01955 | Collagen alpha-3(IV) chain OS=Homo sapiens GN=COL4A3 PE=1 SV=3 - [CO4A3_HUMAN]         | 3.35  | 1 | 2  | 2  | 7   | 1.01 | 1.00 | 1.13 | 1.13 | 0.99 | 1.10 | 0.91  | 1.01  | 1670 | 161.7 | 9.16 |
| Q14050 | Collagen alpha-3(IX) chain OS=Homo sapiens GN=COL9A3 PE=2 SV=2 - [CO9A3_HUMAN]         | 4.39  | 1 | 2  | 2  | 2   | 1.23 | 1.35 | 1.35 | 1.50 |      |      | 684   | 63.6  | 7.68 |       |      |
| P12111 | Collagen alpha-3(VI) chain OS=Homo sapiens GN=COL6A3 PE=1 SV=5 - [CO6A3_HUMAN]         | 14.07 | 1 | 33 | 33 | 115 | 0.94 | 0.93 | 0.96 | 0.93 | 0.92 | 0.92 | 0.96  | 0.94  | 3177 | 343.5 | 6.68 |
| A8TX70 | Collagen alpha-5(VI) chain OS=Homo sapiens GN=COL6A5 PE=1 SV=1 - [CO6A5_HUMAN]         | 1.22  | 1 | 1  | 1  | 1   |      |      | 1.84 | 1.61 | 3.55 | 3.10 | 2615  | 289.7 | 6.95 |       |      |
| Q14031 | Collagen alpha-6(IV) chain OS=Homo sapiens GN=COL4A6 PE=2 SV=3 - [CO4A6_HUMAN]         | 1.48  | 1 | 1  | 1  | 1   | 0.81 | 0.83 | 0.80 | 0.82 |      |      | 1691  | 163.7 | 9.20 |       |      |
| A6NMZ7 | Collagen alpha-6(VI) chain OS=Homo sapiens GN=COL6A6 PE=1 SV=2 - [CO6A6_HUMAN]         | 2.21  | 1 | 3  | 3  | 3   | 0.95 | 1.13 | 1.02 | 1.24 | 1.57 | 5.53 | 3.05  | ####  | 2263 | 247.0 | 6.89 |
| Q9Y6Z7 | Collectin-10 OS=Homo sapiens GN=COLEC10 PE=2 SV=2 - [COL10_HUMAN]                      | 9.39  | 1 | 3  | 3  | 5   | 0.97 | 0.93 | 0.93 | 0.90 |      |      | 277   | 30.7  | 7.33 |       |      |
| Q9BWP8 | Collectin-11 OS=Homo sapiens GN=COLEC11 PE=1 SV=1 - [COL11_HUMAN]                      | 11.44 | 1 | 3  | 3  | 10  | 0.94 | 0.98 | 0.97 | 1.02 | 1.08 | 1.15 | 1.09  | 1.17  | 271  | 28.6  | 5.41 |
| Q9Y6G5 | COMM domain-containing protein 10 OS=Homo sapiens GN=COMMD10 PE=1 SV=1 - [COMDA_HUMAN] | 5.94  | 1 | 1  | 1  | 1   |      |      | 1.15 | 0.95 | 7.22 | 5.95 | 202   | 23.0  | 6.54 |       |      |
| Q9H0A8 | COMM domain-containing protein 4 OS=Homo sapiens GN=COMMD4 PE=1 SV=1 - [COMD4_HUMAN]   | 10.55 | 1 | 1  | 1  | 1   | 1.15 | 1.16 | 1.21 | 1.23 |      |      | 199   | 21.8  | 7.31 |       |      |
| Q9GZQ3 | COMM domain-containing protein 5 OS=Homo sapiens GN=COMMD5 PE=1 SV=1 - [COMD5_HUMAN]   | 3.13  | 1 | 1  | 1  | 1   |      |      | 1.53 | 1.34 | 1.43 | 1.25 | 224   | 24.7  | 7.02 |       |      |
| Q86VX2 | COMM domain-containing protein 7 OS=Homo sapiens GN=COMMD7 PE=1 SV=2 - [COMD7_HUMAN]   | 12.50 | 1 | 1  | 1  | 2   | 1.70 | 1.62 | 1.72 | 1.66 |      |      | 200   | 22.5  | 5.92 |       |      |
| Q9NX08 | COMM domain-containing protein 8 OS=Homo sapiens GN=COMMD8 PE=1 SV=1 - [COMD8_HUMAN]   | 9.84  | 1 | 1  | 1  | 8   | 1.24 | 0.99 | 1.28 | 1.02 |      |      | 183   | 21.1  | 5.43 |       |      |
| P02745 | Complement C1q subcomponent subunit A OS=Homo sapiens GN=C1QA PE=1 SV=2 - [C1QA_HUMAN] | 31.84 | 1 | 7  | 7  | 83  | 1.36 | 1.35 | 1.39 | 1.41 | 0.85 | 1.04 | 0.89  | 0.97  | 245  | 26.0  | 9.11 |

|        |                                                                                                                         |       |   |     |     |       |      |      |      |      |      |      |      |      |      |       |      |
|--------|-------------------------------------------------------------------------------------------------------------------------|-------|---|-----|-----|-------|------|------|------|------|------|------|------|------|------|-------|------|
| P02746 | Complement C1q subcomponent subunit B OS=Homo sapiens GN=C1QB PE=1 SV=3 - [C1QB_HUMAN]                                  | 28.06 | 1 | 8   | 8   | 306   | 1.03 | 1.08 | 0.99 | 1.04 | 0.90 | 0.89 | 0.94 | 0.94 | 253  | 26.7  | 8.63 |
| P02747 | Complement C1q subcomponent subunit C OS=Homo sapiens GN=C1QC PE=1 SV=3 - [C1QC_HUMAN]                                  | 26.12 | 1 | 6   | 6   | 332   | 1.02 | 1.03 | 0.97 | 1.01 | 0.93 | 0.92 | 0.96 | 0.93 | 245  | 25.8  | 8.41 |
| Q9BXJ4 | Complement C1q tumor necrosis factor-related protein 3 OS=Homo sapiens GN=C1QTNF3 PE=2 SV=1 - [C1QTNF3_HUMAN]           | 8.13  | 1 | 2   | 2   | 4     | 1.00 | 1.12 | 0.89 | 1.01 |      |      |      |      | 246  | 27.0  | 6.52 |
| P00736 | Complement C1r subcomponent OS=Homo sapiens GN=C1R PE=1 SV=2 - [C1R_HUMAN]                                              | 41.42 | 1 | 23  | 25  | 363   | 1.05 | 1.02 | 1.08 | 1.05 | 0.84 | 0.82 | 0.88 | 0.85 | 705  | 80.1  | 6.21 |
| Q9NZP8 | Complement C1r subcomponent-like protein OS=Homo sapiens GN=C1RL PE=1 SV=2 - [C1RL_HUMAN]                               | 25.46 | 1 | 11  | 13  | 108   | 1.21 | 1.21 | 1.24 | 1.22 | 0.98 | 0.93 | 0.97 | 0.97 | 487  | 53.5  | 7.20 |
| P09871 | Complement C1s subcomponent OS=Homo sapiens GN=C1S PE=1 SV=1 - [C1S_HUMAN]                                              | 47.97 | 1 | 28  | 29  | 566   | 1.05 | 1.07 | 1.08 | 1.11 | 0.88 | 0.90 | 0.83 | 0.88 | 688  | 76.6  | 4.96 |
| P06681 | Complement C2 OS=Homo sapiens GN=C2 PE=1 SV=2 - [C2_HUMAN]                                                              | 50.00 | 1 | 35  | 35  | 483   | 1.04 | 1.05 | 1.07 | 1.06 | 1.00 | 1.06 | 1.07 | 1.06 | 752  | 83.2  | 7.42 |
| P01024 | Complement C3 OS=Homo sapiens GN=C3 PE=1 SV=2 - [C3_HUMAN]                                                              | 90.14 | 1 | 198 | 200 | 21930 | 1.04 | 1.06 | 1.05 | 1.09 | 1.06 | 1.13 | 1.03 | 1.11 | 1663 | 187.0 | 6.40 |
| P0C0L4 | Complement C4-A OS=Homo sapiens GN=C4A PE=1 SV=1 - [C4A_HUMAN]                                                          | 64.97 | 3 | 1   | 117 | 6582  | 0.90 | 0.76 | 0.88 | 0.78 | 0.91 | 0.74 | 1.06 | 0.82 | 1744 | 192.7 | 7.08 |
| P0C0L5 | Complement C4-B OS=Homo sapiens GN=C4B PE=1 SV=1 - [C4B_HUMAN]                                                          | 64.97 | 3 | 1   | 117 | 6634  | 0.73 | 0.72 | 0.78 | 0.75 | 0.68 | 0.66 | 0.81 | 0.80 | 1744 | 192.7 | 7.15 |
| P01031 | Complement C5 OS=Homo sapiens GN=C5 PE=1 SV=4 - [C5_HUMAN]                                                              | 50.42 | 1 | 74  | 74  | 805   | 1.04 | 1.13 | 1.04 | 1.11 | 1.12 | 1.10 | 1.07 | 1.04 | 1676 | 188.2 | 6.52 |
| Q07021 | Complement component 1 Q subcomponent-binding protein, mitochondrial OS=Homo sapiens GN=C1QBP PE=1 SV=1 - [C1QBP_HUMAN] | 4.61  | 1 | 1   | 1   | 1     |      |      |      |      | 1.50 | 1.13 | 2.08 | 1.58 | 282  | 31.3  | 4.84 |
| Q9NPY3 | Complement component C1q receptor OS=Homo sapiens GN=CD93 PE=1 SV=3 - [C1QR1_HUMAN]                                     | 13.80 | 1 | 5   | 5   | 17    | 0.97 | 0.87 | 0.89 | 0.93 |      |      |      |      | 652  | 68.5  | 5.44 |
| P13671 | Complement component C6 OS=Homo sapiens GN=C6 PE=1 SV=3 - [C6_HUMAN]                                                    | 55.89 | 4 | 43  | 43  | 578   | 1.00 | 0.94 | 0.99 | 0.96 | 0.92 | 0.89 | 0.92 | 0.95 | 934  | 104.7 | 6.76 |
| P10643 | Complement component C7 OS=Homo sapiens GN=C7 PE=1 SV=2 - [C7_HUMAN]                                                    | 63.82 | 2 | 40  | 40  | 512   | 1.22 | 1.19 | 1.19 | 1.18 | 1.04 | 1.06 | 1.01 | 1.03 | 843  | 93.5  | 6.48 |
| P07357 | Complement component C8 alpha chain OS=Homo sapiens GN=C8A PE=1 SV=2 - [C8A_HUMAN]                                      | 39.90 | 1 | 18  | 18  | 339   | 0.96 | 0.93 | 1.01 | 0.97 | 0.85 | 0.81 | 0.89 | 0.87 | 584  | 65.1  | 6.47 |
| P07358 | Complement component C8 beta chain OS=Homo sapiens GN=C8B PE=1 SV=3 - [C8B_HUMAN]                                       | 41.29 | 1 | 23  | 24  | 330   | 0.98 | 1.03 | 1.02 | 1.04 | 0.89 | 0.91 | 0.82 | 0.87 | 591  | 67.0  | 8.13 |
| P07360 | Complement component C8 gamma chain OS=Homo sapiens GN=C8G PE=1 SV=3 - [C8G_HUMAN]                                      | 66.34 | 1 | 11  | 11  | 172   | 1.06 | 1.12 | 1.05 | 1.11 | 1.01 | 1.04 | 0.93 | 1.04 | 202  | 22.3  | 8.31 |
| P02748 | Complement component C9 OS=Homo sapiens GN=C9 PE=1 SV=2 - [C9_HUMAN]                                                    | 57.78 | 2 | 31  | 32  | 535   | 1.00 | 1.07 | 1.08 | 1.12 | 0.88 | 0.90 | 0.87 | 0.87 | 559  | 63.1  | 5.59 |
| P08174 | Complement decay-accelerating factor OS=Homo sapiens GN=CD55 PE=1 SV=4 - [DAF_HUMAN]                                    | 6.04  | 1 | 3   | 3   | 5     | 1.09 | 1.00 | 1.14 | 1.04 |      |      |      |      | 381  | 41.4  | 7.59 |
| P00751 | Complement factor B OS=Homo sapiens GN=CFB PE=1 SV=2 - [CFAB_HUMAN]                                                     | 61.26 | 1 | 51  | 51  | 1909  | 1.01 | 0.98 | 1.00 | 0.99 | 0.98 | 1.01 | 0.96 | 1.00 | 764  | 85.5  | 7.06 |
| P00746 | Complement factor D OS=Homo sapiens GN=CFD PE=1 SV=5 - [CFAD_HUMAN]                                                     | 52.17 | 1 | 11  | 11  | 91    | 1.01 | 0.98 | 1.05 | 1.06 | 0.87 | 0.84 | 0.92 | 0.85 | 253  | 27.0  | 7.71 |
| P08603 | Complement factor H OS=Homo sapiens GN=CFH PE=1 SV=4 - [CFAH_HUMAN]                                                     | 60.93 | 1 | 60  | 67  | 2820  | 1.02 | 0.96 | 1.02 | 0.97 | 1.03 | 1.02 | 1.00 | 1.01 | 1231 | 139.0 | 6.61 |
| Q03591 | Complement factor H-related protein 1 OS=Homo sapiens GN=CFHR1 PE=1 SV=2 - [FHR1_HUMAN]                                 | 48.18 | 1 | 3   | 15  | 398   | 0.97 | 0.76 | 0.91 | 0.66 | 0.79 | 0.84 | 0.79 | 0.85 | 330  | 37.6  | 7.39 |
| P36980 | Complement factor H-related protein 2 OS=Homo sapiens GN=CFHR2 PE=1 SV=1 - [FHR2_HUMAN]                                 | 47.04 | 1 | 5   | 11  | 358   | 1.25 | 1.20 | 1.20 | 1.09 | 1.25 | 1.12 | 1.20 | 1.06 | 270  | 30.6  | 6.38 |
| Q02985 | Complement factor H-related protein 3 OS=Homo sapiens GN=CFHR3 PE=1 SV=2 - [FHR3_HUMAN]                                 | 26.36 | 1 | 2   | 8   | 96    | 0.87 | 0.91 | 0.91 | 0.98 | 0.88 | 0.77 | 0.98 | 0.87 | 330  | 37.3  | 7.55 |
| Q92496 | Complement factor H-related protein 4 OS=Homo sapiens GN=CFHR4 PE=1 SV=2 - [FHR4_HUMAN]                                 | 20.54 | 1 | 1   | 6   | 65    | 1.11 | 0.99 | 0.95 | 0.87 | 0.81 | 0.64 | 0.87 | 0.73 | 331  | 37.3  | 5.26 |

|         |                                                                                                                     |       |   |    |    |     |      |      |      |      |      |      |      |      |      |       |      |
|---------|---------------------------------------------------------------------------------------------------------------------|-------|---|----|----|-----|------|------|------|------|------|------|------|------|------|-------|------|
| Q9BXR6  | Complement factor H-related protein 5 OS=Homo sapiens GN=CFHR5 PE=1 SV=1 - [FHR5_HUMAN]                             | 36.03 | 1 | 19 | 20 | 113 | 1.16 | 1.10 | 1.29 | 1.23 | 0.82 | 0.91 | 0.76 | 0.83 | 569  | 64.4  | 7.06 |
| P05156  | Complement factor I OS=Homo sapiens GN=CFI PE=1 SV=2 - [CFAI_HUMAN]                                                 | 46.31 | 1 | 28 | 29 | 433 | 1.09 | 1.01 | 1.09 | 1.02 | 0.90 | 0.83 | 0.87 | 0.81 | 583  | 65.7  | 7.50 |
| P17927  | Complement receptor type 1 OS=Homo sapiens GN=CR1 PE=1 SV=3 - [CR1_HUMAN]                                           | 1.18  | 1 | 1  | 1  | 2   | 1.57 | 1.28 | 1.29 | 1.06 |      |      |      |      | 2039 | 223.5 | 6.95 |
| Q15021  | Condensin complex subunit 1 OS=Homo sapiens GN=NCAPD2 PE=1 SV=3 - [CND1_HUMAN]                                      | 3.07  | 1 | 2  | 2  | 3   |      |      |      |      | 0.64 | 0.56 | 1.01 | 0.88 | 1401 | 157.1 | 6.61 |
| Q15003  | Condensin complex subunit 2 OS=Homo sapiens GN=NCAPH PE=1 SV=3 - [CND2_HUMAN]                                       | 1.08  | 1 | 1  | 1  | 1   |      |      |      |      | 2.38 | 1.69 | 1.87 | 1.33 | 741  | 82.5  | 5.06 |
| Q9BPX3  | Condensin complex subunit 3 OS=Homo sapiens GN=NCAPG PE=1 SV=1 - [CND3_HUMAN]                                       | 3.45  | 1 | 1  | 1  | 1   | 0.89 | 0.83 | 0.44 | 0.41 |      |      |      |      | 1015 | 114.3 | 5.59 |
| Q86X12  | Condensin-2 complex subunit G2 OS=Homo sapiens GN=NCAPG2 PE=1 SV=1 - [CNDG2_HUMAN]                                  | 1.92  | 1 | 1  | 1  | 1   | 2.27 | 0.88 | 2.74 | 1.07 |      |      |      |      | 1143 | 130.9 | 6.87 |
| P51160  | Cone cGMP-specific 3',5'-cyclic phosphodiesterase subunit alpha' OS=Homo sapiens GN=PDE6C PE=1 SV=2 - [PDE6C_HUMAN] | 1.17  | 1 | 1  | 1  | 1   | 0.43 | 0.85 | 0.24 | 0.46 |      |      |      |      | 858  | 99.1  | 5.72 |
| O43186  | Cone-rod homeobox protein OS=Homo sapiens GN=CRX PE=1 SV=1 - [CRX_HUMAN]                                            | 1.34  | 1 | 1  | 1  | 1   |      |      |      |      | 0.74 | 0.81 | 0.79 | 0.87 | 299  | 32.2  | 9.16 |
| P29279  | Connective tissue growth factor OS=Homo sapiens GN=CTGF PE=1 SV=2 - [CTGF_HUMAN]                                    | 12.32 | 1 | 4  | 4  | 8   | 0.66 | 0.63 | 0.67 | 0.65 | 0.93 | 0.95 | 1.04 | 0.98 | 349  | 38.1  | 8.00 |
| Q96JB2  | Conserved oligomeric Golgi complex subunit 3 OS=Homo sapiens GN=COG3 PE=1 SV=3 - [COG3_HUMAN]                       | 9.30  | 1 | 4  | 4  | 8   | 1.18 | 1.28 | 1.11 | 1.21 | 0.67 | 0.88 | 0.63 | 0.82 | 828  | 94.0  | 5.57 |
| Q9UP83  | Conserved oligomeric Golgi complex subunit 5 OS=Homo sapiens GN=COG5 PE=1 SV=3 - [COG5_HUMAN]                       | 7.63  | 8 | 3  | 4  | 4   | 0.69 | 0.49 | 0.78 | 0.71 |      |      |      |      | 839  | 92.7  | 6.60 |
| Q9Y2V7  | Conserved oligomeric Golgi complex subunit 6 OS=Homo sapiens GN=COG6 PE=2 SV=2 - [COG6_HUMAN]                       | 4.26  | 1 | 1  | 2  | 25  | 0.67 | 1.27 | 0.87 | 1.64 |      |      |      |      | 657  | 73.2  | 5.76 |
| Q96MW5  | Conserved oligomeric Golgi complex subunit 8 OS=Homo sapiens GN=COG8 PE=1 SV=2 - [COG8_HUMAN]                       | 1.96  | 1 | 1  | 1  | 2   |      |      |      |      | 0.66 | 0.70 | 0.86 | 0.91 | 612  | 68.4  | 5.20 |
| Q9NZB2  | Constitutive coactivator of PPAR-gamma-like protein 1 OS=Homo sapiens GN=FAM120A PE=1 SV=2 - [F120A_HUMAN]          | 1.97  | 1 | 2  | 2  | 3   | 0.58 | 0.64 | 0.59 | 0.65 | 0.78 | 0.89 | 1.27 | 1.46 | 1118 | 121.8 | 8.88 |
| Q9NX05  | Constitutive coactivator of PPAR-gamma-like protein 2 OS=Homo sapiens GN=FAM120C PE=2 SV=3 - [F120C_HUMAN]          | 1.73  | 1 | 1  | 1  | 1   |      |      |      |      | 0.91 | 1.00 | 0.97 | 1.07 | 1096 | 120.5 | 9.03 |
| Q12860  | Contactin-1 OS=Homo sapiens GN=CNTN1 PE=1 SV=1 - [CNTN1_HUMAN]                                                      | 11.39 | 1 | 9  | 9  | 23  | 1.09 | 1.04 | 1.00 | 0.97 | 0.80 | 0.73 | 0.97 | 0.76 | 1018 | 113.2 | 5.90 |
| Q9P232  | Contactin-3 OS=Homo sapiens GN=CNTN3 PE=1 SV=3 - [CNTN3_HUMAN]                                                      | 5.25  | 1 | 4  | 4  | 6   | 0.98 | 1.01 | 1.04 | 1.08 | 0.82 | 0.64 | 0.88 | 0.68 | 1028 | 112.8 | 6.30 |
| Q8I WV2 | Contactin-4 OS=Homo sapiens GN=CNTN4 PE=1 SV=1 - [CNTN4_HUMAN]                                                      | 2.92  | 1 | 3  | 3  | 5   | 0.97 | 0.98 | 0.96 | 0.97 | 0.93 | 1.23 | 1.50 | 1.99 | 1026 | 113.4 | 7.47 |
| O94779  | Contactin-5 OS=Homo sapiens GN=CNTN5 PE=2 SV=2 - [CNTN5_HUMAN]                                                      | 2.64  | 1 | 2  | 2  | 2   | 0.72 | 0.85 | 0.68 | 0.79 |      |      |      |      | 1100 | 120.6 | 6.34 |
| Q9UHC6  | Contactin-associated protein-like 2 OS=Homo sapiens GN=CNTNAP2 PE=1 SV=1 - [CNTP2_HUMAN]                            | 1.28  | 1 | 1  | 1  | 1   |      |      |      |      | 1.10 | 1.56 | 1.54 | 2.20 | 1331 | 148.1 | 6.58 |
| Q8WYK1  | Contactin-associated protein-like 5 OS=Homo sapiens GN=CNTNAP5 PE=2 SV=1 - [CNTP5_HUMAN]                            | 4.36  | 1 | 2  | 2  | 2   |      |      |      |      | 0.88 | 0.87 | 0.96 | 0.94 | 1306 | 145.5 | 6.29 |
| Q96A23  | Copine-4 OS=Homo sapiens GN=CPNE4 PE=2 SV=1 - [CPNE4_HUMAN]                                                         | 1.62  | 1 | 1  | 1  | 1   | 0.31 | 0.28 | 0.18 | 0.17 |      |      |      |      | 557  | 62.4  | 6.33 |
| Q8IYJ1  | Copine-9 OS=Homo sapiens GN=CPNE9 PE=1 SV=3 - [CPNE9_HUMAN]                                                         | 1.81  | 1 | 1  | 1  | 2   | 0.58 | 0.40 | 0.63 | 0.43 |      |      |      |      | 553  | 61.8  | 5.34 |
| Q04656  | Copper-transporting ATPase 1 OS=Homo sapiens GN=ATP7A PE=1 SV=3 - [ATP7A_HUMAN]                                     | 1.20  | 1 | 1  | 1  | 1   | 1.31 | 1.25 | 1.25 | 1.20 |      |      |      |      | 1500 | 163.3 | 6.24 |
| P35670  | Copper-transporting ATPase 2 OS=Homo sapiens GN=ATP7B PE=1 SV=4 - [ATP7B_HUMAN]                                     | 2.87  | 1 | 2  | 2  | 2   | 1.10 | 1.25 | 1.00 | 1.14 | 1.24 | 1.16 | 0.83 | 0.78 | 1465 | 157.2 | 6.70 |
| Q53SF7  | Cordon-bleu protein-like 1 OS=Homo sapiens GN=COBLL1 PE=1 SV=2 - [COBL1_HUMAN]                                      | 3.99  | 1 | 3  | 3  | 4   | 1.16 | 1.45 | 1.21 | 1.52 | 0.79 | 0.83 | 0.83 | 0.87 | 1204 | 131.7 | 6.67 |

|        |                                                                                                   |       |   |    |    |     |      |      |      |      |      |      |      |      |      |       |      |      |      |
|--------|---------------------------------------------------------------------------------------------------|-------|---|----|----|-----|------|------|------|------|------|------|------|------|------|-------|------|------|------|
| O75367 | Core histone macro-H2A.1 OS=Homo sapiens GN=H2AFY PE=1 SV=4 - [H2AY_HUMAN]                        | 4.03  | 1 | 1  | 1  | 1   | 1.27 | 1.10 | 1.11 | 0.98 |      |      |      |      |      |       | 372  | 39.6 | 9.79 |
| Q9UBG3 | Cornulin OS=Homo sapiens GN=CRNN PE=1 SV=1 - [CRNN_HUMAN]                                         | 6.26  | 1 | 1  | 1  | 1   | 0.54 | 0.58 | 0.69 | 0.74 |      |      |      |      |      |       | 495  | 53.5 | 6.10 |
| P31146 | Coronin-1A OS=Homo sapiens GN=CORO1A PE=1 SV=4 - [COR1A_HUMAN]                                    | 11.28 | 1 | 5  | 5  | 10  | 0.86 | 0.80 | 0.86 | 0.81 | 1.97 | 1.99 | 1.93 | 1.95 | 461  | 51.0  | 6.68 |      |      |
| Q9BR76 | Coronin-1B OS=Homo sapiens GN=CORO1B PE=1 SV=1 - [COR1B_HUMAN]                                    | 7.16  | 1 | 2  | 2  | 2   | 0.99 | 1.16 | 0.93 | 1.10 | 3.12 | 3.42 | 489  | 54.2 | 5.88 |       |      |      |      |
| Q9ULV4 | Coronin-1C OS=Homo sapiens GN=CORO1C PE=1 SV=1 - [COR1C_HUMAN]                                    | 12.45 | 1 | 5  | 5  | 11  | 0.54 | 0.49 | 0.57 | 0.51 | 1.33 | 1.50 | 1.37 | 1.55 | 474  | 53.2  | 7.08 |      |      |
| Q8WZ74 | Cortactin-binding protein 2 OS=Homo sapiens GN=CTTNBP2 PE=1 SV=1 - [CTTB2_HUMAN]                  | 0.72  | 1 | 1  | 1  | 1   |      |      |      |      | 0.66 | 0.75 | 0.69 | 0.78 | 1663 | 180.9 | 7.93 |      |      |
| P06850 | Corticoliberin OS=Homo sapiens GN=CRH PE=1 SV=1 - [CRF_HUMAN]                                     | 16.33 | 1 | 1  | 1  | 1   | 1.19 | 0.76 | 0.99 | 0.63 |      |      |      |      | 196  | 21.4  | 9.96 |      |      |
| P08185 | Corticosteroid-binding globulin OS=Homo sapiens GN=SERPINA6 PE=1 SV=1 - [CBG_HUMAN]               | 56.05 | 1 | 14 | 14 | 275 | 1.30 | 1.33 | 1.30 | 1.32 | 1.13 | 1.13 | 1.06 | 1.06 | 405  | 45.1  | 6.04 |      |      |
| P34998 | Corticotropin-releasing factor receptor 1 OS=Homo sapiens GN=CRHR1 PE=1 SV=1 - [CRFR1_HUMAN]      | 1.13  | 1 | 1  | 1  | 3   |      |      |      |      | 1.68 | 1.46 | 1.67 | 1.45 | 444  | 50.7  | 9.33 |      |      |
| P24387 | Corticotropin-releasing factor-binding protein OS=Homo sapiens GN=CRHBP PE=1 SV=2 - [CRHBP_HUMAN] | 7.45  | 1 | 1  | 1  | 1   | 1.20 | 0.84 | 1.34 | 0.94 |      |      |      |      | 322  | 36.1  | 6.52 |      |      |
| Q9P1F3 | Costars family protein ABRACL OS=Homo sapiens GN=ABRACL PE=1 SV=1 - [ABRAL_HUMAN]                 | 16.05 | 1 | 1  | 1  | 1   |      |      |      |      | 1.71 | 1.41 | 1.40 | 1.15 | 81   | 9.1   | 6.29 |      |      |
| P10589 | COUP transcription factor 1 OS=Homo sapiens GN=NR2F1 PE=1 SV=1 - [COT1_HUMAN]                     | 7.33  | 1 | 1  | 1  | 1   | 0.73 | 0.85 | 0.78 | 0.91 |      |      |      |      | 423  | 46.1  | 8.25 |      |      |
| Q9P0U4 | CpG-binding protein OS=Homo sapiens GN=CXXC1 PE=1 SV=2 - [CXXC1_HUMAN]                            | 1.37  | 1 | 1  | 1  | 1   |      |      |      |      | 0.43 | 0.33 | 0.31 | 0.24 | 656  | 75.7  | 8.24 |      |      |
| P06732 | Creatine kinase M-type OS=Homo sapiens GN=CKM PE=1 SV=2 - [KCRM_HUMAN]                            | 2.62  | 1 | 1  | 1  | 2   | 0.82 | 0.81 | 0.71 | 0.71 |      |      |      |      | 381  | 43.1  | 7.25 |      |      |
| Q9NS37 | CREB/ATF bZIP transcription factor OS=Homo sapiens GN=CREBZF PE=1 SV=2 - [ZHANG_HUMAN]            | 5.37  | 1 | 1  | 1  | 1   | 0.74 | 0.77 | 0.83 | 0.87 |      |      |      |      | 354  | 37.1  | 5.24 |      |      |
| P46109 | Crk-like protein OS=Homo sapiens GN=CRKL PE=1 SV=1 - [CRKL_HUMAN]                                 | 27.39 | 1 | 7  | 7  | 24  | 0.94 | 0.48 | 0.80 | 0.51 | 1.09 | 1.19 | 1.20 | 1.20 | 303  | 33.8  | 6.74 |      |      |
| Q9BZJ0 | Crooked neck-like protein 1 OS=Homo sapiens GN=CRNKL1 PE=1 SV=4 - [CRNL1_HUMAN]                   | 0.94  | 1 | 1  | 1  | 1   | 1.49 | 1.62 | 1.78 | 1.96 |      |      |      |      | 848  | 100.4 | 8.00 |      |      |
| Q2NKJ3 | CST complex subunit CTC1 OS=Homo sapiens GN=CTC1 PE=1 SV=2 - [CTC1_HUMAN]                         | 1.15  | 1 | 1  | 1  | 1   | 1.07 | 1.03 | 0.86 | 0.83 |      |      |      |      | 1217 | 134.5 | 7.88 |      |      |
| Q9P2B4 | CTTNBP2 N-terminal-like protein OS=Homo sapiens GN=CTTNBP2NL PE=1 SV=2 - [CT2NL_HUMAN]            | 2.35  | 1 | 1  | 1  | 2   | 0.91 | 0.78 | 0.88 | 0.77 |      |      |      |      | 639  | 70.1  | 8.06 |      |      |
| Q96PZ7 | CUB and sushi domain-containing protein 1 OS=Homo sapiens GN=CSMD1 PE=1 SV=2 - [CSMD1_HUMAN]      | 0.81  | 1 | 1  | 1  | 3   | 1.22 | 1.30 | 1.17 | 1.24 |      |      |      |      | 3565 | 388.6 | 6.07 |      |      |
| Q7Z408 | CUB and sushi domain-containing protein 2 OS=Homo sapiens GN=CSMD2 PE=1 SV=2 - [CSMD2_HUMAN]      | 0.66  | 1 | 1  | 1  | 1   |      |      |      |      | 0.34 | 0.16 | 0.58 | 0.27 | 3487 | 379.8 | 6.09 |      |      |
| O60494 | Cubilin OS=Homo sapiens GN=CUBN PE=1 SV=5 - [CUBN_HUMAN]                                          | 0.80  | 1 | 1  | 1  | 2   | 1.50 | 2.01 | 1.31 | 1.77 |      |      |      |      | 3623 | 398.5 | 5.35 |      |      |
| Q8N6W0 | CUGBP Elav-like family member 5 OS=Homo sapiens GN=CELF5 PE=1 SV=1 - [CELF5_HUMAN]                | 1.65  | 2 | 1  | 1  | 2   | 0.94 | 1.12 | 0.91 | 1.08 | 1.05 | 1.07 | 1.09 | 1.10 | 485  | 52.3  | 8.32 |      |      |
| Q13619 | Cullin-4A OS=Homo sapiens GN=CUL4A PE=1 SV=3 - [CUL4A_HUMAN]                                      | 2.24  | 1 | 2  | 2  | 4   | 1.27 | 1.31 | 1.43 | 1.48 | 1.02 | 0.95 | 0.89 | 0.83 | 759  | 87.6  | 8.13 |      |      |
| Q13620 | Cullin-4B OS=Homo sapiens GN=CUL4B PE=1 SV=4 - [CUL4B_HUMAN]                                      | 2.96  | 1 | 2  | 2  | 2   | 1.23 | 1.06 | 1.35 | 1.16 |      |      |      |      | 913  | 103.9 | 7.37 |      |      |
| Q14999 | Cullin-7 OS=Homo sapiens GN=CUL7 PE=1 SV=2 - [CUL7_HUMAN]                                         | 0.65  | 1 | 1  | 1  | 2   | 0.86 | 0.75 | 1.92 | 1.67 |      |      |      |      | 1698 | 191.0 | 5.87 |      |      |
| Q8IWT3 | Cullin-9 OS=Homo sapiens GN=CUL9 PE=1 SV=2 - [CUL9_HUMAN]                                         | 2.42  | 1 | 3  | 3  | 22  | 1.35 | 0.91 | 1.17 | 0.78 | 0.93 | 0.96 | 1.10 | 1.12 | 2517 | 281.0 | 5.45 |      |      |

|        |                                                                                                                     |       |   |   |   |    |      |      |      |      |      |      |      |      |      |       |      |      |       |      |
|--------|---------------------------------------------------------------------------------------------------------------------|-------|---|---|---|----|------|------|------|------|------|------|------|------|------|-------|------|------|-------|------|
| Q86VP6 | Cullin-associated NEDD8-dissociated protein 1 OS=Homo sapiens GN=CAND1 PE=1 SV=2 - [CAND1_HUMAN]                    | 1.54  | 1 | 1 | 1 | 1  | 1.02 | 0.89 | 1.09 | 0.96 |      |      |      |      |      |       |      | 1230 | 136.3 | 5.78 |
| O75155 | Cullin-associated NEDD8-dissociated protein 2 OS=Homo sapiens GN=CAND2 PE=1 SV=3 - [CAND2_HUMAN]                    | 1.05  | 1 | 1 | 1 | 1  | 1.20 | 1.31 | 1.28 | 1.41 |      |      |      |      |      |       |      | 1236 | 135.2 | 5.68 |
| Q2TBE0 | CWF19-like protein 2 OS=Homo sapiens GN=CWF19L2 PE=1 SV=4 - [C19L2_HUMAN]                                           | 1.34  | 1 | 1 | 1 | 2  |      |      |      |      | 2.81 | 2.84 | 2.52 | 2.55 | 894  | 103.7 | 8.65 |      |       |      |
| Q14D33 | CXXC-type zinc finger protein 11 OS=Homo sapiens GN=CXXC11 PE=2 SV=2 - [CB085_HUMAN]                                | 4.90  | 1 | 1 | 1 | 1  | 0.96 | 1.09 | 1.03 | 1.17 |      |      |      |      |      |       |      | 572  | 60.4  | 6.57 |
| P18846 | Cyclic AMP-dependent transcription factor ATF-1 OS=Homo sapiens GN=ATF1 PE=1 SV=2 - [ATF1_HUMAN]                    | 12.55 | 1 | 2 | 2 | 2  | 1.17 | 1.10 | 1.20 | 1.14 | 0.44 | 0.09 | 0.79 | 0.16 | 271  | 29.2  | 8.37 |      |       |      |
| P15336 | Cyclic AMP-dependent transcription factor ATF-2 OS=Homo sapiens GN=ATF2 PE=1 SV=4 - [ATF2_HUMAN]                    | 7.52  | 1 | 1 | 1 | 1  | 0.44 | 0.57 | 0.39 | 0.51 |      |      |      |      |      |       |      | 505  | 54.5  | 7.88 |
| Q9Y2D1 | Cyclic AMP-dependent transcription factor ATF-5 OS=Homo sapiens GN=ATF5 PE=1 SV=4 - [ATF5_HUMAN]                    | 10.28 | 1 | 1 | 1 | 1  | 0.34 | 0.35 | 0.54 | 0.55 |      |      |      |      |      |       |      | 282  | 30.7  | 4.97 |
| Q68CJ9 | Cyclic AMP-responsive element-binding protein 3-like protein 3 OS=Homo sapiens GN=CREB3L3 PE=1 SV=2 - [CR3L3_HUMAN] | 9.54  | 1 | 2 | 2 | 3  |      |      |      |      | 0.16 | 0.40 | 0.74 | 1.84 | 461  | 49.0  | 5.15 |      |       |      |
| Q14028 | Cyclic nucleotide-gated cation channel beta-1 OS=Homo sapiens GN=CNGB1 PE=1 SV=2 - [CNGB1_HUMAN]                    | 2.00  | 1 | 1 | 1 | 1  | 1.25 | 1.31 | 1.50 | 1.58 |      |      |      |      |      |       |      | 1251 | 139.6 | 4.81 |
| Q9NQW8 | Cyclic nucleotide-gated cation channel beta-3 OS=Homo sapiens GN=CNGB3 PE=1 SV=2 - [CNGB3_HUMAN]                    | 1.11  | 1 | 1 | 1 | 1  | 0.58 | 0.41 | 0.67 | 0.48 |      |      |      |      |      |       |      | 809  | 92.1  | 7.93 |
| Q8N815 | Cyclin N-terminal domain-containing protein 1 OS=Homo sapiens GN=CNTD1 PE=2 SV=2 - [CNTD1_HUMAN]                    | 3.03  | 1 | 1 | 1 | 1  |      |      |      |      | 0.94 | 2.05 | 0.57 | 1.24 | 330  | 36.9  | 6.93 |      |       |      |
| O95273 | Cyclin-D1-binding protein 1 OS=Homo sapiens GN=CCNDBP1 PE=1 SV=2 - [CCDB1_HUMAN]                                    | 6.11  | 1 | 1 | 1 | 1  | 1.74 | 1.33 | 1.00 | 0.78 |      |      |      |      |      |       |      | 360  | 40.2  | 4.82 |
| Q9NYV4 | Cyclin-dependent kinase 12 OS=Homo sapiens GN=CDK12 PE=1 SV=2 - [CDK12_HUMAN]                                       | 2.62  | 1 | 1 | 1 | 1  | 0.50 | 0.80 | 0.40 | 0.65 |      |      |      |      |      |       |      | 1490 | 164.1 | 9.44 |
| P55273 | Cyclin-dependent kinase 4 inhibitor D OS=Homo sapiens GN=CDKN2D PE=1 SV=1 - [CDN2D_HUMAN]                           | 6.63  | 1 | 1 | 1 | 3  |      |      |      |      | 2.17 | 2.21 | 1.83 | 1.87 | 166  | 17.7  | 6.13 |      |       |      |
| Q00534 | Cyclin-dependent kinase 6 OS=Homo sapiens GN=CDK6 PE=1 SV=1 - [CDK6_HUMAN]                                          | 11.66 | 1 | 2 | 2 | 2  |      |      |      |      | 1.74 | 1.63 | 1.43 | 1.33 | 326  | 36.9  | 6.46 |      |       |      |
| P50613 | Cyclin-dependent kinase 7 OS=Homo sapiens GN=CDK7 PE=1 SV=1 - [CDK7_HUMAN]                                          | 2.60  | 1 | 1 | 1 | 1  | 0.87 | 0.85 | 0.68 | 0.67 |      |      |      |      |      |       |      | 346  | 39.0  | 8.47 |
| Q8IVW4 | Cyclin-dependent kinase-like 3 OS=Homo sapiens GN=CDKL3 PE=2 SV=1 - [CDKL3_HUMAN]                                   | 6.08  | 1 | 1 | 1 | 1  |      |      |      |      | 0.31 | 0.57 |      |      |      |       |      | 592  | 67.5  | 9.31 |
| O76039 | Cyclin-dependent kinase-like 5 OS=Homo sapiens GN=CDKL5 PE=1 SV=1 - [CDKL5_HUMAN]                                   | 3.30  | 1 | 2 | 2 | 2  |      |      |      |      | 0.99 | 1.00 | 0.92 | 0.93 | 1030 | 115.5 | 9.54 |      |       |      |
| Q16589 | Cyclin-G2 OS=Homo sapiens GN=CCNG2 PE=1 SV=1 - [CCNG2_HUMAN]                                                        | 4.94  | 1 | 1 | 1 | 2  |      |      |      |      | 1.32 | 1.17 | 1.30 | 1.14 | 344  | 38.8  | 5.48 |      |       |      |
| O60583 | Cyclin-T2 OS=Homo sapiens GN=CCNT2 PE=1 SV=2 - [CCNT2_HUMAN]                                                        | 2.60  | 1 | 1 | 1 | 5  |      |      |      |      | 1.39 | 1.66 | 1.78 | 2.14 | 730  | 81.0  | 8.92 |      |       |      |
| Q8ND76 | Cyclin-Y OS=Homo sapiens GN=CCNY PE=1 SV=2 - [CCNY_HUMAN]                                                           | 5.57  | 1 | 1 | 1 | 1  | 1.37 | 1.53 | 1.30 | 1.46 |      |      |      |      |      |       |      | 341  | 39.3  | 7.20 |
| P01040 | Cystatin-A OS=Homo sapiens GN=CSTA PE=1 SV=1 - [CYTA_HUMAN]                                                         | 15.31 | 1 | 2 | 2 | 3  |      |      |      |      | 1.18 | 1.09 | 1.15 | 1.05 | 98   | 11.0  | 5.50 |      |       |      |
| P04080 | Cystatin-B OS=Homo sapiens GN=CSTB PE=1 SV=2 - [CYTB_HUMAN]                                                         | 12.24 | 1 | 1 | 1 | 3  |      |      |      |      | 1.61 | 1.83 | 1.28 | 1.45 | 98   | 11.1  | 7.56 |      |       |      |
| P01034 | Cystatin-C OS=Homo sapiens GN=CST3 PE=1 SV=1 - [CYTC_HUMAN]                                                         | 34.93 | 1 | 5 | 5 | 77 | 0.96 | 0.92 | 0.93 | 0.90 | 1.04 | 1.02 | 0.97 | 1.01 | 146  | 15.8  | 8.75 |      |       |      |
| O76096 | Cystatin-F OS=Homo sapiens GN=CST7 PE=1 SV=1 - [CYTF_HUMAN]                                                         | 4.83  | 1 | 1 | 1 | 15 | 1.12 | 1.16 | 1.16 | 1.22 | 0.66 | 0.75 | 0.60 | 0.65 | 145  | 16.4  | 8.48 |      |       |      |
| Q15828 | Cystatin-M OS=Homo sapiens GN=CST6 PE=1 SV=1 - [CYTM_HUMAN]                                                         | 28.19 | 1 | 3 | 3 | 7  |      |      |      |      | 1.37 | 1.53 | 1.20 | 1.33 | 149  | 16.5  | 8.09 |      |       |      |
| P21291 | Cysteine and glycine-rich protein 1 OS=Homo sapiens GN=CSRP1 PE=1 SV=3 - [CSRP1_HUMAN]                              | 16.58 | 1 | 3 | 3 | 12 |      |      |      |      | 1.27 | 1.41 | 1.16 | 1.29 | 193  | 20.6  | 8.57 |      |       |      |

|        |                                                                                                              |       |   |   |   |    |      |      |      |      |      |      |      |      |      |       |       |
|--------|--------------------------------------------------------------------------------------------------------------|-------|---|---|---|----|------|------|------|------|------|------|------|------|------|-------|-------|
| Q9UHD1 | Cysteine and histidine-rich domain-containing protein 1 OS=Homo sapiens GN=CHORDC1 PE=1 SV=2 - [CHRD1_HUMAN] | 4.52  | 1 | 1 | 1 | 1  |      |      |      | 1.00 | 0.96 | 0.82 | 0.79 | 332  | 37.5 | 7.87  |       |
| Q9Y697 | Cysteine desulfurase, mitochondrial OS=Homo sapiens GN=NFS1 PE=1 SV=3 - [NFS1_HUMAN]                         | 3.50  | 1 | 1 | 1 | 4  | 1.01 | 1.07 | 0.98 | 1.06 | 0.87 | 0.78 | 0.87 | 0.77 | 457  | 50.2  | 8.31  |
| Q9Y600 | Cysteine sulfonic acid decarboxylase OS=Homo sapiens GN=CSAD PE=1 SV=2 - [CSAD_HUMAN]                        | 5.68  | 1 | 1 | 1 | 1  |      |      |      |      | 0.71 | 0.75 | 0.89 | 0.94 | 493  | 55.0  | 6.48  |
| Q5VXU3 | Cysteine-rich hydrophobic domain 1 protein OS=Homo sapiens GN=CHIC1 PE=2 SV=2 - [CHIC1_HUMAN]                | 5.80  | 1 | 1 | 1 | 1  |      |      |      |      | 0.31 | 0.24 | 0.72 | 0.58 | 224  | 25.6  | 4.51  |
| P16562 | Cysteine-rich secretory protein 2 OS=Homo sapiens GN=CRISP2 PE=1 SV=1 - [CRIS2_HUMAN]                        | 4.53  | 1 | 1 | 1 | 1  |      |      |      |      | 0.59 | 0.69 | 0.70 | 0.81 | 243  | 27.2  | 6.49  |
| P54108 | Cysteine-rich secretory protein 3 OS=Homo sapiens GN=CRISP3 PE=1 SV=1 - [CRIS3_HUMAN]                        | 13.06 | 1 | 3 | 3 | 15 | 0.95 | 1.15 | 0.98 | 1.19 | 1.09 | 1.02 | 1.11 | 1.11 | 245  | 27.6  | 7.80  |
| Q96HD1 | Cysteine-rich with EGF-like domain protein 1 OS=Homo sapiens GN=CRELD1 PE=1 SV=3 - [CREL1_HUMAN]             | 4.05  | 1 | 1 | 1 | 3  | 1.27 | 1.04 | 1.31 | 1.08 | 1.79 | 1.62 | 2.11 | 1.90 | 420  | 45.4  | 4.87  |
| Q8WYN3 | Cysteine/serine-rich nuclear protein 3 OS=Homo sapiens GN=CSRNP3 PE=1 SV=1 - [CSRNP3_HUMAN]                  | 1.54  | 1 | 1 | 1 | 5  |      |      |      |      | 1.22 | 0.02 | 0.86 | 0.03 | 585  | 64.9  | 4.75  |
| P13569 | Cystic fibrosis transmembrane conductance regulator OS=Homo sapiens GN=CFTR PE=1 SV=3 - [CFTR_HUMAN]         | 0.88  | 1 | 1 | 1 | 2  | 4.65 |      | 1.06 |      |      |      |      |      | 1480 | 168.0 | 8.73  |
| Q53TN4 | Cytochrome b reductase 1 OS=Homo sapiens GN=CYBRD1 PE=1 SV=1 - [CYBR1_HUMAN]                                 | 4.20  | 1 | 1 | 1 | 1  | 0.09 | 0.47 | 1.94 | #### |      |      |      |      | 286  | 31.6  | 8.76  |
| P07919 | Cytochrome b-c1 complex subunit 6, mitochondrial OS=Homo sapiens GN=UQCRH PE=1 SV=2 - [QCR6_HUMAN]           | 8.79  | 1 | 1 | 1 | 1  |      |      |      |      | 1.62 | 1.37 | 1.68 | 1.41 | 91   | 10.7  | 4.44  |
| P14927 | Cytochrome b-c1 complex subunit 7 OS=Homo sapiens GN=UQCRB PE=1 SV=2 - [QCR7_HUMAN]                          | 6.31  | 1 | 1 | 1 | 9  | 1.02 | 1.49 | 1.06 | 1.57 |      |      |      |      | 111  | 13.5  | 8.78  |
| P99999 | Cytochrome c OS=Homo sapiens GN=CYCS PE=1 SV=2 - [CYC_HUMAN]                                                 | 10.48 | 1 | 1 | 1 | 5  | 0.56 | 0.54 | 0.55 | 0.54 | 0.67 | 0.63 | 0.72 | 0.68 | 105  | 11.7  | 9.57  |
| P15954 | Cytochrome c oxidase subunit 7C, mitochondrial OS=Homo sapiens GN=COX7C PE=1 SV=1 - [COX7C_HUMAN]            | 9.52  | 1 | 1 | 1 | 2  |      |      |      |      | 0.47 | 1.50 | 0.68 | 2.15 | 63   | 7.2   | 10.27 |
| P05177 | Cytochrome P450 1A2 OS=Homo sapiens GN=CYP1A2 PE=1 SV=3 - [CP1A2_HUMAN]                                      | 6.80  | 1 | 1 | 1 | 1  | 0.89 | 1.33 | 0.71 | 1.06 |      |      |      |      | 515  | 58.3  | 9.06  |
| Q9NR63 | Cytochrome P450 26B1 OS=Homo sapiens GN=CYP26B1 PE=2 SV=1 - [CP26B_HUMAN]                                    | 4.49  | 1 | 1 | 1 | 1  |      |      |      |      | 1.36 | 0.04 | 2.02 | 0.07 | 512  | 57.5  | 8.46  |
| P33261 | Cytochrome P450 2C19 OS=Homo sapiens GN=CYP2C19 PE=1 SV=3 - [CP2CJ_HUMAN]                                    | 3.67  | 1 | 1 | 2 | 2  | 0.86 | 0.91 | 0.78 | 0.83 |      |      |      |      | 490  | 55.9  | 7.39  |
| P11712 | Cytochrome P450 2C9 OS=Homo sapiens GN=CYP2C9 PE=1 SV=3 - [CP2C9_HUMAN]                                      | 5.71  | 1 | 2 | 2 | 10 | 1.61 | 1.21 | 2.01 | 1.51 | 1.19 | 0.92 | 0.97 | 0.80 | 490  | 55.6  | 7.91  |
| P51589 | Cytochrome P450 2J2 OS=Homo sapiens GN=CYP2J2 PE=1 SV=2 - [CP2J2_HUMAN]                                      | 1.39  | 1 | 1 | 1 | 2  |      |      |      |      | 0.53 | 0.04 | 1.09 | 0.07 | 502  | 57.6  | 8.60  |
| Q7Z449 | Cytochrome P450 2U1 OS=Homo sapiens GN=CYP2U1 PE=1 SV=1 - [CP2U1_HUMAN]                                      | 5.15  | 1 | 1 | 1 | 9  | 1.16 | 1.00 | 1.26 | 1.00 |      |      |      |      | 544  | 61.9  | 8.40  |
| P08684 | Cytochrome P450 3A4 OS=Homo sapiens GN=CYP3A4 PE=1 SV=4 - [CP3A4_HUMAN]                                      | 2.78  | 2 | 1 | 1 | 16 |      |      |      |      | 0.92 | 0.93 | 1.05 | 1.03 | 503  | 57.3  | 8.10  |
| P20815 | Cytochrome P450 3A5 OS=Homo sapiens GN=CYP3A5 PE=1 SV=1 - [CP3A5_HUMAN]                                      | 3.19  | 1 | 1 | 1 | 1  | 0.86 | 1.05 | 0.92 | 1.14 |      |      |      |      | 502  | 57.1  | 8.75  |
| Q9HC73 | Cytokine receptor-like factor 2 OS=Homo sapiens GN=CRLF2 PE=1 SV=1 - [CRLF2_HUMAN]                           | 9.97  | 1 | 2 | 2 | 3  | 0.86 | 0.97 | 0.98 | 1.12 |      |      |      |      | 371  | 42.0  | 5.25  |
| P21399 | Cytoplasmic aconitase hydratase OS=Homo sapiens GN=ACO1 PE=1 SV=3 - [ACOC_HUMAN]                             | 3.71  | 1 | 2 | 2 | 3  | 0.98 | 0.15 | 0.93 | 0.23 |      |      |      |      | 889  | 98.3  | 6.68  |
| Q14204 | Cytoplasmic dynein 1 heavy chain 1 OS=Homo sapiens GN=DYNC1H1 PE=1 SV=5 - [DYHC1_HUMAN]                      | 3.27  | 1 | 7 | 8 | 14 | 1.18 | 1.12 | 1.23 | 1.32 | 0.63 | 0.85 | 0.91 | 1.47 | 4646 | 532.1 | 6.40  |
| O14576 | Cytoplasmic dynein 1 intermediate chain 1 OS=Homo sapiens GN=DYNC1I1 PE=1 SV=2 - [DC1I1_HUMAN]               | 3.72  | 1 | 1 | 1 | 1  | 1.22 | 1.31 | 0.94 | 1.01 |      |      |      |      | 645  | 72.9  | 5.12  |
| Q13409 | Cytoplasmic dynein 1 intermediate chain 2 OS=Homo sapiens GN=DYNC1I2 PE=1 SV=3 - [DC1I2_HUMAN]               | 5.17  | 1 | 1 | 1 | 2  |      |      |      |      | 1.25 | 1.10 | 1.06 | 0.93 | 638  | 71.4  | 5.20  |



|        |                                                                                                             |       |   |   |   |   |      |      |      |      |      |      |      |      |      |       |       |
|--------|-------------------------------------------------------------------------------------------------------------|-------|---|---|---|---|------|------|------|------|------|------|------|------|------|-------|-------|
| Q8NCM8 | Cytoplasmic dynein 2 heavy chain 1 OS=Homo sapiens<br>GN=DYNC2H1 PE=1 SV=4 - [DYHC2_HUMAN]                  | 1.11  | 1 | 3 | 3 | 3 | 0.91 | 0.83 | 1.02 | 0.94 | 1.01 | 1.00 | 0.98 | 0.97 | 4307 | 492.3 | 6.54  |
| Q8TCX1 | Cytoplasmic dynein 2 light intermediate chain 1 OS=Homo sapiens<br>GN=DYNC2L1 PE=2 SV=1 - [DC2L1_HUMAN]     | 13.39 | 1 | 2 | 2 | 8 |      |      |      |      | 1.15 | 0.86 | 1.10 | 0.90 | 351  | 39.6  | 7.53  |
| Q7L576 | Cytoplasmic FMR1-interacting protein 1 OS=Homo sapiens<br>GN=CYFIP1 PE=1 SV=1 - [CYFP1_HUMAN]               | 1.04  | 2 | 1 | 1 | 1 | 1.29 | 1.38 | 1.28 | 1.37 |      |      |      |      | 1253 | 145.1 | 6.90  |
| Q8NE35 | Cytoplasmic polyadenylation element-binding protein 3 OS=Homo sapiens<br>GN=CPEB3 PE=1 SV=2 - [CPEB3_HUMAN] | 5.87  | 3 | 2 | 2 | 2 | 1.29 | 1.17 | 1.14 | 1.04 |      |      |      |      | 698  | 76.0  | 7.03  |
| P16333 | Cytoplasmic protein NCK1 OS=Homo sapiens<br>GN=NCK1 PE=1 SV=1 - [NCK1_HUMAN]                                | 15.92 | 1 | 3 | 4 | 5 |      |      |      |      | 1.26 | 1.28 | 1.27 | 1.29 | 377  | 42.8  | 6.47  |
| O43639 | Cytoplasmic protein NCK2 OS=Homo sapiens<br>GN=NCK2 PE=1 SV=2 - [NCK2_HUMAN]                                | 7.89  | 1 | 2 | 3 | 8 |      |      |      |      | 1.50 | 1.37 | 1.39 | 1.27 | 380  | 42.9  | 6.95  |
| Q14008 | Cytoskeleton-associated protein 5 OS=Homo sapiens<br>GN=CKAP5 PE=1 SV=3 - [CKAP5_HUMAN]                     | 3.54  | 1 | 4 | 4 | 8 | 0.92 | 1.19 | 0.77 | 1.01 | 2.31 | 3.03 | 2.03 | 2.57 | 2032 | 225.4 | 7.80  |
| O00154 | Cytosolic acyl coenzyme A thioester hydrolase OS=Homo sapiens<br>GN=ACOT7 PE=1 SV=3 - [BACH_HUMAN]          | 2.37  | 1 | 2 | 2 | 3 | 0.69 | 0.69 | 0.74 | 0.74 | 0.84 | 0.91 | 0.69 | 0.75 | 380  | 41.8  | 8.54  |
| Q6ZUV0 | Cytosolic acyl coenzyme A thioester hydrolase-like OS=Homo sapiens<br>GN=ACOT7L PE=1 SV=1 - [BACHL_HUMAN]   | 7.54  | 1 | 1 | 1 | 1 |      |      |      |      | 0.90 | 0.80 | 1.46 | 1.29 | 252  | 28.1  | 7.15  |
| Q9H227 | Cytosolic beta-glucosidase OS=Homo sapiens<br>GN=GBA3 PE=1 SV=2 - [GBA3_HUMAN]                              | 1.71  | 1 | 1 | 1 | 1 |      |      |      |      | 1.30 | 0.89 | 0.89 | 0.61 | 469  | 53.7  | 5.63  |
| Q9UPW5 | Cytosolic carboxypeptidase 1 OS=Homo sapiens<br>GN=AGTPBP1 PE=1 SV=3 - [CBPC1_HUMAN]                        | 1.22  | 1 | 1 | 1 | 1 |      |      |      |      | 2.41 | 1.05 | 3.14 | 1.37 | 1226 | 138.4 | 6.15  |
| Q5U5Z8 | Cytosolic carboxypeptidase 2 OS=Homo sapiens<br>GN=AGBL2 PE=2 SV=2 - [CBPC2_HUMAN]                          | 4.66  | 1 | 2 | 3 | 9 |      |      |      |      | 0.80 | 0.90 | 0.92 | 1.04 | 902  | 104.1 | 9.00  |
| Q8NEM8 | Cytosolic carboxypeptidase 3 OS=Homo sapiens<br>GN=AGBL3 PE=2 SV=2 - [CBPC3_HUMAN]                          | 2.80  | 1 | 2 | 2 | 4 | 1.14 | 1.24 | 1.14 | 1.24 | 0.81 | 0.67 | 0.58 | 0.36 | 1001 | 115.9 | 8.79  |
| Q96M19 | Cytosolic carboxypeptidase 4 OS=Homo sapiens<br>GN=AGBL1 PE=2 SV=2 - [CBPC4_HUMAN]                          | 1.22  | 1 | 1 | 1 | 2 |      |      |      |      | 0.64 | 0.68 | 0.71 | 0.76 | 1066 | 120.2 | 7.24  |
| Q86XP0 | Cytosolic phospholipase A2 delta OS=Homo sapiens<br>GN=PLA2G4D PE=2 SV=2 - [PA24D_HUMAN]                    | 5.13  | 1 | 3 | 3 | 3 |      | 0.54 |      | 0.73 | 0.87 | 0.35 | 0.70 | 0.28 | 818  | 91.9  | 5.50  |
| Q3MJ16 | Cytosolic phospholipase A2 epsilon OS=Homo sapiens<br>GN=PLA2G4E PE=1 SV=3 - [PA24E_HUMAN]                  | 3.15  | 1 | 2 | 2 | 2 | 1.30 | 1.10 | 1.37 | 1.17 |      |      |      |      | 856  | 97.5  | 5.95  |
| P47712 | Cytosolic phospholipase A2 OS=Homo sapiens<br>GN=PLA2G4A PE=1 SV=2 - [PA24A_HUMAN]                          | 1.87  | 1 | 1 | 1 | 1 | 0.39 | 0.29 | 1.30 | 0.97 |      |      |      |      | 749  | 85.2  | 5.38  |
| Q69YQ0 | Cytospin-A OS=Homo sapiens<br>GN=SPECC1L PE=1 SV=2 - [CYTSA_HUMAN]                                          | 1.52  | 1 | 1 | 1 | 1 | 0.36 | 0.38 | 0.41 | 0.43 |      |      |      |      | 1117 | 124.5 | 5.72  |
| Q5M775 | Cytospin-B OS=Homo sapiens<br>GN=SPECC1 PE=1 SV=1 - [CYTSB_HUMAN]                                           | 2.06  | 1 | 2 | 2 | 4 |      |      |      |      | 2.39 | 1.97 | 2.18 | 1.80 | 1068 | 118.5 | 6.70  |
| O95727 | Cytotoxic and regulatory T-cell molecule OS=Homo sapiens<br>GN=CRTAM PE=1 SV=2 - [CRTAM_HUMAN]              | 2.29  | 1 | 1 | 1 | 2 |      |      |      |      | 0.74 | 0.83 | 0.84 | 0.94 | 393  | 44.6  | 6.84  |
| P30046 | D-dopachrome decarboxylase OS=Homo sapiens<br>GN=DDT PE=1 SV=3 - [DOPD_HUMAN]                               | 16.10 | 1 | 2 | 2 | 3 |      |      |      |      | 1.63 | 1.58 | 1.19 | 1.15 | 118  | 12.7  | 7.30  |
| Q8TEA8 | D-tyrosyl-tRNA(Tyr) deacylase 1 OS=Homo sapiens<br>GN=DTD1 PE=1 SV=2 - [DTD1_HUMAN]                         | 7.66  | 1 | 1 | 1 | 3 |      |      |      |      | 1.23 | 1.33 | 0.93 | 0.99 | 209  | 23.4  | 8.24  |
| Q5D0E6 | DALR anticodon-binding domain-containing protein 3 OS=Homo sapiens<br>GN=DALRD3 PE=2 SV=2 - [DALD3_HUMAN]   | 4.24  | 4 | 1 | 2 | 3 | 0.74 | 0.62 | 0.88 | 0.74 |      |      |      |      | 543  | 59.3  | 7.42  |
| Q5SW24 | Dapper homolog 2 OS=Homo sapiens<br>GN=DACT2 PE=2 SV=1 - [DACT2_HUMAN]                                      | 5.56  | 1 | 2 | 2 | 3 |      |      |      |      | 0.59 | 1.89 | 4.47 | 1.10 | 774  | 82.6  | 8.87  |
| Q96B18 | Dapper homolog 3 OS=Homo sapiens<br>GN=DACT3 PE=2 SV=2 - [DACT3_HUMAN]                                      | 1.59  | 1 | 1 | 1 | 1 |      |      |      |      | 1.56 | 1.20 | 1.68 | 1.29 | 629  | 64.9  | 10.36 |
| Q9HCK1 | DBF4-type zinc finger-containing protein 2 OS=Homo sapiens<br>GN=ZDBF2 PE=1 SV=3 - [ZDBF2_HUMAN]            | 1.66  | 1 | 1 | 2 | 4 |      | 0.84 |      | 0.92 |      |      |      |      | 2354 | 265.5 | 6.16  |
| Q5T1A1 | DC-STAMP domain-containing protein 2 OS=Homo sapiens<br>GN=DCST2 PE=2 SV=2 - [DCST2_HUMAN]                  | 2.33  | 1 | 1 | 1 | 1 | 1.77 | 1.89 | 1.42 | 1.54 |      |      |      |      | 773  | 86.2  | 8.16  |

|        |                                                                                                                |       |   |   |   |    |      |      |      |      |      |      |      |      |      |       |      |
|--------|----------------------------------------------------------------------------------------------------------------|-------|---|---|---|----|------|------|------|------|------|------|------|------|------|-------|------|
| Q9UKG1 | DCC-interacting protein 13-alpha OS=Homo sapiens<br>GN=APPL1 PE=1 SV=1 - [DP13A_HUMAN]                         | 4.51  | 2 | 2 | 2 | 4  | 0.85 | 0.86 | 1.06 | 1.08 | 1.21 | 1.37 | 1.18 | 1.34 | 709  | 79.6  | 5.41 |
| Q8IWE4 | DCN1-like protein 3 OS=Homo sapiens GN=DCUN1D3 PE=2<br>SV=1 - [DCNL3_HUMAN]                                    | 5.26  | 1 | 1 | 1 | 2  |      |      |      |      | 1.57 | 2.38 | 1.50 | 2.28 | 304  | 34.3  | 5.12 |
| Q9H773 | dCTP pyrophosphatase 1 OS=Homo sapiens GN=DCTPP1<br>PE=1 SV=1 - [DCTP1_HUMAN]                                  | 11.76 | 1 | 1 | 1 | 2  | 1.32 | 1.35 | 1.11 | 1.14 | 0.53 | 0.80 | 0.87 | 1.32 | 170  | 18.7  | 5.03 |
| Q8TEB1 | DDB1- and CUL4-associated factor 11 OS=Homo sapiens<br>GN=DCAF11 PE=1 SV=1 - [DCA11_HUMAN]                     | 3.66  | 1 | 1 | 2 | 2  |      |      |      |      | 0.90 | 0.78 | 0.73 | 0.63 | 546  | 61.6  | 6.40 |
| Q5VU92 | DDB1- and CUL4-associated factor 12-like protein 1<br>OS=Homo sapiens GN=DCAF12L1 PE=2 SV=1 -<br>[DC121_HUMAN] | 6.05  | 1 | 1 | 1 | 1  | 0.03 | 0.03 | 0.04 | 0.04 |      |      |      |      | 463  | 51.2  | 8.56 |
| Q66K64 | DDB1- and CUL4-associated factor 15 OS=Homo sapiens<br>GN=DCAF15 PE=1 SV=1 - [DCA15_HUMAN]                     | 1.33  | 1 | 1 | 1 | 1  | 1.11 | 1.19 | 1.05 | 1.13 |      |      |      |      | 600  | 66.4  | 6.58 |
| Q8WV16 | DDB1- and CUL4-associated factor 4 OS=Homo sapiens<br>GN=DCAF4 PE=1 SV=3 - [DCAF4_HUMAN]                       | 2.63  | 1 | 1 | 1 | 1  | 1.93 | 1.92 | 2.03 | 2.02 |      |      |      |      | 495  | 55.7  | 9.23 |
| Q96JK2 | DDB1- and CUL4-associated factor 5 OS=Homo sapiens<br>GN=DCAF5 PE=1 SV=2 - [DCAF5_HUMAN]                       | 1.80  | 1 | 1 | 1 | 3  | 0.83 | 0.92 | 0.77 | 0.86 |      |      |      |      | 942  | 103.9 | 5.76 |
| Q58WW2 | DDB1- and CUL4-associated factor 6 OS=Homo sapiens<br>GN=DCAF6 PE=1 SV=1 - [DCAF6_HUMAN]                       | 1.40  | 1 | 1 | 1 | 1  |      |      |      |      | 0.78 | 0.71 | 0.86 | 0.78 | 860  | 96.2  | 5.27 |
| Q9UER7 | Death domain-associated protein 6 OS=Homo sapiens<br>GN=DAXX PE=1 SV=2 - [DAXX_HUMAN]                          | 3.24  | 1 | 1 | 1 | 1  | 0.75 | 0.65 | 0.84 | 0.73 |      |      |      |      | 740  | 81.3  | 4.87 |
| Q9BTC0 | Death-inducer obliterator 1 OS=Homo sapiens GN=DIDO1<br>PE=1 SV=5 - [DIDO1_HUMAN]                              | 0.67  | 1 | 1 | 1 | 2  | 0.86 | 1.78 | 1.09 | 2.24 | 0.70 | 0.82 | 0.64 | 0.75 | 2240 | 243.7 | 7.88 |
| P07585 | Decorin OS=Homo sapiens GN=DCN PE=1 SV=1 -<br>[PGS2_HUMAN]                                                     | 4.18  | 1 | 1 | 1 | 3  | 1.23 | 1.45 | 1.22 | 1.45 |      |      |      |      | 359  | 39.7  | 8.54 |
| Q5JSL3 | Dedicator of cytokinesis protein 11 OS=Homo sapiens<br>GN=DOCK11 PE=1 SV=2 - [DOC11_HUMAN]                     | 0.48  | 1 | 1 | 1 | 4  |      |      |      |      | 0.46 | 0.03 | 0.72 | 0.04 | 2073 | 237.5 | 7.74 |
| Q92608 | Dedicator of cytokinesis protein 2 OS=Homo sapiens<br>GN=DOCK2 PE=1 SV=2 - [DOCK2_HUMAN]                       | 3.55  | 1 | 3 | 4 | 6  | 1.15 | 1.09 | 1.20 | 1.15 | 1.27 | 1.02 | 1.39 | 1.06 | 1830 | 211.8 | 6.87 |
| Q8IZD9 | Dedicator of cytokinesis protein 3 OS=Homo sapiens<br>GN=DOCK3 PE=1 SV=1 - [DOCK3_HUMAN]                       | 0.99  | 1 | 1 | 1 | 1  | 1.59 | 1.23 | 1.71 | 1.33 |      |      |      |      | 2030 | 233.0 | 6.98 |
| Q8N110 | Dedicator of cytokinesis protein 4 OS=Homo sapiens<br>GN=DOCK4 PE=1 SV=3 - [DOCK4_HUMAN]                       | 0.97  | 1 | 1 | 1 | 1  | 0.97 | 1.03 | 0.85 | 0.91 |      |      |      |      | 1966 | 225.1 | 7.65 |
| Q9H7D0 | Dedicator of cytokinesis protein 5 OS=Homo sapiens<br>GN=DOCK5 PE=1 SV=3 - [DOCK5_HUMAN]                       | 2.25  | 1 | 2 | 3 | 16 | 1.21 | 1.26 | 1.32 | 1.39 |      |      |      |      | 1870 | 215.2 | 7.96 |
| Q96HP0 | Dedicator of cytokinesis protein 6 OS=Homo sapiens<br>GN=DOCK6 PE=1 SV=3 - [DOCK6_HUMAN]                       | 1.47  | 1 | 1 | 1 | 1  |      |      |      |      | 0.89 |      | 1.78 |      | 2047 | 229.4 | 6.74 |
| Q8NF50 | Dedicator of cytokinesis protein 8 OS=Homo sapiens<br>GN=DOCK8 PE=1 SV=3 - [DOCK8_HUMAN]                       | 1.62  | 1 | 2 | 2 | 6  | 1.02 | 1.21 | 0.90 | 1.07 | 0.85 | 0.86 | 0.78 | 0.78 | 2099 | 238.4 | 6.87 |
| Q9BZ29 | Dedicator of cytokinesis protein 9 OS=Homo sapiens<br>GN=DOCK9 PE=1 SV=2 - [DOCK9_HUMAN]                       | 2.13  | 1 | 3 | 3 | 4  | 1.16 | 0.83 | 0.99 | 0.72 |      |      |      |      | 2069 | 236.3 | 7.49 |
| Q01524 | Defensin-6 OS=Homo sapiens GN=DEFA6 PE=1 SV=1 -<br>[DEF6_HUMAN]                                                | 14.00 | 1 | 1 | 1 | 2  | 1.31 | 1.48 | 1.38 | 1.56 |      |      |      |      | 100  | 11.0  | 5.38 |
| Q96LJ7 | Dehydrogenase/reductase SDR family member 1 OS=Homo<br>sapiens GN=DHRS1 PE=1 SV=1 - [DHRS1_HUMAN]              | 6.71  | 1 | 1 | 1 | 2  | 1.25 | 0.67 | 1.88 | 1.01 |      |      |      |      | 313  | 33.9  | 7.83 |
| Q6IAN0 | Dehydrogenase/reductase SDR family member 7B OS=Homo<br>sapiens GN=DHRS7B PE=1 SV=2 - [DRS7B_HUMAN]            | 4.00  | 1 | 1 | 1 | 1  | 0.82 | 0.54 | 0.79 | 0.53 |      |      |      |      | 325  | 35.1  | 9.55 |
| Q9UGM3 | Deleted in malignant brain tumors 1 protein OS=Homo sapiens<br>GN=DMBT1 PE=1 SV=2 - [DMBT1_HUMAN]              | 7.83  | 1 | 3 | 3 | 3  | 0.86 | 0.64 | 0.73 | 0.54 | 1.11 | 1.08 | 0.88 | 0.86 | 2413 | 260.6 | 5.44 |
| A4D2P6 | Delphinin OS=Homo sapiens GN=GRID2IP PE=2 SV=2 -<br>[GRD2I_HUMAN]                                              | 2.56  | 1 | 1 | 1 | 1  | 1.64 | 1.77 | 1.58 | 1.73 |      |      |      |      | 1211 | 132.2 | 7.40 |
| P13716 | Delta-aminolevulinic acid dehydratase OS=Homo sapiens<br>GN=ALAD PE=1 SV=1 - [HEM2_HUMAN]                      | 13.33 | 1 | 3 | 3 | 5  | 0.59 | 0.68 | 0.57 | 0.67 |      |      |      |      | 330  | 36.3  | 6.79 |
| O00548 | Delta-like protein 1 OS=Homo sapiens GN=DLL1 PE=2 SV=2 -<br>[DLL1_HUMAN]                                       | 1.24  | 1 | 1 | 1 | 1  |      |      |      |      | 0.73 | 0.10 | 1.06 | 0.14 | 723  | 78.0  | 6.24 |

|        |                                                                                                                 |       |   |   |   |    |      |      |      |      |      |      |      |      |      |       |       |
|--------|-----------------------------------------------------------------------------------------------------------------|-------|---|---|---|----|------|------|------|------|------|------|------|------|------|-------|-------|
| P41143 | Delta-type opioid receptor OS=Homo sapiens GN=OPRD1 PE=1 SV=4 - [OPRD_HUMAN]                                    | 4.84  | 1 | 2 | 2 | 11 | 2.87 | 1.89 | 0.94 | 0.71 | 1.11 | 0.88 | 1.11 | 0.92 | 372  | 40.3  | 8.92  |
| Q08495 | Dermin OS=Homo sapiens GN=EPB49 PE=1 SV=3 - [DEMA_HUMAN]                                                        | 6.17  | 1 | 2 | 2 | 7  |      |      |      |      | 1.20 | 1.37 | 1.36 | 1.53 | 405  | 45.5  | 8.88  |
| O94850 | Dendrin OS=Homo sapiens GN=DDN PE=1 SV=3 - [DEND_HUMAN]                                                         | 3.66  | 1 | 1 | 1 | 1  | 1.33 | 1.69 | 1.33 | 1.70 |      |      |      |      | 711  | 75.9  | 10.17 |
| Q8TEH3 | DENN domain-containing protein 1A OS=Homo sapiens GN=DENND1A PE=1 SV=2 - [DEN1A_HUMAN]                          | 3.17  | 1 | 2 | 2 | 10 | 3.53 | 2.50 | 1.95 | 1.52 | 0.99 | 1.01 | 0.92 | 0.97 | 1009 | 110.5 | 6.96  |
| Q5VZ89 | DENN domain-containing protein 4C OS=Homo sapiens GN=DENND4C PE=1 SV=2 - [DEN4C_HUMAN]                          | 1.14  | 1 | 1 | 1 | 1  | 0.94 | 0.95 | 0.92 | 0.94 |      |      |      |      | 1673 | 186.7 | 6.86  |
| Q6IQ26 | DENN domain-containing protein 5A OS=Homo sapiens GN=DENND5A PE=1 SV=2 - [DEN5A_HUMAN]                          | 2.10  | 2 | 1 | 2 | 4  | 1.25 | 1.16 | 1.17 | 1.09 |      |      |      |      | 1287 | 147.0 | 6.65  |
| Q13316 | Dentin matrix acidic phosphoprotein 1 OS=Homo sapiens GN=DMP1 PE=1 SV=2 - [DMP1_HUMAN]                          | 1.95  | 1 | 1 | 1 | 1  | 1.50 | 1.11 | 1.25 | 0.92 |      |      |      |      | 513  | 55.7  | 4.15  |
| Q8IXL6 | Dentin matrix protein 4 OS=Homo sapiens GN=FAM20C PE=1 SV=2 - [DMP4_HUMAN]                                      | 12.67 | 1 | 5 | 5 | 8  | 1.02 | 1.00 | 1.20 | 1.16 | 0.89 | 0.34 | 1.05 | 0.40 | 584  | 66.2  | 7.74  |
| P27707 | Deoxycytidine kinase OS=Homo sapiens GN=DCK PE=1 SV=1 - [DCK_HUMAN]                                             | 3.08  | 1 | 1 | 1 | 2  | 0.29 |      | 0.62 |      |      |      |      |      | 260  | 30.5  | 5.21  |
| Q16854 | Deoxyguanosine kinase, mitochondrial OS=Homo sapiens GN=DGUOK PE=1 SV=2 - [DGUOK_HUMAN]                         | 6.50  | 1 | 1 | 1 | 1  | 0.79 | 0.58 | 0.87 | 0.65 |      |      |      |      | 277  | 32.0  | 8.66  |
| P49366 | Deoxyhypusine synthase OS=Homo sapiens GN=DHPS PE=1 SV=1 - [DHYS_HUMAN]                                         | 5.96  | 1 | 1 | 1 | 1  |      |      |      |      | 0.52 | 1.56 | 0.63 | 1.90 | 369  | 40.9  | 5.36  |
| Q9H147 | Deoxynucleotidyltransferase terminal-interacting protein 1 OS=Homo sapiens GN=DNTTIP1 PE=1 SV=2 - [TDIF1_HUMAN] | 13.37 | 1 | 3 | 3 | 7  | 1.40 | 1.67 | 1.18 | 1.41 | 0.79 | 0.33 | 1.14 | 0.27 | 329  | 37.0  | 8.97  |
| Q8TB45 | DEP domain-containing mTOR-interacting protein OS=Homo sapiens GN=DEPTOR PE=1 SV=2 - [DPTOR_HUMAN]              | 2.20  | 1 | 1 | 1 | 1  | 1.41 | 1.37 | 1.11 | 1.09 |      |      |      |      | 409  | 46.3  | 8.07  |
| Q5TB30 | DEP domain-containing protein 1A OS=Homo sapiens GN=DEPDC1 PE=1 SV=2 - [DEP1A_HUMAN]                            | 1.36  | 1 | 1 | 1 | 1  |      |      |      |      |      | 0.79 |      |      | 811  | 92.9  | 8.68  |
| Q8WUY9 | DEP domain-containing protein 1B OS=Homo sapiens GN=DEPDC1B PE=2 SV=2 - [DEP1B_HUMAN]                           | 2.84  | 1 | 1 | 1 | 1  |      |      |      |      | 0.63 | 0.60 | 0.82 | 0.78 | 529  | 61.7  | 8.85  |
| O75140 | DEP domain-containing protein 5 OS=Homo sapiens GN=DEPDC5 PE=2 SV=1 - [DEPD5_HUMAN]                             | 0.38  | 1 | 1 | 1 | 3  |      |      |      |      | 1.02 | 0.92 | 0.97 | 0.88 | 1572 | 177.8 | 6.73  |
| Q8WVC6 | Dephospho-CoA kinase domain-containing protein OS=Homo sapiens GN=DCAKD PE=1 SV=1 - [DCAKD_HUMAN]               | 8.23  | 1 | 1 | 1 | 1  | 0.95 | 1.00 | 0.99 | 1.05 |      |      |      |      | 231  | 26.5  | 9.58  |
| Q96Q80 | Derlin-3 OS=Homo sapiens GN=DERL3 PE=1 SV=2 - [DERL3_HUMAN]                                                     | 3.83  | 1 | 1 | 1 | 3  | 2.97 | 4.16 | 2.73 | 3.87 |      |      |      |      | 235  | 26.7  | 8.48  |
| Q9UL01 | Dermatan-sulfate epimerase OS=Homo sapiens GN=DSE PE=1 SV=1 - [DSE_HUMAN]                                       | 4.18  | 1 | 2 | 2 | 4  |      |      |      |      | 1.27 | 1.31 | 1.06 | 1.08 | 958  | 109.7 | 8.09  |
| Q07507 | Dermatopontin OS=Homo sapiens GN=DPT PE=2 SV=2 - [DERM_HUMAN]                                                   | 13.93 | 1 | 2 | 2 | 4  |      |      |      |      | 0.68 | 0.92 | 0.71 | 0.97 | 201  | 24.0  | 4.82  |
| P81605 | Dermcidin OS=Homo sapiens GN=DCD PE=1 SV=2 - [DCD_HUMAN]                                                        | 38.18 | 1 | 5 | 6 | 33 | 0.85 | 0.74 | 1.25 | 0.97 | 1.62 | 1.48 | 1.68 | 1.53 | 110  | 11.3  | 6.54  |
| Q6E0U4 | Dermokine OS=Homo sapiens GN=DMKN PE=1 SV=3 - [DMKN_HUMAN]                                                      | 4.83  | 1 | 2 | 2 | 2  | 0.63 | 0.81 | 0.64 | 0.84 |      |      |      |      | 476  | 47.1  | 7.28  |
| Q08554 | Desmocollin-1 OS=Homo sapiens GN=DSC1 PE=1 SV=2 - [DSC1_HUMAN]                                                  | 8.28  | 1 | 5 | 5 | 10 | 1.32 | 1.21 | 1.30 | 1.20 | 1.20 | 1.20 | 1.10 | 1.11 | 894  | 99.9  | 5.43  |
| Q14574 | Desmocollin-3 OS=Homo sapiens GN=DSC3 PE=1 SV=3 - [DSC3_HUMAN]                                                  | 2.46  | 1 | 3 | 3 | 5  |      |      |      |      | 1.09 | 1.36 | 1.25 | 1.17 | 896  | 99.9  | 6.10  |
| Q02413 | Desmoglein-1 OS=Homo sapiens GN=DSG1 PE=1 SV=2 - [DSG1_HUMAN]                                                   | 5.53  | 1 | 3 | 3 | 3  | 0.69 | 0.78 | 0.74 | 0.85 | 0.91 | 1.06 | 2.46 | 2.70 | 1049 | 113.7 | 5.03  |
| Q14126 | Desmoglein-2 OS=Homo sapiens GN=DSG2 PE=1 SV=2 - [DSG2_HUMAN]                                                   | 7.51  | 1 | 7 | 7 | 16 | 1.04 | 0.98 | 1.10 | 1.02 | 1.04 | 0.94 | 0.95 | 0.87 | 1118 | 122.2 | 5.24  |
| P15924 | Desmoplakin OS=Homo sapiens GN=DSP PE=1 SV=3 - [DESP_HUMAN]                                                     | 1.22  | 1 | 3 | 3 | 10 | 0.92 | 0.74 | 0.64 | 0.52 | 0.95 | 0.79 | 1.10 | 1.25 | 2871 | 331.6 | 6.81  |

|        |                                                                                                        |       |   |   |   |    |      |      |      |      |      |      |      |      |      |       |      |      |      |       |      |      |      |
|--------|--------------------------------------------------------------------------------------------------------|-------|---|---|---|----|------|------|------|------|------|------|------|------|------|-------|------|------|------|-------|------|------|------|
| P60981 | Dextrin OS=Homo sapiens GN=DSTN PE=1 SV=3 - [DEST_HUMAN]                                               | 16.36 | 1 | 2 | 3 | 5  |      |      |      |      |      |      |      |      | 0.62 | 0.61  | 1.03 | 0.81 | 165  | 18.5  | 7.85 |      |      |
| Q01459 | Di-N-acetylchitobiase OS=Homo sapiens GN=CTBS PE=1 SV=1 - [DIAC_HUMAN]                                 | 17.92 | 1 | 6 | 6 | 15 | 1.40 | 1.27 | 1.46 | 1.29 | 1.10 | 1.15 | 0.95 | 1.14 | 385  | 43.7  | 6.64 |      |      |       |      |      |      |
| Q16760 | Diacylglycerol kinase delta OS=Homo sapiens GN=DGKD PE=1 SV=4 - [DGKD_HUMAN]                           | 1.15  | 1 | 1 | 1 | 2  | 1.23 | 1.21 | 1.47 | 1.47 | 1.00 | 0.93 | 1.10 | 1.02 | 1214 | 134.4 | 7.56 |      |      |       |      |      |      |
| Q86XP1 | Diacylglycerol kinase eta OS=Homo sapiens GN=DGKH PE=1 SV=1 - [DGKH_HUMAN]                             | 0.90  | 1 | 1 | 1 | 1  |      |      |      |      |      |      |      |      | 0.91 | 0.27  | 1.04 | 0.31 | 1220 | 134.8 | 6.54 |      |      |
| O75912 | Diacylglycerol kinase iota OS=Homo sapiens GN=DGKI PE=1 SV=1 - [DGKI_HUMAN]                            | 1.50  | 1 | 1 | 1 | 1  | 1.20 | 1.31 | 1.10 | 1.21 |      |      |      |      |      |       |      |      | 1065 | 116.9 | 7.77 |      |      |
| Q5KSL6 | Diacylglycerol kinase kappa OS=Homo sapiens GN=DGKK PE=1 SV=1 - [DGKK_HUMAN]                           | 1.10  | 1 | 2 | 2 | 3  | 0.16 | 0.07 | 0.15 | 0.07 |      |      |      |      |      |       |      |      | 1271 | 141.7 | 5.53 |      |      |
| Q13574 | Diacylglycerol kinase zeta OS=Homo sapiens GN=DGKZ PE=1 SV=3 - [DGKZ_HUMAN]                            | 1.34  | 1 | 1 | 1 | 2  |      |      |      |      |      |      |      |      | 0.84 | 0.46  | 0.96 | 0.53 | 1117 | 124.1 | 9.04 |      |      |
| Q6ZPD8 | Diacylglycerol O-acyltransferase 2-like protein 6 OS=Homo sapiens GN=DGAT2L6 PE=2 SV=1 - [DG2L6_HUMAN] | 4.15  | 1 | 1 | 1 | 2  |      |      |      |      |      |      |      |      | 1.46 | 1.34  | 1.18 | 1.08 | 337  | 38.6  | 9.86 |      |      |
| P21673 | Diamine acetyltransferase 1 OS=Homo sapiens GN=SAT1 PE=1 SV=1 - [SAT1_HUMAN]                           | 2.92  | 1 | 1 | 1 | 1  | 0.72 | 1.17 | 0.62 | 1.02 |      |      |      |      |      |       |      |      | 171  | 20.0  | 5.16 |      |      |
| Q9UBP4 | Dickkopf-related protein 3 OS=Homo sapiens GN=DKK3 PE=1 SV=2 - [DKK3_HUMAN]                            | 9.43  | 1 | 2 | 2 | 4  | 0.95 | 0.81 | 0.92 | 0.80 |      |      |      |      |      |       |      |      | 350  | 38.4  | 4.65 |      |      |
| Q68CQ4 | Digestive organ expansion factor homolog OS=Homo sapiens GN=DIEXF PE=1 SV=2 - [DIEXF_HUMAN]            | 6.88  | 1 | 3 | 4 | 9  | 0.68 | 0.85 | 0.84 | 1.10 |      |      |      |      |      |       |      |      | 756  | 87.0  | 5.88 |      |      |
| Q14195 | Dihydropyrimidinase-related protein 3 OS=Homo sapiens GN=DPYSL3 PE=1 SV=1 - [DPYL3_HUMAN]              | 2.28  | 1 | 1 | 1 | 1  | 0.91 | 0.99 | 0.92 | 1.02 |      |      |      |      |      |       |      |      | 570  | 61.9  | 6.49 |      |      |
| Q12882 | Dihydropyrimidine dehydrogenase [NADP(+)] OS=Homo sapiens GN=DPYD PE=1 SV=2 - [DPYD_HUMAN]             | 0.98  | 1 | 1 | 1 | 2  | 0.86 | 0.72 | 0.92 | 0.76 | 0.80 | 0.82 | 0.83 | 0.85 | 1025 | 111.3 | 7.05 |      |      |       |      |      |      |
| O15228 | Dihydroxyacetone phosphate acyltransferase OS=Homo sapiens GN=GNPAT PE=1 SV=1 - [GNPAT_HUMAN]          | 7.65  | 1 | 3 | 3 | 3  | 1.07 | 1.23 | 1.06 | 1.24 | 0.88 | 1.00 | 0.83 | 0.94 | 680  | 77.1  | 6.57 |      |      |       |      |      |      |
| P31512 | Dimethylaniline monooxygenase [N-oxide-forming] 4 OS=Homo sapiens GN=FMO4 PE=2 SV=3 - [FMO4_HUMAN]     | 3.41  | 1 | 1 | 1 | 1  |      |      |      |      |      |      |      |      | 0.45 | 0.45  | 0.46 | 0.47 | 558  | 63.3  | 8.46 |      |      |
| Q9UI17 | Dimethylglycine dehydrogenase, mitochondrial OS=Homo sapiens GN=DMGDH PE=1 SV=2 - [M2GD_HUMAN]         | 1.27  | 1 | 1 | 1 | 1  | 1.34 | 1.41 | 1.20 | 1.28 |      |      |      |      |      |       |      |      | 866  | 96.7  | 7.62 |      |      |
| Q9H4A9 | Dipeptidase 2 OS=Homo sapiens GN=DPEP2 PE=1 SV=2 - [DPEP2_HUMAN]                                       | 13.58 | 1 | 5 | 5 | 31 | 1.02 | 1.01 | 1.10 | 1.05 | 1.23 | 1.28 | 1.38 | 1.34 | 486  | 53.3  | 6.40 |      |      |       |      |      |      |
| P53634 | Dipeptidyl peptidase 1 OS=Homo sapiens GN=CTSC PE=1 SV=2 - [CATC_HUMAN]                                | 2.59  | 1 | 1 | 1 | 8  | 0.82 | 0.91 | 0.75 | 0.85 | 1.05 | 1.01 | 1.16 | 1.15 | 463  | 51.8  | 6.99 |      |      |       |      |      |      |
| Q9UHL4 | Dipeptidyl peptidase 2 OS=Homo sapiens GN=DPP7 PE=1 SV=3 - [DPP2_HUMAN]                                | 4.07  | 1 | 1 | 1 | 2  | 1.02 | 0.96 | 1.18 | 1.03 |      |      |      |      |      |       |      |      | 492  | 54.3  | 6.32 |      |      |
| Q9NY33 | Dipeptidyl peptidase 3 OS=Homo sapiens GN=DPP3 PE=1 SV=2 - [DPP3_HUMAN]                                | 3.26  | 1 | 2 | 2 | 2  | 0.98 | 0.85 | 0.97 | 0.85 |      |      |      |      |      |       |      |      | 737  | 82.5  | 5.10 |      |      |
| P27487 | Dipeptidyl peptidase 4 OS=Homo sapiens GN=DPP4 PE=1 SV=2 - [DPP4_HUMAN]                                | 2.87  | 1 | 3 | 3 | 6  | 0.87 | 0.93 | 0.89 | 0.96 | 1.27 | 0.76 | 1.53 | 0.80 | 766  | 88.2  | 6.04 |      |      |       |      |      |      |
| O95989 | Diphosphoinositol polyphosphate phosphohydrolase 1 OS=Homo sapiens GN=NUDT3 PE=1 SV=1 - [NUDT3_HUMAN]  | 8.14  | 1 | 1 | 1 | 3  |      |      |      |      |      |      |      |      | 1.17 | 1.08  | 1.21 | 1.11 | 172  | 19.5  | 6.34 |      |      |
| Q9BZG8 | Diphthamide biosynthesis protein 1 OS=Homo sapiens GN=DPH1 PE=1 SV=2 - [DPH1_HUMAN]                    | 1.35  | 1 | 1 | 1 | 1  | 1.13 | 1.13 | 0.91 | 0.93 |      |      |      |      |      |       |      |      | 443  | 48.8  | 8.18 |      |      |
| P98082 | Disabled homolog 2 OS=Homo sapiens GN=DAB2 PE=1 SV=3 - [DAB2_HUMAN]                                    | 4.03  | 1 | 2 | 2 | 2  |      |      |      |      |      |      |      |      |      |       |      |      | 1.19 | 0.76  | 770  | 82.4 | 5.53 |
| Q9P265 | Disco-interacting protein 2 homolog B OS=Homo sapiens GN=DIP2B PE=1 SV=3 - [DIP2B_HUMAN]               | 1.02  | 1 | 1 | 1 | 1  | 1.42 | 1.18 | 1.25 | 1.04 |      |      |      |      |      |       |      |      | 1576 | 171.4 | 8.09 |      |      |
| Q16832 | Discoidin domain-containing receptor 2 OS=Homo sapiens GN=DDR2 PE=1 SV=2 - [DDR2_HUMAN]                | 2.69  | 1 | 1 | 1 | 5  | 0.97 | 0.92 | 1.05 | 1.00 | 1.39 | 1.42 | 1.32 | 1.35 | 855  | 96.7  | 5.36 |      |      |       |      |      |      |
| Q9Y4D1 | Disheveled-associated activator of morphogenesis 1 OS=Homo sapiens GN=DAAM1 PE=1 SV=2 - [DAAM1_HUMAN]  | 0.83  | 1 | 1 | 1 | 2  | 0.89 | 0.81 | 0.91 | 0.84 |      |      |      |      |      |       |      |      | 1078 | 123.4 | 7.23 |      |      |

|        |                                                                                                                    |       |   |   |   |    |      |      |      |      |      |      |      |      |      |       |       |      |      |      |  |
|--------|--------------------------------------------------------------------------------------------------------------------|-------|---|---|---|----|------|------|------|------|------|------|------|------|------|-------|-------|------|------|------|--|
| O14672 | Disintegrin and metalloproteinase domain-containing protein 10 OS=Homo sapiens GN=ADAM10 PE=1 SV=1 - [ADA10_HUMAN] | 1.47  | 1 | 1 | 1 | 6  | 0.78 | 0.83 | 0.76 | 0.88 |      |      |      |      |      |       |       | 748  | 84.1 | 7.77 |  |
| O43184 | Disintegrin and metalloproteinase domain-containing protein 12 OS=Homo sapiens GN=ADAM12 PE=1 SV=3 - [ADA12_HUMAN] | 12.54 | 1 | 9 | 9 | 27 | 3.05 | 3.48 | 3.25 | 3.61 | 5.92 | 5.81 | 5.36 | 5.68 | 909  | 99.5  | 8.40  |      |      |      |  |
| Q9Y3Q7 | Disintegrin and metalloproteinase domain-containing protein 18 OS=Homo sapiens GN=ADAM18 PE=2 SV=1 - [ADA18_HUMAN] | 2.17  | 1 | 1 | 1 | 1  |      |      |      |      | 0.94 | 0.79 | 0.88 | 0.74 | 739  | 82.8  | 7.28  |      |      |      |  |
| Q13443 | Disintegrin and metalloproteinase domain-containing protein 9 OS=Homo sapiens GN=ADAM9 PE=1 SV=1 - [ADAM9_HUMAN]   | 3.66  | 1 | 2 | 2 | 20 | 0.69 | 0.60 | 0.70 | 0.61 | 1.20 | 0.68 | 1.22 | 1.18 | 819  | 90.5  | 7.52  |      |      |      |  |
| Q15700 | Disks large homolog 2 OS=Homo sapiens GN=DLG2 PE=1 SV=3 - [DLG2_HUMAN]                                             | 1.38  | 1 | 1 | 1 | 1  | 1.51 | 1.25 | 1.69 | 1.41 |      |      |      |      | 870  | 97.5  | 6.47  |      |      |      |  |
| P78352 | Disks large homolog 4 OS=Homo sapiens GN=DLG4 PE=1 SV=3 - [DLG4_HUMAN]                                             | 2.21  | 1 | 1 | 1 | 70 | 1.19 | 1.06 | 1.19 | 1.08 | 1.06 | 0.91 | 1.03 | 0.89 | 724  | 80.4  | 5.88  |      |      |      |  |
| Q8TDM6 | Disks large homolog 5 OS=Homo sapiens GN=DLG5 PE=1 SV=4 - [DLG5_HUMAN]                                             | 0.57  | 1 | 1 | 1 | 3  | 0.72 | 0.86 | 0.74 | 0.68 |      |      |      |      | 1919 | 213.7 | 7.42  |      |      |      |  |
| O14490 | Disks large-associated protein 1 OS=Homo sapiens GN=DLGAP1 PE=1 SV=1 - [DLGP1_HUMAN]                               | 1.54  | 1 | 1 | 1 | 3  | 0.94 | 0.64 | 1.14 | 0.78 | 2.49 | 3.43 | 1.99 | 2.74 | 977  | 108.8 | 7.08  |      |      |      |  |
| O95886 | Disks large-associated protein 3 OS=Homo sapiens GN=DLGAP3 PE=1 SV=3 - [DLGP3_HUMAN]                               | 1.63  | 1 | 1 | 1 | 1  |      |      |      |      | 0.98 | 0.92 | 1.07 | 1.00 | 979  | 106.0 | 8.76  |      |      |      |  |
| Q9Y2H0 | Disks large-associated protein 4 OS=Homo sapiens GN=DLGAP4 PE=1 SV=3 - [DLGP4_HUMAN]                               | 0.81  | 1 | 1 | 1 | 2  |      |      |      |      | 2.33 | 2.33 | 1.87 | 1.86 | 992  | 107.9 | 7.08  |      |      |      |  |
| Q969H9 | Disrupted in renal carcinoma protein 1 OS=Homo sapiens GN=DIRC1 PE=2 SV=1 - [DIRC1_HUMAN]                          | 7.69  | 1 | 1 | 1 | 2  |      |      |      |      | 0.51 | 0.92 | 0.65 | 0.99 | 104  | 11.4  | 8.37  |      |      |      |  |
| Q96SL1 | Disrupted in renal carcinoma protein 2 OS=Homo sapiens GN=DIRC2 PE=2 SV=1 - [DIRC2_HUMAN]                          | 6.90  | 1 | 1 | 1 | 2  | 0.72 | 0.69 | 0.75 | 0.72 |      |      |      |      | 478  | 52.1  | 8.47  |      |      |      |  |
| Q9Y485 | DmX-like protein 1 OS=Homo sapiens GN=DMXL1 PE=1 SV=3 - [DMXL1_HUMAN]                                              | 3.50  | 1 | 5 | 5 | 7  | 1.01 | 1.22 | 0.86 | 1.05 | 0.94 | 0.81 | 0.82 | 0.70 | 3027 | 337.6 | 6.34  |      |      |      |  |
| Q8TDJ6 | DmX-like protein 2 OS=Homo sapiens GN=DMXL2 PE=1 SV=2 - [DMXL2_HUMAN]                                              | 1.22  | 1 | 2 | 3 | 27 | 0.82 | 1.15 | 0.59 | 0.84 |      |      |      |      | 3036 | 339.4 | 6.38  |      |      |      |  |
| P26358 | DNA (cytosine-5)-methyltransferase 1 OS=Homo sapiens GN=DNMT1 PE=1 SV=2 - [DNMT1_HUMAN]                            | 1.05  | 1 | 1 | 1 | 1  | 0.58 | 0.35 | 0.66 | 0.41 |      |      |      |      | 1616 | 183.0 | 7.75  |      |      |      |  |
| Q6PJP8 | DNA cross-link repair 1A protein OS=Homo sapiens GN=DCLRE1A PE=1 SV=3 - [DCR1A_HUMAN]                              | 1.63  | 1 | 2 | 2 | 2  | 1.31 | 1.37 | 1.82 | 1.92 | 1.26 | 1.44 | 0.71 | 0.81 | 1040 | 116.3 | 7.97  |      |      |      |  |
| Q6NTF7 | DNA dC->dU-editing enzyme APOBEC-3H OS=Homo sapiens GN=APOBEC3H PE=1 SV=3 - [ABC3H_HUMAN]                          | 7.00  | 1 | 1 | 1 | 1  |      |      |      |      | 0.39 | 0.28 | 0.72 | 0.52 | 200  | 23.5  | 8.73  |      |      |      |  |
| Q99708 | DNA endonuclease RBBP8 OS=Homo sapiens GN=RBBP8 PE=1 SV=2 - [COM1_HUMAN]                                           | 0.89  | 1 | 1 | 1 | 3  | 0.92 | 1.00 | 0.88 | 0.97 |      |      |      |      | 897  | 101.9 | 6.30  |      |      |      |  |
| Q2NKX8 | DNA excision repair protein ERCC-6-like OS=Homo sapiens GN=ERCC6L PE=1 SV=1 - [ERC6L_HUMAN]                        | 3.36  | 1 | 2 | 3 | 3  | 0.62 | 0.17 | 0.88 | 0.24 | 2.20 | 1.95 | 2.46 | 2.18 | 1250 | 141.0 | 5.31  |      |      |      |  |
| O00273 | DNA fragmentation factor subunit alpha OS=Homo sapiens GN=DFFA PE=1 SV=1 - [DFFA_HUMAN]                            | 16.31 | 1 | 4 | 4 | 8  |      |      |      |      | 1.08 | 1.19 | 1.16 | 1.04 | 331  | 36.5  | 4.79  |      |      |      |  |
| Q8NG08 | DNA helicase B OS=Homo sapiens GN=HELB PE=1 SV=2 - [HELB_HUMAN]                                                    | 1.10  | 1 | 1 | 1 | 1  |      |      |      |      | 4.79 | 3.32 | 4.47 | 3.10 | 1087 | 123.2 | 5.87  |      |      |      |  |
| P40692 | DNA mismatch repair protein Mlh1 OS=Homo sapiens GN=MLH1 PE=1 SV=1 - [MLH1_HUMAN]                                  | 1.32  | 1 | 1 | 1 | 1  | 2.02 | 2.43 | 1.98 | 2.39 |      |      |      |      | 756  | 84.5  | 5.72  |      |      |      |  |
| Q9UHC1 | DNA mismatch repair protein Mlh3 OS=Homo sapiens GN=MLH3 PE=1 SV=3 - [MLH3_HUMAN]                                  | 2.41  | 1 | 2 | 2 | 7  | 0.58 |      |      |      | 1.41 | 1.04 | 1.03 | 1.04 | 1.01 | 1453  | 163.6 | 6.73 |      |      |  |
| P43246 | DNA mismatch repair protein Msh2 OS=Homo sapiens GN=MSH2 PE=1 SV=1 - [MSH2_HUMAN]                                  | 3.53  | 1 | 2 | 2 | 4  |      |      |      |      | 1.36 | 0.85 | 1.14 | 0.71 | 934  | 104.7 | 5.77  |      |      |      |  |
| P20585 | DNA mismatch repair protein Msh3 OS=Homo sapiens GN=MSH3 PE=1 SV=4 - [MSH3_HUMAN]                                  | 1.50  | 1 | 1 | 1 | 1  |      |      |      |      | 1.19 | 1.13 | 1.10 | 1.05 | 1137 | 127.3 | 8.02  |      |      |      |  |
| P52701 | DNA mismatch repair protein Msh6 OS=Homo sapiens GN=MSH6 PE=1 SV=2 - [MSH6_HUMAN]                                  | 1.32  | 1 | 1 | 1 | 2  |      |      |      |      | 0.86 | 0.81 | 0.92 | 0.87 | 1360 | 152.7 | 6.90  |      |      |      |  |
| P04053 | DNA nucleotidyltransferase OS=Homo sapiens GN=DNTT PE=1 SV=3 - [TDT_HUMAN]                                         | 2.95  | 1 | 1 | 1 | 2  |      |      |      |      | 1.06 | 1.30 | 0.92 | 1.12 | 509  | 58.5  | 8.43  |      |      |      |  |

|        |                                                                                                           |       |   |   |   |    |      |      |      |      |      |      |      |      |  |  |      |       |       |
|--------|-----------------------------------------------------------------------------------------------------------|-------|---|---|---|----|------|------|------|------|------|------|------|------|--|--|------|-------|-------|
| Q9Y253 | DNA polymerase eta OS=Homo sapiens GN=POLH PE=1 SV=1 - [POLH_HUMAN]                                       | 1.96  | 1 | 1 | 1 | 1  | 1.16 | 1.12 | 1.06 | 1.03 |      |      |      |      |  |  | 713  | 78.4  | 8.44  |
| Q9UNA4 | DNA polymerase iota OS=Homo sapiens GN=POLI PE=1 SV=3 - [POLI_HUMAN]                                      | 1.62  | 1 | 1 | 1 | 1  |      |      |      |      | 0.36 | 0.30 | 0.47 | 0.40 |  |  | 740  | 83.0  | 6.07  |
| Q9UGP5 | DNA polymerase lambda OS=Homo sapiens GN=POLL PE=1 SV=1 - [DPOLL_HUMAN]                                   | 4.17  | 1 | 2 | 2 | 3  | 1.24 | 1.14 | 1.36 | 1.25 | 0.80 | 0.68 | 0.59 | 0.50 |  |  | 575  | 63.4  | 7.87  |
| Q9UHN1 | DNA polymerase subunit gamma-2, mitochondrial OS=Homo sapiens GN=POLG2 PE=1 SV=1 - [DPOG2_HUMAN]          | 6.60  | 1 | 2 | 2 | 2  |      |      |      |      | 1.66 | 1.53 | 1.62 | 1.49 |  |  | 485  | 54.9  | 8.35  |
| O75417 | DNA polymerase theta OS=Homo sapiens GN=POLQ PE=1 SV=2 - [DPOLQ_HUMAN]                                    | 5.10  | 1 | 7 | 7 | 13 | 1.01 | 1.39 | 0.99 | 1.34 | 0.91 | 1.13 | 0.76 | 0.94 |  |  | 2590 | 289.4 | 7.36  |
| O60673 | DNA polymerase zeta catalytic subunit OS=Homo sapiens GN=REV3L PE=1 SV=2 - [DPOLZ_HUMAN]                  | 2.30  | 1 | 4 | 4 | 13 | 0.15 | 0.31 | 0.52 | 1.11 | 0.94 | 0.81 | 0.93 | 0.80 |  |  | 3130 | 352.6 | 8.47  |
| Q9Y620 | DNA repair and recombination protein RAD54B OS=Homo sapiens GN=RAD54B PE=1 SV=1 - [RA54B_HUMAN]           | 3.41  | 1 | 2 | 2 | 9  | 1.26 | 1.55 | 1.29 | 1.49 | 1.05 | 1.08 | 1.03 | 1.06 |  |  | 910  | 102.9 | 8.12  |
| Q92889 | DNA repair endonuclease XPF OS=Homo sapiens GN=ERCC4 PE=1 SV=3 - [XPF_HUMAN]                              | 1.97  | 1 | 1 | 1 | 2  |      |      |      |      |      | 1.12 | 0.11 |      |  |  | 916  | 104.4 | 6.93  |
| Q92878 | DNA repair protein RAD50 OS=Homo sapiens GN=RAD50 PE=1 SV=1 - [RAD50_HUMAN]                               | 1.98  | 7 | 1 | 2 | 2  | 1.38 | 1.26 | 1.49 | 1.36 |      |      |      |      |  |  | 1312 | 153.8 | 6.89  |
| O43502 | DNA repair protein RAD51 homolog 3 OS=Homo sapiens GN=RAD51C PE=1 SV=1 - [RA51C_HUMAN]                    | 4.52  | 1 | 1 | 1 | 1  |      |      |      |      | 0.88 | 0.74 | 0.87 | 0.73 |  |  | 376  | 42.2  | 6.74  |
| O75771 | DNA repair protein RAD51 homolog 4 OS=Homo sapiens GN=RAD51D PE=1 SV=1 - [RA51D_HUMAN]                    | 4.88  | 1 | 1 | 1 | 10 | 0.97 | 0.97 | 0.98 | 0.98 | 1.22 | 1.33 | 1.18 | 1.29 |  |  | 328  | 35.0  | 6.25  |
| Q1ZZU3 | DNA repair protein SWI5 homolog OS=Homo sapiens GN=SWI5 PE=1 SV=1 - [SWI5_HUMAN]                          | 11.49 | 4 | 1 | 2 | 3  | 0.39 | 0.19 | 0.68 | 0.33 |      |      |      |      |  |  | 235  | 26.7  | 10.24 |
| O43542 | DNA repair protein XRCC3 OS=Homo sapiens GN=XRCC3 PE=1 SV=1 - [XRCC3_HUMAN]                               | 9.83  | 1 | 1 | 1 | 1  |      |      |      |      | 1.25 | 1.91 |      |      |  |  | 346  | 37.8  | 8.48  |
| Q9Y248 | DNA replication complex GINS protein PSF2 OS=Homo sapiens GN=GINS2 PE=1 SV=1 - [PSF2_HUMAN]               | 6.49  | 1 | 1 | 1 | 1  | 1.00 | 1.20 | 0.87 | 1.04 |      |      |      |      |  |  | 185  | 21.4  | 5.44  |
| Q9H211 | DNA replication factor Cdt1 OS=Homo sapiens GN=CDT1 PE=1 SV=3 - [CDT1_HUMAN]                              | 3.48  | 1 | 1 | 1 | 1  | 1.60 | 1.25 | 1.40 | 1.10 |      |      |      |      |  |  | 546  | 60.4  | 9.77  |
| P49736 | DNA replication licensing factor MCM2 OS=Homo sapiens GN=MCM2 PE=1 SV=4 - [MCM2_HUMAN]                    | 5.86  | 1 | 4 | 4 | 6  | 1.06 | 0.95 | 1.03 | 0.93 | 0.75 | 0.96 | 0.77 | 1.00 |  |  | 904  | 101.8 | 5.52  |
| P33992 | DNA replication licensing factor MCM5 OS=Homo sapiens GN=MCM5 PE=1 SV=5 - [MCM5_HUMAN]                    | 6.13  | 1 | 2 | 2 | 4  | 2.27 | 5.82 | 2.17 | 6.41 |      |      |      |      |  |  | 734  | 82.2  | 8.37  |
| Q14566 | DNA replication licensing factor MCM6 OS=Homo sapiens GN=MCM6 PE=1 SV=1 - [MCM6_HUMAN]                    | 1.46  | 1 | 1 | 1 | 1  | 1.05 | 1.11 | 1.18 | 1.24 |      |      |      |      |  |  | 821  | 92.8  | 5.41  |
| Q9NXL9 | DNA replication licensing factor MCM9 OS=Homo sapiens GN=MCM9 PE=1 SV=4 - [MCM9_HUMAN]                    | 0.87  | 1 | 1 | 1 | 1  | 0.21 | 0.19 | 0.19 | 0.18 |      |      |      |      |  |  | 1143 | 127.2 | 7.74  |
| Q02880 | DNA topoisomerase 2-beta OS=Homo sapiens GN=TOP2B PE=1 SV=3 - [TOP2B_HUMAN]                               | 1.78  | 1 | 1 | 2 | 6  | 1.09 | 1.26 | 1.13 | 1.32 |      |      |      |      |  |  | 1626 | 183.2 | 8.00  |
| Q92547 | DNA topoisomerase 2-binding protein 1 OS=Homo sapiens GN=TOPBP1 PE=1 SV=3 - [TOPB1_HUMAN]                 | 1.58  | 1 | 2 | 2 | 2  | 1.07 | 1.09 | 1.18 | 1.20 |      |      |      |      |  |  | 1522 | 170.6 | 6.96  |
| P29372 | DNA-3-methyladenine glycosylase OS=Homo sapiens GN=MPG PE=1 SV=3 - [3MG_HUMAN]                            | 3.36  | 1 | 1 | 1 | 1  |      |      |      |      | 1.11 | 1.01 | 0.94 | 0.86 |  |  | 298  | 32.8  | 9.57  |
| Q8WXF8 | DNA-binding death effector domain-containing protein 2 OS=Homo sapiens GN=DEDD2 PE=1 SV=1 - [DEDD2_HUMAN] | 3.99  | 1 | 1 | 1 | 1  |      |      |      |      | #### | ###  | ###  | #### |  |  | 326  | 36.2  | 8.97  |
| P16989 | DNA-binding protein A OS=Homo sapiens GN=CSDA PE=1 SV=4 - [DBPA_HUMAN]                                    | 3.49  | 1 | 1 | 1 | 1  |      |      |      |      | 0.90 | 0.76 | 0.76 | 0.64 |  |  | 372  | 40.1  | 9.77  |
| Q2KHR2 | DNA-binding protein RFX7 OS=Homo sapiens GN=RFX7 PE=1 SV=1 - [RFX7_HUMAN]                                 | 1.10  | 1 | 1 | 1 | 1  | 1.47 | 1.53 | 1.48 | 1.55 |      |      |      |      |  |  | 1363 | 146.8 | 6.76  |
| O14593 | DNA-binding protein RFXANK OS=Homo sapiens GN=RFXANK PE=1 SV=2 - [RFXK_HUMAN]                             | 5.38  | 1 | 1 | 1 | 1  | 0.84 | 0.89 | 0.95 | 1.01 |      |      |      |      |  |  | 260  | 28.1  | 4.55  |
| P78527 | DNA-dependent protein kinase catalytic subunit OS=Homo sapiens GN=PRKDC PE=1 SV=3 - [PRKDC_HUMAN]         | 1.79  | 1 | 3 | 4 | 5  |      |      |      |      | 0.39 | 0.43 | 0.30 | 0.34 |  |  | 4128 | 468.8 | 7.12  |

|        |                                                                                                                                 |       |   |    |    |    |      |      |      |      |      |      |      |      |      |       |       |       |  |
|--------|---------------------------------------------------------------------------------------------------------------------------------|-------|---|----|----|----|------|------|------|------|------|------|------|------|------|-------|-------|-------|--|
| O95602 | DNA-directed RNA polymerase I subunit RPA1 OS=Homo sapiens GN=POLR1A PE=1 SV=2 - [RPA1_HUMAN]                                   | 3.02  | 1 | 3  | 3  | 4  |      |      |      |      |      | 1.16 | 1.09 | 1.12 | 1.08 | 1720  | 194.7 | 7.03  |  |
| O15446 | DNA-directed RNA polymerase I subunit RPA34 OS=Homo sapiens GN=CD3EAP PE=1 SV=1 - [RPA34_HUMAN]                                 | 1.37  | 1 | 1  | 1  | 1  |      |      |      |      |      | 0.62 | 0.13 | 0.63 | 0.13 | 510   | 55.0  | 8.51  |  |
| P24928 | DNA-directed RNA polymerase II subunit RPB1 OS=Homo sapiens GN=POLR2A PE=1 SV=2 - [RPB1_HUMAN]                                  | 2.59  | 1 | 3  | 3  | 4  | 0.83 | 0.84 | 0.81 | 0.83 | #### | 5.17 | ###  | 5.49 | 1970 | 217.0 | 7.37  |       |  |
| P30876 | DNA-directed RNA polymerase II subunit RPB2 OS=Homo sapiens GN=POLR2B PE=1 SV=1 - [RPB2_HUMAN]                                  | 1.28  | 1 | 2  | 2  | 2  |      |      |      |      |      | 1.32 | 1.30 | 1.28 | 1.25 | 1174  | 133.8 | 6.87  |  |
| P62487 | DNA-directed RNA polymerase II subunit RPB7 OS=Homo sapiens GN=POLR2G PE=1 SV=1 - [RPB7_HUMAN]                                  | 11.05 | 1 | 1  | 1  | 1  |      |      |      |      |      | 0.48 | 0.18 | 1.04 | 0.40 | 172   | 19.3  | 5.54  |  |
| O14802 | DNA-directed RNA polymerase III subunit RPC1 OS=Homo sapiens GN=POLR3A PE=1 SV=2 - [RPC1_HUMAN]                                 | 1.80  | 1 | 2  | 2  | 2  |      |      |      |      |      | 0.89 | 0.67 | 0.93 | 0.71 | 1390  | 155.5 | 8.48  |  |
| P31689 | DnaJ homolog subfamily A member 1 OS=Homo sapiens GN=DNAJA1 PE=1 SV=2 - [DNAJA1_HUMAN]                                          | 4.79  | 1 | 1  | 1  | 2  | 1.05 | 0.95 | 1.55 | 1.40 |      |      |      |      |      | 397   | 44.8  | 7.08  |  |
| O60884 | DnaJ homolog subfamily A member 2 OS=Homo sapiens GN=DNAJA2 PE=1 SV=1 - [DNAJA2_HUMAN]                                          | 9.71  | 1 | 2  | 2  | 2  | 2.25 | 1.98 | 1.03 | 0.91 |      |      |      |      |      | 412   | 45.7  | 6.48  |  |
| Q9UBS4 | DnaJ homolog subfamily B member 11 OS=Homo sapiens GN=DNAJB11 PE=1 SV=1 - [DJB11_HUMAN]                                         | 9.22  | 1 | 2  | 3  | 6  | 1.08 | 1.01 | 1.06 | 1.00 | 0.99 | 0.97 | 1.09 | 1.07 | 358  | 40.5  | 6.18  |       |  |
| P59910 | DnaJ homolog subfamily B member 13 OS=Homo sapiens GN=DNAJB13 PE=2 SV=1 - [DJB13_HUMAN]                                         | 3.16  | 1 | 2  | 2  | 2  | 0.72 | 0.63 | 0.94 | 0.83 | 0.77 | 0.75 | 1.01 | 0.98 | 316  | 36.1  | 7.87  |       |  |
| Q8TBM8 | DnaJ homolog subfamily B member 14 OS=Homo sapiens GN=DNAJB14 PE=2 SV=1 - [DJB14_HUMAN]                                         | 2.64  | 1 | 1  | 1  | 1  |      |      |      |      | #### | ###  | 1.55 | 1.65 | 379  | 42.5  | 8.59  |       |  |
| O75165 | DnaJ homolog subfamily C member 13 OS=Homo sapiens GN=DNAJC13 PE=1 SV=5 - [DJC13_HUMAN]                                         | 0.62  | 1 | 1  | 1  | 1  |      |      |      |      |      | 0.94 | 1.02 | 0.98 | 1.07 | 2243  | 254.3 | 6.74  |  |
| Q9NVM6 | DnaJ homolog subfamily C member 17 OS=Homo sapiens GN=DNAJC17 PE=1 SV=1 - [DJC17_HUMAN]                                         | 7.24  | 1 | 2  | 2  | 3  |      |      |      |      |      | 0.81 | 0.91 | 0.79 | 0.84 | 304   | 34.7  | 8.53  |  |
| Q99543 | DnaJ homolog subfamily C member 2 OS=Homo sapiens GN=DNAJC2 PE=1 SV=4 - [DNJC2_HUMAN]                                           | 2.58  | 1 | 1  | 1  | 1  |      |      |      |      |      | 1.12 | 1.15 | 2.01 | 2.07 | 621   | 72.0  | 8.70  |  |
| Q9NNZ3 | DnaJ homolog subfamily C member 4 OS=Homo sapiens GN=DNAJC4 PE=2 SV=1 - [DNJC4_HUMAN]                                           | 4.15  | 1 | 1  | 1  | 1  |      |      |      |      |      | 0.89 | 0.93 | 1.02 | 1.06 | 241   | 27.6  | 10.55 |  |
| Q99704 | Docking protein 1 OS=Homo sapiens GN=DOK1 PE=1 SV=1 - [DOK1_HUMAN]                                                              | 4.99  | 1 | 3  | 3  | 4  | 0.81 | 0.86 | 0.70 | 0.75 | 0.71 | 0.44 | 0.63 | 0.38 | 481  | 52.4  | 6.47  |       |  |
| O60496 | Docking protein 2 OS=Homo sapiens GN=DOK2 PE=1 SV=2 - [DOK2_HUMAN]                                                              | 8.01  | 1 | 2  | 2  | 4  | 0.93 | 0.87 | 1.01 | 0.94 | 1.26 | 1.04 | 0.97 | 0.80 | 412  | 45.4  | 6.02  |       |  |
| Q7L591 | Docking protein 3 OS=Homo sapiens GN=DOK3 PE=1 SV=2 - [DOK3_HUMAN]                                                              | 14.11 | 1 | 4  | 4  | 13 | 1.32 | 1.22 | 1.59 | 1.47 | 0.86 | 1.05 | 0.93 | 1.01 | 496  | 53.3  | 7.77  |       |  |
| Q6PKX4 | Docking protein 6 OS=Homo sapiens GN=DOK6 PE=1 SV=1 - [DOK6_HUMAN]                                                              | 3.93  | 1 | 1  | 1  | 2  | 1.13 | 0.97 | 1.07 | 0.92 |      |      |      |      | 331  | 38.3  | 8.48  |       |  |
| Q5BKT4 | Dol-P-Glc:Glc(2)Man(9)GlcNAc(2)-PP-Dol alpha-1,2-glucosyltransferase OS=Homo sapiens GN=ALG10 PE=1 SV=1 - [AG10A_HUMAN]         | 4.65  | 1 | 1  | 1  | 1  |      |      |      |      | 0.91 |      |      |      | 473  | 55.6  | 9.29  |       |  |
| P46977 | Dolichyl-diphosphooligosaccharide--protein glycosyltransferase subunit STT3A OS=Homo sapiens GN=STT3A PE=1 SV=2 - [STT3A_HUMAN] | 3.55  | 1 | 2  | 2  | 3  |      |      |      |      |      | 0.95 | 1.04 | 0.94 | 1.02 | 705   | 80.5  | 8.07  |  |
| P09172 | Dopamine beta-hydroxylase OS=Homo sapiens GN=DBH PE=1 SV=3 - [DOPO_HUMAN]                                                       | 18.80 | 1 | 10 | 10 | 48 | 1.17 | 1.19 | 1.13 | 1.19 | 1.13 | 1.30 | 1.04 | 1.19 | 617  | 69.0  | 6.42  |       |  |
| Q6RFH8 | Double homeobox protein 4C OS=Homo sapiens GN=DUX4L9 PE=1 SV=1 - [DUX4C_HUMAN]                                                  | 2.94  | 4 | 1  | 1  | 1  |      |      |      |      |      | 1.99 | 2.04 | 1.08 | 1.10 | 374   | 39.4  | 11.11 |  |
| Q96PT3 | Double homeobox protein 5 OS=Homo sapiens GN=DUX5 PE=2 SV=1 - [DUX5_HUMAN]                                                      | 13.71 | 1 | 1  | 1  | 1  | 0.87 | 0.65 | 0.97 | 0.72 |      |      |      |      | 197  | 22.2  | 10.65 |       |  |
| O95793 | Double-stranded RNA-binding protein Staufen homolog 1 OS=Homo sapiens GN=STAU1 PE=1 SV=2 - [STAU1_HUMAN]                        | 3.29  | 1 | 1  | 2  | 2  | 1.05 | 1.10 | 1.02 | 1.07 |      |      |      |      | 577  | 63.1  | 9.44  |       |  |
| P55265 | Double-stranded RNA-specific adenosine deaminase OS=Homo sapiens GN=ADAR PE=1 SV=4 - [DSRAD_HUMAN]                              | 3.51  | 1 | 3  | 3  | 3  | 1.53 | 1.27 | 1.65 | 1.37 | 1.01 | 0.97 | 0.91 | 0.87 | 1226 | 136.0 | 8.65  |       |  |
| P78563 | Double-stranded RNA-specific editase 1 OS=Homo sapiens GN=ADARB1 PE=1 SV=1 - [RED1_HUMAN]                                       | 1.21  | 1 | 1  | 1  | 23 | 0.80 | 0.78 | 0.84 | 0.81 | 1.00 | 1.06 | 0.94 | 1.00 | 741  | 80.7  | 9.01  |       |  |

|        |                                                                                                                                  |       |   |   |   |    |      |      |      |      |      |      |      |      |      |       |      |      |      |     |      |       |      |
|--------|----------------------------------------------------------------------------------------------------------------------------------|-------|---|---|---|----|------|------|------|------|------|------|------|------|------|-------|------|------|------|-----|------|-------|------|
| Q9Y5R6 | Doublesex- and mab-3-related transcription factor 1 OS=Homo sapiens GN=DMRT1 PE=1 SV=2 - [DMRT1_HUMAN]                           | 2.95  | 1 | 1 | 1 | 1  |      |      |      |      |      |      |      |      |      | 1.45  | 0.74 | 1.34 | 0.68 | 373 | 39.4 | 7.61  |      |
| Q5VZB9 | Doublesex- and mab-3-related transcription factor A1 OS=Homo sapiens GN=DMRTA1 PE=2 SV=1 - [DMRTA_HUMAN]                         | 2.98  | 1 | 1 | 1 | 1  | 0.71 | 0.73 | 0.77 | 0.79 |      |      |      |      |      |       |      |      |      |     | 504  | 53.1  | 8.90 |
| O60469 | Down syndrome cell adhesion molecule OS=Homo sapiens GN=DSCAM PE=1 SV=2 - [DSCAM_HUMAN]                                          | 1.39  | 1 | 1 | 2 | 32 | 1.17 | 1.01 | 1.10 | 0.96 |      |      |      |      |      |       |      |      |      |     | 2012 | 222.1 | 7.68 |
| Q8TD84 | Down syndrome cell adhesion molecule-like protein 1 OS=Homo sapiens GN=DSCAML1 PE=1 SV=2 - [DSCML1_HUMAN]                        | 1.66  | 1 | 1 | 2 | 32 |      |      |      |      | 1.12 | 1.61 | 0.98 | 1.40 | 2053 | 224.3 | 8.16 |      |      |     |      |       |      |
| P59022 | Down syndrome critical region protein 10 OS=Homo sapiens GN=DSCR10 PE=2 SV=1 - [DSCR10_HUMAN]                                    | 17.24 | 1 | 1 | 1 | 1  |      |      |      |      | 1.17 | 1.15 | 0.67 | 0.66 | 87   | 9.3   | 5.60 |      |      |     |      |       |      |
| P56555 | Down syndrome critical region protein 4 OS=Homo sapiens GN=DSCR4 PE=2 SV=1 - [DSCR4_HUMAN]                                       | 6.78  | 1 | 1 | 1 | 4  |      |      |      |      | 0.84 | 0.74 | 0.91 | 0.92 | 118  | 12.9  | 7.91 |      |      |     |      |       |      |
| Q8NB13 | Draxin OS=Homo sapiens GN=C1orf187 PE=1 SV=2 - [DRAX1_HUMAN]                                                                     | 5.44  | 1 | 1 | 1 | 2  |      |      |      |      | 0.58 | 0.69 | 0.75 | 0.88 | 349  | 38.6  | 7.69 |      |      |     |      |       |      |
| Q16643 | Drebrin OS=Homo sapiens GN=DBN1 PE=1 SV=4 - [DREB_HUMAN]                                                                         | 4.16  | 1 | 2 | 2 | 5  |      |      |      |      | 2.75 | 2.87 | 2.72 | 2.84 | 649  | 71.4  | 4.45 |      |      |     |      |       |      |
| Q9UJU6 | Drebrin-like protein OS=Homo sapiens GN=DBNL PE=1 SV=1 - [DBNL_HUMAN]                                                            | 13.02 | 1 | 4 | 4 | 16 | 1.00 | 0.96 | 1.09 | 1.05 | 1.27 | 1.40 | 1.25 | 1.42 | 430  | 48.2  | 5.05 |      |      |     |      |       |      |
| Q8NBA8 | DTW domain-containing protein 2 OS=Homo sapiens GN=DTWD2 PE=2 SV=1 - [DTWD2_HUMAN]                                               | 11.07 | 1 | 1 | 1 | 1  |      |      |      |      |      |      |      |      | 0.54 | 298   | 33.4 | 8.68 |      |     |      |       |      |
| Q9UN19 | Dual adapter for phosphotyrosine and 3-phosphotyrosine and 3-phosphoinositide OS=Homo sapiens GN=DAPP1 PE=1 SV=1 - [DAPP1_HUMAN] | 4.29  | 1 | 1 | 1 | 4  | 1.37 | 0.93 | 0.87 | 0.60 | 1.00 | 1.05 | 0.86 | 0.90 | 280  | 32.2  | 7.80 |      |      |     |      |       |      |
| Q9NRD9 | Dual oxidase 1 OS=Homo sapiens GN=DUOX1 PE=1 SV=1 - [DUOX1_HUMAN]                                                                | 1.74  | 2 | 2 | 3 | 3  |      |      |      |      | 0.86 | 0.16 | 0.86 | 0.16 | 1551 | 177.1 | 7.90 |      |      |     |      |       |      |
| Q6XUX3 | Dual serine/threonine and tyrosine protein kinase OS=Homo sapiens GN=DSTYK PE=1 SV=2 - [DUSTY_HUMAN]                             | 4.52  | 1 | 3 | 3 | 4  | 1.49 | 1.26 | 1.46 | 1.24 | 0.93 | 0.95 | 1.05 | 1.08 | 929  | 105.1 | 6.74 |      |      |     |      |       |      |
| Q68J44 | Dual specificity phosphatase DUPD1 OS=Homo sapiens GN=DUPD1 PE=1 SV=1 - [DUPD1_HUMAN]                                            | 5.00  | 1 | 1 | 1 | 1  | 1.23 | 1.16 | 1.05 | 1.00 |      |      |      |      | 220  | 25.3  | 6.04 |      |      |     |      |       |      |
| P33981 | Dual specificity protein kinase TTK OS=Homo sapiens GN=TTK PE=1 SV=2 - [TTK_HUMAN]                                               | 5.02  | 2 | 3 | 4 | 8  | 1.25 | 0.92 | 1.48 | 1.07 |      |      |      |      | 857  | 97.0  | 8.16 |      |      |     |      |       |      |
| Q9H596 | Dual specificity protein phosphatase 21 OS=Homo sapiens GN=DUSP21 PE=1 SV=1 - [DUS21_HUMAN]                                      | 3.68  | 1 | 1 | 1 | 1  | 2.63 | 2.68 | 2.56 | 2.63 |      |      |      |      | 190  | 21.5  | 8.82 |      |      |     |      |       |      |
| P51452 | Dual specificity protein phosphatase 3 OS=Homo sapiens GN=DUSP3 PE=1 SV=1 - [DUS3_HUMAN]                                         | 36.22 | 1 | 6 | 6 | 10 | 0.89 | 0.95 | 0.97 | 1.06 | 1.06 | 1.17 | 1.87 | 0.58 | 185  | 20.5  | 7.80 |      |      |     |      |       |      |
| Q15569 | Dual specificity testis-specific protein kinase 1 OS=Homo sapiens GN=TESK1 PE=1 SV=2 - [TESK1_HUMAN]                             | 3.19  | 1 | 1 | 1 | 2  | 1.16 | 1.14 | 1.09 | 1.07 | 1.08 | 1.19 | 1.13 | 1.24 | 626  | 67.6  | 8.10 |      |      |     |      |       |      |
| Q96S53 | Dual specificity testis-specific protein kinase 2 OS=Homo sapiens GN=TESK2 PE=2 SV=1 - [TESK2_HUMAN]                             | 2.63  | 1 | 1 | 1 | 3  | 0.90 | 0.74 | 0.78 | 0.65 | 0.89 | 1.01 | 0.84 | 0.96 | 571  | 63.6  | 7.06 |      |      |     |      |       |      |
| Q9NR20 | Dual specificity tyrosine-phosphorylation-regulated kinase 4 OS=Homo sapiens GN=DYRK4 PE=1 SV=2 - [DYRK4_HUMAN]                  | 1.35  | 1 | 1 | 1 | 5  | 1.02 | 1.19 | 0.82 | 1.33 |      |      |      |      | 520  | 59.6  | 8.90 |      |      |     |      |       |      |
| Q7RTS9 | Dymeclin OS=Homo sapiens GN=DYM PE=1 SV=1 - [DYM_HUMAN]                                                                          | 3.74  | 1 | 2 | 2 | 2  | 1.76 | 2.02 | 1.82 | 2.10 |      |      |      |      | 669  | 75.9  | 5.86 |      |      |     |      |       |      |
| Q14203 | Dynactin subunit 1 OS=Homo sapiens GN=DCTN1 PE=1 SV=3 - [DCTN1_HUMAN]                                                            | 3.29  | 1 | 3 | 3 | 6  | 0.96 | 0.80 | 0.98 | 0.83 | 0.75 | 1.05 | 1.10 | 1.55 | 1278 | 141.6 | 5.81 |      |      |     |      |       |      |
| Q9UJW0 | Dynactin subunit 4 OS=Homo sapiens GN=DCTN4 PE=1 SV=1 - [DCTN4_HUMAN]                                                            | 1.30  | 1 | 1 | 1 | 1  | 1.07 | 0.82 | 1.11 | 0.86 |      |      |      |      | 460  | 52.3  | 7.34 |      |      |     |      |       |      |
| O00429 | Dynamamin-1-like protein OS=Homo sapiens GN=DNM1L PE=1 SV=2 - [DNM1L_HUMAN]                                                      | 7.47  | 1 | 4 | 4 | 7  | 0.84 | 0.80 | 0.73 | 0.71 | 2.45 | 2.27 | 2.29 | 2.13 | 736  | 81.8  | 6.81 |      |      |     |      |       |      |
| Q8NEP3 | Dynein assembly factor 1, axonemal OS=Homo sapiens GN=DNAAF1 PE=1 SV=5 - [DAAF1_HUMAN]                                           | 3.03  | 1 | 1 | 1 | 3  | 0.63 | 0.33 | 0.91 | 0.48 | 0.77 | 0.79 | 0.70 | 0.71 | 725  | 80.0  | 4.67 |      |      |     |      |       |      |
| Q9P2D7 | Dynein heavy chain 1, axonemal OS=Homo sapiens GN=DNAH1 PE=1 SV=4 - [DYH1_HUMAN]                                                 | 1.96  | 1 | 4 | 4 | 6  | 1.05 | 1.06 | 0.92 | 0.95 | 1.29 | 0.25 | 1.04 | 0.22 | 4330 | 493.6 | 5.94 |      |      |     |      |       |      |
| Q8IVF4 | Dynein heavy chain 10, axonemal OS=Homo sapiens GN=DNAH10 PE=1 SV=4 - [DYH10_HUMAN]                                              | 1.12  | 8 | 3 | 5 | 5  | 0.91 | 0.99 | 1.13 | 1.23 | 0.72 | 1.42 | 0.91 | 1.79 | 4471 | 514.5 | 5.88 |      |      |     |      |       |      |



|        |                                                                                                             |       |    |    |    |    |      |      |      |      |      |      |      |       |                 |
|--------|-------------------------------------------------------------------------------------------------------------|-------|----|----|----|----|------|------|------|------|------|------|------|-------|-----------------|
| Q96DT5 | Dynein heavy chain 11, axonemal OS=Homo sapiens<br>GN=DNAH11 PE=1 SV=3 - [DYH11_HUMAN]                      | 0.91  | 8  | 2  | 3  | 4  | 1.02 | 1.03 | 0.91 | 0.92 | 0.98 | 1.31 | 4523 | 520.7 | 6.44            |
| Q0VDD8 | Dynein heavy chain 14, axonemal OS=Homo sapiens<br>GN=DNAH14 PE=2 SV=3 - [DYH14_HUMAN]                      | 0.97  | 1  | 1  | 2  | 44 |      |      |      |      | 0.49 | 0.34 | 0.73 | 0.58  | 3507 399.6 6.93 |
| Q9UFH2 | Dynein heavy chain 17, axonemal OS=Homo sapiens<br>GN=DNAH17 PE=2 SV=2 - [DYH17_HUMAN]                      | 0.45  | 7  | 2  | 3  | 25 | 1.16 | 1.18 | 1.27 | 1.32 | 0.05 | 0.23 | 0.43 | 1.88  | 4485 511.5 5.77 |
| Q9P225 | Dynein heavy chain 2, axonemal OS=Homo sapiens<br>GN=DNAH2 PE=1 SV=3 - [DYH2_HUMAN]                         | 0.32  | 1  | 1  | 1  | 1  | 0.90 | 0.84 | 0.87 | 0.82 |      |      |      | 4427  | 507.4 6.37      |
| Q8TD57 | Dynein heavy chain 3, axonemal OS=Homo sapiens<br>GN=DNAH3 PE=2 SV=1 - [DYH3_HUMAN]                         | 1.72  | 1  | 2  | 3  | 4  | 1.24 | 1.29 | 0.95 | 1.06 |      |      |      | 4116  | 470.5 6.43      |
| Q8TE73 | Dynein heavy chain 5, axonemal OS=Homo sapiens<br>GN=DNAH5 PE=1 SV=3 - [DYH5_HUMAN]                         | 1.23  | 8  | 3  | 5  | 20 | 0.90 | 1.32 | 1.12 | 1.65 | 1.18 | 1.21 | 1.24 | 1.27  | 4624 528.7 6.10 |
| Q9C0G6 | Dynein heavy chain 6, axonemal OS=Homo sapiens<br>GN=DNAH6 PE=1 SV=3 - [DYH6_HUMAN]                         | 0.87  | 9  | 3  | 4  | 5  | 2.38 | 2.28 | 2.49 | 2.41 | 1.24 | 1.18 | 1.15 | 1.09  | 4158 475.7 6.00 |
| Q8WXX0 | Dynein heavy chain 7, axonemal OS=Homo sapiens<br>GN=DNAH7 PE=1 SV=2 - [DYH7_HUMAN]                         | 0.92  | 1  | 3  | 3  | 5  | 1.30 | 1.15 | 1.40 | 1.26 | 1.41 | 1.16 | 0.95 | 0.78  | 4024 460.9 6.00 |
| Q96JB1 | Dynein heavy chain 8, axonemal OS=Homo sapiens<br>GN=DNAH8 PE=1 SV=2 - [DYH8_HUMAN]                         | 2.65  | 11 | 6  | 9  | 28 | 2.30 | 2.05 | 0.90 | 0.81 | 0.94 | 0.79 | 1.06 | 0.94  | 4490 514.3 6.32 |
| Q9NYC9 | Dynein heavy chain 9, axonemal OS=Homo sapiens<br>GN=DNAH9 PE=1 SV=3 - [DYH9_HUMAN]                         | 0.74  | 1  | 2  | 2  | 2  | 1.27 | 1.65 | 0.97 | 1.27 |      |      |      |       | 4486 511.6 5.91 |
| Q96M86 | Dynein heavy chain domain-containing protein 1 OS=Homo sapiens<br>GN=DNHD1 PE=1 SV=2 - [DNHD1_HUMAN]        | 1.51  | 1  | 4  | 4  | 18 | 1.12 | 1.10 | 1.16 | 1.14 | 1.01 | 0.88 | 1.03 | 0.89  | 4753 533.3 6.71 |
| Q96FJ2 | Dynein light chain 2, cytoplasmic OS=Homo sapiens<br>GN=DYNLL2 PE=1 SV=1 - [DYL2_HUMAN]                     | 24.72 | 1  | 1  | 1  | 1  | 1.02 | 0.71 | 0.61 | 0.42 |      |      |      | 89    | 10.3 7.37       |
| O75923 | Dysferlin OS=Homo sapiens GN=DYSF PE=1 SV=1 - [DYSF_HUMAN]                                                  | 1.20  | 1  | 1  | 1  | 1  | 0.54 | 0.70 | 0.70 | 0.92 |      |      |      | 2080  | 237.1 5.64      |
| Q8IZA0 | Dyslexia-associated protein KIAA0319-like protein OS=Homo sapiens<br>GN=KIAA0319L PE=1 SV=2 - [K319L_HUMAN] | 0.76  | 1  | 1  | 1  | 3  |      |      |      |      | 0.90 | 1.14 | 1.09 | 1.38  | 1049 115.6 6.05 |
| Q03001 | Dystonin OS=Homo sapiens GN=DST PE=1 SV=4 - [DYST_HUMAN]                                                    | 2.22  | 7  | 10 | 12 | 23 | 1.04 | 0.86 | 0.97 | 0.85 | 1.13 | 0.99 | 1.25 | 1.05  | 7570 860.1 5.25 |
| Q9Y4J8 | Dystrobrevin alpha OS=Homo sapiens GN=DTNA PE=1 SV=2 [DTNA_HUMAN]                                           | 2.29  | 1  | 1  | 1  | 3  |      |      | 1.21 | 0.77 |      |      |      | 743   | 83.8 6.89       |
| Q14118 | Dystroglycan OS=Homo sapiens GN=DAG1 PE=1 SV=2 - [DAG1_HUMAN]                                               | 16.42 | 1  | 10 | 10 | 34 | 1.20 | 1.13 | 1.18 | 1.08 | 0.95 | 0.86 | 0.90 | 0.83  | 895 97.4 8.56   |
| P11532 | Dystrophin OS=Homo sapiens GN=DMD PE=1 SV=3 - [DMD_HUMAN]                                                   | 1.00  | 2  | 2  | 3  | 5  | 0.95 | 1.11 | 1.12 | 1.34 |      |      |      | 3685  | 426.5 5.88      |
| Q96L91 | E1A-binding protein p400 OS=Homo sapiens GN=EP400 PE=1 SV=4 - [EP400_HUMAN]                                 | 1.17  | 1  | 1  | 1  | 1  |      |      |      |      | 0.91 | 0.82 |      | 3159  | 343.3 9.19      |
| Q9UII4 | E3 ISG15--protein ligase HERC5 OS=Homo sapiens<br>GN=HERC5 PE=1 SV=2 - [HERC5_HUMAN]                        | 1.86  | 1  | 1  | 1  | 1  |      |      |      |      | 1.99 | 1.98 | 2.12 | 2.11  | 1024 116.8 7.65 |
| P49792 | E3 SUMO-protein ligase RanBP2 OS=Homo sapiens<br>GN=RANBP2 PE=1 SV=2 - [RBP2_HUMAN]                         | 1.83  | 2  | 2  | 5  | 16 | 1.61 | 1.37 | 1.20 | 1.02 | 0.60 | 0.87 | 0.40 | 0.58  | 3224 358.0 6.20 |
| Q6ZNA4 | E3 ubiquitin-protein ligase Arkadia OS=Homo sapiens<br>GN=RN111 PE=1 SV=3 - [RN111_HUMAN]                   | 1.21  | 1  | 1  | 1  | 1  |      |      |      |      | 0.26 | 0.22 | 0.52 | 0.45  | 994 108.8 7.15  |
| Q5VTR2 | E3 ubiquitin-protein ligase BRE1A OS=Homo sapiens<br>GN=RN20 PE=1 SV=2 - [BRE1A_HUMAN]                      | 0.92  | 1  | 1  | 1  | 1  |      |      |      |      | 1.62 | 0.66 |      | 975   | 113.6 5.94      |
| O75150 | E3 ubiquitin-protein ligase BRE1B OS=Homo sapiens<br>GN=RN40 PE=1 SV=4 - [BRE1B_HUMAN]                      | 3.90  | 1  | 2  | 2  | 2  | 1.42 | 1.19 | 1.59 | 1.33 | 0.74 | 0.71 | 0.90 | 0.86  | 1001 113.6 6.23 |
| P22681 | E3 ubiquitin-protein ligase CBL OS=Homo sapiens GN=CBL PE=1 SV=2 - [CBL_HUMAN]                              | 1.43  | 1  | 1  | 1  | 1  |      |      |      |      | 0.73 | 0.73 | 0.69 | 0.69  | 906 99.6 6.54   |
| Q9NW38 | E3 ubiquitin-protein ligase FANCL OS=Homo sapiens<br>GN=FANCL PE=1 SV=2 - [FANCL_HUMAN]                     | 8.53  | 1  | 2  | 2  | 3  | 1.08 | 1.13 | 0.89 | 0.93 | 1.51 | 1.26 | 1.76 | 1.47  | 375 42.9 6.46   |
| Q8IYU2 | E3 ubiquitin-protein ligase HACE1 OS=Homo sapiens<br>GN=HACE1 PE=1 SV=2 - [HACE1_HUMAN]                     | 3.74  | 1  | 1  | 1  | 1  |      |      |      |      | 2.30 | 1.83 | 2.81 | 2.24  | 909 102.3 5.92  |

|        |                                                                                                     |      |   |   |   |    |      |      |      |      |      |      |      |      |      |       |      |
|--------|-----------------------------------------------------------------------------------------------------|------|---|---|---|----|------|------|------|------|------|------|------|------|------|-------|------|
| Q9ULT8 | E3 ubiquitin-protein ligase HECTD1 OS=Homo sapiens<br>GN=HECTD1 PE=1 SV=3 - [HECD1_HUMAN]           | 2.15 | 1 | 3 | 3 | 4  | 0.80 | 0.89 | 0.95 | 1.05 | 0.85 | 0.87 | 0.93 | 0.95 | 2610 | 289.2 | 5.35 |
| Q76N89 | E3 ubiquitin-protein ligase HECW1 OS=Homo sapiens<br>GN=HECW1 PE=1 SV=3 - [HECW1_HUMAN]             | 2.86 | 1 | 2 | 2 | 2  | 0.96 | 0.92 | 1.03 | 0.99 |      |      |      |      | 1606 | 179.4 | 5.50 |
| O95714 | E3 ubiquitin-protein ligase HERC2 OS=Homo sapiens<br>GN=HERC2 PE=1 SV=2 - [HERC2_HUMAN]             | 0.27 | 1 | 1 | 1 | 1  | 0.61 | 0.61 | 0.58 | 0.58 |      |      |      |      | 4834 | 526.9 | 6.28 |
| Q96J02 | E3 ubiquitin-protein ligase Itchy homolog OS=Homo sapiens<br>GN=ITCH PE=1 SV=2 - [ITCH_HUMAN]       | 1.55 | 1 | 1 | 1 | 1  | 1.10 | 0.96 | 0.98 | 0.85 |      |      |      |      | 903  | 102.7 | 6.30 |
| Q86YJ5 | E3 ubiquitin-protein ligase MARCH9 OS=Homo sapiens<br>GN=MARCH9 PE=1 SV=2 - [MARH9_HUMAN]           | 4.62 | 1 | 2 | 2 | 3  |      |      |      |      | 1.11 | 1.07 | 1.14 | 1.11 | 346  | 37.7  | 9.13 |
| Q96AX9 | E3 ubiquitin-protein ligase MIB2 OS=Homo sapiens GN=MIB2<br>PE=1 SV=3 - [MIB2_HUMAN]                | 5.13 | 1 | 3 | 3 | 3  |      |      |      |      | 0.38 | 0.31 | 0.72 | 0.59 | 1013 | 109.9 | 8.44 |
| O60260 | E3 ubiquitin-protein ligase parkin OS=Homo sapiens<br>GN=PARK2 PE=1 SV=2 - [PRKN2_HUMAN]            | 2.37 | 1 | 1 | 1 | 1  | 0.86 | 0.82 |      |      |      |      |      |      | 465  | 51.6  | 7.06 |
| Q8N2H9 | E3 ubiquitin-protein ligase pellino homolog 3 OS=Homo sapiens<br>GN=PELI3 PE=1 SV=2 - [PELI3_HUMAN] | 5.33 | 1 | 1 | 1 | 3  |      |      |      |      | 0.87 | 0.59 | 0.69 | 0.47 | 469  | 50.7  | 7.44 |
| O43164 | E3 ubiquitin-protein ligase Praja-2 OS=Homo sapiens<br>GN=PJA2 PE=1 SV=4 - [PJA2_HUMAN]             | 4.24 | 1 | 2 | 2 | 21 | 5.97 | 7.87 | 6.38 | 8.43 | 0.40 | 0.26 | 1.25 | 0.88 | 708  | 78.2  | 4.39 |
| Q7Z6E9 | E3 ubiquitin-protein ligase RBBP6 OS=Homo sapiens<br>GN=RBBP6 PE=1 SV=1 - [RBBP6_HUMAN]             | 1.56 | 1 | 4 | 4 | 5  |      |      |      |      | 0.98 | 0.95 | 0.78 | 0.74 | 1792 | 201.4 | 9.64 |
| Q99496 | E3 ubiquitin-protein ligase RING2 OS=Homo sapiens<br>GN=RNFB2 PE=1 SV=1 - [RING2_HUMAN]             | 4.46 | 1 | 1 | 1 | 1  | 1.01 | 0.90 | 1.15 | 1.03 |      |      |      |      | 336  | 37.6  | 6.84 |
| Q9NVW2 | E3 ubiquitin-protein ligase RLIM OS=Homo sapiens GN=RLIM<br>PE=1 SV=3 - [RNF12_HUMAN]               | 1.92 | 1 | 1 | 1 | 2  |      |      |      |      | 1.12 | 0.51 | 0.84 | 0.38 | 624  | 68.5  | 7.56 |
| Q5XPI4 | E3 ubiquitin-protein ligase RNF123 OS=Homo sapiens<br>GN=RNF123 PE=1 SV=1 - [RN123_HUMAN]           | 1.45 | 1 | 2 | 2 | 3  | 1.08 | 1.14 | 1.06 | 1.12 | 0.91 | 0.65 | 0.98 | 0.70 | 1314 | 148.4 | 6.74 |
| Q96EQ8 | E3 ubiquitin-protein ligase RNF125 OS=Homo sapiens<br>GN=RNF125 PE=1 SV=4 - [RN125_HUMAN]           | 5.17 | 1 | 1 | 1 | 1  |      |      |      |      | 1.28 | 1.20 | 1.37 | 1.28 | 232  | 26.4  | 7.12 |
| O43567 | E3 ubiquitin-protein ligase RNF13 OS=Homo sapiens<br>GN=RNF13 PE=1 SV=1 - [RNF13_HUMAN]             | 2.10 | 1 | 1 | 1 | 1  |      |      |      |      | 1.44 | 1.36 | 1.28 | 1.21 | 381  | 42.8  | 4.98 |
| Q86XS8 | E3 ubiquitin-protein ligase RNF130 OS=Homo sapiens<br>GN=RNF130 PE=1 SV=1 - [GOLI_HUMAN]            | 3.10 | 1 | 1 | 1 | 2  |      |      |      |      | 0.70 | 0.57 | 0.81 | 0.65 | 419  | 46.4  | 8.87 |
| Q8IUD6 | E3 ubiquitin-protein ligase RNF135 OS=Homo sapiens<br>GN=RNF135 PE=1 SV=2 - [RN135_HUMAN]           | 3.47 | 1 | 1 | 1 | 1  | 0.88 | 0.86 | 0.85 | 0.84 |      |      |      |      | 432  | 47.9  | 6.81 |
| Q8WVD3 | E3 ubiquitin-protein ligase RNF138 OS=Homo sapiens<br>GN=RNF138 PE=1 SV=1 - [RN138_HUMAN]           | 4.08 | 1 | 1 | 1 | 1  | 0.22 | 0.44 |      |      |      |      |      |      | 245  | 28.2  | 6.93 |
| Q9P0P0 | E3 ubiquitin-protein ligase RNF181 OS=Homo sapiens<br>GN=RNF181 PE=1 SV=1 - [RN181_HUMAN]           | 6.54 | 1 | 1 | 1 | 1  |      |      |      |      | 0.84 | 0.52 | 0.92 | 0.57 | 153  | 17.9  | 5.06 |
| Q9NV58 | E3 ubiquitin-protein ligase RNF19A OS=Homo sapiens<br>GN=RNF19A PE=1 SV=3 - [RN19A_HUMAN]           | 1.79 | 1 | 1 | 1 | 1  |      |      |      |      | 0.86 | 0.82 | 0.87 | 0.84 | 838  | 90.6  | 7.01 |
| Q96BH1 | E3 ubiquitin-protein ligase RNF25 OS=Homo sapiens<br>GN=RNF25 PE=1 SV=1 - [RNF25_HUMAN]             | 4.79 | 1 | 1 | 1 | 4  |      |      |      |      | 1.35 | 1.66 | 1.19 | 1.46 | 459  | 51.2  | 6.54 |
| Q969K3 | E3 ubiquitin-protein ligase RNF34 OS=Homo sapiens<br>GN=RNF34 PE=1 SV=1 - [RNF34_HUMAN]             | 7.53 | 1 | 1 | 1 | 1  | 1.02 | 1.03 | 0.98 | 1.00 |      |      |      |      | 372  | 41.6  | 4.96 |
| Q149N8 | E3 ubiquitin-protein ligase SHPRH OS=Homo sapiens<br>GN=SHPRH PE=1 SV=2 - [SHPRH_HUMAN]             | 2.97 | 1 | 3 | 3 | 5  | 1.10 | 1.04 | 0.99 | 0.94 | 0.69 | 0.89 | 0.58 | 0.74 | 1683 | 193.0 | 7.47 |
| Q86TM6 | E3 ubiquitin-protein ligase synoviolin OS=Homo sapiens<br>GN=SYVN1 PE=1 SV=2 - [SYVN1_HUMAN]        | 3.40 | 1 | 2 | 2 | 2  | 0.78 | 0.99 | 0.77 | 0.98 | 0.79 | 1.08 | 3.50 | 4.78 | 617  | 67.6  | 6.95 |
| Q9NS56 | E3 ubiquitin-protein ligase Topors OS=Homo sapiens<br>GN=TOPORS PE=1 SV=1 - [TOPRS_HUMAN]           | 2.97 | 1 | 1 | 1 | 1  | 0.90 | 0.93 | 0.90 | 0.94 |      |      |      |      | 1045 | 119.1 | 9.51 |
| P36406 | E3 ubiquitin-protein ligase TRIM23 OS=Homo sapiens<br>GN=TRIM23 PE=1 SV=1 - [TRI23_HUMAN]           | 5.75 | 2 | 2 | 2 | 5  | 0.99 | 1.12 | 0.92 | 1.04 |      |      |      |      | 574  | 64.0  | 6.38 |
| Q13049 | E3 ubiquitin-protein ligase TRIM32 OS=Homo sapiens<br>GN=TRIM32 PE=1 SV=2 - [TRI32_HUMAN]           | 5.67 | 1 | 2 | 2 | 2  |      |      |      |      | 0.92 | 0.61 | 1.34 | 0.89 | 653  | 71.9  | 6.98 |

|        |                                                                                                                     |       |   |    |    |     |      |      |      |      |      |      |       |      |      |       |      |
|--------|---------------------------------------------------------------------------------------------------------------------|-------|---|----|----|-----|------|------|------|------|------|------|-------|------|------|-------|------|
| Q9UPN9 | E3 ubiquitin-protein ligase TRIM33 OS=Homo sapiens GN=TRIM33 PE=1 SV=3 - [TRI33_HUMAN]                              | 0.80  | 1 | 1  | 1  | 3   | 0.92 | 0.47 | 0.88 | 0.45 |      | 1127 | 122.5 | 6.67 |      |       |      |
| Q9NQ86 | E3 ubiquitin-protein ligase TRIM36 OS=Homo sapiens GN=TRIM36 PE=2 SV=2 - [TRI36_HUMAN]                              | 2.20  | 1 | 1  | 1  | 1   | 0.99 | 1.17 | 0.88 | 1.03 |      | 728  | 83.0  | 6.11 |      |       |      |
| Q9C026 | E3 ubiquitin-protein ligase TRIM9 OS=Homo sapiens GN=TRIM9 PE=1 SV=1 - [TRIM9_HUMAN]                                | 1.69  | 1 | 1  | 1  | 1   | 0.54 | 0.45 | 0.65 | 0.54 |      | 710  | 79.1  | 6.84 |      |       |      |
| Q8IWW7 | E3 ubiquitin-protein ligase UBR1 OS=Homo sapiens GN=UBR1 PE=1 SV=1 - [UBR1_HUMAN]                                   | 0.69  | 1 | 1  | 1  | 1   | 0.82 | 0.92 | 0.94 | 1.07 |      | 1749 | 200.1 | 6.01 |      |       |      |
| Q6ZT12 | E3 ubiquitin-protein ligase UBR3 OS=Homo sapiens GN=UBR3 PE=2 SV=2 - [UBR3_HUMAN]                                   | 0.37  | 1 | 1  | 1  | 1   | 0.73 | 1.08 | 2.91 | 4.35 |      | 1888 | 212.3 | 6.10 |      |       |      |
| Q5T4S7 | E3 ubiquitin-protein ligase UBR4 OS=Homo sapiens GN=UBR4 PE=1 SV=1 - [UBR4_HUMAN]                                   | 1.93  | 9 | 2  | 5  | 16  | 1.04 | 1.07 | 0.99 | 1.04 |      | 5183 | 573.5 | 6.04 |      |       |      |
| Q8ND25 | E3 ubiquitin-protein ligase ZNRF1 OS=Homo sapiens GN=ZNRF1 PE=1 SV=2 - [ZNRF1_HUMAN]                                | 2.64  | 1 | 1  | 1  | 1   | 0.71 |      | 0.79 |      |      | 227  | 23.8  | 6.67 |      |       |      |
| Q15075 | Early endosome antigen 1 OS=Homo sapiens GN=EEA1 PE=1 SV=2 - [EEA1_HUMAN]                                           | 1.20  | 1 | 1  | 1  | 1   | 1.52 | 1.03 | 1.85 | 1.25 |      | 1411 | 162.4 | 5.68 |      |       |      |
| O95834 | Echinoderm microtubule-associated protein-like 2 OS=Homo sapiens GN=EML2 PE=2 SV=1 - [EMAL2_HUMAN]                  | 1.54  | 1 | 1  | 1  | 1   |      | 1.18 | 0.36 | 0.74 | 0.23 | 649  | 70.6  | 6.32 |      |       |      |
| Q9HC35 | Echinoderm microtubule-associated protein-like 4 OS=Homo sapiens GN=EML4 PE=1 SV=3 - [EMAL4_HUMAN]                  | 2.65  | 1 | 1  | 1  | 8   |      | 0.38 | 0.16 | 0.88 | 0.38 | 981  | 108.8 | 6.40 |      |       |      |
| Q6ZMW3 | Echinoderm microtubule-associated protein-like 6 OS=Homo sapiens GN=EML6 PE=2 SV=2 - [EMAL6_HUMAN]                  | 1.43  | 2 | 2  | 2  | 2   | 1.13 | 1.13 | 1.04 | 1.04 |      | 1958 | 217.8 | 7.44 |      |       |      |
| Q13508 | Ecto-ADP-ribosyltransferase 3 OS=Homo sapiens GN=ART3 PE=1 SV=2 - [NAR3_HUMAN]                                      | 9.77  | 3 | 2  | 3  | 7   | 0.98 | 1.10 | 1.01 | 1.15 | 0.75 | 0.75 | 0.88  | 0.87 | 389  | 43.9  | 6.06 |
| Q93070 | Ecto-ADP-ribosyltransferase 4 OS=Homo sapiens GN=ART4 PE=2 SV=2 - [NAR4_HUMAN]                                      | 3.18  | 1 | 1  | 1  | 5   | 1.01 | 1.15 | 1.06 | 1.22 | 1.12 | 1.04 | 1.02  | 0.95 | 314  | 35.9  | 9.22 |
| O14682 | Ectoderm-neural cortex protein 1 OS=Homo sapiens GN=ENC1 PE=1 SV=2 - [ENC1_HUMAN]                                   | 1.70  | 1 | 1  | 1  | 1   |      | 1.32 | 1.21 | 0.88 | 0.80 | 589  | 66.1  | 6.84 |      |       |      |
| O75356 | Ectonucleoside triphosphate diphosphohydrolase 5 OS=Homo sapiens GN=ENTPD5 PE=1 SV=1 - [ENTP5_HUMAN]                | 3.50  | 1 | 1  | 1  | 1   | 1.08 | 1.23 | 1.09 | 1.24 |      | 428  | 47.5  | 6.33 |      |       |      |
| Q13822 | Ectonucleotide pyrophosphatase/phosphodiesterase family member 2 OS=Homo sapiens GN=ENPP2 PE=1 SV=3 - [ENPP2_HUMAN] | 15.30 | 1 | 9  | 9  | 30  | 1.60 | 1.98 | 1.37 | 1.72 | 1.24 | 1.13 | 1.00  | 1.12 | 863  | 98.9  | 7.37 |
| Q6UWV6 | Ectonucleotide pyrophosphatase/phosphodiesterase family member 7 OS=Homo sapiens GN=ENPP7 PE=1 SV=3 - [ENPP7_HUMAN] | 3.49  | 1 | 1  | 1  | 1   | 1.04 | 1.23 | 1.02 | 1.21 |      | 458  | 51.5  | 6.89 |      |       |      |
| Q9HCE0 | Ectopic P granules protein 5 homolog OS=Homo sapiens GN=EPG5 PE=2 SV=2 - [EPG5_HUMAN]                               | 0.58  | 1 | 1  | 1  | 1   |      | 0.68 | 0.92 | 0.67 | 0.90 | 2579 | 292.3 | 6.43 |      |       |      |
| Q9HAE3 | EF-hand calcium-binding domain-containing protein 1 OS=Homo sapiens GN=EFCAB1 PE=2 SV=1 - [EFCB1_HUMAN]             | 5.21  | 1 | 1  | 1  | 1   | 0.81 | 0.61 | 0.76 | 0.58 |      | 211  | 24.5  | 5.06 |      |       |      |
| Q8N7B9 | EF-hand calcium-binding domain-containing protein 3 OS=Homo sapiens GN=EFCAB3 PE=1 SV=1 - [EFCB3_HUMAN]             | 4.57  | 1 | 1  | 1  | 1   | 0.79 | 0.83 | 0.55 | 0.59 |      | 438  | 50.1  | 9.22 |      |       |      |
| Q9BSW2 | EF-hand calcium-binding domain-containing protein 4B OS=Homo sapiens GN=EFCAB4B PE=1 SV=1 - [EFC4B_HUMAN]           | 2.03  | 1 | 1  | 1  | 1   |      | 1.21 | 1.23 | 1.49 | 1.52 | 395  | 45.6  | 5.01 |      |       |      |
| Q5JST6 | EF-hand domain-containing family member C2 OS=Homo sapiens GN=EFHC2 PE=1 SV=2 - [EFHC2_HUMAN]                       | 1.07  | 1 | 1  | 1  | 1   |      | 0.71 | 0.77 | 0.77 | 0.84 | 749  | 87.3  | 7.37 |      |       |      |
| Q96C19 | EF-hand domain-containing protein D2 OS=Homo sapiens GN=EFHD2 PE=1 SV=1 - [EFHD2_HUMAN]                             | 2.92  | 1 | 1  | 1  | 2   |      | 1.36 | 1.36 | 1.21 | 1.22 | 240  | 26.7  | 5.20 |      |       |      |
| Q12805 | EGF-containing fibulin-like extracellular matrix protein 1 OS=Homo sapiens GN=EFEMP1 PE=1 SV=2 - [FBLN3_HUMAN]      | 37.93 | 1 | 12 | 12 | 102 | 1.02 | 1.06 | 0.97 | 1.03 | 0.99 | 0.91 | 0.95  | 0.86 | 493  | 54.6  | 5.07 |
| Q9UHX3 | EGF-like module-containing mucin-like hormone receptor-like 2 OS=Homo sapiens GN=EMR2 PE=1 SV=2 - [EMR2_HUMAN]      | 6.44  | 1 | 2  | 2  | 3   | 1.08 | 1.04 | 1.15 | 1.11 |      | 823  | 90.4  | 6.87 |      |       |      |
| Q9GZT9 | Egl nine homolog 1 OS=Homo sapiens GN=EGLN1 PE=1 SV=1 - [EGLN1_HUMAN]                                               | 2.82  | 1 | 1  | 1  | 1   |      | 0.91 | 1.12 | 0.99 | 1.21 | 426  | 46.0  | 8.53 |      |       |      |
| Q8NDI1 | EH domain-binding protein 1 OS=Homo sapiens GN=EHP1 PE=1 SV=3 - [EHP1_HUMAN]                                        | 3.01  | 1 | 2  | 2  | 2   | 0.67 | 0.61 | 0.60 | 0.55 | 2.92 | 2.79 | 2.82  | 2.70 | 1231 | 139.9 | 5.35 |

|        |                                                                                                                            |       |   |   |   |    |      |      |      |      |      |      |       |      |      |       |      |
|--------|----------------------------------------------------------------------------------------------------------------------------|-------|---|---|---|----|------|------|------|------|------|------|-------|------|------|-------|------|
| Q8N3D4 | EH domain-binding protein 1-like protein 1 OS=Homo sapiens GN=EHP1L1 PE=1 SV=2 - [EH1L1_HUMAN]                             | 0.72  | 1 | 1 | 1 | 1  | 0.72 | 0.84 | 0.89 | 1.04 |      | 1523 | 161.8 | 4.83 |      |       |      |
| Q9H4M9 | EH domain-containing protein 1 OS=Homo sapiens GN=EHD1 PE=1 SV=2 - [EHD1_HUMAN]                                            | 9.74  | 2 | 1 | 3 | 4  | 0.87 | 0.53 | 1.09 | 0.66 |      | 534  | 60.6  | 6.83 |      |       |      |
| Q9NZN4 | EH domain-containing protein 2 OS=Homo sapiens GN=EHD2 PE=1 SV=2 - [EHD2_HUMAN]                                            | 2.76  | 1 | 1 | 1 | 1  |      |      |      |      | 0.71 | 0.68 | 0.61  | 0.59 | 543  | 61.1  | 6.46 |
| Q9NZN3 | EH domain-containing protein 3 OS=Homo sapiens GN=EHD3 PE=1 SV=2 - [EHD3_HUMAN]                                            | 20.93 | 2 | 6 | 8 | 26 | 0.50 | 0.49 | 0.55 | 0.54 | 1.58 | 1.56 | 1.51  | 1.38 | 535  | 60.8  | 6.57 |
| P19957 | Elafin OS=Homo sapiens GN=PI3 PE=1 SV=3 - [ELAF_HUMAN]                                                                     | 7.69  | 1 | 1 | 1 | 2  |      |      |      |      | 1.12 | 1.04 | 1.12  | 1.04 | 117  | 12.3  | 8.82 |
| Q8IUD2 | ELKS/Rab6-interacting/CAST family member 1 OS=Homo sapiens GN=ERC1 PE=1 SV=1 - [RB6I2_HUMAN]                               | 1.61  | 1 | 1 | 1 | 1  |      |      |      |      | 1.63 | 1.19 | 0.94  | 0.69 | 1116 | 128.0 | 5.97 |
| P57679 | Ellis-van Creveld syndrome protein OS=Homo sapiens GN=EVC PE=1 SV=1 - [EVC_HUMAN]                                          | 2.52  | 1 | 2 | 2 | 2  | 1.11 | 1.48 | 1.18 | 1.59 |      |      |       |      | 992  | 111.9 | 6.73 |
| P68104 | Elongation factor 1-alpha 1 OS=Homo sapiens GN=EEF1A1 PE=1 SV=1 - [EF1A1_HUMAN]                                            | 4.11  | 3 | 2 | 2 | 6  | 0.87 | 1.05 | 0.83 | 0.99 | 1.04 | 0.97 | 1.05  | 0.98 | 462  | 50.1  | 9.01 |
| P29692 | Elongation factor 1-delta OS=Homo sapiens GN=EEF1D PE=1 SV=5 - [EF1D_HUMAN]                                                | 14.23 | 2 | 4 | 4 | 8  |      |      |      |      | 1.17 | 1.46 | 1.31  | 1.54 | 281  | 31.1  | 5.01 |
| P26641 | Elongation factor 1-gamma OS=Homo sapiens GN=EEF1G PE=1 SV=3 - [EF1G_HUMAN]                                                | 6.41  | 1 | 3 | 3 | 6  |      |      |      |      | 1.47 | 1.23 | 1.41  | 1.18 | 437  | 50.1  | 6.67 |
| P13639 | Elongation factor 2 OS=Homo sapiens GN=EEF2 PE=1 SV=4 - [EF2_HUMAN]                                                        | 2.68  | 1 | 2 | 2 | 3  | 0.97 | 0.97 | 1.07 | 1.08 | 0.63 | 0.70 | 0.57  | 0.64 | 858  | 95.3  | 6.83 |
| Q7Z2Z2 | Elongation factor Tu GTP-binding domain-containing protein 1 OS=Homo sapiens GN=EFTUD1 PE=1 SV=2 - [ETUD1_HUMAN]           | 1.88  | 1 | 1 | 1 | 2  |      | 1.08 |      | 1.18 | 1.12 | 0.95 | 1.12  | 0.95 | 1120 | 125.3 | 5.91 |
| P49411 | Elongation factor Tu, mitochondrial OS=Homo sapiens GN=TUFM PE=1 SV=2 - [EFTU_HUMAN]                                       | 7.52  | 1 | 1 | 1 | 1  | 0.58 | 0.38 | 0.66 | 0.44 |      |      |       |      | 452  | 49.5  | 7.61 |
| Q96EB1 | Elongator complex protein 4 OS=Homo sapiens GN=ELP4 PE=1 SV=2 - [ELP4_HUMAN]                                               | 5.42  | 1 | 1 | 1 | 1  |      |      |      |      | 1.25 | 1.23 | 1.21  | 1.19 | 424  | 46.6  | 8.51 |
| Q6PCB8 | Embigin OS=Homo sapiens GN=EMB PE=1 SV=1 - [EMB_HUMAN]                                                                     | 2.75  | 1 | 1 | 1 | 1  |      |      |      |      | 0.97 | 0.08 | 1.12  | 0.10 | 327  | 36.9  | 6.54 |
| Q9Y6C2 | EMILIN-1 OS=Homo sapiens GN=EMILIN1 PE=1 SV=2 - [EMIL1_HUMAN]                                                              | 0.89  | 1 | 1 | 1 | 3  | 0.77 | 0.75 | 0.73 | 0.72 |      |      |       |      | 1016 | 106.6 | 5.15 |
| Q9UI08 | Ena/VASP-like protein OS=Homo sapiens GN=EVL PE=1 SV=2 - [EVL_HUMAN]                                                       | 5.53  | 1 | 2 | 2 | 7  |      |      |      |      | 0.69 | 0.48 | 0.83  | 0.48 | 416  | 44.6  | 8.84 |
| Q9NRM1 | Enamelin OS=Homo sapiens GN=ENAM PE=2 SV=3 - [ENAM_HUMAN]                                                                  | 1.84  | 1 | 1 | 1 | 6  | 1.12 | 1.12 | 1.16 | 1.16 |      |      |       |      | 1142 | 128.7 | 6.83 |
| P17813 | Endoglin OS=Homo sapiens GN=ENG PE=1 SV=2 - [EGLN_HUMAN]                                                                   | 10.18 | 1 | 5 | 5 | 12 | 1.42 | 1.41 | 1.40 | 1.36 | 0.79 | 0.83 | 0.73  | 0.76 | 658  | 70.5  | 6.61 |
| O94919 | Endonuclease domain-containing 1 protein OS=Homo sapiens GN=ENDOD1 PE=1 SV=2 - [ENDD1_HUMAN]                               | 4.80  | 1 | 2 | 2 | 5  | 0.87 | 0.87 | 0.99 | 1.01 | 0.97 | 0.93 | 0.99  | 0.96 | 500  | 55.0  | 5.71 |
| Q7L9B9 | Endonuclease/exonuclease/phosphatase family domain-containing protein 1 OS=Homo sapiens GN=EEPD1 PE=1 SV=2 - [EEPD1_HUMAN] | 3.87  | 1 | 2 | 2 | 2  |      |      |      |      | 1.54 | 1.38 | 1.44  | 1.30 | 569  | 62.4  | 8.41 |
| Q9NR46 | Endophilin-B2 OS=Homo sapiens GN=SH3GLB2 PE=1 SV=1 - [SHLB2_HUMAN]                                                         | 3.80  | 1 | 1 | 1 | 2  | 0.64 | 0.62 | 0.57 | 0.57 | 1.24 | 1.31 | 1.26  | 1.33 | 395  | 43.9  | 5.99 |
| Q9NZ08 | Endoplasmic reticulum aminopeptidase 1 OS=Homo sapiens GN=ERAP1 PE=1 SV=3 - [ERAP1_HUMAN]                                  | 1.38  | 1 | 1 | 1 | 2  | 0.66 | 0.69 | 0.60 | 0.63 |      |      |       |      | 941  | 107.2 | 6.46 |
| Q6P179 | Endoplasmic reticulum aminopeptidase 2 OS=Homo sapiens GN=ERAP2 PE=1 SV=2 - [ERAP2_HUMAN]                                  | 7.40  | 1 | 6 | 6 | 11 | 0.95 | 0.94 | 0.97 | 0.91 | 1.63 | 1.45 | 1.46  | 1.31 | 960  | 110.4 | 6.71 |
| Q9UKM7 | Endoplasmic reticulum mannosyl-oligosaccharide 1,2-alpha-mannosidase OS=Homo sapiens GN=MAN1B1 PE=1 SV=2 - [MA1B1_HUMAN]   | 3.58  | 1 | 1 | 1 | 1  | 1.29 |      | 1.35 |      |      |      |       |      | 699  | 79.5  | 7.72 |
| Q7Z2K6 | Endoplasmic reticulum metalloproteinase 1 OS=Homo sapiens GN=ERMP1 PE=1 SV=2 - [ERMP1_HUMAN]                               | 1.11  | 1 | 1 | 1 | 1  | 1.03 | 1.11 | 1.07 | 1.15 |      |      |       |      | 904  | 100.2 | 7.52 |
| P30040 | Endoplasmic reticulum resident protein 29 OS=Homo sapiens GN=ERP29 PE=1 SV=4 - [ERP29_HUMAN]                               | 6.51  | 1 | 2 | 2 | 3  | 1.04 | 1.12 | 0.90 | 0.96 | 0.88 | 1.06 | 0.89  | 1.06 | 261  | 29.0  | 7.31 |

|        |                                                                                                   |       |   |   |    |    |      |      |      |      |      |      |      |      |      |       |       |
|--------|---------------------------------------------------------------------------------------------------|-------|---|---|----|----|------|------|------|------|------|------|------|------|------|-------|-------|
| Q9BS26 | Endoplasmic reticulum resident protein 44 OS=Homo sapiens GN=ERP44 PE=1 SV=1 - [ERP44_HUMAN]      | 15.27 | 1 | 5 | 5  | 11 | 0.75 | 0.76 | 0.83 | 0.84 | 1.00 | 0.97 | 0.98 | 0.95 | 406  | 46.9  | 5.26  |
| P14625 | Endoplasmic reticulum protein OS=Homo sapiens GN=HSP90B1 PE=1 SV=1 - [ENPL_HUMAN]                 | 13.08 | 1 | 7 | 10 | 18 | 0.92 | 0.90 | 0.96 | 0.95 | 1.09 | 1.02 | 1.01 | 0.79 | 803  | 92.4  | 4.84  |
| Q9UPY3 | Endoribonuclease Dicer OS=Homo sapiens GN=DICER1 PE=1 SV=3 - [DICER_HUMAN]                        | 3.43  | 1 | 3 | 3  | 18 | 1.65 | 1.69 | 2.02 | 2.08 |      |      |      |      | 1922 | 218.5 | 5.68  |
| Q9HCU0 | Endosialin OS=Homo sapiens GN=CD248 PE=1 SV=1 - [CD248_HUMAN]                                     | 1.32  | 1 | 1 | 1  | 2  | 1.10 | 0.90 | 1.00 | 0.82 |      |      |      |      | 757  | 80.8  | 5.35  |
| Q96AP7 | Endothelial cell-selective adhesion molecule OS=Homo sapiens GN=ESAM PE=1 SV=1 - [ESAM_HUMAN]     | 2.82  | 1 | 1 | 1  | 2  |      |      |      |      | 1.04 | 1.05 | 1.02 | 1.02 | 390  | 41.2  | 9.32  |
| Q99814 | Endothelial PAS domain-containing protein 1 OS=Homo sapiens GN=EPAS1 PE=1 SV=3 - [EPAS1_HUMAN]    | 1.95  | 1 | 2 | 2  | 5  | 0.54 | 0.64 | 0.61 | 0.75 |      |      |      |      | 870  | 96.4  | 6.28  |
| O60344 | Endothelin-converting enzyme 2 OS=Homo sapiens GN=ECE2 PE=1 SV=4 - [ECE2_HUMAN]                   | 4.98  | 1 | 2 | 2  | 12 | 1.72 | 1.06 | 1.86 | 1.16 |      |      |      |      | 883  | 99.7  | 5.10  |
| Q96JJ3 | Engulfment and cell motility protein 2 OS=Homo sapiens GN=ELMO2 PE=1 SV=2 - [ELMO2_HUMAN]         | 0.83  | 1 | 1 | 1  | 1  | 1.16 | 0.85 | 1.17 | 0.86 |      |      |      |      | 720  | 82.6  | 5.90  |
| Q96BJ8 | Engulfment and cell motility protein 3 OS=Homo sapiens GN=ELMO3 PE=1 SV=3 - [ELMO3_HUMAN]         | 2.36  | 1 | 1 | 1  | 1  | 1.10 | 1.21 | 1.15 | 1.27 |      |      |      |      | 720  | 81.4  | 6.30  |
| Q14511 | Enhancer of filamentation 1 OS=Homo sapiens GN=NEDD9 PE=1 SV=1 - [CASL_HUMAN]                     | 0.96  | 1 | 1 | 1  | 4  |      |      |      |      | 0.90 | 0.97 | 1.45 | 1.56 | 834  | 92.8  | 6.70  |
| Q6P2E9 | Enhancer of mRNA-decapping protein 4 OS=Homo sapiens GN=EDC4 PE=1 SV=1 - [EDC4_HUMAN]             | 2.43  | 1 | 3 | 3  | 4  | 0.50 | 0.57 | 0.49 | 0.55 | 0.47 | 0.93 | 0.46 | 0.91 | 1401 | 151.6 | 5.86  |
| Q9H2F5 | Enhancer of polycomb homolog 1 OS=Homo sapiens GN=EPC1 PE=1 SV=1 - [EPC1_HUMAN]                   | 3.47  | 1 | 1 | 1  | 2  | 1.40 | 1.06 | 1.82 | 1.38 |      |      |      |      | 836  | 93.4  | 8.59  |
| P30084 | Enoyl-CoA hydratase, mitochondrial OS=Homo sapiens GN=ECHS1 PE=1 SV=4 - [ECHM_HUMAN]              | 7.24  | 1 | 1 | 1  | 1  |      |      |      |      | 1.17 | 1.01 | 1.22 | 1.05 | 290  | 31.4  | 8.07  |
| Q8IYW4 | ENTH domain-containing protein 1 OS=Homo sapiens GN=ENTHD1 PE=2 SV=1 - [ENTD1_HUMAN]              | 1.98  | 1 | 1 | 1  | 3  | 1.25 | 1.11 | 1.36 | 1.22 |      |      |      |      | 607  | 67.5  | 6.62  |
| Q92817 | Envoplakin OS=Homo sapiens GN=EVPL PE=1 SV=3 - [EVPL_HUMAN]                                       | 0.44  | 1 | 1 | 1  | 1  |      |      |      |      | 0.77 | 0.85 | 0.92 | 1.02 | 2033 | 231.5 | 6.96  |
| P12724 | Eosinophil cationic protein OS=Homo sapiens GN=RNASE3 PE=1 SV=2 - [ECP_HUMAN]                     | 17.50 | 1 | 2 | 2  | 8  |      |      |      |      | 1.59 | 1.49 | 1.54 | 1.47 | 160  | 18.4  | 10.02 |
| Q05315 | Eosinophil lysophospholipase OS=Homo sapiens GN=CLC PE=1 SV=3 - [LPPL_HUMAN]                      | 13.38 | 1 | 2 | 3  | 3  |      |      |      |      | 1.30 | 1.50 | 1.23 | 1.41 | 142  | 16.4  | 7.37  |
| P11678 | Eosinophil peroxidase OS=Homo sapiens GN=EPX PE=1 SV=2 - [PERE_HUMAN]                             | 7.13  | 1 | 5 | 6  | 10 | 1.68 | 1.84 | 1.64 | 1.76 |      |      |      |      | 715  | 81.0  | 10.29 |
| Q8N140 | EP300-interacting inhibitor of differentiation 3 OS=Homo sapiens GN=EID3 PE=1 SV=1 - [EID3_HUMAN] | 15.32 | 1 | 2 | 2  | 3  | 1.27 |      |      |      |      |      |      |      | 333  | 38.1  | 5.15  |
| Q6ZTU2 | EP400 N-terminal-like protein OS=Homo sapiens GN=EP400NL PE=2 SV=2 - [E400N_HUMAN]                | 3.28  | 1 | 1 | 1  | 1  | 1.50 | 1.33 | 0.80 | 0.71 |      |      |      |      | 488  | 51.7  | 7.27  |
| P21709 | Ephrin type-A receptor 1 OS=Homo sapiens GN=EPHA1 PE=1 SV=4 - [EPHA1_HUMAN]                       | 1.84  | 1 | 2 | 2  | 4  | 0.71 | 0.90 | 0.71 | 0.91 | 4.19 | 4.92 | 4.09 | 4.80 | 976  | 108.1 | 6.64  |
| P29317 | Ephrin type-A receptor 2 OS=Homo sapiens GN=EPHA2 PE=1 SV=2 - [EPHA2_HUMAN]                       | 4.10  | 1 | 2 | 2  | 3  | 1.00 | 0.99 | 1.04 | 1.05 | 1.65 | 1.83 | 1.34 | 1.49 | 976  | 108.2 | 6.23  |
| P29320 | Ephrin type-A receptor 3 OS=Homo sapiens GN=EPHA3 PE=1 SV=2 - [EPHA3_HUMAN]                       | 1.53  | 1 | 1 | 1  | 2  |      |      |      |      | 0.85 | 0.76 | 1.37 | 0.65 | 983  | 110.1 | 6.76  |
| P54764 | Ephrin type-A receptor 4 OS=Homo sapiens GN=EPHA4 PE=1 SV=1 - [EPHA4_HUMAN]                       | 4.67  | 1 | 2 | 2  | 2  |      |      |      |      | 0.44 | 0.20 | 0.94 | 0.42 | 986  | 109.8 | 6.61  |
| Q15375 | Ephrin type-A receptor 7 OS=Homo sapiens GN=EPHA7 PE=1 SV=3 - [EPHA7_HUMAN]                       | 1.30  | 1 | 1 | 1  | 5  |      |      |      |      | 0.59 | 0.40 | 0.64 | 0.50 | 998  | 112.0 | 5.80  |
| P54760 | Ephrin type-B receptor 4 OS=Homo sapiens GN=EPHB4 PE=1 SV=2 - [EPHB4_HUMAN]                       | 2.13  | 1 | 1 | 1  | 1  | 0.66 | 0.98 | 0.42 | 0.63 |      |      |      |      | 987  | 108.2 | 6.90  |
| O15197 | Ephrin type-B receptor 6 OS=Homo sapiens GN=EPHB6 PE=1 SV=4 - [EPHB6_HUMAN]                       | 0.69  | 1 | 1 | 1  | 1  |      |      |      |      | 0.17 | 0.16 | 0.15 | 0.14 | 1021 | 110.6 | 6.65  |

|        |                                                                                                                      |       |   |   |   |    |      |      |      |      |      |      |       |      |     |       |      |
|--------|----------------------------------------------------------------------------------------------------------------------|-------|---|---|---|----|------|------|------|------|------|------|-------|------|-----|-------|------|
| P20827 | Ephrin-A1 OS=Homo sapiens GN=EFNA1 PE=1 SV=2 - [EFNA1_HUMAN]                                                         | 8.29  | 1 | 2 | 2 | 5  |      | 1.13 | 1.15 | 1.13 | 1.15 | 205  | 23.8  | 6.83 |     |       |      |
| P00533 | Epidermal growth factor receptor OS=Homo sapiens GN=EGFR PE=1 SV=2 - [EGFR_HUMAN]                                    | 6.94  | 1 | 6 | 6 | 10 | 1.02 | 1.00 | 0.98 | 0.96 |      | 1210 | 134.2 | 6.68 |     |       |      |
| P42566 | Epidermal growth factor receptor substrate 15 OS=Homo sapiens GN=EPS15 PE=1 SV=2 - [EPS15_HUMAN]                     | 8.48  | 1 | 4 | 4 | 8  | 0.77 | 1.09 | 0.87 | 1.23 | 0.55 | 0.70 | 0.71  | 0.91 | 896 | 98.6  | 4.64 |
| Q9UBC2 | Epidermal growth factor receptor substrate 15-like 1 OS=Homo sapiens GN=EPS15L1 PE=1 SV=1 - [EP15R_HUMAN]            | 6.71  | 1 | 4 | 4 | 4  | 1.85 | 1.56 | 1.18 | 1.00 | 2.46 | 2.23 | 2.13  | 1.93 | 864 | 94.2  | 5.11 |
| Q8N3Y7 | Epidermal retinol dehydrogenase 2 OS=Homo sapiens GN=SDR16C5 PE=2 SV=2 - [RDHE2_HUMAN]                               | 3.88  | 1 | 1 | 1 | 1  | 1.10 | 1.38 | 1.06 | 1.34 |      |      |       |      | 309 | 34.1  | 8.46 |
| P61916 | Epididymal secretory protein E1 OS=Homo sapiens GN=NPC2 PE=1 SV=1 - [NPC2_HUMAN]                                     | 38.41 | 1 | 4 | 4 | 9  |      |      |      |      | 1.33 | 1.38 | 1.20  | 1.25 | 151 | 16.6  | 7.65 |
| Q99645 | Epiphycan OS=Homo sapiens GN=EPYC PE=2 SV=3 - [EPYC_HUMAN]                                                           | 6.52  | 1 | 1 | 1 | 6  | 1.18 | 1.24 | 1.12 | 1.18 |      |      |       |      | 322 | 36.6  | 4.81 |
| P34913 | Epoxide hydrolase 2 OS=Homo sapiens GN=EPHX2 PE=1 SV=2 - [HYES_HUMAN]                                                | 2.16  | 1 | 1 | 1 | 1  | 1.13 | 1.16 | 1.15 | 1.19 |      |      |       |      | 555 | 62.6  | 6.28 |
| Q9H201 | Epsin-3 OS=Homo sapiens GN=EPN3 PE=1 SV=1 - [EPN3_HUMAN]                                                             | 1.58  | 1 | 1 | 1 | 1  |      |      |      |      | 0.74 | 0.74 | 0.69  | 0.69 | 632 | 68.2  | 5.91 |
| Q7RTT9 | Equilibrative nucleoside transporter 4 OS=Homo sapiens GN=SLC29A4 PE=1 SV=1 - [S29A4_HUMAN]                          | 3.77  | 1 | 1 | 1 | 4  | 0.75 | 0.93 | 0.68 | 0.85 |      |      |       |      | 530 | 58.0  | 7.72 |
| Q9BZQ6 | ER degradation-enhancing alpha-mannosidase-like 3 OS=Homo sapiens GN=EDEM3 PE=1 SV=2 - [EDEM3_HUMAN]                 | 4.94  | 1 | 2 | 2 | 12 | 2.28 | 3.42 | 0.39 | 0.60 | 0.83 | 0.47 | 0.75  | 0.42 | 932 | 104.6 | 4.93 |
| O15083 | ERC protein 2 OS=Homo sapiens GN=ERC2 PE=1 SV=3 - [ERC2_HUMAN]                                                       | 2.19  | 1 | 1 | 1 | 10 | 0.91 | 0.88 | 0.92 | 0.90 |      |      |       |      | 957 | 110.5 | 6.99 |
| A8K979 | ERI1 exonuclease 2 OS=Homo sapiens GN=ERI2 PE=2 SV=2 - [ERI2_HUMAN]                                                  | 4.78  | 1 | 1 | 1 | 1  | 1.14 | 1.16 | 0.96 | 0.97 |      |      |       |      | 691 | 77.4  | 8.90 |
| Q86YB8 | ERO1-like protein beta OS=Homo sapiens GN=ERO1B PE=1 SV=2 - [ERO1B_HUMAN]                                            | 4.50  | 1 | 1 | 1 | 1  | 0.78 | 0.74 | 0.65 | 0.62 |      |      |       |      | 467 | 53.5  | 7.99 |
| P27105 | Erythrocyte band 7 integral membrane protein OS=Homo sapiens GN=STOM PE=1 SV=3 - [STOM_HUMAN]                        | 15.28 | 2 | 5 | 5 | 7  | 0.75 | 0.82 | 0.66 | 0.72 |      |      |       |      | 288 | 31.7  | 7.88 |
| P15976 | Erythroid transcription factor OS=Homo sapiens GN=GATA1 PE=1 SV=1 - [GATA1_HUMAN]                                    | 2.42  | 1 | 1 | 1 | 1  | 1.78 | 1.25 | 1.24 | 0.88 |      |      |       |      | 413 | 42.7  | 8.75 |
| P03372 | Estrogen receptor OS=Homo sapiens GN=ESR1 PE=1 SV=2 - [ESR1_HUMAN]                                                   | 1.85  | 1 | 1 | 1 | 1  |      |      |      |      | 1.05 | 1.15 | 1.15  | 1.26 | 595 | 66.2  | 8.06 |
| P62508 | Estrogen-related receptor gamma OS=Homo sapiens GN=ESRRG PE=1 SV=1 - [ERR3_HUMAN]                                    | 3.06  | 1 | 1 | 1 | 1  | 0.82 | 0.85 | 0.80 | 0.84 |      |      |       |      | 458 | 51.3  | 6.48 |
| O00321 | ETS translocation variant 2 OS=Homo sapiens GN=ETV2 PE=2 SV=1 - [ETV2_HUMAN]                                         | 6.74  | 1 | 1 | 1 | 1  |      |      |      |      | 1.15 |      | 1.69  |      | 341 | 36.5  | 6.54 |
| P41162 | ETS translocation variant 3 OS=Homo sapiens GN=ETV3 PE=1 SV=2 - [ETV3_HUMAN]                                         | 2.34  | 1 | 1 | 1 | 1  | 1.33 | 1.16 | 1.44 | 1.26 |      |      |       |      | 512 | 57.0  | 8.57 |
| Q15723 | ETS-related transcription factor E1f-2 OS=Homo sapiens GN=ELF2 PE=1 SV=2 - [ELF2_HUMAN]                              | 2.53  | 1 | 1 | 1 | 1  | 1.09 | 1.03 | 1.13 | 1.07 |      |      |       |      | 593 | 63.9  | 6.57 |
| P60842 | Eukaryotic initiation factor 4A-I OS=Homo sapiens GN=EIF4A1 PE=1 SV=1 - [IF4A1_HUMAN]                                | 8.13  | 2 | 2 | 2 | 3  | 2.48 | 2.64 | 2.59 | 2.79 | 0.80 | 0.65 | 0.86  | 0.70 | 406 | 46.1  | 5.48 |
| P38919 | Eukaryotic initiation factor 4A-III OS=Homo sapiens GN=EIF4A3 PE=1 SV=4 - [IF4A3_HUMAN]                              | 4.62  | 1 | 1 | 1 | 2  | 1.68 | 1.65 | 1.10 | 1.08 |      |      |       |      | 411 | 46.8  | 6.73 |
| P15170 | Eukaryotic peptide chain release factor GTP-binding subunit ERF3A OS=Homo sapiens GN=GSPT1 PE=1 SV=1 - [ERF3A_HUMAN] | 6.81  | 1 | 2 | 2 | 4  |      |      |      |      | 2.27 | 2.27 | 2.27  | 2.26 | 499 | 55.7  | 5.62 |
| Q8IYD1 | Eukaryotic peptide chain release factor GTP-binding subunit ERF3B OS=Homo sapiens GN=GSPT2 PE=1 SV=2 - [ERF3B_HUMAN] | 3.66  | 1 | 1 | 1 | 1  |      |      |      |      | 0.91 | 0.80 | 0.77  | 0.68 | 628 | 68.8  | 5.43 |
| P05198 | Eukaryotic translation initiation factor 2 subunit 1 OS=Homo sapiens GN=EIF2S1 PE=1 SV=3 - [IF2A_HUMAN]              | 4.13  | 1 | 1 | 1 | 1  |      |      |      |      | 0.98 | 1.14 | 0.91  | 1.07 | 315 | 36.1  | 5.08 |
| P41091 | Eukaryotic translation initiation factor 2 subunit 3 OS=Homo sapiens GN=EIF2S3 PE=1 SV=3 - [IF2G_HUMAN]              | 3.39  | 2 | 1 | 1 | 1  |      |      |      |      | 1.14 | 1.09 | 1.10  | 1.06 | 472 | 51.1  | 8.40 |

|        |                                                                                                                     |       |   |    |    |     |      |      |      |      |      |      |      |      |      |      |       |      |
|--------|---------------------------------------------------------------------------------------------------------------------|-------|---|----|----|-----|------|------|------|------|------|------|------|------|------|------|-------|------|
| Q99613 | Eukaryotic translation initiation factor 3 subunit C OS=Homo sapiens GN=EIF3C PE=1 SV=1 - [EIF3C_HUMAN]             | 1.75  | 1 | 1  | 1  | 2   |      |      |      |      |      | 1.23 | 1.16 | 0.94 | 0.88 | 913  | 105.3 | 5.68 |
| O15371 | Eukaryotic translation initiation factor 3 subunit D OS=Homo sapiens GN=EIF3D PE=1 SV=1 - [EIF3D_HUMAN]             | 6.02  | 1 | 2  | 2  | 2   | 1.17 | 1.23 | 1.21 | 1.28 | 1.00 | 1.18 |      |      |      | 548  | 63.9  | 6.05 |
| Q9Y262 | Eukaryotic translation initiation factor 3 subunit L OS=Homo sapiens GN=EIF3L PE=1 SV=1 - [EIF3L_HUMAN]             | 0.89  | 1 | 1  | 1  | 1   |      |      |      |      |      | 0.46 | 0.73 | 0.36 | 0.58 | 564  | 66.7  | 6.34 |
| Q04637 | Eukaryotic translation initiation factor 4 gamma 1 OS=Homo sapiens GN=EIF4G1 PE=1 SV=4 - [IF4G1_HUMAN]              | 0.63  | 1 | 1  | 1  | 2   |      |      |      |      |      | 1.86 | 1.84 | 1.91 | 1.88 | 1599 | 175.4 | 5.33 |
| O43432 | Eukaryotic translation initiation factor 4 gamma 3 OS=Homo sapiens GN=EIF4G3 PE=1 SV=2 - [IF4G3_HUMAN]              | 0.88  | 1 | 1  | 1  | 2   |      |      |      |      |      | 0.96 | 1.12 | 0.92 | 1.07 | 1585 | 176.5 | 5.38 |
| P23588 | Eukaryotic translation initiation factor 4B OS=Homo sapiens GN=EIF4B PE=1 SV=2 - [IF4B_HUMAN]                       | 1.31  | 1 | 1  | 1  | 3   |      |      |      |      |      | 1.34 | 1.30 | 1.29 | 1.25 | 611  | 69.1  | 5.73 |
| P06730 | Eukaryotic translation initiation factor 4E OS=Homo sapiens GN=EIF4E PE=1 SV=2 - [IF4E_HUMAN]                       | 5.07  | 1 | 2  | 2  | 3   |      |      |      |      |      | 0.50 | 0.53 | 0.46 | 0.49 | 217  | 25.1  | 6.15 |
| Q13542 | Eukaryotic translation initiation factor 4E-binding protein 2 OS=Homo sapiens GN=EIF4EBP2 PE=1 SV=1 - [4EBP2_HUMAN] | 36.67 | 1 | 2  | 2  | 2   | 1.39 | 1.76 | 0.88 | 1.11 |      |      |      |      |      | 120  | 12.9  | 6.67 |
| P55010 | Eukaryotic translation initiation factor 5 OS=Homo sapiens GN=EIF5 PE=1 SV=2 - [IF5_HUMAN]                          | 2.32  | 1 | 1  | 1  | 1   | 1.47 | 1.47 | 1.38 | 1.40 |      |      |      |      |      | 431  | 49.2  | 5.58 |
| P63241 | Eukaryotic translation initiation factor 5A-1 OS=Homo sapiens GN=EIF5A PE=1 SV=2 - [IF5A1_HUMAN]                    | 12.99 | 3 | 2  | 2  | 7   | 0.75 | 0.77 | 0.84 | 0.86 | 1.57 | 1.35 | 1.40 | 1.18 |      | 154  | 16.8  | 5.24 |
| Q96CN4 | EVI5-like protein OS=Homo sapiens GN=EVI5L PE=1 SV=1 - [EVI5L_HUMAN]                                                | 1.39  | 1 | 1  | 1  | 2   | 0.98 | 0.71 | 1.26 | 0.91 | 1.01 | 0.75 | 0.98 | 0.72 |      | 794  | 91.3  | 5.34 |
| Q9NV70 | Exocyst complex component 1 OS=Homo sapiens GN=EXOC1 PE=1 SV=4 - [EXOC1_HUMAN]                                      | 2.46  | 1 | 1  | 1  | 1   |      |      |      |      |      | 1.05 | 1.07 | 0.94 | 0.95 | 894  | 101.9 | 6.61 |
| Q96KP1 | Exocyst complex component 2 OS=Homo sapiens GN=EXOC2 PE=1 SV=1 - [EXOC2_HUMAN]                                      | 2.06  | 1 | 1  | 1  | 1   |      |      |      |      |      | 0.78 | 0.72 | 1.40 | 1.29 | 924  | 104.0 | 6.90 |
| Q17RC7 | Exocyst complex component 3-like protein 4 OS=Homo sapiens GN=EXOC3L4 PE=2 SV=2 - [EX3L4_HUMAN]                     | 4.02  | 1 | 2  | 2  | 2   | 0.78 | 0.50 | 1.28 | 0.82 | 0.60 | 1.04 | 0.66 | 1.14 |      | 722  | 79.8  | 6.32 |
| Q8TAG9 | Exocyst complex component 6 OS=Homo sapiens GN=EXOC6 PE=1 SV=3 - [EXOC6_HUMAN]                                      | 2.24  | 1 | 1  | 1  | 1   | 1.64 | 1.88 | 1.31 | 1.50 |      |      |      |      |      | 804  | 93.7  | 6.20 |
| Q9Y2D4 | Exocyst complex component 6B OS=Homo sapiens GN=EXOC6B PE=1 SV=3 - [EXC6B_HUMAN]                                    | 1.60  | 1 | 1  | 1  | 7   | 1.10 | 0.97 | 1.03 | 0.92 | 0.93 | 1.03 | 0.89 | 0.99 |      | 811  | 94.1  | 6.46 |
| Q9Y2L1 | Exosome complex exonuclease RRP44 OS=Homo sapiens GN=DIS3 PE=1 SV=2 - [RRP44_HUMAN]                                 | 5.11  | 1 | 3  | 3  | 4   |      |      |      |      |      | 1.02 | 1.05 | 1.01 | 1.05 | 958  | 108.9 | 7.14 |
| Q93063 | Exostosin-2 OS=Homo sapiens GN=EXT2 PE=1 SV=1 - [EXT2_HUMAN]                                                        | 1.39  | 1 | 1  | 1  | 1   | 1.12 | 1.10 | 0.99 | 0.98 |      |      |      |      |      | 718  | 82.2  | 6.55 |
| Q9UBQ6 | Exostosin-like 2 OS=Homo sapiens GN=EXTL2 PE=1 SV=1 - [EXTL2_HUMAN]                                                 | 3.33  | 1 | 1  | 1  | 1   | 1.01 | 1.01 | 1.05 | 1.06 |      |      |      |      |      | 330  | 37.4  | 8.95 |
| O43909 | Exostosin-like 3 OS=Homo sapiens GN=EXTL3 PE=2 SV=1 - [EXTL3_HUMAN]                                                 | 2.18  | 1 | 1  | 2  | 2   | 0.97 | 1.01 | 0.81 | 0.84 |      |      |      |      |      | 919  | 104.7 | 6.51 |
| P55060 | Exportin-2 OS=Homo sapiens GN=CSE1L PE=1 SV=3 - [XPO2_HUMAN]                                                        | 1.75  | 1 | 1  | 1  | 1   | 0.63 | 0.74 | 0.70 | 0.82 |      |      |      |      |      | 971  | 110.3 | 5.77 |
| Q9C0E2 | Exportin-4 OS=Homo sapiens GN=XPO4 PE=1 SV=2 - [XPO4_HUMAN]                                                         | 1.82  | 1 | 1  | 2  | 2   | 0.87 | 1.05 | 0.72 | 0.87 |      |      |      |      |      | 1151 | 130.1 | 5.05 |
| Q96QU8 | Exportin-6 OS=Homo sapiens GN=XPO6 PE=1 SV=1 - [XPO6_HUMAN]                                                         | 0.71  | 1 | 1  | 1  | 1   |      |      |      |      |      | 1.95 | 2.27 | 1.81 | 2.10 | 1125 | 128.8 | 6.35 |
| O43592 | Exportin-T OS=Homo sapiens GN=XPOT PE=1 SV=2 - [XPOT_HUMAN]                                                         | 2.81  | 1 | 2  | 2  | 2   |      |      |      |      |      | 0.85 | 0.84 | 0.81 | 0.80 | 962  | 109.9 | 5.39 |
| Q9BSJ8 | Extended synaptotagmin-1 OS=Homo sapiens GN=ESYT1 PE=1 SV=1 - [ESYT1_HUMAN]                                         | 2.63  | 1 | 2  | 2  | 5   | 0.72 | 0.73 | 0.65 | 0.67 | 1.60 | 1.71 | 1.49 | 1.59 |      | 1104 | 122.8 | 5.83 |
| A0FGR9 | Extended synaptotagmin-3 OS=Homo sapiens GN=ESYT3 PE=2 SV=1 - [ESYT3_HUMAN]                                         | 1.24  | 1 | 1  | 1  | 1   | 1.19 | 0.99 | 1.22 | 1.02 |      |      |      |      |      | 886  | 100.0 | 8.37 |
| Q16610 | Extracellular matrix protein 1 OS=Homo sapiens GN=ECM1 PE=1 SV=2 - [ECM1_HUMAN]                                     | 44.63 | 1 | 19 | 19 | 205 | 1.05 | 1.03 | 1.02 | 1.02 | 0.78 | 0.92 | 0.82 | 0.96 |      | 540  | 60.6  | 6.71 |

|        |                                                                                                |       |   |   |   |    |      |      |      |      |      |      |      |      |      |       |       |      |
|--------|------------------------------------------------------------------------------------------------|-------|---|---|---|----|------|------|------|------|------|------|------|------|------|-------|-------|------|
| Q86XX4 | Extracellular matrix protein FRAS1 OS=Homo sapiens<br>GN=FRAS1 PE=2 SV=1 - [FRAS1_HUMAN]       | 0.87  | 4 | 1 | 2 | 3  |      |      |      |      |      | 1.73 | 1.42 | 1.28 | 1.04 | 4007  | 442.6 | 5.59 |
| Q8IWU6 | Extracellular sulfatase Sulf-1 OS=Homo sapiens GN=SULF1<br>PE=1 SV=1 - [SULF1_HUMAN]           | 2.18  | 1 | 1 | 1 | 2  |      |      |      |      |      | 0.96 | 1.00 | 1.09 | 1.13 | 871   | 101.0 | 9.09 |
| Q8IWU5 | Extracellular sulfatase Sulf-2 OS=Homo sapiens GN=SULF2<br>PE=1 SV=1 - [SULF2_HUMAN]           | 1.49  | 1 | 1 | 1 | 2  |      |      |      |      |      | 1.08 | 1.16 | 1.09 | 1.17 | 870   | 100.4 | 9.17 |
| P08294 | Extracellular superoxide dismutase [Cu-Zn] OS=Homo sapiens<br>GN=SOD3 PE=1 SV=2 - [SODE_HUMAN] | 20.00 | 1 | 4 | 4 | 26 | 0.62 | 0.65 | 0.58 | 0.62 | 0.75 | 0.81 | 0.78 | 0.85 | 240  | 25.8  | 6.61  |      |
| P52907 | F-actin-capping protein subunit alpha-1 OS=Homo sapiens<br>GN=CAPZA1 PE=1 SV=3 - [CAZA1_HUMAN] | 9.09  | 2 | 2 | 2 | 4  | 0.64 | 0.57 | 0.61 | 0.54 |      |      |      |      | 286  | 32.9  | 5.69  |      |
| P47756 | F-actin-capping protein subunit beta OS=Homo sapiens<br>GN=CAPZB PE=1 SV=4 - [CAPZB_HUMAN]     | 5.05  | 1 | 1 | 1 | 2  | 0.69 | 0.78 | 0.71 | 0.80 |      |      |      |      | 277  | 31.3  | 5.59  |      |
| Q86XK2 | F-box only protein 11 OS=Homo sapiens GN=FBXO11 PE=1<br>SV=3 - [FBX11_HUMAN]                   | 1.62  | 1 | 1 | 1 | 1  |      |      |      |      |      | 1.31 | 1.61 | 1.14 | 1.40 | 927   | 103.5 | 6.99 |
| Q96EF6 | F-box only protein 17 OS=Homo sapiens GN=FBXO17 PE=1<br>SV=1 - [FBX17_HUMAN]                   | 8.27  | 1 | 1 | 1 | 1  |      |      |      |      |      | 0.69 | 0.83 | 278  | 31.5 | 8.10  |       |      |
| Q8TCJ0 | F-box only protein 25 OS=Homo sapiens GN=FBXO25 PE=1<br>SV=3 - [FBX25_HUMAN]                   | 4.09  | 1 | 1 | 1 | 2  | 1.01 | 1.00 | 0.97 | 0.96 |      |      |      |      | 367  | 43.3  | 8.09  |      |
| Q9NVF7 | F-box only protein 28 OS=Homo sapiens GN=FBXO28 PE=1<br>SV=1 - [FBX28_HUMAN]                   | 5.98  | 1 | 1 | 1 | 1  | 0.94 | 1.03 | 0.91 | 1.02 |      |      |      |      | 368  | 41.1  | 9.55  |      |
| Q9UK99 | F-box only protein 3 OS=Homo sapiens GN=FBXO3 PE=1<br>SV=3 - [FBX3_HUMAN]                      | 3.61  | 1 | 1 | 1 | 1  | 0.12 | 0.13 | 0.19 | 0.20 |      |      |      |      | 471  | 54.5  | 5.00  |      |
| Q7Z6M2 | F-box only protein 33 OS=Homo sapiens GN=FBXO33 PE=2<br>SV=1 - [FBX33_HUMAN]                   | 2.34  | 1 | 1 | 1 | 1  | 0.54 | 0.58 | 1.17 | 1.28 |      |      |      |      | 555  | 62.6  | 7.36  |      |
| Q9NWN3 | F-box only protein 34 OS=Homo sapiens GN=FBXO34 PE=1<br>SV=2 - [FBX34_HUMAN]                   | 0.84  | 1 | 1 | 1 | 1  | 1.92 | 2.21 | 1.43 | 1.64 |      |      |      |      | 711  | 78.7  | 8.00  |      |
| Q8NEA4 | F-box only protein 36 OS=Homo sapiens GN=FBXO36 PE=2<br>SV=2 - [FBX36_HUMAN]                   | 12.23 | 1 | 1 | 1 | 1  | 0.84 | 0.76 | 0.82 | 0.75 |      |      |      |      | 188  | 22.1  | 8.43  |      |
| Q9UH90 | F-box only protein 40 OS=Homo sapiens GN=FBXO40 PE=1<br>SV=2 - [FBX40_HUMAN]                   | 2.68  | 1 | 1 | 1 | 1  | 1.14 | 1.01 | 0.94 | 0.84 |      |      |      |      | 709  | 79.7  | 7.11  |      |
| Q8TF61 | F-box only protein 41 OS=Homo sapiens GN=FBXO41 PE=2<br>SV=5 - [FBX41_HUMAN]                   | 1.60  | 1 | 1 | 1 | 1  |      |      |      |      | 0.13 | 0.15 | 0.14 | 0.16 | 875  | 94.4  | 8.24  |      |
| Q4G163 | F-box only protein 43 OS=Homo sapiens GN=FBXO43 PE=1<br>SV=3 - [FBX43_HUMAN]                   | 2.54  | 1 | 1 | 1 | 1  | 1.19 | 1.05 | 1.38 | 1.23 |      |      |      |      | 708  | 78.4  | 8.07  |      |
| Q5MNV8 | F-box only protein 47 OS=Homo sapiens GN=FBXO47 PE=2<br>SV=2 - [FBX47_HUMAN]                   | 4.65  | 1 | 1 | 2 | 6  | 0.85 | 0.83 | 0.81 | 0.79 | 0.86 | 0.88 | 0.91 | 0.93 | 452  | 51.9  | 8.35  |      |
| Q9NRD1 | F-box only protein 6 OS=Homo sapiens GN=FBXO6 PE=1<br>SV=1 - [FBX6_HUMAN]                      | 2.05  | 1 | 1 | 1 | 2  |      |      |      |      | 0.71 | 0.44 | 0.97 | 0.60 | 293  | 33.9  | 6.09  |      |
| Q8NEE6 | F-box/LRR-repeat protein 13 OS=Homo sapiens GN=FBXL13<br>PE=2 SV=3 - [FXL13_HUMAN]             | 1.50  | 1 | 1 | 1 | 1  | 2.00 | 1.27 | 1.27 | 0.81 |      |      |      |      | 735  | 83.9  | 8.72  |      |
| Q96ME1 | F-box/LRR-repeat protein 18 OS=Homo sapiens GN=FBXL18<br>PE=2 SV=2 - [FXL18_HUMAN]             | 5.71  | 1 | 2 | 2 | 2  |      |      |      |      | 1.18 | 1.37 | 1.15 | 1.34 | 805  | 88.3  | 8.32  |      |
| Q6P050 | F-box/LRR-repeat protein 22 OS=Homo sapiens GN=FBXL22<br>PE=2 SV=1 - [FXL22_HUMAN]             | 4.56  | 1 | 1 | 1 | 1  | 0.97 | 0.99 | 1.17 | 1.19 |      |      |      |      | 241  | 26.5  | 9.91  |      |
| Q9UKT7 | F-box/LRR-repeat protein 3 OS=Homo sapiens GN=FBXL3<br>PE=1 SV=1 - [FBXL3_HUMAN]               | 2.80  | 1 | 1 | 1 | 1  |      |      |      |      | 1.37 | 1.25 | 1.33 | 1.21 | 428  | 48.7  | 6.89  |      |
| Q9Y297 | F-box/WD repeat-containing protein 1A OS=Homo sapiens<br>GN=BTRC PE=1 SV=1 - [FBW1A_HUMAN]     | 4.63  | 1 | 1 | 1 | 2  |      |      |      |      | 1.38 | 1.71 | 1.13 | 1.41 | 605  | 68.8  | 7.96  |      |
| Q969H0 | F-box/WD repeat-containing protein 7 OS=Homo sapiens<br>GN=FBXW7 PE=1 SV=1 - [FBXW7_HUMAN]     | 1.13  | 1 | 1 | 1 | 2  |      |      |      |      | 1.66 | 1.78 | 1.64 | 1.75 | 707  | 79.6  | 5.80  |      |
| Q5TGI0 | Failed axon connections homolog OS=Homo sapiens<br>GN=FAXC PE=2 SV=2 - [FAXC_HUMAN]            | 3.91  | 1 | 1 | 1 | 2  |      |      |      |      | 0.88 | 0.96 | 1.03 | 1.13 | 409  | 46.8  | 5.57  |      |
| O15360 | Fanconi anemia group A protein OS=Homo sapiens<br>GN=FANCA PE=1 SV=2 - [FANCA_HUMAN]           | 1.79  | 1 | 2 | 2 | 9  | 1.23 | 1.59 | 1.26 | 1.63 | 1.72 | 1.51 | 1.69 | 1.48 | 1455 | 162.7 | 6.60  |      |



|        |                                                                                                 |       |   |   |   |    |      |      |      |      |      |      |      |      |      |       |      |      |      |
|--------|-------------------------------------------------------------------------------------------------|-------|---|---|---|----|------|------|------|------|------|------|------|------|------|-------|------|------|------|
| Q9HB96 | Fanconi anemia group E protein OS=Homo sapiens<br>GN=FANCE PE=1 SV=1 - [FANCE_HUMAN]            | 1.49  | 1 | 1 | 1 | 1  | 0.75 | 0.93 | 0.81 | 1.01 |      | 536  | 58.7 | 5.24 |      |       |      |      |      |
| Q9NP18 | Fanconi anemia group F protein OS=Homo sapiens<br>GN=FANCF PE=1 SV=1 - [FANCF_HUMAN]            | 3.48  | 1 | 1 | 1 | 1  |      |      |      |      | 0.09 | 0.04 | 0.68 | 0.35 | 374  | 42.2  | 8.94 |      |      |
| Q9BX63 | Fanconi anemia group J protein OS=Homo sapiens<br>GN=BRIP1 PE=1 SV=1 - [FANCF_HUMAN]            | 5.12  | 1 | 4 | 4 | 7  | 0.71 | 0.59 | 0.69 | 0.56 | 1.42 | 1.30 | 1.41 | 1.29 | 1249 | 140.8 | 6.92 |      |      |
| Q8IYD8 | Fanconi anemia group M protein OS=Homo sapiens<br>GN=FANCM PE=1 SV=2 - [FANCM_HUMAN]            | 1.71  | 1 | 3 | 3 | 3  | 1.10 | 4.30 | 0.63 | 2.51 | 1.02 | 0.79 | 1.04 | 0.80 | 2048 | 232.0 | 6.11 |      |      |
| Q9UNN5 | FAS-associated factor 1 OS=Homo sapiens GN=FAF1 PE=1<br>SV=2 - [FAF1_HUMAN]                     | 3.54  | 1 | 2 | 2 | 4  |      |      |      |      | 1.07 | 1.07 | 1.10 | 1.10 | 650  | 73.9  | 4.88 |      |      |
| Q8TES7 | Fas-binding factor 1 OS=Homo sapiens GN=FBF1 PE=1 SV=2<br>- [FBF1_HUMAN]                        | 2.29  | 1 | 1 | 1 | 1  |      |      |      |      | 0.99 | 0.77 | 1.01 | 0.78 | 1133 | 125.4 | 7.08 |      |      |
| Q53R41 | FAST kinase domain-containing protein 1 OS=Homo sapiens<br>GN=FASTKD1 PE=1 SV=1 - [FAKD1_HUMAN] | 4.49  | 1 | 2 | 2 | 2  | 0.74 | 0.54 | 1.02 | 0.75 |      |      |      |      | 847  | 97.3  | 7.74 |      |      |
| Q14CZ7 | FAST kinase domain-containing protein 3 OS=Homo sapiens<br>GN=FASTKD3 PE=2 SV=2 - [FAKD3_HUMAN] | 2.27  | 1 | 1 | 1 | 1  |      |      |      |      | 0.82 | 0.94 | 1.00 | 1.15 | 662  | 75.6  | 8.29 |      |      |
| P49327 | Fatty acid synthase OS=Homo sapiens GN=FASN PE=1 SV=3<br>- [FAS_HUMAN]                          | 1.35  | 1 | 2 | 2 | 2  | 1.03 | 1.05 | 0.62 | 0.63 | 0.52 | 0.52 | 0.59 | 0.58 | 2511 | 273.3 | 6.44 |      |      |
| Q01469 | Fatty acid-binding protein, epidermal OS=Homo sapiens<br>GN=FABP5 PE=1 SV=3 - [FABP5_HUMAN]     | 30.37 | 2 | 3 | 3 | 8  |      |      |      |      | 0.93 | 0.63 | 1.00 | 0.92 | 135  | 15.2  | 7.01 |      |      |
| P05413 | Fatty acid-binding protein, heart OS=Homo sapiens<br>GN=FABP3 PE=1 SV=4 - [FABPH_HUMAN]         | 6.77  | 1 | 1 | 1 | 3  |      |      |      |      | 1.10 | 1.11 | 1.16 | 1.18 | 133  | 14.8  | 6.80 |      |      |
| P12104 | Fatty acid-binding protein, intestinal OS=Homo sapiens<br>GN=FABP2 PE=1 SV=2 - [FABPI_HUMAN]    | 17.42 | 1 | 1 | 1 | 2  | 0.70 | 0.83 | 0.94 | 1.13 |      |      |      |      | 132  | 15.2  | 7.24 |      |      |
| P07148 | Fatty acid-binding protein, liver OS=Homo sapiens GN=FABP1<br>PE=1 SV=1 - [FABPL_HUMAN]         | 7.87  | 1 | 1 | 1 | 4  |      |      |      |      | 1.13 | 1.06 | 0.99 | 0.92 | 127  | 14.2  | 7.18 |      |      |
| Q96K12 | Fatty acyl-CoA reductase 2 OS=Homo sapiens GN=FAAR2<br>PE=2 SV=1 - [FACR2_HUMAN]                | 1.55  | 1 | 1 | 1 | 2  | 1.39 | 1.34 | 1.28 | 1.24 |      |      |      |      | 515  | 59.4  | 9.38 |      |      |
| Q6GMR7 | Fatty-acid amide hydrolase 2 OS=Homo sapiens GN=FAAH2<br>PE=2 SV=1 - [FAAH2_HUMAN]              | 3.76  | 1 | 1 | 1 | 1  |      |      |      |      | 1.89 | 1.85 | 3.46 | 3.40 | 532  | 58.3  | 9.07 |      |      |
| Q96PJ5 | Fc receptor-like protein 4 OS=Homo sapiens GN=FCRL4<br>PE=1 SV=1 - [FCRL4_HUMAN]                | 2.91  | 1 | 1 | 1 | 1  | 0.96 | 0.62 | 1.04 | 0.66 |      |      |      |      | 515  | 57.2  | 6.52 |      |      |
| Q96RD9 | Fc receptor-like protein 5 OS=Homo sapiens GN=FCRL5<br>PE=1 SV=3 - [FCRL5_HUMAN]                | 4.30  | 1 | 3 | 3 | 6  | 1.15 | 1.29 | 1.25 | 1.40 | 0.89 | 0.95 | 0.95 | 1.05 | 977  | 106.4 | 7.14 |      |      |
| Q86WN1 | FCH and double SH3 domains protein 1 OS=Homo sapiens<br>GN=FCHSD1 PE=1 SV=1 - [FCSD1_HUMAN]     | 5.07  | 1 | 1 | 1 | 5  | 2.14 | 1.59 | 1.49 | 1.10 |      |      |      |      | 690  | 76.9  | 5.34 |      |      |
| A9Z1Z3 | Fer-1-like protein 4 OS=Homo sapiens GN=FER1L4 PE=2<br>SV=1 - [FR1L4_HUMAN]                     | 0.72  | 1 | 1 | 1 | 2  | 0.70 | 0.64 | 0.70 | 0.65 |      |      |      |      | 1794 | 200.9 | 6.24 |      |      |
| A0AVI2 | Fer-1-like protein 5 OS=Homo sapiens GN=FER1L5 PE=2<br>SV=2 - [FR1L5_HUMAN]                     | 0.76  | 1 | 1 | 1 | 6  | 0.56 | 0.53 | 0.60 | 0.57 | 0.54 | 0.49 | 0.54 | 0.49 | 2093 | 241.8 | 7.96 |      |      |
| Q2WJ9  | Fer-1-like protein 6 OS=Homo sapiens GN=FER1L6 PE=2<br>SV=2 - [FR1L6_HUMAN]                     | 1.51  | 1 | 2 | 2 | 2  |      |      |      |      | 1.27 | 1.46 | 1.11 | 1.27 | 1857 | 209.2 | 6.38 |      |      |
| Q5SYB0 | FERM and PDZ domain-containing protein 1 OS=Homo<br>sapiens GN=FRMPD1 PE=1 SV=1 - [FRPD1_HUMAN] | 0.44  | 1 | 1 | 1 | 4  | 1.87 | 1.80 | 1.73 | 1.71 |      |      |      |      | 1578 | 173.3 | 5.25 |      |      |
| Q68DX3 | FERM and PDZ domain-containing protein 2 OS=Homo<br>sapiens GN=FRMPD2 PE=1 SV=3 - [FRPD2_HUMAN] | 1.45  | 1 | 1 | 1 | 1  | 0.92 | 0.97 | 0.93 | 0.98 |      |      |      |      | 1309 | 144.2 | 6.74 |      |      |
| Q5JV73 | FERM and PDZ domain-containing protein 3 OS=Homo<br>sapiens GN=FRMPD3 PE=2 SV=2 - [FRPD3_HUMAN] | 2.04  | 1 | 2 | 3 | 17 | 1.08 | 0.78 | 0.84 | 0.65 | 1.19 | 1.27 | 1.36 | 1.35 | 1810 | 199.1 | 8.15 |      |      |
| Q14CM0 | FERM and PDZ domain-containing protein 4 OS=Homo<br>sapiens GN=FRMPD4 PE=1 SV=1 - [FRPD4_HUMAN] | 3.86  | 1 | 2 | 2 | 2  | 1.19 | 1.30 | 1.19 | 1.30 |      |      |      |      | 1322 | 144.3 | 5.25 |      |      |
| Q9BQL6 | Fermitin family homolog 1 OS=Homo sapiens GN=FERMT1<br>PE=1 SV=1 - [FERM1_HUMAN]                | 1.92  | 1 | 1 | 1 | 1  |      |      |      |      | 0.48 | 0.53 | 0.48 | 0.53 | 677  | 77.4  | 6.28 |      |      |
| Q96AC1 | Fermitin family homolog 2 OS=Homo sapiens GN=FERMT2<br>PE=1 SV=1 - [FERM2_HUMAN]                | 5.59  | 1 | 2 | 2 | 3  |      |      |      |      | 1.05 | 1.03 | 1.27 | 0.83 | 1.15 | 0.76  | 680  | 77.8 | 6.70 |

|        |                                                                                                            |       |   |     |     |      |      |      |      |      |      |      |      |      |      |       |       |
|--------|------------------------------------------------------------------------------------------------------------|-------|---|-----|-----|------|------|------|------|------|------|------|------|------|------|-------|-------|
| Q86UX7 | Fermitin family homolog 3 OS=Homo sapiens GN=FERMT3 PE=1 SV=1 - [URP2_HUMAN]                               | 29.39 | 1 | 13  | 13  | 44   | 0.67 | 0.67 | 0.68 | 0.68 | 0.96 | 1.01 | 0.87 | 0.92 | 667  | 75.9  | 6.98  |
| Q6ZNA5 | Ferric-chelate reductase 1 OS=Homo sapiens GN=FRRS1 PE=2 SV=2 - [FRRS1_HUMAN]                              | 3.72  | 1 | 1   | 1   | 1    |      |      |      |      | 0.77 | 0.75 | 0.64 | 0.63 | 592  | 66.1  | 7.47  |
| Q9UGM5 | Fetuin-B OS=Homo sapiens GN=FETUB PE=1 SV=2 - [FETUB_HUMAN]                                                | 48.69 | 1 | 13  | 13  | 84   | 1.45 | 1.46 | 1.45 | 1.47 | 1.16 | 1.43 | 1.03 | 1.25 | 382  | 42.0  | 6.83  |
| Q9Y613 | FH1/FH2 domain-containing protein 1 OS=Homo sapiens GN=FHOD1 PE=1 SV=3 - [FHOD1_HUMAN]                     | 1.29  | 1 | 1   | 1   | 2    | 0.55 | 0.54 | 0.56 | 0.55 |      |      |      |      | 1164 | 126.5 | 6.39  |
| Q2V2M9 | FH1/FH2 domain-containing protein 3 OS=Homo sapiens GN=FHOD3 PE=1 SV=2 - [FHOD3_HUMAN]                     | 1.05  | 9 | 1   | 2   | 2    | 0.97 | 0.68 | 1.15 | 0.81 |      |      |      |      | 1422 | 158.5 | 5.99  |
| Q9C0D6 | FH2 domain-containing protein 1 OS=Homo sapiens GN=FHDC1 PE=2 SV=2 - [FHDC1_HUMAN]                         | 1.57  | 1 | 1   | 1   | 1    |      |      |      |      | 1.13 | 1.20 | 0.91 | 0.96 | 1143 | 124.7 | 9.03  |
| P35555 | Fibrillin-1 OS=Homo sapiens GN=FBN1 PE=1 SV=3 - [FBN1_HUMAN]                                               | 12.92 | 1 | 27  | 29  | 60   | 0.98 | 0.90 | 0.91 | 0.85 | 1.04 | 0.83 | 0.83 | 0.67 | 2871 | 312.0 | 4.93  |
| P35556 | Fibrillin-2 OS=Homo sapiens GN=FBN2 PE=1 SV=3 - [FBN2_HUMAN]                                               | 1.65  | 1 | 2   | 4   | 5    | 1.12 | 0.65 | 0.84 | 0.57 |      |      |      |      | 2912 | 314.6 | 4.86  |
| Q75N90 | Fibrillin-3 OS=Homo sapiens GN=FBN3 PE=2 SV=3 - [FBN3_HUMAN]                                               | 0.64  | 1 | 2   | 2   | 3    | 1.15 | 1.19 | 1.03 | 1.07 |      |      |      |      | 2809 | 300.1 | 5.07  |
| P02671 | Fibrinogen alpha chain OS=Homo sapiens GN=FGA PE=1 SV=2 - [FIBA_HUMAN]                                     | 48.85 | 1 | 42  | 42  | 1773 | 0.68 | 0.66 | 0.66 | 0.65 | 0.86 | 0.87 | 0.91 | 0.92 | 866  | 94.9  | 6.01  |
| P02675 | Fibrinogen beta chain OS=Homo sapiens GN=FGB PE=1 SV=2 - [FIBB_HUMAN]                                      | 63.34 | 1 | 27  | 27  | 591  | 0.32 | 0.30 | 0.30 | 0.27 | 0.32 | 0.36 | 0.34 | 0.38 | 491  | 55.9  | 8.27  |
| Q8N539 | Fibrinogen C domain-containing protein 1 OS=Homo sapiens GN=FIBCD1 PE=1 SV=2 - [FIBCD1_HUMAN]              | 4.12  | 1 | 1   | 1   | 2    | 0.86 | 0.72 | 0.97 | 0.81 |      |      |      |      | 461  | 50.7  | 6.48  |
| P02679 | Fibrinogen gamma chain OS=Homo sapiens GN=FGG PE=1 SV=3 - [FIBG_HUMAN]                                     | 60.26 | 1 | 26  | 26  | 361  | 0.63 | 0.57 | 0.64 | 0.57 | 0.27 | 0.28 | 0.23 | 0.25 | 453  | 51.5  | 5.62  |
| O95073 | Fibrinogen silencer-binding protein OS=Homo sapiens GN=FSBP PE=1 SV=1 - [FSBP_HUMAN]                       | 3.68  | 1 | 1   | 1   | 1    |      |      |      |      | 0.70 | 0.50 | 0.52 | 0.37 | 299  | 34.7  | 7.12  |
| P61328 | Fibroblast growth factor 12 OS=Homo sapiens GN=FGF12 PE=1 SV=1 - [FGF12_HUMAN]                             | 7.82  | 1 | 3   | 3   | 3    |      |      |      |      | 0.98 | 0.85 | 0.89 | 0.79 | 243  | 27.4  | 9.96  |
| O60258 | Fibroblast growth factor 17 OS=Homo sapiens GN=FGF17 PE=1 SV=1 - [FGF17_HUMAN]                             | 3.70  | 1 | 1   | 1   | 1    | 1.35 | 0.78 | 1.06 | 0.62 |      |      |      |      | 216  | 24.9  | 10.42 |
| Q9NP95 | Fibroblast growth factor 20 OS=Homo sapiens GN=FGF20 PE=1 SV=1 - [FGF20_HUMAN]                             | 2.84  | 1 | 1   | 1   | 2    |      |      |      |      | 1.04 | 1.37 | 0.75 | 0.98 | 211  | 23.5  | 8.76  |
| P11362 | Fibroblast growth factor receptor 1 OS=Homo sapiens GN=FGFR1 PE=1 SV=3 - [FGFR1_HUMAN]                     | 3.89  | 1 | 3   | 3   | 5    | 0.88 | 1.01 | 0.98 | 1.02 |      |      |      |      | 822  | 91.8  | 6.21  |
| Q9BYJ0 | Fibroblast growth factor-binding protein 2 OS=Homo sapiens GN=FGFBP2 PE=1 SV=1 - [FGFBP2_HUMAN]            | 7.17  | 1 | 1   | 1   | 3    |      |      |      |      | 1.00 | 1.15 | 0.89 | 1.02 | 223  | 24.6  | 8.87  |
| P08F94 | Fibrocystin OS=Homo sapiens GN=PKHD1 PE=1 SV=1 - [PKHD1_HUMAN]                                             | 0.74  | 1 | 1   | 1   | 1    | 1.15 | 0.44 | 1.36 | 0.52 |      |      |      |      | 4074 | 446.4 | 6.57  |
| Q86W11 | Fibrocystin-L OS=Homo sapiens GN=PKHD1L1 PE=2 SV=2 - [PKHL1_HUMAN]                                         | 1.70  | 1 | 4   | 4   | 6    | 0.95 | 0.88 | 0.94 | 1.03 |      |      |      |      | 4243 | 465.4 | 6.11  |
| P02751 | Fibronectin OS=Homo sapiens GN=FN1 PE=1 SV=4 - [FINC_HUMAN]                                                | 57.84 | 1 | 115 | 115 | 4463 | 1.13 | 1.15 | 1.14 | 1.18 | 0.99 | 0.99 | 1.01 | 1.00 | 2386 | 262.5 | 5.71  |
| Q8TC84 | Fibronectin type 3 and ankyrin repeat domains protein 1 OS=Homo sapiens GN=FANK1 PE=2 SV=3 - [FANK1_HUMAN] | 3.48  | 1 | 1   | 1   | 1    |      |      |      |      | 0.93 | 0.89 | 0.90 | 0.87 | 345  | 38.3  | 8.73  |
| Q9BTV5 | Fibronectin type III and SPRY domain-containing protein 1 OS=Homo sapiens GN=FSD1 PE=1 SV=1 - [FSD1_HUMAN] | 2.62  | 1 | 2   | 2   | 16   |      |      |      |      | 1.02 | 0.94 | 0.94 | 0.93 | 496  | 55.8  | 6.99  |
| Q4ZHG4 | Fibronectin type III domain-containing protein 1 OS=Homo sapiens GN=FNDC1 PE=1 SV=4 - [FNDC1_HUMAN]        | 1.43  | 1 | 2   | 2   | 3    | 1.13 | 1.08 | 1.39 | 1.34 | 1.19 | 1.10 | 1.10 | 1.02 | 1894 | 205.4 | 9.32  |
| Q5CZC0 | Fibrous sheath-interacting protein 2 OS=Homo sapiens GN=FSIP2 PE=1 SV=4 - [FSIP2_HUMAN]                    | 1.13  | 1 | 5   | 6   | 6    | 0.98 | 0.83 | 1.05 | 0.90 | 0.37 | 0.64 | 0.71 | 1.23 | 6907 | 780.1 | 6.71  |
| P23142 | Fibulin-1 OS=Homo sapiens GN=FBLN1 PE=1 SV=4 - [FBLN1_HUMAN]                                               | 47.94 | 1 | 23  | 23  | 190  | 1.07 | 1.01 | 1.06 | 1.02 | 0.90 | 0.89 | 1.05 | 0.96 | 703  | 77.2  | 5.22  |

|        |                                                                                              |       |   |    |    |     |      |      |      |      |      |      |      |      |      |       |      |
|--------|----------------------------------------------------------------------------------------------|-------|---|----|----|-----|------|------|------|------|------|------|------|------|------|-------|------|
| Q9UBX5 | Fibulin-5 OS=Homo sapiens GN=FBLN5 PE=1 SV=1 - [FBLN5_HUMAN]                                 | 10.71 | 1 | 4  | 4  | 10  | 1.13 | 1.06 | 1.17 | 1.10 | 1.24 | 1.27 | 1.24 | 1.28 | 448  | 50.1  | 4.73 |
| O00602 | Ficolin-1 OS=Homo sapiens GN=FCN1 PE=1 SV=2 - [FCN1_HUMAN]                                   | 14.42 | 1 | 3  | 3  | 8   | 1.08 | 1.06 | 1.13 | 1.11 | 1.06 | 1.20 | 1.24 | 1.39 | 326  | 35.1  | 6.86 |
| Q15485 | Ficolin-2 OS=Homo sapiens GN=FCN2 PE=1 SV=2 - [FCN2_HUMAN]                                   | 14.70 | 1 | 3  | 3  | 44  | 1.07 | 0.94 | 1.08 | 0.93 | 0.88 | 0.84 | 0.87 | 0.85 | 313  | 34.0  | 6.77 |
| O75636 | Ficolin-3 OS=Homo sapiens GN=FCN3 PE=1 SV=2 - [FCN3_HUMAN]                                   | 56.86 | 2 | 12 | 13 | 135 | 1.10 | 1.15 | 1.14 | 1.21 | 1.00 | 1.09 | 0.99 | 1.09 | 299  | 32.9  | 6.67 |
| Q6PIW4 | Fidgetin-like protein 1 OS=Homo sapiens GN=FIGNL1 PE=1 SV=2 - [FIGL1_HUMAN]                  | 1.63  | 1 | 1  | 1  | 1   |      |      |      |      | 1.22 | 0.94 | 0.98 | 0.75 | 674  | 74.0  | 7.85 |
| P20930 | Filaggrin OS=Homo sapiens GN=FLG PE=1 SV=3 - [FLA_HUMAN]                                     | 3.94  | 1 | 2  | 2  | 2   | 0.63 | 0.77 | 0.84 | 1.03 | 1.07 | 0.71 | 1.42 | 0.94 | 4061 | 434.9 | 9.25 |
| Q5D862 | Filaggrin-2 OS=Homo sapiens GN=FLG2 PE=1 SV=1 - [FLA2_HUMAN]                                 | 2.05  | 1 | 2  | 2  | 5   | 0.72 | 0.81 | 0.50 | 0.59 |      |      |      |      | 2391 | 247.9 | 8.31 |
| Q4L180 | Filamin A-interacting protein 1-like OS=Homo sapiens GN=FILIP1L PE=1 SV=2 - [FIL1L_HUMAN]    | 1.15  | 1 | 1  | 1  | 1   |      |      |      |      | 0.97 | 0.42 | 0.97 | 0.42 | 1135 | 130.3 | 6.57 |
| P21333 | Filamin-A OS=Homo sapiens GN=FLNA PE=1 SV=4 - [FLNA_HUMAN]                                   | 38.87 | 2 | 72 | 77 | 446 | 0.79 | 0.78 | 0.79 | 0.78 | 1.08 | 1.02 | 1.06 | 1.06 | 2647 | 280.6 | 6.06 |
| O75369 | Filamin-B OS=Homo sapiens GN=FLNB PE=1 SV=2 - [FLNB_HUMAN]                                   | 3.42  | 1 | 2  | 7  | 18  | 0.92 | 0.93 | 1.23 | 1.24 |      |      |      |      | 2602 | 278.0 | 5.73 |
| Q9UM11 | Fizzy-related protein homolog OS=Homo sapiens GN=FZR1 PE=1 SV=2 - [FZR_HUMAN]                | 8.06  | 1 | 2  | 2  | 6   | 1.19 | 1.33 | 1.25 | 1.40 | 1.02 | 0.83 | 1.14 | 0.93 | 496  | 55.1  | 9.33 |
| Q9UIM3 | FK506-binding protein-like OS=Homo sapiens GN=FKBP1 PE=1 SV=1 - [FKBP1_HUMAN]                | 8.02  | 1 | 1  | 1  | 2   | 0.32 | 0.33 | 0.43 | 0.45 |      |      |      |      | 349  | 38.2  | 5.50 |
| Q17RS7 | Flap endonuclease GEN homolog 1 OS=Homo sapiens GN=GEN1 PE=1 SV=2 - [GEN_HUMAN]              | 1.10  | 1 | 1  | 1  | 1   |      |      |      |      | 0.66 | 7.72 | 1.10 | #### | 908  | 102.8 | 7.81 |
| P30043 | Flavin reductase (NADPH) OS=Homo sapiens GN=BLVRB PE=1 SV=3 - [BLVRB_HUMAN]                  | 30.58 | 1 | 5  | 5  | 25  | 0.61 | 0.59 | 0.64 | 0.64 | 0.60 | 0.63 | 0.62 | 0.65 | 206  | 22.1  | 7.65 |
| Q14254 | Flotillin-2 OS=Homo sapiens GN=FLOT2 PE=1 SV=2 - [FLOT2_HUMAN]                               | 1.40  | 1 | 1  | 1  | 1   | 2.63 | 3.08 | 2.39 | 2.80 |      |      |      |      | 428  | 47.0  | 5.25 |
| P41439 | Folate receptor gamma OS=Homo sapiens GN=FOLR3 PE=1 SV=1 - [FOLR3_HUMAN]                     | 7.82  | 1 | 2  | 2  | 4   | 0.98 | 1.12 | 0.90 | 1.03 | 1.37 | 1.39 | 1.01 | 1.26 | 243  | 27.6  | 7.83 |
| Q53S99 | Folate transporter-like protein C2orf83 OS=Homo sapiens GN=C2orf83 PE=2 SV=1 - [CB083_HUMAN] | 15.33 | 1 | 1  | 1  | 1   | 1.85 | 1.43 | 1.86 | 1.45 |      |      |      |      | 150  | 16.4  | 6.67 |
| P23945 | Follicle-stimulating hormone receptor OS=Homo sapiens GN=FSHR PE=1 SV=3 - [FSHR_HUMAN]       | 1.58  | 1 | 1  | 1  | 2   | 8.37 | 4.23 | 1.89 | 0.96 |      |      |      |      | 695  | 78.2  | 7.18 |
| Q9P278 | Folliculin-interacting protein 2 OS=Homo sapiens GN=FNIP2 PE=1 SV=2 - [FNIP2_HUMAN]          | 1.53  | 1 | 2  | 2  | 4   | 1.79 | 1.81 | 1.78 | 1.80 | 0.87 | 1.05 | 0.73 | 1.03 | 1114 | 122.0 | 6.62 |
| Q12841 | Follistatin-related protein 1 OS=Homo sapiens GN=FSTL1 PE=1 SV=1 - [FSTL1_HUMAN]             | 2.60  | 1 | 1  | 1  | 2   | 2.28 | 2.23 | 1.49 | 1.47 |      |      |      |      | 308  | 35.0  | 5.52 |
| Q6MZW2 | Follistatin-related protein 4 OS=Homo sapiens GN=FSTL4 PE=2 SV=3 - [FSTL4_HUMAN]             | 0.83  | 1 | 1  | 1  | 1   | 1.88 | 2.18 | 0.93 | 1.08 |      |      |      |      | 842  | 93.0  | 6.32 |
| Q9UJU5 | Forkhead box protein D3 OS=Homo sapiens GN=FOXD3 PE=1 SV=1 - [FOXD3_HUMAN]                   | 2.72  | 1 | 1  | 1  | 2   |      |      |      |      | 0.74 | 1.04 | 0.85 | 1.18 | 478  | 47.6  | 6.46 |
| Q9NU39 | Forkhead box protein D4-like 1 OS=Homo sapiens GN=FOXD4L1 PE=2 SV=1 - [FX4L1_HUMAN]          | 6.86  | 1 | 1  | 1  | 1   | 1.10 | 1.27 | 1.28 | 1.48 |      |      |      |      | 408  | 43.6  | 9.29 |
| Q9UPW0 | Forkhead box protein J3 OS=Homo sapiens GN=FOXJ3 PE=1 SV=2 - [FOXJ3_HUMAN]                   | 1.77  | 1 | 1  | 1  | 1   | 0.99 | 0.89 | 0.98 | 0.88 |      |      |      |      | 622  | 68.9  | 7.09 |
| P85037 | Forkhead box protein K1 OS=Homo sapiens GN=FO XK1 PE=1 SV=1 - [FO XK1_HUMAN]                 | 3.27  | 1 | 1  | 1  | 1   | 0.74 | 0.67 | 0.77 | 0.71 |      |      |      |      | 733  | 75.4  | 9.32 |
| Q9H334 | Forkhead box protein P1 OS=Homo sapiens GN=FOXP1 PE=1 SV=1 - [FOXP1_HUMAN]                   | 1.92  | 1 | 1  | 1  | 1   |      |      |      |      | 1.19 | 1.22 | 1.33 | 1.36 | 677  | 75.3  | 6.67 |
| O43638 | Forkhead box protein S1 OS=Homo sapiens GN=FOXS1 PE=2 SV=2 - [FOXS1_HUMAN]                   | 8.18  | 1 | 1  | 1  | 1   |      |      |      |      | 0.83 | 0.85 | 1.01 | 1.03 | 330  | 35.4  | 9.07 |

|        |                                                                                                            |       |   |    |    |    |      |      |      |      |      |      |      |      |      |       |      |      |       |      |
|--------|------------------------------------------------------------------------------------------------------------|-------|---|----|----|----|------|------|------|------|------|------|------|------|------|-------|------|------|-------|------|
| Q8N3X1 | Formin-binding protein 4 OS=Homo sapiens GN=FBNP4 PE=1 SV=3 - [FBNP4_HUMAN]                                | 0.49  | 1 | 1  | 1  | 2  |      |      |      |      |      |      |      | #### | ###  | 8.60  | 8.49 | 1017 | 110.2 | 4.74 |
| O95466 | Formin-like protein 1 OS=Homo sapiens GN=FMNL1 PE=1 SV=3 - [FMNL_HUMAN]                                    | 2.45  | 1 | 2  | 2  | 2  | 1.21 | 1.20 | 1.07 | 1.06 | 1.39 | 1.55 | 0.99 | 1.11 | 1100 | 121.8 | 5.72 |      |       |      |
| Q13642 | Four and a half LIM domains protein 1 OS=Homo sapiens GN=FHL1 PE=1 SV=4 - [FHL1_HUMAN]                     | 13.62 | 1 | 4  | 4  | 10 | 0.80 | 0.93 | 0.85 | 1.00 | 1.42 | 1.40 | 1.30 | 1.29 | 323  | 36.2  | 8.97 |      |       |      |
| P78423 | Fractalkine OS=Homo sapiens GN=CX3CL1 PE=1 SV=1 - [CX3CL1_HUMAN]                                           | 12.09 | 1 | 2  | 2  | 4  |      |      |      |      | 1.04 | 0.24 | 1.43 | 0.09 | 397  | 42.2  | 6.52 |      |       |      |
| Q5SZK8 | FRAS1-related extracellular matrix protein 2 OS=Homo sapiens GN=FREM2 PE=1 SV=2 - [FREM2_HUMAN]            | 0.92  | 1 | 2  | 2  | 2  | 1.68 | 1.42 | 1.97 | 1.67 |      |      |      |      | 3169 | 350.9 | 5.03 |      |       |      |
| P0C091 | FRAS1-related extracellular matrix protein 3 OS=Homo sapiens GN=FREM3 PE=2 SV=2 - [FREM3_HUMAN]            | 0.51  | 1 | 1  | 1  | 6  | 1.49 | 0.82 | 1.75 | 1.07 | 1.12 | 1.23 | 0.87 | 0.97 | 2139 | 238.0 | 5.33 |      |       |      |
| Q16595 | Frataxin, mitochondrial OS=Homo sapiens GN=FXN PE=1 SV=2 - [FRDA_HUMAN]                                    | 9.05  | 1 | 1  | 1  | 1  |      |      |      |      | 0.46 | 0.49 | 0.48 | 0.52 | 210  | 23.1  | 8.69 |      |       |      |
| Q9UP38 | Frizzled-1 OS=Homo sapiens GN=FZD1 PE=1 SV=2 - [FZD1_HUMAN]                                                | 6.96  | 1 | 3  | 3  | 3  |      |      |      |      | 0.61 | 0.18 | 0.81 | 0.24 | 647  | 71.1  | 7.99 |      |       |      |
| Q9NPG1 | Frizzled-3 OS=Homo sapiens GN=FZD3 PE=1 SV=1 - [FZD3_HUMAN]                                                | 2.10  | 1 | 1  | 1  | 1  | 0.83 | 1.01 | 0.73 | 0.89 |      |      |      |      | 666  | 76.2  | 7.74 |      |       |      |
| Q13467 | Frizzled-5 OS=Homo sapiens GN=FZD5 PE=2 SV=2 - [FZD5_HUMAN]                                                | 1.20  | 1 | 1  | 1  | 2  |      |      |      |      | 0.69 | 0.67 | 0.73 | 0.70 | 585  | 64.5  | 8.29 |      |       |      |
| P09467 | Fructose-1,6-bisphosphatase 1 OS=Homo sapiens GN=FBP1 PE=1 SV=5 - [F16P1_HUMAN]                            | 7.40  | 2 | 2  | 2  | 3  | 0.68 | 0.66 | 0.73 | 0.72 | 0.72 | 0.88 | 0.56 | 0.69 | 338  | 36.8  | 6.99 |      |       |      |
| P04075 | Fructose-bisphosphate aldolase A OS=Homo sapiens GN=ALDOA PE=1 SV=2 - [ALDOA_HUMAN]                        | 40.38 | 1 | 11 | 11 | 43 | 0.75 | 0.75 | 0.78 | 0.79 | 0.77 | 0.78 | 0.70 | 0.71 | 364  | 39.4  | 8.09 |      |       |      |
| P05062 | Fructose-bisphosphate aldolase B OS=Homo sapiens GN=ALDOB PE=1 SV=2 - [ALDOB_HUMAN]                        | 20.88 | 1 | 6  | 6  | 12 | 0.72 | 0.74 | 0.72 | 0.70 | 0.72 | 0.70 | 0.69 | 0.67 | 364  | 39.4  | 7.87 |      |       |      |
| P16930 | Fumarylacetoacetase OS=Homo sapiens GN=FAH PE=1 SV=2 - [FAAH_HUMAN]                                        | 8.59  | 1 | 3  | 3  | 10 | 0.89 | 0.87 | 0.91 | 0.90 | 0.78 | 0.82 | 0.76 | 0.80 | 419  | 46.3  | 6.95 |      |       |      |
| P09958 | Furin OS=Homo sapiens GN=FURIN PE=1 SV=2 - [FURIN_HUMAN]                                                   | 0.63  | 1 | 1  | 1  | 1  |      |      |      |      | 0.14 | 0.97 | 0.27 | 1.88 | 794  | 86.6  | 6.47 |      |       |      |
| Q9H0Q3 | FXRD domain-containing ion transport regulator 6 OS=Homo sapiens GN=FXRD6 PE=2 SV=1 - [FXRD6_HUMAN]        | 24.21 | 1 | 1  | 1  | 1  | 0.71 | 0.59 | 0.83 | 0.70 |      |      |      |      | 95   | 10.5  | 5.10 |      |       |      |
| O15117 | FYN-binding protein OS=Homo sapiens GN=FYB PE=1 SV=2 - [FYB_HUMAN]                                         | 9.83  | 1 | 6  | 6  | 13 | 1.60 | 1.70 | 1.61 | 1.72 | 1.30 | 1.27 | 1.14 | 1.12 | 783  | 85.3  | 6.48 |      |       |      |
| Q9BQS8 | FYVE and coiled-coil domain-containing protein 1 OS=Homo sapiens GN=FYCO1 PE=1 SV=3 - [FYCO1_HUMAN]        | 1.01  | 1 | 1  | 1  | 2  |      |      |      |      | 0.77 | 0.71 | 0.95 | 0.88 | 1478 | 166.9 | 4.92 |      |       |      |
| Q6ZNL6 | FYVE, RhoGEF and PH domain-containing protein 5 OS=Homo sapiens GN=FGD5 PE=1 SV=3 - [FGD5_HUMAN]           | 2.12  | 1 | 1  | 1  | 1  | 1.11 | 1.13 | 1.08 | 1.10 |      |      |      |      | 1462 | 159.8 | 5.01 |      |       |      |
| Q6ZV73 | FYVE, RhoGEF and PH domain-containing protein 6 OS=Homo sapiens GN=FGD6 PE=1 SV=2 - [FGD6_HUMAN]           | 1.19  | 1 | 1  | 1  | 1  |      |      |      |      | 0.99 | 0.04 | 0.77 | 0.03 | 1430 | 160.7 | 7.03 |      |       |      |
| O75459 | G antigen family B member 1 OS=Homo sapiens GN=PAGE1 PE=1 SV=2 - [GAGB1_HUMAN]                             | 23.97 | 1 | 2  | 2  | 3  |      |      |      |      | 1.15 | 0.89 | 1.16 | 0.90 | 146  | 16.1  | 4.22 |      |       |      |
| Q8WTP9 | G antigen family D member 4 OS=Homo sapiens GN=XAGE3 PE=2 SV=1 - [GAGD4_HUMAN]                             | 9.91  | 1 | 1  | 1  | 1  |      |      |      |      | 0.50 |      | 1.29 | 111  | 12.3 | 4.49  |      |      |       |      |
| Q9NW75 | G patch domain-containing protein 2 OS=Homo sapiens GN=GPATCH2 PE=1 SV=1 - [GPTC2_HUMAN]                   | 2.46  | 1 | 1  | 1  | 3  |      |      |      |      | 1.34 | 1.47 | 0.82 | 1.06 | 528  | 58.9  | 9.09 |      |       |      |
| P48549 | G protein-activated inward rectifier potassium channel 1 OS=Homo sapiens GN=KCNJ3 PE=1 SV=1 - [IRK3_HUMAN] | 3.19  | 1 | 2  | 2  | 4  | 1.18 | 1.23 | 1.21 | 1.27 | 0.79 | 0.73 | 0.76 | 0.70 | 501  | 56.6  | 8.22 |      |       |      |
| P48051 | G protein-activated inward rectifier potassium channel 2 OS=Homo sapiens GN=KCNJ6 PE=1 SV=1 - [IRK6_HUMAN] | 3.07  | 1 | 1  | 1  | 2  |      |      |      |      | 0.04 | 0.06 |      |      | 423  | 48.4  | 5.38 |      |       |      |
| P43250 | G protein-coupled receptor kinase 6 OS=Homo sapiens GN=GRK6 PE=1 SV=2 - [GRK6_HUMAN]                       | 2.95  | 1 | 1  | 1  | 1  | 1.76 | 1.18 | 1.07 | 0.73 |      |      |      |      | 576  | 65.9  | 8.00 |      |       |      |
| Q8WTQ7 | G protein-coupled receptor kinase 7 OS=Homo sapiens GN=GRK7 PE=1 SV=1 - [GRK7_HUMAN]                       | 3.62  | 1 | 1  | 1  | 2  |      |      |      |      | 0.96 | 1.30 | 1.13 | 1.53 | 553  | 62.2  | 6.57 |      |       |      |

|        |                                                                                                                         |       |   |    |    |     |      |      |      |      |      |      |      |      |      |      |       |      |
|--------|-------------------------------------------------------------------------------------------------------------------------|-------|---|----|----|-----|------|------|------|------|------|------|------|------|------|------|-------|------|
| Q7Z2K8 | G protein-regulated inducer of neurite outgrowth 1 OS=Homo sapiens GN=GPRIN1 PE=1 SV=2 - [GRIN1_HUMAN]                  | 1.59  | 1 | 1  | 1  | 1   |      |      |      |      |      | 0.69 | 1.17 | 1.17 | 1.97 | 1008 | 102.3 | 8.06 |
| Q96PE1 | G-protein coupled receptor 124 OS=Homo sapiens GN=GPR124 PE=1 SV=2 - [GP124_HUMAN]                                      | 2.09  | 1 | 1  | 1  | 1   | 0.84 | 1.12 | 0.87 | 1.16 |      |      |      |      |      | 1338 | 142.6 | 8.44 |
| Q86SQ4 | G-protein coupled receptor 126 OS=Homo sapiens GN=GPR126 PE=1 SV=3 - [GP126_HUMAN]                                      | 2.29  | 1 | 2  | 2  | 4   | 1.13 | 1.21 | 1.27 | 1.41 |      |      |      |      |      | 1221 | 136.6 | 7.87 |
| P46089 | G-protein coupled receptor 3 OS=Homo sapiens GN=GPR3 PE=1 SV=1 - [GPR3_HUMAN]                                           | 1.52  | 2 | 1  | 1  | 1   |      |      |      |      |      | 0.74 | 1.17 | 0.67 | 1.06 | 330  | 35.0  | 8.06 |
| P46095 | G-protein coupled receptor 6 OS=Homo sapiens GN=GPR6 PE=1 SV=1 - [GPR6_HUMAN]                                           | 1.38  | 1 | 1  | 1  | 1   |      |      |      |      |      | 1.30 | 0.18 | 1.29 | 0.18 | 362  | 37.9  | 7.68 |
| Q8IZP9 | G-protein coupled receptor 64 OS=Homo sapiens GN=GPR64 PE=1 SV=2 - [GPR64_HUMAN]                                        | 3.15  | 1 | 2  | 2  | 4   | 1.08 | 1.10 | 1.12 | 1.15 |      |      |      |      |      | 1017 | 111.5 | 7.55 |
| Q8WXG9 | G-protein coupled receptor 98 OS=Homo sapiens GN=GPR98 PE=1 SV=2 - [GPR98_HUMAN]                                        | 0.76  | 3 | 2  | 3  | 3   | 0.85 | 0.96 | 0.88 | 1.00 |      |      |      |      |      | 6306 | 692.6 | 4.64 |
| Q9NZD1 | G-protein coupled receptor family C group 5 member D OS=Homo sapiens GN=GPRC5D PE=2 SV=1 - [GPC5D_HUMAN]                | 2.90  | 1 | 1  | 1  | 2   |      |      |      |      |      | 0.75 | 0.90 | 0.79 | 0.95 | 345  | 38.8  | 5.00 |
| Q5T6X5 | G-protein coupled receptor family C group 6 member A OS=Homo sapiens GN=GPRC6A PE=1 SV=1 - [GPC6A_HUMAN]                | 1.94  | 1 | 1  | 1  | 2   | 1.11 | 1.21 | 1.15 | 1.26 |      |      |      |      |      | 926  | 104.7 | 7.96 |
| Q5JY77 | G-protein coupled receptor-associated sorting protein 1 OS=Homo sapiens GN=GPRASP1 PE=1 SV=3 - [GASP1_HUMAN]            | 1.86  | 1 | 1  | 1  | 3   | 0.60 | 0.38 | 0.51 | 0.33 |      |      |      |      |      | 1395 | 156.8 | 4.68 |
| P81274 | G-protein-signaling modulator 2 OS=Homo sapiens GN=GPSM2 PE=1 SV=3 - [GPSM2_HUMAN]                                      | 6.29  | 1 | 2  | 3  | 3   |      |      |      |      |      | 1.03 | 1.18 | 1.40 | 1.61 | 684  | 76.6  | 6.39 |
| Q9NYZ3 | G2 and S phase-expressed protein 1 OS=Homo sapiens GN=GTSE1 PE=1 SV=3 - [GTSE1_HUMAN]                                   | 3.47  | 1 | 1  | 1  | 1   | 1.15 | 1.69 | 1.42 | 2.12 |      |      |      |      |      | 720  | 76.6  | 9.39 |
| Q8WWL7 | G2/mitotic-specific cyclin-B3 OS=Homo sapiens GN=CCNB3 PE=1 SV=2 - [CCNB3_HUMAN]                                        | 0.79  | 1 | 1  | 1  | 3   |      |      |      |      |      | 1.05 |      |      |      | 1395 | 157.8 | 6.68 |
| Q06546 | GA-binding protein alpha chain OS=Homo sapiens GN=GABPA PE=1 SV=1 - [GABPA_HUMAN]                                       | 5.29  | 1 | 1  | 1  | 1   | 1.11 | 1.27 | 0.84 | 0.97 |      |      |      |      |      | 454  | 51.3  | 4.97 |
| P51570 | Galactokinase OS=Homo sapiens GN=GALK1 PE=1 SV=1 - [GALK1_HUMAN]                                                        | 2.81  | 1 | 1  | 1  | 3   | 0.87 | 0.79 | 1.24 | 1.12 | 2.48 | 2.23 | 2.36 | 2.12 | 392  | 42.2 | 6.46  |      |
| Q96RP7 | Galactose-3-O-sulfotransferase 4 OS=Homo sapiens GN=GAL3ST4 PE=1 SV=1 - [G3ST4_HUMAN]                                   | 6.58  | 1 | 2  | 2  | 2   | 0.59 | 0.17 | 0.64 | 0.18 | 0.56 | 0.84 | 0.41 | 0.62 | 486  | 54.1 | 10.18 |      |
| O94766 | Galactosylgalactosylxylosylprotein 3-beta-glucuronosyltransferase 3 OS=Homo sapiens GN=B3GAT3 PE=1 SV=2 - [B3GA3_HUMAN] | 4.78  | 1 | 1  | 2  | 3   |      |      |      |      |      | 0.50 | 0.29 | 1.01 | 0.59 | 335  | 37.1  | 8.27 |
| P47211 | Galanin receptor type 1 OS=Homo sapiens GN=GALR1 PE=2 SV=3 - [GALR1_HUMAN]                                              | 3.44  | 1 | 1  | 1  | 2   |      |      |      |      |      | 0.76 | 0.61 | 1.24 | 1.00 | 349  | 38.9  | 9.47 |
| P09382 | Galectin-1 OS=Homo sapiens GN=LGALS1 PE=1 SV=2 - [LEG1_HUMAN]                                                           | 46.67 | 1 | 4  | 4  | 13  |      |      |      |      |      | 0.87 | 0.97 | 0.88 | 0.94 | 135  | 14.7  | 5.50 |
| P05162 | Galectin-2 OS=Homo sapiens GN=LGALS2 PE=1 SV=3 - [LEG2_HUMAN]                                                           | 6.82  | 1 | 1  | 1  | 1   | 0.70 | 0.62 | 0.66 | 0.59 |      |      |      |      |      | 132  | 14.6  | 6.38 |
| P17931 | Galectin-3 OS=Homo sapiens GN=LGALS3 PE=1 SV=5 - [LEG3_HUMAN]                                                           | 19.60 | 1 | 5  | 5  | 9   |      |      |      |      |      | 1.10 | 1.07 | 1.01 | 0.98 | 250  | 26.1  | 8.56 |
| Q08380 | Galectin-3-binding protein OS=Homo sapiens GN=LGALS3BP PE=1 SV=1 - [LG3BP_HUMAN]                                        | 43.25 | 1 | 20 | 20 | 204 | 1.04 | 1.07 | 1.07 | 1.06 | 1.08 | 1.10 | 1.11 | 1.18 | 585  | 65.3 | 5.27  |      |
| O00182 | Galectin-9 OS=Homo sapiens GN=LGALS9 PE=1 SV=2 - [LEG9_HUMAN]                                                           | 6.48  | 3 | 3  | 3  | 7   | 0.94 | 0.93 | 1.13 | 1.12 | 0.52 | 0.64 | 0.60 | 0.69 | 355  | 39.5 | 9.17  |      |
| Q3ZCW2 | Galectin-related protein OS=Homo sapiens GN=LGALS L PE=1 SV=2 - [LEGL_HUMAN]                                            | 41.86 | 1 | 6  | 6  | 26  | 1.04 | 1.45 | 0.89 | 1.16 | 1.26 | 1.20 | 1.20 | 1.10 | 172  | 19.0 | 5.35  |      |
| Q86UU5 | Gametogenetin OS=Homo sapiens GN=GGN PE=2 SV=2 - [GGN_HUMAN]                                                            | 8.74  | 1 | 2  | 2  | 2   | 0.98 | 1.14 | 1.04 | 1.21 | 0.47 | 0.52 | 0.76 | 0.85 | 652  | 66.7 | 10.29 |      |
| Q9UEY8 | Gamma-adducin OS=Homo sapiens GN=ADD3 PE=1 SV=1 - [ADDG_HUMAN]                                                          | 2.97  | 1 | 1  | 1  | 1   |      |      |      |      |      | 0.31 | 0.27 | 0.85 | 0.75 | 706  | 79.1  | 6.32 |
| P14867 | Gamma-aminobutyric acid receptor subunit alpha-1 OS=Homo sapiens GN=GABRA1 PE=1 SV=3 - [GBRA1_HUMAN]                    | 4.39  | 1 | 1  | 1  | 1   | 0.89 | 0.76 | 0.47 | 0.41 |      |      |      |      |      | 456  | 51.8  | 9.22 |

|        |                                                                                                             |       |   |   |   |    |      |      |      |      |      |      |      |      |      |       |       |      |      |     |      |      |
|--------|-------------------------------------------------------------------------------------------------------------|-------|---|---|---|----|------|------|------|------|------|------|------|------|------|-------|-------|------|------|-----|------|------|
| P47869 | Gamma-aminobutyric acid receptor subunit alpha-2 OS=Homo sapiens GN=GABRA2 PE=2 SV=2 - [GBRA2_HUMAN]        | 1.77  | 1 | 1 | 1 | 1  |      |      |      |      |      |      |      |      |      | 0.69  | 0.73  | 0.77 | 0.81 | 451 | 51.3 | 9.11 |
| Q16445 | Gamma-aminobutyric acid receptor subunit alpha-6 OS=Homo sapiens GN=GABRA6 PE=2 SV=2 - [GBRA6_HUMAN]        | 9.05  | 1 | 3 | 3 | 4  | 0.70 | 0.68 | 0.93 | 0.91 | 0.75 | 0.94 | 0.88 | 1.19 | 453  | 51.0  | 8.22  |      |      |     |      |      |
| P28472 | Gamma-aminobutyric acid receptor subunit beta-3 OS=Homo sapiens GN=GABRB3 PE=1 SV=1 - [GBRB3_HUMAN]         | 8.88  | 1 | 2 | 2 | 2  | 0.71 | 0.58 | 0.98 | 0.80 | 1.17 | 1.27 | 1.02 | 1.11 | 473  | 54.1  | 9.11  |      |      |     |      |      |
| O00591 | Gamma-aminobutyric acid receptor subunit pi OS=Homo sapiens GN=GABRP PE=1 SV=1 - [GBRP_HUMAN]               | 4.32  | 1 | 1 | 1 | 5  |      |      |      |      | 1.90 | 1.33 | 1.91 | 1.34 | 440  | 50.6  | 6.99  |      |      |     |      |      |
| P24046 | Gamma-aminobutyric acid receptor subunit rho-1 OS=Homo sapiens GN=GABRR1 PE=2 SV=2 - [GBRR1_HUMAN]          | 3.34  | 1 | 1 | 1 | 1  |      |      |      |      | 1.10 | 1.24 | 1.14 | 1.29 | 479  | 55.8  | 8.60  |      |      |     |      |      |
| Q9UBS5 | Gamma-aminobutyric acid type B receptor subunit 1 OS=Homo sapiens GN=GABBR1 PE=1 SV=1 - [GABR1_HUMAN]       | 2.08  | 1 | 2 | 2 | 2  | 0.94 | 1.11 | 0.66 | 0.78 | 0.80 | 0.69 | 1.11 | 0.96 | 961  | 108.3 | 8.21  |      |      |     |      |      |
| O75899 | Gamma-aminobutyric acid type B receptor subunit 2 OS=Homo sapiens GN=GABBR2 PE=1 SV=1 - [GABR2_HUMAN]       | 1.38  | 1 | 1 | 1 | 1  | 1.06 | 1.03 | 1.13 | 1.10 |      |      |      |      | 941  | 105.8 | 8.66  |      |      |     |      |      |
| Q92820 | Gamma-glutamyl hydrolase OS=Homo sapiens GN=GGH PE=1 SV=2 - [GGH_HUMAN]                                     | 23.58 | 1 | 6 | 6 | 28 | 1.09 | 1.15 | 1.09 | 1.20 | 0.89 | 1.01 | 0.85 | 0.99 | 318  | 35.9  | 7.11  |      |      |     |      |      |
| O75223 | Gamma-glutamylcyclotransferase OS=Homo sapiens GN=GGCT PE=1 SV=1 - [GGCT_HUMAN]                             | 5.32  | 1 | 1 | 1 | 8  | 0.98 | 0.76 | 1.04 | 0.81 | 0.96 | 0.96 | 0.92 | 0.91 | 188  | 21.0  | 5.14  |      |      |     |      |      |
| P36269 | Gamma-glutamyltransferase 5 OS=Homo sapiens GN=GGT5 PE=1 SV=2 - [GGT5_HUMAN]                                | 7.68  | 1 | 3 | 3 | 5  | 1.10 | 1.05 | 1.03 | 0.98 | 1.03 | 0.88 | 1.26 | 1.08 | 586  | 62.2  | 7.55  |      |      |     |      |      |
| Q9UJ14 | Gamma-glutamyltransferase 7 OS=Homo sapiens GN=GGT7 PE=1 SV=2 - [GGT7_HUMAN]                                | 1.96  | 1 | 1 | 1 | 1  | 1.38 | 1.16 | 1.33 | 1.11 |      |      |      |      | 662  | 70.4  | 5.10  |      |      |     |      |      |
| P13284 | Gamma-interferon-inducible lysosomal thiol reductase OS=Homo sapiens GN=IFI30 PE=1 SV=3 - [GILT_HUMAN]      | 9.60  | 1 | 2 | 2 | 11 | 0.89 | 0.99 | 0.90 | 1.00 | 0.91 | 0.92 | 0.90 | 0.91 | 250  | 27.9  | 4.88  |      |      |     |      |      |
| Q9BSJ2 | Gamma-tubulin complex component 2 OS=Homo sapiens GN=TUBGCP2 PE=1 SV=2 - [GCP2_HUMAN]                       | 2.55  | 1 | 1 | 1 | 4  | 0.72 | 0.84 | 0.66 | 0.78 |      |      |      |      | 902  | 102.5 | 6.84  |      |      |     |      |      |
| Q96CW5 | Gamma-tubulin complex component 3 OS=Homo sapiens GN=TUBGCP3 PE=1 SV=2 - [GCP3_HUMAN]                       | 0.77  | 1 | 1 | 1 | 2  |      |      |      |      | 1.00 | 0.62 | 0.82 | 0.51 | 907  | 103.5 | 8.12  |      |      |     |      |      |
| Q96RT8 | Gamma-tubulin complex component 5 OS=Homo sapiens GN=TUBGCP5 PE=1 SV=1 - [GCP5_HUMAN]                       | 0.88  | 1 | 1 | 1 | 1  | 1.29 | 1.11 | 1.15 | 0.99 |      |      |      |      | 1024 | 118.2 | 5.90  |      |      |     |      |      |
| Q96RT7 | Gamma-tubulin complex component 6 OS=Homo sapiens GN=TUBGCP6 PE=1 SV=3 - [GCP6_HUMAN]                       | 1.10  | 1 | 1 | 1 | 1  |      |      |      |      | 1.46 | 1.29 | 1.08 | 0.95 | 1819 | 200.4 | 6.32  |      |      |     |      |      |
| P17900 | Ganglioside GM2 activator OS=Homo sapiens GN=GM2A PE=1 SV=4 - [SAP3_HUMAN]                                  | 14.51 | 1 | 2 | 2 | 4  |      |      |      |      | 0.95 | 0.93 | 0.87 | 0.85 | 193  | 20.8  | 5.31  |      |      |     |      |      |
| Q9NXN4 | Ganglioside-induced differentiation-associated protein 2 OS=Homo sapiens GN=GDAP2 PE=2 SV=1 - [GDAP2_HUMAN] | 3.62  | 1 | 1 | 1 | 4  | 1.19 | 2.06 | 0.73 | 1.27 |      |      |      |      | 497  | 56.2  | 5.74  |      |      |     |      |      |
| P36382 | Gap junction alpha-5 protein OS=Homo sapiens GN=GJA5 PE=1 SV=3 - [CXA5_HUMAN]                               | 1.68  | 1 | 1 | 1 | 1  |      |      |      |      | 1.00 | 0.20 | 1.00 | 0.20 | 358  | 40.4  | 8.50  |      |      |     |      |      |
| P48165 | Gap junction alpha-8 protein OS=Homo sapiens GN=GJA8 PE=1 SV=3 - [CXA8_HUMAN]                               | 4.85  | 1 | 1 | 1 | 1  | 1.13 | 1.34 | 1.14 | 1.36 |      |      |      |      | 433  | 48.2  | 5.27  |      |      |     |      |      |
| P57773 | Gap junction alpha-9 protein OS=Homo sapiens GN=GJA9 PE=2 SV=2 - [CXA9_HUMAN]                               | 10.49 | 1 | 3 | 3 | 4  | 1.44 | 0.88 | 1.76 | 1.08 |      |      |      |      | 515  | 58.8  | 8.37  |      |      |     |      |      |
| Q99501 | GAS2-like protein 1 OS=Homo sapiens GN=GAS2L1 PE=1 SV=2 - [GA2L1_HUMAN]                                     | 2.79  | 1 | 1 | 1 | 1  |      |      |      |      | 0.75 | 0.88 | 0.71 | 0.84 | 681  | 72.7  | 10.05 |      |      |     |      |      |
| Q96QA5 | Gasdermin-A OS=Homo sapiens GN=GSDMA PE=2 SV=4 - [GSDMA_HUMAN]                                              | 4.27  | 1 | 1 | 1 | 3  | 1.30 | 1.53 | 1.28 | 1.51 |      |      |      |      | 445  | 49.3  | 5.29  |      |      |     |      |      |
| Q9BYG8 | Gasdermin-C OS=Homo sapiens GN=GSDMC PE=2 SV=3 - [GSDMC_HUMAN]                                              | 2.95  | 1 | 1 | 1 | 1  | 0.44 | 0.66 | 0.38 | 0.57 |      |      |      |      | 508  | 57.7  | 5.78  |      |      |     |      |      |
| P09681 | Gastric inhibitory polypeptide OS=Homo sapiens GN=GIP PE=1 SV=1 - [GIP_HUMAN]                               | 9.15  | 1 | 1 | 1 | 4  |      |      |      |      | 1.49 | 1.73 | 1.41 | 1.63 | 153  | 17.1  | 8.00  |      |      |     |      |      |
| P27352 | Gastric intrinsic factor OS=Homo sapiens GN=GIF PE=1 SV=2 - [IF_HUMAN]                                      | 7.19  | 1 | 1 | 1 | 1  |      |      |      |      | 0.95 | 2.01 |      |      | 417  | 45.4  | 6.14  |      |      |     |      |      |
| P20142 | Gastricsin OS=Homo sapiens GN=PGC PE=1 SV=1 - [PEPC_HUMAN]                                                  | 1.80  | 1 | 1 | 1 | 8  | 0.86 | 0.86 | 0.69 | 0.69 | 0.62 | 0.56 | 0.92 | 0.83 | 388  | 42.4  | 4.46  |      |      |     |      |      |

|        |                                                                                                                              |       |   |    |    |     |      |      |      |      |      |      |      |      |      |       |      |     |      |      |
|--------|------------------------------------------------------------------------------------------------------------------------------|-------|---|----|----|-----|------|------|------|------|------|------|------|------|------|-------|------|-----|------|------|
| Q9NS71 | Gastrokine-1 OS=Homo sapiens GN=GKN1 PE=2 SV=3 - [GKN1_HUMAN]                                                                | 10.55 | 1 | 2  | 2  | 2   |      |      |      |      |      |      |      | 1.03 | 0.89 | 1.06  | 0.92 | 199 | 22.0 | 6.32 |
| Q9Y5B6 | GC-rich sequence DNA-binding factor 1 OS=Homo sapiens GN=GCFC1 PE=1 SV=2 - [GCFC1_HUMAN]                                     | 4.58  | 1 | 4  | 4  | 7   | 1.13 | 1.36 | 0.80 | 1.00 | 0.76 | 0.83 | 0.81 | 0.89 | 917  | 104.7 | 5.68 |     |      |      |
| O95479 | GDH6PGL endoplasmic bifunctional protein OS=Homo sapiens GN=H6PD PE=1 SV=2 - [G6PE_HUMAN]                                    | 7.84  | 1 | 5  | 5  | 14  | 0.77 | 0.81 | 0.68 | 0.67 | 1.01 | 1.02 | 1.11 | 1.02 | 791  | 88.8  | 7.30 |     |      |      |
| P56159 | GDNF family receptor alpha-1 OS=Homo sapiens GN=GFRA1 PE=2 SV=2 - [GFRA1_HUMAN]                                              | 2.80  | 1 | 1  | 1  | 1   |      |      |      |      | 2.06 | 2.30 | 1.53 | 1.71 | 465  | 51.4  | 7.91 |     |      |      |
| P06396 | Gelsolin OS=Homo sapiens GN=GSN PE=1 SV=1 - [GELS_HUMAN]                                                                     | 60.49 | 1 | 42 | 42 | 819 | 0.93 | 0.87 | 0.94 | 0.88 | 0.92 | 0.98 | 0.88 | 0.96 | 782  | 85.6  | 6.28 |     |      |      |
| Q12789 | General transcription factor 3C polypeptide 1 OS=Homo sapiens GN=GTF3C1 PE=1 SV=4 - [TF3C1_HUMAN]                            | 0.57  | 1 | 1  | 1  | 1   | 0.84 | 0.91 | 0.82 | 0.90 |      |      |      |      | 2109 | 238.7 | 7.30 |     |      |      |
| Q8WUA4 | General transcription factor 3C polypeptide 2 OS=Homo sapiens GN=GTF3C2 PE=1 SV=2 - [TF3C2_HUMAN]                            | 2.63  | 1 | 2  | 2  | 4   | 0.70 | 0.73 | 0.84 | 0.88 | 0.73 | 0.78 | 0.68 | 0.73 | 911  | 100.6 | 7.31 |     |      |      |
| Q9Y5Q9 | General transcription factor 3C polypeptide 3 OS=Homo sapiens GN=GTF3C3 PE=1 SV=1 - [TF3C3_HUMAN]                            | 2.37  | 1 | 2  | 2  | 2   | 0.77 | 0.81 | 0.76 | 0.80 | 1.65 | 1.46 | 1.38 | 1.22 | 886  | 101.2 | 5.07 |     |      |      |
| P78347 | General transcription factor II-I OS=Homo sapiens GN=GTF2I PE=1 SV=2 - [GTF2I_HUMAN]                                         | 0.60  | 1 | 1  | 1  | 1   |      |      |      |      | 1.01 | 1.33 | 1.06 | 1.38 | 998  | 112.3 | 6.39 |     |      |      |
| Q9UHL9 | General transcription factor II-I repeat domain-containing protein 1 OS=Homo sapiens GN=GTF2IRD1 PE=1 SV=1 - [GT2D1_HUMAN]   | 5.11  | 1 | 3  | 3  | 3   | 1.22 | 1.06 | 1.22 | 0.69 | 1.03 | 0.91 | 1.08 | 0.95 | 959  | 106.0 | 6.87 |     |      |      |
| Q6EKJ0 | General transcription factor II-I repeat domain-containing protein 2B OS=Homo sapiens GN=GTF2IRD2B PE=1 SV=1 - [GTD2B_HUMAN] | 1.26  | 2 | 1  | 1  | 1   |      |      |      |      | 0.79 | 1.00 | 0.54 | 0.68 | 949  | 107.2 | 5.85 |     |      |      |
| P32780 | General transcription factor IIH subunit 1 OS=Homo sapiens GN=GTF2H1 PE=1 SV=1 - [TF2H1_HUMAN]                               | 3.10  | 1 | 1  | 1  | 1   |      |      |      |      | 3.06 | 2.91 | 3.07 | 2.93 | 548  | 62.0  | 8.66 |     |      |      |
| Q13888 | General transcription factor IIH subunit 2 OS=Homo sapiens GN=GTF2H2 PE=1 SV=1 - [TF2H2_HUMAN]                               | 1.77  | 2 | 1  | 1  | 1   |      |      |      |      | 0.58 | 0.90 | 0.58 | 0.89 | 395  | 44.4  | 6.76 |     |      |      |
| O60763 | General vesicular transport factor p115 OS=Homo sapiens GN=USO1 PE=1 SV=2 - [USO1_HUMAN]                                     | 1.77  | 1 | 1  | 1  | 5   | 1.33 | 1.41 | 1.53 | 1.63 |      |      |      |      | 962  | 107.8 | 4.91 |     |      |      |
| Q14687 | Genetic suppressor element 1 OS=Homo sapiens GN=GSE1 PE=1 SV=3 - [GSE1_HUMAN]                                                | 0.74  | 1 | 1  | 1  | 1   | 0.94 | 1.52 | 0.79 | 1.28 |      |      |      |      | 1217 | 136.1 | 7.74 |     |      |      |
| Q92696 | Geranylgeranyl transferase type-2 subunit alpha OS=Homo sapiens GN=RABGGTA PE=1 SV=2 - [PGTA_HUMAN]                          | 5.29  | 1 | 1  | 1  | 2   |      |      |      |      | 1.17 | 1.07 | 1.16 | 1.06 | 567  | 65.0  | 5.67 |     |      |      |
| Q96IK5 | Germ cell-less protein-like 1 OS=Homo sapiens GN=GMCL1 PE=1 SV=1 - [GMCL1_HUMAN]                                             | 2.72  | 1 | 1  | 1  | 2   |      |      |      |      | 0.98 | 0.99 | 0.91 | 0.93 | 515  | 58.6  | 7.44 |     |      |      |
| Q8N6F7 | Germinal center B-cell-expressed transcript 2 protein OS=Homo sapiens GN=GCET2 PE=1 SV=1 - [GCET2_HUMAN]                     | 11.80 | 1 | 1  | 1  | 6   | 1.09 | 0.99 | 1.15 | 1.05 | 1.54 | 1.50 | 1.93 | 1.88 | 178  | 21.0  | 6.52 |     |      |      |
| Q8N2G8 | GH3 domain-containing protein OS=Homo sapiens GN=GHDC PE=1 SV=2 - [GHDC_HUMAN]                                               | 3.77  | 1 | 1  | 1  | 1   |      |      |      |      | 1.10 | 1.07 | 0.81 | 0.79 | 530  | 57.5  | 7.88 |     |      |      |
| Q3V6T2 | Girdin OS=Homo sapiens GN=CCDC88A PE=1 SV=2 - [GRDN_HUMAN]                                                                   | 1.87  | 4 | 2  | 4  | 99  | 0.59 | 0.73 | 0.79 | 0.90 |      |      |      |      | 1871 | 215.9 | 6.21 |     |      |      |
| P60983 | Glia maturation factor beta OS=Homo sapiens GN=GMFB PE=1 SV=2 - [GMFB_HUMAN]                                                 | 38.03 | 1 | 3  | 4  | 14  |      |      |      |      | 1.18 | 1.14 | 1.08 | 1.13 | 142  | 16.7  | 5.29 |     |      |      |
| O60234 | Glia maturation factor gamma OS=Homo sapiens GN=GMFG PE=1 SV=1 - [GMFG_HUMAN]                                                | 15.49 | 1 | 1  | 2  | 9   |      |      |      |      | 1.33 | 1.42 | 1.24 | 1.32 | 142  | 16.8  | 5.26 |     |      |      |
| P07093 | Glia-derived nexin OS=Homo sapiens GN=SERPINE2 PE=1 SV=1 - [GDN_HUMAN]                                                       | 14.32 | 1 | 5  | 5  | 13  | 1.35 | 1.38 | 1.35 | 1.43 | 1.10 | 1.14 | 1.19 | 1.24 | 398  | 44.0  | 9.29 |     |      |      |
| Q6ZM13 | Gliomedin OS=Homo sapiens GN=GLDN PE=2 SV=1 - [GLDN_HUMAN]                                                                   | 4.36  | 1 | 1  | 1  | 4   | 1.08 | 1.33 | 0.89 | 0.84 |      |      |      |      | 551  | 58.9  | 8.02 |     |      |      |
| Q92990 | Glomulin OS=Homo sapiens GN=GLMN PE=1 SV=2 - [GLMN_HUMAN]                                                                    | 1.68  | 1 | 1  | 1  | 2   |      |      |      |      | 1.10 | 1.11 | 1.12 | 1.13 | 594  | 68.2  | 5.33 |     |      |      |
| Q06210 | Glucosamine-fructose-6-phosphate aminotransferase [isomerizing] 1 OS=Homo sapiens GN=GFPT1 PE=1 SV=3 - [GFPT1_HUMAN]         | 2.43  | 1 | 1  | 2  | 2   |      |      |      |      | #### | ###  | ###  | #### | 699  | 78.8  | 7.11 |     |      |      |
| Q8TDQ7 | Glucosamine-6-phosphate isomerase 2 OS=Homo sapiens GN=GNPDA2 PE=1 SV=1 - [GNPI2_HUMAN]                                      | 10.87 | 1 | 1  | 1  | 1   | 0.78 | 1.01 | 0.64 | 0.84 |      |      |      |      | 276  | 31.1  | 6.95 |     |      |      |

|        |                                                                                                    |       |   |   |   |    |      |      |      |      |      |      |      |      |  |      |       |      |
|--------|----------------------------------------------------------------------------------------------------|-------|---|---|---|----|------|------|------|------|------|------|------|------|--|------|-------|------|
| Q6PCE3 | Glucose 1,6-bisphosphate synthase OS=Homo sapiens<br>GN=PGM2L1 PE=1 SV=3 - [PGM2L_HUMAN]           | 3.22  | 1 | 1 | 1 | 1  | 0.68 | 0.43 | 0.77 | 0.50 |      |      |      |      |  | 622  | 70.4  | 7.15 |
| Q9NQR9 | Glucose-6-phosphatase 2 OS=Homo sapiens GN=G6PC2<br>PE=1 SV=1 - [G6PC2_HUMAN]                      | 6.20  | 1 | 1 | 1 | 1  |      |      |      |      | 0.82 | 0.96 | 0.80 | 0.94 |  | 355  | 40.6  | 8.32 |
| P11413 | Glucose-6-phosphate 1-dehydrogenase OS=Homo sapiens<br>GN=G6PD PE=1 SV=4 - [G6PD_HUMAN]            | 7.57  | 1 | 2 | 2 | 2  | 0.72 | 0.82 | 0.62 | 0.71 | 0.66 | 0.68 | 0.83 | 0.86 |  | 515  | 59.2  | 6.84 |
| P06744 | Glucose-6-phosphate isomerase OS=Homo sapiens GN=GPI<br>PE=1 SV=4 - [G6PI_HUMAN]                   | 9.86  | 1 | 4 | 4 | 11 | 0.93 | 0.86 | 0.87 | 0.82 |      |      |      |      |  | 558  | 63.1  | 8.32 |
| P14314 | Glucosidase 2 subunit beta OS=Homo sapiens GN=PRKCSH<br>PE=1 SV=2 - [GLU2B_HUMAN]                  | 12.31 | 1 | 4 | 5 | 10 | 0.78 | 0.70 | 0.71 | 0.64 | 1.32 | 1.21 | 1.29 | 1.18 |  | 528  | 59.4  | 4.41 |
| Q4G148 | Glucoside xylosyltransferase 1 OS=Homo sapiens<br>GN=GXYLT1 PE=1 SV=2 - [GXYLT1_HUMAN]             | 3.64  | 1 | 1 | 1 | 2  | 0.99 | 1.04 | 1.02 | 1.08 |      |      |      |      |  | 440  | 50.5  | 8.65 |
| P04062 | Glucosylceramidase OS=Homo sapiens GN=GBA PE=1 SV=3<br>- [GLCM_HUMAN]                              | 1.12  | 1 | 1 | 1 | 1  | 1.20 | 1.21 | 1.27 | 1.28 |      |      |      |      |  | 536  | 59.7  | 7.61 |
| Q8TCU5 | Glutamate [NMDA] receptor subunit 3A OS=Homo sapiens<br>GN=GRIN3A PE=1 SV=2 - [NMD3A_HUMAN]        | 2.60  | 1 | 1 | 1 | 1  |      |      |      |      | 1.16 | 0.87 | 1.13 | 0.85 |  | 1115 | 125.4 | 7.59 |
| Q12879 | Glutamate [NMDA] receptor subunit epsilon-1 OS=Homo sapiens<br>GN=GRIN2A PE=1 SV=1 - [NMDE1_HUMAN] | 1.84  | 1 | 3 | 3 | 3  |      |      |      |      | 0.50 | 0.48 | 0.94 | 0.91 |  | 1464 | 165.2 | 7.11 |
| Q13224 | Glutamate [NMDA] receptor subunit epsilon-2 OS=Homo sapiens<br>GN=GRIN2B PE=1 SV=3 - [NMDE2_HUMAN] | 1.21  | 1 | 1 | 1 | 6  | 0.78 | 0.77 | 0.99 | 0.96 | 1.12 | 1.16 | 1.18 | 1.22 |  | 1484 | 166.3 | 6.93 |
| O15399 | Glutamate [NMDA] receptor subunit epsilon-4 OS=Homo sapiens<br>GN=GRIN2D PE=2 SV=2 - [NMDE4_HUMAN] | 0.90  | 1 | 1 | 1 | 2  |      |      |      |      | 1.21 | 1.10 | 1.07 | 0.97 |  | 1336 | 143.7 | 8.35 |
| Q05586 | Glutamate [NMDA] receptor subunit zeta-1 OS=Homo sapiens<br>GN=GRIN1 PE=1 SV=1 - [NMDZ1_HUMAN]     | 1.39  | 1 | 1 | 1 | 1  |      |      |      |      | 2.12 | 1.59 | 0.93 | 0.69 |  | 938  | 105.3 | 8.88 |
| Q04609 | Glutamate carboxypeptidase 2 OS=Homo sapiens GN=FOLH1<br>PE=1 SV=1 - [FOLH1_HUMAN]                 | 6.40  | 2 | 2 | 2 | 2  | 0.43 | 0.22 | 0.89 | 0.46 | 1.28 | 1.72 | 1.25 | 1.67 |  | 750  | 84.3  | 6.98 |
| Q05329 | Glutamate decarboxylase 2 OS=Homo sapiens GN=GAD2<br>PE=1 SV=1 - [DCE2_HUMAN]                      | 2.39  | 1 | 1 | 1 | 2  | 0.81 | 0.86 | 0.84 | 0.90 |      |      |      |      |  | 585  | 65.4  | 6.90 |
| P00367 | Glutamate dehydrogenase 1, mitochondrial OS=Homo sapiens<br>GN=GLUD1 PE=1 SV=2 - [DHE3_HUMAN]      | 2.87  | 1 | 1 | 1 | 1  | 0.95 | 0.98 | 0.99 | 1.03 |      |      |      |      |  | 558  | 61.4  | 7.80 |
| P49448 | Glutamate dehydrogenase 2, mitochondrial OS=Homo sapiens<br>GN=GLUD2 PE=1 SV=2 - [DHE4_HUMAN]      | 5.56  | 1 | 2 | 2 | 2  |      |      |      |      | 0.89 | 1.10 | 0.57 | 0.77 |  | 558  | 61.4  | 8.46 |
| P42262 | Glutamate receptor 2 OS=Homo sapiens GN=GRIA2 PE=1<br>SV=3 - [GRIA2_HUMAN]                         | 3.96  | 1 | 2 | 2 | 4  |      |      |      |      | 1.14 | 1.35 | 0.91 | 1.07 |  | 883  | 98.8  | 7.58 |
| P48058 | Glutamate receptor 4 OS=Homo sapiens GN=GRIA4 PE=2<br>SV=2 - [GRIA4_HUMAN]                         | 2.88  | 1 | 2 | 2 | 3  | 1.70 | 0.82 |      |      | 1.79 | 1.18 | 1.06 | 0.70 |  | 902  | 100.8 | 8.10 |
| O43424 | Glutamate receptor delta-2 subunit OS=Homo sapiens<br>GN=GRID2 PE=2 SV=2 - [GRID2_HUMAN]           | 1.69  | 1 | 1 | 1 | 1  | 0.55 | 0.64 | 0.64 | 0.75 |      |      |      |      |  | 1007 | 113.3 | 6.07 |
| Q9Y3R0 | Glutamate receptor-interacting protein 1 OS=Homo sapiens<br>GN=GRIP1 PE=1 SV=3 - [GRIP1_HUMAN]     | 1.86  | 1 | 1 | 1 | 1  | 0.31 | 0.32 | 0.27 | 0.28 |      |      |      |      |  | 1128 | 122.3 | 6.47 |
| Q9C0E4 | Glutamate receptor-interacting protein 2 OS=Homo sapiens<br>GN=GRIP2 PE=1 SV=3 - [GRIP2_HUMAN]     | 1.82  | 1 | 1 | 1 | 3  | 0.93 | 0.83 | 0.78 | 0.76 |      |      |      |      |  | 1043 | 112.4 | 6.49 |
| P39086 | Glutamate receptor, ionotropic kainate 1 OS=Homo sapiens<br>GN=GRIK1 PE=1 SV=1 - [GRIK1_HUMAN]     | 0.87  | 1 | 2 | 2 | 2  |      |      |      |      | 1.44 | 1.25 | 1.30 | 0.94 |  | 918  | 103.9 | 7.08 |
| Q16099 | Glutamate receptor, ionotropic kainate 4 OS=Homo sapiens<br>GN=GRIK4 PE=2 SV=2 - [GRIK4_HUMAN]     | 1.67  | 1 | 1 | 1 | 1  |      |      |      |      | 0.37 | 0.58 | 0.64 | 1.00 |  | 956  | 107.2 | 6.73 |
| Q9UI32 | Glutaminase liver isoform, mitochondrial OS=Homo sapiens<br>GN=GLS2 PE=1 SV=2 - [GLSL_HUMAN]       | 2.16  | 1 | 2 | 2 | 27 |      |      |      |      | 1.47 | 1.15 | 0.57 | 0.45 |  | 602  | 66.3  | 7.30 |
| Q2TAL8 | Glutamine-rich protein 1 OS=Homo sapiens GN=QRICH1<br>PE=1 SV=1 - [QRIC1_HUMAN]                    | 1.42  | 1 | 1 | 1 | 1  |      |      |      |      | 1.16 | 1.17 | 1.18 | 1.20 |  | 776  | 86.4  | 5.87 |
| Q9H0J4 | Glutamine-rich protein 2 OS=Homo sapiens GN=QRICH2<br>PE=2 SV=1 - [QRIC2_HUMAN]                    | 1.62  | 1 | 1 | 1 | 1  |      |      |      |      | 0.93 | 0.52 |      |      |  | 1663 | 180.7 | 6.73 |
| Q16769 | Glutaminyl-peptide cyclotransferase OS=Homo sapiens<br>GN=QPCT PE=1 SV=1 - [QPCT_HUMAN]            | 3.88  | 1 | 1 | 1 | 2  | 0.86 | 0.94 | 0.80 | 0.89 |      |      |      |      |  | 361  | 40.9  | 6.61 |



|        |                                                                                                             |       |   |    |    |     |      |      |      |      |      |      |       |      |      |       |      |
|--------|-------------------------------------------------------------------------------------------------------------|-------|---|----|----|-----|------|------|------|------|------|------|-------|------|------|-------|------|
| Q07075 | Glutamyl aminopeptidase OS=Homo sapiens GN=ENPEP PE=1 SV=3 - [AMPE_HUMAN]                                   | 2.61  | 1 | 2  | 2  | 3   | 1.13 | 1.39 | 0.96 | 1.17 |      | 957  | 109.2 | 5.47 |      |       |      |
| A8MXD5 | Glutaredoxin domain-containing cysteine-rich protein 1 OS=Homo sapiens GN=GRXCR1 PE=1 SV=1 - [GRCR1_HUMAN]  | 4.48  | 1 | 1  | 1  | 1   | 1.09 | 1.23 | 1.19 | 1.34 |      | 290  | 32.3  | 7.52 |      |       |      |
| P35754 | Glutaredoxin-1 OS=Homo sapiens GN=GLRX PE=1 SV=2 - [GLRX1_HUMAN]                                            | 30.19 | 1 | 2  | 2  | 6   |      |      |      |      | 1.00 | 0.95 | 0.93  | 0.89 | 106  | 11.8  | 8.09 |
| P22352 | Glutathione peroxidase 3 OS=Homo sapiens GN=GPX3 PE=1 SV=2 - [GPX3_HUMAN]                                   | 37.61 | 1 | 8  | 8  | 160 | 1.05 | 1.04 | 1.03 | 1.01 | 1.14 | 1.20 | 1.09  | 1.16 | 226  | 25.5  | 8.13 |
| Q96SL4 | Glutathione peroxidase 7 OS=Homo sapiens GN=GPX7 PE=1 SV=1 - [GPX7_HUMAN]                                   | 6.42  | 9 | 1  | 2  | 3   |      |      |      |      | 0.89 | 1.04 | 0.87  | 1.02 | 187  | 21.0  | 8.27 |
| P00390 | Glutathione reductase, mitochondrial OS=Homo sapiens GN=GSR PE=1 SV=2 - [GSHR_HUMAN]                        | 2.49  | 1 | 1  | 1  | 2   | 0.88 | 0.87 | 0.87 | 0.85 |      |      |       |      | 522  | 56.2  | 8.50 |
| P28161 | Glutathione S-transferase Mu 2 OS=Homo sapiens GN=GSTM2 PE=1 SV=2 - [GSTM2_HUMAN]                           | 7.80  | 1 | 1  | 1  | 3   |      |      |      |      | 1.18 | 1.16 | 1.01  | 1.00 | 218  | 25.7  | 6.37 |
| P78417 | Glutathione S-transferase omega-1 OS=Homo sapiens GN=GSTO1 PE=1 SV=2 - [GSTO1_HUMAN]                        | 15.77 | 1 | 4  | 4  | 15  | 0.63 | 0.66 | 0.64 | 0.68 | 0.79 | 0.92 | 0.88  | 1.01 | 241  | 27.5  | 6.60 |
| P09211 | Glutathione S-transferase P OS=Homo sapiens GN=GSTP1 PE=1 SV=2 - [GSTP1_HUMAN]                              | 38.57 | 1 | 5  | 5  | 19  | 0.56 | 0.68 | 0.47 | 0.57 | 1.02 | 1.08 | 0.92  | 0.93 | 210  | 23.3  | 5.64 |
| P48637 | Glutathione synthetase OS=Homo sapiens GN=GSS PE=1 SV=1 - [GSHB_HUMAN]                                      | 3.16  | 1 | 2  | 2  | 5   | 0.90 | 0.89 | 0.90 | 0.89 |      |      |       |      | 474  | 52.4  | 5.92 |
| P04406 | Glyceraldehyde-3-phosphate dehydrogenase OS=Homo sapiens GN=GAPDH PE=1 SV=3 - [G3P_HUMAN]                   | 37.61 | 2 | 11 | 11 | 50  | 0.43 | 0.43 | 0.45 | 0.44 | 0.69 | 0.77 | 0.72  | 0.78 | 335  | 36.0  | 8.46 |
| Q6NUI2 | Glycerol-3-phosphate acyltransferase 2, mitochondrial OS=Homo sapiens GN=GPAT2 PE=2 SV=2 - [GPAT2_HUMAN]    | 0.88  | 1 | 1  | 1  | 1   | 1.89 | 1.60 | 1.90 | 1.61 |      |      |       |      | 795  | 87.8  | 7.61 |
| P23378 | Glycine dehydrogenase [decarboxylating], mitochondrial OS=Homo sapiens GN=GLDC PE=1 SV=2 - [GCSP_HUMAN]     | 0.69  | 1 | 1  | 1  | 1   | 1.03 | 0.97 | 1.08 | 1.01 |      |      |       |      | 1020 | 112.7 | 7.11 |
| Q14749 | Glycine N-methyltransferase OS=Homo sapiens GN=GNMT PE=1 SV=3 - [GNMT_HUMAN]                                | 9.15  | 1 | 1  | 1  | 1   | 0.82 | 0.94 | 0.84 | 0.97 |      |      |       |      | 295  | 32.7  | 7.02 |
| P23415 | Glycine receptor subunit alpha-1 OS=Homo sapiens GN=GLRA1 PE=1 SV=2 - [GLRA1_HUMAN]                         | 7.00  | 1 | 2  | 2  | 5   | 1.33 | 1.11 | 1.19 | 1.00 | 0.75 | 0.93 | 0.92  | 1.12 | 457  | 52.6  | 8.79 |
| Q5JXX5 | Glycine receptor subunit alpha-4 OS=Homo sapiens GN=GLRA4 PE=2 SV=3 - [GLRA4_HUMAN]                         | 4.08  | 1 | 1  | 1  | 2   | 1.10 | 1.04 | 1.24 | 1.17 |      |      |       |      | 417  | 47.7  | 8.24 |
| P54840 | Glycogen [starch] synthase, liver OS=Homo sapiens GN=GYS2 PE=1 SV=2 - [GYS2_HUMAN]                          | 5.55  | 1 | 2  | 2  | 4   | 1.37 | 1.39 | 1.11 | 1.12 | 1.22 | 1.83 | 1.55  | 2.33 | 703  | 80.9  | 6.83 |
| P06737 | Glycogen phosphorylase, liver form OS=Homo sapiens GN=PYGL PE=1 SV=4 - [PYGL_HUMAN]                         | 8.26  | 1 | 5  | 5  | 8   | 0.88 | 0.87 | 0.92 | 0.89 | 0.98 | 1.00 | 1.05  | 1.08 | 847  | 97.1  | 7.17 |
| P46976 | Glycogenin-1 OS=Homo sapiens GN=GYG1 PE=1 SV=4 - [GLY_HUMAN]                                                | 10.00 | 1 | 2  | 2  | 2   | 1.73 | 1.33 | 2.82 | 2.18 | 0.77 | 0.75 | 0.77  | 0.75 | 350  | 39.4  | 5.53 |
| O15488 | Glycogenin-2 OS=Homo sapiens GN=GYG2 PE=1 SV=2 - [GLYG2_HUMAN]                                              | 4.59  | 1 | 1  | 1  | 2   | 0.68 | 0.70 | 0.47 | 0.48 | 1.07 | 0.98 | 1.14  | 1.05 | 501  | 55.1  | 5.10 |
| Q9NZD2 | Glycolipid transfer protein OS=Homo sapiens GN=GLTP PE=1 SV=3 - [GLTP_HUMAN]                                | 5.74  | 1 | 1  | 1  | 2   | 0.80 | 0.63 | 0.86 | 0.67 |      |      |       |      | 209  | 23.8  | 7.39 |
| P01215 | Glycoprotein hormones alpha chain OS=Homo sapiens GN=CGA PE=1 SV=1 - [GLHA_HUMAN]                           | 12.07 | 1 | 2  | 2  | 2   |      |      |      |      | 2.92 | 2.98 | 2.77  | 2.82 | 116  | 13.1  | 8.19 |
| Q99445 | Glycosyl-phosphatidylinositol-anchored molecule-like protein OS=Homo sapiens GN=GML PE=2 SV=1 - [GML_HUMAN] | 9.49  | 1 | 1  | 1  | 1   | 0.35 | 0.28 | 0.41 | 0.32 |      |      |       |      | 158  | 17.7  | 6.48 |
| Q96MS3 | Glycosyltransferase 1 domain-containing protein 1 OS=Homo sapiens GN=GLT1D1 PE=2 SV=2 - [GL1D1_HUMAN]       | 2.89  | 1 | 1  | 1  | 1   | 0.99 | 1.17 | 1.00 | 1.19 |      |      |       |      | 346  | 38.5  | 6.47 |
| Q9HC38 | Glyoxalase domain-containing protein 4 OS=Homo sapiens GN=GLOD4 PE=1 SV=1 - [GLOD4_HUMAN]                   | 3.19  | 1 | 1  | 1  | 1   |      |      |      |      | 1.09 | 1.40 | 0.90  | 1.16 | 313  | 34.8  | 5.60 |
| Q8N158 | Glypican-2 OS=Homo sapiens GN=GPC2 PE=1 SV=1 - [GPC2_HUMAN]                                                 | 2.42  | 1 | 1  | 1  | 1   |      |      |      |      | 0.88 | 0.93 | 0.84  | 0.89 | 579  | 62.8  | 8.00 |
| O75487 | Glypican-4 OS=Homo sapiens GN=GPC4 PE=1 SV=4 - [GPC4_HUMAN]                                                 | 4.32  | 1 | 2  | 2  | 4   | 1.26 |      | 0.73 | 1.18 | 1.49 | 1.22 | 1.55  | 556  | 62.4 | 6.68  |      |

|        |                                                                                                                             |       |   |   |   |    |      |      |      |      |      |      |      |      |      |       |       |
|--------|-----------------------------------------------------------------------------------------------------------------------------|-------|---|---|---|----|------|------|------|------|------|------|------|------|------|-------|-------|
| Q92896 | Golgi apparatus protein 1 OS=Homo sapiens GN=GLG1 PE=1 SV=2 - [GSLG1_HUMAN]                                                 | 6.36  | 1 | 2 | 3 | 17 | 1.04 | 0.83 | 1.14 | 0.92 | 0.95 | 1.31 | 1.04 | 1.19 | 1179 | 134.5 | 6.90  |
| Q8NBJ4 | Golgi membrane protein 1 OS=Homo sapiens GN=GOLM1 PE=1 SV=1 - [GOLM1_HUMAN]                                                 | 4.74  | 1 | 2 | 2 | 3  | 0.75 | 0.78 | 0.84 | 0.87 | 1.00 | 0.76 | 0.95 | 0.73 | 401  | 45.3  | 4.97  |
| Q9H4A6 | Golgi phosphoprotein 3 OS=Homo sapiens GN=GOLPH3 PE=1 SV=1 - [GOLP3_HUMAN]                                                  | 2.01  | 1 | 1 | 1 | 1  |      |      |      |      | 0.79 | 0.75 | 0.86 | 0.83 | 298  | 33.8  | 6.44  |
| Q9BQQ3 | Golgi reassembly-stacking protein 1 OS=Homo sapiens GN=GORASP1 PE=1 SV=3 - [GORS1_HUMAN]                                    | 6.14  | 1 | 1 | 1 | 1  |      |      |      |      | 0.82 | 0.92 | 0.92 | 1.02 | 440  | 46.5  | 4.50  |
| Q9H4G4 | Golgi-associated plant pathogenesis-related protein 1 OS=Homo sapiens GN=GLIPR2 PE=1 SV=3 - [GAPR1_HUMAN]                   | 16.88 | 1 | 2 | 2 | 8  | 0.89 | 0.73 | 0.75 | 0.61 | 1.29 | 1.35 | 1.23 | 1.29 | 154  | 17.2  | 9.41  |
| Q92805 | Golgin subfamily A member 1 OS=Homo sapiens GN=GOLGA1 PE=1 SV=3 - [GOGA1_HUMAN]                                             | 4.95  | 1 | 2 | 2 | 2  | 0.80 | 0.85 | 0.91 | 0.98 | 1.07 | 0.86 | 1.18 | 0.94 | 767  | 88.1  | 5.27  |
| Q08379 | Golgin subfamily A member 2 OS=Homo sapiens GN=GOLGA2 PE=1 SV=3 - [GOGA2_HUMAN]                                             | 1.70  | 1 | 1 | 1 | 1  | 0.76 | 0.82 | 1.00 | 1.08 |      |      |      |      | 1002 | 113.0 | 5.02  |
| Q8N8X6 | Golgin subfamily A member 2-like protein 4 OS=Homo sapiens PE=2 SV=1 - [GG2L4_HUMAN]                                        | 9.76  | 1 | 1 | 1 | 1  | 0.93 | 0.97 | 0.81 | 0.85 |      |      |      |      | 164  | 19.8  | 8.84  |
| Q13439 | Golgin subfamily A member 4 OS=Homo sapiens GN=GOLGA4 PE=1 SV=1 - [GOGA4_HUMAN]                                             | 2.74  | 1 | 2 | 3 | 43 | 1.45 | 1.39 | 1.37 | 1.27 | 1.11 | 1.18 | 1.00 | 1.11 | 2230 | 261.0 | 5.39  |
| Q8N7Z2 | Golgin subfamily A member 6-like protein 1 OS=Homo sapiens GN=GOLGA6L1 PE=2 SV=2 - [GG6L1_HUMAN]                            | 4.83  | 1 | 1 | 2 | 4  | 0.69 | 0.23 | 0.48 | 0.16 |      |      |      |      | 621  | 77.0  | 5.36  |
| Q14789 | Golgin subfamily B member 1 OS=Homo sapiens GN=GOLGB1 PE=1 SV=2 - [GOGB1_HUMAN]                                             | 2.73  | 3 | 4 | 6 | 8  | 2.91 | 3.37 | 1.23 | 1.42 | 0.62 | 0.68 | 0.78 | 0.86 | 3259 | 375.8 | 5.00  |
| Q3T8J9 | GON-4-like protein OS=Homo sapiens GN=GON4L PE=1 SV=1 - [GON4L_HUMAN]                                                       | 2.19  | 1 | 2 | 2 | 2  |      |      | 0.78 |      | 1.09 | 0.13 | 0.90 | 0.11 | 2241 | 248.5 | 5.01  |
| Q75T13 | GPI inositol-deacylase OS=Homo sapiens GN=PGAP1 PE=2 SV=1 - [PGAP1_HUMAN]                                                   | 1.95  | 1 | 1 | 1 | 7  | 0.90 | 1.13 | 0.80 | 1.02 | 1.13 | 1.00 | 0.97 | 1.00 | 922  | 105.3 | 9.01  |
| Q9H3S5 | GPI mannosyltransferase 1 OS=Homo sapiens GN=PIGM PE=1 SV=1 - [PIGM_HUMAN]                                                  | 5.44  | 9 | 1 | 2 | 3  | 1.94 | 2.20 | 1.65 | 1.88 | 0.95 | 0.99 | 0.73 | 0.77 | 423  | 49.4  | 9.11  |
| Q92521 | GPI mannosyltransferase 3 OS=Homo sapiens GN=PIGB PE=2 SV=1 - [PIGB_HUMAN]                                                  | 1.99  | 1 | 1 | 1 | 1  | 0.89 | 0.93 | 0.82 | 0.87 |      |      |      |      | 554  | 65.0  | 9.29  |
| Q86VD9 | GPI mannosyltransferase 4 OS=Homo sapiens GN=PIGZ PE=2 SV=4 - [PIGZ_HUMAN]                                                  | 2.42  | 1 | 1 | 1 | 1  |      |      |      |      | 0.84 | 1.09 | 1.67 | 2.15 | 579  | 63.4  | 8.34  |
| Q969N2 | GPI transamidase component PIG-T OS=Homo sapiens GN=PIGT PE=1 SV=1 - [PIGT_HUMAN]                                           | 2.08  | 1 | 1 | 1 | 1  |      |      |      |      | 1.05 | 1.06 | 0.95 | 0.97 | 578  | 65.7  | 8.38  |
| Q6ISB3 | Grainyhead-like protein 2 homolog OS=Homo sapiens GN=GRHL2 PE=1 SV=1 - [GRHL2_HUMAN]                                        | 3.36  | 1 | 2 | 2 | 2  |      |      |      |      | 1.09 | 1.03 | 1.24 | 1.17 | 625  | 71.1  | 6.44  |
| Q96CP6 | GRAM domain-containing protein 1A OS=Homo sapiens GN=GRAMD1A PE=1 SV=2 - [GRM1A_HUMAN]                                      | 2.07  | 1 | 1 | 1 | 1  | 1.71 | 1.23 | 1.49 | 1.07 |      |      |      |      | 724  | 80.6  | 6.74  |
| P28676 | Grancalcin OS=Homo sapiens GN=GCA PE=1 SV=2 - [GRAN_HUMAN]                                                                  | 4.15  | 1 | 1 | 1 | 1  |      |      |      |      | 1.05 | 1.08 | 1.08 | 1.10 | 217  | 24.0  | 5.21  |
| P28799 | Granulins OS=Homo sapiens GN=GRN PE=1 SV=2 - [GRN_HUMAN]                                                                    | 24.62 | 1 | 9 | 9 | 28 | 1.05 | 1.06 | 1.18 | 1.20 | 1.15 | 1.16 | 1.16 | 1.15 | 593  | 63.5  | 6.83  |
| P15509 | Granulocyte-macrophage colony-stimulating factor receptor subunit alpha OS=Homo sapiens GN=CSF2RA PE=1 SV=1 - [CSF2R_HUMAN] | 8.50  | 1 | 2 | 2 | 2  | 1.16 | 1.21 | 1.17 | 1.23 | 1.05 | 1.09 | 1.03 | 1.07 | 400  | 46.2  | 7.75  |
| P51124 | Granzyme M OS=Homo sapiens GN=GZMM PE=1 SV=2 - [GRAM_HUMAN]                                                                 | 5.45  | 1 | 1 | 1 | 1  |      |      |      |      | 0.85 | 0.87 | 0.69 | 0.70 | 257  | 27.5  | 10.13 |
| O75791 | GRB2-related adapter protein 2 OS=Homo sapiens GN=GRAP2 PE=1 SV=1 - [GRAP2_HUMAN]                                           | 19.09 | 3 | 4 | 5 | 9  | 0.86 | 0.50 | 0.73 | 0.42 | 1.26 | 1.29 | 1.22 | 1.21 | 330  | 37.9  | 6.95  |
| Q13588 | GRB2-related adapter protein OS=Homo sapiens GN=GRAP PE=1 SV=1 - [GRAP_HUMAN]                                               | 5.99  | 3 | 1 | 2 | 3  | 1.01 | 0.99 | 0.99 | 0.98 |      |      |      |      | 217  | 25.3  | 7.03  |
| Q8IWJ2 | GRIP and coiled-coil domain-containing protein 2 OS=Homo sapiens GN=GCC2 PE=1 SV=4 - [GCC2_HUMAN]                           | 4.04  | 4 | 4 | 6 | 6  | 0.93 | 0.98 | 0.86 | 0.91 | 1.35 | 1.43 | 1.23 | 1.30 | 1684 | 195.8 | 5.14  |
| P53816 | Group XVI phospholipase A1/A2 OS=Homo sapiens GN=PLA2G16 PE=1 SV=2 - [PAG16_HUMAN]                                          | 18.52 | 1 | 1 | 1 | 1  | 0.81 | 0.66 | 0.65 | 0.53 |      |      |      |      | 162  | 17.9  | 7.99  |

|        |                                                                                                                    |       |   |   |   |    |      |      |      |      |      |      |      |      |      |      |      |       |      |
|--------|--------------------------------------------------------------------------------------------------------------------|-------|---|---|---|----|------|------|------|------|------|------|------|------|------|------|------|-------|------|
| P62993 | Growth factor receptor-bound protein 2 OS=Homo sapiens GN=GRB2 PE=1 SV=1 - [GRB2_HUMAN]                            | 13.36 | 1 | 3 | 3 | 7  |      |      |      |      |      |      | 0.85 | 0.86 | 0.88 | 0.90 | 217  | 25.2  | 6.32 |
| Q92847 | Growth hormone secretagogue receptor type 1 OS=Homo sapiens GN=GHSR PE=1 SV=1 - [GHSR_HUMAN]                       | 3.83  | 1 | 1 | 1 | 2  |      |      |      |      |      |      | 0.22 | 0.22 | 0.69 | 0.67 | 366  | 41.3  | 8.31 |
| Q9UK05 | Growth/differentiation factor 2 OS=Homo sapiens GN=GDF2 PE=1 SV=1 - [GDF2_HUMAN]                                   | 3.96  | 1 | 1 | 1 | 1  | 0.60 | 0.81 | 0.68 | 0.93 |      |      |      |      |      |      | 429  | 47.3  | 6.48 |
| O14793 | Growth/differentiation factor 8 OS=Homo sapiens GN=MSTN PE=1 SV=1 - [GDF8_HUMAN]                                   | 8.53  | 7 | 2 | 3 | 12 |      |      |      |      |      |      | 0.80 | 0.79 | 0.89 | 0.88 | 375  | 42.7  | 6.76 |
| Q9H4S2 | GS homeobox 1 OS=Homo sapiens GN=GSX1 PE=2 SV=1 - [GSX1_HUMAN]                                                     | 6.82  | 1 | 1 | 1 | 1  |      |      |      |      |      |      | 1.12 | 1.24 | 1.10 | 1.21 | 264  | 27.9  | 8.92 |
| P62826 | GTP-binding nuclear protein Ran OS=Homo sapiens GN=RAN PE=1 SV=3 - [RAN_HUMAN]                                     | 10.65 | 1 | 2 | 2 | 3  | 0.87 | 0.84 | 0.88 | 0.86 | 0.83 | 1.02 | 1.10 | 1.37 |      |      | 216  | 24.4  | 7.49 |
| Q15382 | GTP-binding protein Rheb OS=Homo sapiens GN=RHEB PE=1 SV=1 - [RHEB_HUMAN]                                          | 5.43  | 1 | 1 | 1 | 2  | 0.96 | 0.93 | 0.97 | 0.94 |      |      |      |      |      |      | 184  | 20.5  | 5.92 |
| Q9Y6B6 | GTP-binding protein SAR1b OS=Homo sapiens GN=SAR1B PE=1 SV=1 - [SAR1B_HUMAN]                                       | 8.08  | 1 | 1 | 1 | 1  | 1.24 | 1.51 | 0.98 | 1.19 |      |      |      |      |      |      | 198  | 22.4  | 6.11 |
| Q9UIJ7 | GTP-AMP phosphotransferase, mitochondrial OS=Homo sapiens GN=AK3 PE=1 SV=4 - [KAD3_HUMAN]                          | 3.52  | 1 | 1 | 1 | 1  |      |      |      |      |      |      | 1.33 | 1.54 | 0.97 | 1.12 | 227  | 25.5  | 9.16 |
| Q14C86 | GTPase-activating protein and VPS9 domain-containing protein 1 OS=Homo sapiens GN=GAPVD1 PE=1 SV=2 - [GAPD1_HUMAN] | 1.89  | 1 | 1 | 1 | 1  | 2.27 | 1.05 | 2.48 | 1.15 |      |      |      |      |      |      | 1478 | 164.9 | 5.22 |
| Q9Y2T3 | Guanine deaminase OS=Homo sapiens GN=GDA PE=1 SV=1 - [GUAD_HUMAN]                                                  | 6.39  | 1 | 3 | 3 | 6  | 0.97 | 1.13 | 1.06 | 1.25 | 0.88 | 0.11 | 0.87 | 0.08 |      |      | 454  | 51.0  | 5.68 |
| P04899 | Guanine nucleotide-binding protein G(i) subunit alpha-2 OS=Homo sapiens GN=GNAI2 PE=1 SV=3 - [GNAI2_HUMAN]         | 3.66  | 1 | 1 | 1 | 2  | 0.78 | 0.88 | 0.80 | 0.91 |      |      |      |      |      |      | 355  | 40.4  | 5.54 |
| P62873 | Guanine nucleotide-binding protein G(i)/G(s)/G(t) subunit beta-1 OS=Homo sapiens GN=GNB1 PE=1 SV=3 - [GBB1_HUMAN]  | 5.88  | 3 | 2 | 2 | 5  | 0.79 | 0.93 | 0.79 | 0.98 | 0.76 | 0.83 | 0.75 | 0.83 |      |      | 340  | 37.4  | 6.00 |
| P50148 | Guanine nucleotide-binding protein G(q) subunit alpha OS=Homo sapiens GN=GNAQ PE=1 SV=4 - [GNAQ_HUMAN]             | 5.29  | 1 | 1 | 1 | 1  |      |      |      |      |      |      | 0.78 | 0.88 | 0.98 | 1.11 | 359  | 42.1  | 5.68 |
| P19086 | Guanine nucleotide-binding protein G(z) subunit alpha OS=Homo sapiens GN=GNAZ PE=2 SV=3 - [GNAZ_HUMAN]             | 3.38  | 1 | 1 | 1 | 1  |      |      |      |      |      |      | 0.81 | 0.80 | 0.82 | 0.81 | 355  | 40.9  | 7.61 |
| Q03113 | Guanine nucleotide-binding protein subunit alpha-12 OS=Homo sapiens GN=GNA12 PE=1 SV=4 - [GNA12_HUMAN]             | 5.77  | 1 | 2 | 2 | 2  | 0.76 | 0.89 | 0.78 | 0.92 | 0.84 | 1.05 | 0.87 | 1.08 |      |      | 381  | 44.3  | 9.83 |
| Q14344 | Guanine nucleotide-binding protein subunit alpha-13 OS=Homo sapiens GN=GNA13 PE=1 SV=2 - [GNA13_HUMAN]             | 3.98  | 1 | 1 | 1 | 1  |      |      |      |      |      |      | 0.71 | 0.69 | 0.88 | 0.85 | 377  | 44.0  | 8.00 |
| P30679 | Guanine nucleotide-binding protein subunit alpha-15 OS=Homo sapiens GN=GNA15 PE=2 SV=2 - [GNA15_HUMAN]             | 2.67  | 1 | 1 | 1 | 1  | 0.65 | 0.64 | 0.70 | 0.69 |      |      |      |      |      |      | 374  | 43.5  | 8.51 |
| Q9HAV0 | Guanine nucleotide-binding protein subunit beta-4 OS=Homo sapiens GN=GNB4 PE=1 SV=3 - [GBB4_HUMAN]                 | 6.76  | 1 | 1 | 1 | 1  |      |      |      |      |      |      | 0.97 | 0.93 | 1.48 | 1.43 | 340  | 37.5  | 6.00 |
| P36915 | Guanine nucleotide-binding protein-like 1 OS=Homo sapiens GN=GNL1 PE=1 SV=2 - [GNL1_HUMAN]                         | 2.80  | 1 | 1 | 1 | 2  | 3.04 | 4.21 | 3.14 | 4.36 |      |      |      |      |      |      | 607  | 68.6  | 5.80 |
| Q9BVP2 | Guanine nucleotide-binding protein-like 3 OS=Homo sapiens GN=GNL3 PE=1 SV=2 - [GNL3_HUMAN]                         | 2.73  | 1 | 1 | 1 | 1  |      |      |      |      |      |      | 0.39 | 0.15 | 1.33 | 0.52 | 549  | 62.0  | 9.16 |
| Q9NVN8 | Guanine nucleotide-binding protein-like 3-like protein OS=Homo sapiens GN=GNL3L PE=1 SV=1 - [GNL3L_HUMAN]          | 2.92  | 1 | 1 | 1 | 2  | 0.80 | 0.91 | 0.70 | 0.80 | 0.81 | 1.25 | 0.56 | 0.87 |      |      | 582  | 65.5  | 8.44 |
| Q02108 | Guanylate cyclase soluble subunit alpha-3 OS=Homo sapiens GN=GUCY1A3 PE=1 SV=2 - [GCYA3_HUMAN]                     | 7.25  | 1 | 2 | 2 | 2  | 0.30 | 0.32 | 0.34 | 0.36 | 0.77 | 0.74 | 0.86 | 0.83 |      |      | 690  | 77.4  | 7.11 |
| Q16774 | Guanylate kinase OS=Homo sapiens GN=GUK1 PE=1 SV=2 - [KGUA_HUMAN]                                                  | 3.05  | 1 | 1 | 1 | 1  |      |      |      |      |      |      | 0.75 | 0.07 | 1.51 | 0.14 | 197  | 21.7  | 6.55 |
| Q96PP9 | Guanylate-binding protein 4 OS=Homo sapiens GN=GBP4 PE=1 SV=2 - [GBP4_HUMAN]                                       | 1.09  | 1 | 1 | 1 | 1  |      |      |      |      |      |      | 0.63 | 1.01 | 1.56 | 2.51 | 640  | 73.1  | 6.02 |
| Q96PP8 | Guanylate-binding protein 5 OS=Homo sapiens GN=GBP5 PE=2 SV=1 - [GBP5_HUMAN]                                       | 2.39  | 1 | 1 | 1 | 1  |      |      |      |      |      |      | 0.92 | 0.89 | 0.87 | 0.84 | 586  | 66.6  | 5.55 |
| Q02747 | Guanylin OS=Homo sapiens GN=GUCA2A PE=1 SV=2 - [GUC2A_HUMAN]                                                       | 9.57  | 1 | 1 | 1 | 2  |      |      |      |      |      |      | 0.75 | 0.74 | 0.85 | 0.83 | 115  | 12.4  | 4.59 |

|        |                                                                                                 |       |   |    |    |      |      |      |      |      |      |      |      |      |      |       |      |
|--------|-------------------------------------------------------------------------------------------------|-------|---|----|----|------|------|------|------|------|------|------|------|------|------|-------|------|
| Q9NXP7 | Gypsy retrotransposon integrase-like protein 1 OS=Homo sapiens GN=GIN1 PE=2 SV=3 - [GIN1_HUMAN] | 8.81  | 1 | 2  | 2  | 12   | 0.71 | 1.08 | 0.64 | 0.98 | 0.82 | 0.74 | 0.99 | 0.90 | 522  | 59.8  | 7.97 |
| Q92574 | Hamartin OS=Homo sapiens GN=TSC1 PE=1 SV=2 - [TSC1_HUMAN]                                       | 0.52  | 1 | 1  | 1  | 1    | 0.34 | 0.38 | 1.25 | 1.42 |      |      |      |      | 1164 | 129.7 | 6.47 |
| P00738 | Haptoglobin OS=Homo sapiens GN=HP PE=1 SV=1 - [HPT_HUMAN]                                       | 69.70 | 3 | 23 | 43 | 6211 | 1.19 | 1.18 | 1.20 | 1.18 | 1.03 | 1.05 | 0.99 | 1.03 | 406  | 45.2  | 6.58 |
| P00739 | Haptoglobin-related protein OS=Homo sapiens GN=HPR PE=1 SV=2 - [HPTR_HUMAN]                     | 68.68 | 3 | 10 | 31 | 3042 | 1.04 | 1.07 | 1.07 | 1.12 | 1.12 | 1.12 | 1.01 | 1.03 | 348  | 39.0  | 7.09 |
| Q68CZ6 | HAUS augmin-like complex subunit 3 OS=Homo sapiens GN=HAUS3 PE=1 SV=1 - [HAUS3_HUMAN]           | 1.66  | 1 | 1  | 1  | 2    |      |      |      |      | 1.24 | 0.78 | 1.17 | 0.73 | 603  | 69.6  | 5.55 |
| Q7Z4H7 | HAUS augmin-like complex subunit 6 OS=Homo sapiens GN=HAUS6 PE=1 SV=2 - [HAUS6_HUMAN]           | 1.47  | 1 | 1  | 1  | 1    |      |      |      |      | 0.89 | 1.09 | 0.89 | 1.09 | 955  | 108.6 | 6.47 |
| Q9BT25 | HAUS augmin-like complex subunit 8 OS=Homo sapiens GN=HAUS8 PE=1 SV=3 - [HAUS8_HUMAN]           | 7.32  | 1 | 1  | 2  | 3    |      |      |      |      | 0.79 | 0.69 | 0.94 | 0.82 | 410  | 44.8  | 7.06 |
| Q9Y450 | HBS1-like protein OS=Homo sapiens GN=HBS1L PE=1 SV=1 - [HBS1L_HUMAN]                            | 1.61  | 1 | 1  | 1  | 1    |      |      |      |      | 0.91 | 0.95 | 0.88 | 0.91 | 684  | 75.4  | 6.61 |
| O00165 | HCLS1-associated protein X-1 OS=Homo sapiens GN=HAX1 PE=1 SV=2 - [HAX1_HUMAN]                   | 11.47 | 1 | 1  | 1  | 1    | 0.58 | 0.31 | 0.89 | 0.49 |      |      |      |      | 279  | 31.6  | 4.92 |
| Q53T59 | HCLS1-binding protein 3 OS=Homo sapiens GN=HS1BP3 PE=1 SV=1 - [H1BP3_HUMAN]                     | 4.85  | 1 | 1  | 1  | 1    |      |      |      |      | 1.10 | 1.26 | 1.57 | 1.79 | 392  | 42.8  | 5.01 |
| Q9H583 | HEAT repeat-containing protein 1 OS=Homo sapiens GN=HEATR1 PE=1 SV=3 - [HEAT1_HUMAN]            | 1.96  | 1 | 2  | 2  | 2    | 1.03 | 0.80 | 1.05 | 0.82 |      |      |      |      | 2144 | 242.2 | 6.54 |
| Q86Y56 | HEAT repeat-containing protein 2 OS=Homo sapiens GN=HEATR2 PE=1 SV=4 - [HEAT2_HUMAN]            | 1.29  | 1 | 1  | 1  | 1    |      |      |      |      | 0.69 | 0.66 | 0.84 | 0.80 | 855  | 93.5  | 6.42 |
| Q86WZ0 | HEAT repeat-containing protein 4 OS=Homo sapiens GN=HEATR4 PE=1 SV=2 - [HEAT4_HUMAN]            | 4.09  | 1 | 2  | 2  | 2    |      |      |      |      | 1.04 | 0.91 | 0.75 | 0.66 | 1026 | 117.1 | 9.11 |
| Q86XA9 | HEAT repeat-containing protein 5A OS=Homo sapiens GN=HEATR5A PE=1 SV=2 - [HTR5A_HUMAN]          | 1.91  | 1 | 2  | 2  | 2    | 1.51 | 1.46 | 1.21 | 1.17 | 1.05 | 1.04 | 1.09 | 1.07 | 2040 | 221.9 | 6.58 |
| Q8NDA8 | HEAT repeat-containing protein 7A OS=Homo sapiens GN=HEATR7A PE=1 SV=3 - [HTR7A_HUMAN]          | 0.61  | 1 | 1  | 1  | 1    |      |      |      |      | 4.11 | 2.82 | 4.12 | 2.82 | 1641 | 181.1 | 6.89 |
| A6NES4 | HEAT repeat-containing protein 7B1 OS=Homo sapiens GN=HEATR7B1 PE=4 SV=3 - [HTRB1_HUMAN]        | 0.64  | 1 | 1  | 1  | 2    | 0.98 | 0.71 | 1.03 | 0.75 |      |      |      |      | 1706 | 193.1 | 6.68 |
| Q7Z745 | HEAT repeat-containing protein 7B2 OS=Homo sapiens GN=HEATR7B2 PE=2 SV=3 - [HTRB2_HUMAN]        | 1.83  | 4 | 1  | 2  | 4    | 0.63 | 0.99 | 0.61 | 0.96 |      |      |      |      | 1585 | 180.7 | 6.28 |
| Q68CQ1 | HEAT repeat-containing protein 8 OS=Homo sapiens GN=HEATR8 PE=2 SV=4 - [HEAT8_HUMAN]            | 0.91  | 1 | 1  | 1  | 2    | 0.69 | 0.86 | 0.84 | 1.05 |      |      |      |      | 1323 | 145.6 | 6.96 |
| P34931 | Heat shock 70 kDa protein 1-like OS=Homo sapiens GN=HSPA1L PE=1 SV=2 - [HS71L_HUMAN]            | 12.79 | 1 | 2  | 8  | 21   | 1.07 | 1.04 | 0.93 | 0.91 |      |      |      |      | 641  | 70.3  | 6.02 |
| P08107 | Heat shock 70 kDa protein 1A/1B OS=Homo sapiens GN=HSPA1A PE=1 SV=5 - [HSP71_HUMAN]             | 17.94 | 1 | 3  | 11 | 30   | 0.96 | 0.97 | 0.90 | 0.91 | 0.71 | 0.77 | 0.75 | 0.82 | 641  | 70.0  | 5.66 |
| P17066 | Heat shock 70 kDa protein 6 OS=Homo sapiens GN=HSPA6 PE=1 SV=2 - [HSP76_HUMAN]                  | 11.04 | 1 | 1  | 6  | 19   |      |      |      |      | 0.58 | 0.51 | 1.04 | 0.92 | 643  | 71.0  | 6.14 |
| P11142 | Heat shock cognate 71 kDa protein OS=Homo sapiens GN=HSPA8 PE=1 SV=1 - [HSP7C_HUMAN]            | 19.97 | 1 | 5  | 12 | 30   | 0.71 | 0.68 | 0.73 | 0.71 | 1.10 | 1.06 | 1.11 | 1.06 | 646  | 70.9  | 5.52 |
| Q92598 | Heat shock protein 105 kDa OS=Homo sapiens GN=HSPH1 PE=1 SV=1 - [HS105_HUMAN]                   | 1.98  | 1 | 1  | 1  | 1    |      |      |      |      | 1.07 | 1.05 | 1.10 | 1.08 | 858  | 96.8  | 5.39 |
| Q12931 | Heat shock protein 75 kDa, mitochondrial OS=Homo sapiens GN=TRAP1 PE=1 SV=3 - [TRAP1_HUMAN]     | 5.40  | 2 | 2  | 3  | 28   | 0.97 | 1.02 | 0.83 | 0.90 |      |      |      |      | 704  | 80.1  | 8.21 |
| P04792 | Heat shock protein beta-1 OS=Homo sapiens GN=HSPB1 PE=1 SV=2 - [HSPB1_HUMAN]                    | 31.22 | 1 | 6  | 6  | 21   | 0.67 | 0.60 | 0.60 | 0.52 | 1.15 | 1.23 | 1.21 | 1.25 | 205  | 22.8  | 6.40 |
| Q9Y547 | Heat shock protein beta-11 OS=Homo sapiens GN=HSPB11 PE=1 SV=1 - [HSB11_HUMAN]                  | 7.64  | 1 | 1  | 1  | 3    |      |      |      |      | 0.91 | 1.01 | 0.96 | 1.07 | 144  | 16.3  | 5.03 |
| Q9BQS6 | Heat shock protein beta-9 OS=Homo sapiens GN=HSPB9 PE=1 SV=1 - [HSPB9_HUMAN]                    | 26.42 | 1 | 1  | 1  | 1    | 1.63 | 1.07 | 1.40 | 0.93 |      |      |      |      | 159  | 17.5  | 8.87 |

|        |                                                                                                             |       |    |    |    |      |      |      |      |      |      |      |      |      |      |       |      |      |     |      |      |
|--------|-------------------------------------------------------------------------------------------------------------|-------|----|----|----|------|------|------|------|------|------|------|------|------|------|-------|------|------|-----|------|------|
| P54652 | Heat shock-related 70 kDa protein 2 OS=Homo sapiens GN=HSPA2 PE=1 SV=1 - [HSP72_HUMAN]                      | 11.74 | 1  | 1  | 7  | 18   |      |      |      |      |      |      |      |      | 0.33 | 0.26  | 0.81 | 0.65 | 639 | 70.0 | 5.74 |
| Q96QV1 | Hedgehog-interacting protein OS=Homo sapiens GN=HHIP PE=1 SV=3 - [HHIP_HUMAN]                               | 2.43  | 1  | 1  | 2  | 60   | 0.68 | 0.80 | 0.87 | 1.02 | 1.85 | 2.21 | 1.74 | 2.03 | 700  | 78.8  | 7.90 |      |     |      |      |
| Q9H910 | Hematological and neurological expressed 1-like protein OS=Homo sapiens GN=HN1L PE=1 SV=1 - [HN1L_HUMAN]    | 8.95  | 1  | 1  | 1  | 1    | 0.74 | 1.03 | 0.82 | 1.15 |      |      |      |      | 190  | 20.1  | 9.26 |      |     |      |      |
| P09601 | Heme oxygenase 1 OS=Homo sapiens GN=HMOX1 PE=1 SV=1 - [HMOX1_HUMAN]                                         | 7.99  | 1  | 2  | 2  | 2    | 0.70 | 0.98 | 0.76 | 1.18 |      |      |      |      | 288  | 32.8  | 8.25 |      |     |      |      |
| Q9Y5Z4 | Heme-binding protein 2 OS=Homo sapiens GN=HEBP2 PE=1 SV=1 - [HEBP2_HUMAN]                                   | 16.59 | 1  | 2  | 2  | 4    |      |      |      |      | 0.94 | 1.01 | 0.92 | 1.00 | 205  | 22.9  | 4.63 |      |     |      |      |
| Q96RW7 | Hemicentin-1 OS=Homo sapiens GN=HMCN1 PE=1 SV=2 - [HMCN1_HUMAN]                                             | 0.82  | 1  | 2  | 2  | 3    |      |      |      |      | 0.79 | 0.68 | 0.89 | 0.77 | 5635 | 613.0 | 6.49 |      |     |      |      |
| Q8NDA2 | Hemicentin-2 OS=Homo sapiens GN=HMCN2 PE=2 SV=2 - [HMCN2_HUMAN]                                             | 1.11  | 5  | 3  | 4  | 7    | 1.24 | 0.77 | 1.05 | 0.66 | 0.88 | 0.76 | 0.96 | 0.79 | 5065 | 542.3 | 5.83 |      |     |      |      |
| P69905 | Hemoglobin subunit alpha OS=Homo sapiens GN=HBA1 PE=1 SV=2 - [HBA_HUMAN]                                    | 70.42 | 2  | 9  | 9  | 747  | 0.64 | 0.58 | 0.58 | 0.57 | 0.71 | 0.70 | 0.68 | 0.69 | 142  | 15.2  | 8.68 |      |     |      |      |
| P68871 | Hemoglobin subunit beta OS=Homo sapiens GN=HBB PE=1 SV=2 - [HBB_HUMAN]                                      | 89.80 | 2  | 8  | 14 | 1707 | 0.57 | 0.54 | 0.51 | 0.48 | 0.70 | 0.73 | 0.69 | 0.69 | 147  | 16.0  | 7.28 |      |     |      |      |
| P02042 | Hemoglobin subunit delta OS=Homo sapiens GN=HBD PE=1 SV=2 - [HBD_HUMAN]                                     | 89.80 | 2  | 8  | 14 | 761  | 0.56 | 0.57 | 0.52 | 0.52 | 0.85 | 0.84 | 0.86 | 0.84 | 147  | 16.0  | 8.05 |      |     |      |      |
| P69891 | Hemoglobin subunit gamma-1 OS=Homo sapiens GN=HBG1 PE=1 SV=2 - [HBG1_HUMAN]                                 | 50.34 | 2  | 1  | 7  | 75   |      |      |      |      | 1.15 | 1.01 | 1.33 | 1.16 | 147  | 16.1  | 7.20 |      |     |      |      |
| P69892 | Hemoglobin subunit gamma-2 OS=Homo sapiens GN=HBG2 PE=1 SV=2 - [HBG2_HUMAN]                                 | 50.34 | 2  | 1  | 7  | 81   |      |      |      |      | 0.59 | 0.61 | 0.69 | 0.66 | 147  | 16.1  | 7.20 |      |     |      |      |
| P02790 | Hemopexin OS=Homo sapiens GN=HPX PE=1 SV=2 - [HEMO_HUMAN]                                                   | 81.39 | 2  | 44 | 44 | 5743 | 1.21 | 1.18 | 1.18 | 1.15 | 1.01 | 1.00 | 0.99 | 1.00 | 462  | 51.6  | 7.02 |      |     |      |      |
| Q8IZT8 | Heparan sulfate glucosamine 3-O-sulfotransferase 5 OS=Homo sapiens GN=HS3ST5 PE=1 SV=1 - [HS3S5_HUMAN]      | 5.20  | 1  | 2  | 2  | 3    | 1.09 | 1.07 | 1.10 | 1.09 | 1.00 | 0.62 | 1.16 | 0.72 | 346  | 40.4  | 9.79 |      |     |      |      |
| Q9Y251 | Heparanase OS=Homo sapiens GN=HPSE PE=1 SV=2 - [HPSE_HUMAN]                                                 | 6.63  | 1  | 3  | 3  | 17   | 1.22 | 1.28 | 1.23 | 1.29 | 1.97 | 1.82 | 1.78 | 1.64 | 543  | 61.1  | 9.28 |      |     |      |      |
| P05546 | Heparin cofactor 2 OS=Homo sapiens GN=SERPIND1 PE=1 SV=3 - [HEP2_HUMAN]                                     | 65.93 | 1  | 29 | 29 | 643  | 1.12 | 1.17 | 1.12 | 1.14 | 1.05 | 1.06 | 1.01 | 1.01 | 499  | 57.0  | 6.90 |      |     |      |      |
| P11150 | Hepatic triacylglycerol lipase OS=Homo sapiens GN=LIPC PE=1 SV=3 - [LIPC_HUMAN]                             | 3.41  | 1  | 1  | 1  | 2    | 0.86 | 1.18 | 0.89 | 1.22 |      |      |      |      | 499  | 55.9  | 9.04 |      |     |      |      |
| Q04756 | Hepatocyte growth factor activator OS=Homo sapiens GN=HGFA PE=1 SV=1 - [HGFA_HUMAN]                         | 31.45 | 1  | 16 | 16 | 123  | 1.23 | 1.20 | 1.21 | 1.21 | 1.12 | 1.09 | 1.09 | 1.09 | 655  | 70.6  | 7.24 |      |     |      |      |
| P08581 | Hepatocyte growth factor receptor OS=Homo sapiens GN=MET PE=1 SV=4 - [MET_HUMAN]                            | 3.38  | 1  | 3  | 3  | 4    |      |      |      |      | 1.01 | 1.11 | 1.04 | 1.11 | 1390 | 155.4 | 7.33 |      |     |      |      |
| P26927 | Hepatocyte growth factor-like protein OS=Homo sapiens GN=MST1 PE=1 SV=2 - [HGFL_HUMAN]                      | 47.96 | 2  | 26 | 26 | 214  | 1.18 | 1.18 | 1.14 | 1.14 | 1.05 | 1.09 | 1.04 | 1.07 | 711  | 80.3  | 7.68 |      |     |      |      |
| O14964 | Hepatocyte growth factor-regulated tyrosine kinase substrate OS=Homo sapiens GN=HGS PE=1 SV=1 - [HGS_HUMAN] | 1.67  | 1  | 1  | 2  | 9    |      |      |      |      | 1.20 | 1.21 | 1.22 | 1.30 | 777  | 86.1  | 6.16 |      |     |      |      |
| P55317 | Hepatocyte nuclear factor 3-alpha OS=Homo sapiens GN=FOXA1 PE=1 SV=2 - [FOXA1_HUMAN]                        | 3.81  | 1  | 1  | 1  | 15   | 1.01 | 0.89 | 1.09 | 0.95 | 1.41 | 1.23 | 1.44 | 1.25 | 472  | 49.1  | 8.82 |      |     |      |      |
| P51858 | Hepatoma-derived growth factor OS=Homo sapiens GN=HDGF PE=1 SV=1 - [HDGF_HUMAN]                             | 3.33  | 1  | 1  | 1  | 3    |      |      |      |      | 1.54 | 1.51 | 1.40 | 1.36 | 240  | 26.8  | 4.73 |      |     |      |      |
| P81172 | Hepcidin OS=Homo sapiens GN=HAMP PE=1 SV=2 - [HEPC_HUMAN]                                                   | 7.14  | 1  | 1  | 1  | 1    |      |      |      |      | 0.89 | 1.04 | 0.98 | 1.15 | 84   | 9.4   | 8.81 |      |     |      |      |
| Q9BQS7 | Hephaestin OS=Homo sapiens GN=HEPH PE=2 SV=3 - [HEPH_HUMAN]                                                 | 0.78  | 1  | 1  | 1  | 1    | 0.82 | 1.08 | 0.92 | 1.23 |      |      |      |      | 1158 | 130.4 | 5.99 |      |     |      |      |
| Q9UPZ3 | Hermansky-Pudlak syndrome 5 protein OS=Homo sapiens GN=HPS5 PE=1 SV=2 - [HPS5_HUMAN]                        | 0.97  | 1  | 1  | 1  | 1    |      |      |      |      | 0.98 | 1.16 | 0.79 | 0.93 | 1129 | 127.4 | 5.54 |      |     |      |      |
| P63135 | HERV-K_1q22 provirus ancestral Pol protein OS=Homo sapiens PE=3 SV=1 - [POK12_HUMAN]                        | 5.48  | 14 | 1  | 3  | 3    | 1.14 | 1.08 | 1.02 | 0.98 |      |      |      |      | 1459 | 165.1 | 8.88 |      |     |      |      |

|        |                                                                                                                                       |       |   |    |    |      |      |      |      |      |      |      |      |      |      |       |       |
|--------|---------------------------------------------------------------------------------------------------------------------------------------|-------|---|----|----|------|------|------|------|------|------|------|------|------|------|-------|-------|
| O42043 | HERV-K_1q23.3 provirus ancestral Env polyprotein OS=Homo sapiens PE=1 SV=2 - [ENK7_HUMAN]                                             | 7.50  | 4 | 2  | 3  | 3    | 0.70 | 1.45 | 0.74 | 1.53 | 1.03 | 0.72 | 1.38 | 0.98 | 560  | 63.6  | 7.71  |
| Q99729 | Heterogeneous nuclear ribonucleoprotein A/B OS=Homo sapiens GN=HNRNPAB PE=1 SV=2 - [ROAA_HUMAN]                                       | 9.94  | 1 | 1  | 1  | 1    | 0.88 | 0.83 | 1.04 | 0.97 |      |      |      |      | 332  | 36.2  | 8.21  |
| P31943 | Heterogeneous nuclear ribonucleoprotein H OS=Homo sapiens GN=HNRNPH1 PE=1 SV=4 - [HNRH1_HUMAN]                                        | 8.02  | 3 | 2  | 2  | 4    |      |      |      |      | 1.92 | 1.17 | 1.52 | 1.17 | 449  | 49.2  | 6.30  |
| P61978 | Heterogeneous nuclear ribonucleoprotein K OS=Homo sapiens GN=HNRNPK PE=1 SV=1 - [HNRPK_HUMAN]                                         | 4.32  | 1 | 2  | 2  | 5    |      |      |      |      | 1.38 | 1.33 | 1.30 | 1.25 | 463  | 50.9  | 5.54  |
| O60506 | Heterogeneous nuclear ribonucleoprotein Q OS=Homo sapiens GN=SYNCRIP PE=1 SV=2 - [HNRPQ_HUMAN]                                        | 2.09  | 1 | 1  | 1  | 2    |      |      |      |      | 1.03 | 0.97 | 1.17 | 1.09 | 623  | 69.6  | 8.59  |
| O43390 | Heterogeneous nuclear ribonucleoprotein R OS=Homo sapiens GN=HNRNPR PE=1 SV=1 - [HNRPR_HUMAN]                                         | 2.05  | 1 | 1  | 1  | 3    |      |      |      |      | 0.82 | 0.70 | 0.98 | 0.83 | 633  | 70.9  | 8.13  |
| Q00839 | Heterogeneous nuclear ribonucleoprotein U OS=Homo sapiens GN=HNRNPU PE=1 SV=6 - [HNRPU_HUMAN]                                         | 1.09  | 1 | 1  | 1  | 1    | 0.91 | 0.76 | 0.95 | 0.80 |      |      |      |      | 825  | 90.5  | 6.00  |
| P22626 | Heterogeneous nuclear ribonucleoproteins A2/B1 OS=Homo sapiens GN=HNRNPA2B1 PE=1 SV=2 - [ROA2_HUMAN]                                  | 4.25  | 1 | 1  | 1  | 2    |      |      |      |      | 1.25 | 1.18 | 1.31 | 1.23 | 353  | 37.4  | 8.95  |
| Q9NZJ6 | Hexaprenyldihydroxybenzoate methyltransferase, mitochondrial OS=Homo sapiens GN=COQ3 PE=1 SV=3 - [COQ3_HUMAN]                         | 2.71  | 1 | 1  | 1  | 1    |      |      |      |      | 0.25 | 0.28 | 0.82 | 0.93 | 369  | 41.0  | 7.42  |
| Q8WVB3 | Hexosaminidase D OS=Homo sapiens GN=HEXDC PE=2 SV=3 - [HEXDC_HUMAN]                                                                   | 3.50  | 1 | 1  | 1  | 1    |      |      |      |      | 0.51 | 0.42 | 0.55 | 0.45 | 486  | 53.8  | 5.97  |
| Q96JK4 | HHIP-like protein 1 OS=Homo sapiens GN=HHIPL1 PE=2 SV=2 - [HHIPL1_HUMAN]                                                              | 4.09  | 1 | 2  | 2  | 2    | 1.10 | 1.07 | 1.11 | 1.10 |      |      |      |      | 782  | 86.7  | 7.58  |
| O95263 | High affinity cAMP-specific and IBMX-insensitive 3',5'-cyclic phosphodiesterase 8B OS=Homo sapiens GN=PDE8B PE=1 SV=2 - [PDE8B_HUMAN] | 2.03  | 2 | 1  | 2  | 4    | 1.34 | 1.10 | 1.39 | 1.16 |      |      |      |      | 885  | 98.9  | 6.83  |
| P82970 | High mobility group nucleosome-binding domain-containing protein 5 OS=Homo sapiens GN=HMGN5 PE=1 SV=1 - [HMGN5_HUMAN]                 | 2.48  | 1 | 1  | 1  | 1    | 0.55 | 0.33 | 0.77 | 0.46 |      |      |      |      | 282  | 31.5  | 4.55  |
| Q96MC6 | Hippocampus abundant transcript 1 protein OS=Homo sapiens GN=HIAT1 PE=2 SV=2 - [HIAT1_HUMAN]                                          | 1.84  | 1 | 1  | 1  | 1    |      |      |      |      | 0.77 | 0.76 | 2.82 | 2.75 | 490  | 53.0  | 8.40  |
| Q9BW71 | HIRA-interacting protein 3 OS=Homo sapiens GN=HIRIP3 PE=1 SV=3 - [HIRIP3_HUMAN]                                                       | 3.42  | 1 | 1  | 2  | 4    |      |      |      |      | 0.94 | 0.72 |      |      | 556  | 61.9  | 8.54  |
| O95568 | Histidine protein methyltransferase 1 homolog OS=Homo sapiens GN=METTL18 PE=1 SV=1 - [MET18_HUMAN]                                    | 4.84  | 1 | 1  | 2  | 23   | 0.94 | 1.31 | 1.01 | 1.42 |      |      |      |      | 372  | 42.1  | 6.76  |
| P49773 | Histidine triad nucleotide-binding protein 1 OS=Homo sapiens GN=HINT1 PE=1 SV=2 - [HINT1_HUMAN]                                       | 21.43 | 1 | 2  | 2  | 5    |      |      |      |      | 0.97 | 0.89 | 1.09 | 0.85 | 126  | 13.8  | 6.95  |
| Q9BX68 | Histidine triad nucleotide-binding protein 2, mitochondrial OS=Homo sapiens GN=HINT2 PE=1 SV=1 - [HINT2_HUMAN]                        | 10.43 | 1 | 1  | 1  | 1    | 1.09 | 1.24 | 1.07 | 1.22 |      |      |      |      | 163  | 17.2  | 9.16  |
| P12081 | Histidine-tRNA ligase, cytoplasmic OS=Homo sapiens GN=HARS PE=1 SV=2 - [SYHC_HUMAN]                                                   | 11.39 | 1 | 2  | 2  | 3    | 1.41 | 1.24 | 1.48 | 1.30 |      |      |      |      | 509  | 57.4  | 5.88  |
| P04196 | Histidine-rich glycoprotein OS=Homo sapiens GN=HRG PE=1 SV=1 - [HRG_HUMAN]                                                            | 52.76 | 1 | 25 | 25 | 1106 | 1.28 | 1.23 | 1.29 | 1.23 | 1.03 | 0.99 | 1.04 | 1.03 | 525  | 59.5  | 7.50  |
| Q92993 | Histone acetyltransferase KAT5 OS=Homo sapiens GN=KAT5 PE=1 SV=2 - [KAT5_HUMAN]                                                       | 2.53  | 1 | 1  | 1  | 1    | 0.94 | 1.16 | 0.98 | 1.22 |      |      |      |      | 513  | 58.5  | 8.48  |
| Q92769 | Histone deacetylase 2 OS=Homo sapiens GN=HDAC2 PE=1 SV=2 - [HDAC2_HUMAN]                                                              | 1.43  | 1 | 1  | 1  | 1    | 1.01 | 1.08 | 0.91 | 0.98 |      |      |      |      | 488  | 55.3  | 5.91  |
| P56524 | Histone deacetylase 4 OS=Homo sapiens GN=HDAC4 PE=1 SV=3 - [HDAC4_HUMAN]                                                              | 2.03  | 1 | 1  | 1  | 9    | 1.02 | 0.96 | 0.98 | 0.93 | 1.11 | 1.34 | 1.06 | 1.29 | 1084 | 119.0 | 6.96  |
| Q9UBN7 | Histone deacetylase 6 OS=Homo sapiens GN=HDAC6 PE=1 SV=2 - [HDAC6_HUMAN]                                                              | 0.99  | 1 | 1  | 1  | 1    |      |      |      |      | 0.69 | 0.87 | 0.64 | 0.80 | 1215 | 131.3 | 5.30  |
| Q9H0E3 | Histone deacetylase complex subunit SAP130 OS=Homo sapiens GN=SAP130 PE=1 SV=1 - [SP130_HUMAN]                                        | 3.44  | 1 | 1  | 1  | 6    | 0.86 | 0.83 | 0.83 | 0.82 |      |      |      |      | 1048 | 110.3 | 9.83  |
| O14607 | Histone demethylase UTY OS=Homo sapiens GN=UTY PE=1 SV=2 - [UTY_HUMAN]                                                                | 0.89  | 1 | 1  | 1  | 1    | 0.88 | 0.98 | 0.90 | 1.00 |      |      |      |      | 1347 | 149.5 | 7.75  |
| P16403 | Histone H1.2 OS=Homo sapiens GN=HIST1H1C PE=1 SV=2 - [H12_HUMAN]                                                                      | 9.86  | 5 | 1  | 2  | 5    |      |      |      |      | 1.89 | 1.81 | 1.78 | 1.71 | 213  | 21.4  | 10.93 |

|        |                                                                                                                             |       |    |   |   |    |      |      |      |      |      |      |      |      |      |       |       |      |      |       |      |     |      |       |  |
|--------|-----------------------------------------------------------------------------------------------------------------------------|-------|----|---|---|----|------|------|------|------|------|------|------|------|------|-------|-------|------|------|-------|------|-----|------|-------|--|
| P16401 | Histone H1.5 OS=Homo sapiens GN=HIST1H1B PE=1 SV=3 - [H15_HUMAN]                                                            | 8.85  | 3  | 1 | 2 | 5  |      |      |      |      |      |      |      |      |      |       |       | 1.75 | 1.47 | 1.63  | 1.38 | 226 | 22.6 | 10.92 |  |
| Q5VVJ2 | Histone H2A deubiquitinase MYSM1 OS=Homo sapiens GN=MYSM1 PE=1 SV=1 - [MYSM1_HUMAN]                                         | 3.62  | 1  | 2 | 2 | 7  | 1.01 | 1.19 | 0.97 | 1.14 | 1.32 | 1.37 | 1.08 | 1.20 | 828  | 95.0  | 5.53  |      |      |       |      |     |      |       |  |
| Q96KK5 | Histone H2A type 1-H OS=Homo sapiens GN=HIST1H2AH PE=1 SV=3 - [H2A1H_HUMAN]                                                 | 27.34 | 13 | 1 | 3 | 19 |      |      |      |      |      |      |      |      |      |       |       |      |      |       |      |     |      |       |  |
| P0C5Y9 | Histone H2A-Bbd type 1 OS=Homo sapiens GN=H2AFB1 PE=2 SV=1 - [H2AB1_HUMAN]                                                  | 10.43 | 2  | 1 | 1 | 3  | 0.47 | 0.43 | 0.50 | 0.46 | 0.94 | 0.83 | 0.96 | 0.86 | 115  | 12.7  | 10.67 |      |      |       |      |     |      |       |  |
| P0C0S5 | Histone H2A.Z OS=Homo sapiens GN=H2AFZ PE=1 SV=2 - [H2AZ_HUMAN]                                                             | 20.31 | 5  | 1 | 3 | 19 |      |      |      |      |      |      |      |      |      |       |       |      |      |       |      |     |      |       |  |
| O60814 | Histone H2B type 1-K OS=Homo sapiens GN=HIST1H2BK PE=1 SV=3 - [H2B1K_HUMAN]                                                 | 19.05 | 15 | 2 | 2 | 26 | 1.00 | 0.85 | 1.06 | 0.91 | 1.71 | 1.71 | 1.69 | 1.69 | 126  | 13.9  | 10.32 |      |      |       |      |     |      |       |  |
| P49450 | Histone H3-like centromeric protein A OS=Homo sapiens GN=CENPA PE=1 SV=1 - [CENPA_HUMAN]                                    | 8.57  | 1  | 1 | 1 | 1  | 1.14 | 1.35 | 1.10 | 1.31 |      |      |      |      | 140  | 16.0  | 11.71 |      |      |       |      |     |      |       |  |
| P68431 | Histone H3.1 OS=Homo sapiens GN=HIST1H3A PE=1 SV=2 - [H31_HUMAN]                                                            | 16.91 | 5  | 4 | 4 | 8  |      |      |      |      |      |      |      |      |      |       |       |      |      |       |      |     |      |       |  |
| P62805 | Histone H4 OS=Homo sapiens GN=HIST1H4A PE=1 SV=2 - [H4_HUMAN]                                                               | 19.42 | 1  | 2 | 2 | 7  | 0.93 | 0.89 | 0.87 | 0.84 | 1.57 | 1.36 | 1.45 | 1.27 | 103  | 11.4  | 11.36 |      |      |       |      |     |      |       |  |
| Q9BQA5 | Histone H4 transcription factor OS=Homo sapiens GN=HINFP PE=1 SV=2 - [HINFP_HUMAN]                                          | 2.51  | 1  | 1 | 1 | 1  |      |      |      |      |      |      |      |      | 0.43 | 0.30  | 1.51  | 1.06 | 517  | 59.6  | 6.19 |     |      |       |  |
| Q9UPP1 | Histone lysine demethylase PHF8 OS=Homo sapiens GN=PHF8 PE=1 SV=3 - [PHF8_HUMAN]                                            | 2.08  | 1  | 1 | 1 | 1  | 5.15 | 3.54 | 1.46 | 1.01 |      |      |      |      | 1060 | 117.8 | 8.72  |      |      |       |      |     |      |       |  |
| Q09028 | Histone-binding protein RBBP4 OS=Homo sapiens GN=RBBP4 PE=1 SV=3 - [RBBP4_HUMAN]                                            | 8.00  | 1  | 1 | 1 | 2  | 0.90 | 1.08 | 0.95 | 1.15 |      |      |      |      | 425  | 47.6  | 4.89  |      |      |       |      |     |      |       |  |
| Q9NR48 | Histone-lysine N-methyltransferase ASH1L OS=Homo sapiens GN=ASH1L PE=1 SV=2 - [ASH1L_HUMAN]                                 | 3.74  | 11 | 5 | 8 | 11 | 1.11 | 1.18 | 1.34 | 1.53 |      |      |      |      | 2969 | 332.6 | 9.39  |      |      |       |      |     |      |       |  |
| Q15910 | Histone-lysine N-methyltransferase EZH2 OS=Homo sapiens GN=EZH2 PE=1 SV=2 - [EZH2_HUMAN]                                    | 0.67  | 1  | 1 | 1 | 1  |      |      |      |      |      |      |      |      | 0.74 | 0.78  | 0.68  | 0.71 | 746  | 85.3  | 7.02 |     |      |       |  |
| Q03164 | Histone-lysine N-methyltransferase MLL OS=Homo sapiens GN=MLL PE=1 SV=5 - [MLL1_HUMAN]                                      | 0.96  | 1  | 2 | 2 | 2  | 0.85 | 0.89 | 0.78 | 0.82 | 0.98 | 1.02 | 0.87 | 0.91 | 3969 | 431.5 | 9.09  |      |      |       |      |     |      |       |  |
| O14686 | Histone-lysine N-methyltransferase MLL2 OS=Homo sapiens GN=MLL2 PE=1 SV=2 - [MLL2_HUMAN]                                    | 0.52  | 1  | 1 | 1 | 1  |      |      |      | 0.84 |      |      |      |      | 5537 | 593.0 | 5.58  |      |      |       |      |     |      |       |  |
| Q8NEZ4 | Histone-lysine N-methyltransferase MLL3 OS=Homo sapiens GN=MLL3 PE=1 SV=3 - [MLL3_HUMAN]                                    | 0.96  | 1  | 3 | 3 | 7  |      |      |      |      |      |      |      |      | 1.52 | 1.43  | 1.39  | 1.31 | 4911 | 541.0 | 6.49 |     |      |       |  |
| Q9UMN6 | Histone-lysine N-methyltransferase MLL4 OS=Homo sapiens GN=WBP7 PE=1 SV=1 - [MLL4_HUMAN]                                    | 0.55  | 1  | 2 | 2 | 2  | 0.37 | 0.47 | 0.41 | 0.54 | 0.73 | 0.90 | 0.82 | 1.01 | 2715 | 293.3 | 8.22  |      |      |       |      |     |      |       |  |
| Q9BZ95 | Histone-lysine N-methyltransferase NSD3 OS=Homo sapiens GN=WHSC1L1 PE=1 SV=1 - [NSD3_HUMAN]                                 | 2.02  | 1  | 1 | 1 | 2  | 0.90 | 0.79 | 0.95 | 0.84 | 1.20 | 1.10 | 1.19 | 1.10 | 1437 | 161.5 | 8.21  |      |      |       |      |     |      |       |  |
| Q9NQV7 | Histone-lysine N-methyltransferase PRDM9 OS=Homo sapiens GN=PRDM9 PE=2 SV=2 - [PRDM9_HUMAN]                                 | 6.38  | 2  | 3 | 3 | 6  | 1.18 | 1.21 | 0.67 | 0.70 | 1.05 | 0.81 | 1.43 | 1.09 | 894  | 103.3 | 9.19  |      |      |       |      |     |      |       |  |
| O15047 | Histone-lysine N-methyltransferase SETD1A OS=Homo sapiens GN=SETD1A PE=1 SV=3 - [SET1A_HUMAN]                               | 1.17  | 1  | 1 | 1 | 1  | 1.71 | 2.40 |      |      |      |      |      |      | 1707 | 185.9 | 5.14  |      |      |       |      |     |      |       |  |
| Q86TU7 | Histone-lysine N-methyltransferase setd3 OS=Homo sapiens GN=SETD3 PE=1 SV=1 - [SETD3_HUMAN]                                 | 1.52  | 1  | 1 | 1 | 1  | 0.90 | 1.01 | 0.88 | 1.00 |      |      |      |      | 594  | 67.2  | 5.96  |      |      |       |      |     |      |       |  |
| Q96T68 | Histone-lysine N-methyltransferase SETDB2 OS=Homo sapiens GN=SETDB2 PE=1 SV=2 - [SETB2_HUMAN]                               | 1.39  | 1  | 1 | 1 | 1  | 1.26 | 1.01 | 1.21 | 0.97 |      |      |      |      | 719  | 81.8  | 7.50  |      |      |       |      |     |      |       |  |
| Q96L73 | Histone-lysine N-methyltransferase, H3 lysine-36 and H4 lysine-20 specific OS=Homo sapiens GN=NSD1 PE=1 SV=1 - [NSD1_HUMAN] | 2.08  | 1  | 3 | 3 | 9  | 0.75 | 0.68 | 0.78 | 0.82 | 1.40 | 1.19 | 1.42 | 1.20 | 2696 | 296.5 | 8.03  |      |      |       |      |     |      |       |  |
| P05534 | HLA class I histocompatibility antigen, A-24 alpha chain OS=Homo sapiens GN=HLA-A PE=1 SV=2 - [1A24_HUMAN]                  | 13.42 | 9  | 1 | 3 | 11 | 2.40 | 2.27 | 2.26 | 2.16 |      |      |      |      | 365  | 40.7  | 6.34  |      |      |       |      |     |      |       |  |
| P16188 | HLA class I histocompatibility antigen, A-30 alpha chain OS=Homo sapiens GN=HLA-A PE=1 SV=2 - [1A30_HUMAN]                  | 15.89 | 23 | 2 | 4 | 15 | 0.97 | 0.85 | 0.95 | 0.84 | 1.04 | 0.93 | 1.00 | 0.89 | 365  | 40.9  | 6.10  |      |      |       |      |     |      |       |  |
| P01889 | HLA class I histocompatibility antigen, B-7 alpha chain OS=Homo sapiens GN=HLA-B PE=1 SV=3 - [1B07_HUMAN]                   | 12.98 | 41 | 1 | 3 | 12 |      |      |      |      |      |      |      |      | 0.84 | 0.83  | 0.99  | 0.98 | 362  | 40.4  | 5.85 |     |      |       |  |

|        |                                                                                                                  |       |   |   |   |    |      |      |      |      |      |      |       |      |     |       |      |
|--------|------------------------------------------------------------------------------------------------------------------|-------|---|---|---|----|------|------|------|------|------|------|-------|------|-----|-------|------|
| Q31612 | HLA class I histocompatibility antigen, B-73 alpha chain<br>OS=Homo sapiens GN=HLA-B PE=1 SV=1 - [1B73_HUMAN]    | 14.05 | 5 | 1 | 3 | 19 |      | 1.01 | 0.85 | 1.02 | 0.85 | 363  | 40.4  | 6.24 |     |       |      |
| P05538 | HLA class II histocompatibility antigen, DQ beta 2 chain<br>OS=Homo sapiens GN=HLA-DQB2 PE=3 SV=2 - [DQB2_HUMAN] | 10.82 | 1 | 1 | 1 | 1  | 1.16 | 2.48 | 1.03 | 2.21 |      | 268  | 30.4  | 6.80 |     |       |      |
| Q30154 | HLA class II histocompatibility antigen, DR beta 5 chain<br>OS=Homo sapiens GN=HLA-DRB5 PE=1 SV=1 - [DRB5_HUMAN] | 4.51  | 1 | 1 | 1 | 1  | 0.68 | 0.74 | 0.69 | 0.75 |      | 266  | 30.0  | 6.93 |     |       |      |
| Q8WY36 | HMG box transcription factor BBX OS=Homo sapiens<br>GN=BBX PE=1 SV=1 - [BBX_HUMAN]                               | 1.49  | 1 | 1 | 1 | 3  | 0.85 | 0.94 | 0.89 | 0.99 | 1.26 | 1.16 | 1.18  | 1.09 | 941 | 105.1 | 8.79 |
| Q12766 | HMG domain-containing protein 3 OS=Homo sapiens<br>GN=HMGXB3 PE=2 SV=2 - [HMGX3_HUMAN]                           | 3.19  | 1 | 3 | 3 | 3  |      | 0.72 | 0.75 | 2.38 | 2.42 | 1538 | 168.2 | 8.05 |     |       |      |
| Q03828 | Homeobox even-skipped homolog protein 2 OS=Homo sapiens<br>GN=EVX2 PE=2 SV=2 - [EVX2_HUMAN]                      | 9.87  | 1 | 1 | 1 | 1  | 2.10 | 1.86 | 1.41 | 1.26 |      | 476  | 47.8  | 8.92 |     |       |      |
| Q6ZNG2 | Homeobox protein DBX2 OS=Homo sapiens GN=DBX2 PE=2 SV=2 - [DBX2_HUMAN]                                           | 9.14  | 1 | 1 | 1 | 4  |      | 0.73 | 0.78 | 0.75 | 0.81 | 339  | 36.5  | 9.35 |     |       |      |
| P19622 | Homeobox protein engrailed-2 OS=Homo sapiens GN=EN2 PE=1 SV=3 - [HME2_HUMAN]                                     | 13.21 | 1 | 2 | 2 | 2  | 0.99 | 2.69 | 0.28 | 0.78 |      | 333  | 34.2  | 9.44 |     |       |      |
| Q14549 | Homeobox protein GBX-1 OS=Homo sapiens GN=GBX1 PE=2 SV=2 - [GBX1_HUMAN]                                          | 3.31  | 1 | 1 | 1 | 3  |      | 1.24 | 0.91 | 1.07 | 0.79 | 363  | 37.6  | 7.53 |     |       |      |
| Q9NP08 | Homeobox protein HMX1 OS=Homo sapiens GN=HMX1 PE=2 SV=2 - [HMX1_HUMAN]                                           | 2.01  | 1 | 1 | 1 | 3  |      | 0.46 | 0.08 | 0.83 | 0.14 | 348  | 36.1  | 6.65 |     |       |      |
| A6NHT5 | Homeobox protein HMX3 OS=Homo sapiens GN=HMX3 PE=2 SV=1 - [HMX3_HUMAN]                                           | 3.64  | 1 | 1 | 1 | 1  |      | 1.06 | 1.11 | 1.03 | 1.07 | 357  | 37.8  | 8.12 |     |       |      |
| P31268 | Homeobox protein Hox-A7 OS=Homo sapiens GN=HOXA7 PE=2 SV=3 - [HXA7_HUMAN]                                        | 6.52  | 1 | 1 | 1 | 2  |      | 0.84 | 0.76 | 0.81 | 0.71 | 230  | 25.3  | 5.36 |     |       |      |
| P09067 | Homeobox protein Hox-B5 OS=Homo sapiens GN=HOXB5 PE=2 SV=3 - [HXB5_HUMAN]                                        | 9.29  | 1 | 1 | 1 | 1  | 1.22 | 1.17 | 1.15 | 1.12 |      | 269  | 29.4  | 8.98 |     |       |      |
| P17482 | Homeobox protein Hox-B9 OS=Homo sapiens GN=HOXB9 PE=1 SV=2 - [HXB9_HUMAN]                                        | 20.00 | 1 | 2 | 2 | 5  | 1.58 | 1.84 | 1.72 | 2.03 | 1.39 | 1.29 | 1.30  | 1.20 | 250 | 28.0  | 8.90 |
| Q9NYD6 | Homeobox protein Hox-C10 OS=Homo sapiens GN=HOXC10 PE=1 SV=2 - [HXC10_HUMAN]                                     | 6.73  | 1 | 2 | 2 | 2  | 0.84 | 0.67 | 0.99 | 0.80 | 0.83 | 1.16 | 0.77  | 1.07 | 342 | 38.0  | 8.18 |
| P09017 | Homeobox protein Hox-C4 OS=Homo sapiens GN=HOXC4 PE=2 SV=2 - [HXC4_HUMAN]                                        | 4.55  | 1 | 1 | 1 | 1  |      | 0.14 | 0.30 | 0.40 | 0.84 | 264  | 29.8  | 9.13 |     |       |      |
| P52952 | Homeobox protein Nkx-2.5 OS=Homo sapiens GN=NKX2-5 PE=1 SV=1 - [NKX25_HUMAN]                                     | 4.32  | 2 | 1 | 1 | 1  | 0.28 | 0.50 | 1.18 | 2.11 |      | 324  | 34.9  | 9.38 |     |       |      |
| A6NCS4 | Homeobox protein Nkx-2.6 OS=Homo sapiens GN=NKX2-6 PE=1 SV=1 - [NKX26_HUMAN]                                     | 8.97  | 1 | 2 | 2 | 2  | 0.78 | 0.60 | 1.09 | 0.84 | 1.16 | 1.22 | 1.11  | 1.17 | 301 | 32.1  | 9.88 |
| Q99801 | Homeobox protein Nkx-3.1 OS=Homo sapiens GN=NKX3-1 PE=1 SV=2 - [NKX31_HUMAN]                                     | 5.98  | 1 | 1 | 1 | 2  | 0.77 | 1.17 | 0.74 | 1.13 |      | 234  | 26.3  | 9.20 |     |       |      |
| P78426 | Homeobox protein Nkx-6.1 OS=Homo sapiens GN=NKX6-1 PE=2 SV=2 - [NKX61_HUMAN]                                     | 3.81  | 1 | 1 | 1 | 1  | 1.22 | 1.40 | 0.96 | 1.12 |      | 367  | 37.8  | 9.45 |     |       |      |
| A6NJ46 | Homeobox protein Nkx-6.3 OS=Homo sapiens GN=NKX6-3 PE=2 SV=1 - [NKX63_HUMAN]                                     | 8.68  | 1 | 1 | 1 | 3  | 0.96 | 1.70 | 0.81 | 1.45 |      | 265  | 28.9  | 9.23 |     |       |      |
| O60393 | Homeobox protein NOBOX OS=Homo sapiens GN=NOBOX PE=1 SV=4 - [NOBOX_HUMAN]                                        | 0.72  | 1 | 1 | 1 | 1  |      | 0.95 | 0.76 | 1.60 | 1.27 | 691  | 73.9  | 6.13 |     |       |      |
| Q5XKR4 | Homeobox protein orthopedia OS=Homo sapiens GN=OTP PE=1 SV=1 - [OTP_HUMAN]                                       | 3.69  | 1 | 1 | 1 | 1  |      | 2.61 | 2.69 | 0.74 | 0.76 | 325  | 34.1  | 9.47 |     |       |      |
| O95343 | Homeobox protein SIX3 OS=Homo sapiens GN=SIX3 PE=1 SV=1 - [SIX3_HUMAN]                                           | 19.58 | 1 | 2 | 2 | 6  |      | 1.46 | 0.19 |      |      | 332  | 35.5  | 8.73 |     |       |      |
| Q9GZN2 | Homeobox protein TGIF2 OS=Homo sapiens GN=TGIF2 PE=1 SV=1 - [TGIF2_HUMAN]                                        | 6.75  | 1 | 1 | 1 | 1  |      | 0.63 | 0.72 | 0.75 | 0.86 | 237  | 25.9  | 7.99 |     |       |      |
| O95231 | Homeobox protein VENTX OS=Homo sapiens GN=VENTX PE=2 SV=1 - [VENTX_HUMAN]                                        | 4.65  | 1 | 1 | 1 | 1  |      | 0.71 | 0.50 | 0.65 | 0.46 | 258  | 27.5  | 9.63 |     |       |      |
| P57058 | Hormonally up-regulated neu tumor-associated kinase<br>OS=Homo sapiens GN=HUNK PE=1 SV=1 - [HUNK_HUMAN]          | 1.40  | 1 | 1 | 1 | 1  |      | 1.09 | 0.99 | 0.86 | 0.79 | 714  | 79.6  | 9.13 |     |       |      |



|        |                                                                                                     |       |   |    |    |       |      |      |      |      |      |      |      |      |  |  |      |      |      |      |      |       |      |
|--------|-----------------------------------------------------------------------------------------------------|-------|---|----|----|-------|------|------|------|------|------|------|------|------|--|--|------|------|------|------|------|-------|------|
| Q05469 | Hormone-sensitive lipase OS=Homo sapiens GN=LIPSE PE=1 SV=4 - [LIPSE_HUMAN]                         | 4.09  | 1 | 2  | 2  | 4     |      |      |      |      |      |      |      |      |  |  | 1.65 | 1.50 | 1.66 | 1.51 | 1076 | 116.5 | 6.70 |
| Q96KN8 | HRAS-like suppressor 5 OS=Homo sapiens GN=HRASLS5 PE=2 SV=2 - [HRASLS5_HUMAN]                       | 4.30  | 1 | 1  | 1  | 5     | 1.05 | 0.88 | 0.99 | 0.85 |      |      |      |      |  |  |      |      |      |      | 279  | 30.3  | 8.24 |
| P50502 | Hsc70-interacting protein OS=Homo sapiens GN=ST13 PE=1 SV=2 - [F10A1_HUMAN]                         | 15.72 | 3 | 5  | 5  | 11    | 0.69 | 0.67 | 0.66 | 0.64 | 0.95 | 1.01 | 0.96 | 0.97 |  |  |      |      |      |      | 369  | 41.3  | 5.27 |
| Q9NZL4 | Hsp70-binding protein 1 OS=Homo sapiens GN=HSPBP1 PE=1 SV=1 - [HPBP1_HUMAN]                         | 2.49  | 1 | 1  | 1  | 1     | 0.55 | 0.61 | 0.49 | 0.55 |      |      |      |      |  |  |      |      |      |      | 362  | 39.4  | 5.21 |
| P42858 | Huntingtin OS=Homo sapiens GN=HTT PE=1 SV=2 - [HTT_HUMAN]                                           | 0.83  | 1 | 2  | 2  | 2     | 0.89 | 0.86 | 0.91 | 0.87 |      |      |      |      |  |  |      |      |      |      | 3142 | 347.4 | 6.20 |
| O00291 | Huntingtin-interacting protein 1 OS=Homo sapiens GN=HIP1 PE=1 SV=5 - [HIP1_HUMAN]                   | 2.60  | 1 | 1  | 2  | 2     |      |      |      |      | 0.95 | 0.92 | 0.88 | 0.85 |  |  |      |      |      |      | 1037 | 116.1 | 5.30 |
| Q86UW8 | Hyaluronan and proteoglycan link protein 4 OS=Homo sapiens GN=HAPLN4 PE=2 SV=1 - [HAPLN4_HUMAN]     | 2.49  | 1 | 1  | 1  | 1     |      |      |      |      | 1.03 | 0.17 | 1.09 | 0.18 |  |  |      |      |      |      | 402  | 42.8  | 8.85 |
| Q92819 | Hyaluronan synthase 2 OS=Homo sapiens GN=HAS2 PE=2 SV=1 - [HAS2_HUMAN]                              | 4.53  | 1 | 2  | 2  | 2     | 0.92 | 0.97 | 0.88 | 0.94 | 0.73 | 0.09 | 0.88 | 0.11 |  |  |      |      |      |      | 552  | 63.5  | 8.60 |
| Q14520 | Hyaluronan-binding protein 2 OS=Homo sapiens GN=HABP2 PE=1 SV=1 - [HABP2_HUMAN]                     | 26.61 | 1 | 14 | 14 | 131   | 1.08 | 1.10 | 1.14 | 1.17 | 1.03 | 1.10 | 0.97 | 0.98 |  |  |      |      |      |      | 560  | 62.6  | 6.54 |
| Q12794 | Hyaluronidase-1 OS=Homo sapiens GN=HYAL1 PE=1 SV=2 - [HYAL1_HUMAN]                                  | 17.93 | 1 | 5  | 5  | 18    | 1.12 | 1.24 | 1.07 | 1.19 | 0.93 | 0.87 | 0.88 | 0.84 |  |  |      |      |      |      | 435  | 48.3  | 6.77 |
| Q4G0P3 | Hydrocephalus-inducing protein homolog OS=Homo sapiens GN=HYDIN PE=1 SV=3 - [HYDIN_HUMAN]           | 2.36  | 1 | 8  | 8  | 14    | 0.73 | 0.74 | 0.72 | 0.87 | 1.19 | 1.23 | 1.02 | 1.05 |  |  |      |      |      |      | 5121 | 575.5 | 6.06 |
| Q9UJM8 | Hydroxyacid oxidase 1 OS=Homo sapiens GN=HAO1 PE=1 SV=1 - [HAOX1_HUMAN]                             | 3.78  | 1 | 1  | 1  | 5     | 0.90 | 1.02 | 1.08 | 1.34 |      |      |      |      |  |  |      |      |      |      | 370  | 40.9  | 8.09 |
| Q9NYQ3 | Hydroxyacid oxidase 2 OS=Homo sapiens GN=HAO2 PE=2 SV=1 - [HAOX2_HUMAN]                             | 11.68 | 1 | 1  | 1  | 2     | 1.03 | 0.91 | 0.35 | 0.31 |      |      |      |      |  |  |      |      |      |      | 351  | 38.8  | 7.64 |
| Q01581 | Hydroxymethylglutaryl-CoA synthase, cytoplasmic OS=Homo sapiens GN=HMGCS1 PE=1 SV=2 - [HMCS1_HUMAN] | 4.81  | 1 | 2  | 2  | 2     | 1.17 | 1.15 | 1.01 | 1.00 | 1.15 | 1.30 | 1.05 | 1.18 |  |  |      |      |      |      | 520  | 57.3  | 5.41 |
| Q14526 | Hypermethylated in cancer 1 protein OS=Homo sapiens GN=HIC1 PE=1 SV=5 - [HIC1_HUMAN]                | 1.09  | 1 | 1  | 1  | 1     |      |      |      |      | 0.53 | 0.34 | 0.45 | 0.29 |  |  |      |      |      |      | 733  | 76.5  | 6.83 |
| P00492 | Hypoxanthine-guanine phosphoribosyltransferase OS=Homo sapiens GN=HPRT1 PE=1 SV=2 - [HPRT_HUMAN]    | 5.96  | 1 | 1  | 1  | 1     | 0.97 | 1.04 | 0.99 | 1.08 |      |      |      |      |  |  |      |      |      |      | 218  | 24.6  | 6.68 |
| Q9Y4L1 | Hypoxia up-regulated protein 1 OS=Homo sapiens GN=HYOU1 PE=1 SV=1 - [HYOU1_HUMAN]                   | 14.61 | 1 | 10 | 11 | 33    | 0.98 | 1.00 | 0.96 | 0.92 | 1.06 | 1.11 | 1.03 | 1.04 |  |  |      |      |      |      | 999  | 111.3 | 5.22 |
| Q16665 | Hypoxia-inducible factor 1-alpha OS=Homo sapiens GN=HIF1A PE=1 SV=1 - [HIF1A_HUMAN]                 | 2.91  | 1 | 1  | 1  | 1     |      |      |      |      | 1.54 | 1.83 | 1.31 | 1.55 |  |  |      |      |      |      | 826  | 92.6  | 5.33 |
| Q9Y2N7 | Hypoxia-inducible factor 3-alpha OS=Homo sapiens GN=HIF3A PE=1 SV=2 - [HIF3A_HUMAN]                 | 3.29  | 1 | 1  | 1  | 1     | 0.77 | 0.84 | 0.90 | 0.98 |      |      |      |      |  |  |      |      |      |      | 669  | 72.4  | 6.02 |
| O75144 | ICOS ligand OS=Homo sapiens GN=ICOSLG PE=1 SV=2 - [ICOSL_HUMAN]                                     | 8.61  | 2 | 3  | 3  | 21    | 1.14 | 1.14 | 1.15 | 1.10 | 0.80 | 0.83 | 0.78 | 0.82 |  |  |      |      |      |      | 302  | 33.3  | 5.31 |
| P01876 | Ig alpha-1 chain C region OS=Homo sapiens GN=IGHA1 PE=1 SV=2 - [IGHA1_HUMAN]                        | 66.01 | 1 | 8  | 26 | 6129  | 0.97 | 0.98 | 0.97 | 0.99 | 0.90 | 0.98 | 0.86 | 0.93 |  |  |      |      |      |      | 353  | 37.6  | 6.51 |
| P01877 | Ig alpha-2 chain C region OS=Homo sapiens GN=IGHA2 PE=1 SV=3 - [IGHA2_HUMAN]                        | 66.76 | 1 | 5  | 23 | 4674  | 1.01 | 1.01 | 0.97 | 0.97 | 0.83 | 0.82 | 0.81 | 0.80 |  |  |      |      |      |      | 340  | 36.5  | 6.10 |
| P01880 | Ig delta chain C region OS=Homo sapiens GN=IGHD PE=1 SV=2 - [IGHD_HUMAN]                            | 49.74 | 1 | 15 | 15 | 115   | 0.92 | 0.91 | 0.92 | 0.94 | 0.91 | 1.04 | 0.83 | 0.96 |  |  |      |      |      |      | 384  | 42.2  | 7.93 |
| P80422 | Ig gamma lambda chain V-II region DOT OS=Homo sapiens PE=1 SV=1 - [LV212_HUMAN]                     | 14.41 | 1 | 1  | 1  | 4     | 1.21 | 1.28 | 1.15 | 1.22 | 1.24 | 1.62 | 1.20 | 1.58 |  |  |      |      |      |      | 111  | 11.8  | 4.78 |
| P01857 | Ig gamma-1 chain C region OS=Homo sapiens GN=IGHG1 PE=1 SV=1 - [IGHG1_HUMAN]                        | 73.64 | 1 | 15 | 28 | 13046 | 1.11 | 1.11 | 1.12 | 1.13 | 1.04 | 1.13 | 1.05 | 1.14 |  |  |      |      |      |      | 330  | 36.1  | 8.19 |
| P01859 | Ig gamma-2 chain C region OS=Homo sapiens GN=IGHG2 PE=1 SV=2 - [IGHG2_HUMAN]                        | 73.01 | 1 | 11 | 23 | 9123  | 0.85 | 0.90 | 0.85 | 0.89 | 0.98 | 0.92 | 0.94 | 0.93 |  |  |      |      |      |      | 326  | 35.9  | 7.59 |
| P01860 | Ig gamma-3 chain C region OS=Homo sapiens GN=IGHG3 PE=1 SV=2 - [IGHG3_HUMAN]                        | 63.93 | 1 | 13 | 28 | 10503 | 0.90 | 0.87 | 0.92 | 0.89 | 0.98 | 1.04 | 0.98 | 0.98 |  |  |      |      |      |      | 377  | 41.3  | 7.90 |

|        |                                                                                    |       |   |    |    |      |      |      |      |      |      |      |      |      |     |      |      |
|--------|------------------------------------------------------------------------------------|-------|---|----|----|------|------|------|------|------|------|------|------|------|-----|------|------|
| P01861 | Ig gamma-4 chain C region OS=Homo sapiens GN=IGHG4 PE=1 SV=1 - [IGHG4_HUMAN]       | 70.64 | 1 | 8  | 17 | 7010 | 0.87 | 0.88 | 0.88 | 0.89 | 0.80 | 0.89 | 0.78 | 0.88 | 327 | 35.9 | 7.36 |
| P01742 | Ig heavy chain V-I region EU OS=Homo sapiens PE=1 SV=1 - [HV101_HUMAN]             | 16.24 | 3 | 2  | 2  | 559  | 2.06 | 1.55 | 1.25 | 1.04 | 1.34 | 1.28 | 1.22 | 1.22 | 117 | 12.5 | 6.57 |
| P01743 | Ig heavy chain V-I region HG3 OS=Homo sapiens PE=4 SV=1 - [HV102_HUMAN]            | 18.80 | 2 | 1  | 2  | 13   |      |      |      |      | 1.46 | 1.52 | 1.42 | 1.48 | 117 | 12.9 | 8.92 |
| P01744 | Ig heavy chain V-I region ND (Fragments) OS=Homo sapiens PE=1 SV=2 - [HV104_HUMAN] | 4.76  | 1 | 1  | 1  | 1    | 0.89 | 0.94 | 0.89 | 0.94 |      |      |      |      | 147 | 16.5 | 7.39 |
| P23083 | Ig heavy chain V-I region V35 OS=Homo sapiens PE=1 SV=1 - [HV103_HUMAN]            | 38.46 | 2 | 3  | 4  | 105  | 1.01 | 0.94 | 0.97 | 0.88 | 0.94 | 0.99 | 0.94 | 0.96 | 117 | 13.0 | 9.55 |
| P01760 | Ig heavy chain V-I region WOL OS=Homo sapiens PE=1 SV=1 - [HV105_HUMAN]            | 22.58 | 1 | 2  | 3  | 41   | 1.18 | 1.36 | 1.36 | 1.41 | 0.99 | 1.06 | 0.95 | 1.10 | 124 | 13.7 | 8.41 |
| P06331 | Ig heavy chain V-II region ARH-77 OS=Homo sapiens PE=4 SV=1 - [HV209_HUMAN]        | 17.12 | 2 | 2  | 2  | 38   | 0.85 | 0.95 | 0.83 | 0.93 | 0.98 | 1.09 | 0.92 | 1.00 | 146 | 16.2 | 8.28 |
| P01815 | Ig heavy chain V-II region COR OS=Homo sapiens PE=1 SV=1 - [HV202_HUMAN]           | 15.83 | 2 | 1  | 3  | 15   | 0.92 | 1.09 | 0.77 | 0.92 | 0.91 | 0.80 | 0.84 | 0.73 | 120 | 13.2 | 6.57 |
| P01818 | Ig heavy chain V-II region HE OS=Homo sapiens PE=1 SV=1 - [HV205_HUMAN]            | 5.79  | 1 | 1  | 1  | 1    |      |      |      |      | 0.96 | 1.07 | 0.94 | 1.05 | 121 | 13.5 | 8.50 |
| P04438 | Ig heavy chain V-II region SESS OS=Homo sapiens PE=2 SV=1 - [HV208_HUMAN]          | 19.73 | 3 | 2  | 4  | 58   | 0.81 | 0.77 | 0.80 | 0.82 | 0.84 | 0.95 | 0.78 | 0.89 | 147 | 16.3 | 7.09 |
| P01824 | Ig heavy chain V-II region WAH OS=Homo sapiens PE=1 SV=1 - [HV206_HUMAN]           | 17.05 | 2 | 2  | 3  | 26   | 1.02 | 1.11 | 0.96 | 1.01 | 0.98 | 1.05 | 0.96 | 1.02 | 129 | 14.1 | 8.46 |
| P01766 | Ig heavy chain V-III region BRO OS=Homo sapiens PE=1 SV=1 - [HV305_HUMAN]          | 41.67 | 1 | 2  | 4  | 636  | 0.99 | 0.96 | 1.03 | 1.00 | 0.96 | 1.08 | 0.95 | 1.04 | 120 | 13.2 | 6.57 |
| P01773 | Ig heavy chain V-III region BUR OS=Homo sapiens PE=1 SV=1 - [HV312_HUMAN]          | 36.13 | 1 | 2  | 3  | 15   | 1.14 | 1.42 | 1.07 | 1.34 | 1.15 | 1.23 | 1.18 | 1.24 | 119 | 13.0 | 9.60 |
| P01767 | Ig heavy chain V-III region BUT OS=Homo sapiens PE=1 SV=1 - [HV306_HUMAN]          | 30.43 | 1 | 1  | 5  | 166  | 0.89 | 0.85 | 0.89 | 0.91 | 1.01 | 1.08 | 1.00 | 1.05 | 115 | 12.4 | 9.25 |
| P01781 | Ig heavy chain V-III region GAL OS=Homo sapiens PE=1 SV=1 - [HV320_HUMAN]          | 54.31 | 2 | 7  | 8  | 208  | 0.90 | 1.01 | 0.86 | 0.98 | 0.97 | 1.06 | 1.03 | 1.06 | 116 | 12.7 | 8.48 |
| P80419 | Ig heavy chain V-III region GAR OS=Homo sapiens PE=1 SV=1 - [HV322_HUMAN]          | 20.34 | 1 | 1  | 2  | 7    | 0.79 | 0.77 | 0.91 | 0.89 | 0.58 | 0.62 | 0.53 | 0.56 | 118 | 13.1 | 4.81 |
| P01780 | Ig heavy chain V-III region JON OS=Homo sapiens PE=1 SV=1 - [HV319_HUMAN]          | 43.48 | 1 | 2  | 4  | 29   | 0.97 | 1.02 | 1.11 | 1.09 | 0.84 | 1.08 | 0.86 | 1.02 | 115 | 12.6 | 9.29 |
| P01772 | Ig heavy chain V-III region KOL OS=Homo sapiens PE=1 SV=1 - [HV311_HUMAN]          | 26.19 | 2 | 2  | 4  | 45   | 0.98 | 0.93 | 1.06 | 0.96 | 1.00 | 1.04 | 1.03 | 1.03 | 126 | 13.7 | 5.87 |
| P01775 | Ig heavy chain V-III region LAY OS=Homo sapiens PE=1 SV=1 - [HV314_HUMAN]          | 27.73 | 1 | 1  | 3  | 36   | 0.84 | 0.90 | 0.81 | 0.84 | 0.72 | 0.79 | 0.72 | 0.77 | 119 | 12.8 | 8.48 |
| P01770 | Ig heavy chain V-III region NIE OS=Homo sapiens PE=1 SV=1 - [HV309_HUMAN]          | 41.18 | 1 | 2  | 5  | 32   | 1.05 | 1.11 | 1.01 | 1.10 | 0.97 | 0.84 | 1.02 | 0.88 | 119 | 13.2 | 9.72 |
| P01765 | Ig heavy chain V-III region TIL OS=Homo sapiens PE=1 SV=1 - [HV304_HUMAN]          | 54.78 | 1 | 1  | 5  | 576  | 0.90 | 0.97 | 0.96 | 0.99 | 1.01 | 0.87 | 1.03 | 0.91 | 115 | 12.3 | 9.13 |
| P01762 | Ig heavy chain V-III region TRO OS=Homo sapiens PE=1 SV=1 - [HV301_HUMAN]          | 32.79 | 1 | 4  | 4  | 43   | 1.18 | 1.20 | 1.26 | 1.19 | 1.04 | 1.06 | 1.02 | 1.13 | 122 | 13.5 | 9.72 |
| P01764 | Ig heavy chain V-III region VH26 OS=Homo sapiens PE=1 SV=1 - [HV303_HUMAN]         | 30.77 | 2 | 1  | 4  | 67   | 0.91 | 1.05 | 0.86 | 1.02 | 1.01 | 1.00 | 1.00 | 0.98 | 117 | 12.6 | 8.28 |
| P01776 | Ig heavy chain V-III region WAS OS=Homo sapiens PE=1 SV=1 - [HV315_HUMAN]          | 68.38 | 2 | 3  | 7  | 493  | 0.86 | 1.04 | 0.92 | 1.14 | 1.06 | 1.00 | 1.11 | 1.06 | 117 | 13.1 | 7.99 |
| P01763 | Ig heavy chain V-III region WEA OS=Homo sapiens PE=1 SV=1 - [HV302_HUMAN]          | 40.35 | 1 | 2  | 4  | 118  | 1.00 | 0.98 | 1.02 | 1.00 | 0.97 | 1.04 | 0.99 | 1.12 | 114 | 12.2 | 8.50 |
| P01778 | Ig heavy chain V-III region ZAP OS=Homo sapiens PE=1 SV=1 - [HV317_HUMAN]          | 44.83 | 1 | 2  | 4  | 33   | 1.38 | 1.42 | 1.28 | 1.41 | 1.03 | 1.14 | 0.94 | 1.02 | 116 | 12.6 | 8.51 |
| P01834 | Ig kappa chain C region OS=Homo sapiens GN=IGKC PE=1 SV=1 - [IGKC_HUMAN]           | 92.45 | 1 | 12 | 12 | 9500 | 0.93 | 0.96 | 0.93 | 0.95 | 0.94 | 0.99 | 0.94 | 0.97 | 106 | 11.6 | 5.87 |

|        |                                                                                                 |       |   |   |   |     |      |      |      |      |      |      |      |      |     |      |      |
|--------|-------------------------------------------------------------------------------------------------|-------|---|---|---|-----|------|------|------|------|------|------|------|------|-----|------|------|
| P01593 | Ig kappa chain V-I region AG OS=Homo sapiens PE=1 SV=1 - [KV101_HUMAN]                          | 42.59 | 2 | 2 | 5 | 877 | 1.84 | 1.54 | 1.54 | 1.30 | 1.39 | 1.53 | 1.25 | 1.37 | 108 | 12.0 | 5.99 |
| P01594 | Ig kappa chain V-I region AU OS=Homo sapiens PE=1 SV=1 - [KV102_HUMAN]                          | 31.48 | 2 | 1 | 2 | 843 |      |      |      |      | 2.27 | 2.26 | 2.35 | 2.34 | 108 | 11.9 | 5.33 |
| P04430 | Ig kappa chain V-I region BAN OS=Homo sapiens PE=1 SV=1 [KV122_HUMAN]                           | 22.22 | 3 | 1 | 2 | 241 | 0.78 | 0.74 | 0.85 | 0.76 | 0.92 | 0.93 | 0.96 | 0.89 | 108 | 11.8 | 8.44 |
| P01596 | Ig kappa chain V-I region CAR OS=Homo sapiens PE=1 SV=1 - [KV104_HUMAN]                         | 49.53 | 1 | 3 | 4 | 360 | 1.07 | 1.14 | 1.02 | 1.08 | 1.10 | 1.14 | 1.10 | 1.09 | 107 | 11.7 | 9.41 |
| P01597 | Ig kappa chain V-I region DEE OS=Homo sapiens PE=1 SV=1 [KV105_HUMAN]                           | 32.41 | 3 | 3 | 5 | 215 | 1.06 | 1.14 | 1.03 | 1.08 | 0.95 | 1.04 | 0.99 | 1.11 | 108 | 11.7 | 9.36 |
| P01598 | Ig kappa chain V-I region EU OS=Homo sapiens PE=1 SV=1 - [KV106_HUMAN]                          | 38.89 | 3 | 3 | 5 | 531 | 1.09 | 1.06 | 1.06 | 1.07 | 1.12 | 1.22 | 1.08 | 1.18 | 108 | 11.8 | 8.44 |
| P01599 | Ig kappa chain V-I region Gal OS=Homo sapiens PE=1 SV=1 - [KV107_HUMAN]                         | 33.33 | 2 | 3 | 4 | 852 | 0.87 | 0.92 | 0.83 | 0.89 | 1.35 | 1.32 | 0.95 | 0.93 | 108 | 11.8 | 8.88 |
| P01600 | Ig kappa chain V-I region Hau OS=Homo sapiens PE=1 SV=1 - [KV108_HUMAN]                         | 38.89 | 5 | 1 | 4 | 962 | 1.30 | 1.15 | 1.58 | 1.41 | 1.40 | 1.79 | 1.38 | 1.76 | 108 | 11.7 | 8.48 |
| P01601 | Ig kappa chain V-I region HK101 (Fragment) OS=Homo sapiens PE=4 SV=1 - [KV109_HUMAN]            | 18.80 | 3 | 1 | 2 | 117 | 0.96 | 1.05 | 0.92 | 1.01 | 1.09 | 1.03 | 1.09 | 1.02 | 117 | 12.8 | 8.16 |
| P01602 | Ig kappa chain V-I region HK102 (Fragment) OS=Homo sapiens GN=IGKV1-5 PE=4 SV=1 - [KV110_HUMAN] | 34.19 | 3 | 2 | 3 | 118 | 1.33 | 1.46 | 1.25 | 1.39 | 1.85 | 1.58 | 1.59 | 1.37 | 117 | 12.8 | 6.51 |
| P01603 | Ig kappa chain V-I region Ka OS=Homo sapiens PE=1 SV=1 - [KV111_HUMAN]                          | 37.96 | 1 | 2 | 3 | 29  | 3.35 | 3.64 | 3.67 | 3.95 | 0.87 | 0.88 | 0.76 | 0.80 | 108 | 11.9 | 8.85 |
| P01604 | Ig kappa chain V-I region Kue OS=Homo sapiens PE=1 SV=1 - [KV112_HUMAN]                         | 32.41 | 3 | 2 | 3 | 118 | 0.75 | 0.73 | 0.76 | 0.75 | 0.86 | 0.86 | 0.80 | 0.79 | 108 | 12.1 | 8.81 |
| P01605 | Ig kappa chain V-I region Lay OS=Homo sapiens PE=1 SV=1 - [KV113_HUMAN]                         | 31.48 | 1 | 2 | 3 | 151 | 1.12 | 1.17 | 1.17 | 1.19 | 1.36 | 1.44 | 1.39 | 1.45 | 108 | 11.8 | 7.96 |
| P01612 | Ig kappa chain V-I region Mev OS=Homo sapiens PE=1 SV=1 - [KV120_HUMAN]                         | 36.70 | 1 | 3 | 3 | 290 | 0.91 | 0.87 | 0.92 | 0.88 | 0.90 | 0.96 | 0.87 | 0.95 | 109 | 11.9 | 6.57 |
| P01613 | Ig kappa chain V-I region Ni OS=Homo sapiens PE=1 SV=1 - [KV121_HUMAN]                          | 30.36 | 1 | 1 | 2 | 177 | 0.81 | 0.85 | 0.73 | 0.79 | 0.88 | 0.90 | 0.86 | 0.83 | 112 | 12.2 | 5.36 |
| P01606 | Ig kappa chain V-I region OU OS=Homo sapiens PE=1 SV=1 - [KV114_HUMAN]                          | 22.22 | 3 | 1 | 5 | 186 | 0.81 | 0.58 | 0.88 | 0.63 | 1.02 | 1.07 | 0.92 | 0.97 | 108 | 11.8 | 9.91 |
| P01608 | Ig kappa chain V-I region Roy OS=Homo sapiens PE=1 SV=1 - [KV116_HUMAN]                         | 24.07 | 2 | 1 | 2 | 845 |      |      |      |      | 1.04 | 0.76 | 0.89 | 0.66 | 108 | 11.8 | 5.36 |
| P01609 | Ig kappa chain V-I region Scw OS=Homo sapiens PE=1 SV=1 - [KV117_HUMAN]                         | 27.78 | 2 | 1 | 2 | 879 | 0.83 | 0.79 | 0.85 | 0.83 | 0.79 | 0.76 | 0.87 | 0.81 | 108 | 11.8 | 6.00 |
| P01610 | Ig kappa chain V-I region WEA OS=Homo sapiens PE=1 SV=1 - [KV118_HUMAN]                         | 55.56 | 5 | 3 | 6 | 971 | 0.86 | 0.94 | 0.82 | 0.91 | 1.02 | 0.92 | 1.07 | 0.97 | 108 | 11.8 | 8.91 |
| P01611 | Ig kappa chain V-I region Wes OS=Homo sapiens PE=1 SV=1 - [KV119_HUMAN]                         | 37.04 | 3 | 2 | 3 | 311 | 1.04 | 1.00 | 1.06 | 0.96 | 1.02 | 1.08 | 0.99 | 1.06 | 108 | 11.6 | 7.28 |
| P01614 | Ig kappa chain V-II region Cum OS=Homo sapiens PE=1 SV=1 - [KV201_HUMAN]                        | 41.74 | 2 | 1 | 5 | 175 | 1.36 | 1.11 | 1.38 | 1.12 | 0.99 | 1.25 | 0.96 | 1.19 | 115 | 12.7 | 5.40 |
| P01615 | Ig kappa chain V-II region FR OS=Homo sapiens PE=1 SV=1 - [KV202_HUMAN]                         | 24.78 | 1 | 2 | 3 | 19  | 0.87 | 0.91 | 0.91 | 0.96 | 0.77 | 0.89 | 0.85 | 1.17 | 113 | 12.7 | 7.94 |
| P01616 | Ig kappa chain V-II region MIL OS=Homo sapiens PE=1 SV=1 - [KV203_HUMAN]                        | 27.68 | 1 | 1 | 3 | 53  | 1.21 | 0.95 | 1.21 | 1.10 | 0.96 | 1.02 | 0.86 | 1.00 | 112 | 12.0 | 9.29 |
| P06310 | Ig kappa chain V-II region RPM1 6410 OS=Homo sapiens PE=4 SV=1 - [KV206_HUMAN]                  | 20.30 | 1 | 1 | 4 | 142 | 1.29 | 0.98 | 1.38 | 1.06 |      |      |      |      | 133 | 14.7 | 9.25 |
| P01617 | Ig kappa chain V-II region TEW OS=Homo sapiens PE=1 SV=1 - [KV204_HUMAN]                        | 41.59 | 2 | 1 | 5 | 396 | 1.09 | 0.95 | 1.09 | 0.97 | 0.96 | 1.04 | 0.92 | 1.03 | 113 | 12.3 | 6.00 |
| P01619 | Ig kappa chain V-III region B6 OS=Homo sapiens PE=1 SV=1 - [KV301_HUMAN]                        | 26.85 | 1 | 4 | 5 | 87  | 0.91 | 0.96 | 0.87 | 0.92 | 0.90 | 0.85 | 0.98 | 0.90 | 108 | 11.6 | 9.25 |
| P04207 | Ig kappa chain V-III region CLL OS=Homo sapiens PE=1 SV=2 - [KV308_HUMAN]                       | 45.74 | 1 | 2 | 5 | 114 | 0.91 | 0.94 | 0.86 | 0.90 | 0.92 | 0.86 | 0.98 | 0.93 | 129 | 14.3 | 8.51 |

|        |                                                                                      |       |   |   |   |      |      |      |      |      |      |      |      |      |     |      |      |
|--------|--------------------------------------------------------------------------------------|-------|---|---|---|------|------|------|------|------|------|------|------|------|-----|------|------|
| P18135 | Ig kappa chain V-III region HAH OS=Homo sapiens PE=2 SV=1 - [KV312_HUMAN]            | 55.81 | 2 | 2 | 9 | 546  | 1.34 | 1.08 | 1.08 | 0.86 | 1.17 | 1.27 | 1.03 | 1.16 | 129 | 14.1 | 7.96 |
| P06311 | Ig kappa chain V-III region IARC/BL41 OS=Homo sapiens PE=1 SV=1 - [KV311_HUMAN]      | 41.41 | 1 | 5 | 5 | 52   | 1.05 | 1.05 | 1.01 | 1.01 | 1.29 | 1.11 | 1.24 | 1.06 | 128 | 14.1 | 6.61 |
| P01621 | Ig kappa chain V-III region NG9 (Fragment) OS=Homo sapiens PE=1 SV=1 - [KV303_HUMAN] | 60.00 | 1 | 2 | 5 | 88   | 0.92 | 0.90 | 0.71 | 0.75 | 0.82 | 0.79 | 0.93 | 0.91 | 100 | 10.7 | 6.52 |
| P01624 | Ig kappa chain V-III region POM OS=Homo sapiens PE=1 SV=1 - [KV306_HUMAN]            | 36.70 | 1 | 2 | 5 | 78   | 1.01 | 1.05 | 0.96 | 0.97 | 1.04 | 1.14 | 0.79 | 1.07 | 109 | 11.9 | 8.94 |
| P01620 | Ig kappa chain V-III region SIE OS=Homo sapiens PE=1 SV=1 - [KV302_HUMAN]            | 71.56 | 1 | 1 | 8 | 1308 | 1.02 | 1.09 | 1.08 | 1.17 | 1.15 | 1.10 | 1.10 | 1.05 | 109 | 11.8 | 8.48 |
| P01622 | Ig kappa chain V-III region TI OS=Homo sapiens PE=1 SV=1 - [KV304_HUMAN]             | 71.56 | 1 | 2 | 8 | 1301 | 0.62 | 0.61 | 0.64 | 0.62 | 1.07 | 1.22 | 1.07 | 1.22 | 109 | 11.8 | 8.50 |
| P04433 | Ig kappa chain V-III region VG (Fragment) OS=Homo sapiens PE=1 SV=1 - [KV309_HUMAN]  | 63.48 | 1 | 3 | 5 | 69   | 1.00 | 0.98 | 0.96 | 1.00 | 1.04 | 1.00 | 1.04 | 1.00 | 115 | 12.6 | 4.96 |
| P04434 | Ig kappa chain V-III region VH (Fragment) OS=Homo sapiens PE=4 SV=1 - [KV310_HUMAN]  | 28.45 | 1 | 2 | 3 | 73   | 0.94 | 0.86 | 0.96 | 0.90 | 0.93 | 1.02 | 0.86 | 0.94 | 116 | 12.7 | 5.94 |
| P01625 | Ig kappa chain V-IV region Len OS=Homo sapiens PE=1 SV=2 - [KV402_HUMAN]             | 48.25 | 2 | 4 | 5 | 557  | 0.97 | 0.92 | 0.98 | 0.94 | 1.01 | 1.07 | 0.94 | 1.02 | 114 | 12.6 | 7.93 |
| P83593 | Ig kappa chain V-IV region STH (Fragment) OS=Homo sapiens PE=1 SV=1 - [KV405_HUMAN]  | 42.20 | 1 | 3 | 4 | 90   | 0.97 | 1.13 | 0.94 | 1.10 | 1.18 | 1.17 | 1.12 | 1.14 | 109 | 12.1 | 7.94 |
| P04211 | Ig lambda chain V region 4A OS=Homo sapiens PE=4 SV=1 - [LV001_HUMAN]                | 21.37 | 1 | 3 | 3 | 60   | 1.09 | 1.07 | 1.03 | 1.01 | 1.02 | 1.10 | 1.02 | 1.09 | 117 | 12.4 | 7.03 |
| P06888 | Ig lambda chain V-I region EPS OS=Homo sapiens PE=1 SV=1 - [LV109_HUMAN]             | 19.27 | 1 | 1 | 3 | 61   | 1.15 | 1.26 | 0.96 | 1.06 | 1.18 |      | 0.68 |      | 109 | 11.4 | 9.29 |
| P01700 | Ig lambda chain V-I region HA OS=Homo sapiens PE=1 SV=1 - [LV102_HUMAN]              | 23.21 | 3 | 1 | 4 | 376  | 1.03 | 0.74 | 0.97 | 0.70 | 1.11 | 1.70 | 1.04 | 1.34 | 112 | 11.9 | 8.91 |
| P06887 | Ig lambda chain V-I region MEM OS=Homo sapiens PE=1 SV=1 - [LV108_HUMAN]             | 14.29 | 1 | 1 | 1 | 3    |      |      |      |      | 0.70 | 0.77 | 0.78 | 0.86 | 112 | 11.8 | 5.25 |
| P01701 | Ig lambda chain V-I region NEW OS=Homo sapiens PE=1 SV=1 - [LV103_HUMAN]             | 18.92 | 1 | 1 | 2 | 114  | 0.79 | 0.85 | 0.79 | 0.83 | 0.86 | 0.83 | 0.95 | 0.92 | 111 | 11.4 | 8.00 |
| P01703 | Ig lambda chain V-I region NEWM OS=Homo sapiens PE=1 SV=1 - [LV105_HUMAN]            | 36.89 | 1 | 4 | 4 | 37   | 1.04 | 1.06 | 1.00 | 0.97 | 1.13 | 1.02 | 1.11 | 1.02 | 103 | 10.9 | 9.29 |
| P01702 | Ig lambda chain V-I region NIG-64 OS=Homo sapiens PE=1 SV=1 - [LV104_HUMAN]          | 18.92 | 2 | 2 | 4 | 73   | 1.12 | 1.02 | 1.22 | 1.15 | 1.35 | 1.31 | 1.10 | 1.07 | 111 | 11.4 | 4.89 |
| P01699 | Ig lambda chain V-I region VOR OS=Homo sapiens PE=1 SV=1 - [LV101_HUMAN]             | 29.73 | 1 | 2 | 3 | 17   | 1.20 | 1.13 | 1.11 | 1.05 | 0.87 | 0.93 | 0.85 | 0.90 | 111 | 11.5 | 5.29 |
| P04208 | Ig lambda chain V-I region WAH OS=Homo sapiens PE=1 SV=1 - [LV106_HUMAN]             | 42.20 | 1 | 1 | 4 | 348  | 1.00 | 0.93 | 0.97 | 0.95 | 0.89 | 0.91 | 1.03 | 1.05 | 109 | 11.7 | 6.54 |
| P01710 | Ig lambda chain V-II region BO OS=Homo sapiens PE=1 SV=1 - [LV207_HUMAN]             | 26.13 | 1 | 2 | 2 | 20   | 1.28 | 1.18 | 1.21 | 1.11 | 1.49 | 1.56 | 1.64 | 1.57 | 111 | 11.8 | 6.00 |
| P01708 | Ig lambda chain V-II region BUR OS=Homo sapiens PE=1 SV=1 - [LV205_HUMAN]            | 10.09 | 1 | 1 | 1 | 19   | 1.14 | 1.22 | 1.10 | 1.17 | 1.18 | 1.21 | 1.17 | 1.19 | 109 | 11.5 | 7.87 |
| P01705 | Ig lambda chain V-II region NEI OS=Homo sapiens PE=1 SV=1 - [LV202_HUMAN]            | 7.21  | 1 | 1 | 1 | 31   | 1.07 | 1.08 | 1.05 | 1.02 | 1.18 | 1.23 | 1.26 | 1.31 | 111 | 11.6 | 8.63 |
| P04209 | Ig lambda chain V-II region NIG-84 OS=Homo sapiens PE=1 SV=1 - [LV211_HUMAN]         | 21.43 | 1 | 2 | 2 | 21   | 0.99 | 0.98 | 0.97 | 0.99 | 1.03 | 1.00 | 1.05 | 1.03 | 112 | 11.6 | 7.12 |
| P01707 | Ig lambda chain V-II region TRO OS=Homo sapiens PE=1 SV=1 - [LV204_HUMAN]            | 26.13 | 1 | 2 | 3 | 69   | 0.95 | 0.95 | 0.91 | 0.90 | 0.95 | 0.98 | 0.91 | 0.89 | 111 | 11.6 | 8.29 |
| P01711 | Ig lambda chain V-II region VIL OS=Homo sapiens PE=1 SV=1 - [LV208_HUMAN]            | 6.31  | 1 | 1 | 1 | 1    | 0.96 | 1.00 | 0.99 | 1.04 |      |      |      |      | 111 | 11.4 | 6.51 |
| P80748 | Ig lambda chain V-III region LOI OS=Homo sapiens PE=1 SV=1 - [LV302_HUMAN]           | 45.95 | 1 | 4 | 4 | 778  | 0.98 | 1.00 | 0.95 | 0.95 | 0.96 | 0.92 | 1.06 | 1.02 | 111 | 11.9 | 5.08 |
| P01714 | Ig lambda chain V-III region SH OS=Homo sapiens PE=1 SV=1 - [LV301_HUMAN]            | 42.59 | 1 | 4 | 4 | 100  | 0.98 | 0.94 | 0.93 | 0.89 | 0.97 | 1.01 | 0.95 | 0.99 | 108 | 11.4 | 6.52 |

|        |                                                                                                                             |       |   |    |    |      |      |      |      |      |      |      |      |      |      |       |       |
|--------|-----------------------------------------------------------------------------------------------------------------------------|-------|---|----|----|------|------|------|------|------|------|------|------|------|------|-------|-------|
| P01715 | Ig lambda chain V-IV region Bau OS=Homo sapiens PE=1 SV=1 - [LV401_HUMAN]                                                   | 7.55  | 1 | 1  | 1  | 8    | 1.23 | 0.96 | 1.28 | 1.02 | 0.86 | 0.76 | 1.08 | 0.96 | 106  | 11.3  | 5.24  |
| P01717 | Ig lambda chain V-IV region Hil OS=Homo sapiens PE=1 SV=1 - [LV403_HUMAN]                                                   | 17.76 | 1 | 1  | 1  | 90   | 1.02 | 1.01 | 1.02 | 1.05 | 1.12 | 1.08 | 1.12 | 1.08 | 107  | 11.5  | 6.51  |
| P06889 | Ig lambda chain V-IV region MOL OS=Homo sapiens PE=1 SV=1 - [LV405_HUMAN]                                                   | 23.58 | 1 | 1  | 1  | 14   | 1.05 | 1.09 | 1.05 | 1.10 | 1.27 | 1.28 | 1.11 | 1.13 | 106  | 11.3  | 4.42  |
| P01716 | Ig lambda chain V-IV region X OS=Homo sapiens PE=1 SV=1 - [LV402_HUMAN]                                                     | 6.60  | 1 | 1  | 1  | 1    | 0.67 | 0.70 | 0.65 | 0.68 |      |      |      |      | 106  | 11.3  | 4.59  |
| P01719 | Ig lambda chain V-V region DEL OS=Homo sapiens PE=1 SV=1 - [LV501_HUMAN]                                                    | 59.26 | 1 | 3  | 3  | 202  | 1.11 | 1.17 | 1.09 | 1.15 | 1.13 | 1.03 | 1.20 | 1.11 | 108  | 11.3  | 5.36  |
| P01722 | Ig lambda chain V-VI region NIG-48 OS=Homo sapiens PE=1 SV=1 - [LV602_HUMAN]                                                | 21.43 | 1 | 2  | 2  | 7    | 1.06 | 1.17 | 0.98 | 1.09 | 1.11 | 1.10 | 1.61 | 1.58 | 112  | 12.1  | 6.51  |
| P06317 | Ig lambda chain V-VI region SUT OS=Homo sapiens PE=1 SV=1 - [LV603_HUMAN]                                                   | 36.94 | 2 | 4  | 4  | 33   | 0.77 | 0.72 | 0.74 | 0.70 | 0.92 | 0.85 | 0.99 | 0.89 | 111  | 12.2  | 5.12  |
| P06318 | Ig lambda chain V-VI region WLT OS=Homo sapiens PE=1 SV=1 - [LV604_HUMAN]                                                   | 18.02 | 2 | 1  | 1  | 29   | 1.02 | 1.08 | 1.01 | 1.06 | 1.23 | 1.30 | 1.04 | 1.12 | 111  | 12.0  | 4.78  |
| P0CG05 | Ig lambda-2 chain C regions OS=Homo sapiens GN=IGLC2 PE=1 SV=1 - [LAC2_HUMAN]                                               | 96.23 | 1 | 2  | 11 | 3396 | 1.11 | 1.05 | 1.12 | 1.06 | 1.22 | 1.28 | 1.08 | 1.16 | 106  | 11.3  | 7.24  |
| P0CG06 | Ig lambda-3 chain C regions OS=Homo sapiens GN=IGLC3 PE=1 SV=1 - [LAC3_HUMAN]                                               | 89.62 | 1 | 1  | 9  | 3117 | 0.82 | 0.99 | 0.88 | 1.07 | 1.16 | 1.23 | 1.25 | 1.32 | 106  | 11.2  | 7.24  |
| P0CF74 | Ig lambda-6 chain C region OS=Homo sapiens GN=IGLC6 PE=4 SV=1 - [LAC6_HUMAN]                                                | 72.64 | 1 | 1  | 6  | 2708 |      |      |      |      | 5.48 | 4.91 | 4.99 | 4.48 | 106  | 11.3  | 7.24  |
| A0M8Q6 | Ig lambda-7 chain C region OS=Homo sapiens GN=IGLC7 PE=1 SV=2 - [LAC7_HUMAN]                                                | 88.68 | 1 | 5  | 9  | 2178 | 1.34 | 1.32 | 1.31 | 1.31 | 1.59 | 1.74 | 1.36 | 1.58 | 106  | 11.3  | 8.28  |
| P01871 | Ig mu chain C region OS=Homo sapiens GN=IGHM PE=1 SV=3 - [IGHM_HUMAN]                                                       | 64.60 | 1 | 18 | 36 | 4279 | 1.24 | 1.30 | 1.27 | 1.34 | 1.12 | 1.11 | 1.02 | 1.07 | 452  | 49.3  | 6.77  |
| P04220 | Ig mu heavy chain disease protein OS=Homo sapiens PE=1 SV=1 - [MUCB_HUMAN]                                                  | 61.89 | 1 | 2  | 22 | 2217 | 0.88 | 0.83 | 0.89 | 0.92 |      |      |      |      | 391  | 43.0  | 5.24  |
| Q9Y6R7 | IgGfC-binding protein OS=Homo sapiens GN=FCGBP PE=1 SV=3 - [FCGBP_HUMAN]                                                    | 13.62 | 1 | 39 | 39 | 124  | 0.86 | 0.84 | 0.83 | 0.79 | 0.62 | 0.71 | 0.65 | 0.74 | 5405 | 571.6 | 5.34  |
| Q5T953 | Immediate early response gene 5-like protein OS=Homo sapiens GN=IER5L PE=2 SV=1 - [IER5L_HUMAN]                             | 2.23  | 1 | 1  | 1  | 1    | 1.37 | 1.32 | 1.17 | 1.13 |      |      |      |      | 404  | 42.1  | 6.93  |
| P01591 | Immunoglobulin J chain OS=Homo sapiens GN=IGJ PE=1 SV=4 - [IGJ_HUMAN]                                                       | 72.33 | 1 | 9  | 9  | 290  | 1.17 | 1.11 | 1.29 | 1.23 | 1.14 | 1.09 | 1.15 | 1.07 | 159  | 18.1  | 5.24  |
| P15814 | Immunoglobulin lambda-like polypeptide 1 OS=Homo sapiens GN=IGLL1 PE=1 SV=1 - [IGLL1_HUMAN]                                 | 20.19 | 1 | 2  | 3  | 42   | 0.99 | 0.96 | 1.01 | 0.99 | 0.72 | 0.89 | 0.72 | 0.94 | 213  | 22.9  | 10.07 |
| B9A064 | Immunoglobulin lambda-like polypeptide 5 OS=Homo sapiens GN=IGLL5 PE=2 SV=2 - [IGLL5_HUMAN]                                 | 51.40 | 2 | 5  | 12 | 2093 | 0.97 | 0.94 | 0.99 | 0.95 | 1.05 | 1.14 | 0.97 | 1.10 | 214  | 23.0  | 8.84  |
| O14498 | Immunoglobulin superfamily containing leucine-rich repeat protein OS=Homo sapiens GN=ISLR PE=1 SV=1 - [ISLR_HUMAN]          | 10.05 | 1 | 3  | 3  | 22   | 0.99 | 0.95 | 1.03 | 0.96 | 0.76 | 0.82 | 0.72 | 0.76 | 428  | 46.0  | 5.15  |
| Q6WRI0 | Immunoglobulin superfamily member 10 OS=Homo sapiens GN=IGSF10 PE=1 SV=1 - [IGSF10_HUMAN]                                   | 1.14  | 1 | 2  | 2  | 3    | 0.30 | 0.33 | 0.35 | 0.39 |      |      |      |      | 2623 | 290.7 | 9.13  |
| O75054 | Immunoglobulin superfamily member 3 OS=Homo sapiens GN=IGSF3 PE=1 SV=3 - [IGSF3_HUMAN]                                      | 1.76  | 1 | 1  | 1  | 2    | 0.67 | 0.55 | 0.67 | 0.56 |      |      |      |      | 1194 | 135.1 | 6.07  |
| Q9NSI5 | Immunoglobulin superfamily member 5 OS=Homo sapiens GN=IGSF5 PE=2 SV=2 - [IGSF5_HUMAN]                                      | 1.72  | 1 | 1  | 1  | 1    |      |      |      |      | 0.66 | 0.65 | 0.78 | 0.78 | 407  | 44.6  | 7.80  |
| Q86VF2 | Immunoglobulin-like and fibronectin type III domain-containing protein 1 OS=Homo sapiens GN=IGFN1 PE=1 SV=2 - [IGFN1_HUMAN] | 3.36  | 1 | 2  | 2  | 27   | 1.18 | 1.16 | 1.05 | 1.10 | 1.02 | 1.05 | 0.99 | 1.01 | 1251 | 137.7 | 7.56  |
| Q71H61 | Immunoglobulin-like domain-containing receptor 2 OS=Homo sapiens GN=ILDR2 PE=2 SV=1 - [ILDR2_HUMAN]                         | 1.88  | 1 | 2  | 2  | 3    |      |      |      |      | 0.68 | 0.81 | 0.93 | 0.83 | 639  | 71.2  | 8.12  |
| A9QM74 | Importin subunit alpha-8 OS=Homo sapiens GN=KPNA7 PE=1 SV=1 - [IMA8_HUMAN]                                                  | 2.13  | 2 | 1  | 1  | 1    |      |      |      |      | 0.77 | 0.80 | 0.79 | 0.81 | 516  | 56.9  | 6.04  |
| Q14974 | Importin subunit beta-1 OS=Homo sapiens GN=KPNA1 PE=1 SV=2 - [IMB1_HUMAN]                                                   | 1.03  | 1 | 1  | 1  | 1    | 0.56 | 0.66 | 0.66 | 0.78 |      |      |      |      | 876  | 97.1  | 4.78  |

|        |                                                                                                                       |       |   |   |   |    |      |      |      |       |      |      |       |      |      |       |      |
|--------|-----------------------------------------------------------------------------------------------------------------------|-------|---|---|---|----|------|------|------|-------|------|------|-------|------|------|-------|------|
| Q9UI26 | Importin-11 OS=Homo sapiens GN=IPO11 PE=1 SV=1 - [IPO11_HUMAN]                                                        | 1.44  | 1 | 1 | 1 | 1  | 0.91 | 0.36 | 0.90 | 0.36  |      | 975  | 112.5 | 5.25 |      |       |      |
| Q96P70 | Importin-9 OS=Homo sapiens GN=IPO9 PE=1 SV=3 - [IPO9_HUMAN]                                                           | 1.54  | 1 | 1 | 1 | 7  |      |      |      |       | 1.09 | 1.12 | 1.08  | 1.11 | 1041 | 115.9 | 4.81 |
| Q6UXS9 | Inactive caspase-12 OS=Homo sapiens GN=CASP12 PE=2 SV=1 - [CASPC_HUMAN]                                               | 3.81  | 1 | 1 | 1 | 1  |      |      |      |       | 0.60 | 0.96 | 0.57  | 0.90 | 341  | 38.9  | 6.02 |
| Q8N608 | Inactive dipeptidyl peptidase 10 OS=Homo sapiens GN=DPP10 PE=1 SV=2 - [DPP10_HUMAN]                                   | 1.51  | 1 | 1 | 1 | 1  | 0.88 | 0.76 | 1.00 | 0.86  |      |      |       |      | 796  | 90.8  | 6.57 |
| Q9UPR0 | Inactive phospholipase C-like protein 2 OS=Homo sapiens GN=PLCL2 PE=1 SV=2 - [PLCL2_HUMAN]                            | 3.37  | 1 | 2 | 2 | 2  |      |      |      |       | 4.53 | 4.92 | 0.82  | 0.92 | 1127 | 125.8 | 6.90 |
| Q8N7P1 | Inactive phospholipase D5 OS=Homo sapiens GN=PLD5 PE=2 SV=2 - [PLD5_HUMAN]                                            | 0.93  | 1 | 1 | 1 | 1  |      |      |      |       | 1.11 | 0.92 | 1.06  | 0.88 | 536  | 61.3  | 8.72 |
| Q6ZVT0 | Inactive polyglycolase TTL10 OS=Homo sapiens GN=TLL10 PE=1 SV=2 - [TLL10_HUMAN]                                       | 1.63  | 1 | 1 | 1 | 1  |      |      |      |       | 0.69 | 0.50 | 0.56  | 0.41 | 673  | 75.0  | 9.23 |
| Q8IWB6 | Inactive serine/threonine-protein kinase TEX14 OS=Homo sapiens GN=TEX14 PE=1 SV=2 - [TEX14_HUMAN]                     | 1.87  | 1 | 2 | 2 | 2  | 1.56 | 1.10 | 1.21 | 0.86  | 1.13 | 0.94 | 1.07  | 0.89 | 1497 | 167.8 | 5.15 |
| Q8IV63 | Inactive serine/threonine-protein kinase VRK3 OS=Homo sapiens GN=VRK3 PE=1 SV=2 - [VRK3_HUMAN]                        | 1.27  | 1 | 1 | 1 | 1  | 0.89 | 1.06 | 0.81 | 0.97  |      |      |       |      | 474  | 52.8  | 9.04 |
| Q13308 | Inactive tyrosine-protein kinase 7 OS=Homo sapiens GN=PTK7 PE=1 SV=2 - [PTK7_HUMAN]                                   | 1.12  | 1 | 1 | 1 | 2  | 1.00 | 0.99 | 1.10 | 1.10  |      |      |       |      | 1070 | 118.3 | 7.09 |
| A6NCW7 | Inactive ubiquitin carboxyl-terminal hydrolase 17-like protein 4 OS=Homo sapiens GN=USP17L4 PE=3 SV=3 - [U17L4_HUMAN] | 1.32  | 3 | 1 | 1 | 1  |      |      |      |       | 2.71 | 1.57 | 1.15  | 0.67 | 530  | 59.6  | 7.42 |
| Q70EL3 | Inactive ubiquitin carboxyl-terminal hydrolase 50 OS=Homo sapiens GN=USP50 PE=2 SV=1 - [UBP50_HUMAN]                  | 4.13  | 1 | 1 | 1 | 2  | 1.63 | 1.63 | 1.80 | 1.82  | 0.86 | 0.88 | 0.90  | 0.92 | 339  | 38.9  | 6.74 |
| Q70EL1 | Inactive ubiquitin carboxyl-terminal hydrolase 54 OS=Homo sapiens GN=USP54 PE=1 SV=4 - [UBP54_HUMAN]                  | 2.08  | 1 | 1 | 1 | 1  | 0.55 | 0.12 | 0.38 | 0.08  |      |      |       |      | 1684 | 187.3 | 7.28 |
| Q8NI35 | InaD-like protein OS=Homo sapiens GN=INADL PE=1 SV=3 - [INADL_HUMAN]                                                  | 1.55  | 1 | 2 | 2 | 4  | 0.66 | 0.68 | 0.64 | 0.67  | 0.46 | 0.43 | 0.47  | 0.45 | 1801 | 196.2 | 4.94 |
| Q14623 | Indian hedgehog protein OS=Homo sapiens GN=IHH PE=1 SV=4 - [IHH_HUMAN]                                                | 5.60  | 1 | 2 | 2 | 6  | 1.08 | 1.05 | 1.07 | 1.04  | 1.11 | 1.25 | 1.10  | 1.24 | 411  | 45.2  | 8.76 |
| P14902 | Indoleamine 2,3-dioxygenase 1 OS=Homo sapiens GN=IDO1 PE=1 SV=1 - [I23O1_HUMAN]                                       | 9.68  | 1 | 1 | 1 | 1  | 1.19 | 1.08 | 0.85 | 0.78  |      |      |       |      | 403  | 45.3  | 7.30 |
| Q9Y6Y0 | Influenza virus NS1A-binding protein OS=Homo sapiens GN=IVNS1ABP PE=1 SV=3 - [NS1BP_HUMAN]                            | 1.40  | 1 | 1 | 2 | 2  |      |      |      |       | 3.86 | 2.09 | 2.14  | 1.15 | 642  | 71.7  | 5.53 |
| P55103 | Inhibin beta C chain OS=Homo sapiens GN=INHBC PE=1 SV=1 - [INHBC_HUMAN]                                               | 22.44 | 1 | 5 | 5 | 28 | 0.92 | 0.93 | 0.96 | 0.90  | 1.07 | 1.09 | 0.97  | 1.04 | 352  | 38.2  | 7.11 |
| P58166 | Inhibin beta E chain OS=Homo sapiens GN=INHBE PE=1 SV=1 - [INHBE_HUMAN]                                               | 18.00 | 1 | 5 | 5 | 12 | 1.09 | 1.15 | 1.24 | 1.31  | 0.69 | 1.10 | 0.80  | 1.27 | 350  | 38.5  | 9.25 |
| Q9P2D0 | Inhibitor of Bruton tyrosine kinase OS=Homo sapiens GN=IBTK PE=1 SV=3 - [IBTK_HUMAN]                                  | 2.73  | 2 | 2 | 3 | 4  | #### | ###  | #### | 11.77 | 0.67 | 0.87 | 0.77  | 0.99 | 1353 | 150.4 | 7.71 |
| Q9Y2U8 | Inner nuclear membrane protein Man1 OS=Homo sapiens GN=LEMD3 PE=1 SV=2 - [MAN1_HUMAN]                                 | 4.39  | 1 | 2 | 2 | 2  | 0.75 | 0.88 | 1.07 | 1.27  |      |      |       |      | 911  | 99.9  | 7.55 |
| Q9C086 | INO80 complex subunit B OS=Homo sapiens GN=INO80B PE=1 SV=2 - [IN80B_HUMAN]                                           | 1.97  | 1 | 1 | 1 | 1  | 0.77 | 0.79 | 0.85 | 0.88  |      |      |       |      | 356  | 38.6  | 9.61 |
| Q53TQ3 | INO80 complex subunit D OS=Homo sapiens GN=INO80D PE=1 SV=2 - [IN80D_HUMAN]                                           | 3.99  | 1 | 2 | 2 | 2  | 1.94 | 2.15 | 2.06 | 2.28  | 0.88 | 0.45 | 0.85  | 0.43 | 878  | 98.1  | 8.18 |
| Q9H2U2 | Inorganic pyrophosphatase 2, mitochondrial OS=Homo sapiens GN=PPA2 PE=1 SV=2 - [IPYR2_HUMAN]                          | 4.79  | 1 | 1 | 1 | 2  | 1.62 | 1.58 | 1.46 | 1.43  |      |      |       |      | 334  | 37.9  | 7.39 |
| Q15181 | Inorganic pyrophosphatase OS=Homo sapiens GN=PPA1 PE=1 SV=2 - [IPYR_HUMAN]                                            | 7.27  | 1 | 1 | 1 | 4  |      |      |      |       | 0.83 | 1.00 | 0.51  | 0.61 | 289  | 32.6  | 5.86 |
| Q14643 | Inositol 1,4,5-trisphosphate receptor type 1 OS=Homo sapiens GN=ITPR1 PE=1 SV=2 - [ITPR1_HUMAN]                       | 0.44  | 1 | 1 | 1 | 1  | 1.17 | 1.05 | 1.16 | 1.05  |      |      |       |      | 2758 | 313.7 | 6.04 |
| Q14571 | Inositol 1,4,5-trisphosphate receptor type 2 OS=Homo sapiens GN=ITPR2 PE=1 SV=2 - [ITPR2_HUMAN]                       | 2.11  | 1 | 3 | 3 | 4  | 1.24 | 1.17 | 1.29 | 1.24  |      |      |       |      | 2701 | 307.9 | 6.43 |

|        |                                                                                                                          |       |   |    |    |     |      |      |      |      |      |      |       |      |      |       |      |
|--------|--------------------------------------------------------------------------------------------------------------------------|-------|---|----|----|-----|------|------|------|------|------|------|-------|------|------|-------|------|
| Q14573 | Inositol 1,4,5-trisphosphate receptor type 3 OS=Homo sapiens GN=ITPR3 PE=1 SV=2 - [ITPR3_HUMAN]                          | 1.50  | 1 | 2  | 2  | 2   | 0.92 | 1.02 | 0.86 | 1.15 |      | 2671 | 303.9 | 6.48 |      |       |      |
| Q8IWB1 | Inositol 1,4,5-trisphosphate receptor-interacting protein OS=Homo sapiens GN=ITPRIP PE=1 SV=1 - [IPRI_HUMAN]             | 2.56  | 1 | 1  | 1  | 1   | 1.09 | 1.13 | 0.88 | 0.91 |      | 547  | 62.0  | 5.88 |      |       |      |
| P49441 | Inositol polyphosphate 1-phosphatase OS=Homo sapiens GN=INPP1 PE=1 SV=1 - [INPP_HUMAN]                                   | 7.27  | 1 | 1  | 1  | 2   | 1.01 | 1.18 | 0.88 | 1.03 |      | 0.55 | 0.55  | 399  | 44.0 | 5.26  |      |
| P35568 | Insulin receptor substrate 1 OS=Homo sapiens GN=IRS1 PE=1 SV=1 - [IRS1_HUMAN]                                            | 1.05  | 1 | 1  | 1  | 1   | 0.29 | 0.19 | 0.43 | 0.29 |      | 1242 | 131.5 | 8.54 |      |       |      |
| Q9NZ18 | Insulin-like growth factor 2 mRNA-binding protein 1 OS=Homo sapiens GN=IGF2BP1 PE=1 SV=2 - [IF2B1_HUMAN]                 | 1.04  | 1 | 1  | 1  | 1   | 1.19 | 1.38 | 1.21 | 1.40 |      | 577  | 63.4  | 9.20 |      |       |      |
| P05019 | Insulin-like growth factor I OS=Homo sapiens GN=IGF1 PE=1 SV=1 - [IGF1_HUMAN]                                            | 21.54 | 1 | 4  | 4  | 17  |      |      |      |      | 1.40 | 1.34 | 1.27  | 1.30 | 195  | 21.8  | 9.72 |
| P01344 | Insulin-like growth factor II OS=Homo sapiens GN=IGF2 PE=1 SV=1 - [IGF2_HUMAN]                                           | 17.22 | 3 | 2  | 3  | 16  | 1.16 | 1.23 | 1.16 | 1.25 | 1.31 | 0.98 | 1.50  | 1.36 | 180  | 20.1  | 9.32 |
| P08833 | Insulin-like growth factor-binding protein 1 OS=Homo sapiens GN=IGFBP1 PE=1 SV=1 - [IBP1_HUMAN]                          | 5.41  | 1 | 1  | 1  | 3   |      |      |      |      | 1.25 | 1.31 | 1.25  | 1.30 | 259  | 27.9  | 5.19 |
| P18065 | Insulin-like growth factor-binding protein 2 OS=Homo sapiens GN=IGFBP2 PE=1 SV=2 - [IBP2_HUMAN]                          | 19.69 | 1 | 6  | 6  | 18  | 1.09 | 0.95 | 0.96 | 0.85 | 1.23 | 1.21 | 1.23  | 1.19 | 325  | 34.8  | 7.50 |
| P17936 | Insulin-like growth factor-binding protein 3 OS=Homo sapiens GN=IGFBP3 PE=1 SV=2 - [IBP3_HUMAN]                          | 37.80 | 9 | 11 | 12 | 144 | 1.01 | 0.85 | 0.97 | 0.87 | 1.05 | 0.90 | 1.04  | 0.92 | 291  | 31.7  | 8.69 |
| P22692 | Insulin-like growth factor-binding protein 4 OS=Homo sapiens GN=IGFBP4 PE=1 SV=2 - [IBP4_HUMAN]                          | 32.17 | 1 | 7  | 7  | 25  | 0.90 | 1.01 | 0.98 | 1.11 | 1.10 | 1.02 | 1.07  | 1.06 | 258  | 27.9  | 7.15 |
| P24593 | Insulin-like growth factor-binding protein 5 OS=Homo sapiens GN=IGFBP5 PE=1 SV=1 - [IBP5_HUMAN]                          | 20.22 | 1 | 5  | 5  | 21  |      |      |      |      | 1.03 | 1.08 | 1.07  | 1.02 | 272  | 30.6  | 8.21 |
| P24592 | Insulin-like growth factor-binding protein 6 OS=Homo sapiens GN=IGFBP6 PE=1 SV=1 - [IBP6_HUMAN]                          | 37.08 | 2 | 6  | 7  | 17  | 0.82 | 0.89 | 0.81 | 0.87 | 1.29 | 1.10 | 1.15  | 1.06 | 240  | 25.3  | 7.81 |
| Q16270 | Insulin-like growth factor-binding protein 7 OS=Homo sapiens GN=IGFBP7 PE=1 SV=1 - [IBP7_HUMAN]                          | 10.64 | 1 | 2  | 2  | 5   |      |      |      |      | 1.47 | 1.33 | 1.29  | 1.16 | 282  | 29.1  | 7.90 |
| P35858 | Insulin-like growth factor-binding protein complex acid labile subunit OS=Homo sapiens GN=IGFALS PE=1 SV=1 - [ALS_HUMAN] | 49.59 | 1 | 23 | 23 | 438 | 1.09 | 1.09 | 1.05 | 1.08 | 0.97 | 0.96 | 0.98  | 0.98 | 605  | 66.0  | 6.79 |
| Q9Y287 | Integral membrane protein 2B OS=Homo sapiens GN=ITM2B PE=1 SV=1 - [ITM2B_HUMAN]                                          | 8.65  | 1 | 2  | 2  | 6   |      |      |      |      | 1.86 | 1.63 | 1.65  | 1.45 | 266  | 30.3  | 5.14 |
| P98153 | Integral membrane protein DGCR2/IDD OS=Homo sapiens GN=DGCR2 PE=1 SV=1 - [IDD_HUMAN]                                     | 6.73  | 1 | 1  | 1  | 2   | 0.61 | 0.49 |      |      | 1.60 | 1.38 | 0.83  | 0.72 | 550  | 60.8  | 5.30 |
| Q8N201 | Integrator complex subunit 1 OS=Homo sapiens GN=INTS1 PE=1 SV=2 - [INT1_HUMAN]                                           | 0.41  | 1 | 1  | 1  | 1   | 1.02 | 1.53 | 0.85 | 1.26 |      |      |       |      | 2190 | 244.1 | 6.13 |
| Q9NVR2 | Integrator complex subunit 10 OS=Homo sapiens GN=INTS10 PE=1 SV=2 - [INT10_HUMAN]                                        | 2.82  | 1 | 2  | 2  | 3   | 0.84 | 0.87 | 0.85 | 0.89 | 1.25 | 1.22 | 1.10  | 1.08 | 710  | 82.2  | 7.44 |
| Q5TA45 | Integrator complex subunit 11 OS=Homo sapiens GN=CPSF3L PE=1 SV=2 - [INT11_HUMAN]                                        | 2.00  | 1 | 1  | 1  | 2   |      |      |      |      | 0.77 | 0.76 | 0.81  | 0.80 | 600  | 67.6  | 8.06 |
| Q9H0H0 | Integrator complex subunit 2 OS=Homo sapiens GN=INTS2 PE=1 SV=2 - [INT2_HUMAN]                                           | 1.08  | 1 | 1  | 1  | 1   |      |      |      |      | 0.43 | 0.37 | 0.41  | 0.35 | 1204 | 134.2 | 6.05 |
| Q96HW7 | Integrator complex subunit 4 OS=Homo sapiens GN=INTS4 PE=1 SV=2 - [INT4_HUMAN]                                           | 1.87  | 1 | 1  | 1  | 1   |      |      |      |      | 0.69 | 0.62 | 0.66  | 0.60 | 963  | 108.1 | 6.44 |
| Q9UKX5 | Integrin alpha-11 OS=Homo sapiens GN=ITGA11 PE=1 SV=2 - [ITA11_HUMAN]                                                    | 0.76  | 1 | 1  | 1  | 1   |      |      |      |      | 1.40 | 0.93 | 1.49  | 0.99 | 1188 | 133.4 | 6.70 |
| P17301 | Integrin alpha-2 OS=Homo sapiens GN=ITGA2 PE=1 SV=1 - [ITA2_HUMAN]                                                       | 5.59  | 1 | 6  | 6  | 9   | 0.88 | 0.98 | 0.92 | 1.00 | 1.28 | 1.02 | 1.14  | 0.91 | 1181 | 129.2 | 5.31 |
| P26006 | Integrin alpha-3 OS=Homo sapiens GN=ITGA3 PE=1 SV=5 - [ITA3_HUMAN]                                                       | 1.43  | 1 | 1  | 1  | 6   | 1.03 | 1.02 | 1.08 | 1.07 |      |      |       |      | 1051 | 116.5 | 6.77 |
| P13612 | Integrin alpha-4 OS=Homo sapiens GN=ITGA4 PE=1 SV=3 - [ITA4_HUMAN]                                                       | 3.39  | 1 | 2  | 2  | 2   | 0.87 | 1.12 | 0.97 | 1.25 | 1.06 | 0.69 | 1.24  | 0.81 | 1032 | 114.8 | 6.48 |
| P23229 | Integrin alpha-6 OS=Homo sapiens GN=ITGA6 PE=1 SV=4 - [ITA6_HUMAN]                                                       | 0.71  | 1 | 1  | 1  | 2   | 0.76 | 0.81 | 0.67 | 0.72 |      |      |       |      | 1130 | 126.6 | 6.80 |

|        |                                                                                                                      |       |   |    |    |      |      |      |      |      |      |      |      |      |      |       |      |      |      |      |      |      |       |      |
|--------|----------------------------------------------------------------------------------------------------------------------|-------|---|----|----|------|------|------|------|------|------|------|------|------|------|-------|------|------|------|------|------|------|-------|------|
| Q13683 | Integrin alpha-7 OS=Homo sapiens GN=ITGA7 PE=1 SV=3 - [ITA7_HUMAN]                                                   | 0.51  | 1 | 1  | 1  | 1    |      |      |      |      |      |      |      |      |      |       |      | 1.03 | 0.94 | 1.00 | 0.90 | 1181 | 128.9 | 5.73 |
| Q13349 | Integrin alpha-D OS=Homo sapiens GN=ITGAD PE=1 SV=2 - [ITAD_HUMAN]                                                   | 1.21  | 1 | 1  | 1  | 1    |      |      |      |      |      |      |      |      |      |       |      | 0.92 | 0.72 | 0.94 | 0.74 | 1161 | 126.7 | 5.77 |
| P38570 | Integrin alpha-E OS=Homo sapiens GN=ITGAE PE=1 SV=3 - [ITAE_HUMAN]                                                   | 1.27  | 1 | 1  | 1  | 1    | 0.84 | 0.82 | 0.79 | 0.78 |      |      |      |      |      |       |      |      |      |      |      | 1179 | 130.1 | 5.74 |
| P08514 | Integrin alpha-Ilb OS=Homo sapiens GN=ITGA2B PE=1 SV=3 - [ITA2B_HUMAN]                                               | 20.89 | 1 | 15 | 15 | 31   | 0.78 | 0.81 | 0.84 | 0.81 |      |      |      |      |      |       |      |      |      |      |      | 1039 | 113.3 | 5.38 |
| P11215 | Integrin alpha-M OS=Homo sapiens GN=ITGAM PE=1 SV=2 - [ITAM_HUMAN]                                                   | 6.86  | 1 | 6  | 6  | 13   | 1.17 | 1.26 | 1.12 | 1.27 |      |      |      |      |      |       |      |      |      |      |      | 1152 | 127.1 | 7.23 |
| P06756 | Integrin alpha-V OS=Homo sapiens GN=ITGAV PE=1 SV=2 - [ITAV_HUMAN]                                                   | 4.29  | 1 | 2  | 2  | 2    |      |      |      |      |      |      |      |      |      |       |      | 1.03 | 0.79 | 0.76 | 0.65 | 1048 | 116.0 | 5.68 |
| P20702 | Integrin alpha-X OS=Homo sapiens GN=ITGAX PE=1 SV=3 - [ITAX_HUMAN]                                                   | 2.67  | 1 | 2  | 2  | 3    | 1.09 | 1.06 | 0.97 | 0.95 | 0.72 | 0.74 | 0.69 | 0.70 | 1163 | 127.7 | 6.64 |      |      |      |      |      |       |      |
| P05556 | Integrin beta-1 OS=Homo sapiens GN=ITGB1 PE=1 SV=2 - [ITB1_HUMAN]                                                    | 12.28 | 1 | 6  | 6  | 16   | 1.08 | 1.02 | 1.10 | 1.04 |      |      |      |      |      |       |      |      |      |      |      | 798  | 88.4  | 5.39 |
| Q9UKP3 | Integrin beta-1-binding protein 2 OS=Homo sapiens GN=ITGB1BP2 PE=2 SV=1 - [ITBP2_HUMAN]                              | 6.63  | 1 | 1  | 1  | 1    |      |      |      |      |      |      |      |      |      |       |      | 1.06 | 1.92 | 0.55 | 1.00 | 347  | 38.4  | 5.16 |
| P05107 | Integrin beta-2 OS=Homo sapiens GN=ITGB2 PE=1 SV=2 - [ITB2_HUMAN]                                                    | 2.47  | 1 | 2  | 2  | 4    | 1.26 | 1.31 | 1.14 | 1.19 |      |      |      |      |      |       |      |      |      |      |      | 769  | 84.7  | 6.95 |
| P05106 | Integrin beta-3 OS=Homo sapiens GN=ITGB3 PE=1 SV=2 - [ITB3_HUMAN]                                                    | 7.11  | 1 | 4  | 4  | 8    | 1.03 | 0.83 | 0.97 | 0.77 |      |      |      |      |      |       |      |      |      |      |      | 788  | 87.0  | 5.24 |
| P18564 | Integrin beta-6 OS=Homo sapiens GN=ITGB6 PE=1 SV=2 - [ITB6_HUMAN]                                                    | 1.14  | 1 | 1  | 1  | 9    | 0.71 | 0.75 | 0.69 | 0.73 | 0.59 | 0.75 | 0.59 | 0.69 | 788  | 85.9  | 5.55 |      |      |      |      |      |       |      |
| Q9H0C8 | Integrin-linked kinase-associated serine/threonine phosphatase 2C OS=Homo sapiens GN=ILKAP PE=1 SV=1 - [ILKAP_HUMAN] | 9.69  | 1 | 2  | 2  | 3    | 1.12 | 1.06 | 1.06 | 1.00 |      |      |      |      |      |       |      |      |      |      |      | 392  | 42.9  | 7.09 |
| Q13418 | Integrin-linked protein kinase OS=Homo sapiens GN=ILK PE=1 SV=2 - [ILK_HUMAN]                                        | 10.62 | 1 | 5  | 5  | 17   | 0.75 | 0.73 | 0.69 | 0.78 | 2.08 | 2.14 | 1.87 | 1.95 | 452  | 51.4  | 8.07 |      |      |      |      |      |       |      |
| Q8WWA0 | Intelectin-1 OS=Homo sapiens GN=ITLN1 PE=1 SV=1 - [ITLN1_HUMAN]                                                      | 12.78 | 2 | 4  | 4  | 9    | 1.01 | 0.98 | 1.04 | 1.00 |      |      |      |      |      |       |      |      |      |      |      | 313  | 34.9  | 6.01 |
| P19827 | Inter-alpha-trypsin inhibitor heavy chain H1 OS=Homo sapiens GN=ITIH1 PE=1 SV=3 - [ITIH1_HUMAN]                      | 55.10 | 1 | 41 | 41 | 2870 | 1.09 | 1.10 | 1.11 | 1.10 | 1.14 | 1.23 | 1.14 | 1.26 | 911  | 101.3 | 6.79 |      |      |      |      |      |       |      |
| P19823 | Inter-alpha-trypsin inhibitor heavy chain H2 OS=Homo sapiens GN=ITIH2 PE=1 SV=2 - [ITIH2_HUMAN]                      | 56.13 | 1 | 51 | 51 | 2045 | 1.12 | 1.14 | 1.19 | 1.20 | 1.23 | 1.23 | 1.24 | 1.25 | 946  | 106.4 | 6.86 |      |      |      |      |      |       |      |
| Q06033 | Inter-alpha-trypsin inhibitor heavy chain H3 OS=Homo sapiens GN=ITIH3 PE=1 SV=2 - [ITIH3_HUMAN]                      | 39.21 | 1 | 28 | 28 | 532  | 0.97 | 0.92 | 0.96 | 0.95 | 1.04 | 1.05 | 1.04 | 1.07 | 890  | 99.8  | 5.74 |      |      |      |      |      |       |      |
| Q14624 | Inter-alpha-trypsin inhibitor heavy chain H4 OS=Homo sapiens GN=ITIH4 PE=1 SV=4 - [ITIH4_HUMAN]                      | 67.10 | 2 | 63 | 63 | 2797 | 1.27 | 1.30 | 1.26 | 1.28 | 1.29 | 1.34 | 1.29 | 1.37 | 930  | 103.3 | 6.98 |      |      |      |      |      |       |      |
| P05362 | Intercellular adhesion molecule 1 OS=Homo sapiens GN=ICAM1 PE=1 SV=2 - [ICAM1_HUMAN]                                 | 21.99 | 1 | 10 | 10 | 23   | 1.15 | 1.08 | 1.09 | 1.02 | 0.76 | 0.77 | 0.75 | 0.75 | 532  | 57.8  | 7.99 |      |      |      |      |      |       |      |
| P13598 | Intercellular adhesion molecule 2 OS=Homo sapiens GN=ICAM2 PE=1 SV=2 - [ICAM2_HUMAN]                                 | 23.27 | 1 | 6  | 6  | 42   | 1.43 | 1.35 | 1.43 | 1.33 | 1.12 | 1.04 | 0.90 | 0.90 | 275  | 30.6  | 7.43 |      |      |      |      |      |       |      |
| P32942 | Intercellular adhesion molecule 3 OS=Homo sapiens GN=ICAM3 PE=1 SV=2 - [ICAM3_HUMAN]                                 | 6.76  | 1 | 3  | 3  | 5    | 1.00 | 0.91 | 0.95 | 0.87 |      |      |      |      |      |       |      |      |      |      |      | 547  | 59.5  | 5.43 |
| Q9UMF0 | Intercellular adhesion molecule 5 OS=Homo sapiens GN=ICAM5 PE=1 SV=3 - [ICAM5_HUMAN]                                 | 2.49  | 1 | 1  | 1  | 1    | 0.82 | 0.66 | 0.71 | 0.57 |      |      |      |      |      |       |      |      |      |      |      | 924  | 97.1  | 5.95 |
| Q96BM0 | Interferon alpha-inducible protein 27-like protein 1 OS=Homo sapiens GN=IFI27L1 PE=2 SV=1 - [I27L1_HUMAN]            | 33.65 | 1 | 1  | 1  | 2    | 1.00 | 0.84 | 1.04 | 0.88 |      |      |      |      |      |       |      |      |      |      |      | 104  | 9.5   | 9.72 |
| Q86WN2 | Interferon epsilon OS=Homo sapiens GN=IFNE PE=2 SV=1 - [IFNE_HUMAN]                                                  | 7.21  | 1 | 1  | 1  | 19   | 1.57 | 1.63 | 1.81 | 1.81 |      |      |      |      |      |       |      |      |      |      |      | 208  | 24.4  | 8.57 |
| P38484 | Interferon gamma receptor 2 OS=Homo sapiens GN=IFNGR2 PE=1 SV=2 - [INGR2_HUMAN]                                      | 3.86  | 1 | 1  | 1  | 1    | 1.09 | 1.03 | 1.13 | 1.07 |      |      |      |      |      |       |      |      |      |      |      | 337  | 37.8  | 5.47 |
| Q14653 | Interferon regulatory factor 3 OS=Homo sapiens GN=IRF3 PE=1 SV=1 - [IRF3_HUMAN]                                      | 4.92  | 1 | 1  | 1  | 1    |      |      |      |      |      |      |      |      |      |       |      | 0.78 | 0.82 | 0.77 | 0.80 | 427  | 47.2  | 5.34 |



|        |                                                                                                       |       |   |    |    |    |      |      |      |      |      |      |      |      |      |       |       |
|--------|-------------------------------------------------------------------------------------------------------|-------|---|----|----|----|------|------|------|------|------|------|------|------|------|-------|-------|
| Q02556 | Interferon regulatory factor 8 OS=Homo sapiens GN=IRF8 PE=1 SV=2 - [IRF8_HUMAN]                       | 2.82  | 1 | 1  | 1  | 1  |      |      |      |      | 1.12 | 1.13 | 1.07 | 1.09 | 426  | 48.3  | 6.77  |
| Q00978 | Interferon regulatory factor 9 OS=Homo sapiens GN=IRF9 PE=1 SV=1 - [IRF9_HUMAN]                       | 2.80  | 1 | 1  | 1  | 1  |      |      |      |      | 1.04 | 1.01 | 1.01 | 0.99 | 393  | 43.7  | 5.77  |
| P20591 | Interferon-induced GTP-binding protein Mx1 OS=Homo sapiens GN=MX1 PE=1 SV=4 - [MX1_HUMAN]             | 0.91  | 1 | 1  | 1  | 1  |      |      |      |      | 1.19 | 0.81 | 1.08 | 0.74 | 662  | 75.5  | 5.83  |
| Q7Z2Y8 | Interferon-induced very large GTPase 1 OS=Homo sapiens GN=GVINP1 PE=2 SV=2 - [GVIN1_HUMAN]            | 1.82  | 1 | 3  | 3  | 5  | 0.95 | 0.95 | 0.89 | 0.89 |      |      |      |      | 2422 | 278.9 | 6.55  |
| Q12905 | Interleukin enhancer-binding factor 2 OS=Homo sapiens GN=ILF2 PE=1 SV=2 - [ILF2_HUMAN]                | 2.82  | 1 | 1  | 1  | 1  |      |      |      |      | 2.21 | 1.88 | 2.25 | 1.92 | 390  | 43.0  | 5.26  |
| Q12906 | Interleukin enhancer-binding factor 3 OS=Homo sapiens GN=ILF3 PE=1 SV=3 - [ILF3_HUMAN]                | 3.47  | 1 | 1  | 1  | 1  | 1.20 | 1.39 | 1.10 | 1.28 |      |      |      |      | 894  | 95.3  | 8.76  |
| Q9NPH3 | Interleukin-1 receptor accessory protein OS=Homo sapiens GN=IL1RAP PE=1 SV=2 - [IL1AP_HUMAN]          | 14.56 | 1 | 10 | 10 | 59 | 1.31 | 1.27 | 1.23 | 1.21 | 1.03 | 0.97 | 0.95 | 0.95 | 570  | 65.4  | 8.12  |
| Q9NZN1 | Interleukin-1 receptor accessory protein-like 1 OS=Homo sapiens GN=IL1RAPL1 PE=1 SV=2 - [IRPL1_HUMAN] | 1.72  | 1 | 1  | 1  | 2  | 0.95 | 1.02 | 0.96 | 1.04 |      |      |      |      | 696  | 79.9  | 6.23  |
| P27930 | Interleukin-1 receptor type 2 OS=Homo sapiens GN=IL1R2 PE=1 SV=1 - [IL1R2_HUMAN]                      | 2.26  | 1 | 1  | 1  | 2  | 1.22 | 1.32 | 1.21 | 1.33 |      |      |      |      | 398  | 45.4  | 7.90  |
| Q9HB29 | Interleukin-1 receptor-like 2 OS=Homo sapiens GN=IL1RL2 PE=2 SV=2 - [ILRL2_HUMAN]                     | 2.78  | 2 | 2  | 2  | 2  | 0.99 | 1.11 | 1.13 | 1.28 |      |      |      |      | 575  | 65.4  | 7.46  |
| P20809 | Interleukin-11 OS=Homo sapiens GN=IL11 PE=1 SV=1 - [IL11_HUMAN]                                       | 16.58 | 1 | 1  | 1  | 1  |      |      |      |      | 0.51 | 0.69 | 0.64 | 0.87 | 199  | 21.4  | 10.62 |
| Q99665 | Interleukin-12 receptor subunit beta-2 OS=Homo sapiens GN=IL12RB2 PE=1 SV=1 - [I12R2_HUMAN]           | 1.74  | 1 | 1  | 1  | 1  |      |      |      |      | 0.88 | 1.05 | 0.77 | 0.92 | 862  | 97.1  | 7.75  |
| P78552 | Interleukin-13 receptor subunit alpha-1 OS=Homo sapiens GN=IL13RA1 PE=1 SV=1 - [I13R1_HUMAN]          | 5.85  | 1 | 1  | 1  | 1  | 1.24 | 1.43 | 0.94 | 1.08 |      |      |      |      | 427  | 48.7  | 6.01  |
| Q14627 | Interleukin-13 receptor subunit alpha-2 OS=Homo sapiens GN=IL13RA2 PE=1 SV=1 - [I13R2_HUMAN]          | 2.37  | 1 | 1  | 1  | 3  |      |      |      |      | 0.94 | 0.97 | 0.92 | 0.91 | 380  | 44.1  | 4.97  |
| P40933 | Interleukin-15 OS=Homo sapiens GN=IL15 PE=1 SV=1 - [IL15_HUMAN]                                       | 22.22 | 1 | 1  | 1  | 1  |      |      |      |      | 0.95 | 0.71 | 1.05 | 0.78 | 162  | 18.1  | 5.27  |
| Q8NFR9 | Interleukin-17 receptor E OS=Homo sapiens GN=IL17RE PE=1 SV=1 - [I17RE_HUMAN]                         | 3.45  | 1 | 1  | 1  | 1  | 0.81 | 0.81 | 0.83 | 0.84 |      |      |      |      | 667  | 74.8  | 9.22  |
| Q8TAD2 | Interleukin-17D OS=Homo sapiens GN=IL17D PE=2 SV=1 - [IL17D_HUMAN]                                    | 7.92  | 1 | 1  | 1  | 1  |      |      |      |      | 0.78 | 0.94 | 0.93 | 1.13 | 202  | 21.9  | 8.98  |
| O95998 | Interleukin-18-binding protein OS=Homo sapiens GN=IL18BP PE=1 SV=2 - [I18BP_HUMAN]                    | 14.95 | 1 | 3  | 3  | 7  | 1.46 | 1.45 | 1.37 | 1.37 | 0.80 | 0.62 | 0.98 | 0.77 | 194  | 21.1  | 7.39  |
| P60568 | Interleukin-2 OS=Homo sapiens GN=IL2 PE=1 SV=1 - [IL2_HUMAN]                                          | 8.50  | 1 | 1  | 1  | 1  |      |      |      |      | 1.88 | 1.38 | 1.61 | 1.18 | 153  | 17.6  | 7.80  |
| P14784 | Interleukin-2 receptor subunit beta OS=Homo sapiens GN=IL2RB PE=1 SV=1 - [IL2RB_HUMAN]                | 3.09  | 1 | 1  | 1  | 1  | 0.65 | 0.59 | 0.71 | 0.65 |      |      |      |      | 551  | 61.1  | 5.05  |
| Q9UHF4 | Interleukin-20 receptor subunit alpha OS=Homo sapiens GN=IL20RA PE=1 SV=2 - [I20RA_HUMAN]             | 2.71  | 1 | 1  | 1  | 2  |      |      |      |      | 1.27 | 1.04 | 1.37 | 1.12 | 553  | 62.4  | 4.84  |
| Q13007 | Interleukin-24 OS=Homo sapiens GN=IL24 PE=1 SV=1 - [IL24_HUMAN]                                       | 13.59 | 1 | 1  | 1  | 1  |      |      |      |      | 0.69 | 0.61 | 2.66 | 2.35 | 206  | 23.8  | 8.72  |
| Q14213 | Interleukin-27 subunit beta OS=Homo sapiens GN=EBI3 PE=1 SV=2 - [IL27B_HUMAN]                         | 4.80  | 1 | 1  | 1  | 3  | 3.21 | 3.47 | 3.32 | 3.63 | 4.34 | 5.11 | 4.11 | 4.84 | 229  | 25.4  | 9.25  |
| Q9UHA7 | Interleukin-36 alpha OS=Homo sapiens GN=IL36A PE=1 SV=1 - [IL36A_HUMAN]                               | 7.59  | 1 | 1  | 1  | 1  |      |      |      |      | 0.56 | 0.59 | 0.70 | 0.75 | 158  | 17.7  | 6.30  |
| P05231 | Interleukin-6 OS=Homo sapiens GN=IL6 PE=1 SV=1 - [IL6_HUMAN]                                          | 8.49  | 1 | 1  | 1  | 1  | 0.87 | 0.54 | 1.02 | 0.64 |      |      |      |      | 212  | 23.7  | 6.57  |
| P08887 | Interleukin-6 receptor subunit alpha OS=Homo sapiens GN=IL6R PE=1 SV=1 - [IL6RA_HUMAN]                | 20.73 | 1 | 5  | 5  | 11 | 0.98 | 1.00 | 1.02 | 1.05 | 1.09 | 1.22 | 0.98 | 1.10 | 468  | 51.5  | 8.22  |
| P40189 | Interleukin-6 receptor subunit beta OS=Homo sapiens GN=IL6ST PE=1 SV=2 - [IL6RB_HUMAN]                | 2.18  | 1 | 1  | 1  | 5  |      |      |      |      | 1.09 | 1.09 | 0.93 | 0.93 | 918  | 103.5 | 5.95  |

|        |                                                                                                                |      |   |   |   |    |      |      |      |      |      |      |      |      |      |       |       |      |       |      |
|--------|----------------------------------------------------------------------------------------------------------------|------|---|---|---|----|------|------|------|------|------|------|------|------|------|-------|-------|------|-------|------|
| P10145 | Interleukin-8 OS=Homo sapiens GN=IL8 PE=1 SV=1 - [IL8_HUMAN]                                                   | 9.09 | 1 | 1 | 1 | 2  |      |      |      |      |      |      |      | 1.86 | 1.98 | 1.77  | 1.88  | 99   | 11.1  | 8.84 |
| Q9BZV3 | Interphotoreceptor matrix proteoglycan 2 OS=Homo sapiens GN=IMPG2 PE=1 SV=3 - [IMPG2_HUMAN]                    | 0.56 | 1 | 1 | 1 | 1  |      |      |      |      |      |      |      | 1.09 | 0.79 | 0.87  | 0.63  | 1241 | 138.5 | 4.61 |
| Q15811 | Intersectin-1 OS=Homo sapiens GN=ITSN1 PE=1 SV=3 - [ITSN1_HUMAN]                                               | 0.46 | 1 | 1 | 1 | 5  | 1.27 | 1.19 | 1.33 | 1.25 | 0.89 | 1.08 | 0.97 | 1.20 | 1721 | 195.3 | 7.77  |      |       |      |
| P03956 | Interstitial collagenase OS=Homo sapiens GN=MMP1 PE=1 SV=3 - [MMP1_HUMAN]                                      | 3.20 | 1 | 1 | 1 | 1  |      |      |      |      |      |      |      | 1.00 | 0.84 | 0.92  | 0.77  | 469  | 54.0  | 6.96 |
| Q2M1V0 | Intestine-specific homeobox OS=Homo sapiens GN=ISX PE=2 SV=2 - [ISX_HUMAN]                                     | 8.98 | 1 | 2 | 2 | 3  | 1.04 | 1.16 | 1.01 | 1.14 | 2.01 | 2.41 | 2.09 | 2.50 | 245  | 27.0  | 8.56  |      |       |      |
| Q9HBG6 | Intraflagellar transport protein 122 homolog OS=Homo sapiens GN=IFT122 PE=1 SV=2 - [IFT122_HUMAN]              | 3.30 | 1 | 2 | 2 | 3  | 0.86 | 0.82 | 0.80 | 0.76 |      |      |      |      | 1241 | 141.7 | 6.49  |      |       |      |
| Q96RY7 | Intraflagellar transport protein 140 homolog OS=Homo sapiens GN=IFT140 PE=1 SV=1 - [IFT140_HUMAN]              | 1.30 | 1 | 1 | 1 | 1  | 1.97 | 1.24 | 1.62 | 1.03 |      |      |      |      | 1462 | 165.1 | 6.04  |      |       |      |
| Q9UG01 | Intraflagellar transport protein 172 homolog OS=Homo sapiens GN=IFT172 PE=1 SV=2 - [IFT172_HUMAN]              | 1.37 | 1 | 2 | 2 | 2  |      |      |      |      | 1.10 | 1.26 | 0.97 | 1.11 | 1749 | 197.5 | 6.13  |      |       |      |
| Q13099 | Intraflagellar transport protein 88 homolog OS=Homo sapiens GN=IFT88 PE=2 SV=2 - [IFT88_HUMAN]                 | 5.16 | 1 | 2 | 2 | 2  | 1.59 | 1.63 | 1.63 | 1.69 |      |      |      |      | 833  | 94.2  | 6.54  |      |       |      |
| O60306 | Intron-binding protein aquarius OS=Homo sapiens GN=AQR PE=1 SV=4 - [AQR_HUMAN]                                 | 1.55 | 1 | 1 | 1 | 1  |      |      |      |      | 0.85 | 0.84 | 0.79 | 0.78 | 1485 | 171.2 | 6.37  |      |       |      |
| Q27J81 | Inverted formin-2 OS=Homo sapiens GN=INF2 PE=1 SV=2 - [INF2_HUMAN]                                             | 3.44 | 1 | 3 | 3 | 5  | 0.78 | 1.00 | 0.71 | 0.91 |      |      |      |      | 1249 | 135.5 | 5.38  |      |       |      |
| Q9NP19 | Inward rectifier potassium channel 16 OS=Homo sapiens GN=KCNJ16 PE=2 SV=1 - [IRK16_HUMAN]                      | 1.91 | 1 | 1 | 1 | 1  | 0.88 | 0.91 | 1.08 | 1.12 |      |      |      |      | 418  | 47.9  | 7.87  |      |       |      |
| Q8N2Y8 | Iporin OS=Homo sapiens GN=RUSC2 PE=1 SV=3 - [RUSC2_HUMAN]                                                      | 1.65 | 1 | 1 | 1 | 5  | 0.93 | 0.96 | 0.83 | 0.88 | 2.08 | 1.19 | 1.73 | 0.99 | 1516 | 161.1 | 6.62  |      |       |      |
| Q8NA54 | IQ and ubiquitin-like domain-containing protein OS=Homo sapiens GN=IQUB PE=1 SV=2 - [IQUB_HUMAN]               | 2.02 | 1 | 1 | 1 | 1  |      |      |      |      | 0.90 | 0.72 | 1.55 | 1.24 | 791  | 92.5  | 6.67  |      |       |      |
| Q15051 | IQ calmodulin-binding motif-containing protein 1 OS=Homo sapiens GN=IQCB1 PE=1 SV=1 - [IQCB1_HUMAN]            | 5.18 | 1 | 2 | 2 | 14 |      |      |      |      | 0.65 | 0.85 | 0.63 | 0.77 | 598  | 68.9  | 9.10  |      |       |      |
| A8MTL0 | IQ domain-containing protein F5 OS=Homo sapiens GN=IQCF5 PE=2 SV=2 - [IQCF5_HUMAN]                             | 4.05 | 1 | 1 | 1 | 3  |      |      |      |      | 6.36 | 1.25 | #### |      | 148  | 18.0  | 10.01 |      |       |      |
| Q9H095 | IQ domain-containing protein G OS=Homo sapiens GN=IQCG PE=2 SV=1 - [IQCG_HUMAN]                                | 5.19 | 1 | 2 | 2 | 2  |      |      |      |      | 1.36 | 1.37 | 1.28 | 1.29 | 443  | 51.9  | 6.52  |      |       |      |
| Q5JU85 | IQ motif and SEC7 domain-containing protein 2 OS=Homo sapiens GN=IQSEC2 PE=1 SV=1 - [IQEC2_HUMAN]              | 1.62 | 1 | 2 | 2 | 3  |      |      |      |      | 0.59 | 0.65 | 0.68 | 0.79 | 1478 | 161.6 | 8.56  |      |       |      |
| Q8IWL3 | Iron-sulfur cluster co-chaperone protein HscB, mitochondrial OS=Homo sapiens GN=HSCB PE=1 SV=3 - [HSC20_HUMAN] | 7.66 | 1 | 2 | 2 | 3  | 0.82 | 0.78 | 0.86 | 0.83 |      |      |      |      | 235  | 27.4  | 7.69  |      |       |      |
| Q8TB37 | Iron-sulfur protein NUBPL OS=Homo sapiens GN=NUBPL PE=1 SV=3 - [NUBPL_HUMAN]                                   | 4.08 | 1 | 1 | 1 | 2  | 0.77 | 0.94 | 0.74 | 0.90 |      |      |      |      | 319  | 34.1  | 9.04  |      |       |      |
| P78411 | Iroquois-class homeodomain protein IRX-5 OS=Homo sapiens GN=IRX5 PE=2 SV=3 - [IRX5_HUMAN]                      | 3.93 | 6 | 2 | 2 | 2  | 1.21 | 1.00 | 1.23 | 1.02 | 0.08 | 0.09 | 0.38 | 0.41 | 483  | 50.3  | 6.47  |      |       |      |
| Q9UKU7 | Isobutyryl-CoA dehydrogenase, mitochondrial OS=Homo sapiens GN=ACAD8 PE=1 SV=1 - [ACAD8_HUMAN]                 | 4.34 | 1 | 1 | 1 | 2  |      |      |      |      | 0.73 | 0.74 | 0.73 | 0.75 | 415  | 45.0  | 7.85  |      |       |      |
| P50213 | Isocitrate dehydrogenase [NAD] subunit alpha, mitochondrial OS=Homo sapiens GN=IDH3A PE=1 SV=1 - [IDH3A_HUMAN] | 2.46 | 1 | 1 | 1 | 1  |      |      |      |      | 0.77 | 0.26 | 0.90 | 0.30 | 366  | 39.6  | 6.92  |      |       |      |
| P26440 | Isovaleryl-CoA dehydrogenase, mitochondrial OS=Homo sapiens GN=IVD PE=1 SV=1 - [IVD_HUMAN]                     | 3.07 | 1 | 1 | 1 | 1  | 1.33 | 1.25 | 1.43 | 1.34 |      |      |      |      | 423  | 46.3  | 8.19  |      |       |      |
| Q8IYV9 | Izumo sperm-egg fusion protein 1 OS=Homo sapiens GN=IZUMO1 PE=1 SV=2 - [IZUM1_HUMAN]                           | 6.57 | 1 | 1 | 1 | 1  | 1.44 | 1.30 | 0.87 | 0.79 |      |      |      |      | 350  | 38.9  | 6.54  |      |       |      |
| Q96N16 | Janus kinase and microtubule-interacting protein 1 OS=Homo sapiens GN=JAKMIP1 PE=1 SV=1 - [JKIP1_HUMAN]        | 1.92 | 1 | 1 | 1 | 3  | 0.42 | 1.25 | 0.52 | 1.57 |      |      |      |      | 626  | 73.2  | 6.10  |      |       |      |
| Q9H9V9 | JmjC domain-containing protein 4 OS=Homo sapiens GN=JMJD4 PE=2 SV=2 - [JMJD4_HUMAN]                            | 2.81 | 1 | 1 | 1 | 1  |      |      |      |      | 0.82 | 0.79 | 0.74 | 0.72 | 463  | 52.5  | 6.21  |      |       |      |

|        |                                                                                                                 |       |   |    |    |     |      |      |      |      |      |      |       |      |      |       |      |
|--------|-----------------------------------------------------------------------------------------------------------------|-------|---|----|----|-----|------|------|------|------|------|------|-------|------|------|-------|------|
| Q8N9B5 | Junction-mediating and -regulatory protein OS=Homo sapiens GN=JMY PE=1 SV=2 - [JMY_HUMAN]                       | 0.71  | 1 | 1  | 1  | 1   | 1.42 | 1.39 | 1.42 | 1.41 |      | 988  | 111.4 | 6.18 |      |       |      |
| Q9Y624 | Junctional adhesion molecule A OS=Homo sapiens GN=F11R PE=1 SV=1 - [JAM1_HUMAN]                                 | 2.34  | 1 | 1  | 1  | 1   |      |      |      |      | 0.07 | 0.97 | 0.33  | 4.62 | 299  | 32.6  | 7.90 |
| Q9P266 | Junctional protein associated with coronary artery disease OS=Homo sapiens GN=KIAA1462 PE=1 SV=3 - [JCAD_HUMAN] | 1.18  | 1 | 1  | 1  | 1   | 0.35 | 0.30 | 0.45 | 0.38 |      | 1359 | 148.3 | 7.09 |      |       |      |
| Q9BR39 | Junctophilin-2 OS=Homo sapiens GN=JPH2 PE=1 SV=2 - [JPH2_HUMAN]                                                 | 2.01  | 1 | 1  | 1  | 1   | 0.73 | 0.29 | 0.44 | 0.18 |      | 696  | 74.2  | 8.72 |      |       |      |
| O60229 | Kalirin OS=Homo sapiens GN=KALRN PE=1 SV=2 - [KALRN_HUMAN]                                                      | 1.71  | 1 | 3  | 3  | 5   | 0.72 | 0.04 | 0.87 | 0.05 | 1.19 | 1.25 | 1.23  | 1.28 | 2985 | 340.0 | 6.07 |
| Q92876 | Kallikrein-6 OS=Homo sapiens GN=KLK6 PE=1 SV=1 - [KLK6_HUMAN]                                                   | 4.92  | 1 | 1  | 1  | 3   |      |      |      |      | 1.12 | 1.09 | 1.12  | 1.09 | 244  | 26.8  | 7.44 |
| P49862 | Kallikrein-7 OS=Homo sapiens GN=KLK7 PE=1 SV=1 - [KLK7_HUMAN]                                                   | 9.88  | 1 | 1  | 1  | 3   | 1.15 | 2.07 | 0.69 | 1.24 | 1.20 | 1.54 |       | 253  | 27.5 | 8.47  |      |
| P29622 | Kallistatin OS=Homo sapiens GN=SERPINA4 PE=1 SV=3 - [KAIN_HUMAN]                                                | 52.22 | 1 | 21 | 21 | 318 | 1.07 | 1.11 | 1.11 | 1.14 | 1.00 | 1.14 | 0.98  | 1.10 | 427  | 48.5  | 7.75 |
| Q7Z3B3 | KAT8 regulatory NSL complex subunit 1 OS=Homo sapiens GN=KANSL1 PE=1 SV=2 - [KANL1_HUMAN]                       | 1.54  | 1 | 1  | 1  | 1   | 0.77 | 0.82 | 0.79 | 0.84 |      | 1105 | 121.0 | 8.81 |      |       |      |
| A0AUZ9 | KAT8 regulatory NSL complex subunit 1-like protein OS=Homo sapiens GN=KANSL1L PE=1 SV=2 - [KAL1L_HUMAN]         | 0.61  | 1 | 1  | 1  | 1   |      |      |      |      | 0.77 | 1.04 | 0.74  | 1.02 | 987  | 112.2 | 8.44 |
| Q9P2N6 | KAT8 regulatory NSL complex subunit 3 OS=Homo sapiens GN=KANSL3 PE=1 SV=2 - [KANL3_HUMAN]                       | 3.65  | 1 | 1  | 1  | 10  | 0.83 | 0.48 | 0.95 | 0.55 |      | 904  | 95.9  | 9.39 |      |       |      |
| Q8IYD2 | Kelch domain-containing protein 8A OS=Homo sapiens GN=KLHDC8A PE=2 SV=2 - [KLD8A_HUMAN]                         | 4.29  | 1 | 1  | 1  | 2   | 1.00 | 1.08 | 1.22 | 1.34 |      | 350  | 38.8  | 9.26 |      |       |      |
| Q8IXV7 | Kelch domain-containing protein 8B OS=Homo sapiens GN=KLHDC8B PE=2 SV=1 - [KLD8B_HUMAN]                         | 5.08  | 1 | 1  | 1  | 1   | 0.56 | 0.50 | 0.62 | 0.54 |      | 354  | 37.7  | 8.27 |      |       |      |
| Q8NAB2 | Kelch repeat and BTB domain-containing protein 3 OS=Homo sapiens GN=KBTBD3 PE=2 SV=2 - [KBTB3_HUMAN]            | 2.14  | 1 | 1  | 1  | 1   |      |      |      |      | 1.05 | 1.26 | 1.09  | 1.31 | 608  | 69.3  | 5.39 |
| Q8WVZ9 | Kelch repeat and BTB domain-containing protein 7 OS=Homo sapiens GN=KBTBD7 PE=1 SV=1 - [KBTB7_HUMAN]            | 9.65  | 2 | 3  | 3  | 7   | 0.90 | 0.86 | 1.00 | 0.97 |      | 684  | 77.1  | 5.57 |      |       |      |
| Q8NFY9 | Kelch repeat and BTB domain-containing protein 8 OS=Homo sapiens GN=KBTBD8 PE=2 SV=2 - [KBTB8_HUMAN]            | 2.16  | 1 | 1  | 1  | 2   | 0.69 | 0.59 | 0.71 | 0.61 |      | 601  | 68.8  | 6.29 |      |       |      |
| Q53G59 | Kelch-like protein 12 OS=Homo sapiens GN=KLHL12 PE=1 SV=2 - [KLH12_HUMAN]                                       | 1.76  | 1 | 1  | 1  | 1   |      |      |      |      | 1.12 | 0.64 | 1.30  | 0.74 | 568  | 63.2  | 5.44 |
| Q9P2G3 | Kelch-like protein 14 OS=Homo sapiens GN=KLHL14 PE=1 SV=2 - [KLH14_HUMAN]                                       | 2.87  | 1 | 1  | 1  | 2   | 1.13 | 0.68 | 0.93 | 0.56 |      | 628  | 70.7  | 6.68 |      |       |      |
| O95198 | Kelch-like protein 2 OS=Homo sapiens GN=KLHL2 PE=1 SV=2 - [KLH2_HUMAN]                                          | 1.69  | 1 | 1  | 1  | 1   |      |      |      |      | 1.12 | 0.75 | 0.81  | 0.54 | 593  | 65.9  | 6.74 |
| Q9UJP4 | Kelch-like protein 21 OS=Homo sapiens GN=KLHL21 PE=1 SV=4 - [KLH21_HUMAN]                                       | 1.68  | 1 | 1  | 1  | 1   |      |      |      |      | 3.00 | 7.04 | 2.10  | 4.95 | 597  | 66.6  | 5.36 |
| Q8NBE8 | Kelch-like protein 23 OS=Homo sapiens GN=KLHL23 PE=2 SV=1 - [KLH23_HUMAN]                                       | 1.79  | 1 | 1  | 1  | 1   |      |      |      |      | 0.57 | 0.90 | 1.19  | 1.88 | 558  | 63.9  | 5.62 |
| Q6TFL4 | Kelch-like protein 24 OS=Homo sapiens GN=KLHL24 PE=2 SV=1 - [KLH24_HUMAN]                                       | 2.33  | 1 | 1  | 1  | 1   | 1.05 | 1.04 | 1.03 | 1.02 |      | 600  | 68.3  | 6.39 |      |       |      |
| Q9H511 | Kelch-like protein 31 OS=Homo sapiens GN=KLHL31 PE=2 SV=1 - [KLH31_HUMAN]                                       | 4.57  | 1 | 1  | 1  | 4   | 1.09 | 1.48 | 1.06 | 1.46 | 1.55 | 1.42 | 1.28  | 1.17 | 634  | 70.2  | 6.73 |
| Q8N239 | Kelch-like protein 34 OS=Homo sapiens GN=KLHL34 PE=2 SV=1 - [KLH34_HUMAN]                                       | 6.52  | 1 | 1  | 1  | 1   |      |      |      |      | 1.11 | 1.35 | 1.09  | 1.33 | 644  | 70.6  | 5.60 |
| A6NCN2 | Keratin-81-like protein OS=Homo sapiens PE=2 SV=3 - [KT81L_HUMAN]                                               | 8.02  | 1 | 1  | 3  | 7   |      |      |      |      | 7.98 | 7.39 | 1.78  | 1.65 | 486  | 53.4  | 6.35 |
| Q8N1A0 | Keratin-like protein KRT222 OS=Homo sapiens GN=KRT222 PE=2 SV=1 - [KT222_HUMAN]                                 | 9.83  | 1 | 1  | 1  | 1   | 1.05 | 1.06 | 1.06 | 1.07 |      | 295  | 34.1  | 5.87 |      |       |      |
| Q14525 | Keratin, type I cuticular Ha3-II OS=Homo sapiens GN=KRT33B PE=2 SV=3 - [KT33B_HUMAN]                            | 3.71  | 9 | 1  | 2  | 11  |      |      |      |      | 6.16 | 4.64 | 1.70  | 1.28 | 404  | 46.2  | 4.84 |



|        |                                                                                                            |       |   |    |    |      |      |      |      |      |      |      |      |      |      |      |      |       |      |
|--------|------------------------------------------------------------------------------------------------------------|-------|---|----|----|------|------|------|------|------|------|------|------|------|------|------|------|-------|------|
| Q12840 | Kinesin heavy chain isoform 5A OS=Homo sapiens GN=KIF5A PE=1 SV=2 - [KIF5A_HUMAN]                          | 3.00  | 1 | 3  | 3  | 4    |      |      |      |      |      |      | 1.71 | 1.68 | 1.56 | 1.53 | 1032 | 117.3 | 5.90 |
| O60282 | Kinesin heavy chain isoform 5C OS=Homo sapiens GN=KIF5C PE=1 SV=1 - [KIF5C_HUMAN]                          | 0.94  | 1 | 1  | 1  | 1    |      |      |      |      |      |      | 1.07 | 1.03 | 1.02 | 0.98 | 957  | 109.4 | 6.19 |
| Q07866 | Kinesin light chain 1 OS=Homo sapiens GN=KLC1 PE=1 SV=2 - [KLC1_HUMAN]                                     | 5.06  | 1 | 1  | 1  | 1    | 0.84 | 0.93 | 0.88 | 0.97 |      |      |      |      |      |      | 573  | 65.3  | 6.20 |
| Q96FN5 | Kinesin-like protein KIF12 OS=Homo sapiens GN=KIF12 PE=2 SV=3 - [KIF12_HUMAN]                              | 1.70  | 1 | 1  | 1  | 5    |      |      |      |      |      |      | 0.82 | 0.72 | 0.85 | 0.70 | 646  | 70.6  | 8.85 |
| Q9NQ78 | Kinesin-like protein KIF13B OS=Homo sapiens GN=KIF13B PE=1 SV=1 - [KIF13B_HUMAN]                           | 2.14  | 1 | 2  | 2  | 2    |      |      |      |      |      |      | 1.33 | 1.43 | 1.36 | 1.45 | 1826 | 202.5 | 5.78 |
| Q15058 | Kinesin-like protein KIF14 OS=Homo sapiens GN=KIF14 PE=1 SV=1 - [KIF14_HUMAN]                              | 0.97  | 1 | 1  | 1  | 2    | 1.55 | 2.00 | 1.63 | 2.12 | 1.38 | 1.21 | 1.14 | 1.00 |      |      | 1648 | 186.4 | 7.91 |
| Q9NS87 | Kinesin-like protein KIF15 OS=Homo sapiens GN=KIF15 PE=1 SV=1 - [KIF15_HUMAN]                              | 3.39  | 1 | 3  | 3  | 3    | 1.08 | 1.19 | 0.96 | 1.07 | 0.64 | 0.49 | 0.72 | 0.54 |      |      | 1388 | 160.1 | 6.00 |
| Q96L93 | Kinesin-like protein KIF16B OS=Homo sapiens GN=KIF16B PE=1 SV=2 - [KIF16B_HUMAN]                           | 4.48  | 1 | 4  | 4  | 6    | 1.08 | 0.95 | 1.05 | 0.87 | 1.43 | 1.64 | 1.22 | 1.40 |      |      | 1317 | 151.9 | 6.16 |
| Q8NI77 | Kinesin-like protein KIF18A OS=Homo sapiens GN=KIF18A PE=1 SV=2 - [KIF18A_HUMAN]                           | 1.56  | 1 | 1  | 1  | 4    |      |      |      |      |      |      | 0.99 | 0.95 | 1.08 | 0.99 | 898  | 102.2 | 8.91 |
| Q2TAC6 | Kinesin-like protein KIF19 OS=Homo sapiens GN=KIF19 PE=2 SV=2 - [KIF19_HUMAN]                              | 2.61  | 1 | 1  | 1  | 1    | 1.12 | 1.63 | 1.29 | 1.88 |      |      |      |      |      |      | 998  | 111.3 | 8.69 |
| O95235 | Kinesin-like protein KIF20A OS=Homo sapiens GN=KIF20A PE=1 SV=1 - [KIF20A_HUMAN]                           | 1.80  | 1 | 1  | 1  | 2    | 0.74 | 1.01 | 0.82 | 1.13 |      |      |      |      |      |      | 890  | 100.2 | 6.92 |
| Q96Q89 | Kinesin-like protein KIF20B OS=Homo sapiens GN=KIF20B PE=1 SV=3 - [KIF20B_HUMAN]                           | 1.70  | 7 | 1  | 4  | 142  | 0.98 | 0.83 | 1.05 | 0.89 |      |      |      |      |      |      | 1820 | 210.5 | 5.67 |
| Q7Z4S6 | Kinesin-like protein KIF21A OS=Homo sapiens GN=KIF21A PE=1 SV=2 - [KIF21A_HUMAN]                           | 0.60  | 1 | 1  | 1  | 2    | 0.98 | 1.10 | 0.99 | 1.11 |      |      |      |      |      |      | 1674 | 187.1 | 6.42 |
| O75037 | Kinesin-like protein KIF21B OS=Homo sapiens GN=KIF21B PE=1 SV=2 - [KIF21B_HUMAN]                           | 1.28  | 2 | 2  | 4  | 6    |      |      |      |      |      |      | 0.86 | 1.45 | 0.78 | 1.31 | 1637 | 182.5 | 7.08 |
| Q5T7B8 | Kinesin-like protein KIF24 OS=Homo sapiens GN=KIF24 PE=1 SV=2 - [KIF24_HUMAN]                              | 1.90  | 1 | 2  | 2  | 3    |      |      |      |      |      |      | 0.74 | 0.32 | 0.64 | 0.28 | 1368 | 151.8 | 7.14 |
| Q9UIL4 | Kinesin-like protein KIF25 OS=Homo sapiens GN=KIF25 PE=2 SV=2 - [KIF25_HUMAN]                              | 17.71 | 1 | 3  | 3  | 3    | 0.71 | 0.83 | 0.97 | 1.14 | 0.71 | 0.62 | 0.67 | 0.58 |      |      | 384  | 40.7  | 8.31 |
| Q9ULI4 | Kinesin-like protein KIF26A OS=Homo sapiens GN=KIF26A PE=1 SV=3 - [KIF26A_HUMAN]                           | 1.43  | 1 | 1  | 1  | 1    |      |      |      |      |      |      | 1.06 | 0.54 | 0.61 | 0.32 | 1882 | 194.5 | 8.81 |
| Q86VH2 | Kinesin-like protein KIF27 OS=Homo sapiens GN=KIF27 PE=2 SV=1 - [KIF27_HUMAN]                              | 2.36  | 1 | 3  | 3  | 9    | 0.96 | 0.83 | 1.10 | 0.95 | 1.16 | 1.32 | 1.03 | 1.18 |      |      | 1401 | 160.2 | 7.28 |
| O00139 | Kinesin-like protein KIF2A OS=Homo sapiens GN=KIF2A PE=1 SV=3 - [KIF2A_HUMAN]                              | 2.69  | 1 | 2  | 2  | 6    |      |      |      |      |      |      | #### | 9.38 | ###  | 8.93 | 706  | 79.9  | 6.68 |
| Q8N4N8 | Kinesin-like protein KIF2B OS=Homo sapiens GN=KIF2B PE=1 SV=3 - [KIF2B_HUMAN]                              | 2.97  | 1 | 1  | 1  | 1    |      |      |      |      |      |      | #### | ###  | ###  | #### | 673  | 76.2  | 8.65 |
| O14782 | Kinesin-like protein KIF3C OS=Homo sapiens GN=KIF3C PE=1 SV=3 - [KIF3C_HUMAN]                              | 9.71  | 1 | 4  | 4  | 4    | 1.05 | 1.16 | 1.12 | 1.24 | 1.03 | 0.84 | 1.25 | 1.00 |      |      | 793  | 89.4  | 8.22 |
| Q6ZMV9 | Kinesin-like protein KIF6 OS=Homo sapiens GN=KIF6 PE=1 SV=3 - [KIF6_HUMAN]                                 | 1.47  | 1 | 1  | 1  | 2    | 9.37 | 8.09 | 0.87 | 0.75 |      |      |      |      |      |      | 814  | 92.5  | 6.93 |
| Q9BW19 | Kinesin-like protein KIFC1 OS=Homo sapiens GN=KIFC1 PE=1 SV=2 - [KIFC1_HUMAN]                              | 5.20  | 1 | 1  | 2  | 2    | 1.15 | 1.01 | 1.55 | 1.36 |      |      |      |      |      |      | 673  | 73.7  | 8.98 |
| Q9BZD4 | Kinetochore protein Nuf2 OS=Homo sapiens GN=NUF2 PE=1 SV=2 - [NUF2_HUMAN]                                  | 7.97  | 1 | 4  | 4  | 5    | 0.88 | 0.83 | 0.68 | 0.64 | 0.70 | 0.53 | 0.80 | 0.60 |      |      | 464  | 54.3  | 8.27 |
| Q8NBT2 | Kinetochore protein Spc24 OS=Homo sapiens GN=SPC24 PE=1 SV=1 - [SPC24_HUMAN]                               | 13.20 | 1 | 1  | 1  | 1    |      |      |      |      |      |      | 0.81 | 0.88 | 1.01 | 1.09 | 197  | 22.4  | 4.70 |
| P01042 | Kininogen-1 OS=Homo sapiens GN=KNG1 PE=1 SV=2 - [KNG1_HUMAN]                                               | 51.09 | 1 | 41 | 41 | 1256 | 1.25 | 1.22 | 1.23 | 1.20 | 1.00 | 0.97 | 1.00 | 1.00 |      |      | 644  | 71.9  | 6.81 |
| Q14678 | KN motif and ankyrin repeat domain-containing protein 1 OS=Homo sapiens GN=KANK1 PE=1 SV=3 - [KANK1_HUMAN] | 5.55  | 1 | 2  | 2  | 5    |      |      |      |      |      |      | 0.84 | 0.89 | 0.91 | 0.96 | 1352 | 147.2 | 5.30 |

|        |                                                                                                                  |       |   |    |    |     |      |      |      |      |      |      |       |      |      |       |      |
|--------|------------------------------------------------------------------------------------------------------------------|-------|---|----|----|-----|------|------|------|------|------|------|-------|------|------|-------|------|
| Q63ZY3 | KN motif and ankyrin repeat domain-containing protein 2<br>OS=Homo sapiens GN=KANK2 PE=1 SV=1 -<br>[KANK2_HUMAN] | 1.41  | 1 | 1  | 1  | 1   |      | 1.04 | 1.08 | 1.00 | 1.04 | 851  | 91.1  | 5.63 |      |       |      |
| Q96MU8 | Kremen protein 1 OS=Homo sapiens GN=KREMEN1 PE=2<br>SV=3 - [KREM1_HUMAN]                                         | 1.69  | 1 | 1  | 1  | 1   | 0.73 | 0.78 | 0.68 | 0.73 |      | 473  | 51.7  | 7.11 |      |       |      |
| Q13601 | KRR1 small subunit processome component homolog<br>OS=Homo sapiens GN=KRR1 PE=1 SV=4 - [KRR1_HUMAN]              | 2.36  | 1 | 1  | 1  | 2   |      | 1.33 | 1.28 | 1.49 | 1.43 | 381  | 43.6  | 9.77 |      |       |      |
| Q9Y2Y9 | Kruppel-like factor 13 OS=Homo sapiens GN=KLF13 PE=1<br>SV=1 - [KLF13_HUMAN]                                     | 4.86  | 1 | 1  | 1  | 4   |      | 1.25 | 0.78 | 1.19 | 0.75 | 288  | 31.2  | 9.54 |      |       |      |
| O43278 | Kunitz-type protease inhibitor 1 OS=Homo sapiens<br>GN=SPINT1 PE=1 SV=2 - [SPIT1_HUMAN]                          | 1.32  | 1 | 1  | 1  | 1   | 1.87 | 1.76 | 2.10 | 2.00 |      | 529  | 58.4  | 6.29 |      |       |      |
| O43291 | Kunitz-type protease inhibitor 2 OS=Homo sapiens<br>GN=SPINT2 PE=1 SV=2 - [SPIT2_HUMAN]                          | 1.98  | 1 | 1  | 1  | 1   | 0.95 | 1.39 | 0.96 | 1.42 |      | 252  | 28.2  | 8.29 |      |       |      |
| Q9NZ12 | Kv channel-interacting protein 1 OS=Homo sapiens<br>GN=KCNI1 PE=1 SV=2 - [KCI1_HUMAN]                            | 6.17  | 1 | 1  | 1  | 2   | 0.95 | 1.03 | 4.49 | 4.95 |      | 227  | 26.8  | 5.26 |      |       |      |
| Q9NS61 | Kv channel-interacting protein 2 OS=Homo sapiens<br>GN=KCNI2 PE=1 SV=3 - [KCI2_HUMAN]                            | 3.33  | 1 | 1  | 1  | 1   | 1.17 | 1.55 | 0.88 | 1.18 |      | 270  | 30.9  | 5.11 |      |       |      |
| Q6PIL6 | Kv channel-interacting protein 4 OS=Homo sapiens<br>GN=KCNI4 PE=1 SV=1 - [KCI4_HUMAN]                            | 3.60  | 1 | 1  | 1  | 1   | 0.66 | 1.36 | 0.75 | 1.54 |      | 250  | 28.7  | 5.21 |      |       |      |
| Q8N0W3 | L-fucose kinase OS=Homo sapiens GN=FUK PE=2 SV=2 -<br>[FUK_HUMAN]                                                | 0.92  | 1 | 1  | 1  | 7   |      | 0.80 | 0.84 | 0.91 | 0.94 | 1084 | 117.5 | 6.25 |      |       |      |
| P00338 | L-lactate dehydrogenase A chain OS=Homo sapiens<br>GN=LDHA PE=1 SV=2 - [LDHA_HUMAN]                              | 17.17 | 3 | 5  | 6  | 16  | 1.05 | 1.11 | 1.06 | 1.13 | 0.59 | 0.58 | 0.86  | 0.75 | 332  | 36.7  | 8.27 |
| P07195 | L-lactate dehydrogenase B chain OS=Homo sapiens<br>GN=LDHB PE=1 SV=2 - [LDHB_HUMAN]                              | 33.53 | 3 | 10 | 11 | 40  | 0.94 | 0.95 | 0.98 | 0.96 | 0.99 | 0.85 | 1.11  | 0.95 | 334  | 36.6  | 6.05 |
| P14151 | L-selectin OS=Homo sapiens GN=SELL PE=1 SV=2 -<br>[LYAM1_HUMAN]                                                  | 12.10 | 1 | 5  | 5  | 31  | 1.29 | 1.21 | 1.15 | 1.09 | 0.99 | 1.06 | 0.95  | 0.98 | 372  | 42.2  | 6.60 |
| Q8IV42 | L-seryl-tRNA(Sec) kinase OS=Homo sapiens GN=PSTK PE=2<br>SV=2 - [PSTK_HUMAN]                                     | 2.59  | 1 | 1  | 1  | 2   |      | 0.61 | 0.68 | 0.61 | 0.68 | 348  | 39.5  | 8.28 |      |       |      |
| Q6PKG0 | La-related protein 1 OS=Homo sapiens GN=LARP1 PE=1<br>SV=2 - [LARP1_HUMAN]                                       | 1.09  | 1 | 1  | 1  | 7   | 1.12 | 0.90 | 1.23 | 0.99 | 1.01 | 1.05 | 1.09  | 1.14 | 1096 | 123.4 | 8.82 |
| Q659C4 | La-related protein 1B OS=Homo sapiens GN=LARP1B PE=1<br>SV=2 - [LAR1B_HUMAN]                                     | 2.74  | 1 | 1  | 1  | 2   | 0.92 | 0.55 | 0.92 | 0.55 |      | 914  | 105.3 | 7.61 |      |       |      |
| Q4G0J3 | La-related protein 7 OS=Homo sapiens GN=LARP7 PE=1<br>SV=1 - [LARP7_HUMAN]                                       | 3.09  | 1 | 1  | 1  | 2   | 1.15 | 1.35 | 1.23 | 1.45 |      | 582  | 66.9  | 9.55 |      |       |      |
| Q8WV93 | Lactation elevated protein 1 OS=Homo sapiens GN=LACE1<br>PE=2 SV=2 - [LACE1_HUMAN]                               | 2.49  | 1 | 1  | 1  | 1   | 1.47 | 1.79 | 1.38 | 1.69 |      | 481  | 54.8  | 7.27 |      |       |      |
| P22079 | Lactoperoxidase OS=Homo sapiens GN=LPO PE=1 SV=2 -<br>[PERL_HUMAN]                                               | 1.54  | 1 | 1  | 1  | 1   |      | 0.26 | 0.62 | 2.88 | 6.90 | 712  | 80.2  | 8.62 |      |       |      |
| P02788 | Lactotransferrin OS=Homo sapiens GN=LTF PE=1 SV=6 -<br>[TRFL_HUMAN]                                              | 58.31 | 4 | 39 | 40 | 292 | 1.26 | 1.24 | 1.27 | 1.23 | 1.12 | 1.24 | 1.05  | 1.09 | 710  | 78.1  | 8.12 |
| O00515 | Ladinin-1 OS=Homo sapiens GN=LAD1 PE=1 SV=2 -<br>[LAD1_HUMAN]                                                    | 1.74  | 1 | 1  | 1  | 6   |      | 0.62 | 0.63 | 1.26 | 1.28 | 517  | 57.1  | 9.67 |      |       |      |
| P24043 | Laminin subunit alpha-2 OS=Homo sapiens GN=LAMA2 PE=1<br>SV=4 - [LAMA2_HUMAN]                                    | 5.61  | 1 | 8  | 8  | 11  | 0.87 | 0.85 | 0.75 | 0.72 | 0.50 | 0.62 | 0.57  | 0.71 | 3122 | 343.7 | 6.40 |
| Q16787 | Laminin subunit alpha-3 OS=Homo sapiens GN=LAMA3 PE=1<br>SV=2 - [LAMA3_HUMAN]                                    | 1.59  | 1 | 2  | 3  | 3   | 0.88 | 1.03 | 0.86 | 1.02 | 0.80 | 0.51 | 1.11  | 0.71 | 3333 | 366.4 | 7.24 |
| Q16363 | Laminin subunit alpha-4 OS=Homo sapiens GN=LAMA4 PE=1<br>SV=4 - [LAMA4_HUMAN]                                    | 0.88  | 1 | 1  | 1  | 4   | 1.07 | 0.95 | 1.22 | 1.10 | 0.67 | 0.37 | 0.79  | 0.44 | 1823 | 202.4 | 6.28 |
| O15230 | Laminin subunit alpha-5 OS=Homo sapiens GN=LAMA5 PE=1<br>SV=8 - [LAMA5_HUMAN]                                    | 0.43  | 1 | 1  | 1  | 6   |      | 0.96 | 0.75 | 1.01 | 0.79 | 3695 | 399.5 | 7.02 |      |       |      |
| P07942 | Laminin subunit beta-1 OS=Homo sapiens GN=LAMB1 PE=1<br>SV=2 - [LAMB1_HUMAN]                                     | 9.57  | 1 | 12 | 12 | 29  | 1.05 | 1.07 | 1.10 | 1.06 |      | 1786 | 197.9 | 4.94 |      |       |      |
| P55268 | Laminin subunit beta-2 OS=Homo sapiens GN=LAMB2 PE=1<br>SV=2 - [LAMB2_HUMAN]                                     | 0.95  | 1 | 2  | 2  | 2   | 1.01 | 0.86 | 1.01 | 0.87 | 0.99 | 0.90 | 1.07  | 0.97 | 1798 | 195.9 | 6.52 |

|        |                                                                                                                 |       |   |    |    |     |      |      |      |      |      |      |      |      |      |       |      |      |      |      |      |      |       |      |
|--------|-----------------------------------------------------------------------------------------------------------------|-------|---|----|----|-----|------|------|------|------|------|------|------|------|------|-------|------|------|------|------|------|------|-------|------|
| Q13751 | Laminin subunit beta-3 OS=Homo sapiens GN=LAMB3 PE=1 SV=1 - [LAMB3_HUMAN]                                       | 1.02  | 1 | 1  | 1  | 1   |      |      |      |      |      |      |      |      |      |       |      | 0.28 | 4.47 | 0.42 | 6.59 | 1172 | 129.5 | 7.21 |
| P11047 | Laminin subunit gamma-1 OS=Homo sapiens GN=LAMC1 PE=1 SV=3 - [LAMC1_HUMAN]                                      | 2.73  | 1 | 3  | 3  | 4   | 0.97 | 0.94 | 1.02 | 0.99 |      |      |      |      |      |       |      |      |      |      |      | 1609 | 177.5 | 5.12 |
| Q9Y6N6 | Laminin subunit gamma-3 OS=Homo sapiens GN=LAMC3 PE=1 SV=3 - [LAMC3_HUMAN]                                      | 1.33  | 1 | 1  | 1  | 1   | 0.94 | 1.08 | 0.92 | 1.06 |      |      |      |      |      |       |      |      |      |      |      | 1575 | 171.1 | 6.58 |
| Q01650 | Large neutral amino acids transporter small subunit 1 OS=Homo sapiens GN=SLC7A5 PE=1 SV=2 - [LAT1_HUMAN]        | 1.78  | 1 | 1  | 1  | 2   | 0.88 | 0.82 | 1.02 | 0.95 | 0.87 | 0.64 | 0.82 | 0.61 | 507  | 55.0  | 7.72 |      |      |      |      |      |       |      |
| P46379 | Large proline-rich protein BAG6 OS=Homo sapiens GN=BAG6 PE=1 SV=2 - [BAG6_HUMAN]                                | 1.59  | 1 | 2  | 2  | 3   | 2.20 | 2.49 | 2.23 | 2.55 | 1.62 | 1.70 | 2.56 | 2.68 | 1132 | 119.3 | 5.60 |      |      |      |      |      |       |      |
| Q14766 | Latent-transforming growth factor beta-binding protein 1 OS=Homo sapiens GN=LTBP1 PE=1 SV=4 - [LTBP1_HUMAN]     | 14.41 | 1 | 18 | 19 | 53  | 1.02 | 0.95 | 1.02 | 0.97 | 1.03 | 0.95 | 1.12 | 0.99 | 1721 | 186.7 | 5.96 |      |      |      |      |      |       |      |
| Q9NS15 | Latent-transforming growth factor beta-binding protein 3 OS=Homo sapiens GN=LTBP3 PE=1 SV=4 - [LTBP3_HUMAN]     | 4.60  | 1 | 2  | 3  | 4   |      |      |      |      | 1.37 | 1.06 | 1.22 | 0.95 | 1303 | 139.3 | 6.07 |      |      |      |      |      |       |      |
| Q9HCC9 | Lateral signaling target protein 2 homolog OS=Homo sapiens GN=ZFYVE28 PE=1 SV=3 - [LST2_HUMAN]                  | 5.86  | 1 | 2  | 2  | 2   |      |      |      |      | 1.60 | 1.67 |      |      | 887  | 96.4  | 5.11 |      |      |      |      |      |       |      |
| Q9BS40 | Latexin OS=Homo sapiens GN=LXN PE=1 SV=2 - [LXN_HUMAN]                                                          | 18.92 | 1 | 2  | 2  | 3   | 1.04 | 1.08 | 1.28 | 1.34 |      |      |      |      | 222  | 25.7  | 5.78 |      |      |      |      |      |       |      |
| O95490 | Latrophilin-2 OS=Homo sapiens GN=LPHN2 PE=1 SV=2 - [LPHN2_HUMAN]                                                | 2.74  | 1 | 2  | 2  | 2   |      |      |      |      | 0.98 | 0.65 | 1.22 | 0.81 | 1459 | 163.2 | 6.43 |      |      |      |      |      |       |      |
| Q9HAR2 | Latrophilin-3 OS=Homo sapiens GN=LPHN3 PE=1 SV=2 - [LPHN3_HUMAN]                                                | 1.31  | 1 | 1  | 1  | 5   | 0.97 | 0.87 | 0.98 | 0.89 |      |      |      |      | 1447 | 161.7 | 6.44 |      |      |      |      |      |       |      |
| Q9H400 | Lck-interacting transmembrane adapter 1 OS=Homo sapiens GN=LIME1 PE=1 SV=1 - [LIME1_HUMAN]                      | 5.76  | 1 | 1  | 1  | 1   | 0.86 | 0.81 | 0.97 | 0.91 |      |      |      |      | 295  | 31.3  | 9.58 |      |      |      |      |      |       |      |
| Q14696 | LDLR chaperone MESD OS=Homo sapiens GN=MESDC2 PE=1 SV=2 - [MESD_HUMAN]                                          | 12.82 | 1 | 3  | 3  | 10  |      |      |      |      | 1.18 | 1.31 | 1.39 | 1.34 | 234  | 26.1  | 7.78 |      |      |      |      |      |       |      |
| Q86VQ0 | Lebercilin OS=Homo sapiens GN=LCA5 PE=1 SV=2 - [LCA5_HUMAN]                                                     | 4.88  | 1 | 2  | 2  | 2   | 1.39 | 1.35 | 1.50 | 1.45 | 1.73 | 1.30 | 1.56 | 1.17 | 697  | 80.5  | 7.68 |      |      |      |      |      |       |      |
| O95447 | Lebercilin-like protein OS=Homo sapiens GN=LCA5L PE=2 SV=1 - [LCA5L_HUMAN]                                      | 3.28  | 1 | 2  | 2  | 2   |      |      |      |      | 1.37 | 1.43 | 3.48 | 4.08 | 670  | 76.5  | 9.48 |      |      |      |      |      |       |      |
| Q96KR4 | Leishmanolysin-like peptidase OS=Homo sapiens GN=LMLN PE=2 SV=2 - [LMLN_HUMAN]                                  | 1.53  | 1 | 1  | 1  | 1   |      |      |      |      | 1.00 | 1.12 | 0.86 | 0.97 | 655  | 73.5  | 6.93 |      |      |      |      |      |       |      |
| P41159 | Leptin OS=Homo sapiens GN=LEP PE=1 SV=1 - [LEP_HUMAN]                                                           | 24.55 | 1 | 3  | 3  | 8   |      |      |      |      | 0.93 | 0.81 | 0.99 | 0.86 | 167  | 18.6  | 6.37 |      |      |      |      |      |       |      |
| P48357 | Leptin receptor OS=Homo sapiens GN=LEPR PE=1 SV=2 - [LEPR_HUMAN]                                                | 2.75  | 1 | 2  | 2  | 3   |      |      |      |      | 1.38 | 0.86 | 1.98 | 1.22 | 1165 | 132.4 | 6.52 |      |      |      |      |      |       |      |
| Q9Y468 | Lethal(3)malignant brain tumor-like protein 1 OS=Homo sapiens GN=L3MBTL1 PE=1 SV=3 - [LMBL1_HUMAN]              | 1.20  | 1 | 1  | 1  | 1   |      |      |      |      | 0.25 | 0.24 | 1.24 | 1.18 | 752  | 83.8  | 5.95 |      |      |      |      |      |       |      |
| Q96JM7 | Lethal(3)malignant brain tumor-like protein 3 OS=Homo sapiens GN=L3MBTL3 PE=1 SV=2 - [LMBL3_HUMAN]              | 3.33  | 1 | 1  | 2  | 2   | 1.56 | 1.35 | 1.72 | 1.49 |      |      |      |      | 780  | 88.3  | 6.46 |      |      |      |      |      |       |      |
| Q8NA19 | Lethal(3)malignant brain tumor-like protein 4 OS=Homo sapiens GN=L3MBTL4 PE=2 SV=2 - [LMBL4_HUMAN]              | 3.85  | 1 | 1  | 1  | 1   | 1.16 | 1.25 | 1.23 | 1.33 |      |      |      |      | 623  | 71.1  | 7.43 |      |      |      |      |      |       |      |
| O95202 | LETM1 and EF-hand domain-containing protein 1, mitochondrial OS=Homo sapiens GN=LETM1 PE=1 SV=1 - [LETM1_HUMAN] | 7.04  | 1 | 3  | 3  | 3   | 1.31 | 1.46 | 1.12 | 1.22 |      |      |      |      | 739  | 83.3  | 6.70 |      |      |      |      |      |       |      |
| Q2VYF4 | LETM1 domain-containing protein LETM2, mitochondrial OS=Homo sapiens GN=LETM2 PE=2 SV=2 - [LETM2_HUMAN]         | 2.85  | 1 | 1  | 1  | 1   | 1.08 | 0.99 | 0.94 | 0.87 |      |      |      |      | 491  | 55.9  | 9.23 |      |      |      |      |      |       |      |
| O60294 | Leucine carboxyl methyltransferase 2 OS=Homo sapiens GN=LCMT2 PE=1 SV=3 - [LCMT2_HUMAN]                         | 2.19  | 1 | 1  | 1  | 2   | 1.12 | 1.41 | 1.12 | 1.41 |      |      |      |      | 686  | 75.6  | 6.73 |      |      |      |      |      |       |      |
| Q86V48 | Leucine zipper protein 1 OS=Homo sapiens GN=LUZP1 PE=1 SV=2 - [LUZP1_HUMAN]                                     | 3.81  | 1 | 2  | 2  | 2   | 1.14 | 1.06 | 1.46 | 1.35 |      |      |      |      | 1076 | 120.2 | 8.50 |      |      |      |      |      |       |      |
| Q9P127 | Leucine zipper protein 4 OS=Homo sapiens GN=LUZP4 PE=2 SV=1 - [LUZP4_HUMAN]                                     | 3.19  | 1 | 1  | 1  | 1   |      |      |      |      | 0.72 | 0.72 | 0.64 | 0.64 | 313  | 35.9  | 9.45 |      |      |      |      |      |       |      |
| P02750 | Leucine-rich alpha-2-glycoprotein OS=Homo sapiens GN=LRG1 PE=1 SV=2 - [A2GL_HUMAN]                              | 57.06 | 2 | 16 | 17 | 421 | 1.08 | 1.05 | 1.07 | 1.00 | 0.81 | 0.83 | 0.83 | 0.84 | 347  | 38.2  | 6.95 |      |      |      |      |      |       |      |

|        |                                                                                                                             |      |   |   |   |    |      |      |      |      |      |      |      |       |      |       |      |
|--------|-----------------------------------------------------------------------------------------------------------------------------|------|---|---|---|----|------|------|------|------|------|------|------|-------|------|-------|------|
| Q9P244 | Leucine-rich repeat and fibronectin type III domain-containing protein 1 OS=Homo sapiens GN=LRFN1 PE=1 SV=2 - [LRFN1_HUMAN] | 3.24 | 1 | 1 | 1 | 1  | 0.84 | 0.85 | 0.81 | 0.82 |      | 771  | 82.3 | 7.05  |      |       |      |
| Q9ULH4 | Leucine-rich repeat and fibronectin type-III domain-containing protein 2 OS=Homo sapiens GN=LRFN2 PE=1 SV=2 - [LRFN2_HUMAN] | 3.93 | 1 | 2 | 2 | 2  | 1.27 | 0.98 | 1.15 | 0.88 | 0.78 | 0.65 | 0.84 | 0.71  | 789  | 84.7  | 6.74 |
| Q6PJG9 | Leucine-rich repeat and fibronectin type-III domain-containing protein 4 OS=Homo sapiens GN=LRFN4 PE=1 SV=1 - [LRFN4_HUMAN] | 0.94 | 1 | 1 | 1 | 1  |      |      |      |      | 2.25 | 1.55 | 0.93 | 0.64  | 635  | 66.8  | 6.92 |
| Q96M69 | Leucine-rich repeat and guanylate kinase domain-containing protein OS=Homo sapiens GN=LRGUK PE=1 SV=1 - [LRGUK_HUMAN]       | 2.06 | 1 | 2 | 2 | 3  | 0.95 | 0.88 | 0.88 | 0.82 | 0.67 | 0.86 | 0.87 | 1.12  | 825  | 93.6  | 6.43 |
| Q96JM4 | Leucine-rich repeat and IQ domain-containing protein 1 OS=Homo sapiens GN=LRRIQ1 PE=2 SV=3 - [LRIQ1_HUMAN]                  | 0.99 | 9 | 1 | 2 | 2  |      |      |      |      | 1.39 | 1.38 | 1.44 | 1.43  | 1722 | 199.2 | 6.19 |
| Q9HBL6 | Leucine-rich repeat and transmembrane domain-containing protein 1 OS=Homo sapiens GN=LRTM1 PE=1 SV=1 - [LRTM1_HUMAN]        | 3.19 | 9 | 1 | 2 | 2  |      |      |      |      | 0.56 | 0.47 | 1.14 | 0.95  | 345  | 38.1  | 6.74 |
| Q9ULI1 | Leucine-rich repeat and WD repeat-containing protein KIAA1239 OS=Homo sapiens GN=KIAA1239 PE=2 SV=3 - [K1239_HUMAN]         | 0.98 | 1 | 1 | 1 | 1  | 4.81 | 5.30 | 4.54 | 5.06 |      |      |      |       | 1742 | 197.3 | 6.24 |
| Q32MZ4 | Leucine-rich repeat flightless-interacting protein 1 OS=Homo sapiens GN=LRRFIP1 PE=1 SV=2 - [LRRF1_HUMAN]                   | 8.79 | 1 | 3 | 5 | 9  |      |      |      |      | 1.00 | 0.99 | 1.08 | 1.02  | 808  | 89.2  | 4.65 |
| Q9Y608 | Leucine-rich repeat flightless-interacting protein 2 OS=Homo sapiens GN=LRRFIP2 PE=1 SV=1 - [LRRF2_HUMAN]                   | 3.61 | 1 | 1 | 2 | 4  |      |      |      |      | 1.44 | 1.49 | 1.41 | 1.46  | 721  | 82.1  | 6.95 |
| Q6UXK5 | Leucine-rich repeat neuronal protein 1 OS=Homo sapiens GN=LRRN1 PE=1 SV=1 - [LRRN1_HUMAN]                                   | 2.93 | 1 | 1 | 1 | 1  |      |      |      |      | 0.70 | 0.58 | 0.99 | 0.82  | 716  | 80.7  | 6.15 |
| Q9H3W5 | Leucine-rich repeat neuronal protein 3 OS=Homo sapiens GN=LRRN3 PE=2 SV=1 - [LRRN3_HUMAN]                                   | 3.25 | 1 | 2 | 2 | 4  | 0.97 | 0.92 | 0.97 | 0.92 |      |      |      |       | 708  | 79.4  | 7.83 |
| Q8WUT4 | Leucine-rich repeat neuronal protein 4 OS=Homo sapiens GN=LRRN4 PE=1 SV=3 - [LRRN4_HUMAN]                                   | 4.59 | 1 | 1 | 1 | 2  | 0.97 | 1.56 | 1.19 | 1.91 |      |      |      |       | 740  | 78.8  | 7.20 |
| Q96L50 | Leucine-rich repeat protein 1 OS=Homo sapiens GN=LRR1 PE=1 SV=2 - [LLR1_HUMAN]                                              | 1.45 | 1 | 1 | 1 | 1  | 0.72 | 1.04 | 0.63 | 0.91 |      |      |      |       | 414  | 46.7  | 9.09 |
| Q38SD2 | Leucine-rich repeat serine/threonine-protein kinase 1 OS=Homo sapiens GN=LRRK1 PE=1 SV=3 - [LRRK1_HUMAN]                    | 1.74 | 1 | 2 | 2 | 3  | 0.77 | 1.01 | 0.72 | 0.96 | 2.25 | 1.94 | 2.14 | 1.84  | 2015 | 225.2 | 6.68 |
| Q86VH5 | Leucine-rich repeat transmembrane neuronal protein 3 OS=Homo sapiens GN=LRRTM3 PE=2 SV=2 - [LRRTM3_HUMAN]                   | 6.88 | 1 | 2 | 2 | 2  | 0.49 | 0.53 | 0.41 | 0.44 |      |      |      |       | 581  | 65.9  | 9.13 |
| Q9NZU1 | Leucine-rich repeat transmembrane protein FLRT1 OS=Homo sapiens GN=FLRT1 PE=1 SV=3 - [FLRT1_HUMAN]                          | 1.86 | 1 | 1 | 1 | 2  |      |      |      |      | 1.73 | 1.83 | 646  | 71.3  | 6.38 |       |      |
| Q9HBX8 | Leucine-rich repeat-containing G-protein coupled receptor 6 OS=Homo sapiens GN=LGR6 PE=1 SV=3 - [LGR6_HUMAN]                | 2.90 | 1 | 1 | 1 | 1  |      |      |      |      | 0.52 | 0.36 | 0.95 | 0.66  | 967  | 104.2 | 5.72 |
| Q9BTT6 | Leucine-rich repeat-containing protein 1 OS=Homo sapiens GN=LRRC1 PE=1 SV=1 - [LRRC1_HUMAN]                                 | 6.11 | 8 | 2 | 3 | 4  |      |      |      |      | 2.01 | 0.13 |      |       | 524  | 59.2  | 5.02 |
| Q5BKY1 | Leucine-rich repeat-containing protein 10 OS=Homo sapiens GN=LRRC10 PE=2 SV=1 - [LRC10_HUMAN]                               | 9.03 | 1 | 1 | 1 | 1  | 0.65 | 0.79 | 0.71 | 0.87 |      |      |      |       | 277  | 31.6  | 8.47 |
| Q5VZK9 | Leucine-rich repeat-containing protein 16A OS=Homo sapiens GN=LRRC16A PE=1 SV=1 - [LR16A_HUMAN]                             | 1.31 | 1 | 1 | 1 | 1  |      |      |      |      | 1.32 | 1.06 | 1.22 | 0.98  | 1371 | 151.5 | 7.85 |
| Q6F5E8 | Leucine-rich repeat-containing protein 16C OS=Homo sapiens GN=RLTPR PE=1 SV=2 - [LR16C_HUMAN]                               | 1.11 | 1 | 2 | 2 | 4  |      |      |      |      | 1.22 | 0.95 | 1.29 | 1.00  | 1435 | 154.6 | 6.76 |
| Q9C0I9 | Leucine-rich repeat-containing protein 27 OS=Homo sapiens GN=LRRC27 PE=2 SV=2 - [LRC27_HUMAN]                               | 3.77 | 1 | 1 | 1 | 1  | 0.69 | 0.85 | 0.69 | 0.86 |      |      |      |       | 530  | 60.1  | 9.60 |
| A6NM36 | Leucine-rich repeat-containing protein 30 OS=Homo sapiens GN=LRRC30 PE=2 SV=1 - [LRC30_HUMAN]                               | 6.31 | 1 | 1 | 1 | 48 | 1.00 | 0.93 | 1.09 | 1.00 | 0.95 | 1.14 | 0.99 | 1.19  | 301  | 34.0  | 9.33 |
| Q86YC3 | Leucine-rich repeat-containing protein 33 OS=Homo sapiens GN=LRRC33 PE=2 SV=1 - [LRC33_HUMAN]                               | 3.32 | 1 | 1 | 1 | 1  | 0.98 | 0.87 | 1.01 | 0.90 |      |      |      |       | 692  | 76.3  | 6.16 |
| O60309 | Leucine-rich repeat-containing protein 37A3 OS=Homo sapiens GN=LRRC37A3 PE=2 SV=2 - [L37A3_HUMAN]                           | 2.51 | 1 | 2 | 2 | 2  | 0.77 | 0.90 | 0.84 | 0.98 | 0.69 | 0.62 | 1634 | 180.5 | 5.31 |       |      |
| Q15345 | Leucine-rich repeat-containing protein 41 OS=Homo sapiens GN=LRRC41 PE=1 SV=3 - [LRC41_HUMAN]                               | 2.09 | 1 | 1 | 1 | 1  |      |      |      |      | 1.11 | 1.04 | 1.11 | 1.03  | 812  | 88.6  | 8.38 |
| Q9Y546 | Leucine-rich repeat-containing protein 42 OS=Homo sapiens GN=LRRC42 PE=1 SV=1 - [LRC42_HUMAN]                               | 3.04 | 1 | 1 | 1 | 1  | 0.87 | 0.86 | 0.81 | 0.81 |      |      |      |       | 428  | 48.5  | 7.46 |



|        |                                                                                                                    |       |   |    |    |    |      |      |      |      |      |      |       |      |     |      |      |
|--------|--------------------------------------------------------------------------------------------------------------------|-------|---|----|----|----|------|------|------|------|------|------|-------|------|-----|------|------|
| Q8N309 | Leucine-rich repeat-containing protein 43 OS=Homo sapiens<br>GN=LRRC43 PE=2 SV=2 - [LRC43_HUMAN]                   | 2.74  | 1 | 1  | 1  | 1  |      | 0.85 | 1.02 | 0.98 | 1.19 | 656  | 73.0  | 5.24 |     |      |      |
| Q8N1G4 | Leucine-rich repeat-containing protein 47 OS=Homo sapiens<br>GN=LRRC47 PE=1 SV=1 - [LRC47_HUMAN]                   | 3.26  | 1 | 1  | 1  | 1  | 0.94 | 0.64 | 0.84 | 0.57 |      | 583  | 63.4  | 8.28 |     |      |      |
| Q9NT99 | Leucine-rich repeat-containing protein 4B OS=Homo sapiens<br>GN=LRRC4B PE=1 SV=3 - [LRC4B_HUMAN]                   | 1.68  | 1 | 1  | 1  | 3  | 1.02 | 1.09 | 0.87 | 0.94 |      | 713  | 76.4  | 7.23 |     |      |      |
| Q8N9N7 | Leucine-rich repeat-containing protein 57 OS=Homo sapiens<br>GN=LRRC57 PE=1 SV=1 - [LRC57_HUMAN]                   | 14.23 | 1 | 1  | 1  | 3  | 1.04 | 1.26 | 0.97 | 1.18 |      | 239  | 26.7  | 8.43 |     |      |      |
| Q68CR7 | Leucine-rich repeat-containing protein 66 OS=Homo sapiens<br>GN=LRRC66 PE=2 SV=1 - [LRC66_HUMAN]                   | 6.59  | 1 | 2  | 2  | 13 |      | 0.86 | 0.81 | 0.93 | 0.88 | 880  | 97.7  | 6.46 |     |      |      |
| Q6ZQ3  | Leucine-rich repeat-containing protein 69 OS=Homo sapiens<br>GN=LRRC69 PE=2 SV=2 - [LRC69_HUMAN]                   | 15.56 | 1 | 2  | 2  | 29 | 0.80 | 0.91 | 0.90 | 1.04 | 1.27 | 0.96 | 1.01  | 0.81 | 347 | 39.6 | 8.57 |
| Q96NW7 | Leucine-rich repeat-containing protein 7 OS=Homo sapiens<br>GN=LRRC7 PE=1 SV=1 - [LRC7_HUMAN]                      | 1.95  | 1 | 2  | 2  | 2  | 0.97 | 1.10 | 0.99 | 1.12 |      | 1537 | 172.5 | 6.81 |     |      |      |
| Q7Z2Q7 | Leucine-rich repeat-containing protein 70 OS=Homo sapiens<br>GN=LRRC70 PE=2 SV=1 - [LRC70_HUMAN]                   | 4.50  | 1 | 2  | 2  | 2  | 0.88 | 0.87 | 0.96 | 0.96 | 0.99 | 1.10 | 3.20  | 3.55 | 622 | 70.3 | 8.76 |
| Q8TDW0 | Leucine-rich repeat-containing protein 8C OS=Homo sapiens<br>GN=LRRC8C PE=1 SV=2 - [LRC8C_HUMAN]                   | 2.24  | 1 | 1  | 1  | 1  |      | 0.67 | 0.28 | 1.20 | 0.51 | 803  | 92.4  | 7.62 |     |      |      |
| Q7L1W4 | Leucine-rich repeat-containing protein 8D OS=Homo sapiens<br>GN=LRRC8D PE=1 SV=1 - [LRC8D_HUMAN]                   | 2.68  | 2 | 2  | 2  | 2  | 0.98 | 1.05 | 0.80 | 0.86 |      | 858  | 98.1  | 7.72 |     |      |      |
| Q6NSJ5 | Leucine-rich repeat-containing protein 8E OS=Homo sapiens<br>GN=LRRC8E PE=2 SV=2 - [LRC8E_HUMAN]                   | 1.88  | 1 | 1  | 1  | 2  | 0.91 | 0.72 | 1.01 | 0.81 | 1.37 | 0.95 | 1.05  | 0.73 | 796 | 90.2 | 6.96 |
| Q6ZRR7 | Leucine-rich repeat-containing protein 9 OS=Homo sapiens<br>GN=LRRC9 PE=2 SV=2 - [LRC9_HUMAN]                      | 1.51  | 1 | 2  | 2  | 2  |      | 0.40 | 0.44 | 0.89 | 0.97 | 1453 | 166.8 | 7.65 |     |      |      |
| O94898 | Leucine-rich repeats and immunoglobulin-like domains protein<br>2 OS=Homo sapiens GN=LRI2 PE=1 SV=3 - [LRI2_HUMAN] | 3.19  | 1 | 2  | 2  | 3  | 0.70 | 0.74 | 0.67 | 0.71 |      | 1065 | 118.9 | 5.55 |     |      |      |
| Q6UXM1 | Leucine-rich repeats and immunoglobulin-like domains protein<br>3 OS=Homo sapiens GN=LRI3 PE=2 SV=1 - [LRI3_HUMAN] | 3.93  | 1 | 3  | 3  | 4  |      | 0.89 | 0.91 | 0.98 | 0.70 | 1119 | 123.4 | 6.19 |     |      |      |
| Q8N653 | Leucine-zipper-like transcriptional regulator 1 OS=Homo sapiens<br>GN=LZTR1 PE=2 SV=2 - [LZTR1_HUMAN]              | 5.83  | 1 | 3  | 3  | 3  |      | 1.14 | 1.28 | 0.96 | 1.07 | 840  | 94.7  | 6.57 |     |      |      |
| Q9UIQ6 | Leucyl-cystinyl aminopeptidase OS=Homo sapiens<br>GN=LNPEP PE=1 SV=3 - [LCAP_HUMAN]                                | 0.88  | 1 | 1  | 1  | 1  | 4.27 | 3.38 | 4.15 | 3.30 |      | 1025 | 117.3 | 5.73 |     |      |      |
| O75829 | Leukocyte cell-derived chemotaxin 1 OS=Homo sapiens<br>GN=LECT1 PE=2 SV=1 - [LECT1_HUMAN]                          | 5.99  | 1 | 2  | 2  | 4  |      | 1.64 | 2.04 | 0.99 | 1.43 | 334  | 37.1  | 7.56 |     |      |      |
| O14960 | Leukocyte cell-derived chemotaxin-2 OS=Homo sapiens<br>GN=LECT2 PE=1 SV=2 - [LECT2_HUMAN]                          | 5.96  | 1 | 1  | 1  | 4  |      | 1.05 | 1.21 | 1.10 | 1.26 | 151  | 16.4  | 9.39 |     |      |      |
| P30740 | Leukocyte elastase inhibitor OS=Homo sapiens<br>GN=SERPINB1 PE=1 SV=1 - [LEU_HUMAN]                                | 30.61 | 1 | 10 | 10 | 23 | 0.96 | 0.97 | 0.99 | 1.00 | 0.92 | 0.98 | 0.92  | 1.02 | 379 | 42.7 | 6.28 |
| Q8N149 | Leukocyte immunoglobulin-like receptor subfamily A member 2<br>OS=Homo sapiens GN=LILRA2 PE=1 SV=2 - [LIRA2_HUMAN] | 2.28  | 1 | 1  | 1  | 1  | 1.13 | 1.02 | 1.13 | 1.03 |      | 483  | 53.0  | 6.92 |     |      |      |
| Q8N6C8 | Leukocyte immunoglobulin-like receptor subfamily A member 3<br>OS=Homo sapiens GN=LILRA3 PE=1 SV=3 - [LIRA3_HUMAN] | 8.20  | 2 | 3  | 3  | 7  | 0.83 | 0.76 | 0.82 | 0.78 | 0.42 | 0.45 | 0.41  | 0.44 | 439 | 47.4 | 8.09 |
| A6NI73 | Leukocyte immunoglobulin-like receptor subfamily A member 5<br>OS=Homo sapiens GN=LILRA5 PE=1 SV=1 - [LIRA5_HUMAN] | 10.37 | 1 | 1  | 1  | 3  |      | 1.09 | 1.32 | 1.13 | 1.46 | 299  | 32.7  | 6.99 |     |      |      |
| O75023 | Leukocyte immunoglobulin-like receptor subfamily B member 5<br>OS=Homo sapiens GN=LILRB5 PE=1 SV=1 - [LIRB5_HUMAN] | 3.90  | 1 | 2  | 2  | 4  | 0.87 | 0.92 | 0.92 | 0.99 |      | 590  | 64.1  | 7.30 |     |      |      |
| Q08722 | Leukocyte surface antigen CD47 OS=Homo sapiens<br>GN=CD47 PE=1 SV=1 - [CD47_HUMAN]                                 | 2.79  | 1 | 1  | 1  | 1  |      | 0.77 | 0.15 | 0.96 | 0.19 | 323  | 35.2  | 7.21 |     |      |      |
| P29376 | Leukocyte tyrosine kinase receptor OS=Homo sapiens<br>GN=LTK PE=1 SV=3 - [LTK_HUMAN]                               | 1.85  | 1 | 1  | 1  | 1  |      | 0.47 | 1.02 | 0.56 | 1.22 | 864  | 91.6  | 6.49 |     |      |      |
| Q6ISS4 | Leukocyte-associated immunoglobulin-like receptor 2<br>OS=Homo sapiens GN=LAIR2 PE=2 SV=1 - [LAIR2_HUMAN]          | 20.39 | 1 | 1  | 1  | 1  | 0.91 | 0.88 | 0.98 | 0.95 |      | 152  | 16.3  | 5.27 |     |      |      |
| P09960 | Leukotriene A-4 hydrolase OS=Homo sapiens GN=LTA4H<br>PE=1 SV=2 - [LKH4_HUMAN]                                     | 8.02  | 1 | 4  | 4  | 8  | 1.57 | 1.56 | 1.54 | 1.52 |      | 611  | 69.2  | 6.18 |     |      |      |

|        |                                                                                                                    |       |   |    |    |    |      |      |      |      |      |      |      |      |      |       |      |
|--------|--------------------------------------------------------------------------------------------------------------------|-------|---|----|----|----|------|------|------|------|------|------|------|------|------|-------|------|
| P48059 | LIM and senescent cell antigen-like-containing domain protein 1 OS=Homo sapiens GN=LIMS1 PE=1 SV=4 - [LIMS1_HUMAN] | 2.77  | 2 | 1  | 1  | 4  | 0.74 | 0.74 | 0.70 | 0.71 | 0.67 | 0.74 | 0.70 | 0.77 | 325  | 37.2  | 8.05 |
| Q14847 | LIM and SH3 domain protein 1 OS=Homo sapiens GN=LASP1 PE=1 SV=2 - [LASP1_HUMAN]                                    | 21.46 | 1 | 4  | 4  | 16 |      |      |      |      | 1.22 | 1.05 | 1.24 | 1.09 | 261  | 29.7  | 7.05 |
| Q9UHB6 | LIM domain and actin-binding protein 1 OS=Homo sapiens GN=LIMA1 PE=1 SV=1 - [LIMA1_HUMAN]                          | 1.45  | 1 | 1  | 1  | 2  | 1.03 | 1.08 | 1.04 | 1.10 |      |      |      |      | 759  | 85.2  | 6.84 |
| P53667 | LIM domain kinase 1 OS=Homo sapiens GN=LIMK1 PE=1 SV=3 - [LIMK1_HUMAN]                                             | 2.32  | 1 | 1  | 1  | 1  | 1.84 | 2.70 | 0.81 | 1.20 |      |      |      |      | 647  | 72.5  | 6.98 |
| Q86U70 | LIM domain-binding protein 1 OS=Homo sapiens GN=LDB1 PE=1 SV=2 - [LDB1_HUMAN]                                      | 5.11  | 1 | 1  | 1  | 1  |      |      |      |      | 0.59 | 0.57 | 0.69 | 0.68 | 411  | 46.5  | 6.96 |
| O75112 | LIM domain-binding protein 3 OS=Homo sapiens GN=LDB3 PE=1 SV=2 - [LDB3_HUMAN]                                      | 3.30  | 1 | 2  | 2  | 3  | 1.31 | 1.23 | 1.15 | 1.22 |      |      |      |      | 727  | 77.1  | 8.13 |
| Q13449 | Limbic system-associated membrane protein OS=Homo sapiens GN=LSAMP PE=1 SV=2 - [LSAMP_HUMAN]                       | 3.25  | 1 | 1  | 1  | 4  | 0.95 | 0.72 | 1.08 | 0.82 |      |      |      |      | 338  | 37.4  | 6.98 |
| Q8WWY8 | Lipase member H OS=Homo sapiens GN=LIPH PE=1 SV=1 - [LIPH_HUMAN]                                                   | 7.10  | 1 | 2  | 2  | 3  | 0.91 | 0.92 | 0.89 | 0.92 | 1.50 | 1.41 | 1.54 | 1.45 | 451  | 50.8  | 7.42 |
| Q32ZL2 | Lipid phosphate phosphatase-related protein type 5 OS=Homo sapiens GN=LPPR5 PE=2 SV=2 - [LPPR5_HUMAN]              | 4.67  | 1 | 1  | 1  | 2  | 3.02 | 3.45 | 2.99 | 3.43 |      |      |      |      | 321  | 35.4  | 7.02 |
| Q93052 | Lipoma-preferred partner OS=Homo sapiens GN=LPP PE=1 SV=1 - [LPP_HUMAN]                                            | 3.76  | 1 | 1  | 1  | 2  |      |      |      |      | 1.23 | 1.10 | 1.38 | 1.23 | 612  | 65.7  | 7.37 |
| P18428 | Lipopolysaccharide-binding protein OS=Homo sapiens GN=LBP PE=1 SV=3 - [LBP_HUMAN]                                  | 25.16 | 1 | 11 | 11 | 94 | 1.05 | 1.18 | 1.06 | 1.12 | 1.16 | 1.14 | 1.02 | 1.11 | 481  | 53.3  | 6.70 |
| P50851 | Lipopolysaccharide-responsive and beige-like anchor protein OS=Homo sapiens GN=LRBA PE=1 SV=4 - [LRBA_HUMAN]       | 2.65  | 2 | 5  | 5  | 12 | 0.77 | 0.75 | 0.81 | 0.80 | 0.79 | 0.65 | 0.72 | 0.59 | 2863 | 318.9 | 5.60 |
| P06858 | Lipoprotein lipase OS=Homo sapiens GN=LPL PE=1 SV=1 - [LPL_HUMAN]                                                  | 3.58  | 1 | 1  | 1  | 3  |      |      |      |      | 0.92 | 0.98 | 0.85 | 0.90 | 475  | 53.1  | 8.15 |
| Q8IVV2 | Lipoxygenase homology domain-containing protein 1 OS=Homo sapiens GN=LOXHD1 PE=2 SV=3 - [LOXHD1_HUMAN]             | 2.88  | 1 | 3  | 3  | 3  |      |      |      |      | 0.83 | 0.69 | 0.87 | 0.73 | 1947 | 221.8 | 5.38 |
| Q13136 | Liprin-alpha-1 OS=Homo sapiens GN=PPFIA1 PE=1 SV=1 - [LIPA1_HUMAN]                                                 | 0.58  | 1 | 1  | 1  | 2  |      |      |      |      | 1.05 | 1.14 | 1.12 | 1.21 | 1202 | 135.7 | 6.29 |
| O75334 | Liprin-alpha-2 OS=Homo sapiens GN=PPFIA2 PE=1 SV=1 - [LIPA2_HUMAN]                                                 | 3.42  | 1 | 2  | 2  | 4  |      |      |      |      | 1.12 | 1.08 | 0.59 | 0.57 | 1257 | 143.1 | 5.96 |
| O75145 | Liprin-alpha-3 OS=Homo sapiens GN=PPFIA3 PE=1 SV=3 - [LIPA3_HUMAN]                                                 | 1.26  | 1 | 1  | 1  | 1  | 0.91 | 0.76 | 1.00 | 0.84 |      |      |      |      | 1194 | 133.4 | 5.68 |
| Q86W92 | Liprin-beta-1 OS=Homo sapiens GN=PPFIBP1 PE=1 SV=2 - [LIPB1_HUMAN]                                                 | 1.88  | 1 | 2  | 2  | 4  |      |      |      |      | 0.89 | 1.17 | 0.97 | 1.28 | 1011 | 114.0 | 5.55 |
| Q8ND30 | Liprin-beta-2 OS=Homo sapiens GN=PPFIBP2 PE=1 SV=3 - [LIPB2_HUMAN]                                                 | 6.39  | 1 | 2  | 3  | 8  | 1.73 | 1.14 | 1.58 | 1.03 |      |      |      |      | 876  | 98.5  | 6.27 |
| Q9P260 | LisH domain and HEAT repeat-containing protein KIAA1468 OS=Homo sapiens GN=KIAA1468 PE=1 SV=2 - [K1468_HUMAN]      | 1.07  | 1 | 1  | 1  | 1  |      |      |      |      | 1.10 | 1.23 | 0.99 | 1.11 | 1216 | 134.5 | 5.45 |
| P05451 | Lithostathine-1-alpha OS=Homo sapiens GN=REG1A PE=1 SV=3 - [REG1A_HUMAN]                                           | 10.84 | 2 | 2  | 2  | 4  |      |      |      |      | 1.59 | 1.51 | 1.44 | 1.37 | 166  | 18.7  | 5.94 |
| P23141 | Liver carboxylesterase 1 OS=Homo sapiens GN=CES1 PE=1 SV=2 - [EST1_HUMAN]                                          | 7.58  | 2 | 3  | 3  | 7  | 1.04 | 1.00 | 1.15 | 1.11 | 1.16 | 1.81 | 0.93 | 1.46 | 567  | 62.5  | 6.60 |
| Q86WA8 | Lon protease homolog 2, peroxisomal OS=Homo sapiens GN=LONP2 PE=1 SV=1 - [LONP2_HUMAN]                             | 2.11  | 1 | 1  | 1  | 1  | 0.93 | 0.82 | 1.07 | 0.95 |      |      |      |      | 852  | 94.6  | 7.30 |
| P36776 | Lon protease homolog, mitochondrial OS=Homo sapiens GN=LONP1 PE=1 SV=2 - [LONM_HUMAN]                              | 1.36  | 1 | 1  | 1  | 1  | 1.21 | 1.27 | 1.24 | 1.30 |      |      |      |      | 959  | 106.4 | 6.39 |
| Q5K4L6 | Long-chain fatty acid transport protein 3 OS=Homo sapiens GN=SLC27A3 PE=2 SV=3 - [S27A3_HUMAN]                     | 1.92  | 1 | 1  | 1  | 1  |      |      |      |      | 0.68 | 0.63 | 1.19 | 1.10 | 730  | 78.6  | 7.49 |
| Q9ULC5 | Long-chain-fatty-acid--CoA ligase 5 OS=Homo sapiens GN=ACSL5 PE=1 SV=1 - [ACSL5_HUMAN]                             | 3.51  | 1 | 1  | 1  | 1  | 0.82 | 0.89 | 0.87 | 0.95 |      |      |      |      | 683  | 75.9  | 6.92 |
| Q96GR2 | Long-chain-fatty-acid--CoA ligase ACSBG1 OS=Homo sapiens GN=ACSBG1 PE=1 SV=2 - [ACBG1_HUMAN]                       | 1.52  | 1 | 1  | 1  | 1  | 1.05 | 1.00 | 0.98 | 0.94 |      |      |      |      | 724  | 81.2  | 6.02 |

|        |                                                                                                                |       |   |    |    |     |      |      |      |      |      |      |      |      |      |      |      |       |      |
|--------|----------------------------------------------------------------------------------------------------------------|-------|---|----|----|-----|------|------|------|------|------|------|------|------|------|------|------|-------|------|
| P04000 | Long-wave-sensitive opsin 1 OS=Homo sapiens GN=OPN1LW PE=1 SV=1 - [OPSR_HUMAN]                                 | 3.30  | 2 | 1  | 1  | 1   |      |      |      |      |      |      | 1.14 | 1.20 | 1.03 | 1.08 | 364  | 40.5  | 8.60 |
| Q969J3 | Loss of heterozygosity 12 chromosomal region 1 protein OS=Homo sapiens GN=LOH12CR1 PE=1 SV=1 - [L12R1_HUMAN]   | 15.82 | 1 | 1  | 2  | 2   |      |      |      |      |      |      | 0.72 | 0.64 | 0.93 | 0.83 | 196  | 22.2  | 6.35 |
| P12318 | Low affinity immunoglobulin gamma Fc region receptor II-a OS=Homo sapiens GN=FCGR2A PE=1 SV=4 - [FCG2A_HUMAN]  | 20.19 | 3 | 4  | 4  | 11  | 1.07 | 1.00 | 0.80 | 0.94 | 0.93 | 0.99 | 0.88 | 0.93 |      |      | 317  | 35.0  | 6.68 |
| P08637 | Low affinity immunoglobulin gamma Fc region receptor III-A OS=Homo sapiens GN=FCGR3A PE=1 SV=2 - [FCG3A_HUMAN] | 17.72 | 1 | 1  | 5  | 17  | 1.09 | 1.07 | 1.09 | 1.09 |      |      |      |      |      |      | 254  | 29.1  | 8.07 |
| O75015 | Low affinity immunoglobulin gamma Fc region receptor III-B OS=Homo sapiens GN=FCGR3B PE=1 SV=2 - [FCG3B_HUMAN] | 15.45 | 1 | 1  | 5  | 15  |      |      |      |      | 1.03 | 1.05 | 1.04 | 1.07 |      |      | 233  | 26.2  | 6.71 |
| Q9NY91 | Low affinity sodium-glucose cotransporter OS=Homo sapiens GN=SLC5A4 PE=2 SV=1 - [SC5A4_HUMAN]                  | 1.52  | 1 | 1  | 1  | 1   |      |      |      |      | 0.63 | 0.65 | 0.67 | 0.70 |      |      | 659  | 72.4  | 6.15 |
| P24666 | Low molecular weight phosphotyrosine protein phosphatase OS=Homo sapiens GN=ACP1 PE=1 SV=3 - [PPAC_HUMAN]      | 13.29 | 1 | 2  | 2  | 6   |      |      |      |      | 1.27 | 1.46 | 1.10 | 1.27 |      |      | 158  | 18.0  | 6.74 |
| Q9NZR2 | Low-density lipoprotein receptor-related protein 1B OS=Homo sapiens GN=LRP1B PE=1 SV=2 - [LRP1B_HUMAN]         | 1.26  | 1 | 3  | 3  | 19  | 0.90 | 0.88 | 0.92 | 0.90 | 0.79 | 0.87 | 0.83 | 0.98 |      |      | 4599 | 515.2 | 5.30 |
| O75096 | Low-density lipoprotein receptor-related protein 4 OS=Homo sapiens GN=LRP4 PE=1 SV=4 - [LRP4_HUMAN]            | 1.47  | 1 | 2  | 2  | 3   | 0.97 | 0.54 | 0.99 | 0.55 | 0.50 | 0.64 | 0.77 | 0.98 |      |      | 1905 | 211.9 | 5.27 |
| O75197 | Low-density lipoprotein receptor-related protein 5 OS=Homo sapiens GN=LRP5 PE=1 SV=2 - [LRP5_HUMAN]            | 2.72  | 1 | 3  | 3  | 4   | 1.34 | 1.49 | 0.86 | 0.96 | 0.75 | 0.47 | 0.70 | 0.44 |      |      | 1615 | 179.0 | 5.34 |
| O75581 | Low-density lipoprotein receptor-related protein 6 OS=Homo sapiens GN=LRP6 PE=1 SV=2 - [LRP6_HUMAN]            | 0.62  | 1 | 1  | 1  | 1   |      |      |      |      | 0.88 | 0.88 | 1.05 | 1.05 |      |      | 1613 | 180.3 | 5.31 |
| Q14114 | Low-density lipoprotein receptor-related protein 8 OS=Homo sapiens GN=LRP8 PE=1 SV=4 - [LRP8_HUMAN]            | 1.45  | 1 | 1  | 1  | 1   | 1.00 | 0.60 | 1.09 | 0.65 |      |      |      |      |      |      | 963  | 105.6 | 5.05 |
| P51884 | Lumican OS=Homo sapiens GN=LUM PE=1 SV=2 - [LUM_HUMAN]                                                         | 43.20 | 1 | 13 | 13 | 145 | 0.85 | 0.83 | 0.86 | 0.83 | 0.65 | 0.61 | 0.69 | 0.63 |      |      | 338  | 38.4  | 6.61 |
| Q8IYD9 | Lung adenoma susceptibility protein 2 OS=Homo sapiens GN=LAS2 PE=2 SV=1 - [LAS2_HUMAN]                         | 4.57  | 1 | 1  | 1  | 1   | 0.51 | 0.47 | 0.51 | 0.48 |      |      |      |      |      |      | 372  | 41.8  | 8.19 |
| P22888 | Lutropin-choriogonadotropic hormone receptor OS=Homo sapiens GN=LHCGR PE=1 SV=4 - [LSHR_HUMAN]                 | 1.29  | 1 | 1  | 1  | 1   | 1.24 | 1.63 | 1.21 | 1.59 |      |      |      |      |      |      | 699  | 78.6  | 8.50 |
| Q8N2G4 | Ly6/PLAUR domain-containing protein 1 OS=Homo sapiens GN=LYPD1 PE=1 SV=2 - [LYPD1_HUMAN]                       | 5.67  | 1 | 1  | 1  | 1   |      |      |      |      | 1.92 | 2.12 | 1.23 | 1.36 |      |      | 141  | 15.2  | 8.02 |
| O95274 | Ly6/PLAUR domain-containing protein 3 OS=Homo sapiens GN=LYPD3 PE=1 SV=2 - [LYPD3_HUMAN]                       | 13.58 | 1 | 3  | 3  | 5   | 1.72 | 1.57 | 1.73 | 1.59 |      |      |      |      |      |      | 346  | 35.9  | 7.75 |
| Q9Y5Y7 | Lymphatic vessel endothelial hyaluronidase 1 OS=Homo sapiens GN=LYVE1 PE=1 SV=2 - [LYVE1_HUMAN]                | 31.99 | 1 | 8  | 8  | 49  | 0.85 | 0.91 | 0.85 | 0.92 | 0.92 | 0.86 | 0.81 | 0.78 |      |      | 322  | 35.2  | 8.28 |
| Q5SQ64 | Lymphocyte antigen 6 complex locus protein G6f OS=Homo sapiens GN=LY6G6F PE=1 SV=2 - [LY66F_HUMAN]             | 14.14 | 1 | 4  | 4  | 12  | 0.96 | 0.97 | 0.90 | 0.92 | 1.22 | 1.22 | 1.17 | 1.23 |      |      | 297  | 32.4  | 8.56 |
| O95711 | Lymphocyte antigen 86 OS=Homo sapiens GN=LY86 PE=1 SV=1 - [LY86_HUMAN]                                         | 9.26  | 1 | 1  | 1  | 2   |      |      |      |      | 1.04 | 1.15 | 2.93 | 3.22 |      |      | 162  | 17.9  | 6.07 |
| Q13094 | Lymphocyte cytosolic protein 2 OS=Homo sapiens GN=LCP2 PE=1 SV=1 - [LCP2_HUMAN]                                | 2.06  | 1 | 2  | 2  | 3   | 1.08 | 1.35 | 1.01 | 1.26 | 1.11 | 1.16 | 1.10 | 1.15 |      |      | 533  | 60.2  | 6.27 |
| Q15046 | Lysine--tRNA ligase OS=Homo sapiens GN=KARS PE=1 SV=3 - [SYK_HUMAN]                                            | 2.01  | 1 | 1  | 1  | 1   | 0.91 | 1.01 | 1.07 | 1.18 |      |      |      |      |      |      | 597  | 68.0  | 6.35 |
| Q8NHM5 | Lysine-specific demethylase 2B OS=Homo sapiens GN=KDM2B PE=1 SV=1 - [KDM2B_HUMAN]                              | 0.60  | 1 | 1  | 1  | 2   | 0.87 | 0.85 | 1.00 | 0.97 |      |      |      |      |      |      | 1336 | 152.5 | 8.56 |
| Q9Y4C1 | Lysine-specific demethylase 3A OS=Homo sapiens GN=KDM3A PE=1 SV=4 - [KDM3A_HUMAN]                              | 2.57  | 1 | 2  | 2  | 15  | 0.87 | 0.70 | 0.74 | 0.60 | 1.40 | 0.96 | 1.36 | 0.93 |      |      | 1321 | 147.2 | 8.07 |
| Q7LBC6 | Lysine-specific demethylase 3B OS=Homo sapiens GN=KDM3B PE=1 SV=2 - [KDM3B_HUMAN]                              | 1.59  | 1 | 2  | 2  | 3   | 1.02 | 0.78 | 0.90 | 0.70 | 1.61 | 2.32 | 0.69 | 0.99 |      |      | 1761 | 191.5 | 7.18 |
| Q6B0I6 | Lysine-specific demethylase 4D OS=Homo sapiens GN=KDM4D PE=1 SV=3 - [KDM4D_HUMAN]                              | 1.91  | 1 | 1  | 1  | 2   |      |      |      |      | 1.04 | 0.95 | 0.84 | 0.77 |      |      | 523  | 58.6  | 9.16 |
| Q9UGL1 | Lysine-specific demethylase 5B OS=Homo sapiens GN=KDM5B PE=1 SV=3 - [KDM5B_HUMAN]                              | 1.62  | 1 | 1  | 1  | 2   | 1.27 | 1.00 |      |      |      |      |      |      |      |      | 1544 | 175.5 | 6.70 |

|        |                                                                                                       |       |   |   |   |    |      |      |      |      |      |      |      |      |      |       |      |  |  |  |      |       |      |
|--------|-------------------------------------------------------------------------------------------------------|-------|---|---|---|----|------|------|------|------|------|------|------|------|------|-------|------|--|--|--|------|-------|------|
| Q9BY66 | Lysine-specific demethylase 5D OS=Homo sapiens<br>GN=KDM5D PE=1 SV=2 - [KDM5D_HUMAN]                  | 2.08  | 2 | 3 | 3 | 5  | 1.48 | 1.60 | 1.53 | 1.65 |      |      |      |      |      |       |      |  |  |  | 1539 | 174.0 | 5.85 |
| O15054 | Lysine-specific demethylase 6B OS=Homo sapiens<br>GN=KDM6B PE=1 SV=4 - [KDM6B_HUMAN]                  | 1.22  | 1 | 1 | 1 | 1  | 0.28 | 0.74 | 0.22 | 0.58 |      |      |      |      |      |       |      |  |  |  | 1643 | 176.5 | 8.54 |
| O60341 | Lysine-specific histone demethylase 1A OS=Homo sapiens<br>GN=KDM1A PE=1 SV=2 - [KDM1A_HUMAN]          | 1.29  | 1 | 1 | 1 | 1  |      |      |      |      | 0.88 | 0.85 | 0.92 | 0.90 | 852  | 92.8  | 6.52 |  |  |  |      |       |      |
| Q8NB78 | Lysine-specific histone demethylase 1B OS=Homo sapiens<br>GN=KDM1B PE=1 SV=3 - [KDM1B_HUMAN]          | 1.46  | 1 | 1 | 1 | 1  |      |      |      |      | 6.91 | 6.70 | 6.33 | 6.14 | 822  | 92.0  | 7.87 |  |  |  |      |       |      |
| Q92633 | Lysophosphatidic acid receptor 1 OS=Homo sapiens<br>GN=LPAR1 PE=1 SV=3 - [LPAR1_HUMAN]                | 5.77  | 1 | 1 | 1 | 1  |      |      |      |      | 0.52 | 0.66 | 0.60 | 0.77 | 364  | 41.1  | 8.53 |  |  |  |      |       |      |
| P43657 | Lysophosphatidic acid receptor 6 OS=Homo sapiens<br>GN=LPAR6 PE=1 SV=3 - [LPAR6_HUMAN]                | 2.91  | 1 | 2 | 2 | 3  |      |      |      |      | 0.98 | 0.95 | 1.06 | 1.03 | 344  | 39.4  | 8.98 |  |  |  |      |       |      |
| Q6ZWT7 | Lysophospholipid acyltransferase 2 OS=Homo sapiens<br>GN=MBOAT2 PE=2 SV=2 - [MBOA2_HUMAN]             | 2.12  | 1 | 1 | 1 | 2  |      |      |      |      | 2.24 | 2.17 | 2.12 | 2.05 | 520  | 59.5  | 8.03 |  |  |  |      |       |      |
| P10253 | Lysosomal alpha-glucosidase OS=Homo sapiens GN=GAA<br>PE=1 SV=4 - [LYAG_HUMAN]                        | 1.05  | 1 | 1 | 1 | 2  | 1.11 | 1.01 | 1.21 | 1.10 |      |      |      |      | 952  | 105.3 | 6.00 |  |  |  |      |       |      |
| P42785 | Lysosomal Pro-X carboxypeptidase OS=Homo sapiens<br>GN=PRCP PE=1 SV=1 - [PCP_HUMAN]                   | 10.48 | 1 | 3 | 3 | 7  | 0.99 | 1.03 | 1.02 | 1.09 |      |      |      |      | 496  | 55.8  | 7.21 |  |  |  |      |       |      |
| P10619 | Lysosomal protective protein OS=Homo sapiens GN=CTSA<br>PE=1 SV=2 - [PPGB_HUMAN]                      | 13.96 | 1 | 6 | 6 | 17 | 1.32 | 1.28 | 1.29 | 1.31 | 1.03 | 1.08 | 0.93 | 0.91 | 480  | 54.4  | 6.61 |  |  |  |      |       |      |
| Q13571 | Lysosomal-associated transmembrane protein 5 OS=Homo sapiens<br>GN=LAPTM5 PE=1 SV=1 - [LAPM5_HUMAN]   | 8.02  | 1 | 1 | 1 | 1  | 0.61 | 0.67 | 0.81 | 0.89 |      |      |      |      | 262  | 29.9  | 8.68 |  |  |  |      |       |      |
| Q99698 | Lysosomal-trafficking regulator OS=Homo sapiens GN=LYST<br>PE=1 SV=3 - [LYST_HUMAN]                   | 0.37  | 1 | 1 | 1 | 1  | 0.84 | 0.84 | 0.89 | 0.89 |      |      |      |      | 3801 | 428.9 | 6.61 |  |  |  |      |       |      |
| P11279 | Lysosome-associated membrane glycoprotein 1 OS=Homo sapiens<br>GN=LAMP1 PE=1 SV=3 - [LAMP1_HUMAN]     | 3.60  | 1 | 2 | 2 | 3  | 1.18 | 1.22 | 1.24 | 1.29 |      |      |      |      | 417  | 44.9  | 8.75 |  |  |  |      |       |      |
| P13473 | Lysosome-associated membrane glycoprotein 2 OS=Homo sapiens<br>GN=LAMP2 PE=1 SV=2 - [LAMP2_HUMAN]     | 7.07  | 1 | 3 | 3 | 17 | 1.07 | 1.15 | 1.01 | 1.09 | 0.86 | 0.81 | 0.91 | 0.85 | 410  | 44.9  | 5.63 |  |  |  |      |       |      |
| Q9UQV4 | Lysosome-associated membrane glycoprotein 3 OS=Homo sapiens<br>GN=LAMP3 PE=1 SV=3 - [LAMP3_HUMAN]     | 5.05  | 1 | 1 | 1 | 2  |      |      |      |      | 0.31 | 0.22 | 1.22 | 0.88 | 416  | 44.3  | 8.41 |  |  |  |      |       |      |
| P61626 | Lysozyme C OS=Homo sapiens GN=LYZ PE=1 SV=1 - [LYSC_HUMAN]                                            | 56.08 | 1 | 8 | 8 | 50 | 0.79 | 0.66 | 0.83 | 0.70 | 1.14 | 1.20 | 1.12 | 1.22 | 148  | 16.5  | 9.16 |  |  |  |      |       |      |
| Q96KX0 | Lysozyme-like protein 4 OS=Homo sapiens GN=LYZL4 PE=2<br>SV=1 - [LYZL4_HUMAN]                         | 4.79  | 1 | 1 | 1 | 1  |      |      |      |      | 1.43 | 1.32 | 1.40 | 1.30 | 146  | 16.4  | 8.28 |  |  |  |      |       |      |
| Q08397 | Lysyl oxidase homolog 1 OS=Homo sapiens GN=LOXL1 PE=2<br>SV=2 - [LOXL1_HUMAN]                         | 1.39  | 1 | 1 | 1 | 1  |      |      |      |      | 0.95 | 0.83 | 1.21 | 1.04 | 574  | 63.1  | 7.52 |  |  |  |      |       |      |
| P30307 | M-phase inducer phosphatase 3 OS=Homo sapiens<br>GN=CDC25C PE=1 SV=2 - [MPIP3_HUMAN]                  | 5.07  | 1 | 2 | 2 | 19 | 1.29 | 1.28 | 1.39 | 1.30 |      |      |      |      | 473  | 53.3  | 6.79 |  |  |  |      |       |      |
| Q99547 | M-phase phosphoprotein 6 OS=Homo sapiens<br>GN=MPHOSPH6 PE=1 SV=2 - [MPH6_HUMAN]                      | 7.50  | 1 | 1 | 1 | 14 | 0.94 | 0.86 | 0.96 | 0.86 | 0.90 | 0.70 | 0.88 | 0.67 | 160  | 19.0  | 5.20 |  |  |  |      |       |      |
| Q99549 | M-phase phosphoprotein 8 OS=Homo sapiens<br>GN=MPHOSPH8 PE=1 SV=2 - [MPP8_HUMAN]                      | 1.63  | 1 | 1 | 1 | 1  |      |      |      |      | 1.11 | 1.00 | 1.12 | 1.00 | 860  | 97.1  | 6.06 |  |  |  |      |       |      |
| Q99550 | M-phase phosphoprotein 9 OS=Homo sapiens<br>GN=MPHOSPH9 PE=1 SV=3 - [MPP9_HUMAN]                      | 2.91  | 1 | 2 | 2 | 2  | 1.54 | 1.20 | 1.54 | 1.42 |      |      |      |      | 1031 | 116.1 | 6.38 |  |  |  |      |       |      |
| Q8N5G2 | Macciilin OS=Homo sapiens GN=TMEM57 PE=1 SV=1 - [MACOI_HUMAN]                                         | 3.77  | 1 | 2 | 3 | 14 | 0.88 | 0.68 | 0.78 | 0.53 | 1.27 | 1.05 | 1.42 | 1.11 | 664  | 76.1  | 9.07 |  |  |  |      |       |      |
| P09603 | Macrophage colony-stimulating factor 1 OS=Homo sapiens<br>GN=CSF1 PE=1 SV=2 - [CSF1_HUMAN]            | 2.53  | 1 | 1 | 1 | 1  | 1.25 | 0.52 | 1.20 | 0.50 |      |      |      |      | 554  | 60.1  | 5.29 |  |  |  |      |       |      |
| P07333 | Macrophage colony-stimulating factor 1 receptor OS=Homo sapiens<br>GN=CSF1R PE=1 SV=2 - [CSF1R_HUMAN] | 5.97  | 1 | 6 | 6 | 18 | 1.20 | 1.22 | 1.22 | 1.24 |      |      |      |      | 972  | 107.9 | 6.37 |  |  |  |      |       |      |
| P22897 | Macrophage mannose receptor 1 OS=Homo sapiens<br>GN=MRC1 PE=1 SV=1 - [MRC1_HUMAN]                     | 2.82  | 1 | 4 | 4 | 7  | 1.00 | 1.03 | 1.03 | 1.06 | 1.15 | 1.10 | 1.07 | 1.07 | 1456 | 165.9 | 6.54 |  |  |  |      |       |      |
| P39900 | Macrophage metalloelastase OS=Homo sapiens GN=MMP12<br>PE=1 SV=1 - [MMP12_HUMAN]                      | 1.70  | 1 | 1 | 1 | 1  |      |      |      |      | 1.64 | 1.60 | 1.96 | 1.90 | 470  | 54.0  | 8.66 |  |  |  |      |       |      |

|        |                                                                                                                       |       |   |    |    |     |      |      |      |      |      |      |       |       |      |       |      |
|--------|-----------------------------------------------------------------------------------------------------------------------|-------|---|----|----|-----|------|------|------|------|------|------|-------|-------|------|-------|------|
| P14174 | Macrophage migration inhibitory factor OS=Homo sapiens<br>GN=MIF PE=1 SV=4 - [MIF_HUMAN]                              | 17.39 | 1 | 2  | 2  | 5   |      | 0.86 | 0.84 | 1.02 | 1.01 | 115  | 12.5  | 7.88  |      |       |      |
| Q9UEW3 | Macrophage receptor MARCO OS=Homo sapiens<br>GN=MARCO PE=1 SV=1 - [MARCO_HUMAN]                                       | 3.08  | 1 | 1  | 1  | 2   | 0.81 | 0.74 | 0.90 | 0.84 |      | 520  | 52.6  | 8.78  |      |       |      |
| Q8N3R9 | MAGUK p55 subfamily member 5 OS=Homo sapiens<br>GN=MPP5 PE=1 SV=3 - [MPP5_HUMAN]                                      | 1.04  | 1 | 1  | 1  | 4   | 1.78 | 1.81 | 1.75 | 1.84 |      | 675  | 77.2  | 6.14  |      |       |      |
| Q14728 | Major facilitator superfamily domain-containing protein 10<br>OS=Homo sapiens GN=MFSD10 PE=2 SV=1 -<br>[MFSD10_HUMAN] | 7.47  | 1 | 1  | 1  | 1   |      | 0.78 | 0.64 | 0.81 | 0.66 | 455  | 48.3  | 9.60  |      |       |      |
| Q8NA29 | Major facilitator superfamily domain-containing protein 2A<br>OS=Homo sapiens GN=MFSD2A PE=1 SV=1 -<br>[MFSD2A_HUMAN] | 5.16  | 1 | 1  | 1  | 1   |      | 1.93 | 1.29 | 1.64 | 1.09 | 543  | 60.1  | 6.95  |      |       |      |
| P40925 | Malate dehydrogenase, cytoplasmic OS=Homo sapiens<br>GN=MDH1 PE=1 SV=4 - [MDHC_HUMAN]                                 | 10.78 | 1 | 2  | 2  | 3   | 0.94 | 1.04 | 0.90 | 0.75 |      | 334  | 36.4  | 7.36  |      |       |      |
| Q68DK7 | Male-specific lethal 1 homolog OS=Homo sapiens GN=MSL1<br>PE=1 SV=3 - [MSL1_HUMAN]                                    | 3.26  | 1 | 1  | 1  | 1   |      | 0.87 | ###  | 0.44 | 7.19 | 614  | 67.1  | 8.92  |      |       |      |
| Q9Y4C4 | Malignant fibrous histiocytoma-amplified sequence 1<br>OS=Homo sapiens GN=MFHAS1 PE=1 SV=2 -<br>[MFHA1_HUMAN]         | 1.90  | 1 | 2  | 2  | 2   |      | 4.59 | 3.38 | 3.71 | 2.73 | 1052 | 116.9 | 7.88  |      |       |      |
| P48740 | Mannan-binding lectin serine protease 1 OS=Homo sapiens<br>GN=MASP1 PE=1 SV=3 - [MASP1_HUMAN]                         | 31.76 | 1 | 16 | 16 | 97  | 1.16 | 1.14 | 1.17 | 1.17 | 1.05 | 1.04 | 0.98  | 0.99  | 699  | 79.2  | 5.49 |
| O00187 | Mannan-binding lectin serine protease 2 OS=Homo sapiens<br>GN=MASP2 PE=1 SV=4 - [MASP2_HUMAN]                         | 21.87 | 1 | 11 | 11 | 75  | 1.24 | 1.23 | 1.27 | 1.28 | 1.35 | 1.34 | 1.42  | 1.38  | 686  | 75.7  | 5.63 |
| P11226 | Mannose-binding protein C OS=Homo sapiens GN=MBL2<br>PE=1 SV=2 - [MBL2_HUMAN]                                         | 52.82 | 1 | 11 | 11 | 102 | 1.10 | 1.21 | 1.11 | 1.26 | 1.16 | 1.13 | 1.13  | 1.08  | 248  | 26.1  | 5.49 |
| P33908 | Mannosyl-oligosaccharide 1,2-alpha-mannosidase IA<br>OS=Homo sapiens GN=MAN1A1 PE=1 SV=3 -<br>[MA1A1_HUMAN]           | 16.69 | 1 | 7  | 10 | 41  | 1.02 | 1.02 | 1.08 | 1.05 | 1.26 | 1.30 | 1.10  | 1.16  | 653  | 72.9  | 6.47 |
| O60476 | Mannosyl-oligosaccharide 1,2-alpha-mannosidase IB<br>OS=Homo sapiens GN=MAN1A2 PE=2 SV=1 -<br>[MA1A2_HUMAN]           | 2.18  | 1 | 1  | 2  | 3   |      | 1.46 | 1.34 | 1.16 | 1.06 | 641  | 73.0  | 7.61  |      |       |      |
| Q9NR34 | Mannosyl-oligosaccharide 1,2-alpha-mannosidase IC<br>OS=Homo sapiens GN=MAN1C1 PE=1 SV=1 -<br>[MA1C1_HUMAN]           | 2.38  | 1 | 2  | 2  | 5   | 1.72 | 1.75 | 1.62 | 1.65 | 1.22 | 1.60 | 1.10  | 1.45  | 630  | 70.9  | 7.46 |
| Q13724 | Mannosyl-oligosaccharide glucosidase OS=Homo sapiens<br>GN=MOGS PE=1 SV=5 - [MOGS_HUMAN]                              | 4.06  | 1 | 2  | 2  | 3   | 1.13 | 1.11 | 1.19 | 1.18 | 2.11 | 2.20 | 1.94  | 2.02  | 837  | 91.9  | 8.90 |
| Q9H8J5 | MANSC domain-containing protein 1 OS=Homo sapiens<br>GN=MANSC1 PE=2 SV=1 - [MANS1_HUMAN]                              | 9.28  | 1 | 2  | 2  | 4   | 2.01 | 1.28 | 0.94 | 0.88 | 1.15 | 1.07 | 431   | 46.8  | 6.54 |       |      |
| Q16644 | MAP kinase-activated protein kinase 3 OS=Homo sapiens<br>GN=MAPKAPK3 PE=1 SV=1 - [MAPK3_HUMAN]                        | 4.45  | 1 | 1  | 1  | 1   | 1.01 | 0.87 | 1.04 | 0.91 |      | 382  | 43.0  | 7.28  |      |       |      |
| Q9H9H5 | MAP6 domain-containing protein 1 OS=Homo sapiens<br>GN=MAP6D1 PE=1 SV=1 - [MA6D1_HUMAN]                               | 9.55  | 1 | 1  | 1  | 1   |      | 1.00 | 1.10 | 0.84 | 0.92 | 199  | 21.0  | 10.07 |      |       |      |
| Q3KQU3 | MAP7 domain-containing protein 1 OS=Homo sapiens<br>GN=MAP7D1 PE=1 SV=1 - [MA7D1_HUMAN]                               | 5.47  | 1 | 2  | 2  | 2   | 0.73 | 0.77 | 0.66 | 0.70 |      | 841  | 92.8  | 10.11 |      |       |      |
| Q96T17 | MAP7 domain-containing protein 2 OS=Homo sapiens<br>GN=MAP7D2 PE=1 SV=2 - [MA7D2_HUMAN]                               | 5.19  | 1 | 2  | 2  | 2   |      | 1.19 | 0.86 | 1.10 | 0.79 | 732  | 81.9  | 8.84  |      |       |      |
| Q9UQ07 | MAPK/MAK/MRK overlapping kinase OS=Homo sapiens<br>GN=MOK PE=2 SV=1 - [MOK_HUMAN]                                     | 5.01  | 1 | 1  | 1  | 1   |      | 1.08 | 1.62 | 0.96 | 1.43 | 419  | 48.0  | 9.60  |      |       |      |
| Q86SM8 | Mas-related G-protein coupled receptor member E OS=Homo sapiens<br>GN=MRGPPE PE=2 SV=2 - [MRGRE_HUMAN]                | 2.25  | 1 | 1  | 1  | 1   |      | 0.91 | 0.62 | 0.94 | 0.63 | 311  | 34.1  | 8.09  |      |       |      |
| P35410 | Mas-related G-protein coupled receptor MRG OS=Homo sapiens<br>GN=MAS1L PE=2 SV=1 - [MAS1L_HUMAN]                      | 2.12  | 1 | 1  | 1  | 4   |      | 0.67 | 0.41 | 0.70 | 0.33 | 378  | 42.4  | 8.32  |      |       |      |
| P10721 | Mast/stem cell growth factor receptor Kit OS=Homo sapiens<br>GN=KIT PE=1 SV=1 - [KIT_HUMAN]                           | 6.56  | 1 | 6  | 6  | 14  | 1.11 | 1.02 | 1.04 | 0.98 | 1.20 | 0.78 | 1.08  | 0.74  | 976  | 109.8 | 6.98 |
| Q13495 | Mastermind-like domain-containing protein 1 OS=Homo sapiens<br>GN=MAMLD1 PE=1 SV=2 - [MAMD1_HUMAN]                    | 1.42  | 1 | 2  | 2  | 2   |      | 0.89 | 0.88 | 0.90 | 0.89 | 774  | 83.2  | 8.29  |      |       |      |
| Q81ZL2 | Mastermind-like protein 2 OS=Homo sapiens GN=MAML2<br>PE=1 SV=2 - [MAML2_HUMAN]                                       | 1.56  | 1 | 1  | 1  | 1   | 0.63 | 0.62 | 0.69 | 0.69 |      | 1156 | 125.1 | 9.42  |      |       |      |
| Q14680 | Maternal embryonic leucine zipper kinase OS=Homo sapiens<br>GN=MELK PE=1 SV=3 - [MELK_HUMAN]                          | 4.30  | 1 | 2  | 2  | 3   |      | 0.86 | 0.99 | 0.92 | 1.06 | 651  | 74.6  | 8.72  |      |       |      |

|        |                                                                                                                         |       |   |    |    |    |      |      |      |      |      |      |      |      |      |       |      |
|--------|-------------------------------------------------------------------------------------------------------------------------|-------|---|----|----|----|------|------|------|------|------|------|------|------|------|-------|------|
| P43243 | Matrin-3 OS=Homo sapiens GN=MATR3 PE=1 SV=2 - [MATR3_HUMAN]                                                             | 3.78  | 1 | 1  | 1  | 2  | 1.84 | 1.65 | 1.72 | 1.54 |      | 847  | 94.6 | 6.25 |      |       |      |
| P08493 | Matrix Gla protein OS=Homo sapiens GN=MGP PE=1 SV=2 - [MGP_HUMAN]                                                       | 10.68 | 1 | 1  | 1  | 9  |      |      |      |      | 1.05 | 1.06 | 1.26 | 1.26 | 103  | 12.3  | 9.67 |
| P50281 | Matrix metalloproteinase-14 OS=Homo sapiens GN=MMP14 PE=1 SV=3 - [MMP14_HUMAN]                                          | 1.55  | 1 | 1  | 1  | 3  |      |      |      |      | 1.29 | 1.26 | 1.31 | 1.27 | 582  | 65.9  | 7.77 |
| P51512 | Matrix metalloproteinase-16 OS=Homo sapiens GN=MMP16 PE=1 SV=2 - [MMP16_HUMAN]                                          | 2.64  | 1 | 2  | 2  | 5  |      |      |      |      | 0.99 | 0.74 | 0.80 | 1.02 | 607  | 69.5  | 8.54 |
| O60882 | Matrix metalloproteinase-20 OS=Homo sapiens GN=MMP20 PE=1 SV=3 - [MMP20_HUMAN]                                          | 2.07  | 1 | 1  | 1  | 1  |      |      |      |      | 0.70 | 0.81 | 0.64 | 0.75 | 483  | 54.4  | 8.87 |
| Q9NRE1 | Matrix metalloproteinase-26 OS=Homo sapiens GN=MMP26 PE=2 SV=2 - [MMP26_HUMAN]                                          | 3.45  | 1 | 1  | 1  | 1  | 1.23 | 1.00 | 1.06 | 0.86 |      |      |      |      | 261  | 29.7  | 6.47 |
| P14780 | Matrix metalloproteinase-9 OS=Homo sapiens GN=MMP9 PE=1 SV=3 - [MMP9_HUMAN]                                             | 27.44 | 1 | 16 | 16 | 75 | 1.29 | 1.31 | 1.34 | 1.37 | 1.32 | 1.33 | 1.31 | 1.36 | 707  | 78.4  | 6.06 |
| Q9NR99 | Matrix-remodeling-associated protein 5 OS=Homo sapiens GN=MXRA5 PE=2 SV=3 - [MXRA5_HUMAN]                               | 2.09  | 1 | 2  | 2  | 3  |      |      |      |      | 1.02 | 0.80 | 1.00 | 0.79 | 2828 | 312.0 | 8.32 |
| Q8IW9  | MAX gene-associated protein OS=Homo sapiens GN=MGA PE=1 SV=2 - [MGAP_HUMAN]                                             | 0.50  | 1 | 1  | 1  | 1  | 0.71 | 0.79 | 0.64 | 0.71 |      |      |      |      | 3026 | 331.6 | 6.79 |
| Q9NPJ1 | McKusick-Kaufman/Bardet-Biedl syndromes putative chaperonin OS=Homo sapiens GN=MKKS PE=1 SV=1 - [MKKS_HUMAN]            | 2.46  | 1 | 1  | 1  | 1  | 0.81 | 0.65 | 0.83 | 0.67 |      |      |      |      | 570  | 62.3  | 7.08 |
| Q96DY7 | Mdm2-binding protein OS=Homo sapiens GN=MTBP PE=1 SV=1 - [MTBP_HUMAN]                                                   | 2.77  | 1 | 2  | 2  | 2  | 1.29 | 0.99 | 0.88 | 0.69 | 1.62 | 1.55 | 1.52 | 1.45 | 904  | 102.1 | 7.77 |
| Q03112 | MDS1 and EVI1 complex locus protein EVI1 OS=Homo sapiens GN=MECOM PE=1 SV=2 - [EVI1_HUMAN]                              | 3.71  | 1 | 2  | 2  | 5  | 0.38 | 0.21 | 0.40 | 0.30 | 0.83 | 0.69 | 0.70 | 0.59 | 1051 | 118.2 | 6.74 |
| Q5HYA8 | Meckelin OS=Homo sapiens GN=TMEM67 PE=1 SV=2 - [MKS3_HUMAN]                                                             | 1.81  | 1 | 1  | 1  | 2  | 0.86 | 0.68 | 1.02 | 0.82 | 1.19 | 0.99 | 1.03 | 0.86 | 995  | 111.7 | 6.77 |
| Q14676 | Mediator of DNA damage checkpoint protein 1 OS=Homo sapiens GN=MDC1 PE=1 SV=3 - [MDC1_HUMAN]                            | 1.39  | 1 | 1  | 1  | 1  | 1.21 | 1.09 | 1.04 | 0.95 |      |      |      |      | 2089 | 226.5 | 5.47 |
| Q15648 | Mediator of RNA polymerase II transcription subunit 1 OS=Homo sapiens GN=MED1 PE=1 SV=4 - [MED1_HUMAN]                  | 0.89  | 1 | 1  | 1  | 1  |      |      |      |      | 2.37 | 2.28 | 2.14 | 2.06 | 1581 | 168.4 | 8.73 |
| Q86YW9 | Mediator of RNA polymerase II transcription subunit 12-like protein OS=Homo sapiens GN=MED12L PE=1 SV=2 - [MD12L_HUMAN] | 2.19  | 1 | 3  | 3  | 4  | 0.73 | 0.72 | 0.74 | 0.74 | 1.12 | 1.05 | 1.25 | 1.18 | 2145 | 240.0 | 7.77 |
| Q9UHV7 | Mediator of RNA polymerase II transcription subunit 13 OS=Homo sapiens GN=MED13 PE=1 SV=3 - [MED13_HUMAN]               | 3.59  | 1 | 5  | 6  | 6  | 1.06 | 1.16 | 1.21 | 1.34 | 0.36 | 0.64 | 0.71 | 1.28 | 2174 | 239.1 | 5.64 |
| Q71F56 | Mediator of RNA polymerase II transcription subunit 13-like OS=Homo sapiens GN=MED13L PE=1 SV=1 - [MD13L_HUMAN]         | 2.13  | 1 | 2  | 2  | 6  | 1.06 | 0.82 | 1.17 | 0.92 |      |      |      |      | 2210 | 242.4 | 6.04 |
| Q96RN5 | Mediator of RNA polymerase II transcription subunit 15 OS=Homo sapiens GN=MED15 PE=1 SV=2 - [MED15_HUMAN]               | 4.31  | 1 | 2  | 2  | 4  |      |      |      |      | 0.82 | 0.95 | 0.89 | 1.03 | 788  | 86.7  | 9.42 |
| Q9Y2X0 | Mediator of RNA polymerase II transcription subunit 16 OS=Homo sapiens GN=MED16 PE=1 SV=2 - [MED16_HUMAN]               | 1.60  | 1 | 1  | 1  | 1  |      |      |      |      | 1.06 | 1.12 | 1.11 | 1.17 | 877  | 96.7  | 7.37 |
| Q96HR3 | Mediator of RNA polymerase II transcription subunit 30 OS=Homo sapiens GN=MED30 PE=1 SV=1 - [MED30_HUMAN]               | 8.43  | 1 | 2  | 2  | 12 | 1.29 | 1.25 | 1.08 | 1.24 | 0.84 | 0.80 | 1.05 | 0.96 | 178  | 20.3  | 8.27 |
| Q9Y4F3 | Meiosis arrest female protein 1 OS=Homo sapiens GN=KIAA0430 PE=1 SV=6 - [MARF1_HUMAN]                                   | 1.55  | 1 | 1  | 1  | 1  | 0.85 | 0.61 | 0.97 | 0.70 |      |      |      |      | 1742 | 192.7 | 7.87 |
| Q5TIA1 | Meiosis inhibitor protein 1 OS=Homo sapiens GN=MEI1 PE=2 SV=2 - [MEI1_HUMAN]                                            | 0.47  | 1 | 1  | 1  | 1  | 0.61 | 0.71 | 0.46 | 0.55 |      |      |      |      | 1274 | 141.1 | 6.70 |
| A8MW99 | Meiosis-specific protein MEI4-like OS=Homo sapiens GN=MEI4 PE=3 SV=1 - [MEI4L_HUMAN]                                    | 2.33  | 1 | 1  | 1  | 3  | 0.69 | 0.66 | 0.79 | 0.76 | 0.85 | 0.81 | 0.73 | 0.70 | 386  | 44.2  | 6.16 |
| Q9BWT6 | Meiotic nuclear division protein 1 homolog OS=Homo sapiens GN=MND1 PE=1 SV=1 - [MND1_HUMAN]                             | 6.83  | 1 | 1  | 1  | 3  |      |      |      |      | 1.24 | 1.06 | 1.47 | 1.25 | 205  | 23.7  | 8.19 |
| Q14565 | Meiotic recombination protein DMC1/LIM15 homolog OS=Homo sapiens GN=DMC1 PE=1 SV=2 - [DMC1_HUMAN]                       | 7.65  | 1 | 2  | 2  | 2  | 0.89 | 1.01 | 0.91 | 1.05 |      |      |      |      | 340  | 37.7  | 5.88 |
| Q7Z4M0 | Meiotic recombination protein REC114-like OS=Homo sapiens GN=C15orf60 PE=2 SV=2 - [R114L_HUMAN]                         | 6.39  | 1 | 1  | 1  | 3  |      |      |      |      | 1.15 | 1.13 | 1.26 | 1.35 | 266  | 29.1  | 5.66 |

|        |                                                                                                                                        |       |   |    |    |    |      |      |      |      |      |      |      |      |      |       |       |
|--------|----------------------------------------------------------------------------------------------------------------------------------------|-------|---|----|----|----|------|------|------|------|------|------|------|------|------|-------|-------|
| Q9Y5K1 | Meiotic recombination protein SPO11 OS=Homo sapiens<br>GN=SPO11 PE=2 SV=1 - [SPO11_HUMAN]                                              | 2.53  | 1 | 1  | 1  | 1  | 1.16 | 1.29 | 1.16 | 1.30 |      | 396  | 44.5 | 8.87 |      |       |       |
| Q99705 | Melanin-concentrating hormone receptor 1 OS=Homo sapiens<br>GN=MCHR1 PE=1 SV=2 - [MCHR1_HUMAN]                                         | 1.42  | 1 | 1  | 1  | 1  |      |      |      |      | 0.62 | 0.67 | 0.61 | 0.66 | 422  | 45.9  | 8.98  |
| P43360 | Melanoma-associated antigen 6 OS=Homo sapiens<br>GN=MAGEA6 PE=1 SV=1 - [MAGA6_HUMAN]                                                   | 4.78  | 1 | 1  | 1  | 3  |      |      |      |      | 2.38 | 1.23 | 1.89 | 0.97 | 314  | 34.9  | 4.59  |
| A8MXT2 | Melanoma-associated antigen B17 OS=Homo sapiens<br>GN=MAGEB17 PE=4 SV=2 - [MAGBH_HUMAN]                                                | 6.35  | 1 | 2  | 3  | 4  | 0.70 | 0.64 | 0.69 | 0.64 | 1.13 | 1.23 | 0.81 | 1.16 | 457  | 51.1  | 9.00  |
| Q9UBF1 | Melanoma-associated antigen C2 OS=Homo sapiens<br>GN=MAGEC2 PE=1 SV=1 - [MAGC2_HUMAN]                                                  | 4.83  | 1 | 1  | 1  | 2  |      |      |      |      | 0.64 | 1.24 | 0.45 | 0.88 | 373  | 41.1  | 4.31  |
| Q9Y5V3 | Melanoma-associated antigen D1 OS=Homo sapiens<br>GN=MAGED1 PE=1 SV=3 - [MAGD1_HUMAN]                                                  | 6.68  | 1 | 2  | 2  | 3  |      |      |      |      | #### | ###  | ###  | #### | 778  | 86.1  | 5.83  |
| Q8TD90 | Melanoma-associated antigen E2 OS=Homo sapiens<br>GN=MAGEE2 PE=2 SV=1 - [MAGE2_HUMAN]                                                  | 2.29  | 1 | 1  | 1  | 1  |      |      |      |      | 1.33 | 1.35 | 1.26 | 1.28 | 523  | 60.3  | 5.10  |
| P15529 | Membrane cofactor protein OS=Homo sapiens GN=CD46<br>PE=1 SV=3 - [MCP_HUMAN]                                                           | 1.79  | 1 | 1  | 1  | 1  |      |      |      |      | 1.24 | 0.95 | 1.17 | 0.90 | 392  | 43.7  | 6.74  |
| Q495T6 | Membrane metallo-endopeptidase-like 1 OS=Homo sapiens<br>GN=MME11 PE=1 SV=2 - [MME11_HUMAN]                                            | 2.05  | 1 | 1  | 1  | 2  |      |      |      |      | 1.23 | 1.23 | 1.25 | 1.25 | 779  | 89.3  | 5.87  |
| Q16853 | Membrane primary amine oxidase OS=Homo sapiens<br>GN=AOC3 PE=1 SV=3 - [AOC3_HUMAN]                                                     | 17.96 | 2 | 10 | 10 | 26 | 0.58 | 0.62 | 0.67 | 0.68 |      |      |      |      | 763  | 84.6  | 6.52  |
| Q5TCQ9 | Membrane-associated guanylate kinase, WW and PDZ<br>domain-containing protein 3 OS=Homo sapiens GN=MAGI3<br>PE=1 SV=2 - [MAGI3_HUMAN]  | 1.33  | 1 | 1  | 1  | 1  |      |      |      |      | 1.65 | 1.66 | 1.29 | 1.30 | 1506 | 165.5 | 8.02  |
| Q9BZ71 | Membrane-associated phosphatidylinositol transfer protein 3<br>OS=Homo sapiens GN=PITPNM3 PE=1 SV=2 -<br>[PITM3_HUMAN]                 | 2.46  | 1 | 1  | 1  | 1  |      |      |      |      | 1.01 |      |      |      | 974  | 106.7 | 7.14  |
| Q99640 | Membrane-associated tyrosine- and threonine-specific cdc2-<br>inhibitory kinase OS=Homo sapiens GN=PKMYT1 PE=1 SV=1<br>- [PMYT1_HUMAN] | 2.40  | 1 | 1  | 1  | 1  |      |      |      |      | 1.13 | 1.40 | 1.00 | 1.24 | 499  | 54.5  | 6.93  |
| Q96JA4 | Membrane-spanning 4-domains subfamily A member 14<br>OS=Homo sapiens GN=MS4A14 PE=2 SV=2 -<br>[M4A14_HUMAN]                            | 4.86  | 1 | 2  | 2  | 11 | 0.46 | 0.32 | 0.63 | 0.45 | 0.63 | 0.44 | 0.61 | 0.43 | 679  | 76.5  | 5.60  |
| Q16820 | Meprin A subunit beta OS=Homo sapiens GN=MEP1B PE=1<br>SV=3 - [MEP1B_HUMAN]                                                            | 5.42  | 1 | 2  | 2  | 2  |      |      |      |      | 0.98 | 1.16 | 0.57 | 0.68 | 701  | 79.5  | 5.74  |
| P55145 | Mesencephalic astrocyte-derived neurotrophic factor<br>OS=Homo sapiens GN=MANF PE=1 SV=3 - [MANF_HUMAN]                                | 24.73 | 1 | 5  | 5  | 14 |      |      |      |      | 1.23 | 1.34 | 1.06 | 1.16 | 182  | 20.7  | 8.69  |
| Q7Z3K6 | Mesoderm induction early response protein 3 OS=Homo<br>sapiens GN=MIER3 PE=1 SV=2 - [MIER3_HUMAN]                                      | 6.00  | 1 | 1  | 1  | 1  | 1.54 | 0.95 | 0.93 | 0.58 |      |      |      |      | 550  | 61.4  | 4.51  |
| Q9BRJ9 | Mesoderm posterior protein 1 OS=Homo sapiens GN=MESP1<br>PE=2 SV=1 - [MESP1_HUMAN]                                                     | 13.06 | 1 | 1  | 1  | 1  |      |      |      |      | 0.71 |      |      |      | 268  | 28.5  | 8.90  |
| O15303 | Metabotropic glutamate receptor 6 OS=Homo sapiens<br>GN=GRM6 PE=1 SV=2 - [GRM6_HUMAN]                                                  | 1.03  | 1 | 1  | 1  | 1  |      |      |      |      | 0.17 | 0.27 | 0.76 | 1.17 | 877  | 95.4  | 8.02  |
| Q9NRU3 | Metal transporter CNNM1 OS=Homo sapiens GN=CNNM1<br>PE=2 SV=3 - [CNNM1_HUMAN]                                                          | 1.37  | 1 | 1  | 1  | 4  |      |      |      |      | 0.92 | 1.12 | 0.83 | 0.96 | 951  | 104.3 | 6.28  |
| Q8NE01 | Metal transporter CNNM3 OS=Homo sapiens GN=CNNM3<br>PE=1 SV=1 - [CNNM3_HUMAN]                                                          | 3.68  | 1 | 1  | 1  | 2  | 1.57 | 1.49 | 1.63 | 1.57 |      |      |      |      | 707  | 76.1  | 6.09  |
| Q6P4Q7 | Metal transporter CNNM4 OS=Homo sapiens GN=CNNM4<br>PE=1 SV=3 - [CNNM4_HUMAN]                                                          | 2.19  | 2 | 2  | 2  | 9  | 1.06 | 1.31 | 1.05 | 1.00 | 0.75 | 0.70 | 0.82 | 0.77 | 775  | 86.6  | 6.07  |
| P01033 | Metalloproteinase inhibitor 1 OS=Homo sapiens GN=TIMP1<br>PE=1 SV=1 - [TIMP1_HUMAN]                                                    | 18.84 | 1 | 4  | 4  | 19 | 1.23 | 1.22 | 1.17 | 1.18 | 1.21 | 1.37 | 1.21 | 1.39 | 207  | 23.2  | 8.10  |
| P16035 | Metalloproteinase inhibitor 2 OS=Homo sapiens GN=TIMP2<br>PE=1 SV=2 - [TIMP2_HUMAN]                                                    | 16.36 | 1 | 5  | 5  | 6  |      |      |      |      | 0.97 | 1.10 | 1.00 | 1.13 | 220  | 24.4  | 7.49  |
| P35625 | Metalloproteinase inhibitor 3 OS=Homo sapiens GN=TIMP3<br>PE=1 SV=2 - [TIMP3_HUMAN]                                                    | 10.90 | 1 | 3  | 3  | 7  |      |      |      |      | 1.44 | 1.44 | 1.39 | 1.41 | 211  | 24.1  | 8.72  |
| Q6ZN28 | Metastasis-associated in colon cancer protein 1 OS=Homo<br>sapiens GN=MACC1 PE=1 SV=2 - [MACC1_HUMAN]                                  | 1.17  | 1 | 1  | 1  | 1  |      |      |      |      | 0.43 | 0.39 | 0.88 | 0.81 | 852  | 96.6  | 6.90  |
| Q15726 | Metastasis-suppressor KiSS-1 OS=Homo sapiens GN=KISS1<br>PE=1 SV=4 - [KISS1_HUMAN]                                                     | 9.42  | 1 | 1  | 1  | 3  |      |      |      |      | 5.92 | 5.28 | 5.83 | 5.20 | 138  | 14.7  | 10.14 |

|        |                                                                                                               |       |   |    |    |    |      |      |      |      |      |      |      |      |      |      |       |       |
|--------|---------------------------------------------------------------------------------------------------------------|-------|---|----|----|----|------|------|------|------|------|------|------|------|------|------|-------|-------|
| Q5HY17 | Metaxin-3 OS=Homo sapiens GN=MTX3 PE=1 SV=2 - [MTX3_HUMAN]                                                    | 5.13  | 1 | 1  | 1  | 3  |      |      |      |      |      | 0.73 | 0.68 | 0.76 | 0.71 | 312  | 35.1  | 7.80  |
| P56192 | Methionine-tRNA ligase, cytoplasmic OS=Homo sapiens GN=MARS PE=1 SV=2 - [SYMC_HUMAN]                          | 0.78  | 1 | 1  | 1  | 1  | 0.74 | 0.74 | 0.66 | 0.67 |      |      |      |      |      | 900  | 101.1 | 6.16  |
| Q96DP5 | Methionyl-tRNA formyltransferase, mitochondrial OS=Homo sapiens GN=MTFMT PE=2 SV=2 - [FMT_HUMAN]              | 4.11  | 1 | 1  | 1  | 1  | 1.06 | 1.40 | 0.88 | 1.16 |      |      |      |      |      | 389  | 43.8  | 9.66  |
| Q9UBB5 | Methyl-CpG-binding domain protein 2 OS=Homo sapiens GN=MBD2 PE=1 SV=1 - [MBD2_HUMAN]                          | 9.98  | 1 | 1  | 1  | 1  | 0.96 | 0.66 |      |      |      |      |      |      |      | 411  | 43.2  | 10.04 |
| O95243 | Methyl-CpG-binding domain protein 4 OS=Homo sapiens GN=MBD4 PE=1 SV=1 - [MBD4_HUMAN]                          | 1.03  | 1 | 1  | 1  | 2  | 0.77 | 0.63 | 0.84 | 0.70 | 0.86 | 0.90 | 1.06 | 1.11 |      | 580  | 66.0  | 8.82  |
| P51608 | Methyl-CpG-binding protein 2 OS=Homo sapiens GN=MECP2 PE=1 SV=1 - [MECP2_HUMAN]                               | 5.14  | 1 | 1  | 2  | 2  | 1.06 | 1.09 | 1.04 | 1.06 |      |      |      |      |      | 486  | 52.4  | 9.95  |
| Q8NFU7 | Methylcytosine dioxygenase TET1 OS=Homo sapiens GN=TET1 PE=1 SV=2 - [TET1_HUMAN]                              | 0.42  | 1 | 1  | 1  | 1  |      | 1.16 | 1.10 |      |      |      |      |      |      | 2136 | 235.2 | 8.24  |
| Q6N021 | Methylcytosine dioxygenase TET2 OS=Homo sapiens GN=TET2 PE=1 SV=3 - [TET2_HUMAN]                              | 1.35  | 1 | 2  | 2  | 4  | 1.76 | 2.58 | 1.05 | 1.57 |      |      |      |      |      | 2002 | 223.7 | 7.99  |
| Q8N6R0 | Methyltransferase-like protein 13 OS=Homo sapiens GN=METTL13 PE=1 SV=1 - [MET13_HUMAN]                        | 1.00  | 1 | 1  | 1  | 1  | 4.64 | 5.68 | 3.49 | 4.28 |      |      |      |      |      | 699  | 78.7  | 6.73  |
| Q9BUU2 | Methyltransferase-like protein 22 OS=Homo sapiens GN=METTL22 PE=2 SV=2 - [MET22_HUMAN]                        | 4.70  | 1 | 1  | 1  | 1  |      |      |      |      | 0.87 | 1.10 | 0.68 | 0.87 |      | 404  | 44.5  | 5.07  |
| Q5JXM2 | Methyltransferase-like protein 24 OS=Homo sapiens GN=METTL24 PE=2 SV=1 - [MET24_HUMAN]                        | 12.84 | 1 | 2  | 2  | 2  | 0.85 | 1.22 | 0.70 | 1.01 | 1.15 | 1.39 | 1.09 | 1.31 |      | 366  | 41.3  | 9.26  |
| Q8N3J2 | Methyltransferase-like protein 4 OS=Homo sapiens GN=METTL4 PE=2 SV=3 - [METL4_HUMAN]                          | 3.81  | 1 | 1  | 1  | 1  |      |      |      |      | 1.09 | 1.33 | 1.11 | 1.35 |      | 472  | 54.0  | 6.86  |
| P22670 | MHC class II regulatory factor RFX1 OS=Homo sapiens GN=RFX1 PE=1 SV=2 - [RFX1_HUMAN]                          | 2.35  | 1 | 1  | 1  | 1  | 1.03 | 1.19 | 1.59 | 1.83 |      |      |      |      |      | 979  | 104.7 | 6.29  |
| Q6ZW33 | MICAL C-terminal-like protein OS=Homo sapiens GN=MICALCL PE=2 SV=3 - [MICKL_HUMAN]                            | 2.73  | 1 | 1  | 1  | 2  | 0.70 | 0.70 | 0.69 | 0.69 |      |      |      |      |      | 695  | 77.2  | 8.50  |
| Q8NEM0 | Microcephalin OS=Homo sapiens GN=MCPH1 PE=1 SV=3 - [MCPH1_HUMAN]                                              | 1.32  | 1 | 1  | 1  | 1  |      |      |      |      | 0.86 | 1.04 | 0.85 | 1.03 |      | 835  | 92.8  | 8.25  |
| Q13361 | Microfibrillar-associated protein 5 OS=Homo sapiens GN=MFAP5 PE=1 SV=1 - [MFAP5_HUMAN]                        | 5.20  | 1 | 1  | 1  | 1  |      |      |      |      | 1.31 | 1.48 | 1.21 | 1.36 |      | 173  | 19.6  | 5.94  |
| O75030 | Microphthalmia-associated transcription factor OS=Homo sapiens GN=MITF PE=1 SV=2 - [MITF_HUMAN]               | 1.71  | 1 | 1  | 1  | 1  | 0.62 | 0.64 | 0.61 | 0.64 |      |      |      |      |      | 526  | 58.8  | 6.33  |
| Q8WYQ5 | Microprocessor complex subunit DGCR8 OS=Homo sapiens GN=DGCR8 PE=1 SV=1 - [DGCR8_HUMAN]                       | 2.46  | 1 | 1  | 1  | 1  |      |      |      |      | 1.05 | 0.79 | 1.01 | 0.77 |      | 773  | 86.0  | 5.95  |
| Q9UPN3 | Microtubule-actin cross-linking factor 1, isoforms 1/2/3/5 OS=Homo sapiens GN=MACF1 PE=1 SV=4 - [MACF1_HUMAN] | 2.40  | 5 | 13 | 15 | 98 | 1.00 | 0.98 | 1.07 | 1.00 | 0.91 | 0.89 | 0.94 | 0.96 |      | 7388 | 837.8 | 5.39  |
| P46821 | Microtubule-associated protein 1B OS=Homo sapiens GN=MAP1B PE=1 SV=2 - [MAP1B_HUMAN]                          | 2.27  | 1 | 3  | 3  | 4  | 1.09 | 0.98 | 0.81 | 0.73 | 1.25 | 1.11 | 1.24 | 1.10 |      | 2468 | 270.5 | 4.81  |
| P11137 | Microtubule-associated protein 2 OS=Homo sapiens GN=MAP2 PE=1 SV=4 - [MAP2_HUMAN]                             | 1.70  | 1 | 2  | 2  | 2  | 1.15 | 1.21 | 1.17 | 1.23 | 0.39 | 0.88 | 0.49 | 1.12 |      | 1827 | 199.4 | 4.91  |
| P27816 | Microtubule-associated protein 4 OS=Homo sapiens GN=MAP4 PE=1 SV=3 - [MAP4_HUMAN]                             | 1.30  | 1 | 1  | 1  | 3  | 0.87 | 1.07 | 0.87 | 1.07 |      |      |      |      |      | 1152 | 120.9 | 5.43  |
| Q96JE9 | Microtubule-associated protein 6 OS=Homo sapiens GN=MAP6 PE=1 SV=2 - [MAP6_HUMAN]                             | 1.35  | 1 | 1  | 1  | 1  | 0.90 | 1.45 | 0.88 | 1.43 |      |      |      |      |      | 813  | 86.5  | 9.16  |
| Q49MG5 | Microtubule-associated protein 9 OS=Homo sapiens GN=MAP9 PE=1 SV=3 - [MAP9_HUMAN]                             | 3.55  | 1 | 1  | 1  | 1  | 0.68 | 0.63 | 0.90 | 0.83 |      |      |      |      |      | 647  | 74.2  | 7.80  |
| Q15691 | Microtubule-associated protein RP/EB family member 1 OS=Homo sapiens GN=MAPRE1 PE=1 SV=3 - [MARE1_HUMAN]      | 23.51 | 1 | 5  | 5  | 16 | 0.69 | 0.61 | 0.73 | 0.65 | 1.00 | 0.98 | 1.16 | 1.15 |      | 268  | 30.0  | 5.14  |
| Q15555 | Microtubule-associated protein RP/EB family member 2 OS=Homo sapiens GN=MAPRE2 PE=1 SV=1 - [MARE2_HUMAN]      | 11.62 | 1 | 3  | 3  | 14 | 0.88 | 0.74 | 0.88 | 0.74 | 1.82 | 1.68 | 1.66 | 1.44 |      | 327  | 37.0  | 5.57  |
| Q9Y2H9 | Microtubule-associated serine/threonine-protein kinase 1 OS=Homo sapiens GN=MAST1 PE=1 SV=2 - [MAST1_HUMAN]   | 0.64  | 1 | 1  | 1  | 1  |      |      |      |      | 1.90 | 2.97 | 1.18 | 1.84 |      | 1570 | 170.6 | 8.44  |



|        |                                                                                                                      |       |   |   |   |     |      |      |      |      |      |      |       |      |      |       |      |
|--------|----------------------------------------------------------------------------------------------------------------------|-------|---|---|---|-----|------|------|------|------|------|------|-------|------|------|-------|------|
| Q6P0Q8 | Microtubule-associated serine/threonine-protein kinase 2 OS=Homo sapiens GN=MAST2 PE=1 SV=2 - [MAST2_HUMAN]          | 1.39  | 1 | 2 | 2 | 4   | 1.07 | 1.11 | 1.08 | 1.13 |      | 1798 | 196.3 | 8.16 |      |       |      |
| O15021 | Microtubule-associated serine/threonine-protein kinase 4 OS=Homo sapiens GN=MAST4 PE=1 SV=3 - [MAST4_HUMAN]          | 0.76  | 1 | 1 | 1 | 1   |      |      |      |      | 0.72 | 0.66 | 0.87  | 0.80 | 2626 | 284.2 | 8.62 |
| Q9NU22 | Midasin OS=Homo sapiens GN=MDN1 PE=1 SV=2 - [MDN1_HUMAN]                                                             | 0.57  | 2 | 3 | 3 | 3   | 1.42 | 1.63 | 1.40 | 1.61 | 1.67 | 0.90 | 1.93  | 1.04 | 5596 | 632.4 | 5.68 |
| P21741 | Midkine OS=Homo sapiens GN=MDK PE=1 SV=1 - [MK_HUMAN]                                                                | 16.08 | 1 | 2 | 2 | 6   | 1.29 | 1.36 | 1.06 | 1.14 | 1.74 | 1.58 | 1.64  | 1.49 | 143  | 15.6  | 9.79 |
| P20774 | Mimecan OS=Homo sapiens GN=OGN PE=1 SV=1 - [MIME_HUMAN]                                                              | 11.74 | 1 | 2 | 2 | 8   | 0.94 | 0.91 | 0.93 | 0.92 | 0.82 | 0.83 | 0.72  | 0.72 | 298  | 33.9  | 5.63 |
| Q9BTE3 | Mini-chromosome maintenance complex-binding protein OS=Homo sapiens GN=MCMBP PE=1 SV=2 - [MCMBP_HUMAN]               | 1.25  | 1 | 1 | 1 | 3   |      |      |      |      | 3.18 | 2.95 | 3.09  | 2.86 | 642  | 72.9  | 5.87 |
| Q8TD10 | Mirror-image polydactyly gene 1 protein OS=Homo sapiens GN=MIPOL1 PE=2 SV=1 - [MIPO1_HUMAN]                          | 2.04  | 1 | 1 | 1 | 5   | 1.35 | 1.25 | 1.12 | 1.06 |      |      |       |      | 442  | 51.5  | 5.72 |
| P54278 | Mismatch repair endonuclease PMS2 OS=Homo sapiens GN=PMS2 PE=1 SV=2 - [PMS2_HUMAN]                                   | 2.67  | 1 | 1 | 1 | 1   | 0.22 | 0.17 | 0.57 | 0.44 |      |      |       |      | 862  | 95.7  | 6.86 |
| Q8WV92 | MIT domain-containing protein 1 OS=Homo sapiens GN=MITD1 PE=1 SV=1 - [MITD1_HUMAN]                                   | 5.22  | 1 | 1 | 1 | 1   | 0.99 | 0.94 | 0.91 | 0.87 |      |      |       |      | 249  | 29.3  | 8.00 |
| Q7Z434 | Mitochondrial antiviral-signaling protein OS=Homo sapiens GN=MAVS PE=1 SV=2 - [MAVS_HUMAN]                           | 1.67  | 1 | 1 | 1 | 2   |      |      |      |      | 1.28 | 1.26 | 1.23  | 1.21 | 540  | 56.5  | 5.52 |
| P25874 | Mitochondrial brown fat uncoupling protein 1 OS=Homo sapiens GN=UCP1 PE=1 SV=3 - [UCP1_HUMAN]                        | 2.28  | 1 | 1 | 1 | 1   | 0.38 | 0.37 | 0.50 | 0.49 |      |      |       |      | 307  | 33.0  | 9.09 |
| Q8N2A8 | Mitochondrial cardiolipin hydrolase OS=Homo sapiens GN=PLD6 PE=1 SV=1 - [PLD6_HUMAN]                                 | 11.51 | 1 | 3 | 3 | 8   | 1.05 | 1.15 | 1.06 | 1.08 | 0.83 | 0.85 | 0.99  | 0.98 | 252  | 28.3  | 9.35 |
| Q7L5Y1 | Mitochondrial enolase superfamily member 1 OS=Homo sapiens GN=ENOSF1 PE=1 SV=1 - [ENOF1_HUMAN]                       | 2.71  | 1 | 1 | 1 | 1   |      |      |      |      | 1.68 | 1.35 | 1.44  | 1.15 | 443  | 49.8  | 6.48 |
| Q9GZY8 | Mitochondrial fission factor OS=Homo sapiens GN=MFF PE=1 SV=1 - [MFF_HUMAN]                                          | 6.14  | 1 | 1 | 1 | 1   |      |      |      |      | 0.26 | 0.18 | 0.38  | 0.26 | 342  | 38.4  | 8.95 |
| Q9H1K4 | Mitochondrial glutamate carrier 2 OS=Homo sapiens GN=SLC25A18 PE=2 SV=1 - [GHC2_HUMAN]                               | 8.89  | 1 | 1 | 1 | 1   |      |      |      |      |      |      |       | 0.53 | 315  | 33.8  | 9.25 |
| Q9Y3D7 | Mitochondrial import inner membrane translocase subunit TIM16 OS=Homo sapiens GN=PAM16 PE=1 SV=2 - [TIM16_HUMAN]     | 6.40  | 1 | 1 | 1 | 1   |      |      |      |      | 0.66 | 0.73 | 0.65  | 0.73 | 125  | 13.8  | 9.70 |
| Q99595 | Mitochondrial import inner membrane translocase subunit Tim17-A OS=Homo sapiens GN=TIMM17A PE=1 SV=1 - [TI17A_HUMAN] | 16.96 | 1 | 1 | 1 | 1   |      |      |      |      | 1.44 | 1.48 | 1.13  | 1.17 | 171  | 18.0  | 7.87 |
| O60220 | Mitochondrial import inner membrane translocase subunit Tim8 A OS=Homo sapiens GN=TIMM8A PE=1 SV=1 - [TIM8A_HUMAN]   | 17.53 | 1 | 1 | 1 | 1   |      |      |      |      | 0.37 | 0.72 | 0.67  | 1.31 | 97   | 11.0  | 5.16 |
| Q969M1 | Mitochondrial import receptor subunit TOM40B OS=Homo sapiens GN=TOMM40L PE=2 SV=1 - [TM40L_HUMAN]                    | 5.19  | 1 | 1 | 1 | 2   | 1.06 | 1.01 | 1.02 | 0.99 |      |      |       |      | 308  | 33.9  | 7.24 |
| O94826 | Mitochondrial import receptor subunit TOM70 OS=Homo sapiens GN=TOMM70A PE=1 SV=1 - [TOM70_HUMAN]                     | 4.77  | 1 | 1 | 1 | 166 | 1.23 | 1.23 | 1.21 | 1.26 | 0.99 | 1.20 | 0.68  | 0.83 | 608  | 67.4  | 7.12 |
| Q10713 | Mitochondrial-processing peptidase subunit alpha OS=Homo sapiens GN=PMPCA PE=1 SV=2 - [MPPA_HUMAN]                   | 3.24  | 1 | 1 | 1 | 1   | 0.94 | 0.95 | 1.07 | 1.10 |      |      |       |      | 525  | 58.2  | 6.92 |
| Q8IWA4 | Mitofusin-1 OS=Homo sapiens GN=MFN1 PE=1 SV=2 - [MFN1_HUMAN]                                                         | 1.62  | 1 | 1 | 1 | 1   | 1.48 | 0.13 | 1.60 | 0.15 |      |      |       |      | 741  | 84.0  | 6.25 |
| O95140 | Mitofusin-2 OS=Homo sapiens GN=MFN2 PE=1 SV=3 - [MFN2_HUMAN]                                                         | 1.72  | 1 | 1 | 1 | 1   |      |      |      |      | 1.24 | 1.14 | 1.11  | 1.02 | 757  | 86.3  | 6.98 |
| O15264 | Mitogen-activated protein kinase 13 OS=Homo sapiens GN=MAPK13 PE=1 SV=1 - [MK13_HUMAN]                               | 3.29  | 1 | 1 | 1 | 28  | 0.62 | 0.62 | 0.65 | 0.66 | 0.40 | 0.80 | 0.88  | 1.77 | 365  | 42.1  | 8.38 |
| P27361 | Mitogen-activated protein kinase 3 OS=Homo sapiens GN=MAPK3 PE=1 SV=4 - [MK03_HUMAN]                                 | 2.37  | 1 | 1 | 1 | 2   | 0.63 | 0.59 | 0.67 | 0.62 |      |      |       |      | 379  | 43.1  | 6.74 |
| P45983 | Mitogen-activated protein kinase 8 OS=Homo sapiens GN=MAPK8 PE=1 SV=2 - [MK08_HUMAN]                                 | 3.04  | 2 | 1 | 1 | 1   |      |      |      |      | 1.14 | 1.91 |       |      | 427  | 48.3  | 6.89 |
| P45984 | Mitogen-activated protein kinase 9 OS=Homo sapiens GN=MAPK9 PE=1 SV=2 - [MK09_HUMAN]                                 | 3.77  | 1 | 1 | 1 | 1   |      |      |      |      | 1.54 | 1.30 | 1.39  | 1.17 | 424  | 48.1  | 5.63 |

|        |                                                                                                        |       |   |    |    |     |      |      |      |      |      |      |       |      |       |       |      |
|--------|--------------------------------------------------------------------------------------------------------|-------|---|----|----|-----|------|------|------|------|------|------|-------|------|-------|-------|------|
| Q99558 | Mitogen-activated protein kinase kinase kinase 14 OS=Homo sapiens GN=MAP3K14 PE=1 SV=2 - [M3K14_HUMAN] | 3.91  | 1 | 2  | 2  | 3   | 1.07 | 1.15 | 1.07 | 1.16 |      | 947  | 104.0 | 7.72 |       |       |      |
| Q6ZN16 | Mitogen-activated protein kinase kinase kinase 15 OS=Homo sapiens GN=MAP3K15 PE=1 SV=2 - [M3K15_HUMAN] | 2.82  | 1 | 1  | 1  | 1   |      |      |      | 0.83 | 0.53 | 1.14 | 0.73  | 1313 | 147.3 | 5.63  |      |
| Q99759 | Mitogen-activated protein kinase kinase kinase 3 OS=Homo sapiens GN=MAP3K3 PE=1 SV=2 - [M3K3_HUMAN]    | 2.08  | 1 | 1  | 1  | 1   | 1.01 | 1.27 | 1.02 | 1.30 |      | 626  | 70.9  | 8.84 |       |       |      |
| Q9Y6R4 | Mitogen-activated protein kinase kinase kinase 4 OS=Homo sapiens GN=MAP3K4 PE=1 SV=2 - [M3K4_HUMAN]    | 1.31  | 1 | 1  | 1  | 2   | 1.24 | 2.81 | 6.13 | #### |      | 1608 | 181.6 | 6.32 |       |       |      |
| Q99683 | Mitogen-activated protein kinase kinase kinase 5 OS=Homo sapiens GN=MAP3K5 PE=1 SV=1 - [M3K5_HUMAN]    | 1.82  | 1 | 1  | 1  | 1   | 2.58 | 1.22 | 1.79 | 0.85 |      | 1374 | 154.4 | 5.78 |       |       |      |
| O95382 | Mitogen-activated protein kinase kinase kinase 6 OS=Homo sapiens GN=MAP3K6 PE=1 SV=3 - [M3K6_HUMAN]    | 1.86  | 1 | 1  | 1  | 1   | 0.95 | 0.90 | 1.00 | 0.95 |      | 1288 | 142.5 | 7.11 |       |       |      |
| O43318 | Mitogen-activated protein kinase kinase kinase 7 OS=Homo sapiens GN=MAP3K7 PE=1 SV=1 - [M3K7_HUMAN]    | 1.98  | 1 | 1  | 1  | 2   |      |      |      | 1.35 | 1.11 | 1.36 | 1.12  | 606  | 67.2  | 7.11  |      |
| P41279 | Mitogen-activated protein kinase kinase kinase 8 OS=Homo sapiens GN=MAP3K8 PE=1 SV=2 - [M3K8_HUMAN]    | 3.43  | 1 | 1  | 1  | 1   |      |      |      | 2.56 | 2.19 | 2.63 | 2.25  | 467  | 52.9  | 5.81  |      |
| Q12851 | Mitogen-activated protein kinase kinase kinase 2 OS=Homo sapiens GN=MAP4K2 PE=1 SV=2 - [M4K2_HUMAN]    | 5.24  | 1 | 2  | 2  | 2   | 1.31 | 1.00 | 1.40 | 1.08 | 0.93 | 1.13 | 1.10  | 1.34 | 820   | 91.5  | 6.34 |
| Q5TCX8 | Mitogen-activated protein kinase kinase kinase MLK4 OS=Homo sapiens GN=MLK4 PE=1 SV=1 - [M3KL4_HUMAN]  | 4.44  | 2 | 2  | 2  | 2   | 0.55 | 0.17 | 0.75 | 0.24 |      | 1036 | 113.9 | 8.73 |       |       |      |
| Q9Y6D9 | Mitotic spindle assembly checkpoint protein MAD1 OS=Homo sapiens GN=MAD1L1 PE=1 SV=2 - [MD1L1_HUMAN]   | 1.67  | 1 | 1  | 1  | 1   | 1.18 | 1.61 | 1.13 | 1.55 |      | 718  | 83.0  | 5.92 |       |       |      |
| Q6NZ67 | Mitotic-spindle organizing protein 2B OS=Homo sapiens GN=MZT2B PE=1 SV=1 - [MZT2B_HUMAN]               | 4.43  | 1 | 1  | 1  | 2   |      |      |      | 0.44 | 0.68 | 0.81 | 1.27  | 158  | 16.2  | 10.15 |      |
| Q9ULH7 | MKL/myocardin-like protein 2 OS=Homo sapiens GN=MKL2 PE=1 SV=3 - [MKL2_HUMAN]                          | 1.10  | 1 | 1  | 1  | 1   |      |      |      | 1.50 | 1.66 | 1.47 | 1.62  | 1088 | 118.1 | 6.28  |      |
| Q96T76 | MMS19 nucleotide excision repair protein homolog OS=Homo sapiens GN=MMS19 PE=1 SV=2 - [MMS19_HUMAN]    | 1.17  | 1 | 1  | 1  | 1   | 1.25 | 1.56 | 1.22 | 1.54 |      | 1030 | 113.2 | 6.35 |       |       |      |
| Q7L9L4 | MOB kinase activator 1B OS=Homo sapiens GN=MOB1B PE=1 SV=3 - [MOB1B_HUMAN]                             | 5.09  | 2 | 1  | 1  | 1   | 1.13 | 1.25 | 1.15 | 1.28 |      | 216  | 25.1  | 6.73 |       |       |      |
| P26038 | Moesin OS=Homo sapiens GN=MSN PE=1 SV=3 - [MOES_HUMAN]                                                 | 15.25 | 3 | 10 | 10 | 38  | 0.78 | 0.75 | 0.79 | 0.79 | 1.09 | 1.16 | 1.06  | 1.06 | 577   | 67.8  | 6.40 |
| Q9NZB8 | Molybdenum cofactor biosynthesis protein 1 OS=Homo sapiens GN=MOCS1 PE=1 SV=3 - [MOCS1_HUMAN]          | 2.36  | 1 | 1  | 1  | 1   |      |      |      | 0.81 | 2.07 | 0.82 | 2.10  | 636  | 70.1  | 9.26  |      |
| Q9BV23 | Monoacylglycerol lipase ABHD6 OS=Homo sapiens GN=ABHD6 PE=2 SV=1 - [ABHD6_HUMAN]                       | 7.72  | 1 | 2  | 2  | 5   | 1.22 | 1.39 | 1.33 | 1.53 | 3.64 | 4.16 | 3.00  | 3.42 | 337   | 38.3  | 8.41 |
| P53985 | Monocarboxylate transporter 1 OS=Homo sapiens GN=SLC16A1 PE=1 SV=3 - [MOT1_HUMAN]                      | 4.20  | 1 | 1  | 1  | 1   |      |      |      | 0.88 | 0.54 | 1.57 | 0.97  | 500  | 53.9  | 8.66  |      |
| O60669 | Monocarboxylate transporter 2 OS=Homo sapiens GN=SLC16A7 PE=2 SV=2 - [MOT2_HUMAN]                      | 3.14  | 1 | 1  | 1  | 1   | 0.94 | 0.83 | 0.91 | 0.81 |      | 478  | 52.2  | 9.31 |       |       |      |
| O95907 | Monocarboxylate transporter 3 OS=Homo sapiens GN=SLC16A8 PE=2 SV=1 - [MOT3_HUMAN]                      | 2.38  | 1 | 1  | 2  | 10  |      |      |      | 0.55 | 0.34 | 2.21 | 1.36  | 504  | 52.3  | 5.67  |      |
| O15375 | Monocarboxylate transporter 6 OS=Homo sapiens GN=SLC16A5 PE=2 SV=1 - [MOT6_HUMAN]                      | 1.98  | 1 | 1  | 1  | 1   |      |      |      | 0.95 | 1.01 | 0.82 | 0.87  | 505  | 55.0  | 8.22  |      |
| O15403 | Monocarboxylate transporter 7 OS=Homo sapiens GN=SLC16A6 PE=1 SV=2 - [MOT7_HUMAN]                      | 2.29  | 1 | 2  | 2  | 6   |      |      |      | 1.07 | 0.82 | 0.58 | 0.43  | 523  | 57.4  | 7.81  |      |
| P08571 | Monocyte differentiation antigen CD14 OS=Homo sapiens GN=CD14 PE=1 SV=2 - [CD14_HUMAN]                 | 43.20 | 1 | 13 | 13 | 139 | 1.07 | 1.12 | 1.03 | 1.08 | 0.93 | 1.10 | 0.98  | 0.97 | 375   | 40.1  | 6.23 |
| Q99685 | Monoglyceride lipase OS=Homo sapiens GN=MGLL PE=1 SV=2 - [MGLL_HUMAN]                                  | 4.62  | 1 | 1  | 1  | 2   | 0.43 | 0.47 | 0.44 | 0.48 |      | 303  | 33.2  | 6.99 |       |       |      |
| Q9UBU8 | Mortality factor 4-like protein 1 OS=Homo sapiens GN=MORF4L1 PE=1 SV=2 - [MO4L1_HUMAN]                 | 2.21  | 1 | 1  | 1  | 1   |      |      |      | 0.53 | 0.61 | 0.50 | 0.58  | 362  | 41.4  | 9.28  |      |
| Q969Z3 | MOSC domain-containing protein 2, mitochondrial OS=Homo sapiens GN=MARC2 PE=1 SV=1 - [MOSC2_HUMAN]     | 4.18  | 1 | 1  | 1  | 2   |      |      |      | 1.03 | 0.32 | 1.08 | 0.33  | 335  | 38.0  | 9.16  |      |

|        |                                                                                                            |       |    |    |    |    |      |      |      |      |      |      |      |      |       |       |      |       |      |
|--------|------------------------------------------------------------------------------------------------------------|-------|----|----|----|----|------|------|------|------|------|------|------|------|-------|-------|------|-------|------|
| Q15797 | Mothers against decapentaplegic homolog 1 OS=Homo sapiens GN=SMAD1 PE=1 SV=1 - [SMAD1_HUMAN]               | 3.23  | 1  | 1  | 1  | 10 |      |      |      |      |      |      | 0.91 | 0.92 | 0.93  | 0.99  | 465  | 52.2  | 7.31 |
| Q13485 | Mothers against decapentaplegic homolog 4 OS=Homo sapiens GN=SMAD4 PE=1 SV=1 - [SMAD4_HUMAN]               | 3.44  | 1  | 1  | 1  | 1  | 1.03 | 1.22 | 1.38 | 1.65 |      |      |      |      |       |       | 552  | 60.4  | 6.99 |
| O43541 | Mothers against decapentaplegic homolog 6 OS=Homo sapiens GN=SMAD6 PE=1 SV=2 - [SMAD6_HUMAN]               | 1.61  | 1  | 1  | 1  | 1  | 1.03 | 1.30 | 0.96 | 1.22 |      |      |      |      |       |       | 496  | 53.5  | 8.10 |
| Q8N594 | MPN domain-containing protein OS=Homo sapiens GN=MPND PE=1 SV=1 - [MPND_HUMAN]                             | 3.40  | 1  | 1  | 1  | 1  | 0.96 | 0.94 | 0.89 | 0.87 |      |      |      |      |       |       | 471  | 50.6  | 5.72 |
| Q9NPI6 | mRNA-decapping enzyme 1A OS=Homo sapiens GN=DCP1A PE=1 SV=2 - [DCP1A_HUMAN]                                | 4.47  | 1  | 1  | 1  | 1  | 0.67 | 0.41 | 0.65 | 0.40 |      |      |      |      |       |       | 582  | 63.3  | 6.25 |
| Q96T58 | Msx2-interacting protein OS=Homo sapiens GN=SPEN PE=1 SV=1 - [MINT_HUMAN]                                  | 1.86  | 16 | 3  | 6  | 14 | 0.72 | 0.60 | 0.70 | 0.60 | 0.61 | 0.42 | 0.72 | 0.50 | 3664  | 402.0 | 7.64 |       |      |
| Q765P7 | MTSS1-like protein OS=Homo sapiens GN=MTSS1L PE=1 SV=1 - [MTSSL_HUMAN]                                     | 3.35  | 9  | 1  | 2  | 2  |      |      |      |      |      |      | 2.08 | 2.27 | 1.83  | 1.99  | 747  | 79.9  | 7.47 |
| Q9UKN1 | Mucin-12 OS=Homo sapiens GN=MUC12 PE=1 SV=2 - [MUC12_HUMAN]                                                | 0.75  | 1  | 1  | 1  | 1  | 0.81 | 0.87 | 0.92 | 0.99 |      |      |      |      |       |       | 5478 | 557.8 | 5.55 |
| Q8WXI7 | Mucin-16 OS=Homo sapiens GN=MUC16 PE=1 SV=2 - [MUC16_HUMAN]                                                | 1.00  | 1  | 9  | 9  | 31 | 1.17 | 1.05 | 1.18 | 1.08 | 1.03 | 1.02 | 1.12 | 1.10 | 22152 | ##### | 6.00 |       |      |
| Q685J3 | Mucin-17 OS=Homo sapiens GN=MUC17 PE=1 SV=2 - [MUC17_HUMAN]                                                | 0.45  | 1  | 1  | 1  | 2  | 0.94 | 1.67 | 1.08 | 1.93 |      |      |      |      |       |       | 4493 | 451.5 | 4.11 |
| Q7Z5P9 | Mucin-19 OS=Homo sapiens GN=MUC19 PE=1 SV=2 - [MUC19_HUMAN]                                                | 0.14  | 1  | 1  | 1  | 1  |      |      |      |      |      |      | 1.01 | 1.06 | 1.02  | 1.08  | 6254 | 597.8 | 5.00 |
| Q02817 | Mucin-2 OS=Homo sapiens GN=MUC2 PE=1 SV=2 - [MUC2_HUMAN]                                                   | 0.21  | 1  | 1  | 1  | 1  |      |      |      |      |      |      | 0.91 | 1.26 | 1.06  | 1.46  | 5179 | 540.0 | 5.80 |
| Q5SSG8 | Mucin-21 OS=Homo sapiens GN=MUC21 PE=1 SV=2 - [MUC21_HUMAN]                                                | 3.00  | 1  | 1  | 1  | 1  |      |      |      |      |      |      | 0.90 | 0.40 | 0.82  | 0.36  | 566  | 54.2  | 4.81 |
| E2RYF6 | Mucin-22 OS=Homo sapiens GN=MUC22 PE=1 SV=1 - [MUC22_HUMAN]                                                | 4.29  | 1  | 2  | 2  | 3  | 0.66 | 0.81 | 0.75 | 0.97 |      |      |      |      |       |       | 1773 | 173.4 | 3.90 |
| Q9HC84 | Mucin-5B OS=Homo sapiens GN=MUC5B PE=1 SV=3 - [MUC5B_HUMAN]                                                | 0.33  | 1  | 1  | 1  | 1  |      |      |      |      |      |      | 0.92 | 0.81 | 1.05  | 0.92  | 5762 | 596.0 | 6.64 |
| Q6W4X9 | Mucin-6 OS=Homo sapiens GN=MUC6 PE=1 SV=3 - [MUC6_HUMAN]                                                   | 0.62  | 1  | 1  | 1  | 7  |      |      |      |      |      |      | 1.08 | 1.39 | 1.32  | 1.73  | 2439 | 256.9 | 7.39 |
| Q13477 | Mucosal addressin cell adhesion molecule 1 OS=Homo sapiens GN=MADCAM1 PE=1 SV=2 - [MADCA_HUMAN]            | 9.42  | 1  | 3  | 3  | 5  | 1.42 | 1.33 | 1.40 | 1.31 | 1.37 | 1.51 | 1.36 | 1.49 | 382   | 40.1  | 5.12 |       |      |
| P21439 | Multidrug resistance protein 3 OS=Homo sapiens GN=ABCB4 PE=1 SV=2 - [MDR3_HUMAN]                           | 4.35  | 2  | 2  | 3  | 25 |      |      |      |      |      |      | 1.19 | 1.07 | 1.08  | 1.00  | 1286 | 141.4 | 8.48 |
| P33527 | Multidrug resistance-associated protein 1 OS=Homo sapiens GN=ABCC1 PE=1 SV=3 - [MRP1_HUMAN]                | 0.98  | 1  | 1  | 1  | 1  | 1.23 | 0.84 | 0.99 | 0.69 |      |      |      |      |       |       | 1531 | 171.5 | 7.11 |
| O95255 | Multidrug resistance-associated protein 6 OS=Homo sapiens GN=ABCC6 PE=1 SV=2 - [MRP6_HUMAN]                | 0.60  | 1  | 1  | 1  | 1  |      |      |      |      |      |      | 1.26 | 1.19 | 1.35  | 1.28  | 1503 | 164.8 | 8.50 |
| Q13201 | Multimerin-1 OS=Homo sapiens GN=MMRN1 PE=1 SV=3 - [MMRN1_HUMAN]                                            | 26.14 | 1  | 23 | 24 | 63 | 1.25 | 1.15 | 1.29 | 1.17 | 1.04 | 1.07 | 0.94 | 0.98 | 1228  | 138.0 | 7.93 |       |      |
| Q9H8L6 | Multimerin-2 OS=Homo sapiens GN=MMRN2 PE=1 SV=2 - [MMRN2_HUMAN]                                            | 7.59  | 1  | 5  | 5  | 26 | 1.23 | 1.14 | 1.44 | 1.37 | 1.03 | 1.05 | 0.98 | 1.01 | 949   | 104.3 | 5.86 |       |      |
| Q7Z7M0 | Multiple epidermal growth factor-like domains protein 8 OS=Homo sapiens GN=MEGF8 PE=1 SV=2 - [MEGF8_HUMAN] | 6.82  | 1  | 15 | 15 | 21 | 1.08 | 1.15 | 0.98 | 1.05 | 0.71 | 0.84 | 0.91 | 1.08 | 2845  | 302.9 | 6.87 |       |      |
| Q9H1U4 | Multiple epidermal growth factor-like domains protein 9 OS=Homo sapiens GN=MEGF9 PE=2 SV=3 - [MEGF9_HUMAN] | 1.83  | 1  | 1  | 1  | 1  |      |      |      |      |      |      | 0.83 | 0.83 | 0.77  | 0.78  | 602  | 62.9  | 5.67 |
| Q9UNW1 | Multiple inositol polyphosphate phosphatase 1 OS=Homo sapiens GN=MINPP1 PE=1 SV=1 - [MINP1_HUMAN]          | 14.58 | 1  | 6  | 6  | 34 | 0.97 | 0.92 | 0.98 | 0.94 | 1.09 | 1.03 | 1.05 | 0.98 | 487   | 55.0  | 7.81 |       |      |
| Q9H7P6 | Multivesicular body subunit 12B OS=Homo sapiens GN=FAM125B PE=1 SV=2 - [F125B_HUMAN]                       | 2.19  | 1  | 1  | 1  | 1  | 0.98 | 0.99 | 0.77 | 0.78 |      |      |      |      |       |       | 319  | 35.6  | 8.15 |
| P11229 | Muscarinic acetylcholine receptor M1 OS=Homo sapiens GN=CHRM1 PE=1 SV=2 - [ACM1_HUMAN]                     | 3.26  | 1  | 1  | 1  | 2  |      |      |      |      |      |      | 2.56 | 2.66 | 2.39  | 2.47  | 460  | 51.4  | 9.32 |

|        |                                                                                                           |       |   |    |    |     |      |      |      |      |      |      |       |      |      |       |      |
|--------|-----------------------------------------------------------------------------------------------------------|-------|---|----|----|-----|------|------|------|------|------|------|-------|------|------|-------|------|
| P08912 | Muscarinic acetylcholine receptor M5 OS=Homo sapiens GN=CHRM5 PE=2 SV=2 - [ACM5_HUMAN]                    | 2.26  | 1 | 1  | 1  | 1   |      | 1.16 | 1.17 | 1.27 | 1.29 | 532  | 60.0  | 9.28 |      |       |      |
| O15146 | Muscle, skeletal receptor tyrosine-protein kinase OS=Homo sapiens GN=MUSK PE=1 SV=1 - [MUSK_HUMAN]        | 6.67  | 1 | 3  | 3  | 106 | 0.91 | 0.95 | 0.76 | 0.83 | 0.77 | 0.16 | 0.97  | 0.40 | 869  | 97.0  | 7.23 |
| Q9NR56 | Muscleblind-like protein 1 OS=Homo sapiens GN=MBNL1 PE=1 SV=2 - [MBNL1_HUMAN]                             | 4.64  | 3 | 2  | 2  | 5   |      | 1.56 | 1.47 | 1.36 | 1.28 | 388  | 41.8  | 8.90 |      |       |      |
| O60682 | Musculin OS=Homo sapiens GN=MSC PE=1 SV=2 - [MUSC_HUMAN]                                                  | 9.22  | 1 | 1  | 1  | 1   | 0.89 | 0.93 | 0.95 | 1.00 |      | 206  | 22.1  | 9.09 |      |       |      |
| Q9UL63 | Muskelin OS=Homo sapiens GN=MKLN1 PE=1 SV=2 - [MKLN1_HUMAN]                                               | 3.67  | 1 | 2  | 2  | 2   | 0.25 | 0.24 | 0.23 | 0.23 |      | 735  | 84.7  | 6.34 |      |       |      |
| O15457 | MutS protein homolog 4 OS=Homo sapiens GN=MSH4 PE=2 SV=2 - [MSH4_HUMAN]                                   | 2.24  | 1 | 1  | 1  | 2   |      | 1.38 | 3.06 | 1.10 | 2.44 | 936  | 104.7 | 7.37 |      |       |      |
| O43196 | MutS protein homolog 5 OS=Homo sapiens GN=MSH5 PE=1 SV=1 - [MSH5_HUMAN]                                   | 3.60  | 1 | 2  | 2  | 4   |      | 0.30 | 0.20 | 0.62 | 0.40 | 834  | 92.8  | 6.37 |      |       |      |
| Q9BQG0 | Myb-binding protein 1A OS=Homo sapiens GN=MYBBP1A PE=1 SV=2 - [MBB1A_HUMAN]                               | 2.41  | 2 | 3  | 3  | 10  | 1.30 | 1.26 | 1.46 | 1.42 | 1.88 | 1.07 | 2.33  | 1.32 | 1328 | 148.8 | 9.28 |
| Q6ZT21 | Myb/SANT-like DNA-binding domain-containing protein 1 OS=Homo sapiens GN=MSANTD1 PE=2 SV=2 - [MSD1_HUMAN] | 2.52  | 1 | 1  | 1  | 2   |      | 1.15 | 0.94 | 1.09 | 0.89 | 278  | 31.6  | 8.82 |      |       |      |
| Q6P1R3 | Myb/SANT-like DNA-binding domain-containing protein 2 OS=Homo sapiens GN=MSANTD2 PE=1 SV=1 - [MSD2_HUMAN] | 2.50  | 1 | 1  | 1  | 1   |      | 0.92 | 0.91 | 0.89 | 0.88 | 559  | 61.3  | 6.19 |      |       |      |
| P01106 | Myc proto-oncogene protein OS=Homo sapiens GN=MYC PE=1 SV=1 - [MYC_HUMAN]                                 | 6.15  | 1 | 1  | 2  | 3   | 1.02 | 0.89 | 0.78 | 0.69 |      | 439  | 48.8  | 5.49 |      |       |      |
| Q8N699 | Myc target protein 1 OS=Homo sapiens GN=MYCT1 PE=2 SV=1 - [MYCT1_HUMAN]                                   | 5.11  | 1 | 1  | 1  | 2   | 0.57 | 0.55 | 0.60 | 0.57 |      | 235  | 26.6  | 9.83 |      |       |      |
| Q9Y2G1 | Myelin gene regulatory factor OS=Homo sapiens GN=MRF PE=1 SV=3 - [MRF_HUMAN]                              | 3.30  | 1 | 2  | 2  | 5   | 1.23 | 1.14 | 1.29 | 1.21 |      | 1151 | 124.3 | 7.44 |      |       |      |
| P25189 | Myelin protein P0 OS=Homo sapiens GN=MPZ PE=1 SV=1 - [MYP0_HUMAN]                                         | 2.82  | 1 | 1  | 1  | 1   | 0.76 | 0.85 | 0.73 | 0.81 |      | 248  | 27.5  | 9.54 |      |       |      |
| Q6UWV2 | Myelin protein zero-like protein 3 OS=Homo sapiens GN=MPZL3 PE=1 SV=1 - [MPZL3_HUMAN]                     | 5.53  | 1 | 1  | 1  | 1   |      | 0.85 | 0.82 | 0.71 | 0.69 | 235  | 26.0  | 7.94 |      |       |      |
| Q9UL68 | Myelin transcription factor 1-like protein OS=Homo sapiens GN=MYT1L PE=2 SV=3 - [MYT1L_HUMAN]             | 3.71  | 1 | 2  | 2  | 4   | 0.85 | 0.88 | 0.81 | 0.85 |      | 1186 | 133.0 | 4.97 |      |       |      |
| P24158 | Myeloblastin OS=Homo sapiens GN=PRTN3 PE=1 SV=3 - [PRTN3_HUMAN]                                           | 7.81  | 1 | 2  | 2  | 13  | 1.95 | 2.61 | 1.96 | 2.67 | 0.97 | 0.82 | 0.89  | 0.75 | 256  | 27.8  | 8.35 |
| P41218 | Myeloid cell nuclear differentiation antigen OS=Homo sapiens GN=MNDA PE=1 SV=1 - [MNDA_HUMAN]             | 2.95  | 9 | 1  | 2  | 4   |      | 1.17 | 1.12 | 1.46 | 1.39 | 407  | 45.8  | 9.76 |      |       |      |
| P20138 | Myeloid cell surface antigen CD33 OS=Homo sapiens GN=CD33 PE=1 SV=2 - [CD33_HUMAN]                        | 3.57  | 1 | 1  | 1  | 2   | 0.79 | 0.80 | 0.75 | 0.77 |      | 364  | 39.8  | 8.38 |      |       |      |
| Q99836 | Myeloid differentiation primary response protein MyD88 OS=Homo sapiens GN=MYD88 PE=1 SV=1 - [MYD88_HUMAN] | 1.69  | 1 | 1  | 1  | 1   | 1.91 | 2.35 | 1.45 | 1.78 |      | 296  | 33.2  | 6.15 |      |       |      |
| P05164 | Myeloperoxidase OS=Homo sapiens GN=MPO PE=1 SV=1 - [PERM_HUMAN]                                           | 25.37 | 1 | 18 | 19 | 77  | 1.05 | 1.04 | 1.02 | 1.00 | 1.42 | 1.45 | 1.42  | 1.47 | 745  | 83.8  | 8.97 |
| P0CAP1 | Mycocardial zonula adherens protein OS=Homo sapiens GN=MYZAP PE=1 SV=1 - [MYZAP_HUMAN]                    | 3.65  | 1 | 1  | 1  | 1   | 1.27 | 0.74 | 0.97 | 0.57 |      | 466  | 54.2  | 6.18 |      |       |      |
| Q99972 | Myocilin OS=Homo sapiens GN=MYOC PE=1 SV=2 - [MYOC_HUMAN]                                                 | 4.76  | 1 | 2  | 2  | 4   |      | 1.23 | 0.77 | 1.12 | 0.70 | 504  | 56.9  | 5.54 |      |       |      |
| Q06413 | Myocyte-specific enhancer factor 2C OS=Homo sapiens GN=MEF2C PE=1 SV=1 - [MEF2C_HUMAN]                    | 1.48  | 1 | 1  | 1  | 1   |      | 1.10 | 0.41 | 1.79 | 0.67 | 473  | 51.2  | 8.03 |      |       |      |
| Q9NZM1 | Myoferlin OS=Homo sapiens GN=MYOF PE=1 SV=1 - [MYOF_HUMAN]                                                | 1.26  | 1 | 2  | 2  | 5   |      | 0.83 | 0.79 | 0.76 | 0.72 | 2061 | 234.6 | 6.18 |      |       |      |
| Q5VU43 | Myomegalin OS=Homo sapiens GN=PDE4DIP PE=2 SV=1 - [MYOME_HUMAN]                                           | 2.22  | 1 | 3  | 4  | 4   | 1.34 | 1.16 | 1.28 | 1.12 |      | 2346 | 264.9 | 5.44 |      |       |      |
| P52179 | Myomesin-1 OS=Homo sapiens GN=MYOM1 PE=1 SV=2 - [MYOM1_HUMAN]                                             | 1.36  | 1 | 1  | 1  | 2   |      | 0.86 | 0.89 | 0.77 | 0.79 | 1685 | 187.5 | 6.93 |      |       |      |

|        |                                                                                                                 |       |   |    |    |     |      |      |      |      |      |      |      |      |      |       |      |      |       |      |
|--------|-----------------------------------------------------------------------------------------------------------------|-------|---|----|----|-----|------|------|------|------|------|------|------|------|------|-------|------|------|-------|------|
| Q9H1R3 | Myosin light chain kinase 2, skeletal/cardiac muscle OS=Homo sapiens GN=MYLK2 PE=1 SV=3 - [MYLK2_HUMAN]         | 2.01  | 1 | 1  | 1  | 2   |      |      |      |      |      |      |      | 0.69 | 0.57 | 1.01  | 0.82 | 596  | 64.6  | 7.02 |
| Q15746 | Myosin light chain kinase, smooth muscle OS=Homo sapiens GN=MYLK PE=1 SV=4 - [MYLK_HUMAN]                       | 1.31  | 1 | 2  | 2  | 8   |      |      |      |      |      |      |      | 1.42 | 1.47 | 1.33  | 1.38 | 1914 | 210.6 | 6.15 |
| P60660 | Myosin light polypeptide 6 OS=Homo sapiens GN=MYL6 PE=1 SV=2 - [MYL6_HUMAN]                                     | 39.74 | 4 | 6  | 6  | 31  | 0.54 | 0.49 | 0.51 | 0.47 | 0.44 | 0.40 | 0.48 | 0.44 | 151  | 16.9  | 4.65 |      |       |      |
| Q6WCQ1 | Myosin phosphatase Rho-interacting protein OS=Homo sapiens GN=MPRIP PE=1 SV=3 - [MPRIP_HUMAN]                   | 0.98  | 1 | 1  | 1  | 2   |      |      |      |      |      |      |      | 1.11 | 1.07 | 0.84  | 0.81 | 1025 | 116.5 | 6.21 |
| P24844 | Myosin regulatory light polypeptide 9 OS=Homo sapiens GN=MYL9 PE=1 SV=4 - [MYL9_HUMAN]                          | 44.77 | 3 | 5  | 5  | 25  | 0.39 | 0.47 | 0.64 | 0.64 | 0.44 | 0.42 | 0.48 | 0.53 | 172  | 19.8  | 4.92 |      |       |      |
| P12882 | Myosin-1 OS=Homo sapiens GN=MYH1 PE=1 SV=3 - [MYH1_HUMAN]                                                       | 2.53  | 2 | 1  | 4  | 13  | 1.21 | 1.34 | 1.25 | 1.39 |      |      |      |      |      |       |      | 1939 | 223.0 | 5.74 |
| P35749 | Myosin-11 OS=Homo sapiens GN=MYH11 PE=1 SV=3 - [MYH11_HUMAN]                                                    | 4.97  | 1 | 2  | 8  | 23  | 0.67 | 0.80 | 0.71 | 0.86 | 1.19 | 1.20 | 1.44 | 1.45 | 1972 | 227.2 | 5.50 |      |       |      |
| Q9UKX3 | Myosin-13 OS=Homo sapiens GN=MYH13 PE=1 SV=2 - [MYH13_HUMAN]                                                    | 2.48  | 1 | 3  | 4  | 5   |      |      |      |      |      |      |      | 1.35 | 1.03 | 1.89  | 1.09 | 1938 | 223.5 | 5.68 |
| Q7Z406 | Myosin-14 OS=Homo sapiens GN=MYH14 PE=1 SV=2 - [MYH14_HUMAN]                                                    | 4.86  | 1 | 2  | 9  | 19  | 0.55 | 0.50 | 0.59 | 0.54 | 0.90 | 0.80 | 0.86 | 0.76 | 1995 | 227.7 | 5.60 |      |       |      |
| Q9Y2K3 | Myosin-15 OS=Homo sapiens GN=MYH15 PE=1 SV=5 - [MYH15_HUMAN]                                                    | 1.85  | 1 | 2  | 2  | 2   |      |      |      |      |      |      |      | 0.77 | 0.88 | 0.89  | 1.02 | 1946 | 224.5 | 5.85 |
| Q9Y623 | Myosin-4 OS=Homo sapiens GN=MYH4 PE=1 SV=2 - [MYH4_HUMAN]                                                       | 2.53  | 2 | 1  | 4  | 13  |      |      |      |      |      |      |      | 0.88 | 0.85 | 1.01  | 0.98 | 1939 | 222.9 | 5.85 |
| P12883 | Myosin-7 OS=Homo sapiens GN=MYH7 PE=1 SV=5 - [MYH7_HUMAN]                                                       | 1.34  | 3 | 2  | 3  | 3   | 0.41 | 0.84 | 1.66 | 3.40 | 1.15 | 0.09 | 1.11 | 0.08 | 1935 | 223.0 | 5.80 |      |       |      |
| A7E2Y1 | Myosin-7B OS=Homo sapiens GN=MYH7B PE=2 SV=3 - [MYH7B_HUMAN]                                                    | 1.70  | 5 | 2  | 3  | 3   |      |      |      |      |      |      |      | 1.47 | 0.99 | 1.27  | 0.85 | 1941 | 221.3 | 6.01 |
| P13535 | Myosin-8 OS=Homo sapiens GN=MYH8 PE=1 SV=3 - [MYH8_HUMAN]                                                       | 3.20  | 2 | 1  | 4  | 13  | 0.91 | 1.16 | 0.82 | 1.05 |      |      |      |      |      |       |      | 1937 | 222.6 | 5.74 |
| P35579 | Myosin-9 OS=Homo sapiens GN=MYH9 PE=1 SV=4 - [MYH9_HUMAN]                                                       | 33.98 | 2 | 47 | 58 | 387 | 0.51 | 0.43 | 0.65 | 0.50 | 1.67 | 1.90 | 1.27 | 1.42 | 1960 | 226.4 | 5.60 |      |       |      |
| Q13203 | Myosin-binding protein H OS=Homo sapiens GN=MYBPH PE=2 SV=4 - [MYBPH_HUMAN]                                     | 2.10  | 1 | 1  | 1  | 1   |      |      |      |      |      |      |      | 0.63 | 0.49 | 0.70  | 0.54 | 477  | 52.0  | 6.73 |
| Q09013 | Myotonin-protein kinase OS=Homo sapiens GN=DMPK PE=1 SV=3 - [DMPK_HUMAN]                                        | 1.43  | 1 | 1  | 1  | 1   | 1.10 | 0.92 | 1.32 | 1.12 |      |      |      |      |      |       |      | 629  | 69.3  | 5.02 |
| P58546 | Myotrophin OS=Homo sapiens GN=MTPN PE=1 SV=2 - [MTPN_HUMAN]                                                     | 38.14 | 1 | 3  | 3  | 9   |      |      |      |      |      |      |      | 1.27 | 1.23 | 1.19  | 0.99 | 118  | 12.9  | 5.52 |
| Q13613 | Myotubularin-related protein 1 OS=Homo sapiens GN=MTMR1 PE=1 SV=4 - [MTMR1_HUMAN]                               | 2.26  | 1 | 1  | 1  | 4   |      |      |      |      |      |      |      | 1.63 | 0.76 | 1.58  | 0.74 | 665  | 74.6  | 7.14 |
| Q9C0I1 | Myotubularin-related protein 12 OS=Homo sapiens GN=MTMR12 PE=1 SV=2 - [MTMRC_HUMAN]                             | 6.69  | 1 | 2  | 2  | 2   | 0.81 | 0.85 | 0.75 | 0.79 | 0.18 | 0.19 | 0.21 | 0.22 | 747  | 86.1  | 6.62 |      |       |      |
| Q8NCE2 | Myotubularin-related protein 14 OS=Homo sapiens GN=MTMR14 PE=1 SV=2 - [MTMRE_HUMAN]                             | 6.15  | 1 | 2  | 2  | 3   | 0.81 | 0.73 | 0.73 | 0.66 |      |      |      |      |      |       |      | 650  | 72.2  | 6.24 |
| Q13614 | Myotubularin-related protein 2 OS=Homo sapiens GN=MTMR2 PE=1 SV=4 - [MTMR2_HUMAN]                               | 6.69  | 1 | 3  | 3  | 14  | 0.92 | 0.85 | 0.99 | 0.92 | 0.61 | 0.54 | 1.28 | 0.99 | 643  | 73.3  | 7.40 |      |       |      |
| Q96QG7 | Myotubularin-related protein 9 OS=Homo sapiens GN=MTMR9 PE=1 SV=1 - [MTMR9_HUMAN]                               | 2.91  | 1 | 1  | 1  | 1   |      |      |      |      |      |      |      | 1.22 | 3.01 | 0.39  | 0.97 | 549  | 63.4  | 6.39 |
| Q9NPC6 | Myozenin-2 OS=Homo sapiens GN=MYOZ2 PE=1 SV=1 - [MYOZ2_HUMAN]                                                   | 3.03  | 1 | 1  | 1  | 1   |      |      |      |      |      |      |      | 0.72 | 0.88 | 0.91  | 1.10 | 264  | 29.9  | 8.25 |
| P29966 | Myristoylated alanine-rich C-kinase substrate OS=Homo sapiens GN=MARCKS PE=1 SV=4 - [MARCS_HUMAN]               | 15.66 | 1 | 3  | 3  | 4   |      |      |      |      |      |      |      | 1.04 | 1.00 | 1.02  | 0.98 | 332  | 31.5  | 4.45 |
| Q9UQQ1 | N-acetylated-alpha-linked acidic dipeptidase-like protein OS=Homo sapiens GN=NAALADL1 PE=2 SV=2 - [NALDL_HUMAN] | 4.59  | 1 | 2  | 2  | 3   | 0.69 |      |      |      | 1.06 | 0.63 | 0.57 | 1.01 | 0.90 | 740   | 80.5 | 5.36 |       |      |
| Q86SF2 | N-acetylgalactosaminyltransferase 7 OS=Homo sapiens GN=GALNT7 PE=1 SV=1 - [GALT7_HUMAN]                         | 4.11  | 1 | 2  | 2  | 3   | 0.85 | 0.92 | 0.79 | 0.86 | 1.09 | 1.21 | 1.28 | 1.42 | 657  | 75.3  | 7.11 |      |       |      |

|        |                                                                                                                                   |       |    |    |    |     |      |      |      |      |      |      |      |      |      |       |      |
|--------|-----------------------------------------------------------------------------------------------------------------------------------|-------|----|----|----|-----|------|------|------|------|------|------|------|------|------|-------|------|
| Q9UK23 | N-acetylglucosamine-1-phosphodiester alpha-N-acetylglucosaminidase OS=Homo sapiens GN=NAGPA PE=2 SV=2 - [NAGPA_HUMAN]             | 4.27  | 1  | 2  | 2  | 7   | 1.20 | 1.09 | 1.18 | 1.09 | 0.85 | 0.89 | 0.88 | 0.91 | 515  | 56.0  | 6.60 |
| Q9UJ9  | N-acetylglucosamine-1-phosphotransferase subunit gamma OS=Homo sapiens GN=GNPTG PE=1 SV=1 - [GNPTG_HUMAN]                         | 21.97 | 1  | 3  | 3  | 15  | 1.17 | 0.96 | 1.18 | 1.02 | 1.00 | 0.92 | 0.98 | 0.93 | 305  | 34.0  | 6.95 |
| Q8N159 | N-acetylglutamate synthase, mitochondrial OS=Homo sapiens GN=NAGS PE=1 SV=1 - [NAGS_HUMAN]                                        | 2.06  | 1  | 1  | 1  | 1   | 1.01 | 0.85 | 1.10 | 0.93 |      |      |      |      | 534  | 58.1  | 8.90 |
| Q8NFS9 | N-acetyllactosaminide beta-1,6-N-acetylglucosaminyl-transferase, isoform C OS=Homo sapiens GN=GCNT2 PE=2 SV=2 - [GCNT2C_HUMAN]    | 4.48  | 1  | 1  | 1  | 1   | 1.29 | 1.41 | 1.23 | 1.35 |      |      |      |      | 402  | 46.5  | 8.16 |
| Q96PD5 | N-acetylmuramoyl-L-alanine amidase OS=Homo sapiens GN=PGLYRP2 PE=1 SV=1 - [PGRP2_HUMAN]                                           | 47.22 | 1  | 18 | 18 | 427 | 1.06 | 1.05 | 1.02 | 1.04 | 0.83 | 0.83 | 0.86 | 0.83 | 576  | 62.2  | 7.55 |
| O95671 | N-acetylserotonin O-methyltransferase-like protein OS=Homo sapiens GN=ASMTL PE=1 SV=3 - [ASML_HUMAN]                              | 1.45  | 1  | 1  | 1  | 1   |      |      |      |      | 1.00 | 1.00 | 0.94 | 0.94 | 621  | 68.8  | 6.07 |
| Q9H0A0 | N-acetyltransferase 10 OS=Homo sapiens GN=NAT10 PE=1 SV=2 - [NAT10_HUMAN]                                                         | 1.76  | 1  | 1  | 1  | 1   |      |      |      |      | 0.98 | 1.31 | 0.68 | 0.90 | 1025 | 115.7 | 8.27 |
| Q5FWF5 | N-acetyltransferase ESCO1 OS=Homo sapiens GN=ESCO1 PE=1 SV=3 - [ESCO1_HUMAN]                                                      | 2.38  | 1  | 1  | 1  | 2   | 0.86 | 0.37 | 0.71 | 0.31 |      |      |      |      | 840  | 94.9  | 9.16 |
| Q14CX7 | N-alpha-acetyltransferase 25, NatB auxiliary subunit OS=Homo sapiens GN=NAA25 PE=1 SV=1 - [NAA25_HUMAN]                           | 1.95  | 11 | 1  | 3  | 3   |      |      |      |      | 1.13 | 1.41 | 1.11 | 1.38 | 972  | 112.2 | 6.64 |
| Q86UY6 | N-alpha-acetyltransferase 40 OS=Homo sapiens GN=NAA40 PE=2 SV=1 - [NAA40_HUMAN]                                                   | 8.44  | 1  | 1  | 1  | 1   | 0.72 | 0.69 | 0.70 | 0.67 |      |      |      |      | 237  | 27.2  | 7.39 |
| P15882 | N-chimaerin OS=Homo sapiens GN=CHN1 PE=1 SV=3 - [CHIN_HUMAN]                                                                      | 5.88  | 1  | 2  | 2  | 2   |      |      |      |      | 1.16 | 1.52 |      |      | 459  | 53.1  | 6.98 |
| Q7Z6G3 | N-terminal EF-hand calcium-binding protein 2 OS=Homo sapiens GN=NECAB2 PE=1 SV=1 - [NECA2_HUMAN]                                  | 9.84  | 1  | 1  | 2  | 2   | 1.43 | 1.32 | 1.38 | 1.28 |      |      |      |      | 386  | 43.2  | 5.50 |
| P20933 | N(4)-(beta-N-acetylglucosaminy)-L-asparaginase OS=Homo sapiens GN=AGA PE=1 SV=2 - [ASPG_HUMAN]                                    | 7.80  | 1  | 3  | 3  | 6   | 1.06 | 1.07 | 1.03 | 1.06 | 1.02 | 0.91 | 1.11 | 0.98 | 346  | 37.2  | 6.28 |
| O14745 | Na(+)/H(+) exchange regulatory cofactor NHE-RF1 OS=Homo sapiens GN=SLC9A3R1 PE=1 SV=4 - [NHRF1_HUMAN]                             | 16.48 | 1  | 6  | 6  | 19  | 0.88 | 0.81 | 1.00 | 0.92 | 1.36 | 1.21 | 1.38 | 1.27 | 358  | 38.8  | 5.77 |
| Q15599 | Na(+)/H(+) exchange regulatory cofactor NHE-RF2 OS=Homo sapiens GN=SLC9A3R2 PE=1 SV=2 - [NHRF2_HUMAN]                             | 8.01  | 1  | 2  | 2  | 2   |      |      |      |      | 0.77 | 0.73 | 1.04 | 0.98 | 337  | 37.4  | 7.93 |
| Q149M9 | NACHT and WD repeat domain-containing protein 1 OS=Homo sapiens GN=NWD1 PE=2 SV=3 - [NWD1_HUMAN]                                  | 1.92  | 1  | 2  | 2  | 2   | 0.74 | 1.01 | 0.77 | 1.05 |      |      |      |      | 1564 | 174.4 | 6.74 |
| Q9C000 | NACHT, LRR and PYD domains-containing protein 1 OS=Homo sapiens GN=NLRP1 PE=1 SV=1 - [NALP1_HUMAN]                                | 1.43  | 1  | 1  | 1  | 1   | 0.42 | 0.29 | 0.45 | 0.31 |      |      |      |      | 1473 | 165.8 | 6.84 |
| Q86W24 | NACHT, LRR and PYD domains-containing protein 14 OS=Homo sapiens GN=NLRP14 PE=2 SV=1 - [NAL14_HUMAN]                              | 5.03  | 1  | 3  | 3  | 5   | 0.73 | 0.79 | 0.79 | 0.87 | 0.07 | 0.11 | 0.61 | 0.59 | 1093 | 124.7 | 6.61 |
| Q96P20 | NACHT, LRR and PYD domains-containing protein 3 OS=Homo sapiens GN=NLRP3 PE=1 SV=3 - [NALP3_HUMAN]                                | 5.41  | 1  | 2  | 2  | 2   |      |      |      |      | 1.53 | 1.32 | 1.32 | 1.14 | 1036 | 118.1 | 6.65 |
| Q96MN2 | NACHT, LRR and PYD domains-containing protein 4 OS=Homo sapiens GN=NLRP4 PE=2 SV=3 - [NALP4_HUMAN]                                | 0.91  | 1  | 1  | 1  | 1   | 1.96 | 2.34 | 2.26 | 2.70 |      |      |      |      | 994  | 113.3 | 5.80 |
| Q7RTR0 | NACHT, LRR and PYD domains-containing protein 9 OS=Homo sapiens GN=NLRP9 PE=2 SV=1 - [NALP9_HUMAN]                                | 2.83  | 1  | 1  | 2  | 2   |      |      |      |      | 0.58 | 0.59 | 0.82 | 0.84 | 991  | 113.2 | 6.51 |
| P23368 | NAD-dependent malic enzyme, mitochondrial OS=Homo sapiens GN=ME2 PE=1 SV=1 - [MAOM_HUMAN]                                         | 2.74  | 1  | 1  | 1  | 1   |      |      |      |      | 0.80 | 0.83 | 0.70 | 0.73 | 584  | 65.4  | 7.61 |
| O95299 | NADH dehydrogenase [ubiquinone] 1 alpha subcomplex subunit 10, mitochondrial OS=Homo sapiens GN=NDUFA10 PE=1 SV=1 - [NDUAA_HUMAN] | 2.82  | 1  | 1  | 1  | 1   |      |      |      |      | 0.89 | 0.84 | 0.93 | 0.88 | 355  | 40.7  | 8.48 |
| Q9P0J0 | NADH dehydrogenase [ubiquinone] 1 alpha subcomplex subunit 13 OS=Homo sapiens GN=NDUFA13 PE=1 SV=3 - [NDUAD_HUMAN]                | 7.64  | 1  | 1  | 1  | 6   | 1.51 | 1.46 | 1.61 | 1.54 |      |      |      |      | 144  | 16.7  | 8.43 |
| O95139 | NADH dehydrogenase [ubiquinone] 1 beta subcomplex subunit 6 OS=Homo sapiens GN=NDUF6 PE=1 SV=3 - [NDUB6_HUMAN]                    | 7.03  | 1  | 1  | 1  | 5   | 0.87 | 0.83 | 0.93 | 0.88 | 1.19 | 0.88 | 1.25 | 1.04 | 128  | 15.5  | 9.63 |
| P49821 | NADH dehydrogenase [ubiquinone] flavoprotein 1, mitochondrial OS=Homo sapiens GN=NDUFV1 PE=1 SV=4 - [NDUV1_HUMAN]                 | 4.31  | 1  | 1  | 1  | 1   | 0.96 | 1.28 | 1.10 | 1.47 |      |      |      |      | 464  | 50.8  | 8.21 |
| O75251 | NADH dehydrogenase [ubiquinone] iron-sulfur protein 7, mitochondrial OS=Homo sapiens GN=NDUFS7 PE=1 SV=3 - [NDUS7_HUMAN]          | 6.57  | 1  | 1  | 1  | 1   | 0.94 | 1.12 | 1.16 | 1.38 |      |      |      |      | 213  | 23.5  | 9.99 |

|        |                                                                                                           |       |   |   |    |     |      |      |      |      |      |       |      |      |      |       |      |
|--------|-----------------------------------------------------------------------------------------------------------|-------|---|---|----|-----|------|------|------|------|------|-------|------|------|------|-------|------|
| Q16798 | NADP-dependent malic enzyme, mitochondrial OS=Homo sapiens GN=ME3 PE=2 SV=2 - [MAON_HUMAN]                | 1.32  | 1 | 1 | 1  | 1   | 0.22 | 0.28 | 1.19 | 1.53 | 604  | 67.0  | 7.97 |      |      |       |      |
| P22570 | NADPH:adrenodoxin oxidoreductase, mitochondrial OS=Homo sapiens GN=FDXR PE=1 SV=3 - [ADRO_HUMAN]          | 2.24  | 1 | 1 | 1  | 1   | #### | 8.61 | ###  | 7.56 | 491  | 53.8  | 8.44 |      |      |       |      |
| Q6T4R5 | Nance-Horan syndrome protein OS=Homo sapiens GN=NHS PE=1 SV=1 - [NHS_HUMAN]                               | 2.15  | 9 | 2 | 3  | 6   | 1.17 | 0.93 | 1.13 | 0.91 | 0.67 | 1.09  | 1.07 | 1.74 | 1630 | 176.6 | 6.79 |
| P60323 | Nanos homolog 3 OS=Homo sapiens GN=NANOS3 PE=1 SV=1 - [NANOS3_HUMAN]                                      | 7.51  | 1 | 1 | 1  | 6   | 1.17 | 1.01 | 0.98 | 0.85 | 0.49 | 0.29  | 0.63 | 0.37 | 173  | 18.8  | 8.91 |
| Q9H009 | Nascent polypeptide-associated complex subunit alpha-2 OS=Homo sapiens GN=NACA2 PE=1 SV=1 - [NACA2_HUMAN] | 9.77  | 1 | 2 | 2  | 5   | 0.43 | 0.86 | 0.36 | 0.71 | 215  | 23.2  | 4.73 |      |      |       |      |
| P01160 | Natriuretic peptides A OS=Homo sapiens GN=NPPA PE=1 SV=1 - [ANF_HUMAN]                                    | 5.88  | 1 | 1 | 1  | 2   | 1.05 | 1.06 | 1.04 | 1.07 | 1.82 | 1.78  | 1.61 | 1.58 | 153  | 16.7  | 7.15 |
| Q9Y2A7 | Nck-associated protein 1 OS=Homo sapiens GN=NCKAP1 PE=1 SV=1 - [NCKP1_HUMAN]                              | 1.33  | 1 | 1 | 1  | 1   | 0.87 | 0.86 | 0.90 | 0.90 | 1128 | 128.7 | 6.62 |      |      |       |      |
| O14513 | Nck-associated protein 5 OS=Homo sapiens GN=NCKAP5 PE=2 SV=2 - [NCKP5_HUMAN]                              | 0.63  | 1 | 1 | 1  | 1   | 1.13 | 0.88 | 0.91 | 0.71 | 1909 | 208.4 | 8.07 |      |      |       |      |
| Q9HCH0 | Nck-associated protein 5-like OS=Homo sapiens GN=NCKAP5L PE=1 SV=2 - [NCK5L_HUMAN]                        | 6.69  | 1 | 3 | 3  | 3   | 0.70 | 0.87 | 0.88 | 1.11 | 1330 | 138.9 | 8.13 |      |      |       |      |
| Q9NZQ3 | NCK-interacting protein with SH3 domain OS=Homo sapiens GN=NCKIPSD PE=1 SV=1 - [SPN90_HUMAN]              | 2.08  | 9 | 1 | 2  | 3   | 0.77 | 0.77 | 0.72 | 0.71 | 722  | 78.9  | 6.38 |      |      |       |      |
| O76041 | Nebulette OS=Homo sapiens GN=NEBL PE=2 SV=1 - [NEBL_HUMAN]                                                | 1.38  | 1 | 1 | 1  | 1   | 0.67 | 0.77 | 0.94 | 1.09 | 1014 | 116.4 | 7.99 |      |      |       |      |
| P20929 | Nebulin OS=Homo sapiens GN=NEB PE=1 SV=4 - [NEBU_HUMAN]                                                   | 0.70  | 1 | 3 | 3  | 4   | 0.94 | 1.01 | 0.95 | 1.03 | 1.04 | 1.03  | 0.91 | 0.90 | 6669 | 772.4 | 9.07 |
| Q86VF7 | Nebulin-related-anchoring protein OS=Homo sapiens GN=NRAP PE=2 SV=2 - [NRAP_HUMAN]                        | 2.77  | 1 | 2 | 2  | 2   | 1.53 | 1.39 | 1.30 | 1.18 | 1730 | 197.0 | 9.20 |      |      |       |      |
| Q86UW6 | NEDD4-binding protein 2 OS=Homo sapiens GN=N4BP2 PE=1 SV=2 - [N4BP2_HUMAN]                                | 1.02  | 1 | 1 | 2  | 186 | 1.07 | 1.16 | 0.92 | 1.00 | 1770 | 198.7 | 5.21 |      |      |       |      |
| O15049 | NEDD4-binding protein 3 OS=Homo sapiens GN=N4BP3 PE=1 SV=3 - [N4BP3_HUMAN]                                | 2.57  | 1 | 1 | 1  | 1   | 0.80 | 0.74 | 0.84 | 0.77 | 544  | 60.4  | 8.10 |      |      |       |      |
| Q15843 | NEDD8 OS=Homo sapiens GN=NEDD8 PE=1 SV=1 - [NEDD8_HUMAN]                                                  | 13.58 | 1 | 1 | 1  | 3   | 1.75 | 1.61 | 1.44 | 1.32 | 81   | 9.1   | 8.43 |      |      |       |      |
| P18615 | Negative elongation factor E OS=Homo sapiens GN=RDBP PE=1 SV=3 - [NELFE_HUMAN]                            | 6.05  | 1 | 1 | 1  | 1   | 1.00 | 0.93 | 0.96 | 0.90 | 380  | 43.2  | 9.33 |      |      |       |      |
| Q92859 | Neogenin OS=Homo sapiens GN=NEO1 PE=1 SV=2 - [NEO1_HUMAN]                                                 | 3.08  | 1 | 3 | 3  | 11  | 1.03 | 0.94 | 1.07 | 0.99 | 1.00 | 1.12  | 0.91 | 1.02 | 1461 | 159.9 | 6.54 |
| Q7Z494 | Nephrocystin-3 OS=Homo sapiens GN=NPHP3 PE=1 SV=1 - [NPHP3_HUMAN]                                         | 2.93  | 1 | 2 | 2  | 3   | 0.74 | 0.71 | 0.80 | 0.77 | 1.16 | 1.01  | 1.09 | 0.95 | 1330 | 150.8 | 6.76 |
| Q6UX19 | Nephronectin OS=Homo sapiens GN=NPNT PE=2 SV=3 - [NPNT_HUMAN]                                             | 1.24  | 1 | 1 | 1  | 2   | 1.20 | 1.08 | 1.57 | 1.40 | 565  | 61.9  | 8.34 |      |      |       |      |
| Q8NF91 | Nesprin-1 OS=Homo sapiens GN=SYNE1 PE=1 SV=3 - [SYNE1_HUMAN]                                              | 1.46  | 5 | 9 | 10 | 31  | 0.92 | 0.88 | 0.88 | 0.90 | 1.00 | 0.98  | 0.90 | 0.86 | 8797 | ##### | 5.53 |
| Q8WXH0 | Nesprin-2 OS=Homo sapiens GN=SYNE2 PE=1 SV=3 - [SYNE2_HUMAN]                                              | 1.26  | 1 | 7 | 7  | 8   | 0.89 | 0.72 | 1.01 | 0.80 | 2.09 | 2.22  | 1.80 | 1.95 | 6885 | 795.9 | 5.36 |
| Q6ZMZ3 | Nesprin-3 OS=Homo sapiens GN=C14orf49 PE=1 SV=2 - [SYNE3_HUMAN]                                           | 3.59  | 1 | 2 | 2  | 17  | 1.82 | 1.65 | 1.67 | 1.53 | 975  | 112.1 | 6.23 |      |      |       |      |
| Q8IZJ1 | Netrin receptor UNC5B OS=Homo sapiens GN=UNC5B PE=1 SV=2 - [UNC5B_HUMAN]                                  | 0.85  | 1 | 1 | 1  | 1   | 1.54 | 1.31 | 1.41 | 1.22 | 945  | 103.6 | 6.02 |      |      |       |      |
| O95185 | Netrin receptor UNC5C OS=Homo sapiens GN=UNC5C PE=1 SV=2 - [UNC5C_HUMAN]                                  | 2.15  | 1 | 1 | 1  | 1   | 0.83 | 0.91 | 0.75 | 0.83 | 931  | 103.1 | 6.10 |      |      |       |      |
| O00634 | Netrin-3 OS=Homo sapiens GN=NTN3 PE=2 SV=1 - [NET3_HUMAN]                                                 | 1.03  | 1 | 1 | 1  | 1   | 1.39 | 1.39 | 1.07 | 1.07 | 580  | 61.4  | 8.79 |      |      |       |      |
| Q8WTR8 | Netrin-5 OS=Homo sapiens GN=NTN5 PE=2 SV=2 - [NET5_HUMAN]                                                 | 4.70  | 1 | 1 | 1  | 1   | 0.57 | 0.54 | 0.55 | 0.53 | 489  | 53.1  | 9.29 |      |      |       |      |





|        |                                                                                                                               |       |   |   |   |    |      |      |      |      |      |      |      |      |      |       |      |
|--------|-------------------------------------------------------------------------------------------------------------------------------|-------|---|---|---|----|------|------|------|------|------|------|------|------|------|-------|------|
| Q92823 | Neuronal cell adhesion molecule OS=Homo sapiens<br>GN=NRCAM PE=1 SV=3 - [NRCAM_HUMAN]                                         | 3.60  | 1 | 3 | 3 | 5  | 0.96 | 0.66 | 0.73 | 0.50 | 1.14 | 1.36 | 1.19 | 1.42 | 1304 | 143.8 | 5.66 |
| Q7Z3B1 | Neuronal growth regulator 1 OS=Homo sapiens GN=NEGR1<br>PE=1 SV=3 - [NEGR1_HUMAN]                                             | 3.67  | 1 | 1 | 1 | 1  | 0.99 | 0.96 | 1.13 | 1.10 |      |      |      |      | 354  | 38.7  | 6.21 |
| P51674 | Neuronal membrane glycoprotein M6-a OS=Homo sapiens<br>GN=GPM6A PE=1 SV=2 - [GPM6A_HUMAN]                                     | 3.96  | 1 | 1 | 1 | 1  | 0.84 | 0.87 | 0.75 | 0.79 |      |      |      |      | 278  | 31.2  | 5.27 |
| Q9P242 | Neuronal tyrosine-phosphorylated phosphoinositide-3-kinase<br>adapter 2 OS=Homo sapiens GN=NYAP2 PE=1 SV=3 -<br>[NYAP2_HUMAN] | 1.38  | 1 | 1 | 1 | 1  |      |      |      |      | 1.23 | 1.27 | 1.25 | 1.30 | 653  | 70.5  | 8.48 |
| Q8IY17 | Neuropathy target esterase OS=Homo sapiens GN=PNPLA6<br>PE=1 SV=2 - [PLPL6_HUMAN]                                             | 2.34  | 1 | 2 | 2 | 2  | 1.19 | 1.05 | 1.02 | 0.90 |      |      |      |      | 1366 | 149.9 | 7.81 |
| Q8NG41 | Neuropeptide B OS=Homo sapiens GN=NPB PE=1 SV=1 -<br>[NPB_HUMAN]                                                              | 12.00 | 1 | 2 | 2 | 4  |      |      |      |      | 0.81 | 0.82 | 0.88 | 0.85 | 125  | 13.1  | 9.91 |
| P25929 | Neuropeptide Y receptor type 1 OS=Homo sapiens<br>GN=NPY1R PE=1 SV=1 - [NPY1R_HUMAN]                                          | 5.47  | 1 | 1 | 1 | 3  | 0.60 | 0.48 | 0.59 | 0.48 |      |      |      |      | 384  | 44.4  | 7.80 |
| P49146 | Neuropeptide Y receptor type 2 OS=Homo sapiens<br>GN=NPY2R PE=2 SV=1 - [NPY2R_HUMAN]                                          | 3.67  | 1 | 1 | 1 | 7  |      |      |      |      | 0.71 | 0.81 | 0.69 | 0.79 | 381  | 42.7  | 7.23 |
| P50391 | Neuropeptide Y receptor type 4 OS=Homo sapiens<br>GN=PPYR1 PE=2 SV=1 - [NPY4R_HUMAN]                                          | 6.40  | 1 | 1 | 1 | 11 | 0.91 | 0.86 | 0.99 | 0.93 | 1.39 | 1.25 | 1.44 | 1.38 | 375  | 42.2  | 8.13 |
| P48145 | Neuropeptides B/W receptor type 1 OS=Homo sapiens<br>GN=NPBWR1 PE=1 SV=2 - [NPBW1_HUMAN]                                      | 3.66  | 1 | 2 | 2 | 3  |      |      |      |      | 0.84 | 0.85 | 0.71 | 0.74 | 328  | 36.1  | 8.73 |
| P48146 | Neuropeptides B/W receptor type 2 OS=Homo sapiens<br>GN=NPBWR2 PE=1 SV=2 - [NPBW2_HUMAN]                                      | 2.40  | 1 | 1 | 1 | 1  |      |      |      |      | 0.83 | 1.13 | 0.77 | 1.04 | 333  | 36.8  | 9.17 |
| O14786 | Neuropilin-1 OS=Homo sapiens GN=NRP1 PE=1 SV=3 -<br>[NRP1_HUMAN]                                                              | 12.78 | 1 | 7 | 7 | 20 | 1.15 | 1.23 | 1.07 | 1.22 | 1.13 | 1.23 | 1.17 | 1.25 | 923  | 103.1 | 5.88 |
| O60462 | Neuropilin-2 OS=Homo sapiens GN=NRP2 PE=1 SV=2 -<br>[NRP2_HUMAN]                                                              | 0.86  | 1 | 1 | 1 | 1  |      |      |      |      | 0.84 | 0.41 | 0.88 | 0.43 | 931  | 104.8 | 5.17 |
| O15240 | Neurosecretory protein VGF OS=Homo sapiens GN=VGF<br>PE=1 SV=2 - [VGF_HUMAN]                                                  | 2.28  | 1 | 1 | 1 | 1  | 0.93 | 0.93 | 1.01 | 1.01 |      |      |      |      | 615  | 67.2  | 4.78 |
| Q9P121 | Neurotrimin OS=Homo sapiens GN=NTM PE=1 SV=1 -<br>[NTRI_HUMAN]                                                                | 2.91  | 1 | 1 | 1 | 2  | 0.85 | 0.74 | 0.85 | 0.75 |      |      |      |      | 344  | 37.9  | 7.81 |
| Q96GC6 | Neurotrophin receptor-interacting factor homolog OS=Homo<br>sapiens GN=ZNF274 PE=1 SV=2 - [ZN274_HUMAN]                       | 3.06  | 1 | 2 | 2 | 3  | 0.78 | 0.63 | 0.70 | 0.57 |      |      |      |      | 653  | 74.1  | 6.74 |
| P56730 | Neurotrypsin OS=Homo sapiens GN=PRSS12 PE=2 SV=2 -<br>[NETR_HUMAN]                                                            | 2.74  | 1 | 1 | 1 | 1  |      |      |      |      | 0.78 | 0.79 | 0.95 | 0.96 | 875  | 97.0  | 8.03 |
| Q14697 | Neutral alpha-glucosidase AB OS=Homo sapiens GN=GANAB<br>PE=1 SV=3 - [GANAB_HUMAN]                                            | 7.73  | 1 | 7 | 7 | 13 | 1.08 | 1.09 | 1.10 | 1.13 | 0.77 | 0.86 | 0.76 | 0.85 | 944  | 106.8 | 6.14 |
| P43007 | Neutral amino acid transporter A OS=Homo sapiens<br>GN=SLC1A4 PE=1 SV=1 - [SAT1_HUMAN]                                        | 5.08  | 1 | 1 | 1 | 10 |      |      |      |      | 0.91 | 1.12 | 1.02 | 1.24 | 532  | 55.7  | 6.25 |
| Q9NR71 | Neutral ceramidase OS=Homo sapiens GN=ASAH2 PE=1<br>SV=2 - [ASAH2_HUMAN]                                                      | 3.08  | 1 | 1 | 1 | 3  | 0.69 | 0.71 | 0.64 | 0.66 |      |      |      |      | 780  | 85.5  | 7.23 |
| P22894 | Neutrophil collagenase OS=Homo sapiens GN=MMP8 PE=1<br>SV=1 - [MMP8_HUMAN]                                                    | 8.57  | 1 | 3 | 3 | 8  | 1.21 | 1.28 | 1.31 | 1.37 | 1.10 | 1.31 | 1.04 | 1.24 | 467  | 53.4  | 6.87 |
| Q15080 | Neutrophil cytosol factor 4 OS=Homo sapiens GN=NCF4<br>PE=1 SV=2 - [NCF4_HUMAN]                                               | 5.31  | 1 | 2 | 2 | 2  | 0.92 | 0.81 | 1.14 | 1.00 |      |      |      |      | 339  | 39.0  | 6.83 |
| P59665 | Neutrophil defensin 1 OS=Homo sapiens GN=DEFA1 PE=1<br>SV=1 - [DEF1_HUMAN]                                                    | 35.11 | 1 | 1 | 5 | 20 |      |      |      |      | 0.83 | 1.03 | 0.96 | 1.18 | 94   | 10.2  | 6.99 |
| P59666 | Neutrophil defensin 3 OS=Homo sapiens GN=DEFA3 PE=1<br>SV=1 - [DEF3_HUMAN]                                                    | 35.11 | 1 | 1 | 5 | 20 |      |      |      |      | 1.48 | 1.51 | 1.46 | 1.48 | 94   | 10.2  | 5.99 |
| P08246 | Neutrophil elastase OS=Homo sapiens GN=ELANE PE=1<br>SV=1 - [ELNE_HUMAN]                                                      | 29.96 | 1 | 5 | 5 | 42 | 1.35 | 1.33 | 1.37 | 1.42 | 0.50 | 0.54 | 0.47 | 0.50 | 267  | 28.5  | 9.35 |
| P80188 | Neutrophil gelatinase-associated lipocalin OS=Homo sapiens<br>GN=LCN2 PE=1 SV=2 - [NGAL_HUMAN]                                | 29.80 | 1 | 4 | 4 | 32 | 1.03 | 1.04 | 1.15 | 1.15 | 1.33 | 1.41 | 1.32 | 1.37 | 198  | 22.6  | 8.91 |
| Q0ZGT2 | Nexilin OS=Homo sapiens GN=NEXN PE=1 SV=1 -<br>[NEXN_HUMAN]                                                                   | 8.15  | 1 | 6 | 6 | 18 |      |      |      |      | 2.24 | 2.17 | 2.18 | 2.01 | 675  | 80.6  | 5.33 |

|        |                                                                                                           |       |   |    |    |    |      |      |      |      |      |      |      |      |      |       |      |
|--------|-----------------------------------------------------------------------------------------------------------|-------|---|----|----|----|------|------|------|------|------|------|------|------|------|-------|------|
| O15453 | Next to BRCA1 gene 2 protein OS=Homo sapiens GN=NBR2 PE=2 SV=1 - [NBR2_HUMAN]                             | 21.43 | 1 | 1  | 1  | 3  | 0.99 | 0.85 | 1.40 | 1.22 | 0.84 | 0.83 | 0.91 | 0.89 | 112  | 12.3  | 7.83 |
| Q15653 | NF-kappa-B inhibitor beta OS=Homo sapiens GN=NFKBIB PE=1 SV=2 - [IKBB_HUMAN]                              | 5.34  | 1 | 1  | 1  | 1  |      |      |      |      | 1.36 | 1.10 | 1.32 | 1.06 | 356  | 37.7  | 4.84 |
| O00221 | NF-kappa-B inhibitor epsilon OS=Homo sapiens GN=NFKBIE PE=1 SV=3 - [IKBE_HUMAN]                           | 5.00  | 1 | 1  | 1  | 2  |      |      |      |      | 0.49 | 0.49 | 0.44 | 0.43 | 500  | 52.8  | 6.68 |
| Q9BYH8 | NF-kappa-B inhibitor zeta OS=Homo sapiens GN=NFKBIZ PE=1 SV=1 - [IKBZ_HUMAN]                              | 2.09  | 1 | 1  | 1  | 4  | 0.82 | 0.86 | 0.78 | 0.82 |      |      |      |      | 718  | 78.0  | 6.62 |
| Q9UMS0 | NFU1 iron-sulfur cluster scaffold homolog, mitochondrial OS=Homo sapiens GN=NFU1 PE=1 SV=2 - [NFU1_HUMAN] | 1.97  | 1 | 1  | 1  | 2  |      |      |      |      | 0.97 | 1.17 | 0.65 | 0.79 | 254  | 28.4  | 5.07 |
| Q9P2E3 | NFX1-type zinc finger-containing protein 1 OS=Homo sapiens GN=ZNF1 PE=1 SV=2 - [ZNF1_HUMAN]               | 0.83  | 1 | 1  | 1  | 1  |      |      |      |      | 1.10 | 1.11 | 1.16 | 1.17 | 1918 | 220.1 | 7.30 |
| Q5SYE7 | NHS-like protein 1 OS=Homo sapiens GN=NHSL1 PE=1 SV=2 - [NHSL1_HUMAN]                                     | 3.48  | 1 | 2  | 2  | 2  | 0.99 | 0.29 | 1.22 | 0.36 |      |      |      |      | 1610 | 170.6 | 6.96 |
| O60934 | Nibrin OS=Homo sapiens GN=BNB PE=1 SV=1 - [NBN_HUMAN]                                                     | 0.93  | 1 | 1  | 1  | 2  | 1.30 | 1.10 | 1.34 | 1.15 | 1.05 | 1.38 | 0.97 | 1.29 | 754  | 84.9  | 6.90 |
| Q969V3 | Nicalin OS=Homo sapiens GN=NCLN PE=1 SV=2 - [NCLN_HUMAN]                                                  | 5.51  | 1 | 1  | 2  | 3  |      |      |      |      | 1.09 | 1.05 | 5.44 | 5.23 | 563  | 62.9  | 6.89 |
| Q92542 | Nicastrin OS=Homo sapiens GN=NCSTN PE=1 SV=2 - [NICA_HUMAN]                                               | 7.05  | 2 | 3  | 4  | 22 | 0.66 | 0.70 | 0.72 | 0.77 | 0.62 | 0.54 | 0.86 | 0.75 | 709  | 78.4  | 5.99 |
| P43490 | Nicotinamide phosphoribosyltransferase OS=Homo sapiens GN=NAMPT PE=1 SV=1 - [NAMPT_HUMAN]                 | 3.67  | 1 | 1  | 1  | 1  |      |      |      |      | 0.98 | 0.83 | 0.95 | 0.80 | 491  | 55.5  | 7.15 |
| P14543 | Nidogen-1 OS=Homo sapiens GN=NID1 PE=1 SV=3 - [NID1_HUMAN]                                                | 11.47 | 1 | 12 | 12 | 23 | 1.18 | 1.19 | 1.17 | 1.18 | 0.96 | 0.94 | 0.97 | 0.95 | 1247 | 136.3 | 5.29 |
| Q14112 | Nidogen-2 OS=Homo sapiens GN=NID2 PE=1 SV=3 - [NID2_HUMAN]                                                | 1.45  | 1 | 1  | 1  | 1  |      |      |      |      | 0.70 | 0.74 | 0.78 | 0.82 | 1375 | 151.2 | 5.29 |
| Q7Z2Y5 | Nik-related protein kinase OS=Homo sapiens GN=NRK PE=2 SV=2 - [NRK_HUMAN]                                 | 0.82  | 1 | 1  | 1  | 1  | 1.54 |      | 1.27 |      |      |      |      |      | 1582 | 178.4 | 6.33 |
| Q9Y2I6 | Ninein-like protein OS=Homo sapiens GN=NINL PE=1 SV=2 - [NINL_HUMAN]                                      | 1.74  | 1 | 2  | 2  | 2  | 1.18 | 1.23 | 1.14 | 1.19 | 1.39 | 1.10 | 1.32 | 1.04 | 1382 | 156.2 | 5.06 |
| Q9H841 | NIPA-like protein 2 OS=Homo sapiens GN=NIPAL2 PE=2 SV=1 - [NIPAL2_HUMAN]                                  | 3.26  | 1 | 1  | 1  | 3  |      |      |      |      | 1.27 | 1.26 | 1.30 | 1.29 | 368  | 40.8  | 8.92 |
| Q6KC79 | Nipped-B-like protein OS=Homo sapiens GN=NIPBL PE=1 SV=2 - [NIPBL_HUMAN]                                  | 0.96  | 1 | 2  | 2  | 5  |      |      |      |      | 0.93 | 0.84 | 0.92 | 0.83 | 2804 | 315.9 | 7.91 |
| Q9Y2I1 | Nischarin OS=Homo sapiens GN=NISCH PE=1 SV=3 - [NISCH_HUMAN]                                              | 0.60  | 1 | 1  | 1  | 1  | 0.71 | 0.44 | 0.67 | 0.42 |      |      |      |      | 1504 | 166.5 | 5.14 |
| P29475 | Nitric oxide synthase, brain OS=Homo sapiens GN=NOS1 PE=1 SV=2 - [NOS1_HUMAN]                             | 2.16  | 1 | 2  | 2  | 2  | 1.46 | 1.06 | 1.26 | 0.92 |      |      |      |      | 1434 | 160.9 | 7.42 |
| P29474 | Nitric oxide synthase, endothelial OS=Homo sapiens GN=NOS3 PE=1 SV=3 - [NOS3_HUMAN]                       | 0.50  | 1 | 1  | 1  | 1  | 0.83 |      | 0.99 |      |      |      |      |      | 1203 | 133.2 | 7.27 |
| P26718 | NKG2-D type II integral membrane protein OS=Homo sapiens GN=KLRK1 PE=1 SV=1 - [NKG2D_HUMAN]               | 8.80  | 1 | 1  | 1  | 6  |      |      |      |      | 0.61 | 0.45 | 1.03 | 0.76 | 216  | 25.3  | 8.21 |
| Q5JPE7 | Nodal modulator 2 OS=Homo sapiens GN=NOMO2 PE=1 SV=1 - [NOMO2_HUMAN]                                      | 5.37  | 3 | 2  | 2  | 3  | 1.20 | 1.21 | 1.30 | 1.32 |      |      |      |      | 1267 | 139.4 | 5.76 |
| Q99784 | Noelin OS=Homo sapiens GN=OLFM1 PE=1 SV=4 - [NOE1_HUMAN]                                                  | 12.99 | 1 | 6  | 6  | 13 | 0.92 | 0.96 | 0.92 | 0.96 | 0.90 | 0.99 | 0.82 | 0.90 | 485  | 55.3  | 6.95 |
| O95897 | Noelin-2 OS=Homo sapiens GN=OLFM2 PE=2 SV=2 - [NOE2_HUMAN]                                                | 2.42  | 1 | 1  | 1  | 2  | 0.99 | 1.05 | 0.95 | 1.00 |      |      |      |      | 454  | 51.4  | 7.94 |
| Q13253 | Noggin OS=Homo sapiens GN=NOG PE=1 SV=1 - [NOGG_HUMAN]                                                    | 6.47  | 1 | 1  | 1  | 1  |      |      |      |      | 1.09 | 1.04 | 1.03 | 0.99 | 232  | 25.8  | 8.85 |
| P29597 | Non-receptor tyrosine-protein kinase TYK2 OS=Homo sapiens GN=TYK2 PE=1 SV=3 - [TYK2_HUMAN]                | 1.85  | 1 | 1  | 1  | 2  | 1.00 | 0.98 | 1.05 | 1.04 |      |      |      |      | 1187 | 133.6 | 7.15 |
| P10153 | Non-secretory ribonuclease OS=Homo sapiens GN=RNASE2 PE=1 SV=2 - [RNAS2_HUMAN]                            | 8.70  | 1 | 1  | 1  | 3  |      |      |      |      | 0.78 | 0.83 | 0.97 | 1.04 | 161  | 18.3  | 8.73 |

|        |                                                                                                               |      |   |   |   |   |      |      |      |      |      |      |      |      |       |       |      |
|--------|---------------------------------------------------------------------------------------------------------------|------|---|---|---|---|------|------|------|------|------|------|------|------|-------|-------|------|
| P22307 | Non-specific lipid-transfer protein OS=Homo sapiens GN=SCP2 PE=1 SV=2 - [NLTP_HUMAN]                          | 3.47 | 1 | 1 | 1 | 1 | 1.78 | 1.64 | 1.54 | 1.43 |      | 547  | 59.0 | 6.89 |       |       |      |
| O60443 | Non-syndromic hearing impairment protein 5 OS=Homo sapiens GN=DFNA5 PE=1 SV=2 - [DFNA5_HUMAN]                 | 3.83 | 1 | 1 | 1 | 1 | 0.73 | 0.73 | 0.76 | 0.76 |      | 496  | 54.5 | 5.17 |       |       |      |
| Q8IV9  | Nostrin OS=Homo sapiens GN=NOSTRIN PE=1 SV=2 - [NOSTN_HUMAN]                                                  | 5.73 | 1 | 2 | 2 | 3 | 0.35 | 0.69 | 1.71 | 3.40 | 0.61 | 0.63 | 0.69 | 0.71 | 506   | 57.6  | 8.97 |
| Q9UNZ2 | NSFL1 cofactor p47 OS=Homo sapiens GN=NSFL1C PE=1 SV=2 - [NSF1C_HUMAN]                                        | 3.24 | 1 | 1 | 1 | 3 |      |      |      |      | 1.63 | 1.72 | 1.84 | 1.94 | 370   | 40.5  | 5.10 |
| Q16288 | NT-3 growth factor receptor OS=Homo sapiens GN=NTRK3 PE=1 SV=2 - [NTRK3_HUMAN]                                | 2.62 | 1 | 1 | 1 | 1 |      |      |      |      | 1.49 | 1.37 | 1.45 | 1.33 | 839   | 94.4  | 6.58 |
| Q9H093 | NUAK family SNF1-like kinase 2 OS=Homo sapiens GN=NUAK2 PE=1 SV=1 - [NUAK2_HUMAN]                             | 1.59 | 1 | 1 | 1 | 1 |      |      |      |      | 1.18 | 1.46 | 0.91 | 1.13 | 628   | 69.6  | 8.87 |
| P08651 | Nuclear factor 1 C-type OS=Homo sapiens GN=NFIC PE=1 SV=2 - [NFIC_HUMAN]                                      | 2.56 | 1 | 1 | 1 | 4 | 0.78 | 0.81 | 0.71 | 0.75 |      |      |      |      | 508   | 55.6  | 8.38 |
| Q14494 | Nuclear factor erythroid 2-related factor 1 OS=Homo sapiens GN=NFE2L1 PE=1 SV=1 - [NF2L1_HUMAN]               | 1.30 | 1 | 1 | 1 | 1 |      |      |      |      | 0.15 | 0.50 | 0.22 | 0.75 | 772   | 84.7  | 4.64 |
| Q00653 | Nuclear factor NF-kappa-B p100 subunit OS=Homo sapiens GN=NFKB2 PE=1 SV=4 - [NFKB2_HUMAN]                     | 1.78 | 1 | 1 | 1 | 1 | 1.18 | 1.81 | 1.10 | 1.70 |      |      |      |      | 900   | 96.7  | 6.25 |
| Q6P4R8 | Nuclear factor related to kappa-B-binding protein OS=Homo sapiens GN=NFRKB PE=1 SV=2 - [NFRKB_HUMAN]          | 0.46 | 1 | 1 | 1 | 1 |      |      |      |      | 1.26 | 1.39 | 0.96 | 1.06 | 1299  | 138.9 | 9.25 |
| Q9UHK0 | Nuclear fragile X mental retardation-interacting protein 1 OS=Homo sapiens GN=NUIP1 PE=1 SV=2 - [NUIP1_HUMAN] | 3.03 | 2 | 2 | 2 | 2 | 0.95 | 0.96 | 0.89 | 0.91 | 0.78 | 1.02 | 0.69 | 0.91 | 495   | 56.3  | 9.13 |
| Q8WUM0 | Nuclear pore complex protein Nup133 OS=Homo sapiens GN=NUP133 PE=1 SV=2 - [NU133_HUMAN]                       | 2.60 | 1 | 2 | 2 | 2 |      | 0.77 | 0.52 | 1.34 | 1.06 | ###  | #### | 1156 | 128.9 | 5.10  |      |
| Q92621 | Nuclear pore complex protein Nup205 OS=Homo sapiens GN=NUP205 PE=1 SV=3 - [NU205_HUMAN]                       | 2.24 | 1 | 1 | 3 | 3 |      |      |      |      | 1.75 | 2.03 | 0.86 | 1.00 | 2012  | 227.8 | 6.19 |
| Q99567 | Nuclear pore complex protein Nup88 OS=Homo sapiens GN=NUP88 PE=1 SV=2 - [NUP88_HUMAN]                         | 4.05 | 1 | 2 | 2 | 4 | 1.13 | 1.13 | 1.49 | 1.49 | 1.60 | 1.67 | 1.33 | 1.40 | 741   | 83.5  | 5.69 |
| Q8N1F7 | Nuclear pore complex protein Nup93 OS=Homo sapiens GN=NUP93 PE=1 SV=2 - [NUP93_HUMAN]                         | 1.47 | 1 | 1 | 1 | 1 | 1.28 | 1.24 | 1.32 | 1.30 |      |      |      |      | 819   | 93.4  | 5.72 |
| P52948 | Nuclear pore complex protein Nup98-Nup96 OS=Homo sapiens GN=NUP98 PE=1 SV=4 - [NUP98_HUMAN]                   | 1.65 | 1 | 1 | 1 | 1 |      |      |      |      | 1.35 | 0.99 | 1.25 | 0.91 | 1817  | 197.5 | 6.40 |
| Q9UND3 | Nuclear pore complex-interacting protein OS=Homo sapiens GN=NPIP PE=2 SV=3 - [NPIP_HUMAN]                     | 6.29 | 2 | 1 | 1 | 2 | 0.99 | 0.78 | 1.23 | 0.97 |      |      |      |      | 350   | 40.1  | 9.36 |
| P37198 | Nuclear pore glycoprotein p62 OS=Homo sapiens GN=NUP62 PE=1 SV=3 - [NUP62_HUMAN]                              | 1.15 | 1 | 1 | 1 | 1 | 0.68 | 0.64 | 1.05 | 0.99 |      |      |      |      | 522   | 53.2  | 5.31 |
| Q5VU65 | Nuclear pore membrane glycoprotein 210-like OS=Homo sapiens GN=NUP210L PE=2 SV=1 - [P210L_HUMAN]              | 2.01 | 1 | 2 | 2 | 2 | 0.88 | 1.21 | 0.97 | 1.37 |      |      |      |      | 1888  | 210.5 | 7.50 |
| Q15596 | Nuclear receptor coactivator 2 OS=Homo sapiens GN=NCOA2 PE=1 SV=2 - [NCOA2_HUMAN]                             | 1.23 | 1 | 1 | 1 | 1 | 0.87 | 1.22 | 0.77 | 1.08 |      |      |      |      | 1464  | 159.1 | 6.64 |
| Q13772 | Nuclear receptor coactivator 4 OS=Homo sapiens GN=NCOA4 PE=1 SV=1 - [NCOA4_HUMAN]                             | 1.30 | 1 | 1 | 1 | 1 |      |      |      |      | 2.57 | 2.10 | 2.14 | 1.75 | 614   | 69.7  | 6.01 |
| Q8NI08 | Nuclear receptor coactivator 7 OS=Homo sapiens GN=NCOA7 PE=1 SV=2 - [NCOA7_HUMAN]                             | 2.65 | 1 | 1 | 1 | 2 | 1.34 | 1.09 | 1.22 | 1.00 |      |      |      |      | 942   | 106.1 | 5.59 |
| O75376 | Nuclear receptor corepressor 1 OS=Homo sapiens GN=NCOR1 PE=1 SV=2 - [NCOR1_HUMAN]                             | 2.42 | 1 | 2 | 2 | 2 | 1.15 | 1.08 | 1.16 | 1.10 | 0.87 | 0.75 | 0.69 | 0.59 | 2440  | 270.0 | 7.11 |
| Q9Y618 | Nuclear receptor corepressor 2 OS=Homo sapiens GN=NCOR2 PE=1 SV=2 - [NCOR2_HUMAN]                             | 1.07 | 1 | 2 | 2 | 5 |      |      |      |      | 1.03 | 1.43 | 1.03 | 1.42 | 2525  | 274.6 | 7.59 |
| O00482 | Nuclear receptor subfamily 5 group A member 2 OS=Homo sapiens GN=NR5A2 PE=1 SV=2 - [NR5A2_HUMAN]              | 2.96 | 1 | 1 | 2 | 2 |      |      |      |      | 0.91 | 0.62 | 0.86 | 0.59 | 541   | 61.3  | 7.88 |
| Q9H0G5 | Nuclear speckle splicing regulatory protein 1 OS=Homo sapiens GN=NSRP1 PE=1 SV=1 - [NSRP1_HUMAN]              | 2.87 | 1 | 2 | 2 | 2 | 0.95 | 0.87 | 0.83 | 0.76 |      |      |      |      | 558   | 66.4  | 8.84 |
| O15381 | Nuclear valosin-containing protein-like OS=Homo sapiens GN=NVL PE=1 SV=1 - [NVL_HUMAN]                        | 6.19 | 1 | 3 | 3 | 3 | 1.21 | 1.19 | 1.18 | 1.30 |      |      |      |      | 856   | 95.0  | 6.48 |

|        |                                                                                                                     |       |   |   |   |     |      |      |      |      |      |      |       |       |      |       |      |
|--------|---------------------------------------------------------------------------------------------------------------------|-------|---|---|---|-----|------|------|------|------|------|------|-------|-------|------|-------|------|
| Q86WB0 | Nuclear-interacting partner of ALK OS=Homo sapiens GN=ZC3HC1 PE=1 SV=1 - [NIPA_HUMAN]                               | 3.59  | 1 | 1 | 1 | 1   | 1.30 | 1.16 | 1.29 | 1.16 |      | 502  | 55.2  | 5.62  |      |       |      |
| P67809 | Nuclease-sensitive element-binding protein 1 OS=Homo sapiens GN=YBX1 PE=1 SV=3 - [YBOX1_HUMAN]                      | 5.86  | 1 | 1 | 1 | 1   | 1.00 | 1.06 | 1.17 | 1.25 |      | 324  | 35.9  | 9.88  |      |       |      |
| Q02818 | Nucleobindin-1 OS=Homo sapiens GN=NUCB1 PE=1 SV=4 - [NUCB1_HUMAN]                                                   | 7.81  | 1 | 3 | 3 | 6   |      |      |      | 1.13 | 1.16 | 1.27 | 1.31  | 461   | 53.8 | 5.25  |      |
| P80303 | Nucleobindin-2 OS=Homo sapiens GN=NUCB2 PE=1 SV=2 - [NUCB2_HUMAN]                                                   | 2.14  | 1 | 1 | 1 | 1   | 2.04 | 1.26 | 1.63 | 1.01 |      | 420  | 50.2  | 5.12  |      |       |      |
| Q14978 | Nucleolar and coiled-body phosphoprotein 1 OS=Homo sapiens GN=NOLC1 PE=1 SV=2 - [NOLC1_HUMAN]                       | 2.00  | 1 | 1 | 1 | 1   | 0.70 | 0.79 | 0.76 | 0.87 |      | 699  | 73.6  | 9.47  |      |       |      |
| Q9Y3T9 | Nucleolar complex protein 2 homolog OS=Homo sapiens GN=NOC2L PE=1 SV=4 - [NOC2L_HUMAN]                              | 1.60  | 1 | 1 | 1 | 2   |      |      |      |      | 1.58 | 0.11 | 749   | 84.9  | 5.62 |       |      |
| O60287 | Nucleolar pre-ribosomal-associated protein 1 OS=Homo sapiens GN=URB1 PE=1 SV=4 - [NPA1P_HUMAN]                      | 1.45  | 1 | 2 | 2 | 4   | 1.14 | 1.22 | 1.33 | 1.44 | 0.48 | 1.34 | 0.60  | 1.69  | 2271 | 254.2 | 6.47 |
| Q9BSC4 | Nucleolar protein 10 OS=Homo sapiens GN=NOL10 PE=1 SV=1 - [NOL10_HUMAN]                                             | 1.45  | 1 | 1 | 1 | 1   | 0.87 | 1.51 | 0.70 | 1.20 |      | 688  | 80.3  | 8.46  |      |       |      |
| O00567 | Nucleolar protein 56 OS=Homo sapiens GN=NOP56 PE=1 SV=4 - [NOP56_HUMAN]                                             | 10.77 | 1 | 3 | 3 | 5   | 1.00 | 1.34 | 1.07 | 1.44 | 0.38 | 0.34 | 0.48  | 0.43  | 594  | 66.0  | 9.19 |
| Q9Y2X3 | Nucleolar protein 58 OS=Homo sapiens GN=NOP58 PE=1 SV=1 - [NOP58_HUMAN]                                             | 2.84  | 1 | 1 | 1 | 1   |      |      |      |      | 1.21 | 0.69 | 1.43  | 0.82  | 529  | 59.5  | 8.92 |
| Q9H6R4 | Nucleolar protein 6 OS=Homo sapiens GN=NOL6 PE=1 SV=2 [NOL6_HUMAN]                                                  | 3.23  | 1 | 1 | 1 | 2   |      |      |      |      | 1.42 | 0.31 | 1146  | 127.5 | 7.64 |       |      |
| O75607 | Nucleoplasmin-3 OS=Homo sapiens GN=NPM3 PE=1 SV=3 - [NPM3_HUMAN]                                                    | 2.81  | 1 | 1 | 1 | 1   |      |      |      |      | 0.23 | 0.30 | 0.50  | 0.65  | 178  | 19.3  | 4.63 |
| Q5SRE5 | Nucleoporin NUP188 homolog OS=Homo sapiens GN=NUP188 PE=1 SV=1 - [NU188_HUMAN]                                      | 0.69  | 1 | 1 | 1 | 1   | 0.53 | 0.68 | 0.52 | 0.66 |      | 1749 | 195.9 | 6.73  |      |       |      |
| Q7Z3B4 | Nucleoporin p54 OS=Homo sapiens GN=NUP54 PE=1 SV=2 - [NUP54_HUMAN]                                                  | 3.16  | 1 | 1 | 1 | 2   |      |      |      |      | 1.39 | 1.05 | 1.12  | 0.85  | 507  | 55.4  | 7.02 |
| O15504 | Nucleoporin-like protein 2 OS=Homo sapiens GN=NUPL2 PE=1 SV=1 - [NUPL2_HUMAN]                                       | 4.73  | 1 | 1 | 1 | 1   | 0.85 | 0.86 | 0.78 | 0.80 |      | 423  | 44.8  | 9.19  |      |       |      |
| P15531 | Nucleoside diphosphate kinase A OS=Homo sapiens GN=NME1 PE=1 SV=1 - [NDKA_HUMAN]                                    | 23.03 | 3 | 3 | 3 | 9   |      |      |      |      | 0.85 | 0.95 | 0.84  | 0.91  | 152  | 17.1  | 6.19 |
| A8MXV4 | Nucleoside diphosphate-linked moiety X motif 19, mitochondrial OS=Homo sapiens GN=NUDT19 PE=1 SV=1 - [NUDT19_HUMAN] | 3.73  | 1 | 1 | 1 | 1   | 0.70 | 1.22 | 0.82 | 1.43 |      | 375  | 42.2  | 7.64  |      |       |      |
| Q9BRQ3 | Nucleoside diphosphate-linked moiety X motif 22 OS=Homo sapiens GN=NUDT22 PE=2 SV=3 - [NUDT22_HUMAN]                | 4.95  | 1 | 1 | 1 | 2   | 0.97 | 0.66 | 1.15 | 0.79 |      | 303  | 32.6  | 5.11  |      |       |      |
| Q99733 | Nucleosome assembly protein 1-like 4 OS=Homo sapiens GN=NAP1L4 PE=1 SV=1 - [NP1L4_HUMAN]                            | 5.07  | 1 | 1 | 1 | 1   |      |      |      |      | 1.00 | 0.92 | 0.88  | 0.81  | 375  | 42.8  | 4.69 |
| Q9Y239 | Nucleotide-binding oligomerization domain-containing protein 1 OS=Homo sapiens GN=NOD1 PE=1 SV=1 - [NOD1_HUMAN]     | 0.84  | 1 | 1 | 1 | 1   | 1.48 | 2.15 | 1.28 | 1.85 |      | 953  | 107.6 | 7.11  |      |       |      |
| Q96RS6 | NudC domain-containing protein 1 OS=Homo sapiens GN=NUDC1 PE=1 SV=2 - [NUDC1_HUMAN]                                 | 2.57  | 1 | 1 | 1 | 1   |      |      |      |      | 1.12 | 1.21 | 1.18  | 1.28  | 583  | 66.7  | 5.11 |
| Q5VST9 | Obscurin OS=Homo sapiens GN=OBSCN PE=1 SV=3 - [OBSCN_HUMAN]                                                         | 1.03  | 1 | 3 | 4 | 407 | 1.26 | 1.88 | 1.39 | 2.08 | 2.14 | 2.13 | 1.83  | 1.82  | 7968 | 867.9 | 5.99 |
| O75147 | Obscurin-like protein 1 OS=Homo sapiens GN=OBSL1 PE=1 SV=4 - [OBSL1_HUMAN]                                          | 0.95  | 1 | 1 | 1 | 2   | 1.52 | 1.45 | 1.33 | 1.27 |      | 1896 | 206.8 | 5.63  |      |       |      |
| Q6UX06 | Olfactomedin-4 OS=Homo sapiens GN=OLFM4 PE=1 SV=1 - [OLFM4_HUMAN]                                                   | 5.49  | 1 | 1 | 2 | 3   | 1.12 | 0.93 | 0.66 | 0.55 |      | 510  | 57.2  | 5.69  |      |       |      |
| Q6IF99 | Olfactory receptor 10K2 OS=Homo sapiens GN=OR10K2 PE=2 SV=1 - [O10K2_HUMAN]                                         | 1.92  | 1 | 1 | 1 | 2   | 1.15 | 1.15 | 1.25 | 1.27 |      | 312  | 35.0  | 8.57  |      |       |      |
| Q8NGE3 | Olfactory receptor 10P1 OS=Homo sapiens GN=OR10P1 PE=2 SV=1 - [O10P1_HUMAN]                                         | 1.92  | 1 | 1 | 1 | 1   |      |      |      |      | 1.10 | 1.25 | 1.09  | 1.23  | 313  | 34.7  | 9.70 |
| Q8NGX3 | Olfactory receptor 10T2 OS=Homo sapiens GN=OR10T2 PE=2 SV=1 - [O10T2_HUMAN]                                         | 9.24  | 1 | 1 | 1 | 1   | 1.16 | 1.30 | 1.12 | 1.27 |      | 314  | 35.0  | 9.03  |      |       |      |

|        |                                                                                           |       |   |   |   |    |      |      |      |      |      |      |      |      |     |      |      |      |      |
|--------|-------------------------------------------------------------------------------------------|-------|---|---|---|----|------|------|------|------|------|------|------|------|-----|------|------|------|------|
| B2RN74 | Olfactory receptor 11H12 OS=Homo sapiens GN=OR11H12 PE=2 SV=1 - [O11HC_HUMAN]             | 10.43 | 3 | 2 | 2 | 6  | 0.96 | 1.04 | 0.95 | 1.04 |      |      |      |      |     |      | 326  | 36.5 | 7.84 |
| Q8NHC7 | Olfactory receptor 14C36 OS=Homo sapiens GN=OR14C36 PE=2 SV=1 - [O14CZ_HUMAN]             | 12.18 | 1 | 2 | 2 | 2  | 1.12 | 1.28 | 0.88 | 1.01 | 0.87 | 1.05 | 1.08 | 1.30 | 312 | 34.8 | 8.35 |      |      |
| P47884 | Olfactory receptor 1D4 OS=Homo sapiens GN=OR1D4 PE=2 SV=3 - [OR1D4_HUMAN]                 | 10.61 | 2 | 2 | 2 | 7  | 1.09 | 1.02 | 1.06 | 1.00 |      |      |      |      | 311 | 35.2 | 8.02 |      |      |
| Q6IF42 | Olfactory receptor 2A2 OS=Homo sapiens GN=OR2A2 PE=2 SV=2 - [OR2A2_HUMAN]                 | 5.35  | 1 | 1 | 1 | 2  | 1.10 | 0.80 | 0.88 | 0.64 |      |      |      |      | 318 | 35.8 | 8.37 |      |      |
| Q9H210 | Olfactory receptor 2D2 OS=Homo sapiens GN=OR2D2 PE=2 SV=4 - [OR2D2_HUMAN]                 | 2.27  | 1 | 1 | 1 | 1  |      |      |      |      | 0.86 | 1.06 | 0.62 | 0.77 | 308 | 34.1 | 9.13 |      |      |
| Q9GZK4 | Olfactory receptor 2H1 OS=Homo sapiens GN=OR2H1 PE=2 SV=1 - [OR2H1_HUMAN]                 | 1.90  | 1 | 1 | 1 | 1  | 1.13 | 0.88 | 0.96 | 0.76 |      |      |      |      | 316 | 35.3 | 8.72 |      |      |
| Q6IEZ7 | Olfactory receptor 2T5 OS=Homo sapiens GN=OR2T5 PE=2 SV=1 - [OR2T5_HUMAN]                 | 2.54  | 3 | 1 | 1 | 2  |      |      |      |      | 1.28 | 1.09 | 1.34 | 1.14 | 315 | 35.6 | 8.40 |      |      |
| Q8NHC8 | Olfactory receptor 2T6 OS=Homo sapiens GN=OR2T6 PE=2 SV=2 - [OR2T6_HUMAN]                 | 3.90  | 1 | 1 | 1 | 1  | 1.80 | 2.00 | 1.98 | 2.20 |      |      |      |      | 308 | 34.7 | 8.06 |      |      |
| Q6IF82 | Olfactory receptor 4A47 OS=Homo sapiens GN=OR4A47 PE=2 SV=2 - [O4A47_HUMAN]               | 2.27  | 1 | 1 | 1 | 4  |      |      |      |      | 0.77 | 0.77 | 0.81 | 0.89 | 309 | 34.7 | 8.46 |      |      |
| A6NHA9 | Olfactory receptor 4C46 OS=Homo sapiens GN=OR4C46 PE=2 SV=1 - [O4C46_HUMAN]               | 16.18 | 1 | 2 | 2 | 7  | 1.61 | 1.83 | 1.87 | 2.15 | 1.07 | 1.31 | 0.96 | 1.18 | 309 | 34.5 | 7.91 |      |      |
| Q8NGC6 | Olfactory receptor 4K17 OS=Homo sapiens GN=OR4K17 PE=2 SV=3 - [OR4KH_HUMAN]               | 3.81  | 1 | 2 | 2 | 5  |      |      |      |      | 0.87 | 0.68 | 0.67 | 0.53 | 315 | 35.3 | 8.72 |      |      |
| Q8TCB6 | Olfactory receptor 51E1 OS=Homo sapiens GN=OR51E1 PE=2 SV=1 - [O51E1_HUMAN]               | 3.47  | 1 | 1 | 1 | 1  |      |      |      |      | 0.87 | 1.05 | 0.88 | 1.06 | 317 | 35.2 | 8.40 |      |      |
| A6NGY5 | Olfactory receptor 51F1 OS=Homo sapiens GN=OR51F1 PE=2 SV=1 - [O51F1_HUMAN]               | 5.33  | 1 | 1 | 1 | 2  | 1.14 | 1.29 | 1.01 | 1.15 |      |      |      |      | 319 | 35.8 | 8.03 |      |      |
| Q8NGF1 | Olfactory receptor 52R1 OS=Homo sapiens GN=OR52R1 PE=2 SV=2 - [O52R1_HUMAN]               | 3.17  | 1 | 1 | 1 | 1  |      |      |      |      | 0.60 | 0.73 | 0.83 | 1.01 | 315 | 34.9 | 8.16 |      |      |
| Q9NZP5 | Olfactory receptor 5AC2 OS=Homo sapiens GN=OR5AC2 PE=2 SV=2 - [O5AC2_HUMAN]               | 2.59  | 1 | 1 | 1 | 1  | 0.37 | 0.48 | 0.44 | 0.58 |      |      |      |      | 309 | 35.3 | 8.94 |      |      |
| Q8NH48 | Olfactory receptor 5B3 OS=Homo sapiens GN=OR5B3 PE=2 SV=1 - [OR5B3_HUMAN]                 | 2.23  | 1 | 1 | 1 | 1  |      |      |      |      | 0.90 | 0.85 | 1.08 | 1.02 | 314 | 35.2 | 6.96 |      |      |
| Q8NGR4 | Olfactory receptor 5C1 OS=Homo sapiens GN=OR5C1 PE=2 SV=1 - [OR5C1_HUMAN]                 | 8.13  | 1 | 1 | 1 | 1  | 1.12 | 1.01 | 1.15 | 1.05 |      |      |      |      | 320 | 35.0 | 8.53 |      |      |
| Q8NGL1 | Olfactory receptor 5D18 OS=Homo sapiens GN=OR5D18 PE=2 SV=1 - [OR5D1_HUMAN]               | 5.43  | 1 | 1 | 1 | 1  | 1.06 | 1.03 | 1.04 | 1.02 |      |      |      |      | 313 | 35.3 | 8.34 |      |      |
| Q8NGV7 | Olfactory receptor 5H2 OS=Homo sapiens GN=OR5H2 PE=2 SV=3 - [OR5H2_HUMAN]                 | 1.91  | 1 | 1 | 1 | 1  |      |      |      |      | 0.76 | 0.12 | 0.93 | 0.15 | 314 | 35.9 | 7.65 |      |      |
| Q8WZ92 | Olfactory receptor 5P2 OS=Homo sapiens GN=OR5P2 PE=2 SV=1 - [OR5P2_HUMAN]                 | 5.59  | 1 | 1 | 1 | 1  |      |      |      |      | 0.45 |      | 0.83 |      | 322 | 35.8 | 7.84 |      |      |
| O95007 | Olfactory receptor 6B1 OS=Homo sapiens GN=OR6B1 PE=2 SV=1 - [OR6B1_HUMAN]                 | 4.18  | 1 | 1 | 1 | 1  | 0.62 | 0.99 | 1.01 | 1.61 |      |      |      |      | 311 | 35.3 | 8.46 |      |      |
| Q9NZP2 | Olfactory receptor 6C2 OS=Homo sapiens GN=OR6C2 PE=2 SV=2 - [OR6C2_HUMAN]                 | 5.13  | 1 | 1 | 1 | 2  |      |      |      |      | 1.00 | 1.25 | 0.96 | 1.11 | 312 | 35.2 | 8.66 |      |      |
| Q8NGQ2 | Olfactory receptor 6Q1 OS=Homo sapiens GN=OR6Q1 PE=2 SV=2 - [OR6Q1_HUMAN]                 | 2.52  | 1 | 1 | 1 | 1  | 0.20 | 0.21 | 0.18 | 0.19 |      |      |      |      | 317 | 35.7 | 8.06 |      |      |
| Q8NGN1 | Olfactory receptor 6T1 OS=Homo sapiens GN=OR6T1 PE=2 SV=1 - [OR6T1_HUMAN]                 | 5.26  | 1 | 1 | 1 | 1  |      |      |      |      | 0.52 | 0.90 | 2.12 | 3.69 | 323 | 36.3 | 9.22 |      |      |
| O60412 | Olfactory receptor 7C2 OS=Homo sapiens GN=OR7C2 PE=2 SV=4 - [OR7C2_HUMAN]                 | 2.82  | 1 | 1 | 1 | 2  | 0.29 | 0.33 | 0.26 | 0.29 |      |      |      |      | 319 | 35.3 | 7.80 |      |      |
| Q96RA2 | Olfactory receptor 7D2 OS=Homo sapiens GN=OR7D2 PE=2 SV=2 - [OR7D2_HUMAN]                 | 1.60  | 1 | 1 | 1 | 1  |      |      |      |      | 0.80 | 1.07 | 0.62 | 0.83 | 312 | 34.7 | 7.05 |      |      |
| Q8WWZ8 | Oncoprotein-induced transcript 3 protein OS=Homo sapiens GN=OIT3 PE=1 SV=2 - [OIT3_HUMAN] | 12.29 | 1 | 5 | 5 | 10 | 1.11 | 1.15 | 1.10 | 1.13 | 0.58 | 0.65 | 0.85 | 0.95 | 545 | 60.0 | 5.58 |      |      |

|        |                                                                                                       |       |   |   |   |    |      |      |      |      |      |      |       |      |      |       |      |
|--------|-------------------------------------------------------------------------------------------------------|-------|---|---|---|----|------|------|------|------|------|------|-------|------|------|-------|------|
| Q99650 | Oncostatin-M-specific receptor subunit beta OS=Homo sapiens GN=OSMR PE=1 SV=1 - [OSMR_HUMAN]          | 3.17  | 1 | 2 | 2 | 3  | 0.79 | 0.83 | 0.79 | 0.83 |      | 979  | 110.4 | 5.82 |      |       |      |
| O75665 | Oral-facial-digital syndrome 1 protein OS=Homo sapiens GN=OFD1 PE=1 SV=1 - [OFD1_HUMAN]               | 4.05  | 1 | 2 | 2 | 2  | 1.03 | 1.05 | 0.98 | 1.02 |      | 1012 | 116.6 | 6.10 |      |       |      |
| Q9UBD5 | Origin recognition complex subunit 3 OS=Homo sapiens GN=ORC3 PE=1 SV=1 - [ORC3_HUMAN]                 | 2.81  | 1 | 1 | 1 | 1  | 1.01 | 0.90 | 0.93 | 0.83 |      | 711  | 82.2  | 7.61 |      |       |      |
| O43929 | Origin recognition complex subunit 4 OS=Homo sapiens GN=ORC4 PE=1 SV=2 - [ORC4_HUMAN]                 | 3.44  | 1 | 1 | 1 | 1  |      |      |      |      | 1.73 | 1.34 | 1.53  | 1.19 | 436  | 50.3  | 8.00 |
| P00480 | Ornithine carbamoyltransferase, mitochondrial OS=Homo sapiens GN=OTC PE=1 SV=3 - [OTC_HUMAN]          | 2.54  | 1 | 1 | 1 | 4  |      |      |      |      | 1.45 | 1.51 | 1.27  | 1.32 | 354  | 39.9  | 8.63 |
| P11926 | Ornithine decarboxylase OS=Homo sapiens GN=ODC1 PE=1 SV=2 - [DCOR_HUMAN]                              | 2.17  | 1 | 1 | 1 | 1  |      |      |      |      | 0.86 | 1.15 | 0.62  | 0.83 | 461  | 51.1  | 5.26 |
| Q8IY55 | Osteoclast-associated immunoglobulin-like receptor OS=Homo sapiens GN=OSCAR PE=2 SV=3 - [OSCAR_HUMAN] | 5.32  | 1 | 1 | 1 | 1  | 0.84 | 1.21 | 0.75 | 1.09 |      | 282  | 30.5  | 6.52 |      |       |      |
| Q99983 | Osteomodulin OS=Homo sapiens GN=OMD PE=1 SV=1 - [OMD_HUMAN]                                           | 6.65  | 1 | 1 | 1 | 2  |      |      |      |      | 1.69 | 1.27 | 1.50  | 1.12 | 421  | 49.5  | 5.59 |
| P10451 | Osteopontin OS=Homo sapiens GN=SPP1 PE=1 SV=1 - [OSTP_HUMAN]                                          | 5.41  | 1 | 1 | 1 | 3  |      |      |      |      | 1.15 | 1.04 | 1.18  | 1.08 | 314  | 35.4  | 4.58 |
| Q02509 | Otoconin-90 OS=Homo sapiens GN=OC90 PE=2 SV=3 - [OC90_HUMAN]                                          | 5.07  | 1 | 1 | 1 | 1  | 1.25 | 1.24 | 0.83 | 0.83 |      | 493  | 53.4  | 4.94 |      |       |      |
| Q6ZRI0 | Otogelin OS=Homo sapiens GN=OTOG PE=2 SV=3 - [OTOG_HUMAN]                                             | 1.47  | 1 | 2 | 2 | 4  | 1.17 | 0.70 | 1.19 | 0.66 | 0.82 | 0.96 | 0.66  | 0.77 | 2925 | 314.6 | 5.91 |
| A6NHN0 | Otolin-1 OS=Homo sapiens GN=OTOL1 PE=3 SV=1 - [OTOL1_HUMAN]                                           | 5.87  | 1 | 2 | 2 | 2  | 0.22 | 0.20 | 0.21 | 0.19 | 0.87 | 0.91 | 0.84  | 0.89 | 477  | 49.4  | 8.34 |
| Q5T2D3 | OTU domain-containing protein 3 OS=Homo sapiens GN=OTUD3 PE=1 SV=1 - [OTUD3_HUMAN]                    | 2.26  | 1 | 1 | 1 | 1  |      |      |      |      | 0.56 | 0.67 | 1.09  | 1.29 | 398  | 45.1  | 8.29 |
| Q8TE49 | OTU domain-containing protein 7A OS=Homo sapiens GN=OTUD7A PE=1 SV=1 - [OTU7A_HUMAN]                  | 1.30  | 1 | 1 | 1 | 1  | 0.46 | 0.44 | 0.43 | 0.42 |      | 926  | 100.6 | 8.40 |      |       |      |
| Q86UD1 | Out at first protein homolog OS=Homo sapiens GN=OAF PE=2 SV=1 - [OAF_HUMAN]                           | 23.44 | 1 | 4 | 4 | 19 | 0.90 | 0.91 | 0.93 | 0.94 | 1.13 | 1.12 | 1.02  | 1.02 | 273  | 30.7  | 6.84 |
| Q9ULJ1 | Outer dense fiber protein 2-like OS=Homo sapiens GN=ODF2L PE=2 SV=2 - [ODF2L_HUMAN]                   | 3.77  | 1 | 2 | 2 | 3  | 0.86 | 0.76 | 0.95 | 0.85 | 0.90 | 0.90 | 1.06  | 1.10 | 636  | 73.7  | 6.48 |
| Q8IXM7 | Outer dense fiber protein 3-like protein 1 OS=Homo sapiens GN=ODF3L1 PE=2 SV=1 - [OD3L1_HUMAN]        | 5.84  | 1 | 1 | 1 | 1  |      |      |      |      | 0.80 | 1.00 | 0.64  | 0.80 | 274  | 31.0  | 9.54 |
| Q12889 | Oviduct-specific glycoprotein OS=Homo sapiens GN=OVGP1 PE=2 SV=1 - [OVGP1_HUMAN]                      | 2.06  | 1 | 1 | 1 | 1  | 1.54 | 2.17 | 1.55 | 2.18 |      | 678  | 75.4  | 8.78 |      |       |      |
| Q7RTY7 | Ovochymase-1 OS=Homo sapiens GN=OVCH1 PE=2 SV=2 - [OVCH1_HUMAN]                                       | 5.20  | 1 | 4 | 4 | 8  | 1.50 | 1.54 | 1.44 | 1.49 | 1.02 | 0.95 | 0.99  | 0.92 | 1134 | 125.0 | 8.32 |
| Q7RTZ1 | Ovochymase-2 OS=Homo sapiens GN=OVCH2 PE=1 SV=2 - [OVCH2_HUMAN]                                       | 3.37  | 1 | 2 | 2 | 4  | 3.31 | 2.11 | 1.28 | 0.93 | 1.17 | 1.43 | 1.29  | 1.66 | 564  | 62.6  | 7.43 |
| Q6IE37 | Ovostatin homolog 1 OS=Homo sapiens GN=OVOS1 PE=2 SV=2 - [OVOS1_HUMAN]                                | 1.18  | 1 | 1 | 2 | 4  |      |      |      |      | 0.57 | 0.98 | 0.52  | 0.91 | 1185 | 134.4 | 5.29 |
| Q6IE36 | Ovostatin homolog 2 OS=Homo sapiens GN=OVOS2 PE=2 SV=2 - [OVOS2_HUMAN]                                | 2.58  | 1 | 1 | 1 | 1  |      |      |      |      | 0.74 | 0.88 | 0.83  | 0.99 | 1432 | 161.1 | 5.27 |
| Q8N573 | Oxidation resistance protein 1 OS=Homo sapiens GN=OXR1 PE=1 SV=2 - [OXR1_HUMAN]                       | 4.00  | 1 | 2 | 2 | 3  | 0.91 | 0.60 | 0.82 | 0.54 | 1.31 | 1.37 | 1.23  | 1.28 | 874  | 97.9  | 5.47 |
| P56715 | Oxygen-regulated protein 1 OS=Homo sapiens GN=RP1 PE=1 SV=1 - [RP1_HUMAN]                             | 0.37  | 1 | 1 | 1 | 1  |      |      |      |      | 0.86 | 0.51 |       |      | 2156 | 240.5 | 5.80 |
| Q9BXW6 | Oxysterol-binding protein-related protein 1 OS=Homo sapiens GN=OSBPL1A PE=1 SV=2 - [OSBL1_HUMAN]      | 3.16  | 1 | 1 | 1 | 1  | 1.19 | 1.00 | 1.31 | 1.11 |      |      |       |      | 950  | 108.4 | 6.38 |
| Q9H1P3 | Oxysterol-binding protein-related protein 2 OS=Homo sapiens GN=OSBPL2 PE=1 SV=1 - [OSBL2_HUMAN]       | 10.00 | 1 | 2 | 2 | 3  | 0.14 | 0.32 | 1.38 | 3.12 | 0.85 | 1.21 | 0.75  | 1.08 | 480  | 55.2  | 6.35 |
| Q9H4L5 | Oxysterol-binding protein-related protein 3 OS=Homo sapiens GN=OSBPL3 PE=1 SV=1 - [OSBL3_HUMAN]       | 1.24  | 1 | 1 | 1 | 1  | 0.82 | 0.95 | 1.03 | 1.20 |      |      |       |      | 887  | 101.2 | 6.87 |



|        |                                                                                                                       |       |   |    |    |     |      |      |      |      |      |      |      |      |      |       |       |
|--------|-----------------------------------------------------------------------------------------------------------------------|-------|---|----|----|-----|------|------|------|------|------|------|------|------|------|-------|-------|
| Q9NR12 | PDZ and LIM domain protein 7 OS=Homo sapiens<br>GN=PDLIM7 PE=1 SV=1 - [PDLI7_HUMAN]                                   | 19.47 | 1 | 7  | 7  | 29  | 0.91 | 0.88 | 0.96 | 0.93 | 1.30 | 1.23 | 1.23 | 1.22 | 457  | 49.8  | 8.41  |
| O15018 | PDZ domain-containing protein 2 OS=Homo sapiens<br>GN=PDZD2 PE=1 SV=4 - [PDZD2_HUMAN]                                 | 0.56  | 1 | 1  | 2  | 2   | 1.37 | 1.34 | 1.30 | 1.28 |      |      |      |      | 2839 | 301.5 | 7.43  |
| Q76G19 | PDZ domain-containing protein 4 OS=Homo sapiens<br>GN=PDZD4 PE=2 SV=1 - [PDZD4_HUMAN]                                 | 2.21  | 1 | 2  | 2  | 3   |      |      |      |      | 0.68 | 0.86 | 0.70 | 0.91 | 769  | 86.1  | 6.13  |
| Q9H6Y5 | PDZ domain-containing protein MAGIX OS=Homo sapiens<br>GN=MAGIX PE=1 SV=3 - [MAGIX_HUMAN]                             | 7.78  | 1 | 1  | 2  | 2   |      |      |      |      | 1.00 | 0.98 | 1.21 | 1.19 | 334  | 35.2  | 10.81 |
| Q96RV3 | Pecanex-like protein 1 OS=Homo sapiens GN=PCNX PE=2<br>SV=2 - [PCX1_HUMAN]                                            | 0.81  | 1 | 1  | 1  | 1   |      |      |      |      | 1.06 | 1.18 | 1.30 | 1.43 | 2341 | 258.5 | 7.21  |
| A6NKB5 | Pecanex-like protein 2 OS=Homo sapiens GN=PCNXL2 PE=1<br>SV=3 - [PCX2_HUMAN]                                          | 0.33  | 1 | 1  | 1  | 1   | 0.83 | 0.96 | 0.84 | 0.97 |      |      |      |      | 2137 | 237.1 | 6.76  |
| Q63HM2 | Pecanex-like protein C14orf135 OS=Homo sapiens<br>GN=C14orf135 PE=2 SV=4 - [CN135_HUMAN]                              | 1.45  | 1 | 1  | 1  | 3   | 0.79 | 1.36 | 1.30 | 2.24 |      |      |      |      | 1172 | 132.6 | 6.29  |
| O75127 | Pentatricopeptide repeat-containing protein 1 OS=Homo<br>sapiens GN=PTCD1 PE=1 SV=2 - [PTCD1_HUMAN]                   | 7.00  | 1 | 2  | 2  | 3   | 1.34 | 1.58 | 1.19 | 1.42 |      |      |      |      | 700  | 78.8  | 8.59  |
| Q8WV60 | Pentatricopeptide repeat-containing protein 2 OS=Homo<br>sapiens GN=PTCD2 PE=2 SV=3 - [PTCD2_HUMAN]                   | 4.38  | 1 | 1  | 1  | 4   | 0.94 | 0.98 | 0.85 | 0.90 | 0.82 | 0.93 | 0.71 | 0.80 | 388  | 43.9  | 9.23  |
| P26022 | Pentraxin-related protein PTX3 OS=Homo sapiens GN=PTX3<br>PE=1 SV=3 - [PTX3_HUMAN]                                    | 17.06 | 1 | 4  | 4  | 6   | 1.00 | 1.14 | 1.00 | 1.07 |      |      |      |      | 381  | 41.9  | 5.01  |
| Q6UXB8 | Peptidase inhibitor 16 OS=Homo sapiens GN=PI16 PE=1<br>SV=1 - [PI16_HUMAN]                                            | 27.86 | 1 | 10 | 10 | 77  | 1.07 | 0.95 | 0.94 | 0.85 | 1.04 | 1.08 | 0.76 | 0.75 | 463  | 49.4  | 5.39  |
| Q9UGC7 | Peptide chain release factor 1-like, mitochondrial OS=Homo<br>sapiens GN=MTRF1L PE=1 SV=1 - [RF1ML_HUMAN]             | 3.68  | 1 | 1  | 1  | 1   | 1.27 | 1.49 | 1.27 | 1.50 |      |      |      |      | 380  | 43.6  | 8.34  |
| Q9HBH1 | Peptide deformylase, mitochondrial OS=Homo sapiens<br>GN=PDF PE=1 SV=1 - [DEFM_HUMAN]                                 | 15.64 | 1 | 2  | 2  | 2   |      |      |      |      | 0.86 | 1.01 | 0.67 | 0.79 | 243  | 27.0  | 9.16  |
| Q96IV0 | Peptide-N(4)-(N-acetyl-beta-glucosaminy)l asparagine amidase<br>OS=Homo sapiens GN=NGLY1 PE=1 SV=1 -<br>[NGLY1_HUMAN] | 1.68  | 1 | 1  | 1  | 3   | 1.40 | 1.28 | 1.35 | 1.25 | 1.59 | 1.71 | 1.43 | 1.54 | 654  | 74.3  | 6.89  |
| O75594 | Peptidoglycan recognition protein 1 OS=Homo sapiens<br>GN=PGLYRP1 PE=1 SV=1 - [PGRP1_HUMAN]                           | 15.82 | 1 | 2  | 2  | 7   | 1.23 | 1.22 | 1.37 | 1.38 | 1.19 | 1.30 | 1.22 | 1.30 | 196  | 21.7  | 8.59  |
| P19021 | Peptidyl-glycine alpha-amidating monooxygenase OS=Homo<br>sapiens GN=PAM PE=1 SV=2 - [AMD_HUMAN]                      | 6.37  | 1 | 6  | 6  | 24  | 1.24 | 1.37 | 1.33 | 1.43 | 1.11 | 0.73 | 1.00 | 0.81 | 973  | 108.3 | 6.42  |
| P62937 | Peptidyl-prolyl cis-trans isomerase A OS=Homo sapiens<br>GN=PPIA PE=1 SV=2 - [PPIA_HUMAN]                             | 67.88 | 3 | 8  | 10 | 113 | 0.94 | 0.88 | 0.89 | 0.88 | 0.96 | 1.04 | 1.00 | 1.03 | 165  | 18.0  | 7.81  |
| A2BFH1 | Peptidyl-prolyl cis-trans isomerase A-like 4G OS=Homo<br>sapiens GN=PPIAL4G PE=2 SV=1 - [PAL4G_HUMAN]                 | 20.73 | 1 | 1  | 2  | 8   | 1.09 | 1.31 | 1.21 | 1.46 |      |      |      |      | 164  | 18.2  | 9.06  |
| P23284 | Peptidyl-prolyl cis-trans isomerase B OS=Homo sapiens<br>GN=PPIB PE=1 SV=2 - [PPIB_HUMAN]                             | 42.59 | 2 | 9  | 10 | 35  | 0.95 | 0.93 | 0.99 | 0.90 | 0.99 | 1.11 | 0.98 | 1.07 | 216  | 23.7  | 9.41  |
| P45877 | Peptidyl-prolyl cis-trans isomerase C OS=Homo sapiens<br>GN=PPIC PE=1 SV=1 - [PPIC_HUMAN]                             | 6.60  | 2 | 1  | 2  | 2   |      |      |      |      | 1.64 | 1.84 | 1.39 | 1.56 | 212  | 22.7  | 8.40  |
| Q6UX04 | Peptidyl-prolyl cis-trans isomerase CWC27 homolog<br>OS=Homo sapiens GN=CWC27 PE=1 SV=1 -<br>[CWC27_HUMAN]            | 2.75  | 1 | 1  | 1  | 3   | 0.96 | 1.01 | 1.01 | 1.06 |      |      |      |      | 472  | 53.8  | 5.80  |
| Q08752 | Peptidyl-prolyl cis-trans isomerase D OS=Homo sapiens<br>GN=PPID PE=1 SV=3 - [PPID_HUMAN]                             | 14.86 | 2 | 2  | 3  | 3   |      |      |      |      | 0.74 | 0.97 | 0.75 | 0.88 | 370  | 40.7  | 7.21  |
| Q9UNP9 | Peptidyl-prolyl cis-trans isomerase E OS=Homo sapiens<br>GN=PPIE PE=1 SV=1 - [PPIE_HUMAN]                             | 3.99  | 1 | 1  | 1  | 2   |      |      |      |      | 1.05 | 0.17 | 1.18 | 0.19 | 301  | 33.4  | 5.60  |
| Q96AY3 | Peptidyl-prolyl cis-trans isomerase FKBP10 OS=Homo<br>sapiens GN=FKBP10 PE=1 SV=1 - [FKB10_HUMAN]                     | 2.41  | 1 | 1  | 1  | 1   |      |      |      |      | 0.78 | 0.89 | 0.84 | 0.95 | 582  | 64.2  | 5.62  |
| P62942 | Peptidyl-prolyl cis-trans isomerase FKBP1A OS=Homo<br>sapiens GN=FKBP1A PE=1 SV=2 - [FKB1A_HUMAN]                     | 25.00 | 1 | 2  | 2  | 14  | 0.84 | 0.78 | 0.77 | 0.72 | 1.15 | 1.06 | 1.07 | 1.01 | 108  | 11.9  | 8.16  |
| P26885 | Peptidyl-prolyl cis-trans isomerase FKBP2 OS=Homo sapiens<br>GN=FKBP2 PE=1 SV=2 - [FKBP2_HUMAN]                       | 49.30 | 1 | 5  | 5  | 14  |      |      |      |      | 1.50 | 1.56 | 1.39 | 1.34 | 142  | 15.6  | 9.13  |
| Q00688 | Peptidyl-prolyl cis-trans isomerase FKBP3 OS=Homo sapiens<br>GN=FKBP3 PE=1 SV=1 - [FKBP3_HUMAN]                       | 3.57  | 1 | 1  | 1  | 3   |      |      |      |      | 1.09 | 0.82 | 1.00 | 0.74 | 224  | 25.2  | 9.28  |



|        |                                                                                                                       |       |   |    |    |    |      |      |      |      |      |      |      |      |      |       |      |
|--------|-----------------------------------------------------------------------------------------------------------------------|-------|---|----|----|----|------|------|------|------|------|------|------|------|------|-------|------|
| Q13451 | Peptidyl-prolyl cis-trans isomerase FKBP5 OS=Homo sapiens GN=FKBP5 PE=1 SV=2 - [FKBP5_HUMAN]                          | 3.06  | 1 | 1  | 1  | 1  | 0.74 | 0.71 | 0.75 | 0.73 |      | 457  | 51.2 | 5.90 |      |       |      |
| Q9Y680 | Peptidyl-prolyl cis-trans isomerase FKBP7 OS=Homo sapiens GN=FKBP7 PE=1 SV=1 - [FKBP7_HUMAN]                          | 4.63  | 1 | 1  | 1  | 1  |      |      |      |      | 0.95 | 0.98 | 1.11 | 1.14 | 259  | 30.0  | 6.54 |
| Q13526 | Peptidyl-prolyl cis-trans isomerase NIMA-interacting 1 OS=Homo sapiens GN=PIN1 PE=1 SV=1 - [PIN1_HUMAN]               | 9.20  | 1 | 1  | 1  | 3  |      |      |      |      | 1.33 | 1.39 | 1.07 | 1.13 | 163  | 18.2  | 8.82 |
| Q9Y3C6 | Peptidyl-prolyl cis-trans isomerase-like 1 OS=Homo sapiens GN=PPIL1 PE=1 SV=1 - [PPIL1_HUMAN]                         | 6.63  | 1 | 1  | 1  | 1  |      |      |      |      | 2.10 | 1.74 | 1.27 | 1.05 | 166  | 18.2  | 7.99 |
| Q13356 | Peptidyl-prolyl cis-trans isomerase-like 2 OS=Homo sapiens GN=PPIL2 PE=1 SV=1 - [PPIL2_HUMAN]                         | 3.27  | 1 | 1  | 1  | 1  |      |      |      |      | 1.07 | 1.26 | 0.94 | 1.10 | 520  | 58.8  | 8.78 |
| Q8IXY8 | Peptidyl-prolyl cis-trans isomerase-like 6 OS=Homo sapiens GN=PPIL6 PE=2 SV=1 - [PPIL6_HUMAN]                         | 1.93  | 1 | 1  | 1  | 1  |      |      |      |      | 0.46 | 0.84 | 0.67 | 1.21 | 311  | 35.2  | 7.02 |
| Q96BP3 | Peptidylprolyl isomerase domain and WD repeat-containing protein 1 OS=Homo sapiens GN=PPWD1 PE=1 SV=1 - [PPWD1_HUMAN] | 1.39  | 1 | 1  | 1  | 1  |      |      |      |      | 1.01 | 1.03 | 0.98 | 0.99 | 646  | 73.5  | 7.15 |
| P55201 | Peregrin OS=Homo sapiens GN=BRPF1 PE=1 SV=2 - [BRPF1_HUMAN]                                                           | 2.22  | 1 | 2  | 2  | 2  |      |      |      |      | 4.09 | 4.36 | 1.18 | 1.25 | 1214 | 137.4 | 7.93 |
| Q9BXM0 | Periaxin OS=Homo sapiens GN=PRX PE=1 SV=2 - [PRAX_HUMAN]                                                              | 1.10  | 1 | 2  | 2  | 2  | 1.00 | 0.94 | 1.29 | 1.22 | 0.96 | 1.07 | 0.94 | 1.04 | 1461 | 154.8 | 7.50 |
| O95613 | Pericentrin OS=Homo sapiens GN=PCNT PE=1 SV=4 - [PCNT_HUMAN]                                                          | 0.78  | 1 | 2  | 2  | 3  |      |      |      |      | 0.29 | 0.23 | 1.18 | 0.93 | 3336 | 377.8 | 5.55 |
| Q15154 | Pericentriolar material 1 protein OS=Homo sapiens GN=PCM1 PE=1 SV=4 - [PCM1_HUMAN]                                    | 3.11  | 4 | 2  | 3  | 98 |      |      |      |      | 0.92 | 0.88 | 0.67 | 0.88 | 2024 | 228.4 | 5.02 |
| O60664 | Perilipin-3 OS=Homo sapiens GN=PLIN3 PE=1 SV=3 - [PLIN3_HUMAN]                                                        | 4.38  | 1 | 1  | 1  | 1  |      |      |      |      | 2.01 | 1.81 | 1.84 | 1.66 | 434  | 47.0  | 5.44 |
| P56645 | Period circadian protein homolog 3 OS=Homo sapiens GN=PER3 PE=2 SV=4 - [PER3_HUMAN]                                   | 1.58  | 1 | 1  | 1  | 1  | 0.90 | 0.91 | 0.93 | 0.95 |      |      |      |      | 1201 | 131.8 | 6.89 |
| Q15063 | Periostin OS=Homo sapiens GN=POSTN PE=1 SV=2 - [POSTN_HUMAN]                                                          | 24.28 | 1 | 17 | 17 | 55 | 0.87 | 0.83 | 0.85 | 0.84 | 0.61 | 0.72 | 0.64 | 0.73 | 836  | 93.3  | 7.53 |
| O95153 | Peripheral-type benzodiazepine receptor-associated protein 1 OS=Homo sapiens GN=BZRAP1 PE=1 SV=2 - [RIMB1_HUMAN]      | 1.08  | 1 | 1  | 1  | 1  | 0.66 | 0.83 | 0.80 | 1.01 |      |      |      |      | 1857 | 199.9 | 5.11 |
| P23942 | Peripherin-2 OS=Homo sapiens GN=PRPH2 PE=1 SV=1 - [PRPH2_HUMAN]                                                       | 2.02  | 1 | 1  | 1  | 1  | 5.02 |      | 1.51 |      |      |      |      |      | 346  | 39.2  | 8.18 |
| O60437 | Periplakin OS=Homo sapiens GN=PPL PE=1 SV=4 - [PEPL_HUMAN]                                                            | 1.88  | 1 | 3  | 3  | 4  | 0.65 | 0.70 | 0.67 | 0.72 | 0.68 | 0.75 | 0.74 | 0.81 | 1756 | 204.6 | 5.60 |
| Q92626 | Peroxidasin homolog OS=Homo sapiens GN=PXDN PE=1 SV=2 - [PXDN_HUMAN]                                                  | 1.49  | 1 | 2  | 2  | 3  | 1.71 | 4.04 | 1.45 | 1.54 |      |      |      |      | 1479 | 165.2 | 7.17 |
| A1KZ92 | Peroxidasin-like protein OS=Homo sapiens GN=PXDNL PE=2 SV=3 - [PXDNL_HUMAN]                                           | 0.96  | 1 | 1  | 1  | 1  | 1.06 | 0.94 | 1.08 | 0.97 |      |      |      |      | 1463 | 163.6 | 7.43 |
| Q06830 | Peroxiredoxin-1 OS=Homo sapiens GN=PRDX1 PE=1 SV=1 - [PRDX1_HUMAN]                                                    | 13.57 | 1 | 1  | 2  | 6  |      |      |      |      | 0.63 | 0.90 | 0.90 | 1.30 | 199  | 22.1  | 8.13 |
| P32119 | Peroxiredoxin-2 OS=Homo sapiens GN=PRDX2 PE=1 SV=5 - [PRDX2_HUMAN]                                                    | 40.91 | 1 | 6  | 7  | 29 | 0.66 | 0.62 | 0.61 | 0.59 | 0.71 | 0.74 | 0.63 | 0.65 | 198  | 21.9  | 5.97 |
| P30044 | Peroxiredoxin-5, mitochondrial OS=Homo sapiens GN=PRDX5 PE=1 SV=4 - [PRDX5_HUMAN]                                     | 35.98 | 1 | 5  | 5  | 24 | 0.75 | 0.72 | 0.81 | 0.78 | 0.94 | 1.05 | 0.87 | 1.01 | 214  | 22.1  | 8.70 |
| P30041 | Peroxiredoxin-6 OS=Homo sapiens GN=PRDX6 PE=1 SV=3 - [PRDX6_HUMAN]                                                    | 46.88 | 1 | 8  | 8  | 25 | 0.77 | 0.67 | 0.79 | 0.73 | 0.95 | 0.93 | 0.91 | 0.94 | 224  | 25.0  | 6.38 |
| O15254 | Peroxisomal acyl-coenzyme A oxidase 3 OS=Homo sapiens GN=ACOX3 PE=1 SV=2 - [ACOX3_HUMAN]                              | 3.00  | 1 | 1  | 1  | 2  |      |      |      |      | 2.59 | 1.60 | 2.28 | 1.34 | 700  | 77.6  | 7.25 |
| Q08426 | Peroxisomal bifunctional enzyme OS=Homo sapiens GN=EHHADH PE=1 SV=3 - [ECHP_HUMAN]                                    | 3.32  | 1 | 1  | 1  | 2  |      |      |      |      | 1.08 | 0.88 | 0.62 | 0.50 | 723  | 79.4  | 9.14 |
| P40855 | Peroxisomal biogenesis factor 19 OS=Homo sapiens GN=PEX19 PE=1 SV=1 - [PEX19_HUMAN]                                   | 3.34  | 1 | 1  | 1  | 1  | 1.24 | 1.27 | 1.27 | 1.32 |      |      |      |      | 299  | 32.8  | 4.34 |
| Q9UKG9 | Peroxisomal carnitine O-octanoyltransferase OS=Homo sapiens GN=CROT PE=1 SV=2 - [OCTC_HUMAN]                          | 1.31  | 1 | 1  | 1  | 2  | 0.96 | 0.98 | 0.79 | 0.81 |      |      |      |      | 612  | 70.1  | 7.08 |

|        |                                                                                                                                   |       |   |   |   |    |      |      |      |      |      |      |      |      |      |       |       |
|--------|-----------------------------------------------------------------------------------------------------------------------------------|-------|---|---|---|----|------|------|------|------|------|------|------|------|------|-------|-------|
| Q92968 | Peroxisomal membrane protein PEX13 OS=Homo sapiens GN=PEX13 PE=1 SV=2 - [PEX13_HUMAN]                                             | 1.74  | 1 | 1 | 1 | 1  |      |      |      |      | 0.86 | 0.64 | 0.77 | 0.58 | 403  | 44.1  | 8.05  |
| O43808 | Peroxisomal membrane protein PMP34 OS=Homo sapiens GN=SLC25A17 PE=1 SV=1 - [PM34_HUMAN]                                           | 3.91  | 1 | 1 | 1 | 1  | 0.27 | 0.19 | 0.30 | 0.21 |      |      |      |      | 307  | 34.5  | 10.08 |
| P51659 | Peroxisomal multifunctional enzyme type 2 OS=Homo sapiens GN=HSD17B4 PE=1 SV=3 - [DHB4_HUMAN]                                     | 1.90  | 1 | 1 | 1 | 1  | 0.97 | 1.13 | 1.03 | 1.20 |      |      |      |      | 736  | 79.6  | 8.84  |
| Q9BQG2 | Peroxisomal NADH pyrophosphatase NUDT12 OS=Homo sapiens GN=NUDT12 PE=1 SV=1 - [NUDT12_HUMAN]                                      | 3.46  | 1 | 1 | 1 | 1  | 0.55 |      | 0.77 |      |      |      |      |      | 462  | 52.0  | 6.83  |
| Q9P0Z9 | Peroxisomal sarcosine oxidase OS=Homo sapiens GN=PIPOX PE=2 SV=2 - [SOX_HUMAN]                                                    | 3.08  | 1 | 1 | 1 | 4  | 1.10 | 0.96 | 1.28 | 1.12 |      |      |      |      | 390  | 44.0  | 8.41  |
| O43933 | Peroxisome biogenesis factor 1 OS=Homo sapiens GN=PEX1 PE=1 SV=1 - [PEX1_HUMAN]                                                   | 3.12  | 1 | 2 | 2 | 3  | 0.88 | 1.02 | 0.90 | 1.05 |      |      |      |      | 1283 | 142.8 | 6.33  |
| O60683 | Peroxisome biogenesis factor 10 OS=Homo sapiens GN=PEX10 PE=1 SV=1 - [PEX10_HUMAN]                                                | 8.59  | 1 | 1 | 1 | 3  | 1.14 | 0.82 | 1.12 | 0.82 |      |      |      |      | 326  | 37.0  | 9.99  |
| Q07869 | Peroxisome proliferator-activated receptor alpha OS=Homo sapiens GN=PPARA PE=1 SV=2 - [PPARA_HUMAN]                               | 4.06  | 1 | 1 | 1 | 1  | 1.01 | 1.11 | 1.20 | 1.32 |      |      |      |      | 468  | 52.2  | 6.25  |
| Q5VV67 | Peroxisome proliferator-activated receptor gamma coactivator-related protein 1 OS=Homo sapiens GN=PPRC1 PE=1 SV=1 - [PPRC1_HUMAN] | 2.34  | 1 | 2 | 2 | 3  | 0.96 | 1.14 | 0.89 | 1.06 | 0.86 | 0.74 | 0.95 | 0.82 | 1664 | 177.4 | 6.51  |
| P37231 | Peroxisome proliferator-activated receptor gamma OS=Homo sapiens GN=PPARG PE=1 SV=3 - [PPARG_HUMAN]                               | 3.76  | 1 | 1 | 1 | 1  |      |      |      |      | 0.83 | 1.22 | 0.96 | 1.40 | 505  | 57.6  | 5.94  |
| O00541 | Pescadillo homolog OS=Homo sapiens GN=PES1 PE=1 SV=1 - [PESC_HUMAN]                                                               | 2.72  | 1 | 1 | 2 | 2  | 0.80 | 0.82 | 0.82 | 0.85 |      |      |      |      | 588  | 68.0  | 7.33  |
| Q9BQI7 | PH and SEC7 domain-containing protein 2 OS=Homo sapiens GN=PSD2 PE=2 SV=3 - [PSD2_HUMAN]                                          | 6.10  | 1 | 2 | 2 | 2  | 0.71 | 0.52 |      |      | 1.79 | 1.40 | 1.84 | 1.44 | 771  | 84.6  | 5.19  |
| Q9NY10 | PH and SEC7 domain-containing protein 3 OS=Homo sapiens GN=PSD3 PE=1 SV=2 - [PSD3_HUMAN]                                          | 2.10  | 1 | 1 | 1 | 8  |      |      |      |      | 1.43 | 1.46 | 1.03 | 1.05 | 1048 | 116.0 | 5.99  |
| Q8NDX1 | PH and SEC7 domain-containing protein 4 OS=Homo sapiens GN=PSD4 PE=1 SV=2 - [PSD4_HUMAN]                                          | 2.75  | 1 | 1 | 1 | 1  | 1.22 | 0.78 | 1.29 | 0.83 |      |      |      |      | 1056 | 116.2 | 5.48  |
| Q6ZVD8 | PH domain leucine-rich repeat-containing protein phosphatase 2 OS=Homo sapiens GN=PHLP2 PE=1 SV=3 - [PHLP2_HUMAN]                 | 1.13  | 1 | 1 | 1 | 1  | 0.82 | 0.82 | 0.86 | 0.86 |      |      |      |      | 1323 | 146.7 | 5.71  |
| Q8WWQ0 | PH-interacting protein OS=Homo sapiens GN=PHIP PE=1 SV=2 - [PHIP_HUMAN]                                                           | 1.37  | 1 | 1 | 1 | 1  | 0.74 | 0.62 | 0.85 | 0.72 |      |      |      |      | 1821 | 206.6 | 8.85  |
| Q8WUB8 | PHD finger protein 10 OS=Homo sapiens GN=PHF10 PE=1 SV=3 - [PHF10_HUMAN]                                                          | 12.25 | 1 | 2 | 2 | 3  |      |      |      |      | 1.21 | 0.99 | 0.80 | 0.66 | 498  | 56.0  | 6.62  |
| Q9BVI0 | PHD finger protein 20 OS=Homo sapiens GN=PHF20 PE=1 SV=2 - [PHF20_HUMAN]                                                          | 0.99  | 1 | 1 | 1 | 1  |      |      |      |      | 0.62 | 0.67 | 0.72 | 0.78 | 1012 | 115.3 | 6.99  |
| A8MW92 | PHD finger protein 20-like protein 1 OS=Homo sapiens GN=PHF20L1 PE=1 SV=2 - [P20L1_HUMAN]                                         | 4.62  | 1 | 2 | 2 | 2  | 1.68 | 1.45 | 2.01 | 1.76 | 0.73 | 0.79 | 0.52 | 0.56 | 1017 | 114.9 | 6.83  |
| Q8IWS0 | PHD finger protein 6 OS=Homo sapiens GN=PHF6 PE=1 SV=1 - [PHF6_HUMAN]                                                             | 5.21  | 1 | 1 | 1 | 1  |      |      |      |      | 0.67 |      | 1.16 | 365  | 41.3 | 8.68  |       |
| O95363 | Phenylalanine--tRNA ligase, mitochondrial OS=Homo sapiens GN=FARS2 PE=1 SV=1 - [SYFM_HUMAN]                                       | 2.22  | 1 | 1 | 1 | 1  | 0.86 | 0.93 | 0.67 | 0.73 |      |      |      |      | 451  | 52.3  | 7.46  |
| Q13794 | Phorbol-12-myristate-13-acetate-induced protein 1 OS=Homo sapiens GN=PMAIP1 PE=1 SV=1 - [APR_HUMAN]                               | 24.07 | 1 | 1 | 1 | 1  |      |      |      |      | 1.15 | 1.38 | 1.03 | 1.23 | 54   | 6.0   | 10.29 |
| P78562 | Phosphate-regulating neutral endopeptidase OS=Homo sapiens GN=PHEX PE=1 SV=1 - [PHEX_HUMAN]                                       | 1.47  | 1 | 1 | 1 | 1  | 1.48 | 1.31 | 1.24 | 1.10 |      |      |      |      | 749  | 86.4  | 8.76  |
| Q92539 | Phosphatidate phosphatase LPIN2 OS=Homo sapiens GN=LPIN2 PE=1 SV=1 - [LPIN2_HUMAN]                                                | 1.34  | 1 | 1 | 1 | 3  | 0.91 | 1.14 | 0.59 | 0.74 |      |      |      |      | 896  | 99.3  | 5.33  |
| Q5VZY2 | Phosphatidate phosphatase PPAPDC1A OS=Homo sapiens GN=PPAPDC1A PE=1 SV=2 - [PPC1A_HUMAN]                                          | 8.12  | 1 | 1 | 1 | 1  |      |      |      |      | 0.27 | 0.51 |      |      | 271  | 30.4  | 8.18  |
| P04180 | Phosphatidylcholine-sterol acyltransferase OS=Homo sapiens GN=LCAT PE=1 SV=1 - [LCAT_HUMAN]                                       | 8.41  | 1 | 3 | 3 | 45 | 1.04 | 1.07 | 1.03 | 1.06 | 0.87 | 0.79 | 0.88 | 0.82 | 440  | 49.5  | 6.11  |
| Q86VZ5 | Phosphatidylcholine:ceramide cholinephosphotransferase 1 OS=Homo sapiens GN=SGMS1 PE=1 SV=2 - [SMS1_HUMAN]                        | 1.91  | 1 | 1 | 1 | 2  |      |      |      |      | 1.14 | 1.36 | 0.91 | 1.03 | 419  | 49.2  | 8.40  |

|        |                                                                                                                                   |       |   |    |    |     |      |      |      |      |      |      |      |      |      |       |      |
|--------|-----------------------------------------------------------------------------------------------------------------------------------|-------|---|----|----|-----|------|------|------|------|------|------|------|------|------|-------|------|
| Q8NHU3 | Phosphatidylcholine:ceramide cholinephosphotransferase 2 OS=Homo sapiens GN=SGMS2 PE=1 SV=1 - [SMS2_HUMAN]                        | 2.47  | 1 | 1  | 1  | 1   |      |      |      |      | 0.85 | 0.83 | 0.92 | 0.89 | 365  | 42.3  | 8.81 |
| P30086 | Phosphatidylethanolamine-binding protein 1 OS=Homo sapiens GN=PEBP1 PE=1 SV=3 - [PEBP1_HUMAN]                                     | 18.18 | 1 | 3  | 3  | 5   | 0.93 | 0.86 | 0.89 | 0.83 | 0.95 | 0.87 | 0.89 | 0.82 | 187  | 21.0  | 7.53 |
| Q96S96 | Phosphatidylethanolamine-binding protein 4 OS=Homo sapiens GN=PEBP4 PE=1 SV=3 - [PEBP4_HUMAN]                                     | 7.93  | 1 | 2  | 2  | 7   | 0.90 | 0.94 | 0.86 | 0.91 | 0.93 | 0.97 | 0.87 | 0.88 | 227  | 25.7  | 6.54 |
| O00459 | Phosphatidylinositol 3-kinase regulatory subunit beta OS=Homo sapiens GN=PIK3R2 PE=1 SV=2 - [P85B_HUMAN]                          | 0.96  | 1 | 1  | 1  | 1   |      |      |      |      | 0.83 | 0.95 | 0.74 | 0.86 | 728  | 81.5  | 6.43 |
| Q6XPS3 | Phosphatidylinositol 3,4,5-trisphosphate 3-phosphatase TPTE2 OS=Homo sapiens GN=TPTE2 PE=1 SV=2 - [TPTE2_HUMAN]                   | 2.49  | 2 | 1  | 1  | 1   |      |      |      |      | 0.98 | 0.95 | 0.97 | 0.94 | 522  | 61.1  | 8.63 |
| Q92835 | Phosphatidylinositol 3,4,5-trisphosphate 5-phosphatase 1 OS=Homo sapiens GN=INPP5D PE=1 SV=2 - [SHIP1_HUMAN]                      | 4.46  | 1 | 2  | 3  | 6   | 1.24 | 1.35 | 1.27 | 1.38 | 1.14 | 0.26 | 0.69 | 0.15 | 1189 | 133.2 | 7.59 |
| Q8TCU6 | Phosphatidylinositol 3,4,5-trisphosphate-dependent Rac exchanger 1 protein OS=Homo sapiens GN=PREX1 PE=1 SV=3 - [PREX1_HUMAN]     | 0.42  | 1 | 1  | 1  | 1   | 0.64 | 0.58 | 0.69 | 0.64 |      |      |      |      | 1659 | 186.1 | 6.44 |
| P42356 | Phosphatidylinositol 4-kinase alpha OS=Homo sapiens GN=PI4KA PE=1 SV=3 - [PI4KA_HUMAN]                                            | 0.64  | 1 | 1  | 1  | 1   | 1.69 | 1.75 | 1.95 | 2.04 |      |      |      |      | 2044 | 231.2 | 6.87 |
| O00443 | Phosphatidylinositol 4-phosphate 3-kinase C2 domain-containing subunit alpha OS=Homo sapiens GN=PIK3C2A PE=1 SV=2 - [P3C2A_HUMAN] | 1.01  | 1 | 1  | 1  | 3   | 0.89 | 0.84 | 0.48 | 0.45 | 0.88 | 0.92 | 0.82 | 0.86 | 1686 | 190.6 | 8.02 |
| O75747 | Phosphatidylinositol 4-phosphate 3-kinase C2 domain-containing subunit gamma OS=Homo sapiens GN=PIK3C2G PE=1 SV=3 - [P3C2G_HUMAN] | 0.62  | 1 | 1  | 1  | 2   |      |      |      |      | 1.07 | 0.50 | 0.88 | 0.41 | 1445 | 165.6 | 6.93 |
| O14986 | Phosphatidylinositol 4-phosphate 5-kinase type-1 beta OS=Homo sapiens GN=PIP5K1B PE=1 SV=2 - [PI51B_HUMAN]                        | 3.33  | 4 | 1  | 2  | 5   | 3.00 | 2.21 | 0.98 | 0.72 |      |      |      |      | 540  | 61.0  | 6.86 |
| P42338 | Phosphatidylinositol 4,5-bisphosphate 3-kinase catalytic subunit beta isoform OS=Homo sapiens GN=PIK3CB PE=1 SV=1 - [PK3CB_HUMAN] | 1.87  | 1 | 2  | 2  | 4   | 0.91 | 1.48 | 1.02 | 1.54 |      |      |      |      | 1070 | 122.7 | 7.09 |
| Q15735 | Phosphatidylinositol 4,5-bisphosphate 5-phosphatase A OS=Homo sapiens GN=INPP5J PE=1 SV=3 - [PI5PA_HUMAN]                         | 3.78  | 1 | 1  | 1  | 1   | 0.85 | 1.26 | 0.93 | 1.38 |      |      |      |      | 1006 | 107.1 | 9.11 |
| P78356 | Phosphatidylinositol 5-phosphate 4-kinase type-2 beta OS=Homo sapiens GN=PIP4K2B PE=1 SV=1 - [PI42B_HUMAN]                        | 2.64  | 1 | 1  | 1  | 2   |      |      |      |      | 0.60 | 0.57 | 0.82 | 0.78 | 416  | 47.3  | 7.33 |
| Q8TBX8 | Phosphatidylinositol 5-phosphate 4-kinase type-2 gamma OS=Homo sapiens GN=PIP4K2C PE=1 SV=3 - [PI42C_HUMAN]                       | 6.41  | 1 | 1  | 1  | 3   |      |      |      |      | 1.89 | 1.45 | 1.47 | 1.13 | 421  | 47.3  | 6.84 |
| Q13492 | Phosphatidylinositol-binding clathrin assembly protein OS=Homo sapiens GN=PICALM PE=1 SV=2 - [PICAL_HUMAN]                        | 5.06  | 1 | 1  | 1  | 1   | 0.98 | 1.40 | 1.26 | 1.81 |      |      |      |      | 652  | 70.7  | 7.90 |
| P80108 | Phosphatidylinositol-glycan-specific phospholipase D OS=Homo sapiens GN=GPLD1 PE=1 SV=3 - [PHLD_HUMAN]                            | 26.31 | 1 | 18 | 18 | 134 | 1.21 | 1.25 | 1.27 | 1.26 | 1.28 | 1.37 | 1.19 | 1.27 | 840  | 92.3  | 6.37 |
| P36871 | Phosphoglucomutase-1 OS=Homo sapiens GN=PGM1 PE=1 SV=3 - [PGM1_HUMAN]                                                             | 2.85  | 1 | 1  | 1  | 3   | 1.30 | 1.36 | 0.96 | 1.07 |      |      |      |      | 562  | 61.4  | 6.76 |
| P00558 | Phosphoglycerate kinase 1 OS=Homo sapiens GN=PGK1 PE=1 SV=3 - [PGK1_HUMAN]                                                        | 43.17 | 2 | 12 | 12 | 27  | 0.89 | 0.77 | 0.93 | 0.83 | 0.83 | 0.95 | 0.94 | 1.07 | 417  | 44.6  | 8.10 |
| P15259 | Phosphoglycerate mutase 2 OS=Homo sapiens GN=PGAM2 PE=1 SV=3 - [PGAM2_HUMAN]                                                      | 4.35  | 2 | 1  | 1  | 5   | 0.85 | 0.97 | 0.87 | 1.00 | 0.57 | 0.60 | 0.65 | 0.69 | 253  | 28.7  | 8.88 |
| A6NDG6 | Phosphoglycolate phosphatase OS=Homo sapiens GN=PGP PE=1 SV=1 - [PGP_HUMAN]                                                       | 4.98  | 1 | 1  | 1  | 1   | 0.66 | 0.75 | 0.55 | 0.62 |      |      |      |      | 321  | 34.0  | 6.14 |
| Q8WYR1 | Phosphoinositide 3-kinase regulatory subunit 5 OS=Homo sapiens GN=PIK3R5 PE=1 SV=1 - [PI3R5_HUMAN]                                | 1.48  | 1 | 1  | 1  | 1   | 0.93 | 0.99 | 0.89 | 0.95 |      |      |      |      | 880  | 97.3  | 6.74 |
| Q96FE7 | Phosphoinositide-3-kinase-interacting protein 1 OS=Homo sapiens GN=PIK3IP1 PE=1 SV=2 - [P3IP1_HUMAN]                              | 2.66  | 1 | 1  | 1  | 1   | 0.85 | 0.95 | 0.99 | 1.13 |      |      |      |      | 263  | 28.2  | 5.01 |
| Q9Y263 | Phospholipase A-2-activating protein OS=Homo sapiens GN=PLAA PE=1 SV=2 - [PLAP_HUMAN]                                             | 5.16  | 1 | 2  | 2  | 2   |      |      |      |      | 0.72 | 0.63 | 0.75 | 0.66 | 795  | 87.1  | 6.37 |
| Q53H76 | Phospholipase A1 member A OS=Homo sapiens GN=PLA1A PE=2 SV=2 - [PLA1A_HUMAN]                                                      | 4.82  | 1 | 1  | 1  | 4   | 1.01 | 1.01 | 0.99 | 0.99 |      |      |      |      | 456  | 49.7  | 7.37 |
| Q6P1J6 | Phospholipase B1, membrane-associated OS=Homo sapiens GN=PLB1 PE=1 SV=3 - [PLB1_HUMAN]                                            | 0.96  | 1 | 1  | 1  | 1   |      |      |      |      | 1.22 | 1.31 | 1.26 | 1.34 | 1458 | 163.0 | 5.88 |
| Q13393 | Phospholipase D1 OS=Homo sapiens GN=PLD1 PE=1 SV=1 - [PLD1_HUMAN]                                                                 | 0.74  | 1 | 1  | 1  | 6   | 0.76 | 0.49 | 0.64 | 0.42 |      |      |      |      | 1074 | 124.1 | 8.78 |

|        |                                                                                                                          |       |   |    |    |     |      |      |      |      |      |      |      |      |      |       |      |
|--------|--------------------------------------------------------------------------------------------------------------------------|-------|---|----|----|-----|------|------|------|------|------|------|------|------|------|-------|------|
| P55058 | Phospholipid transfer protein OS=Homo sapiens GN=PLTP PE=1 SV=1 - [PLTP_HUMAN]                                           | 41.38 | 1 | 16 | 16 | 113 | 1.06 | 1.03 | 0.88 | 0.89 | 0.79 | 0.74 | 0.97 | 0.94 | 493  | 54.7  | 7.01 |
| Q96CD2 | Phosphopantothenoylcysteine decarboxylase OS=Homo sapiens GN=PPCDC PE=1 SV=2 - [COAC_HUMAN]                              | 9.31  | 1 | 1  | 1  | 1   |      |      |      |      | 1.28 | 1.08 | 1.35 | 1.13 | 204  | 22.4  | 6.10 |
| Q14558 | Phosphoribosyl pyrophosphate synthase-associated protein 1 OS=Homo sapiens GN=PRPSAP1 PE=1 SV=2 - [KPRA_HUMAN]           | 3.93  | 1 | 1  | 1  | 2   | 0.96 | 0.93 | 0.85 | 0.83 |      |      |      |      | 356  | 39.4  | 7.20 |
| O15067 | Phosphoribosylformylglycinamide synthase OS=Homo sapiens GN=PFAS PE=1 SV=4 - [PUR4_HUMAN]                                | 3.29  | 2 | 2  | 3  | 4   | 1.16 | 1.19 | 1.11 | 1.16 |      |      |      |      | 1338 | 144.6 | 5.76 |
| Q93100 | Phosphorylase b kinase regulatory subunit beta OS=Homo sapiens GN=PHKB PE=1 SV=3 - [KPBB_HUMAN]                          | 3.39  | 1 | 3  | 3  | 10  | 0.80 | 0.90 | 0.81 | 0.78 |      |      |      |      | 1093 | 124.8 | 6.95 |
| Q9H4Z3 | Phosphorylated CTD-interacting factor 1 OS=Homo sapiens GN=PCIF1 PE=1 SV=1 - [PCIF1_HUMAN]                               | 2.13  | 1 | 2  | 2  | 4   |      |      |      |      | 0.76 | 0.82 | 1.05 | 1.05 | 704  | 80.6  | 7.42 |
| Q9UMZ3 | Phosphatidylinositol phosphatase PTPRQ OS=Homo sapiens GN=PTPRQ PE=1 SV=2 - [PTPRQ_HUMAN]                                | 0.69  | 1 | 1  | 1  | 1   | 1.10 | 1.07 | 0.95 | 0.92 |      |      |      |      | 2332 | 260.8 | 5.81 |
| Q9Y5X4 | Photoreceptor-specific nuclear receptor OS=Homo sapiens GN=NR2E3 PE=1 SV=1 - [NR2E3_HUMAN]                               | 4.39  | 1 | 1  | 1  | 1   |      |      |      |      | 0.77 | 0.81 | 0.66 | 0.69 | 410  | 44.7  | 7.90 |
| Q0VAA5 | PI-PLC X domain-containing protein 2 OS=Homo sapiens GN=PLCXD2 PE=1 SV=1 - [PLCX2_HUMAN]                                 | 4.26  | 1 | 1  | 1  | 1   |      |      |      |      | 0.30 | 1.26 | 0.60 | 2.53 | 305  | 34.8  | 9.44 |
| Q63HM9 | PI-PLC X domain-containing protein 3 OS=Homo sapiens GN=PLCXD3 PE=2 SV=2 - [PLCX3_HUMAN]                                 | 3.74  | 1 | 1  | 1  | 1   |      |      |      |      | 0.69 | 0.97 | 0.69 | 0.98 | 321  | 36.3  | 6.29 |
| Q8N414 | PiggyBac transposable element-derived protein 5 OS=Homo sapiens GN=PGBD5 PE=2 SV=3 - [PGBD5_HUMAN]                       | 14.29 | 1 | 3  | 3  | 3   | 1.26 | 1.06 | 1.52 | 1.14 | 0.71 | 0.62 | 1.04 | 0.91 | 455  | 51.6  | 9.31 |
| P36955 | Pigment epithelium-derived factor OS=Homo sapiens GN=SERPINF1 PE=1 SV=4 - [PEDF_HUMAN]                                   | 54.07 | 1 | 21 | 21 | 209 | 0.94 | 0.91 | 1.02 | 0.96 | 0.84 | 0.89 | 0.84 | 0.89 | 418  | 46.3  | 6.38 |
| Q9NWS0 | PIH1 domain-containing protein 1 OS=Homo sapiens GN=PIH1D1 PE=1 SV=1 - [PIHD1_HUMAN]                                     | 6.21  | 1 | 1  | 1  | 2   | 1.05 | 1.05 | 1.01 | 1.02 |      |      |      |      | 290  | 32.3  | 5.14 |
| Q8WWB5 | PIH1 domain-containing protein 2 OS=Homo sapiens GN=PIH1D2 PE=2 SV=1 - [PIHD2_HUMAN]                                     | 3.17  | 1 | 1  | 1  | 3   |      |      |      |      | 0.29 | 0.97 | 0.38 | 1.89 | 315  | 35.9  | 6.37 |
| P41586 | Pituitary adenylate cyclase-activating polypeptide type I receptor OS=Homo sapiens GN=ADCYAP1R1 PE=1 SV=1 - [PACR_HUMAN] | 2.35  | 1 | 1  | 1  | 1   |      |      |      |      | 0.82 | 0.89 | 0.87 | 0.95 | 468  | 53.3  | 5.78 |
| Q96J94 | Piwi-like protein 1 OS=Homo sapiens GN=PIWIL1 PE=1 SV=1 - [PIWL1_HUMAN]                                                  | 3.25  | 1 | 2  | 2  | 3   |      |      |      |      | 0.74 | 0.76 | 0.65 | 0.66 | 861  | 98.5  | 9.44 |
| Q7Z3Z4 | Piwi-like protein 4 OS=Homo sapiens GN=PIWIL4 PE=2 SV=2 - [PIWL4_HUMAN]                                                  | 2.35  | 1 | 1  | 1  | 1   | 0.93 | 1.01 | 1.11 | 1.22 |      |      |      |      | 852  | 96.5  | 8.88 |
| Q6PK18 | PKHD domain-containing transmembrane protein C17orf101 OS=Homo sapiens GN=C17orf101 PE=2 SV=2 - [CQ101_HUMAN]            | 4.08  | 1 | 1  | 1  | 1   |      |      |      |      | 0.76 | 0.28 | 0.95 | 0.35 | 319  | 35.6  | 8.18 |
| A1L4L8 | PLAC8-like protein 1 OS=Homo sapiens GN=PLAC8L1 PE=2 SV=1 - [PL8L1_HUMAN]                                                | 10.17 | 1 | 1  | 1  | 1   |      |      |      |      |      |      | 0.45 | 0.73 | 177  | 19.9  | 7.71 |
| Q5JTB6 | Placenta-specific protein 9 OS=Homo sapiens GN=PLAC9 PE=2 SV=1 - [PLAC9_HUMAN]                                           | 17.53 | 1 | 1  | 1  | 1   |      |      |      |      | 0.93 | 1.25 | 0.93 | 1.24 | 97   | 10.3  | 4.92 |
| Q13835 | Plakophilin-1 OS=Homo sapiens GN=PKP1 PE=1 SV=2 - [PKP1_HUMAN]                                                           | 4.28  | 1 | 2  | 2  | 4   | 1.05 | 1.07 | 0.89 | 0.91 |      |      |      |      | 747  | 82.8  | 9.13 |
| Q9Y446 | Plakophilin-3 OS=Homo sapiens GN=PKP3 PE=1 SV=1 - [PKP3_HUMAN]                                                           | 5.02  | 1 | 2  | 2  | 2   | 8.87 | 5.31 | 2.23 | 1.34 | 0.91 | 0.95 | 1.10 | 1.16 | 797  | 87.0  | 9.32 |
| Q99569 | Plakophilin-4 OS=Homo sapiens GN=PKP4 PE=1 SV=2 - [PKP4_HUMAN]                                                           | 0.76  | 2 | 1  | 1  | 1   |      |      |      |      | 1.04 | 1.05 | 0.97 | 0.98 | 1192 | 131.8 | 8.94 |
| Q9BTY2 | Plasma alpha-L-fucosidase OS=Homo sapiens GN=FUCA2 PE=1 SV=2 - [FUCO2_HUMAN]                                             | 3.85  | 1 | 2  | 2  | 3   | 1.30 | 1.17 | 1.27 | 1.15 |      |      |      |      | 467  | 54.0  | 6.25 |
| P03952 | Plasma kallikrein OS=Homo sapiens GN=KLKB1 PE=1 SV=1 - [KLKB1_HUMAN]                                                     | 65.36 | 2 | 41 | 41 | 536 | 1.43 | 1.43 | 1.35 | 1.36 | 1.03 | 1.01 | 1.04 | 1.04 | 638  | 71.3  | 8.22 |
| P20020 | Plasma membrane calcium-transporting ATPase 1 OS=Homo sapiens GN=ATP2B1 PE=1 SV=3 - [AT2B1_HUMAN]                        | 5.33  | 3 | 2  | 3  | 5   |      |      |      |      | 1.00 | 1.04 | 0.78 | 0.80 | 1258 | 138.7 | 6.04 |
| Q16720 | Plasma membrane calcium-transporting ATPase 3 OS=Homo sapiens GN=ATP2B3 PE=1 SV=3 - [AT2B3_HUMAN]                        | 2.46  | 1 | 1  | 2  | 3   | 0.88 | 1.07 | 0.92 | 1.11 |      |      |      |      | 1220 | 134.1 | 5.62 |

|        |                                                                                                                       |       |   |    |    |      |      |      |      |      |      |      |      |      |      |       |      |
|--------|-----------------------------------------------------------------------------------------------------------------------|-------|---|----|----|------|------|------|------|------|------|------|------|------|------|-------|------|
| P05155 | Plasma protease C1 inhibitor OS=Homo sapiens<br>GN=SERPING1 PE=1 SV=2 - [IC1_HUMAN]                                   | 49.20 | 1 | 27 | 27 | 1009 | 0.95 | 0.94 | 0.94 | 0.93 | 0.85 | 0.88 | 0.82 | 0.88 | 500  | 55.1  | 6.55 |
| P05154 | Plasma serine protease inhibitor OS=Homo sapiens<br>GN=SERPINA5 PE=1 SV=3 - [PSP_HUMAN]                               | 43.35 | 3 | 16 | 16 | 177  | 0.96 | 1.00 | 0.94 | 0.97 | 0.95 | 1.03 | 0.89 | 0.96 | 406  | 45.6  | 9.26 |
| P05121 | Plasminogen activator inhibitor 1 OS=Homo sapiens<br>GN=SERPINE1 PE=1 SV=1 - [PAI1_HUMAN]                             | 15.92 | 1 | 7  | 7  | 17   | 1.40 | 1.33 | 1.33 | 1.33 | 1.38 | 1.24 | 1.29 | 1.16 | 402  | 45.0  | 7.20 |
| P05120 | Plasminogen activator inhibitor 2 OS=Homo sapiens<br>GN=SERPINB2 PE=1 SV=2 - [PAI2_HUMAN]                             | 10.36 | 1 | 1  | 1  | 1    | 0.88 | 0.78 | 0.77 | 0.69 |      |      |      |      | 415  | 46.6  | 5.63 |
| P00747 | Plasminogen OS=Homo sapiens GN=PLG PE=1 SV=2 -<br>[PLMN_HUMAN]                                                        | 72.47 | 2 | 59 | 65 | 2192 | 1.11 | 1.09 | 1.11 | 1.10 | 0.89 | 0.91 | 0.90 | 0.92 | 810  | 90.5  | 7.24 |
| Q02325 | Plasminogen-related protein B OS=Homo sapiens<br>GN=PLGLB1 PE=1 SV=1 - [PLGB_HUMAN]                                   | 36.46 | 1 | 1  | 6  | 74   |      |      |      |      | 1.28 | 1.30 | 1.33 | 1.35 | 96   | 11.0  | 6.52 |
| P13796 | Plastin-2 OS=Homo sapiens GN=LCP1 PE=1 SV=6 -<br>[PLSL_HUMAN]                                                         | 43.22 | 3 | 22 | 22 | 95   | 0.87 | 0.86 | 0.91 | 0.92 | 1.03 | 1.01 | 1.01 | 0.95 | 627  | 70.2  | 5.43 |
| P02775 | Platelet basic protein OS=Homo sapiens GN=PPBP PE=1<br>SV=3 - [CXCL7_HUMAN]                                           | 53.91 | 1 | 9  | 9  | 395  | 1.26 | 1.35 | 1.15 | 1.24 | 1.24 | 1.06 | 1.22 | 1.06 | 128  | 13.9  | 8.79 |
| Q5VY43 | Platelet endothelial aggregation receptor 1 OS=Homo sapiens<br>GN=PEAR1 PE=1 SV=1 - [PEAR1_HUMAN]                     | 6.17  | 1 | 4  | 4  | 8    | 1.01 | 1.07 | 1.00 | 0.96 |      |      |      |      | 1037 | 110.6 | 6.81 |
| P16284 | Platelet endothelial cell adhesion molecule OS=Homo sapiens<br>GN=PECAM1 PE=1 SV=1 - [PECA1_HUMAN]                    | 1.49  | 1 | 1  | 1  | 3    |      |      |      |      | 0.57 | 0.59 | 1.10 | 0.85 | 738  | 82.5  | 6.99 |
| P02776 | Platelet factor 4 OS=Homo sapiens GN=PF4 PE=1 SV=2 -<br>[PLF4_HUMAN]                                                  | 45.54 | 1 | 1  | 5  | 178  |      |      |      |      | 1.47 | 1.32 | 1.31 | 1.19 | 101  | 10.8  | 8.62 |
| P10720 | Platelet factor 4 variant OS=Homo sapiens GN=PF4V1 PE=1<br>SV=1 - [PF4V_HUMAN]                                        | 58.65 | 1 | 2  | 6  | 196  |      |      |      |      | 1.27 | 1.24 | 1.21 | 1.06 | 104  | 11.5  | 9.10 |
| P07359 | Platelet glycoprotein Ib alpha chain OS=Homo sapiens<br>GN=GP1BA PE=1 SV=1 - [GP1BA_HUMAN]                            | 14.06 | 1 | 9  | 9  | 39   | 1.05 | 1.00 | 1.04 | 1.01 | 1.13 | 1.09 | 1.18 | 1.14 | 626  | 68.9  | 6.68 |
| P13224 | Platelet glycoprotein Ib beta chain OS=Homo sapiens<br>GN=GP1BB PE=1 SV=1 - [GP1BB_HUMAN]                             | 14.56 | 1 | 3  | 3  | 8    | 0.73 | 0.74 | 0.74 | 0.75 | 0.52 | 0.93 | 0.94 | 1.70 | 206  | 21.7  | 9.31 |
| P40197 | Platelet glycoprotein V OS=Homo sapiens GN=GP5 PE=1<br>SV=1 - [GPV_HUMAN]                                             | 44.82 | 1 | 17 | 17 | 83   | 1.22 | 1.19 | 1.20 | 1.18 | 1.24 | 1.16 | 1.28 | 1.25 | 560  | 60.9  | 9.63 |
| Q9HCN6 | Platelet glycoprotein VI OS=Homo sapiens GN=GP6 PE=1<br>SV=4 - [GPVI_HUMAN]                                           | 3.24  | 1 | 1  | 1  | 1    | 1.05 | 1.27 | 0.95 | 1.16 |      |      |      |      | 339  | 36.8  | 9.20 |
| Q99487 | Platelet-activating factor acetylhydrolase 2, cytoplasmic<br>OS=Homo sapiens GN=PFAH2 PE=1 SV=1 -<br>[PFAH2_HUMAN]    | 2.81  | 1 | 1  | 1  | 2    |      |      |      |      | 1.13 | 1.31 | 1.07 | 1.23 | 392  | 44.0  | 6.89 |
| P43034 | Platelet-activating factor acetylhydrolase IB subunit alpha<br>OS=Homo sapiens GN=PFAH1B1 PE=1 SV=2 -<br>[LIS1_HUMAN] | 4.88  | 1 | 1  | 1  | 1    |      |      |      |      | 1.28 | 1.44 | 1.40 | 1.58 | 410  | 46.6  | 7.37 |
| Q13093 | Platelet-activating factor acetylhydrolase OS=Homo sapiens<br>GN=PLA2G7 PE=1 SV=1 - [PAFA_HUMAN]                      | 18.37 | 1 | 6  | 6  | 10   | 1.15 | 1.21 | 1.15 | 1.28 |      |      |      |      | 441  | 50.0  | 7.56 |
| Q9NRA1 | Platelet-derived growth factor C OS=Homo sapiens<br>GN=PDGFC PE=1 SV=2 - [PDGFC_HUMAN]                                | 3.19  | 1 | 1  | 1  | 2    |      |      |      |      | 1.83 | 2.03 | 1.68 | 1.86 | 345  | 39.0  | 6.14 |
| Q9GZP0 | Platelet-derived growth factor D OS=Homo sapiens<br>GN=PDGFD PE=1 SV=1 - [PDGFD_HUMAN]                                | 3.78  | 1 | 1  | 1  | 1    |      |      |      |      | 0.67 | 0.17 | 0.71 | 0.18 | 370  | 42.8  | 7.97 |
| P09619 | Platelet-derived growth factor receptor beta OS=Homo sapiens<br>GN=PDGFRB PE=1 SV=1 - [PGFRB_HUMAN]                   | 0.99  | 1 | 1  | 1  | 3    | 1.37 | 1.33 | 1.37 | 1.33 | 0.65 | 0.82 | 1.04 | 1.32 | 1106 | 123.9 | 4.98 |
| Q15198 | Platelet-derived growth factor receptor-like protein OS=Homo<br>sapiens GN=PDGFRL PE=1 SV=1 - [PGFRL_HUMAN]           | 11.47 | 1 | 2  | 2  | 2    |      |      |      |      | 0.88 | 0.72 | 0.88 | 0.71 | 375  | 41.8  | 8.50 |
| P04085 | Platelet-derived growth factor subunit A OS=Homo sapiens<br>GN=PDGFA PE=1 SV=1 - [PDGFA_HUMAN]                        | 13.74 | 1 | 2  | 2  | 5    |      |      |      |      | 1.87 | 1.82 | 1.89 | 1.84 | 211  | 24.0  | 9.39 |
| P01127 | Platelet-derived growth factor subunit B OS=Homo sapiens<br>GN=PDGFB PE=1 SV=1 - [PDGFB_HUMAN]                        | 2.49  | 1 | 1  | 1  | 1    |      |      |      |      | 1.76 | 1.72 | 1.83 | 1.79 | 241  | 27.3  | 9.16 |
| Q9Y2H5 | Pleckstrin homology domain-containing family A member 6<br>OS=Homo sapiens GN=PLEKHA6 PE=1 SV=4 -<br>[PKHA6_HUMAN]    | 7.63  | 1 | 3  | 3  | 3    | 0.66 | 0.37 |      |      | 1.21 | 1.17 | 1.39 | 1.34 | 1048 | 117.1 | 9.10 |
| Q6IQ23 | Pleckstrin homology domain-containing family A member 7<br>OS=Homo sapiens GN=PLEKHA7 PE=1 SV=2 -<br>[PKHA7_HUMAN]    | 3.93  | 1 | 3  | 3  | 6    | 0.96 | 0.96 | 0.86 | 0.86 | 0.99 | 0.96 | 0.94 | 0.91 | 1121 | 127.1 | 9.35 |

|        |                                                                                                                      |       |   |   |   |    |      |      |      |      |      |      |      |      |      |       |      |
|--------|----------------------------------------------------------------------------------------------------------------------|-------|---|---|---|----|------|------|------|------|------|------|------|------|------|-------|------|
| Q96JA3 | Pleckstrin homology domain-containing family A member 8<br>OS=Homo sapiens GN=PLEKHA8 PE=1 SV=3 -<br>[PKHA8_HUMAN]   | 7.71  | 2 | 2 | 3 | 3  | 0.88 | 0.44 | 0.84 | 0.43 | 0.64 | 1.37 | 0.74 | 1.57 | 519  | 58.2  | 5.11 |
| Q9H7P9 | Pleckstrin homology domain-containing family G member 2<br>OS=Homo sapiens GN=PLEKHG2 PE=1 SV=3 -<br>[PKHG2_HUMAN]   | 2.74  | 1 | 2 | 2 | 2  | 1.46 | 1.33 | 1.32 | 1.22 |      |      |      |      | 1386 | 147.9 | 5.86 |
| Q96PX9 | Pleckstrin homology domain-containing family G member 4B<br>OS=Homo sapiens GN=PLEKHG4B PE=2 SV=4 -<br>[PKH4B_HUMAN] | 2.83  | 1 | 2 | 2 | 3  | 0.67 | 0.65 | 0.63 | 0.61 | 0.54 | 0.73 | 0.70 | 0.95 | 1271 | 139.6 | 6.79 |
| Q3KR16 | Pleckstrin homology domain-containing family G member 6<br>OS=Homo sapiens GN=PLEKHG6 PE=1 SV=3 -<br>[PKHG6_HUMAN]   | 7.22  | 1 | 3 | 3 | 3  |      |      |      |      | 0.70 | 0.77 | 0.70 | 0.79 | 790  | 88.9  | 7.09 |
| Q9ULM0 | Pleckstrin homology domain-containing family H member 1<br>OS=Homo sapiens GN=PLEKHH1 PE=2 SV=2 -<br>[PKHH1_HUMAN]   | 1.10  | 1 | 1 | 1 | 1  | 0.90 | 1.04 | 0.88 | 1.02 |      |      |      |      | 1364 | 151.1 | 7.94 |
| Q8IWE5 | Pleckstrin homology domain-containing family M member 2<br>OS=Homo sapiens GN=PLEKHM2 PE=1 SV=2 -<br>[PKHM2_HUMAN]   | 1.47  | 1 | 1 | 1 | 1  |      |      |      |      | 0.47 | 1.69 | 1.11 | 3.98 | 1019 | 112.7 | 4.93 |
| Q6ZWE6 | Pleckstrin homology domain-containing family M member 3<br>OS=Homo sapiens GN=PLEKHM3 PE=2 SV=2 -<br>[PKHM3_HUMAN]   | 1.71  | 1 | 1 | 1 | 1  | 1.22 | 1.15 | 1.26 | 1.18 |      |      |      |      | 761  | 87.1  | 7.09 |
| Q53GL0 | Pleckstrin homology domain-containing family O member 1<br>OS=Homo sapiens GN=PLEKHO1 PE=1 SV=2 -<br>[PKHO1_HUMAN]   | 4.40  | 1 | 1 | 1 | 2  | 1.11 | 1.07 | 1.25 | 1.22 |      |      |      |      | 409  | 46.2  | 8.82 |
| Q8TD55 | Pleckstrin homology domain-containing family O member 2<br>OS=Homo sapiens GN=PLEKHO2 PE=1 SV=1 -<br>[PKHO2_HUMAN]   | 7.76  | 3 | 1 | 2 | 3  | 0.81 |      | 1.22 |      |      |      |      |      | 490  | 53.3  | 5.43 |
| Q6NSJ2 | Pleckstrin homology-like domain family B member 3<br>OS=Homo sapiens GN=PHLDB3 PE=2 SV=3 -<br>[PHLB3_HUMAN]          | 8.28  | 1 | 2 | 2 | 5  | 1.39 | 1.44 | 1.43 | 1.49 |      |      |      |      | 640  | 71.9  | 6.57 |
| P08567 | Pleckstrin OS=Homo sapiens GN=PLEK PE=1 SV=3 -<br>[PLEK_HUMAN]                                                       | 22.57 | 1 | 6 | 6 | 31 | 0.89 | 0.80 | 1.00 | 0.92 | 0.85 | 0.92 | 0.91 | 1.01 | 350  | 40.1  | 8.28 |
| Q15149 | Plectin OS=Homo sapiens GN=PLEC PE=1 SV=3 -<br>[PLEC_HUMAN]                                                          | 1.17  | 5 | 4 | 5 | 9  | 1.85 | 1.81 | 1.65 | 1.61 | 2.31 | 1.84 | 2.30 | 1.82 | 4684 | 531.5 | 5.96 |
| O43660 | Pleiotropic regulator 1 OS=Homo sapiens GN=PLRG1 PE=1<br>SV=1 - [PLRG1_HUMAN]                                        | 7.98  | 1 | 2 | 2 | 4  | 0.67 | 0.63 | 0.86 | 0.82 |      |      |      |      | 514  | 57.2  | 9.17 |
| Q8IUK5 | Plexin domain-containing protein 1 OS=Homo sapiens<br>GN=PLXDC1 PE=1 SV=2 - [PLDX1_HUMAN]                            | 6.60  | 1 | 2 | 3 | 5  | 0.94 | 0.80 | 0.99 | 0.82 |      |      |      |      | 500  | 55.7  | 5.85 |
| Q6UX71 | Plexin domain-containing protein 2 OS=Homo sapiens<br>GN=PLXDC2 PE=1 SV=1 - [PXDC2_HUMAN]                            | 12.85 | 1 | 6 | 7 | 28 | 1.05 | 1.02 | 0.99 | 1.03 | 1.06 | 1.00 | 1.05 | 1.02 | 529  | 59.5  | 6.46 |
| Q9UIW2 | Plexin-A1 OS=Homo sapiens GN=PLXNA1 PE=1 SV=3 -<br>[PLXA1_HUMAN]                                                     | 1.05  | 1 | 1 | 1 | 1  |      |      |      |      | 2.16 | 1.67 | 2.07 | 1.60 | 1896 | 210.9 | 6.92 |
| O75051 | Plexin-A2 OS=Homo sapiens GN=PLXNA2 PE=1 SV=4 -<br>[PLXA2_HUMAN]                                                     | 1.95  | 1 | 2 | 2 | 2  | 0.92 | 1.07 | 0.90 | 1.05 | 1.15 | 1.28 | 1.08 | 1.20 | 1894 | 211.0 | 6.48 |
| Q9HCM2 | Plexin-A4 OS=Homo sapiens GN=PLXNA4 PE=1 SV=4 -<br>[PLXA4_HUMAN]                                                     | 1.00  | 1 | 1 | 1 | 1  |      |      |      |      | 0.21 | 1.26 | 0.47 | 2.81 | 1894 | 212.3 | 6.86 |
| O43157 | Plexin-B1 OS=Homo sapiens GN=PLXNB1 PE=1 SV=3 -<br>[PLXB1_HUMAN]                                                     | 1.59  | 1 | 3 | 3 | 4  | 0.93 | 0.94 | 0.89 | 0.90 | 1.08 | 0.87 | 1.14 | 0.92 | 2135 | 232.2 | 5.49 |
| O15031 | Plexin-B2 OS=Homo sapiens GN=PLXNB2 PE=1 SV=3 -<br>[PLXB2_HUMAN]                                                     | 2.77  | 1 | 4 | 4 | 5  | 1.59 | 1.26 | 0.95 | 0.77 | 0.97 | 1.00 | 1.46 | 1.28 | 1838 | 205.0 | 6.24 |
| O60486 | Plexin-C1 OS=Homo sapiens GN=PLXNC1 PE=1 SV=1 -<br>[PLXC1_HUMAN]                                                     | 3.25  | 4 | 2 | 3 | 4  | 0.84 | 0.68 | 0.84 | 0.69 | 2.25 | 3.19 | 1.95 | 2.76 | 1568 | 175.6 | 7.61 |
| P54277 | PMS1 protein homolog 1 OS=Homo sapiens GN=PMS1 PE=1<br>SV=1 - [PMS1_HUMAN]                                           | 1.72  | 1 | 1 | 1 | 1  |      |      |      |      | 1.00 | 1.27 | 0.92 | 1.18 | 932  | 105.8 | 6.67 |
| Q86V59 | PNMA-like protein 1 OS=Homo sapiens GN=PNMAL1 PE=2<br>SV=2 - [PNML1_HUMAN]                                           | 7.97  | 1 | 1 | 1 | 1  |      |      |      |      | 2.06 | 1.70 | 1.50 | 1.24 | 439  | 48.1  | 8.97 |
| O00592 | Podocalyxin OS=Homo sapiens GN=PODXL PE=1 SV=2 -<br>[PODXL_HUMAN]                                                    | 5.20  | 1 | 3 | 3 | 7  | 0.74 | 0.67 | 0.70 | 0.68 | 0.95 | 0.90 | 1.03 | 0.98 | 558  | 58.6  | 5.49 |
| P15151 | Poliovirus receptor OS=Homo sapiens GN=PVR PE=1 SV=2 -<br>[PVR_HUMAN]                                                | 13.19 | 1 | 6 | 6 | 43 | 1.41 | 1.30 | 1.37 | 1.33 | 0.94 | 1.03 | 1.05 | 1.17 | 417  | 45.3  | 6.52 |
| Q15223 | Poliovirus receptor-related protein 1 OS=Homo sapiens<br>GN=PVRL1 PE=1 SV=3 - [PVRL1_HUMAN]                          | 2.71  | 1 | 1 | 1 | 5  | 1.23 | 1.17 | 1.22 | 1.18 | 0.61 | 0.52 | 0.75 | 0.63 | 517  | 57.1  | 6.10 |
| Q92692 | Poliovirus receptor-related protein 2 OS=Homo sapiens<br>GN=PVRL2 PE=1 SV=1 - [PVRL2_HUMAN]                          | 0.74  | 1 | 1 | 1 | 1  |      |      |      |      | 0.96 | 1.16 |      |      | 538  | 57.7  | 4.82 |



|        |                                                                                                                                 |       |   |   |    |    |      |      |      |      |      |      |      |      |      |       |       |
|--------|---------------------------------------------------------------------------------------------------------------------------------|-------|---|---|----|----|------|------|------|------|------|------|------|------|------|-------|-------|
| Q8IUC8 | Polypeptide N-acetylgalactosaminyltransferase 13 OS=Homo sapiens GN=GALNT13 PE=2 SV=2 - [GLT13_HUMAN]                           | 5.22  | 1 | 2 | 2  | 4  | 1.17 | 1.30 | 0.88 | 0.99 | 1.26 | 1.18 | 1.26 | 1.23 | 556  | 64.0  | 6.83  |
| Q10471 | Polypeptide N-acetylgalactosaminyltransferase 2 OS=Homo sapiens GN=GALNT2 PE=1 SV=1 - [GALT2_HUMAN]                             | 1.58  | 1 | 1 | 1  | 2  | 1.06 | 1.03 | 1.04 | 1.02 |      |      |      |      | 571  | 64.7  | 8.35  |
| Q14435 | Polypeptide N-acetylgalactosaminyltransferase 3 OS=Homo sapiens GN=GALNT3 PE=2 SV=2 - [GALT3_HUMAN]                             | 3.63  | 1 | 1 | 1  | 1  |      |      |      |      | 0.95 | 1.00 | 0.84 | 0.88 | 633  | 72.6  | 7.99  |
| Q7Z7M9 | Polypeptide N-acetylgalactosaminyltransferase 5 OS=Homo sapiens GN=GALNT5 PE=1 SV=1 - [GALT5_HUMAN]                             | 1.28  | 1 | 1 | 1  | 1  |      |      |      |      | 0.91 | 1.13 | 0.95 | 1.19 | 940  | 106.2 | 9.47  |
| Q8TCS8 | Polyribonucleotide nucleotidyltransferase 1, mitochondrial OS=Homo sapiens GN=PNPT1 PE=1 SV=2 - [PNPT1_HUMAN]                   | 2.43  | 1 | 1 | 1  | 1  | 1.42 | 1.64 | 1.91 | 2.21 |      |      |      |      | 783  | 85.9  | 7.77  |
| Q5K4E3 | Polyserase-2 OS=Homo sapiens GN=PRSS36 PE=1 SV=2 - [POLS2_HUMAN]                                                                | 2.11  | 1 | 1 | 1  | 1  |      |      |      |      | 1.04 | 0.84 | 1.13 | 0.91 | 855  | 91.9  | 5.66  |
| P0CG47 | Polyubiquitin-B OS=Homo sapiens GN=UBB PE=1 SV=1 - [UBB_HUMAN]                                                                  | 77.29 | 4 | 6 | 6  | 18 | 0.99 | 1.12 | 0.87 | 0.98 | 1.08 | 1.08 | 1.08 | 1.11 | 229  | 25.7  | 7.43  |
| Q96KW2 | POM121-like protein 2 OS=Homo sapiens GN=POM121L2 PE=1 SV=1 - [P12L2_HUMAN]                                                     | 1.13  | 1 | 1 | 1  | 2  | 0.81 | 0.81 | 0.89 | 0.91 |      |      |      |      | 971  | 103.0 | 10.10 |
| Q6ICG8 | Postacrosomal sheath WW domain-binding protein OS=Homo sapiens GN=WBP2NL PE=2 SV=1 - [WBP2L_HUMAN]                              | 11.33 | 1 | 1 | 1  | 3  | 0.89 | 0.81 | 0.94 | 0.73 |      |      |      |      | 309  | 31.9  | 7.84  |
| Q8N5I3 | Potassium channel regulatory protein OS=Homo sapiens GN=KCNRG PE=1 SV=1 - [KCNRG_HUMAN]                                         | 3.68  | 1 | 1 | 1  | 1  | 1.39 | 1.29 | 1.37 | 1.28 |      |      |      |      | 272  | 31.0  | 7.40  |
| O95279 | Potassium channel subfamily K member 5 OS=Homo sapiens GN=KCNK5 PE=1 SV=1 - [KCNK5_HUMAN]                                       | 1.40  | 1 | 1 | 1  | 1  |      |      |      |      | 1.34 | 1.22 | 0.76 | 0.69 | 499  | 55.1  | 6.74  |
| Q5JUK3 | Potassium channel subfamily T member 1 OS=Homo sapiens GN=KCNT1 PE=2 SV=2 - [KCNT1_HUMAN]                                       | 3.58  | 1 | 2 | 2  | 8  |      |      |      |      | 1.03 | 1.15 | 0.97 | 1.07 | 1230 | 138.3 | 7.52  |
| A8MYU2 | Potassium channel subfamily U member 1 OS=Homo sapiens GN=KCNU1 PE=2 SV=2 - [KCNU1_HUMAN]                                       | 1.39  | 1 | 1 | 1  | 1  |      |      |      |      | 1.29 | 1.14 | 0.80 | 0.70 | 1149 | 129.5 | 7.83  |
| P22459 | Potassium voltage-gated channel subfamily A member 4 OS=Homo sapiens GN=KCNA4 PE=1 SV=2 - [KCNA4_HUMAN]                         | 0.92  | 1 | 1 | 1  | 1  |      |      |      |      | 0.49 | 0.72 |      |      | 653  | 73.2  | 5.17  |
| Q14721 | Potassium voltage-gated channel subfamily B member 1 OS=Homo sapiens GN=KCNB1 PE=1 SV=2 - [KCNB1_HUMAN]                         | 1.28  | 1 | 1 | 1  | 3  | 0.84 |      | 1.23 |      | 1.04 | 1.37 | 1.11 | 1.46 | 858  | 95.8  | 8.07  |
| Q96PR1 | Potassium voltage-gated channel subfamily C member 2 OS=Homo sapiens GN=KCNC2 PE=1 SV=1 - [KCNC2_HUMAN]                         | 1.41  | 1 | 1 | 1  | 6  | 0.90 | 1.45 | 1.03 | 1.82 |      |      |      |      | 638  | 70.2  | 7.96  |
| Q9UJ90 | Potassium voltage-gated channel subfamily E member 1-like protein OS=Homo sapiens GN=KCNE1L PE=2 SV=1 - [KCE1L_HUMAN]           | 11.97 | 1 | 1 | 1  | 2  | #### | ###  | #### | #### | #### | ###  | ###  | #### | 142  | 15.0  | 6.30  |
| Q9UIX4 | Potassium voltage-gated channel subfamily G member 1 OS=Homo sapiens GN=KCNG1 PE=2 SV=1 - [KCNG1_HUMAN]                         | 2.73  | 1 | 1 | 1  | 5  | 1.16 | 1.22 | 1.11 | 1.22 |      |      |      |      | 513  | 57.9  | 6.29  |
| O95259 | Potassium voltage-gated channel subfamily H member 1 OS=Homo sapiens GN=KCNH1 PE=1 SV=1 - [KCNH1_HUMAN]                         | 0.61  | 1 | 1 | 1  | 2  | 0.03 | 0.05 | 0.16 | 0.22 |      |      |      |      | 989  | 111.4 | 7.58  |
| Q9UQ05 | Potassium voltage-gated channel subfamily H member 4 OS=Homo sapiens GN=KCNH4 PE=2 SV=1 - [KCNH4_HUMAN]                         | 1.87  | 1 | 1 | 1  | 2  | 0.73 | 0.62 | 0.96 | 0.82 |      |      |      |      | 1017 | 111.6 | 8.54  |
| Q9NS40 | Potassium voltage-gated channel subfamily H member 7 OS=Homo sapiens GN=KCNH7 PE=1 SV=2 - [KCNH7_HUMAN]                         | 1.25  | 1 | 1 | 1  | 1  |      |      |      |      | 0.82 | 0.80 | 0.69 | 0.67 | 1196 | 134.9 | 7.65  |
| Q96L42 | Potassium voltage-gated channel subfamily H member 8 OS=Homo sapiens GN=KCNH8 PE=2 SV=2 - [KCNH8_HUMAN]                         | 3.52  | 1 | 1 | 1  | 1  | 0.88 | 1.16 | 0.93 | 1.22 |      |      |      |      | 1107 | 123.7 | 6.92  |
| P20648 | Potassium-transporting ATPase alpha chain 1 OS=Homo sapiens GN=ATP4A PE=2 SV=5 - [ATP4A_HUMAN]                                  | 2.80  | 1 | 2 | 2  | 2  | 0.97 | 0.92 | 0.91 | 0.88 | 1.03 | 1.06 | 0.95 | 0.97 | 1035 | 114.0 | 5.81  |
| O60741 | Potassium/sodium hyperpolarization-activated cyclic nucleotide-gated channel 1 OS=Homo sapiens GN=HCN1 PE=2 SV=3 - [HCN1_HUMAN] | 5.39  | 2 | 1 | 3  | 5  | 1.22 | 0.71 | 1.71 | 0.99 | 1.74 | 2.37 | 1.25 | 1.70 | 890  | 98.7  | 8.40  |
| Q9Y3Q4 | Potassium/sodium hyperpolarization-activated cyclic nucleotide-gated channel 4 OS=Homo sapiens GN=HCN4 PE=1 SV=1 - [HCN4_HUMAN] | 2.08  | 2 | 1 | 2  | 2  |      |      |      |      | 1.09 | 0.82 | 1.36 | 1.02 | 1203 | 129.0 | 8.91  |
| A5A3E0 | POTE ankyrin domain family member F OS=Homo sapiens GN=POTEF PE=1 SV=2 - [POTEF_HUMAN]                                          | 12.84 | 5 | 3 | 11 | 59 | 1.18 | 1.30 | 1.23 | 1.36 | 0.86 | 0.76 | 0.90 | 0.77 | 1075 | 121.4 | 6.20  |
| Q9UKI9 | POU domain, class 2, transcription factor 3 OS=Homo sapiens GN=POU2F3 PE=2 SV=3 - [PO2F3_HUMAN]                                 | 5.28  | 1 | 1 | 1  | 1  | 0.94 | 0.95 | 0.96 | 0.97 |      |      |      |      | 436  | 47.4  | 8.43  |



|        |                                                                                                                    |       |   |    |    |      |      |      |      |      |      |      |      |       |      |       |      |
|--------|--------------------------------------------------------------------------------------------------------------------|-------|---|----|----|------|------|------|------|------|------|------|------|-------|------|-------|------|
| Q01851 | POU domain, class 4, transcription factor 1 OS=Homo sapiens<br>GN=POU4F1 PE=2 SV=4 - [PO4F1_HUMAN]                 | 3.82  | 1 | 1  | 1  | 2    | 1.03 | 0.81 | 1.04 | 0.82 |      | 419  | 42.7 | 9.01  |      |       |      |
| O75626 | PR domain zinc finger protein 1 OS=Homo sapiens<br>GN=PRDM1 PE=1 SV=2 - [PRDM1_HUMAN]                              | 3.27  | 1 | 1  | 3  | 27   |      |      |      |      | 0.52 | 0.69 | 0.56 | 0.74  | 825  | 91.7  | 8.48 |
| Q9NQV6 | PR domain zinc finger protein 10 OS=Homo sapiens<br>GN=PRDM10 PE=1 SV=2 - [PRD10_HUMAN]                            | 1.22  | 1 | 1  | 1  | 1    | 0.97 | 1.12 | 0.99 | 1.16 |      |      | 1147 | 130.0 | 6.74 |       |      |
| P57071 | PR domain zinc finger protein 15 OS=Homo sapiens<br>GN=PRDM15 PE=2 SV=4 - [PRD15_HUMAN]                            | 2.39  | 1 | 2  | 2  | 3    | 0.76 | 0.81 | 0.80 | 0.86 | 0.97 | 0.69 | 1507 | 169.2 | 8.24 |       |      |
| Q13029 | PR domain zinc finger protein 2 OS=Homo sapiens<br>GN=PRDM2 PE=1 SV=3 - [PRDM2_HUMAN]                              | 0.64  | 1 | 1  | 1  | 1    |      |      |      |      | 1.83 | 1.27 | 1.37 | 0.95  | 1718 | 188.8 | 7.31 |
| Q9NQV8 | PR domain zinc finger protein 8 OS=Homo sapiens<br>GN=PRDM8 PE=2 SV=3 - [PRDM8_HUMAN]                              | 5.95  | 1 | 1  | 1  | 2    | 0.85 | 0.82 | 0.72 | 0.70 |      |      | 689  | 71.6  | 7.84 |       |      |
| O60809 | PRAME family member 10 OS=Homo sapiens<br>GN=PRAMEF10 PE=1 SV=3 - [PRA10_HUMAN]                                    | 5.49  | 1 | 1  | 1  | 1    | 1.16 | 1.28 |      |      |      |      | 474  | 55.0  | 8.10 |       |      |
| Q5SWL8 | PRAME family member 19 OS=Homo sapiens<br>GN=PRAMEF19 PE=2 SV=1 - [PRA19_HUMAN]                                    | 4.39  | 2 | 1  | 2  | 10   | 0.99 | 1.06 | 1.09 | 1.17 |      |      | 410  | 47.4  | 7.90 |       |      |
| P40424 | Pre-B-cell leukemia transcription factor 1 OS=Homo sapiens<br>GN=PBX1 PE=1 SV=1 - [PBX1_HUMAN]                     | 3.49  | 2 | 1  | 1  | 1    |      |      |      |      | 1.38 | 1.49 | 1.29 | 1.39  | 430  | 46.6  | 7.03 |
| Q9C0J8 | pre-mRNA 3' end processing protein WDR33 OS=Homo sapiens<br>GN=WDR33 PE=1 SV=2 - [WDR33_HUMAN]                     | 3.67  | 1 | 2  | 2  | 3    |      |      |      |      | 0.20 | 0.27 | 0.23 | 0.30  | 1336 | 145.8 | 9.17 |
| O94913 | Pre-mRNA cleavage complex 2 protein Pcf11 OS=Homo sapiens<br>GN=PCF11 PE=1 SV=3 - [PCF11_HUMAN]                    | 0.84  | 1 | 1  | 1  | 1    | 0.84 | 0.74 | 0.98 | 0.87 |      |      | 1555 | 172.9 | 8.48 |       |      |
| Q9UMS4 | Pre-mRNA-processing factor 19 OS=Homo sapiens<br>GN=PRPF19 PE=1 SV=1 - [PRP19_HUMAN]                               | 1.79  | 1 | 1  | 1  | 6    | 1.43 | 1.42 | 1.38 | 1.40 |      |      | 504  | 55.1  | 6.61 |       |      |
| O75400 | Pre-mRNA-processing factor 40 homolog A OS=Homo sapiens<br>GN=PRPF40A PE=1 SV=2 - [PR40A_HUMAN]                    | 1.78  | 1 | 1  | 1  | 2    | 0.81 | 0.88 | 0.72 | 0.80 |      |      | 957  | 108.7 | 7.56 |       |      |
| O94906 | Pre-mRNA-processing factor 6 OS=Homo sapiens<br>GN=PRPF6 PE=1 SV=1 - [PRP6_HUMAN]                                  | 1.38  | 1 | 1  | 1  | 1    | 1.08 | 0.96 | 0.97 | 0.87 |      |      | 941  | 106.9 | 8.25 |       |      |
| Q6P2Q9 | Pre-mRNA-processing-splicing factor 8 OS=Homo sapiens<br>GN=PRPF8 PE=1 SV=2 - [PRP8_HUMAN]                         | 0.90  | 1 | 1  | 1  | 1    | 0.26 | 0.46 | 0.13 | 0.23 |      |      | 2335 | 273.4 | 8.84 |       |      |
| Q99633 | Pre-mRNA-splicing factor 18 OS=Homo sapiens GN=PRPF18<br>PE=1 SV=1 - [PRP18_HUMAN]                                 | 3.22  | 1 | 1  | 1  | 1    | 1.45 | 1.43 | 1.38 | 1.36 |      |      | 342  | 39.8  | 8.15 |       |      |
| Q92620 | Pre-mRNA-splicing factor ATP-dependent RNA helicase<br>PRP16 OS=Homo sapiens GN=DHX38 PE=1 SV=2 -<br>[PRP16_HUMAN] | 1.30  | 1 | 1  | 1  | 1    | 1.72 | 1.23 | 1.38 | 0.99 |      |      | 1227 | 140.4 | 6.54 |       |      |
| Q9ULR0 | Pre-mRNA-splicing factor ISY1 homolog OS=Homo sapiens<br>GN=ISY1 PE=1 SV=3 - [ISY1_HUMAN]                          | 14.39 | 1 | 2  | 2  | 3    |      |      |      |      | 1.18 | 0.72 | 1.17 | 0.72  | 285  | 33.0  | 5.17 |
| O95391 | Pre-mRNA-splicing factor SLU7 OS=Homo sapiens GN=SLU7<br>PE=1 SV=2 - [SLU7_HUMAN]                                  | 2.22  | 1 | 1  | 1  | 1    | 0.83 | 0.87 | 0.92 | 0.97 |      |      | 586  | 68.3  | 7.14 |       |      |
| O75934 | Pre-mRNA-splicing factor SPF27 OS=Homo sapiens<br>GN=BCAS2 PE=1 SV=1 - [SPF27_HUMAN]                               | 19.56 | 1 | 3  | 3  | 3    |      |      |      |      | 1.08 | 1.11 | 0.96 | 0.99  | 225  | 26.1  | 5.66 |
| P20742 | Pregnancy zone protein OS=Homo sapiens GN=PZP PE=1<br>SV=4 - [PZP_HUMAN]                                           | 45.07 | 2 | 49 | 64 | 4032 | 1.72 | 1.67 | 1.69 | 1.70 | 1.76 | 1.84 | 1.57 | 1.72  | 1482 | 163.8 | 6.38 |
| P11464 | Pregnancy-specific beta-1-glycoprotein 1 OS=Homo sapiens<br>GN=PSG1 PE=2 SV=1 - [PSG1_HUMAN]                       | 34.61 | 1 | 4  | 10 | 131  | 4.65 | 6.41 | 4.65 | 5.82 | 6.56 | 7.05 | 6.48 | 6.95  | 419  | 47.2  | 8.12 |
| Q9UQ72 | Pregnancy-specific beta-1-glycoprotein 11 OS=Homo sapiens<br>GN=PSG11 PE=2 SV=3 - [PSG11_HUMAN]                    | 20.30 | 1 | 2  | 6  | 60   | 6.41 | 8.90 | 6.29 | 8.86 | 6.96 | 6.89 | 6.77 | 6.69  | 335  | 37.1  | 7.14 |
| P11465 | Pregnancy-specific beta-1-glycoprotein 2 OS=Homo sapiens<br>GN=PSG2 PE=2 SV=2 - [PSG2_HUMAN]                       | 23.28 | 1 | 2  | 6  | 72   | 0.95 | 1.00 | 1.07 | 1.14 | #### | ###  | ###  | ####  | 335  | 37.2  | 7.80 |
| Q16557 | Pregnancy-specific beta-1-glycoprotein 3 OS=Homo sapiens<br>GN=PSG3 PE=2 SV=2 - [PSG3_HUMAN]                       | 22.90 | 1 | 2  | 10 | 136  | 4.38 | 5.29 | 5.07 | 6.19 | 1.22 | 0.92 | 0.94 | 0.71  | 428  | 47.9  | 8.54 |
| Q00888 | Pregnancy-specific beta-1-glycoprotein 4 OS=Homo sapiens<br>GN=PSG4 PE=2 SV=3 - [PSG4_HUMAN]                       | 24.34 | 1 | 3  | 8  | 102  | 2.48 | 3.58 | 2.32 | 3.15 | 5.22 | 4.36 | 5.01 | 4.18  | 419  | 47.1  | 9.26 |
| Q15238 | Pregnancy-specific beta-1-glycoprotein 5 OS=Homo sapiens<br>GN=PSG5 PE=1 SV=3 - [PSG5_HUMAN]                       | 23.58 | 1 | 3  | 9  | 69   | 3.44 | 4.41 | 3.46 | 4.28 | 3.25 | 3.21 | 3.15 | 3.11  | 335  | 37.7  | 8.87 |

|        |                                                                                                                              |       |   |    |    |    |      |      |      |      |      |      |      |      |      |       |       |
|--------|------------------------------------------------------------------------------------------------------------------------------|-------|---|----|----|----|------|------|------|------|------|------|------|------|------|-------|-------|
| Q00887 | Pregnancy-specific beta-1-glycoprotein 9 OS=Homo sapiens GN=PSG9 PE=2 SV=2 - [PSG9_HUMAN]                                    | 15.02 | 1 | 2  | 7  | 68 | 2.36 | 2.78 | 2.35 | 2.80 | 3.65 | 3.43 | 3.20 | 3.01 | 426  | 48.2  | 8.07  |
| Q9UHG3 | Prenylcysteine oxidase 1 OS=Homo sapiens GN=PCYOX1 PE=1 SV=3 - [PCYOX_HUMAN]                                                 | 25.74 | 1 | 11 | 11 | 39 | 1.12 | 1.28 | 1.01 | 1.18 | 1.21 | 1.31 | 1.12 | 1.21 | 505  | 56.6  | 6.18  |
| Q8NBM8 | Prenylcysteine oxidase-like OS=Homo sapiens GN=PCYOX1L PE=1 SV=2 - [PCYXL_HUMAN]                                             | 5.67  | 1 | 1  | 1  | 1  | 0.96 | 0.77 | 1.36 | 1.11 |      |      |      |      | 494  | 54.6  | 7.31  |
| Q13519 | Prepronociceptin OS=Homo sapiens GN=PNOC PE=1 SV=1 - [PNOC_HUMAN]                                                            | 5.68  | 1 | 1  | 1  | 1  |      |      |      |      | 1.39 | 2.03 | 1.46 | 2.12 | 176  | 20.3  | 8.40  |
| P49768 | Presenilin-1 OS=Homo sapiens GN=PSEN1 PE=1 SV=1 - [PSN1_HUMAN]                                                               | 3.85  | 1 | 1  | 1  | 1  |      |      |      |      | 1.20 | 1.54 | 1.39 | 1.78 | 467  | 52.6  | 5.31  |
| Q96MT3 | Prickle-like protein 1 OS=Homo sapiens GN=PRICKLE1 PE=1 SV=2 - [PRIC1_HUMAN]                                                 | 2.41  | 1 | 1  | 1  | 1  | 1.24 | 1.70 | 1.15 | 1.57 |      |      |      |      | 831  | 94.2  | 6.24  |
| Q9UKY0 | Prion-like protein doppel OS=Homo sapiens GN=PRND PE=1 SV=2 - [PRND_HUMAN]                                                   | 13.64 | 1 | 1  | 1  | 1  |      |      |      |      | 1.22 | 1.28 | 1.14 | 1.19 | 176  | 20.3  | 9.03  |
| Q9NRD5 | PRKCA-binding protein OS=Homo sapiens GN=PICK1 PE=1 SV=2 - [PICK1_HUMAN]                                                     | 1.69  | 1 | 1  | 1  | 1  |      |      |      |      |      | 0.77 | 0.78 | 415  | 46.6 | 5.30  |       |
| Q9H875 | PRKR-interacting protein 1 OS=Homo sapiens GN=PRKRIP1 PE=1 SV=1 - [PKRI1_HUMAN]                                              | 14.13 | 1 | 1  | 1  | 1  | 0.38 | 0.30 | 0.61 | 0.48 |      |      |      |      | 184  | 21.0  | 9.79  |
| Q14005 | Pro-interleukin-16 OS=Homo sapiens GN=IL16 PE=1 SV=4 - [IL16_HUMAN]                                                          | 0.83  | 1 | 1  | 1  | 1  |      | 0.38 |      | 0.56 |      |      |      |      | 1332 | 141.7 | 8.06  |
| Q02297 | Pro-neuregulin-1, membrane-bound isoform OS=Homo sapiens GN=NRG1 PE=1 SV=3 - [NRG1_HUMAN]                                    | 2.03  | 1 | 1  | 1  | 4  |      |      |      |      | 0.36 | 0.33 | 0.77 | 0.72 | 640  | 70.3  | 8.79  |
| P07602 | Proactivator polypeptide OS=Homo sapiens GN=PSAP PE=1 SV=2 - [SAP_HUMAN]                                                     | 13.55 | 1 | 6  | 6  | 10 | 1.07 | 0.89 | 1.11 | 0.95 | 1.57 | 1.03 | 1.45 | 1.10 | 524  | 58.1  | 5.17  |
| Q96HY7 | Probable 2-oxoglutarate dehydrogenase E1 component DHKTD1, mitochondrial OS=Homo sapiens GN=DHTKD1 PE=2 SV=2 - [DHTK1_HUMAN] | 0.87  | 1 | 1  | 1  | 1  |      |      |      |      | 1.16 | 1.34 | 1.19 | 1.38 | 919  | 103.0 | 6.93  |
| Q8N6M5 | Probable allantoicase OS=Homo sapiens GN=ALLC PE=2 SV=3 - [ALLC_HUMAN]                                                       | 4.15  | 1 | 1  | 1  | 1  | 1.28 | 1.18 | 1.14 | 1.05 |      |      |      |      | 410  | 45.7  | 6.18  |
| Q8NDH3 | Probable aminopeptidase NPEPL1 OS=Homo sapiens GN=NPEPL1 PE=1 SV=3 - [PEPL1_HUMAN]                                           | 3.82  | 1 | 1  | 1  | 2  |      |      |      |      | 1.44 | 1.46 | 1.15 | 1.17 | 523  | 55.8  | 6.87  |
| Q96I59 | Probable asparagine-tRNA ligase, mitochondrial OS=Homo sapiens GN=NARS2 PE=1 SV=3 - [SYNM_HUMAN]                             | 2.94  | 1 | 1  | 1  | 1  | 1.17 | 0.95 | 1.08 | 0.88 |      |      |      |      | 477  | 54.1  | 7.24  |
| Q13206 | Probable ATP-dependent RNA helicase DDX10 OS=Homo sapiens GN=DDX10 PE=1 SV=2 - [DDX10_HUMAN]                                 | 1.03  | 1 | 1  | 1  | 2  |      |      |      |      | 0.48 | 3.77 | 0.38 | 2.99 | 875  | 100.8 | 8.63  |
| Q9UH16 | Probable ATP-dependent RNA helicase DDX20 OS=Homo sapiens GN=DDX20 PE=1 SV=2 - [DDX20_HUMAN]                                 | 2.18  | 1 | 1  | 1  | 1  |      |      |      |      | 0.73 | 0.61 | 1.11 | 0.92 | 824  | 92.2  | 6.95  |
| Q9NUL7 | Probable ATP-dependent RNA helicase DDX28 OS=Homo sapiens GN=DDX28 PE=2 SV=2 - [DDX28_HUMAN]                                 | 4.26  | 1 | 2  | 2  | 2  | 1.11 | 0.86 | 1.16 | 0.90 | 0.99 | 0.57 | 0.76 | 0.44 | 540  | 59.5  | 10.42 |
| Q9H8H2 | Probable ATP-dependent RNA helicase DDX31 OS=Homo sapiens GN=DDX31 PE=1 SV=2 - [DDX31_HUMAN]                                 | 1.76  | 1 | 1  | 1  | 1  | 1.57 | 1.24 | 1.70 | 1.34 |      |      |      |      | 851  | 94.0  | 9.99  |
| Q9NXZ2 | Probable ATP-dependent RNA helicase DDX43 OS=Homo sapiens GN=DDX43 PE=1 SV=2 - [DDX43_HUMAN]                                 | 5.56  | 1 | 2  | 2  | 2  |      |      |      |      | 0.73 | 0.78 | 0.69 | 0.74 | 648  | 72.8  | 8.75  |
| Q7L014 | Probable ATP-dependent RNA helicase DDX46 OS=Homo sapiens GN=DDX46 PE=1 SV=2 - [DDX46_HUMAN]                                 | 0.97  | 1 | 1  | 1  | 2  |      |      |      |      | 1.04 | 0.97 | 0.90 | 0.84 | 1031 | 117.3 | 9.29  |
| Q9Y6V7 | Probable ATP-dependent RNA helicase DDX49 OS=Homo sapiens GN=DDX49 PE=1 SV=1 - [DDX49_HUMAN]                                 | 3.31  | 1 | 1  | 1  | 5  |      |      |      |      | 0.71 | 0.15 | 0.75 | 0.16 | 483  | 54.2  | 9.06  |
| Q86TM3 | Probable ATP-dependent RNA helicase DDX53 OS=Homo sapiens GN=DDX53 PE=1 SV=3 - [DDX53_HUMAN]                                 | 5.86  | 1 | 2  | 2  | 3  | 0.84 | 1.07 | 0.77 | 0.98 |      |      |      |      | 631  | 71.1  | 9.07  |
| Q8IY21 | Probable ATP-dependent RNA helicase DDX60 OS=Homo sapiens GN=DDX60 PE=2 SV=3 - [DDX60_HUMAN]                                 | 3.62  | 1 | 4  | 4  | 7  | 0.95 | 0.95 | 0.96 | 0.96 | 1.11 | 1.07 | 1.60 | 1.55 | 1712 | 197.7 | 7.59  |
| Q9H2U1 | Probable ATP-dependent RNA helicase DHX36 OS=Homo sapiens GN=DHX36 PE=1 SV=2 - [DHX36_HUMAN]                                 | 2.38  | 1 | 1  | 2  | 2  | 0.85 | 0.89 | 0.91 | 0.95 |      |      |      |      | 1008 | 114.7 | 7.68  |
| Q8IY37 | Probable ATP-dependent RNA helicase DHX37 OS=Homo sapiens GN=DHX37 PE=1 SV=1 - [DHX37_HUMAN]                                 | 2.51  | 1 | 2  | 2  | 7  | 0.77 | 0.97 | 0.74 | 0.82 | 1.00 |      | 0.94 |      | 1157 | 129.5 | 8.10  |

|        |                                                                                                   |      |   |   |   |    |      |      |      |      |      |      |      |      |      |       |      |
|--------|---------------------------------------------------------------------------------------------------|------|---|---|---|----|------|------|------|------|------|------|------|------|------|-------|------|
| Q9H6S0 | Probable ATP-dependent RNA helicase YTHDC2 OS=Homo sapiens GN=YTHDC2 PE=1 SV=2 - [YTDC2_HUMAN]    | 1.47 | 2 | 1 | 2 | 14 | 1.10 | 1.00 | 1.09 | 1.00 | 0.47 | 0.53 | 0.45 | 0.50 | 1430 | 160.1 | 8.40 |
| Q9NQ11 | Probable cation-transporting ATPase 13A2 OS=Homo sapiens GN=ATP13A2 PE=1 SV=2 - [AT132_HUMAN]     | 2.63 | 1 | 2 | 2 | 2  | 0.90 | 0.78 | 1.38 | 1.21 |      |      |      |      | 1180 | 128.7 | 8.12 |
| Q9H7F0 | Probable cation-transporting ATPase 13A3 OS=Homo sapiens GN=ATP13A3 PE=1 SV=4 - [AT133_HUMAN]     | 2.20 | 1 | 2 | 2 | 2  | 1.06 | 1.23 | 0.93 | 1.08 | 0.89 | 0.75 | 0.94 | 0.78 | 1226 | 138.0 | 6.64 |
| Q4VNC1 | Probable cation-transporting ATPase 13A4 OS=Homo sapiens GN=ATP13A4 PE=2 SV=3 - [AT134_HUMAN]     | 2.01 | 1 | 1 | 1 | 4  | 0.82 |      | 1.25 |      |      |      |      |      | 1196 | 133.9 | 6.70 |
| Q4VNC0 | Probable cation-transporting ATPase 13A5 OS=Homo sapiens GN=ATP13A5 PE=2 SV=1 - [AT135_HUMAN]     | 1.64 | 1 | 1 | 1 | 5  | 0.84 | 1.27 | 0.85 | 1.28 | 1.06 |      | 1.18 |      | 1218 | 137.2 | 7.90 |
| Q15751 | Probable E3 ubiquitin-protein ligase HERC1 OS=Homo sapiens GN=HERC1 PE=1 SV=2 - [HERC1_HUMAN]     | 0.37 | 1 | 1 | 2 | 48 | 0.98 | 0.95 | 0.95 | 0.93 |      |      |      |      | 4861 | 531.9 | 6.04 |
| Q5GLZ8 | Probable E3 ubiquitin-protein ligase HERC4 OS=Homo sapiens GN=HERC4 PE=1 SV=1 - [HERC4_HUMAN]     | 1.32 | 1 | 1 | 1 | 2  | 1.07 | 1.20 | 0.71 | 0.80 |      |      |      |      | 1057 | 118.5 | 6.19 |
| Q8IVU3 | Probable E3 ubiquitin-protein ligase HERC6 OS=Homo sapiens GN=HERC6 PE=2 SV=2 - [HERC6_HUMAN]     | 1.17 | 1 | 1 | 1 | 1  |      |      |      |      | 0.80 | 0.80 | 0.76 | 0.76 | 1022 | 115.1 | 7.96 |
| Q8NA82 | Probable E3 ubiquitin-protein ligase MARCH10 OS=Homo sapiens GN=MARCH10 PE=1 SV=3 - [MARHA_HUMAN] | 1.49 | 1 | 1 | 1 | 1  |      |      |      |      | 0.94 | 0.95 | 0.88 | 0.88 | 808  | 90.5  | 6.71 |
| O75592 | Probable E3 ubiquitin-protein ligase MYCBP2 OS=Homo sapiens GN=MYCBP2 PE=1 SV=3 - [MYCB2_HUMAN]   | 1.85 | 1 | 3 | 3 | 5  | 0.89 | 0.98 | 0.87 | 0.96 | 0.74 | 0.80 | 0.77 | 0.83 | 4640 | 509.8 | 7.03 |
| P50876 | Probable E3 ubiquitin-protein ligase RNF144A OS=Homo sapiens GN=RNF144A PE=1 SV=2 - [R144A_HUMAN] | 3.77 | 1 | 1 | 1 | 1  |      |      |      |      | 0.78 | 0.95 | 1.03 | 1.26 | 292  | 32.9  | 6.28 |
| Q9NX53 | Probable exonuclease mut-7 homolog, isoform 5 OS=Homo sapiens GN=EXD3 PE=1 SV=2 - [MUT7B_HUMAN]   | 7.54 | 1 | 1 | 1 | 1  | 1.12 | 1.05 | 0.97 | 0.91 |      |      |      |      | 252  | 26.3  | 9.47 |
| Q5T601 | Probable G-protein coupled receptor 110 OS=Homo sapiens GN=GPR110 PE=2 SV=2 - [GP110_HUMAN]       | 3.30 | 1 | 2 | 2 | 2  | 0.73 | 0.72 | 0.71 | 0.71 |      | 0.55 |      |      | 910  | 101.3 | 8.62 |
| Q8IZF7 | Probable G-protein coupled receptor 111 OS=Homo sapiens GN=GPR111 PE=2 SV=1 - [GP111_HUMAN]       | 2.12 | 1 | 1 | 1 | 1  | 1.02 | 0.95 | 0.92 | 0.86 |      |      |      |      | 708  | 78.5  | 8.10 |
| Q8IZF3 | Probable G-protein coupled receptor 115 OS=Homo sapiens GN=GPR115 PE=2 SV=3 - [GP115_HUMAN]       | 2.01 | 1 | 1 | 1 | 1  |      |      |      |      | 0.58 | 1.01 | 0.62 | 1.06 | 695  | 77.7  | 9.01 |
| Q8IZF2 | Probable G-protein coupled receptor 116 OS=Homo sapiens GN=GPR116 PE=1 SV=3 - [GP116_HUMAN]       | 4.16 | 1 | 4 | 4 | 9  | 1.02 | 0.95 | 1.02 | 0.93 | 1.01 | 1.18 | 1.01 | 1.18 | 1346 | 149.4 | 6.65 |
| Q8IWK6 | Probable G-protein coupled receptor 125 OS=Homo sapiens GN=GPR125 PE=1 SV=2 - [GP125_HUMAN]       | 1.29 | 1 | 2 | 2 | 2  | 1.52 | 2.46 | 0.61 | 0.99 | 0.93 | 1.05 | 1.10 | 1.25 | 1321 | 146.1 | 8.48 |
| Q6QNK2 | Probable G-protein coupled receptor 133 OS=Homo sapiens GN=GPR133 PE=2 SV=1 - [GP133_HUMAN]       | 1.37 | 1 | 1 | 1 | 1  | 0.99 | 0.95 | 1.04 | 1.01 |      |      |      |      | 874  | 96.5  | 7.88 |
| Q7Z7M1 | Probable G-protein coupled receptor 144 OS=Homo sapiens GN=GPR144 PE=2 SV=1 - [GP144_HUMAN]       | 3.32 | 1 | 1 | 1 | 3  |      |      |      |      | 0.88 | 0.93 | 0.67 | 0.85 | 963  | 104.0 | 8.02 |
| Q8NFN8 | Probable G-protein coupled receptor 156 OS=Homo sapiens GN=GPR156 PE=2 SV=2 - [GP156_HUMAN]       | 1.97 | 1 | 1 | 1 | 1  | 1.85 | 3.03 | 1.47 | 2.40 |      |      |      |      | 814  | 89.0  | 7.64 |
| Q5T848 | Probable G-protein coupled receptor 158 OS=Homo sapiens GN=GPR158 PE=1 SV=1 - [GP158_HUMAN]       | 0.82 | 1 | 1 | 1 | 2  |      |      |      |      | 1.42 | 1.19 | 1.07 | 0.90 | 1215 | 135.4 | 8.28 |
| Q9UJ42 | Probable G-protein coupled receptor 160 OS=Homo sapiens GN=GPR160 PE=2 SV=1 - [GP160_HUMAN]       | 4.73 | 2 | 2 | 2 | 5  | 0.94 | 0.99 | 0.98 | 1.03 | 2.03 | 2.68 | 1.83 | 2.41 | 338  | 39.8  | 8.51 |
| Q9NS66 | Probable G-protein coupled receptor 173 OS=Homo sapiens GN=GPR173 PE=2 SV=1 - [GP173_HUMAN]       | 1.88 | 1 | 1 | 1 | 7  | 0.97 | 1.08 | 0.99 | 1.11 |      |      |      |      | 373  | 41.5  | 9.16 |
| Q14439 | Probable G-protein coupled receptor 176 OS=Homo sapiens GN=GPR176 PE=2 SV=1 - [GP176_HUMAN]       | 7.96 | 1 | 1 | 1 | 1  |      |      |      |      | 0.99 | 1.20 | 0.58 | 0.71 | 515  | 57.0  | 8.51 |
| Q6PRD1 | Probable G-protein coupled receptor 179 OS=Homo sapiens GN=GPR179 PE=2 SV=2 - [GP179_HUMAN]       | 0.46 | 1 | 1 | 1 | 2  | 0.73 | 0.94 | 0.70 | 0.92 |      |      |      |      | 2367 | 257.2 | 5.71 |
| Q15760 | Probable G-protein coupled receptor 19 OS=Homo sapiens GN=GPR19 PE=2 SV=2 - [GPR19_HUMAN]         | 3.37 | 1 | 1 | 1 | 1  |      |      |      |      | 0.64 | 0.09 | 1.03 | 0.15 | 415  | 47.7  | 9.55 |
| Q99679 | Probable G-protein coupled receptor 21 OS=Homo sapiens GN=GPR21 PE=2 SV=1 - [GPR21_HUMAN]         | 7.16 | 1 | 1 | 1 | 1  |      |      |      |      | 0.72 |      |      |      | 349  | 39.5  | 7.71 |

|        |                                                                                                                      |       |   |   |   |    |      |      |      |      |      |      |      |      |      |      |       |       |
|--------|----------------------------------------------------------------------------------------------------------------------|-------|---|---|---|----|------|------|------|------|------|------|------|------|------|------|-------|-------|
| Q9UPC5 | Probable G-protein coupled receptor 34 OS=Homo sapiens GN=GPR34 PE=1 SV=2 - [GPR34_HUMAN]                            | 2.10  | 1 | 1 | 1 | 3  |      |      |      |      |      | 2.25 | 1.80 | 1.82 | 1.75 | 381  | 43.8  | 9.86  |
| O15354 | Probable G-protein coupled receptor 37 OS=Homo sapiens GN=GPR37 PE=1 SV=2 - [GPR37_HUMAN]                            | 1.96  | 1 | 1 | 1 | 1  |      |      |      |      |      | 0.88 | 1.02 | 0.96 | 1.10 | 613  | 67.1  | 8.27  |
| Q9Y5Y3 | Probable G-protein coupled receptor 45 OS=Homo sapiens GN=GPR45 PE=2 SV=2 - [GPR45_HUMAN]                            | 4.30  | 1 | 1 | 1 | 1  |      |      |      |      |      | 0.54 | 0.18 | 0.78 | 0.26 | 372  | 41.9  | 9.25  |
| Q9BZJ6 | Probable G-protein coupled receptor 63 OS=Homo sapiens GN=GPR63 PE=2 SV=2 - [GPR63_HUMAN]                            | 3.58  | 1 | 1 | 1 | 1  | 1.28 | 0.83 | 1.60 | 1.04 |      |      |      |      |      | 419  | 47.5  | 9.52  |
| P51531 | Probable global transcription activator SNF2L2 OS=Homo sapiens GN=SMARCA2 PE=1 SV=2 - [SMCA2_HUMAN]                  | 1.76  | 1 | 2 | 2 | 2  | 1.07 | 1.03 | 1.22 | 1.17 | 0.93 | 0.86 | 0.94 | 0.87 |      | 1590 | 181.2 | 7.20  |
| Q86YR7 | Probable guanine nucleotide exchange factor MCF2L2 OS=Homo sapiens GN=MCF2L2 PE=2 SV=3 - [MF2L2_HUMAN]               | 1.80  | 1 | 1 | 1 | 2  | 1.23 | 1.78 | 1.14 | 1.65 |      |      |      |      |      | 1114 | 126.9 | 6.42  |
| P42694 | Probable helicase with zinc finger domain OS=Homo sapiens GN=HELZ PE=1 SV=2 - [HELZ_HUMAN]                           | 1.03  | 1 | 1 | 1 | 55 | 0.77 | 0.94 | 0.81 | 0.93 | 1.04 | 1.11 | 1.01 | 1.01 |      | 1942 | 218.8 | 7.42  |
| Q15652 | Probable JmjC domain-containing histone demethylation protein 2C OS=Homo sapiens GN=JMJD1C PE=1 SV=2 - [JHD2C_HUMAN] | 1.42  | 1 | 3 | 3 | 4  | 0.55 | 0.54 | 0.62 | 0.65 |      |      |      |      |      | 2540 | 284.3 | 7.87  |
| Q5TEU4 | Probable methyltransferase C20orf7, mitochondrial OS=Homo sapiens GN=C20orf7 PE=1 SV=1 - [CT007_HUMAN]               | 5.80  | 1 | 2 | 2 | 2  | 1.14 | 1.19 | 1.09 | 1.15 | 1.02 | 0.89 | 1.12 | 0.98 |      | 345  | 38.9  | 6.57  |
| Q13395 | Probable methyltransferase TARBP1 OS=Homo sapiens GN=TARBP1 PE=1 SV=1 - [TARB1_HUMAN]                                | 1.91  | 1 | 1 | 1 | 1  | 0.89 | 1.20 | 0.64 | 0.86 |      |      |      |      |      | 1621 | 181.6 | 7.05  |
| Q969W1 | Probable palmitoyltransferase ZDHHC16 OS=Homo sapiens GN=ZDHHC16 PE=2 SV=1 - [ZDH16_HUMAN]                           | 2.12  | 1 | 1 | 1 | 1  |      |      |      |      |      | 0.56 | 0.67 | 0.69 | 0.82 | 377  | 43.6  | 9.63  |
| Q9ULC8 | Probable palmitoyltransferase ZDHHC8 OS=Homo sapiens GN=ZDHHC8 PE=1 SV=3 - [ZDHC8_HUMAN]                             | 4.44  | 1 | 1 | 1 | 1  | 1.09 | 1.19 | 1.42 | 1.55 |      |      |      |      |      | 765  | 81.4  | 9.17  |
| Q86Y79 | Probable peptidyl-tRNA hydrolase OS=Homo sapiens GN=PTRH1 PE=1 SV=1 - [PTH_HUMAN]                                    | 3.74  | 1 | 1 | 1 | 1  | 0.90 | 0.89 | 0.98 | 0.97 |      |      |      |      |      | 214  | 22.9  | 10.56 |
| Q9NT12 | Probable phospholipid-transporting ATPase IB OS=Homo sapiens GN=ATP8A2 PE=2 SV=2 - [AT8A2_HUMAN]                     | 1.05  | 1 | 1 | 1 | 1  | 1.11 | 1.10 | 1.02 | 1.02 |      |      |      |      |      | 1148 | 129.2 | 7.78  |
| Q9Y2G3 | Probable phospholipid-transporting ATPase IF OS=Homo sapiens GN=ATP11B PE=1 SV=2 - [AT11B_HUMAN]                     | 1.44  | 1 | 1 | 1 | 1  | 0.73 | 1.01 | 0.67 | 0.92 |      |      |      |      |      | 1177 | 134.1 | 6.96  |
| Q8NB49 | Probable phospholipid-transporting ATPase IG OS=Homo sapiens GN=ATP11C PE=1 SV=3 - [AT11C_HUMAN]                     | 1.15  | 1 | 1 | 1 | 14 | 0.85 | 0.83 | 0.87 | 0.86 | 0.94 | 0.94 | 0.88 | 0.92 |      | 1132 | 129.4 | 6.67  |
| O43861 | Probable phospholipid-transporting ATPase IIB OS=Homo sapiens GN=ATP9B PE=2 SV=4 - [ATP9B_HUMAN]                     | 5.06  | 1 | 4 | 4 | 7  | 0.83 | 0.58 | 1.94 | 3.58 | 2.92 | 2.70 |      |      |      | 1147 | 129.2 | 7.61  |
| O60423 | Probable phospholipid-transporting ATPase IK OS=Homo sapiens GN=ATP8B3 PE=2 SV=4 - [AT8B3_HUMAN]                     | 1.92  | 1 | 2 | 2 | 2  | 1.00 | 0.92 | 1.02 | 1.07 | 0.89 | 0.93 |      |      |      | 1300 | 146.7 | 7.90  |
| Q8TF62 | Probable phospholipid-transporting ATPase IM OS=Homo sapiens GN=ATP8B4 PE=2 SV=3 - [AT8B4_HUMAN]                     | 1.51  | 1 | 1 | 1 | 27 | 0.96 | 1.17 | 1.10 | 1.10 |      |      |      |      |      | 1192 | 135.8 | 6.99  |
| O60312 | Probable phospholipid-transporting ATPase VA OS=Homo sapiens GN=ATP10A PE=2 SV=2 - [AT10A_HUMAN]                     | 0.47  | 1 | 1 | 1 | 1  | 0.86 | 0.94 | 0.78 | 0.87 |      |      |      |      |      | 1499 | 167.6 | 8.37  |
| O94823 | Probable phospholipid-transporting ATPase VB OS=Homo sapiens GN=ATP10B PE=2 SV=2 - [AT10B_HUMAN]                     | 0.89  | 1 | 1 | 1 | 1  |      |      |      |      |      | 0.79 | 0.80 | 0.85 | 0.86 | 1461 | 165.3 | 6.89  |
| Q9P241 | Probable phospholipid-transporting ATPase VD OS=Homo sapiens GN=ATP10D PE=2 SV=3 - [AT10D_HUMAN]                     | 4.14  | 1 | 2 | 2 | 2  | 1.43 | 1.14 | 1.46 | 1.17 |      |      |      |      |      | 1426 | 160.2 | 7.15  |
| Q9NY28 | Probable polypeptide N-acetylgalactosaminyltransferase 8 OS=Homo sapiens GN=GALNT8 PE=2 SV=1 - [GALT8_HUMAN]         | 5.34  | 1 | 1 | 1 | 1  |      |      |      |      |      | 0.76 | 0.54 | 0.66 | 0.47 | 637  | 72.8  | 8.87  |
| Q7L3T8 | Probable proline-tRNA ligase, mitochondrial OS=Homo sapiens GN=PARS2 PE=1 SV=1 - [SYPM_HUMAN]                        | 5.47  | 1 | 2 | 2 | 2  |      |      |      |      | 1.22 | 1.35 | 1.15 | 1.29 |      | 475  | 53.2  | 8.10  |
| Q5HYM0 | Probable ribonuclease ZC3H12B OS=Homo sapiens GN=ZC3H12B PE=2 SV=2 - [ZC12B_HUMAN]                                   | 1.94  | 1 | 1 | 1 | 1  |      |      |      |      |      | 0.19 | 0.26 | 0.66 | 0.92 | 825  | 93.0  | 7.80  |
| A2A288 | Probable ribonuclease ZC3H12D OS=Homo sapiens GN=ZC3H12D PE=2 SV=3 - [ZC12D_HUMAN]                                   | 2.09  | 1 | 1 | 1 | 1  |      |      |      |      |      | 0.69 | 0.58 | 0.69 | 0.58 | 527  | 58.0  | 8.68  |
| Q96H35 | Probable RNA-binding protein 18 OS=Homo sapiens GN=RBM18 PE=2 SV=1 - [RBM18_HUMAN]                                   | 10.53 | 1 | 1 | 1 | 1  | 1.10 | 1.00 | 1.11 | 1.02 |      |      |      |      |      | 190  | 21.6  | 9.44  |

|        |                                                                                                                    |       |   |    |    |     |      |      |      |      |      |      |       |      |      |       |      |
|--------|--------------------------------------------------------------------------------------------------------------------|-------|---|----|----|-----|------|------|------|------|------|------|-------|------|------|-------|------|
| Q9Y4C8 | Probable RNA-binding protein 19 OS=Homo sapiens<br>GN=RBM19 PE=1 SV=3 - [RBM19_HUMAN]                              | 2.50  | 1 | 2  | 2  | 2   | 0.85 | 1.07 | 0.94 | 1.24 |      | 960  | 107.3 | 6.54 |      |       |      |
| Q8IYL2 | Probable tRNA (uracil-O(2)-)-methyltransferase OS=Homo sapiens<br>GN=METTL19 PE=2 SV=2 - [TRM44_HUMAN]             | 1.72  | 1 | 1  | 1  | 1   |      |      |      |      | 0.99 | 1.52 | 0.75  | 1.16 | 757  | 84.6  | 7.27 |
| Q10571 | Probable tumor suppressor protein MN1 OS=Homo sapiens<br>GN=MN1 PE=1 SV=3 - [MN1_HUMAN]                            | 1.36  | 1 | 1  | 1  | 1   |      |      |      |      | 0.99 | 0.89 | 1.01  | 0.92 | 1320 | 135.9 | 6.71 |
| Q15113 | Procollagen C-endopeptidase enhancer 1 OS=Homo sapiens<br>GN=PCOLCE PE=1 SV=2 - [PCOC1_HUMAN]                      | 18.26 | 1 | 5  | 5  | 21  | 1.00 | 1.04 | 1.01 | 1.03 | 0.71 | 0.81 | 0.72  | 0.80 | 449  | 47.9  | 7.43 |
| Q9UKZ9 | Procollagen C-endopeptidase enhancer 2 OS=Homo sapiens<br>GN=PCOLCE2 PE=1 SV=1 - [PCOC2_HUMAN]                     | 2.89  | 1 | 1  | 1  | 1   | 0.58 | 0.51 | 0.66 | 0.58 |      |      |       |      | 415  | 45.7  | 8.47 |
| Q8NBJ5 | Procollagen galactosyltransferase 1 OS=Homo sapiens<br>GN=GLT25D1 PE=1 SV=1 - [GT251_HUMAN]                        | 4.82  | 1 | 1  | 1  | 3   | 0.51 | 0.57 | 0.91 | 1.01 |      |      |       |      | 622  | 71.6  | 7.31 |
| Q8IYK4 | Procollagen galactosyltransferase 2 OS=Homo sapiens<br>GN=GLT25D2 PE=1 SV=1 - [GT252_HUMAN]                        | 6.39  | 1 | 2  | 2  | 3   | 3.32 | 4.16 | 3.49 | 4.35 |      |      |       |      | 626  | 72.9  | 6.20 |
| Q02809 | Procollagen-lysine,2-oxoglutarate 5-dioxygenase 1 OS=Homo sapiens<br>GN=PLOD1 PE=1 SV=2 - [PLOD1_HUMAN]            | 3.30  | 1 | 2  | 2  | 5   | 1.10 | 1.11 | 1.14 | 1.16 | 0.62 | 0.14 | 0.66  | 0.14 | 727  | 83.5  | 6.95 |
| O00469 | Procollagen-lysine,2-oxoglutarate 5-dioxygenase 2 OS=Homo sapiens<br>GN=PLOD2 PE=1 SV=2 - [PLOD2_HUMAN]            | 3.93  | 1 | 2  | 2  | 2   |      |      |      |      | 0.47 | 0.73 | 0.77  | 1.20 | 737  | 84.6  | 6.71 |
| P07737 | Profilin-1 OS=Homo sapiens GN=PFN1 PE=1 SV=2 - [PROF1_HUMAN]                                                       | 70.71 | 1 | 9  | 9  | 133 | 0.89 | 0.91 | 0.88 | 0.92 | 0.98 | 0.95 | 0.94  | 0.93 | 140  | 15.0  | 8.27 |
| Q9NZQ7 | Programmed cell death 1 ligand 1 OS=Homo sapiens<br>GN=CD274 PE=1 SV=1 - [PD1L1_HUMAN]                             | 3.45  | 1 | 1  | 1  | 1   |      |      |      |      | 0.98 | 0.23 | 0.71  | 0.16 | 290  | 33.3  | 7.23 |
| Q9BUL8 | Programmed cell death protein 10 OS=Homo sapiens<br>GN=PDCD10 PE=1 SV=1 - [PDC10_HUMAN]                            | 6.13  | 1 | 1  | 1  | 3   | 1.21 | 1.11 | 1.04 | 0.74 |      |      |       |      | 212  | 24.7  | 8.19 |
| O75340 | Programmed cell death protein 6 OS=Homo sapiens<br>GN=PDCD6 PE=1 SV=1 - [PDCD6_HUMAN]                              | 3.14  | 1 | 1  | 1  | 1   | 1.15 | 1.26 | 1.16 | 1.28 |      |      |       |      | 191  | 21.9  | 5.40 |
| P35232 | Prohibitin OS=Homo sapiens GN=PHB PE=1 SV=1 - [PHB_HUMAN]                                                          | 4.41  | 1 | 1  | 1  | 1   | 0.85 | 0.98 | 0.78 | 0.90 |      |      |       |      | 272  | 29.8  | 5.76 |
| P01236 | Prolactin OS=Homo sapiens GN=PRL PE=1 SV=1 - [PRL_HUMAN]                                                           | 5.73  | 1 | 1  | 1  | 1   | 1.45 | 1.33 | 1.02 | 0.95 |      |      |       |      | 227  | 25.9  | 6.98 |
| Q9UQ80 | Proliferation-associated protein 2G4 OS=Homo sapiens<br>GN=PA2G4 PE=1 SV=3 - [PA2G4_HUMAN]                         | 11.17 | 1 | 2  | 2  | 2   | 0.92 | 1.54 | 7.83 | #### |      |      |       |      | 394  | 43.8  | 6.55 |
| O43272 | Proline dehydrogenase 1, mitochondrial OS=Homo sapiens<br>GN=PRODH PE=1 SV=3 - [PROD_HUMAN]                        | 5.33  | 1 | 2  | 2  | 2   | 1.35 | 1.22 | 1.56 | 1.42 | 0.17 | 0.12 | 0.44  | 0.31 | 600  | 68.0  | 7.87 |
| Q8IZL8 | Proline-, glutamic acid- and leucine-rich protein 1 OS=Homo sapiens<br>GN=PELP1 PE=1 SV=2 - [PELP1_HUMAN]          | 1.24  | 1 | 1  | 1  | 2   | 1.12 | 1.17 | 0.92 | 0.96 |      |      |       |      | 1130 | 119.6 | 4.34 |
| Q96NZ9 | Proline-rich acidic protein 1 OS=Homo sapiens GN=PRAP1<br>PE=2 SV=2 - [PRAP1_HUMAN]                                | 28.48 | 1 | 3  | 3  | 9   |      |      |      |      | 1.27 | 1.21 | 1.18  | 1.09 | 151  | 17.2  | 5.36 |
| Q9ULL5 | Proline-rich protein 12 OS=Homo sapiens GN=PRR12 PE=1<br>SV=2 - [PRR12_HUMAN]                                      | 1.65  | 1 | 1  | 1  | 1   |      |      |      |      | 0.90 | 1.36 | 1.24  | 1.88 | 1215 | 129.9 | 8.00 |
| Q16378 | Proline-rich protein 4 OS=Homo sapiens GN=PRR4 PE=1<br>SV=3 - [PROL4_HUMAN]                                        | 11.19 | 1 | 1  | 1  | 1   | 0.63 | 0.72 | 0.64 | 0.74 |      |      |       |      | 134  | 15.1  | 7.06 |
| P85299 | Proline-rich protein 5 OS=Homo sapiens GN=PRR5 PE=1<br>SV=1 - [PRR5_HUMAN]                                         | 4.38  | 1 | 1  | 1  | 1   |      |      |      |      | 0.46 | 0.78 | 0.76  | 1.27 | 388  | 42.7  | 8.18 |
| Q92733 | Proline-rich protein PRCC OS=Homo sapiens GN=PRCC<br>PE=1 SV=1 - [PRCC_HUMAN]                                      | 4.07  | 1 | 1  | 1  | 1   | 1.01 | 0.98 | 1.03 | 1.00 |      |      |       |      | 491  | 52.4  | 5.10 |
| Q7Z6L0 | Proline-rich transmembrane protein 2 OS=Homo sapiens<br>GN=PRRT2 PE=1 SV=1 - [PRRT2_HUMAN]                         | 3.82  | 1 | 1  | 1  | 1   | 0.63 | 0.66 | 0.62 | 0.64 |      |      |       |      | 340  | 34.9  | 4.70 |
| Q5FWE3 | Proline-rich transmembrane protein 3 OS=Homo sapiens<br>GN=PRRT3 PE=1 SV=3 - [PRRT3_HUMAN]                         | 3.77  | 1 | 2  | 2  | 5   | 0.85 | 0.94 | 0.90 | 1.01 |      |      |       |      | 981  | 102.1 | 7.78 |
| Q9H939 | Proline-serine-threonine phosphatase-interacting protein 2<br>OS=Homo sapiens GN=PSTPIP2 PE=1 SV=4 - [PPIP2_HUMAN] | 2.40  | 1 | 1  | 1  | 2   |      |      |      |      | 2.50 | 2.50 | 2.42  | 2.42 | 334  | 38.8  | 8.48 |
| Q07954 | Prolow-density lipoprotein receptor-related protein 1<br>OS=Homo sapiens GN=LRP1 PE=1 SV=2 - [LRP1_HUMAN]          | 8.21  | 1 | 27 | 27 | 46  | 1.02 | 1.07 | 1.00 | 1.03 | 1.01 | 1.02 | 1.16  | 1.18 | 4544 | 504.3 | 5.39 |

|        |                                                                                                       |       |   |    |    |     |      |      |      |      |      |      |      |      |       |       |       |
|--------|-------------------------------------------------------------------------------------------------------|-------|---|----|----|-----|------|------|------|------|------|------|------|------|-------|-------|-------|
| Q8IVL5 | Prolyl 3-hydroxylase 2 OS=Homo sapiens GN=LEPREL1 PE=1 SV=1 - [P3H2_HUMAN]                            | 6.92  | 1 | 2  | 2  | 2   | 0.83 | 0.80 | 0.82 | 0.80 |      | 708  | 80.9 | 5.71 |       |       |       |
| Q8IVL6 | Prolyl 3-hydroxylase 3 OS=Homo sapiens GN=LEPREL2 PE=2 SV=1 - [P3H3_HUMAN]                            | 3.26  | 1 | 2  | 2  | 2   |      |      |      |      | 2.38 | 2.47 | 2.57 | 2.66 | 736   | 81.8  | 6.32  |
| O15460 | Prolyl 4-hydroxylase subunit alpha-2 OS=Homo sapiens GN=P4HA2 PE=1 SV=1 - [P4HA2_HUMAN]               | 2.62  | 1 | 1  | 1  | 1   | 0.59 | 0.57 | 0.47 | 0.46 |      |      | 535  | 60.9 | 5.71  |       |       |
| Q7Z4N8 | Prolyl 4-hydroxylase subunit alpha-3 OS=Homo sapiens GN=P4HA3 PE=1 SV=1 - [P4HA3_HUMAN]               | 2.76  | 1 | 1  | 1  | 1   | 1.34 | 1.57 | 1.53 | 1.81 |      |      | 544  | 61.1 | 6.49  |       |       |
| P48147 | Prolyl endopeptidase OS=Homo sapiens GN=PREP PE=1 SV=2 - [PPCE_HUMAN]                                 | 3.52  | 1 | 1  | 1  | 1   |      |      |      |      | 1.00 | 0.64 | 1.34 | 0.85 | 710   | 80.6  | 5.86  |
| Q8N271 | Prominin-2 OS=Homo sapiens GN=PROM2 PE=1 SV=1 - [PROM2_HUMAN]                                         | 0.84  | 1 | 1  | 1  | 3   | 0.99 | 0.67 | 0.98 | 0.67 | 0.75 | 0.72 | 0.69 | 0.67 | 834   | 91.8  | 6.15  |
| P27918 | Properdin OS=Homo sapiens GN=CFP PE=1 SV=2 - [PROP_HUMAN]                                             | 38.17 | 1 | 14 | 15 | 139 | 1.33 | 1.15 | 1.15 | 1.13 | 0.79 | 0.86 | 0.92 | 0.92 | 469   | 51.2  | 7.90  |
| P05165 | Propionyl-CoA carboxylase alpha chain, mitochondrial OS=Homo sapiens GN=PCCA PE=1 SV=4 - [PCCA_HUMAN] | 4.67  | 1 | 2  | 2  | 6   | 1.04 | 1.05 | 0.82 | 0.84 |      |      |      | 728  | 80.0  | 7.52  |       |
| Q8NBP7 | Protein convertase subtilisin/kexin type 9 OS=Homo sapiens GN=PCSK9 PE=1 SV=3 - [PCSK9_HUMAN]         | 13.58 | 1 | 8  | 8  | 25  | 1.14 | 1.08 | 1.06 | 1.00 | 0.89 | 0.94 | 0.86 | 0.96 | 692   | 74.2  | 6.61  |
| Q92786 | Prospero homeobox protein 1 OS=Homo sapiens GN=PROX1 PE=1 SV=2 - [PROX1_HUMAN]                        | 3.12  | 1 | 1  | 2  | 2   | 1.02 | 0.66 | 0.78 | 0.50 |      |      |      | 737  | 83.2  | 7.18  |       |
| P34995 | Prostaglandin E2 receptor EP1 subtype OS=Homo sapiens GN=PTGER1 PE=2 SV=3 - [PE2R1_HUMAN]             | 1.74  | 1 | 1  | 1  | 1   |      |      |      |      | 1.22 | 1.10 | 1.53 | 1.38 | 402   | 41.8  | 11.72 |
| P23219 | Prostaglandin G/H synthase 1 OS=Homo sapiens GN=PTGS1 PE=1 SV=2 - [PGH1_HUMAN]                        | 1.50  | 2 | 1  | 1  | 3   | 1.17 | 1.39 | 1.09 | 1.30 |      |      |      | 599  | 68.6  | 7.23  |       |
| P41222 | Prostaglandin-H2 D-isomerase OS=Homo sapiens GN=PTGDS PE=1 SV=1 - [PTGDS_HUMAN]                       | 23.16 | 1 | 5  | 5  | 18  | 0.89 | 0.84 | 0.83 | 0.79 | 1.04 | 0.95 | 0.98 | 0.90 | 190   | 21.0  | 7.80  |
| Q6UY27 | Prostate and testis expressed protein 2 OS=Homo sapiens GN=PATE2 PE=2 SV=1 - [PATE2_HUMAN]            | 16.81 | 1 | 1  | 1  | 1   |      |      |      |      | 0.23 | 0.19 | 1.61 | 1.33 | 113   | 13.0  | 7.25  |
| Q86YD1 | Prostate tumor-overexpressed gene 1 protein OS=Homo sapiens GN=PTOV1 PE=1 SV=1 - [PTOV1_HUMAN]        | 4.57  | 1 | 1  | 1  | 3   | 1.37 | 1.05 | 1.35 | 1.04 |      |      |      | 416  | 46.8  | 10.54 |       |
| P07288 | Prostate-specific antigen OS=Homo sapiens GN=KLK3 PE=1 SV=2 - [KLK3_HUMAN]                            | 2.68  | 1 | 1  | 1  | 1   |      |      |      |      | 1.03 | 0.81 | 0.86 | 0.68 | 261   | 28.7  | 7.68  |
| P25786 | Proteasome subunit alpha type-1 OS=Homo sapiens GN=PSMA1 PE=1 SV=1 - [PSA1_HUMAN]                     | 8.37  | 1 | 2  | 2  | 2   | 0.88 | 0.90 | 0.93 | 0.96 |      |      |      | 263  | 29.5  | 6.61  |       |
| P28066 | Proteasome subunit alpha type-5 OS=Homo sapiens GN=PSMA5 PE=1 SV=3 - [PSA5_HUMAN]                     | 4.15  | 1 | 1  | 1  | 2   | 0.96 | 0.89 | 0.99 | 0.93 |      |      |      | 241  | 26.4  | 4.79  |       |
| P60900 | Proteasome subunit alpha type-6 OS=Homo sapiens GN=PSMA6 PE=1 SV=1 - [PSA6_HUMAN]                     | 5.28  | 1 | 1  | 1  | 3   |      |      |      |      | 0.81 | 0.88 | 0.87 | 0.94 | 246   | 27.4  | 6.76  |
| P49721 | Proteasome subunit beta type-2 OS=Homo sapiens GN=PSMB2 PE=1 SV=1 - [PSB2_HUMAN]                      | 5.47  | 1 | 1  | 1  | 2   | 0.62 | 0.66 | 0.59 | 0.63 |      |      |      | 201  | 22.8  | 7.02  |       |
| P28062 | Proteasome subunit beta type-8 OS=Homo sapiens GN=PSMB8 PE=1 SV=3 - [PSB8_HUMAN]                      | 8.33  | 1 | 2  | 2  | 5   | 0.81 | 0.84 | 0.89 | 0.92 | 0.87 | 0.90 | 0.97 | 1.00 | 276   | 30.3  | 7.43  |
| Q9NUX5 | Protection of telomeres protein 1 OS=Homo sapiens GN=POT1 PE=1 SV=1 - [POTE1_HUMAN]                   | 1.10  | 1 | 1  | 1  | 1   |      |      |      |      | 0.16 | 0.51 | 0.05 | 0.15 | 634   | 71.4  | 6.73  |
| P11171 | Protein 4.1 OS=Homo sapiens GN=EPB41 PE=1 SV=4 - [41_HUMAN]                                           | 0.93  | 1 | 1  | 1  | 2   | 1.21 | 1.01 | 1.09 | 0.92 | 1.63 | 2.02 | 1.29 | 1.59 | 864   | 97.0  | 5.58  |
| P55198 | Protein AF-17 OS=Homo sapiens GN=MLLT6 PE=1 SV=2 - [AF17_HUMAN]                                       | 2.65  | 1 | 1  | 1  | 1   | 0.75 | 0.41 | 0.77 | 0.42 |      |      |      | 1093 | 112.0 | 8.62  |       |
| Q8IVF2 | Protein AHNAK2 OS=Homo sapiens GN=AHNAK2 PE=1 SV=2 - [AHNK2_HUMAN]                                    | 0.72  | 1 | 2  | 2  | 2   | 1.39 | 1.26 | 1.04 | 0.96 | 1.28 | 1.15 | 1.40 | 1.26 | 5795  | 616.2 | 5.36  |
| Q5T1N1 | Protein AKNAD1 OS=Homo sapiens GN=AKNAD1 PE=2 SV=3 - [AKND1_HUMAN]                                    | 1.56  | 1 | 1  | 1  | 1   |      |      |      |      | 0.62 | 0.62 | 1.06 | 1.07 | 836   | 92.8  | 6.81  |
| P84996 | Protein ALEX OS=Homo sapiens GN=GNAS PE=1 SV=1 - [ALEX_HUMAN]                                         | 1.76  | 1 | 1  | 1  | 4   |      |      |      |      | 0.75 | 0.09 | 0.92 | 0.13 | 626   | 67.9  | 11.55 |

|        |                                                                                          |       |   |    |    |      |      |      |      |      |      |      |      |      |      |       |      |
|--------|------------------------------------------------------------------------------------------|-------|---|----|----|------|------|------|------|------|------|------|------|------|------|-------|------|
| P02760 | Protein AMBP OS=Homo sapiens GN=AMBP PE=1 SV=1 - [AMBP_HUMAN]                            | 57.39 | 1 | 20 | 20 | 1146 | 1.07 | 1.06 | 1.06 | 1.04 | 0.94 | 0.95 | 0.93 | 0.97 | 352  | 39.0  | 6.25 |
| Q8IY45 | Protein AMN1 homolog OS=Homo sapiens GN=AMN1 PE=2 SV=4 - [AMN1_HUMAN]                    | 5.81  | 1 | 1  | 1  | 1    |      |      |      |      | 1.42 | 1.42 | 1.36 | 1.36 | 258  | 28.4  | 7.85 |
| Q5VTE6 | Protein angel homolog 2 OS=Homo sapiens GN=ANGEL2 PE=2 SV=1 - [ANGE2_HUMAN]              | 0.92  | 1 | 1  | 1  | 1    | 1.06 | 0.83 | 1.02 | 0.80 |      |      |      |      | 544  | 62.3  | 7.81 |
| Q8J025 | Protein APCDD1 OS=Homo sapiens GN=APCDD1 PE=1 SV=1 - [APCD1_HUMAN]                       | 2.14  | 1 | 1  | 1  | 1    | 1.73 | 2.54 | 0.88 | 1.29 |      |      |      |      | 514  | 58.8  | 8.15 |
| Q96LA8 | Protein arginine N-methyltransferase 6 OS=Homo sapiens GN=PRMT6 PE=1 SV=1 - [ANM6_HUMAN] | 3.73  | 1 | 1  | 1  | 2    |      |      |      |      | 0.89 | 0.83 | 6.00 | 5.57 | 375  | 41.9  | 5.44 |
| Q9UKV8 | Protein argonaute-2 OS=Homo sapiens GN=EIF2C2 PE=1 SV=3 - [AGO2_HUMAN]                   | 1.40  | 1 | 1  | 1  | 1    | 0.87 | 0.93 | 0.93 | 1.00 |      |      |      |      | 859  | 97.1  | 9.19 |
| Q9HCK5 | Protein argonaute-4 OS=Homo sapiens GN=EIF2C4 PE=1 SV=2 - [AGO4_HUMAN]                   | 2.09  | 1 | 1  | 2  | 2    |      |      |      |      | 1.20 | 0.99 | 1.43 | 1.18 | 861  | 97.0  | 9.06 |
| Q96SD1 | Protein artemis OS=Homo sapiens GN=DCLRE1C PE=1 SV=2 - [DCR1C_HUMAN]                     | 1.01  | 1 | 1  | 1  | 1    |      |      |      |      | 1.48 | 1.29 | 1.06 | 0.92 | 692  | 78.4  | 6.02 |
| Q8N100 | Protein atonal homolog 7 OS=Homo sapiens GN=ATOH7 PE=2 SV=1 - [ATOH7_HUMAN]              | 8.55  | 1 | 1  | 1  | 4    |      |      |      |      | 0.58 | 0.56 | 0.48 | 0.47 | 152  | 16.9  | 9.51 |
| Q6PGQ7 | Protein aurora borealis OS=Homo sapiens GN=BORA PE=1 SV=2 - [BORA_HUMAN]                 | 2.50  | 1 | 2  | 2  | 2    |      |      |      |      | 0.69 | 0.68 | 0.69 | 0.69 | 559  | 61.2  | 4.94 |
| Q6PI77 | Protein BHLHb9 OS=Homo sapiens GN=BHLHB9 PE=2 SV=1 - [BHLH9_HUMAN]                       | 2.56  | 1 | 1  | 1  | 2    |      |      |      |      | 0.95 | 0.84 | 1.04 | 0.91 | 547  | 60.3  | 7.58 |
| Q96G01 | Protein bicaudal D homolog 1 OS=Homo sapiens GN=BICD1 PE=1 SV=3 - [BICD1_HUMAN]          | 2.36  | 1 | 2  | 2  | 3    |      |      |      |      | 0.88 | 0.92 | 0.69 | 0.73 | 975  | 110.7 | 5.81 |
| Q8WUW1 | Protein BRICK1 OS=Homo sapiens GN=BRK1 PE=1 SV=1 - [BRK1_HUMAN]                          | 6.67  | 1 | 1  | 1  | 1    | 0.75 | 0.79 | 0.72 | 0.75 |      |      |      |      | 75   | 8.7   | 5.45 |
| Q96NH3 | Protein broad-minded OS=Homo sapiens GN=BROMI PE=2 SV=4 - [BROMI_HUMAN]                  | 1.03  | 1 | 1  | 1  | 2    | 0.98 | 0.98 | 1.17 | 1.17 |      |      |      |      | 1257 | 144.7 | 6.74 |
| P15036 | Protein C-ets-2 OS=Homo sapiens GN=ETS2 PE=1 SV=1 - [ETS2_HUMAN]                         | 5.33  | 1 | 1  | 1  | 1    | 1.11 | 1.15 | 1.04 | 1.08 |      |      |      |      | 469  | 53.0  | 5.03 |
| Q9Y2B0 | Protein canopy homolog 2 OS=Homo sapiens GN=CNPY2 PE=1 SV=1 - [CNPY2_HUMAN]              | 4.40  | 1 | 1  | 1  | 3    |      |      |      |      | 0.99 | 0.92 | 1.05 | 0.98 | 182  | 20.6  | 4.92 |
| Q9BT09 | Protein canopy homolog 3 OS=Homo sapiens GN=CNPY3 PE=1 SV=1 - [CNPY3_HUMAN]              | 3.60  | 1 | 1  | 1  | 2    | 0.85 | 0.93 | 1.06 | 1.17 |      |      |      |      | 278  | 30.7  | 5.49 |
| Q8NG31 | Protein CASC5 OS=Homo sapiens GN=CASC5 PE=1 SV=3 - [CASC5_HUMAN]                         | 1.67  | 1 | 3  | 3  | 3    | 1.26 | 1.48 | 1.26 | 1.50 | 0.78 | 0.82 | 0.79 | 0.83 | 2342 | 265.2 | 5.47 |
| Q13948 | Protein CASP OS=Homo sapiens GN=CUX1 PE=1 SV=2 - [CASP_HUMAN]                            | 1.62  | 2 | 1  | 1  | 4    | 1.65 | 1.60 | 1.64 | 1.60 | 1.63 | 2.29 | 1.55 | 2.17 | 678  | 77.4  | 5.44 |
| Q9UKY7 | Protein CDV3 homolog OS=Homo sapiens GN=CDV3 PE=1 SV=1 - [CDV3_HUMAN]                    | 22.87 | 1 | 2  | 2  | 2    |      |      |      |      | 1.14 | 1.51 | 1.35 | 1.40 | 258  | 27.3  | 6.40 |
| Q8WUH1 | Protein Churchill OS=Homo sapiens GN=CHURC1 PE=1 SV=1 - [CHUR_HUMAN]                     | 5.36  | 1 | 1  | 1  | 1    |      |      |      |      |      |      | 1.03 | 1.08 | 112  | 12.9  | 4.84 |
| O75629 | Protein CREG1 OS=Homo sapiens GN=CREG1 PE=1 SV=1 - [CREG1_HUMAN]                         | 2.73  | 1 | 1  | 1  | 1    | 0.81 | 0.51 | 0.79 | 0.50 |      |      |      |      | 220  | 24.1  | 7.59 |
| Q96RT6 | Protein cTAGE-2 OS=Homo sapiens GN=CTAGE1 PE=1 SV=2 - [CTGE2_HUMAN]                      | 0.81  | 3 | 1  | 1  | 1    |      |      |      |      | 1.12 | 0.73 | 0.99 | 0.64 | 745  | 85.2  | 6.16 |
| O60888 | Protein CutA OS=Homo sapiens GN=CUTA PE=1 SV=2 - [CUTA_HUMAN]                            | 23.46 | 1 | 3  | 3  | 6    | 1.14 | 1.16 | 1.58 | 1.64 | 0.94 | 1.03 | 0.94 | 1.02 | 179  | 19.1  | 5.50 |
| Q9P219 | Protein Daple OS=Homo sapiens GN=CCDC88C PE=1 SV=3 - [DAPLE_HUMAN]                       | 0.79  | 1 | 1  | 2  | 7    | 0.80 | 1.03 | 0.86 | 1.10 |      |      |      |      | 2028 | 228.1 | 6.23 |
| Q9UBU7 | Protein DBF4 homolog A OS=Homo sapiens GN=DBF4 PE=1 SV=1 - [DBF4_HUMAN]                  | 1.19  | 1 | 1  | 1  | 1    |      |      |      |      | 3.55 | 3.53 | 3.17 | 3.16 | 674  | 76.8  | 7.90 |
| Q86Y01 | Protein deltex-1 OS=Homo sapiens GN=DTX1 PE=1 SV=1 - [DTX1_HUMAN]                        | 4.03  | 1 | 1  | 1  | 1    | 1.04 | 1.02 | 1.15 | 1.13 |      |      |      |      | 620  | 67.3  | 9.60 |

|        |                                                                                          |       |   |   |   |     |      |      |      |      |      |      |      |      |      |       |       |
|--------|------------------------------------------------------------------------------------------|-------|---|---|---|-----|------|------|------|------|------|------|------|------|------|-------|-------|
| O60610 | Protein diaphanous homolog 1 OS=Homo sapiens<br>GN=DIAPH1 PE=1 SV=2 - [DIAP1_HUMAN]      | 2.99  | 1 | 3 | 3 | 9   | 0.68 | 0.67 | 0.69 | 0.69 | 1.89 | 1.75 | 1.72 | 1.59 | 1272 | 141.3 | 5.41  |
| Q9NSV4 | Protein diaphanous homolog 3 OS=Homo sapiens<br>GN=DIAPH3 PE=1 SV=4 - [DIAP3_HUMAN]      | 5.11  | 1 | 4 | 4 | 4   | 0.89 | 0.81 | 1.05 | 0.96 | 0.98 | 0.80 | 1.06 | 0.86 | 1193 | 136.8 | 7.03  |
| P30101 | Protein disulfide-isomerase A3 OS=Homo sapiens GN=PDIA3<br>PE=1 SV=4 - [PDIA3_HUMAN]     | 8.32  | 1 | 4 | 4 | 10  | 0.59 | 0.58 | 0.57 | 0.56 | 0.82 | 0.83 | 0.80 | 0.81 | 505  | 56.7  | 6.35  |
| P13667 | Protein disulfide-isomerase A4 OS=Homo sapiens GN=PDIA4<br>PE=1 SV=2 - [PDIA4_HUMAN]     | 4.65  | 1 | 2 | 2 | 3   | 1.25 | 1.56 | 0.73 | 0.92 | 0.48 | 0.46 | 0.56 | 0.53 | 645  | 72.9  | 5.07  |
| Q15084 | Protein disulfide-isomerase A6 OS=Homo sapiens GN=PDIA6<br>PE=1 SV=1 - [PDIA6_HUMAN]     | 10.68 | 1 | 3 | 3 | 7   |      |      |      |      | 1.06 | 1.16 | 1.14 | 1.25 | 440  | 48.1  | 5.08  |
| P07237 | Protein disulfide-isomerase OS=Homo sapiens GN=P4HB<br>PE=1 SV=3 - [PDIA1_HUMAN]         | 14.37 | 1 | 6 | 6 | 14  | 1.33 | 1.41 | 1.18 | 1.22 | 0.67 | 0.69 | 0.70 | 0.72 | 508  | 57.1  | 4.87  |
| Q99497 | Protein DJ-1 OS=Homo sapiens GN=PARK7 PE=1 SV=2 -<br>[PARK7_HUMAN]                       | 41.80 | 1 | 8 | 8 | 107 | 0.91 | 0.84 | 0.81 | 0.80 | 1.12 | 1.08 | 1.01 | 1.01 | 189  | 19.9  | 6.79  |
| Q18PE1 | Protein Dok-7 OS=Homo sapiens GN=DOK7 PE=1 SV=1 -<br>[DOK7_HUMAN]                        | 1.59  | 1 | 1 | 1 | 1   | 0.89 | 0.98 | 0.87 | 0.96 |      |      |      |      | 504  | 53.1  | 6.89  |
| Q9Y3R5 | Protein dopey-2 OS=Homo sapiens GN=DOPEY2 PE=1 SV=5<br>- [DOP2_HUMAN]                    | 0.57  | 1 | 1 | 1 | 1   | 1.51 | 1.48 | 1.47 | 1.45 |      |      |      |      | 2298 | 258.1 | 6.29  |
| Q8N350 | Protein Dos OS=Homo sapiens GN=DOS PE=1 SV=2 -<br>[DOS_HUMAN]                            | 2.48  | 1 | 1 | 1 | 4   |      |      |      |      | 1.13 | 1.23 | 1.15 | 1.25 | 725  | 75.8  | 6.61  |
| Q9NYP3 | Protein downstream neighbor of Son OS=Homo sapiens<br>GN=DONSON PE=1 SV=2 - [DONS_HUMAN] | 2.83  | 1 | 1 | 1 | 1   |      |      |      |      | 0.72 | 0.24 | 0.72 | 0.24 | 566  | 62.7  | 8.66  |
| Q6NUT2 | Protein dpy-19 homolog 2 OS=Homo sapiens GN=DPY19L2<br>PE=1 SV=2 - [D19L2_HUMAN]         | 1.19  | 1 | 1 | 1 | 1   |      |      |      |      | 1.06 | 1.03 | 0.91 | 0.89 | 758  | 87.3  | 9.10  |
| Q8WYP5 | Protein ELYS OS=Homo sapiens GN=AHCTF1 PE=1 SV=3 -<br>[ELYS_HUMAN]                       | 2.96  | 1 | 4 | 4 | 4   | 1.16 | 1.15 | 1.06 | 1.06 | 0.85 | 0.86 | 0.88 | 0.89 | 2266 | 252.3 | 6.60  |
| Q03111 | Protein ENL OS=Homo sapiens GN=MLLT1 PE=1 SV=2 -<br>[ENL_HUMAN]                          | 1.97  | 1 | 2 | 2 | 4   | 1.01 | 0.97 | 1.39 | 1.34 | 0.86 | 0.80 | 1.03 | 0.60 | 559  | 62.0  | 8.59  |
| P49257 | Protein ERGIC-53 OS=Homo sapiens GN=LMAN1 PE=1<br>SV=2 - [LMAN1_HUMAN]                   | 9.61  | 1 | 3 | 3 | 6   | 0.93 | 0.89 | 0.94 | 0.91 | 1.01 | 0.90 | 0.87 | 0.77 | 510  | 57.5  | 6.77  |
| Q9HAT1 | Protein ERGIC-53-like OS=Homo sapiens GN=LMAN1L PE=2<br>SV=2 - [LMA1L_HUMAN]             | 2.85  | 1 | 1 | 1 | 1   |      |      |      |      | 0.63 | 0.65 | 0.55 | 0.56 | 526  | 57.1  | 7.83  |
| Q9NYK6 | Protein EURL homolog OS=Homo sapiens GN=EURL PE=2<br>SV=3 - [EURL_HUMAN]                 | 5.72  | 1 | 1 | 1 | 1   |      |      |      |      | 1.23 | 2.38 | 0.90 | 1.75 | 297  | 33.9  | 6.57  |
| Q13158 | Protein FADD OS=Homo sapiens GN=FADD PE=1 SV=1 -<br>[FADD_HUMAN]                         | 9.13  | 1 | 1 | 1 | 1   |      |      |      |      | 1.44 | 0.23 | 1.19 | 0.19 | 208  | 23.3  | 5.69  |
| Q5XKR9 | Protein FAM104B OS=Homo sapiens GN=FAM104B PE=2<br>SV=1 - [F104B_HUMAN]                  | 10.43 | 1 | 1 | 1 | 1   | 1.08 | 1.26 | 0.92 | 1.09 |      |      |      |      | 115  | 13.1  | 9.61  |
| Q96BN8 | Protein FAM105B OS=Homo sapiens GN=FAM105B PE=1<br>SV=3 - [F105B_HUMAN]                  | 1.99  | 1 | 1 | 1 | 3   |      |      |      |      | 1.61 | 1.37 | 1.39 | 1.18 | 352  | 40.2  | 5.47  |
| Q8TC76 | Protein FAM110B OS=Homo sapiens GN=FAM110B PE=1<br>SV=1 - [F110B_HUMAN]                  | 2.97  | 1 | 1 | 1 | 1   |      |      |      |      | 0.98 | 1.15 | 1.14 | 1.35 | 370  | 40.7  | 9.39  |
| Q8TAY7 | Protein FAM110D OS=Homo sapiens GN=FAM110D PE=2<br>SV=1 - [F110D_HUMAN]                  | 3.69  | 1 | 1 | 1 | 1   |      |      |      |      | 0.93 | 0.82 | 0.89 | 0.79 | 271  | 28.7  | 10.04 |
| Q9NRY5 | Protein FAM114A2 OS=Homo sapiens GN=FAM114A2 PE=1<br>SV=4 - [F1142_HUMAN]                | 3.56  | 1 | 1 | 1 | 1   | 1.85 | 1.36 | 1.45 | 1.09 |      |      |      |      | 505  | 55.4  | 4.88  |
| Q9C073 | Protein FAM117A OS=Homo sapiens GN=FAM117A PE=2<br>SV=1 - [F117A_HUMAN]                  | 3.53  | 1 | 1 | 1 | 1   |      |      |      |      | 0.45 | 0.37 | 1.57 | 1.31 | 453  | 48.3  | 8.31  |
| Q9BPY3 | Protein FAM118B OS=Homo sapiens GN=FAM118B PE=1<br>SV=1 - [F118B_HUMAN]                  | 10.54 | 1 | 2 | 2 | 2   |      |      |      |      | 0.78 | 0.86 | 1.00 | 1.10 | 351  | 39.5  | 5.99  |
| Q8IXS8 | Protein FAM126B OS=Homo sapiens GN=FAM126B PE=1<br>SV=1 - [F126B_HUMAN]                  | 2.26  | 1 | 1 | 1 | 4   |      |      |      |      | 0.83 | 0.41 | 0.94 | 0.48 | 530  | 58.6  | 7.90  |
| Q4G0M1 | Protein FAM132B OS=Homo sapiens GN=FAM132B PE=2<br>SV=2 - [F132B_HUMAN]                  | 2.26  | 1 | 1 | 1 | 1   |      |      |      |      | 0.96 | 0.71 | 0.93 | 0.69 | 354  | 37.3  | 9.83  |



|        |                                                                            |       |   |   |   |   |      |      |      |      |      |      |       |      |      |       |       |
|--------|----------------------------------------------------------------------------|-------|---|---|---|---|------|------|------|------|------|------|-------|------|------|-------|-------|
| Q49AJ0 | Protein FAM135B OS=Homo sapiens GN=FAM135B PE=2 SV=2 - [F135B_HUMAN]       | 1.07  | 1 | 1 | 1 | 1 |      |      |      |      | 2.14 | 2.12 | 0.93  | 0.92 | 1406 | 155.7 | 5.86  |
| Q6VEP3 | Protein FAM138A/B/C/F OS=Homo sapiens GN=FAM138A PE=2 SV=1 - [F138A_HUMAN] | 15.29 | 1 | 1 | 1 | 3 |      |      |      |      | 0.77 | 0.94 | 0.60  | 0.91 | 85   | 9.2   | 7.39  |
| Q8NE31 | Protein FAM13C OS=Homo sapiens GN=FAM13C PE=2 SV=2 - [FA13C_HUMAN]         | 2.22  | 1 | 1 | 1 | 2 |      |      |      |      | 0.91 | 0.73 | 0.78  | 0.62 | 585  | 65.7  | 5.73  |
| Q6UXT8 | Protein FAM150A OS=Homo sapiens GN=FAM150A PE=2 SV=1 - [F150A_HUMAN]       | 13.18 | 1 | 2 | 2 | 2 |      |      |      |      | 0.68 | 0.56 | 0.90  | 0.74 | 129  | 14.3  | 10.58 |
| Q6UX46 | Protein FAM150B OS=Homo sapiens GN=FAM150B PE=2 SV=2 - [F150B_HUMAN]       | 4.61  | 1 | 1 | 1 | 1 |      |      |      |      | 0.85 | 1.01 | 0.71  | 0.85 | 152  | 16.9  | 9.69  |
| Q5W0V3 | Protein FAM160B1 OS=Homo sapiens GN=FAM160B1 PE=2 SV=1 - [F16B1_HUMAN]     | 3.27  | 1 | 1 | 2 | 2 | 1.46 | 1.34 |      |      |      |      |       |      | 765  | 86.5  | 5.29  |
| Q86V87 | Protein FAM160B2 OS=Homo sapiens GN=FAM160B2 PE=2 SV=2 - [F16B2_HUMAN]     | 6.19  | 1 | 2 | 2 | 2 |      |      |      |      | 0.89 | 0.13 | 0.85  | 0.12 | 743  | 82.3  | 5.47  |
| Q96MY7 | Protein FAM161B OS=Homo sapiens GN=FAM161B PE=2 SV=2 - [F161B_HUMAN]       | 6.18  | 1 | 2 | 2 | 2 | 1.30 | 0.88 | 0.88 | 0.74 | 0.93 | 0.78 | 0.647 | 73.6 | 9.41 |       |       |
| Q96GL9 | Protein FAM163A OS=Homo sapiens GN=FAM163A PE=2 SV=1 - [F163A_HUMAN]       | 7.78  | 1 | 1 | 1 | 1 |      |      |      |      | 0.94 | 1.04 | 1.08  | 1.21 | 167  | 17.6  | 5.82  |
| P0C2L3 | Protein FAM163B OS=Homo sapiens GN=FAM163B PE=2 SV=1 - [F163B_HUMAN]       | 4.82  | 1 | 1 | 1 | 1 |      |      |      |      | 1.35 | 1.33 | 0.86  | 0.86 | 166  | 18.2  | 4.92  |
| Q96KS9 | Protein FAM167A OS=Homo sapiens GN=FAM167A PE=2 SV=1 - [F167A_HUMAN]       | 10.75 | 1 | 1 | 1 | 1 | 0.87 | 1.25 | 0.87 | 1.26 |      |      |       |      | 214  | 24.2  | 6.32  |
| Q5VUB5 | Protein FAM171A1 OS=Homo sapiens GN=FAM171A1 PE=1 SV=1 - [F1711_HUMAN]     | 1.69  | 1 | 1 | 1 | 1 | 0.66 | 0.69 | 0.70 | 0.73 |      |      |       |      | 890  | 97.8  | 6.58  |
| Q6UWF9 | Protein FAM180A OS=Homo sapiens GN=FAM180A PE=2 SV=1 - [F180A_HUMAN]       | 4.62  | 1 | 1 | 1 | 1 |      |      |      |      | 0.31 | 0.68 | 0.42  | 0.91 | 173  | 19.7  | 8.47  |
| Q8NB25 | Protein FAM184A OS=Homo sapiens GN=FAM184A PE=2 SV=3 - [F184A_HUMAN]       | 3.60  | 1 | 2 | 3 | 8 | 0.94 | 1.30 | 0.79 | 1.16 | 0.52 | 0.65 | 0.76  | 0.96 | 1140 | 132.9 | 5.83  |
| Q9ULE4 | Protein FAM184B OS=Homo sapiens GN=FAM184B PE=2 SV=3 - [F184B_HUMAN]       | 1.89  | 1 | 1 | 1 | 1 | 0.80 | 0.65 | 0.71 | 0.59 |      |      |       |      | 1060 | 121.0 | 6.18  |
| Q8IYM0 | Protein FAM186B OS=Homo sapiens GN=FAM186B PE=2 SV=2 - [F186B_HUMAN]       | 3.70  | 1 | 2 | 2 | 3 |      |      |      |      | 1.16 | 1.10 | 1.11  | 1.06 | 893  | 103.7 | 9.01  |
| A8MYZ0 | Protein FAM188B2 OS=Homo sapiens GN=FAM188B2 PE=3 SV=2 - [F1882_HUMAN]     | 5.56  | 1 | 1 | 1 | 2 | 1.26 | 1.67 | 0.91 | 1.21 |      |      |       |      | 360  | 41.0  | 7.91  |
| Q96ET8 | Protein FAM18B2 OS=Homo sapiens GN=FAM18B2 PE=1 SV=3 - [F18B2_HUMAN]       | 6.16  | 1 | 1 | 1 | 1 | 0.92 | 1.58 | 1.18 | 2.06 |      |      |       |      | 276  | 31.1  | 9.29  |
| Q9C0I3 | Protein FAM190A OS=Homo sapiens GN=FAM190A PE=2 SV=2 - [F190A_HUMAN]       | 1.67  | 1 | 1 | 1 | 1 |      |      |      |      | 1.03 |      |       |      | 900  | 99.4  | 7.83  |
| P78312 | Protein FAM193A OS=Homo sapiens GN=FAM193A PE=1 SV=2 - [F193A_HUMAN]       | 2.92  | 1 | 2 | 2 | 5 | 0.43 | 0.36 | 0.53 | 0.56 |      |      |       |      | 1265 | 139.9 | 6.48  |
| Q6ZU69 | Protein FAM205A OS=Homo sapiens GN=FAM205A PE=2 SV=4 - [F205A_HUMAN]       | 0.82  | 1 | 1 | 1 | 1 |      |      |      |      | 0.66 | 0.69 | 1.04  | 1.10 | 1335 | 148.0 | 8.29  |
| Q9UK61 | Protein FAM208A OS=Homo sapiens GN=FAM208A PE=1 SV=3 - [F208A_HUMAN]       | 2.34  | 1 | 3 | 3 | 7 | 1.09 | 0.95 | 1.17 | 1.02 | 1.42 | 1.19 | 1.24  | 1.04 | 1670 | 188.9 | 5.80  |
| Q96MK3 | Protein FAM20A OS=Homo sapiens GN=FAM20A PE=1 SV=4 [FA20A_HUMAN]           | 6.47  | 1 | 2 | 2 | 2 | 1.05 | 1.12 | 1.02 | 1.09 |      |      |       |      | 541  | 61.4  | 7.99  |
| Q32MH5 | Protein FAM214A OS=Homo sapiens GN=FAM214A PE=2 SV=2 - [F214A_HUMAN]       | 4.83  | 1 | 2 | 2 | 5 | 3.11 | 1.97 | 2.30 | 1.46 | 1.12 | 0.99 | 1.08  | 1.04 | 1076 | 121.6 | 7.90  |
| Q96MZ4 | Protein FAM218A OS=Homo sapiens GN=FAM218A PE=2 SV=1 - [F218A_HUMAN]       | 5.10  | 1 | 1 | 1 | 1 |      |      |      |      | 1.17 | 1.13 | 1.05  | 1.01 | 157  | 17.0  | 11.81 |
| Q5SNX5 | Protein FAM27E2 OS=Homo sapiens GN=FAM27E2 PE=2 SV=1 - [F27E2_HUMAN]       | 16.80 | 3 | 2 | 2 | 3 | 1.55 | 1.43 | 1.03 | 0.96 | 0.20 | 0.41 | 0.24  | 0.51 | 125  | 14.7  | 11.84 |
| Q92520 | Protein FAM3C OS=Homo sapiens GN=FAM3C PE=1 SV=1 - [FAM3C_HUMAN]           | 21.59 | 1 | 4 | 4 | 7 | 1.01 | 0.89 | 1.03 | 0.92 | 0.89 | 0.90 | 1.03  | 1.03 | 227  | 24.7  | 8.29  |

|        |                                                                                      |       |   |   |   |    |      |      |      |      |      |      |      |      |      |       |       |
|--------|--------------------------------------------------------------------------------------|-------|---|---|---|----|------|------|------|------|------|------|------|------|------|-------|-------|
| Q9ULQ0 | Protein FAM40B OS=Homo sapiens GN=FAM40B PE=2 SV=2<br>- [FA40B_HUMAN]                | 2.04  | 1 | 1 | 1 | 1  |      |      |      |      | 1.24 | 1.16 | 1.18 | 1.10 | 834  | 95.3  | 5.91  |
| Q3ZLR7 | Protein FAM48B1 OS=Homo sapiens GN=FAM48B1 PE=2<br>SV=2 - [F48B1_HUMAN]              | 1.94  | 1 | 1 | 1 | 2  | 0.96 | 0.67 | 0.86 | 0.60 |      |      |      |      | 823  | 89.4  | 8.78  |
| Q9NYF3 | Protein FAM53C OS=Homo sapiens GN=FAM53C PE=1 SV=1<br>- [FA53C_HUMAN]                | 7.65  | 1 | 1 | 1 | 2  | 0.96 | 0.99 | 1.00 | 1.04 |      |      |      |      | 392  | 43.1  | 8.65  |
| Q75VX8 | Protein FAM59B OS=Homo sapiens GN=FAM59B PE=2 SV=3<br>- [FA59B_HUMAN]                | 1.60  | 1 | 1 | 1 | 1  |      |      |      |      | 0.98 |      | 1.60 |      | 874  | 92.8  | 6.90  |
| Q6ZS17 | Protein FAM65A OS=Homo sapiens GN=FAM65A PE=1 SV=1<br>[FA65A_HUMAN]                  | 1.23  | 1 | 1 | 1 | 3  |      |      |      |      | 1.12 | 1.01 | 1.02 | 0.93 | 1223 | 132.2 | 6.28  |
| Q9Y4F9 | Protein FAM65B OS=Homo sapiens GN=FAM65B PE=1 SV=4<br>- [FA65B_HUMAN]                | 1.31  | 1 | 1 | 1 | 2  | 0.67 | 0.62 | 0.66 | 0.61 | 0.95 | 1.36 | 0.57 | 0.82 | 1068 | 118.4 | 5.41  |
| Q96MK2 | Protein FAM65C OS=Homo sapiens GN=FAM65C PE=2 SV=4<br>- [FA65C_HUMAN]                | 1.37  | 1 | 1 | 1 | 2  | 1.84 | 1.75 | 1.97 | 1.87 |      |      |      |      | 946  | 105.2 | 7.43  |
| Q5T7M9 | Protein FAM69A OS=Homo sapiens GN=FAM69A PE=2 SV=1<br>[FA69A_HUMAN]                  | 2.10  | 1 | 1 | 1 | 1  |      |      |      |      | 0.87 | 0.77 | 0.96 | 0.85 | 428  | 49.0  | 7.17  |
| Q8IYT1 | Protein FAM71A OS=Homo sapiens GN=FAM71A PE=2 SV=2<br>[FA71A_HUMAN]                  | 2.86  | 1 | 1 | 1 | 1  |      |      |      |      | 0.95 | 0.86 | 0.93 | 0.85 | 594  | 63.1  | 9.64  |
| Q8NAN2 | Protein FAM73A OS=Homo sapiens GN=FAM73A PE=2 SV=1<br>[FA73A_HUMAN]                  | 3.32  | 1 | 1 | 1 | 1  |      |      |      |      | 0.77 | 1.08 | 0.66 | 0.92 | 632  | 71.0  | 5.63  |
| Q5RGS2 | Protein FAM75A2 OS=Homo sapiens GN=FAM75A2 PE=3<br>SV=1 - [F75A2_HUMAN]              | 2.30  | 6 | 1 | 2 | 2  | 1.11 | 0.91 | 1.22 | 1.00 |      |      |      |      | 1347 | 148.6 | 8.85  |
| Q6ZQQ2 | Protein FAM75D1 OS=Homo sapiens GN=FAM75D1 PE=1<br>SV=1 - [F75D1_HUMAN]              | 2.03  | 3 | 2 | 3 | 3  | 1.00 | 1.23 | 1.00 | 1.23 |      |      |      |      | 1576 | 175.5 | 8.85  |
| Q6ZUB1 | Protein FAM75E1 OS=Homo sapiens GN=FAM75E1 PE=2<br>SV=2 - [F75E1_HUMAN]              | 0.42  | 1 | 1 | 1 | 1  |      |      |      |      | 1.13 | 1.10 | 1.12 | 1.09 | 1445 | 157.0 | 9.10  |
| Q96LP2 | Protein FAM81B OS=Homo sapiens GN=FAM81B PE=2 SV=3<br>- [FA81B_HUMAN]                | 2.65  | 1 | 1 | 1 | 1  |      |      |      |      | 1.17 | 1.01 | 1.00 | 0.86 | 452  | 52.0  | 9.10  |
| Q9BQN1 | Protein FAM83C OS=Homo sapiens GN=FAM83C PE=1 SV=3<br>- [FA83C_HUMAN]                | 5.89  | 1 | 2 | 2 | 4  | 0.78 | 0.60 | 0.93 | 0.67 |      |      |      |      | 747  | 81.0  | 8.07  |
| Q96KN4 | Protein FAM84A OS=Homo sapiens GN=FAM84A PE=1 SV=2<br>[FA84A_HUMAN]                  | 6.85  | 1 | 1 | 1 | 2  |      |      |      |      | 0.91 | 0.66 | 0.84 | 0.61 | 292  | 32.5  | 5.72  |
| Q9NVL1 | Protein FAM86C1 OS=Homo sapiens GN=FAM86C1 PE=2<br>SV=3 - [FA86C_HUMAN]              | 18.18 | 1 | 1 | 1 | 1  |      |      |      |      | 1.17 |      |      |      | 165  | 18.4  | 8.19  |
| Q658Y4 | Protein FAM91A1 OS=Homo sapiens GN=FAM91A1 PE=1<br>SV=3 - [F91A1_HUMAN]              | 2.15  | 3 | 1 | 3 | 26 | 0.85 | 1.13 | 0.90 | 1.20 |      |      |      |      | 838  | 93.8  | 6.39  |
| Q68CZ1 | Protein fantom OS=Homo sapiens GN=RPGRIP1L PE=1<br>SV=2 - [FTM_HUMAN]                | 1.37  | 1 | 1 | 1 | 4  | 0.81 | 1.08 | 0.79 | 1.07 | 0.28 | 0.32 | 0.81 | 0.92 | 1315 | 151.1 | 5.35  |
| Q96JP0 | Protein fem-1 homolog C OS=Homo sapiens GN=FEM1C<br>PE=2 SV=1 - [FEM1C_HUMAN]        | 3.57  | 1 | 1 | 2 | 2  | 1.04 | 1.91 | 1.23 | 2.28 |      |      |      |      | 617  | 68.6  | 7.68  |
| Q13045 | Protein flightless-1 homolog OS=Homo sapiens GN=FLII PE=1<br>SV=2 - [FLII_HUMAN]     | 1.10  | 1 | 1 | 1 | 7  | 1.24 | 1.32 | 1.23 | 1.31 | 0.83 | 1.01 | 0.82 | 1.05 | 1269 | 144.7 | 6.05  |
| Q5TBA9 | Protein furry homolog OS=Homo sapiens GN=FRY PE=1<br>SV=1 - [FRY_HUMAN]              | 0.66  | 5 | 1 | 3 | 3  |      |      |      |      | 0.80 | 0.74 | 0.76 | 0.70 | 3013 | 338.7 | 5.99  |
| O94915 | Protein furry homolog-like OS=Homo sapiens GN=FRYL PE=1<br>SV=2 - [FRYL_HUMAN]       | 2.36  | 2 | 4 | 5 | 11 | 0.57 | 0.62 | 0.55 | 0.61 | 2.09 | 1.68 | 1.14 | 0.92 | 3013 | 339.4 | 5.58  |
| O95866 | Protein G6b OS=Homo sapiens GN=G6B PE=1 SV=1 -<br>[G6B_HUMAN]                        | 19.92 | 1 | 5 | 5 | 17 |      |      |      |      | 1.15 | 1.17 | 1.14 | 1.13 | 241  | 26.1  | 9.61  |
| Q8N292 | Protein GAPT OS=Homo sapiens GN=GAPT PE=1 SV=1 -<br>[GAPT_HUMAN]                     | 13.38 | 1 | 1 | 1 | 1  | 0.95 | 1.22 | 1.10 | 1.43 |      |      |      |      | 157  | 17.9  | 8.44  |
| Q5U4N7 | Protein GDF5OS, mitochondrial OS=Homo sapiens<br>GN=GDF5OS PE=1 SV=2 - [GDF5O_HUMAN] | 3.60  | 1 | 1 | 1 | 1  |      |      |      |      | 0.91 | 0.85 | 1.14 | 1.06 | 250  | 28.2  | 12.03 |
| Q5VW38 | Protein GPR107 OS=Homo sapiens GN=GPR107 PE=2 SV=1<br>- [GP107_HUMAN]                | 2.67  | 1 | 1 | 1 | 2  |      |      |      |      | 0.68 | 0.66 | 3.56 | 3.46 | 600  | 66.9  | 7.24  |

|        |                                                                                                                       |       |   |   |   |    |      |      |      |      |      |      |       |      |      |       |       |
|--------|-----------------------------------------------------------------------------------------------------------------------|-------|---|---|---|----|------|------|------|------|------|------|-------|------|------|-------|-------|
| Q4ZG55 | Protein GREB1 OS=Homo sapiens GN=GREB1 PE=2 SV=1 - [GREB1_HUMAN]                                                      | 3.13  | 1 | 2 | 2 | 3  | 0.74 | 0.74 | 1.14 | 0.77 |      | 1949 | 216.3 | 6.95 |      |       |       |
| Q9ULI3 | Protein HEG homolog 1 OS=Homo sapiens GN=HEG1 PE=1 SV=3 - [HEG1_HUMAN]                                                | 5.50  | 1 | 5 | 5 | 16 | 1.44 | 1.56 | 1.33 | 1.48 | 1.01 | 0.83 | 1.13  | 0.95 | 1381 | 147.4 | 6.18  |
| Q9UJC3 | Protein Hook homolog 1 OS=Homo sapiens GN=HOOK1 PE=1 SV=2 - [HOOK1_HUMAN]                                             | 3.30  | 1 | 1 | 1 | 1  |      |      |      |      | 1.65 | 0.80 | 1.85  | 0.89 | 728  | 84.6  | 5.15  |
| Q96ED9 | Protein Hook homolog 2 OS=Homo sapiens GN=HOOK2 PE=1 SV=3 - [HOOK2_HUMAN]                                             | 5.15  | 1 | 2 | 2 | 2  | 0.79 | 0.86 | 0.94 | 1.03 |      |      |       |      | 719  | 83.2  | 5.47  |
| Q86VS8 | Protein Hook homolog 3 OS=Homo sapiens GN=HOOK3 PE=1 SV=2 - [HOOK3_HUMAN]                                             | 5.43  | 1 | 2 | 2 | 6  | 0.81 | 0.62 | 0.76 | 0.59 |      |      |       |      | 718  | 83.1  | 5.17  |
| Q1MX18 | Protein inscuteable homolog OS=Homo sapiens GN=INSC PE=1 SV=1 - [INSC_HUMAN]                                          | 4.84  | 1 | 1 | 1 | 1  |      |      |      |      | 0.44 | 0.11 | 0.54  | 0.14 | 579  | 63.4  | 5.52  |
| Q9ULD6 | Protein inturnd OS=Homo sapiens GN=INTU PE=2 SV=2 - [INTU_HUMAN]                                                      | 3.18  | 1 | 1 | 2 | 3  | 0.64 | 0.61 | 0.75 | 0.72 |      |      |       |      | 942  | 105.6 | 5.90  |
| P78504 | Protein jagged-1 OS=Homo sapiens GN=JAG1 PE=1 SV=3 - [JAG1_HUMAN]                                                     | 1.56  | 1 | 2 | 2 | 2  |      |      |      |      | 0.44 | 0.10 | 0.67  | 0.83 | 1218 | 133.7 | 6.06  |
| Q92833 | Protein Jumonji OS=Homo sapiens GN=JARID2 PE=1 SV=2 - [JARID2_HUMAN]                                                  | 2.57  | 1 | 2 | 3 | 4  | 0.94 | 0.58 | 0.71 | 0.44 |      |      |       |      | 1246 | 138.6 | 9.38  |
| O15033 | Protein KIAA0317 OS=Homo sapiens GN=KIAA0317 PE=2 SV=3 - [K0317_HUMAN]                                                | 1.94  | 1 | 1 | 1 | 1  | 1.34 | 1.11 | 1.07 | 0.89 |      |      |       |      | 823  | 94.2  | 7.25  |
| Q8WUJ3 | Protein KIAA1199 OS=Homo sapiens GN=KIAA1199 PE=1 SV=2 - [K1199_HUMAN]                                                | 2.72  | 1 | 3 | 3 | 4  | 0.98 | 0.88 | 0.92 | 0.82 | 0.77 | 0.90 | 1.05  | 1.22 | 1361 | 152.9 | 7.85  |
| Q8IX03 | Protein KIBRA OS=Homo sapiens GN=WWC1 PE=1 SV=1 - [KIBRA_HUMAN]                                                       | 0.99  | 1 | 1 | 1 | 2  |      |      |      |      | 1.40 | 1.16 | 1.21  | 1.00 | 1113 | 125.2 | 5.85  |
| Q9UKS6 | Protein kinase C and casein kinase substrate in neurons protein 3 OS=Homo sapiens GN=PACSN3 PE=1 SV=2 - [PACN3_HUMAN] | 2.12  | 1 | 1 | 1 | 1  |      |      |      |      | 0.64 | 0.86 | 0.52  | 0.71 | 424  | 48.5  | 6.18  |
| Q02156 | Protein kinase C epsilon type OS=Homo sapiens GN=PRKCE PE=1 SV=1 - [KPCE_HUMAN]                                       | 4.75  | 1 | 2 | 2 | 2  |      |      |      |      | 0.47 |      | 0.49  |      | 737  | 83.6  | 7.12  |
| P05129 | Protein kinase C gamma type OS=Homo sapiens GN=PRKCG PE=1 SV=3 - [KPCG_HUMAN]                                         | 0.86  | 1 | 1 | 1 | 1  | 1.16 | 1.59 | 0.96 | 1.32 |      |      |       |      | 697  | 78.4  | 7.46  |
| Q04759 | Protein kinase C theta type OS=Homo sapiens GN=PRKCQ PE=1 SV=3 - [KPCT_HUMAN]                                         | 3.68  | 1 | 1 | 2 | 2  |      |      |      |      | 1.26 | 1.23 | 1.41  | 1.39 | 706  | 81.8  | 7.61  |
| Q9ULU4 | Protein kinase C-binding protein 1 OS=Homo sapiens GN=ZMYND8 PE=1 SV=2 - [PKCB1_HUMAN]                                | 2.95  | 1 | 1 | 1 | 1  | 0.99 | 0.73 | 1.04 | 0.78 |      |      |       |      | 1186 | 131.6 | 7.20  |
| A5PL33 | Protein KRBA1 OS=Homo sapiens GN=KRBA1 PE=2 SV=2 - [KRBA1_HUMAN]                                                      | 3.30  | 1 | 2 | 2 | 5  | 0.85 | 0.69 | 0.93 | 0.77 | 1.08 | 1.28 | 0.61  | 0.73 | 1030 | 107.4 | 7.83  |
| Q8N9T8 | Protein KRI1 homolog OS=Homo sapiens GN=KRI1 PE=1 SV=2 - [KRI1_HUMAN]                                                 | 2.96  | 1 | 2 | 2 | 5  | 1.00 | 0.99 | 1.09 | 1.09 | 0.30 | 6.36 | 1.01  | #### | 709  | 83.2  | 5.17  |
| Q96RT1 | Protein LAP2 OS=Homo sapiens GN=ERBB2IP PE=1 SV=2 - [LAP2_HUMAN]                                                      | 1.27  | 1 | 1 | 1 | 1  |      |      |      |      | 1.25 | 0.93 | 1.35  | 1.00 | 1412 | 158.2 | 5.50  |
| Q6ICC9 | Protein LDOC1L OS=Homo sapiens GN=LDOC1L PE=2 SV=1 - [LDOCL_HUMAN]                                                    | 10.46 | 1 | 1 | 1 | 1  | 0.82 | 1.07 | 0.98 | 1.27 |      |      |       |      | 239  | 26.1  | 11.18 |
| Q8NG48 | Protein Lines homolog OS=Homo sapiens GN=LINS PE=2 SV=2 - [LINES_HUMAN]                                               | 2.77  | 2 | 3 | 3 | 3  | 0.93 | 1.08 | 0.96 | 1.17 |      |      |       |      | 757  | 85.8  | 6.52  |
| Q96GA3 | Protein LTV1 homolog OS=Homo sapiens GN=LTV1 PE=1 SV=1 - [LTV1_HUMAN]                                                 | 7.16  | 1 | 1 | 1 | 1  |      |      |      |      | 0.88 | 1.03 | 0.77  | 0.90 | 475  | 54.8  | 4.91  |
| Q86UE4 | Protein LYRIC OS=Homo sapiens GN=MTDH PE=1 SV=2 - [LYRIC_HUMAN]                                                       | 1.89  | 1 | 1 | 1 | 3  |      |      |      |      | 0.94 | 1.10 | 0.95  | 1.11 | 582  | 63.8  | 9.32  |
| Q8WZA0 | Protein LZIC OS=Homo sapiens GN=LZIC PE=1 SV=1 - [LZIC_HUMAN]                                                         | 4.21  | 1 | 1 | 1 | 3  |      |      |      |      | 4.52 | 3.87 | 4.50  | 3.84 | 190  | 21.5  | 4.94  |
| Q8N8X9 | Protein mab-21-like 3 OS=Homo sapiens GN=MAB21L3 PE=2 SV=2 - [MB213_HUMAN]                                            | 7.46  | 1 | 1 | 1 | 1  | 1.83 | 1.60 | 1.90 | 1.68 |      |      |       |      | 362  | 42.3  | 8.54  |
| Q7L590 | Protein MCM10 homolog OS=Homo sapiens GN=MCM10 PE=1 SV=2 - [MCM10_HUMAN]                                              | 1.26  | 1 | 1 | 1 | 1  | 0.74 | 0.87 | 1.04 | 1.24 |      |      |       |      | 875  | 98.1  | 8.75  |

|        |                                                                                                                          |       |   |   |   |    |      |      |      |      |      |      |       |      |      |       |      |
|--------|--------------------------------------------------------------------------------------------------------------------------|-------|---|---|---|----|------|------|------|------|------|------|-------|------|------|-------|------|
| Q7L592 | Protein midA homolog, mitochondrial OS=Homo sapiens GN=C2orf56 PE=1 SV=1 - [MIDA_HUMAN]                                  | 2.95  | 1 | 1 | 1 | 1  | 1.11 | 1.08 | 1.09 | 1.07 |      | 441  | 49.2  | 8.34 |      |       |      |
| Q6ZRQ5 | Protein MMS22-like OS=Homo sapiens GN=MMS22L PE=1 SV=3 - [MMS22_HUMAN]                                                   | 0.48  | 1 | 1 | 1 | 2  | 0.81 | 0.87 | 0.95 | 1.03 |      | 1243 | 142.2 | 7.12 |      |       |      |
| Q8NHV4 | Protein NEDD1 OS=Homo sapiens GN=NEDD1 PE=1 SV=1 - [NEDD1_HUMAN]                                                         | 5.91  | 1 | 1 | 1 | 1  | 0.98 | 0.83 | 1.38 | 1.16 |      | 660  | 71.9  | 7.97 |      |       |      |
| Q9BZQ8 | Protein Niban OS=Homo sapiens GN=FAM129A PE=1 SV=1 - [NIBAN_HUMAN]                                                       | 3.34  | 1 | 2 | 2 | 4  | 1.09 | 1.15 | 1.27 | 1.34 | 1.18 | 0.97 | 1.13  | 0.90 | 928  | 103.1 | 4.78 |
| Q86W13 | Protein NLRC5 OS=Homo sapiens GN=NLRC5 PE=1 SV=3 - [NLRC5_HUMAN]                                                         | 0.96  | 1 | 1 | 1 | 1  | 0.78 | 0.75 | 0.85 | 0.81 |      | 1866 | 204.5 | 6.44 |      |       |      |
| Q6P988 | Protein notum homolog OS=Homo sapiens GN=NOTUM PE=2 SV=2 - [NOTUM_HUMAN]                                                 | 3.02  | 1 | 1 | 1 | 1  |      |      |      |      | 0.83 | 0.90 | 1.72  | 1.86 | 496  | 55.7  | 7.55 |
| Q8WZA1 | Protein O-linked-mannose beta-1,2-N-acetylglucosaminyltransferase 1 OS=Homo sapiens GN=POMGNT1 PE=1 SV=2 - [PMGT1_HUMAN] | 5.45  | 1 | 2 | 2 | 3  | 1.12 | 1.09 | 1.03 | 1.01 |      | 660  | 75.2  | 6.83 |      |       |      |
| Q13438 | Protein OS-9 OS=Homo sapiens GN=OS9 PE=1 SV=1 - [OS9_HUMAN]                                                              | 2.40  | 1 | 1 | 1 | 1  |      |      |      |      | 0.98 | 0.91 | 0.83  | 0.77 | 667  | 75.5  | 4.87 |
| Q9BRX2 | Protein pelota homolog OS=Homo sapiens GN=PELO PE=1 SV=2 - [PELO_HUMAN]                                                  | 4.68  | 1 | 1 | 1 | 1  | 0.63 | 0.49 | 0.81 | 0.64 |      | 385  | 43.3  | 6.34 |      |       |      |
| Q96T49 | Protein phosphatase 1 regulatory inhibitor subunit 16B OS=Homo sapiens GN=PPP1R16B PE=1 SV=1 - [PP16B_HUMAN]             | 1.76  | 1 | 1 | 1 | 1  | 1.02 | 0.71 | 1.12 | 0.79 |      | 567  | 63.5  | 6.49 |      |       |      |
| O14974 | Protein phosphatase 1 regulatory subunit 12A OS=Homo sapiens GN=PPP1R12A PE=1 SV=1 - [MYPT1_HUMAN]                       | 4.56  | 1 | 3 | 3 | 4  | 0.70 | 0.74 | 0.73 | 0.77 | 2.18 | 2.47 | 2.25  | 2.55 | 1030 | 115.2 | 5.40 |
| Q96A00 | Protein phosphatase 1 regulatory subunit 14A OS=Homo sapiens GN=PPP1R14A PE=1 SV=1 - [PP14A_HUMAN]                       | 27.21 | 1 | 2 | 2 | 10 |      |      |      |      | 1.23 | 1.15 | 1.14  | 1.04 | 147  | 16.7  | 9.38 |
| Q5R3F8 | Protein phosphatase 1 regulatory subunit 29 OS=Homo sapiens GN=ELFN2 PE=1 SV=1 - [PPR29_HUMAN]                           | 3.05  | 1 | 2 | 2 | 2  | 0.51 | 0.52 | 0.48 | 0.49 |      | 0.13 | 0.84  | 820  | 89.6 | 7.62  |      |
| Q96LQ0 | Protein phosphatase 1 regulatory subunit 36 OS=Homo sapiens GN=PPP1R36 PE=1 SV=1 - [PPR36_HUMAN]                         | 4.03  | 1 | 1 | 1 | 1  | 4.20 | 3.44 | 4.41 | 3.61 |      | 422  | 49.4  | 9.36 |      |       |      |
| Q16821 | Protein phosphatase 1 regulatory subunit 3A OS=Homo sapiens GN=PPP1R3A PE=1 SV=3 - [PPR3A_HUMAN]                         | 0.98  | 1 | 1 | 1 | 3  | 0.50 | 0.74 | 0.36 | 0.54 |      | 1122 | 125.7 | 5.00 |      |       |      |
| P35813 | Protein phosphatase 1A OS=Homo sapiens GN=PPM1A PE=1 SV=1 - [PPM1A_HUMAN]                                                | 10.73 | 2 | 2 | 2 | 3  | 0.69 | 0.70 | 0.68 | 0.68 |      | 382  | 42.4  | 5.36 |      |       |      |
| Q5JR12 | Protein phosphatase 1J OS=Homo sapiens GN=PPM1J PE=1 SV=1 - [PPM1J_HUMAN]                                                | 6.14  | 2 | 2 | 2 | 2  | 1.14 | 1.22 | 0.96 | 1.03 |      | 505  | 54.8  | 7.46 |      |       |      |
| Q9Y6V0 | Protein piccolo OS=Homo sapiens GN=PCLO PE=1 SV=4 - [PCLO_HUMAN]                                                         | 1.05  | 1 | 4 | 4 | 6  | 0.89 | 1.29 | 0.87 | 1.27 | 0.60 | 0.33 | 0.70  | 0.42 | 5065 | 552.9 | 6.51 |
| Q5THK1 | Protein PRR14L OS=Homo sapiens GN=PRR14L PE=1 SV=1 - [PR14L_HUMAN]                                                       | 0.51  | 1 | 1 | 1 | 1  |      |      |      |      | 0.34 | 0.39 | 0.34  | 0.39 | 2151 | 237.2 | 6.33 |
| P48634 | Protein PRRC2A OS=Homo sapiens GN=PRRC2A PE=1 SV=3 - [PRC2A_HUMAN]                                                       | 0.93  | 1 | 1 | 1 | 1  |      |      |      |      | 2.15 | 1.96 | 1.99  | 1.81 | 2157 | 228.7 | 9.45 |
| Q9Y520 | Protein PRRC2C OS=Homo sapiens GN=PRRC2C PE=1 SV=4 - [PRC2C_HUMAN]                                                       | 1.35  | 1 | 3 | 3 | 4  | 1.14 | 1.13 | 1.24 | 1.21 | 0.72 | 0.84 | 0.72  | 0.84 | 2896 | 316.7 | 9.13 |
| Q8WUY3 | Protein prune homolog 2 OS=Homo sapiens GN=PRUNE2 PE=1 SV=3 - [PRUN2_HUMAN]                                              | 1.39  | 1 | 2 | 2 | 3  | 0.79 | 0.62 | 1.13 | 0.89 |      | 3088 | 340.4 | 4.45 |      |       |      |
| Q86TP1 | Protein prune homolog OS=Homo sapiens GN=PRUNE PE=1 SV=2 - [PRUNE_HUMAN]                                                 | 12.14 | 1 | 2 | 2 | 3  |      |      |      |      | 0.32 | 0.40 | 0.84  | 1.05 | 453  | 50.2  | 5.50 |
| Q7Z5B4 | Protein RIC-3 OS=Homo sapiens GN=RIC3 PE=1 SV=1 - [RIC3_HUMAN]                                                           | 5.42  | 1 | 1 | 1 | 1  | 0.47 | 0.40 | 0.52 | 0.45 |      | 369  | 41.1  | 5.10 |      |       |      |
| Q9H871 | Protein RMD5 homolog A OS=Homo sapiens GN=RMND5A PE=1 SV=1 - [RMD5A_HUMAN]                                               | 11.51 | 1 | 2 | 2 | 4  | 0.82 | 0.79 | 0.92 | 0.91 |      | 391  | 44.0  | 6.06 |      |       |      |
| P31949 | Protein S100-A11 OS=Homo sapiens GN=S100A11 PE=1 SV=2 - [S10AB_HUMAN]                                                    | 34.29 | 1 | 3 | 3 | 14 | 0.88 | 0.87 | 0.81 | 0.80 | 1.21 | 1.11 | 1.33  | 1.17 | 105  | 11.7  | 7.12 |
| P80511 | Protein S100-A12 OS=Homo sapiens GN=S100A12 PE=1 SV=2 - [S10AC_HUMAN]                                                    | 39.13 | 1 | 4 | 4 | 21 |      |      |      |      | 2.34 | 2.32 | 2.13  | 2.08 | 92   | 10.6  | 6.25 |

|        |                                                                                      |       |   |    |    |     |      |      |      |      |      |      |      |      |      |       |       |
|--------|--------------------------------------------------------------------------------------|-------|---|----|----|-----|------|------|------|------|------|------|------|------|------|-------|-------|
| P26447 | Protein S100-A4 OS=Homo sapiens GN=S100A4 PE=1 SV=1 - [S10A4_HUMAN]                  | 16.83 | 1 | 2  | 2  | 17  | 0.75 | 0.82 | 0.78 | 0.87 | 0.85 | 0.96 | 0.75 | 0.82 | 101  | 11.7  | 6.11  |
| P06703 | Protein S100-A6 OS=Homo sapiens GN=S100A6 PE=1 SV=1 - [S10A6_HUMAN]                  | 24.44 | 1 | 3  | 3  | 14  | 0.60 | 1.43 | 0.84 | 2.00 | 1.01 | 1.08 | 0.92 | 0.98 | 90   | 10.2  | 5.48  |
| P31151 | Protein S100-A7 OS=Homo sapiens GN=S100A7 PE=1 SV=4 - [S10A7_HUMAN]                  | 42.57 | 2 | 3  | 3  | 23  | 0.64 | 0.64 | 0.75 | 0.82 | 1.58 | 1.43 | 1.53 | 1.41 | 101  | 11.5  | 6.77  |
| P05109 | Protein S100-A8 OS=Homo sapiens GN=S100A8 PE=1 SV=1 - [S10A8_HUMAN]                  | 80.65 | 1 | 10 | 10 | 107 | 0.76 | 0.65 | 0.82 | 0.72 | 1.47 | 1.46 | 1.36 | 1.37 | 93   | 10.8  | 7.03  |
| P06702 | Protein S100-A9 OS=Homo sapiens GN=S100A9 PE=1 SV=1 - [S10A9_HUMAN]                  | 86.84 | 1 | 9  | 9  | 275 | 0.65 | 0.59 | 0.67 | 0.57 | 1.11 | 1.02 | 1.12 | 1.09 | 114  | 13.2  | 6.13  |
| P04271 | Protein S100-B OS=Homo sapiens GN=S100B PE=1 SV=2 - [S100B_HUMAN]                    | 16.30 | 1 | 1  | 1  | 1   |      |      |      |      | 1.42 | 2.66 | 1.56 | 2.93 | 92   | 10.7  | 4.59  |
| Q99590 | Protein SCAF11 OS=Homo sapiens GN=SCAF11 PE=1 SV=2 - [SCAFB_HUMAN]                   | 2.60  | 2 | 2  | 3  | 3   |      |      |      |      | 0.75 | 0.73 | 3.34 | 3.05 | 1463 | 164.6 | 8.41  |
| Q8N9R8 | Protein SCAI OS=Homo sapiens GN=SCAI PE=1 SV=2 - [SCAI_HUMAN]                        | 4.13  | 1 | 2  | 2  | 3   |      |      |      |      | 0.95 | 0.55 | 0.93 | 0.53 | 606  | 70.4  | 8.60  |
| O43819 | Protein SCO2 homolog, mitochondrial OS=Homo sapiens GN=SCO2 PE=1 SV=3 - [SCO2_HUMAN] | 17.29 | 1 | 2  | 2  | 2   |      |      |      |      | 0.78 | 0.86 | 0.85 | 0.94 | 266  | 29.8  | 8.85  |
| Q5TEA6 | Protein sel-1 homolog 2 OS=Homo sapiens GN=SEL1L2 PE=1 SV=2 - [SEL1L2_HUMAN]         | 3.05  | 1 | 1  | 1  | 7   | 1.41 | 1.42 | 1.32 | 1.30 |      |      |      |      | 688  | 77.9  | 9.23  |
| Q68CR1 | Protein sel-1 homolog 3 OS=Homo sapiens GN=SEL1L3 PE=1 SV=2 - [SEL1L3_HUMAN]         | 0.80  | 1 | 1  | 1  | 1   | 1.24 | 1.27 | 1.02 | 1.05 |      |      |      |      | 1132 | 128.5 | 7.28  |
| A0PJX4 | Protein shisa-3 homolog OS=Homo sapiens GN=SHISA3 PE=2 SV=1 - [SHSA3_HUMAN]          | 8.40  | 1 | 1  | 1  | 3   | 1.14 | 1.04 | 1.29 | 1.19 |      |      |      |      | 238  | 25.8  | 6.92  |
| A6NL88 | Protein shisa-7 OS=Homo sapiens GN=SHISA7 PE=2 SV=3 - [SHSA7_HUMAN]                  | 6.32  | 1 | 1  | 1  | 2   | 0.95 | 0.93 | 0.94 | 0.92 |      |      |      |      | 538  | 56.2  | 10.02 |
| Q8TF72 | Protein Shroom3 OS=Homo sapiens GN=SHROOM3 PE=1 SV=2 - [SHRM3_HUMAN]                 | 0.75  | 1 | 1  | 1  | 1   | 0.66 | 0.63 | 0.60 | 0.57 |      |      |      |      | 1996 | 216.7 | 7.80  |
| Q9ULL8 | Protein Shroom4 OS=Homo sapiens GN=SHROOM4 PE=1 SV=3 - [SHRM4_HUMAN]                 | 4.02  | 1 | 2  | 2  | 3   | 0.71 | 0.90 | 0.94 | 1.22 |      |      |      |      | 1493 | 164.8 | 6.65  |
| Q58EX2 | Protein sidekick-2 OS=Homo sapiens GN=SDK2 PE=1 SV=3 - [SDK2_HUMAN]                  | 2.76  | 1 | 3  | 3  | 3   | 1.04 | 1.06 | 1.09 | 1.12 |      |      |      |      | 2172 | 239.2 | 7.06  |
| Q9Y3B1 | Protein slowmo homolog 2 OS=Homo sapiens GN=SLMO2 PE=1 SV=2 - [SLMO2_HUMAN]          | 13.92 | 1 | 1  | 1  | 1   |      |      |      |      | 1.78 | 2.22 | 1.41 | 1.76 | 194  | 21.5  | 6.73  |
| Q9UPU9 | Protein Smaug homolog 1 OS=Homo sapiens GN=SAMD4A PE=1 SV=3 - [SMAG1_HUMAN]          | 3.06  | 1 | 1  | 1  | 1   |      |      |      |      | 0.57 | 0.70 | 0.60 | 0.74 | 718  | 79.4  | 8.32  |
| Q8ND04 | Protein SMG8 OS=Homo sapiens GN=SMG8 PE=1 SV=1 - [SMG8_HUMAN]                        | 6.66  | 1 | 2  | 2  | 2   | 0.87 | 0.93 | 1.08 | 1.16 |      |      |      |      | 991  | 109.6 | 7.68  |
| Q9H0W8 | Protein SMG9 OS=Homo sapiens GN=SMG9 PE=1 SV=1 - [SMG9_HUMAN]                        | 4.42  | 1 | 1  | 1  | 1   |      |      |      |      | 1.38 | 0.83 | 1.61 | 0.97 | 520  | 57.6  | 7.01  |
| P18583 | Protein SON OS=Homo sapiens GN=SON PE=1 SV=4 - [SON_HUMAN]                           | 0.91  | 1 | 1  | 1  | 1   | 0.79 | 0.66 | 0.62 | 0.52 |      |      |      |      | 2426 | 263.7 | 5.64  |
| Q8IVW8 | Protein spinster homolog 2 OS=Homo sapiens GN=SPNS2 PE=1 SV=2 - [SPNS2_HUMAN]        | 4.01  | 1 | 1  | 1  | 1   | 0.93 | 0.94 | 1.00 | 1.01 |      |      |      |      | 549  | 58.0  | 9.25  |
| Q6ZMD2 | Protein spinster homolog 3 OS=Homo sapiens GN=SPNS3 PE=2 SV=2 - [SPNS3_HUMAN]        | 2.73  | 1 | 1  | 1  | 1   |      |      |      |      | 1.27 | 0.66 | 1.24 | 0.64 | 512  | 54.7  | 6.52  |
| O43609 | Protein sprouty homolog 1 OS=Homo sapiens GN=SPRY1 PE=1 SV=2 - [SPY1_HUMAN]          | 4.70  | 1 | 1  | 1  | 1   |      |      |      |      | 1.12 | 1.15 | 0.96 | 0.99 | 319  | 35.1  | 8.24  |
| O43610 | Protein sprouty homolog 3 OS=Homo sapiens GN=SPRY3 PE=1 SV=2 - [SPY3_HUMAN]          | 6.60  | 1 | 1  | 1  | 2   | 0.38 | 0.53 | 0.64 | 0.89 |      |      |      |      | 288  | 31.2  | 7.40  |
| Q68D10 | Protein SPT2 homolog OS=Homo sapiens GN=SPTY2D1 PE=1 SV=3 - [SPT2_HUMAN]             | 5.99  | 1 | 2  | 2  | 5   | 0.93 | 1.09 | 1.06 | 1.25 | 0.96 | 1.28 | 1.04 | 1.16 | 685  | 75.6  | 9.79  |
| O60225 | Protein SSX5 OS=Homo sapiens GN=SSX5 PE=2 SV=3 - [SSX5_HUMAN]                        | 7.45  | 1 | 1  | 1  | 1   |      |      |      |      | 1.18 | 1.05 | 1.13 | 0.99 | 188  | 21.6  | 9.36  |

|        |                                                                                                              |      |   |   |   |    |      |      |      |      |      |      |      |      |      |       |       |  |  |  |      |       |      |  |
|--------|--------------------------------------------------------------------------------------------------------------|------|---|---|---|----|------|------|------|------|------|------|------|------|------|-------|-------|--|--|--|------|-------|------|--|
| A3KN83 | Protein strawberry notch homolog 1 OS=Homo sapiens GN=SBNO1 PE=1 SV=1 - [SBNO1_HUMAN]                        | 1.08 | 1 | 1 | 1 | 2  | 1.00 | 0.88 | 0.87 | 0.77 |      |      |      |      |      |       |       |  |  |  | 1393 | 154.2 | 7.88 |  |
| Q9Y2G9 | Protein strawberry notch homolog 2 OS=Homo sapiens GN=SBNO2 PE=2 SV=3 - [SBNO2_HUMAN]                        | 1.32 | 1 | 1 | 1 | 1  | 0.99 | 0.99 | 0.88 | 0.89 |      |      |      |      |      |       |       |  |  |  | 1366 | 150.2 | 6.52 |  |
| Q5T011 | Protein SZT2 OS=Homo sapiens GN=SZT2 PE=2 SV=3 - [SZT2_HUMAN]                                                | 0.64 | 1 | 1 | 2 | 49 | 0.92 | 1.62 | 0.92 | 1.62 |      |      |      |      |      |       |       |  |  |  | 3432 | 377.8 | 6.27 |  |
| Q9C0D5 | Protein TANC1 OS=Homo sapiens GN=TANC1 PE=1 SV=3 - [TANC1_HUMAN]                                             | 1.24 | 1 | 2 | 2 | 3  | 0.85 | 0.99 | 0.79 | 0.93 | 1.12 | 1.00 | 0.72 | 0.64 | 1861 | 202.1 | 8.32  |  |  |  |      |       |      |  |
| Q9HCD6 | Protein TANC2 OS=Homo sapiens GN=TANC2 PE=1 SV=3 - [TANC2_HUMAN]                                             | 1.31 | 1 | 1 | 1 | 3  | 0.84 | 0.73 | 0.96 | 0.84 |      |      |      |      | 1990 | 219.5 | 8.07  |  |  |  |      |       |      |  |
| Q969Z0 | Protein TBRG4 OS=Homo sapiens GN=TBRG4 PE=1 SV=1 - [TBRG4_HUMAN]                                             | 4.91 | 1 | 1 | 1 | 1  |      |      |      |      | 0.95 | 0.92 | 1.25 | 1.23 | 631  | 70.7  | 7.42  |  |  |  |      |       |      |  |
| Q8N1K5 | Protein THEMIS OS=Homo sapiens GN=THEMIS PE=1 SV=3 [THMS1_HUMAN]                                             | 1.40 | 1 | 1 | 1 | 1  | 1.08 | 1.25 | 1.42 | 1.67 |      |      |      |      | 641  | 73.4  | 5.90  |  |  |  |      |       |      |  |
| Q86X45 | Protein TILB homolog OS=Homo sapiens GN=LRRC6 PE=2 SV=3 - [TILB_HUMAN]                                       | 2.79 | 1 | 1 | 1 | 1  | 1.17 | 1.29 | 1.19 | 1.32 |      |      |      |      | 466  | 54.2  | 6.51  |  |  |  |      |       |      |  |
| Q9UNS1 | Protein timeless homolog OS=Homo sapiens GN=TIMELESS PE=1 SV=2 - [TIM_HUMAN]                                 | 1.32 | 1 | 1 | 1 | 2  | 0.62 | 0.53 | 0.71 | 0.61 |      |      |      |      | 1208 | 138.6 | 5.40  |  |  |  |      |       |      |  |
| Q4W5P6 | Protein TMEM155 OS=Homo sapiens GN=TMEM155 PE=2 SV=3 - [TM155_HUMAN]                                         | 9.23 | 1 | 1 | 1 | 1  | 0.89 | 1.15 |      |      |      |      |      |      | 130  | 14.2  | 10.26 |  |  |  |      |       |      |  |
| Q15436 | Protein transport protein Sec23A OS=Homo sapiens GN=SEC23A PE=1 SV=2 - [SEC23A_HUMAN]                        | 1.70 | 3 | 3 | 3 | 9  | 1.60 | 1.53 | 1.21 | 1.16 | 0.90 | 0.20 | 1.26 | 0.43 | 765  | 86.1  | 7.08  |  |  |  |      |       |      |  |
| O94855 | Protein transport protein Sec24D OS=Homo sapiens GN=SEC24D PE=1 SV=2 - [SEC24D_HUMAN]                        | 1.74 | 1 | 1 | 1 | 1  |      |      |      |      | 1.06 | 1.17 | 1.11 | 1.23 | 1032 | 112.9 | 7.25  |  |  |  |      |       |      |  |
| O94979 | Protein transport protein Sec31A OS=Homo sapiens GN=SEC31A PE=1 SV=3 - [SEC31A_HUMAN]                        | 2.62 | 1 | 2 | 3 | 6  |      |      |      |      | 0.91 | 0.81 | 0.95 | 0.84 | 1220 | 132.9 | 6.89  |  |  |  |      |       |      |  |
| Q9H9S3 | Protein transport protein Sec61 subunit alpha isoform 2 OS=Homo sapiens GN=SEC61A2 PE=2 SV=3 - [S61A2_HUMAN] | 2.73 | 1 | 1 | 1 | 1  |      |      |      |      | 0.37 | 0.54 | 1.01 | 1.49 | 476  | 52.2  | 8.06  |  |  |  |      |       |      |  |
| Q8WU66 | Protein TSPEAR OS=Homo sapiens GN=TSPEAR PE=2 SV=2 - [TSEAR_HUMAN]                                           | 2.69 | 1 | 1 | 1 | 1  |      |      |      |      | 0.69 | 0.66 | 0.65 | 0.61 | 669  | 74.9  | 6.44  |  |  |  |      |       |      |  |
| A2A3K4 | Protein tyrosine phosphatase domain-containing protein 1 OS=Homo sapiens GN=PTPDC1 PE=2 SV=1 - [PTPC1_HUMAN] | 1.59 | 1 | 1 | 1 | 2  |      |      |      |      | 0.95 | 1.06 | 3.50 | 3.90 | 754  | 84.4  | 7.55  |  |  |  |      |       |      |  |
| Q12974 | Protein tyrosine phosphatase type IVA 2 OS=Homo sapiens GN=PTP4A2 PE=1 SV=1 - [TP4A2_HUMAN]                  | 8.38 | 2 | 1 | 1 | 2  |      |      |      |      | 1.30 | 1.44 | 1.17 | 1.29 | 167  | 19.1  | 8.37  |  |  |  |      |       |      |  |
| Q9UPW8 | Protein unc-13 homolog A OS=Homo sapiens GN=UNC13A PE=2 SV=4 - [UN13A_HUMAN]                                 | 0.88 | 1 | 1 | 1 | 1  |      |      |      |      | 1.25 | 1.14 | 1.47 | 1.35 | 1703 | 192.9 | 5.35  |  |  |  |      |       |      |  |
| Q8NB66 | Protein unc-13 homolog C OS=Homo sapiens GN=UNC13C PE=1 SV=3 - [UN13C_HUMAN]                                 | 0.59 | 1 | 1 | 1 | 1  |      |      |      |      | 0.22 | 0.68 | 0.29 | 0.88 | 2214 | 250.8 | 5.92  |  |  |  |      |       |      |  |
| Q70J99 | Protein unc-13 homolog D OS=Homo sapiens GN=UNC13D PE=1 SV=1 - [UN13D_HUMAN]                                 | 2.84 | 1 | 2 | 2 | 7  | 0.81 | 0.68 | 1.12 | 0.95 | 1.02 | 0.87 | 0.86 | 0.74 | 1090 | 123.2 | 6.65  |  |  |  |      |       |      |  |
| Q9H3U1 | Protein unc-45 homolog A OS=Homo sapiens GN=UNC45A PE=1 SV=1 - [UN45A_HUMAN]                                 | 2.65 | 1 | 1 | 1 | 2  |      |      |      |      | 1.12 | 0.81 | 1.09 | 0.79 | 944  | 103.0 | 6.07  |  |  |  |      |       |      |  |
| Q9P2D8 | Protein unc-79 homolog OS=Homo sapiens GN=UNC79 PE=2 SV=3 - [UNC79_HUMAN]                                    | 2.24 | 1 | 3 | 3 | 4  | 0.95 | 0.56 | 1.24 | 1.05 |      |      |      |      | 2635 | 295.1 | 6.32  |  |  |  |      |       |      |  |
| Q8N2C7 | Protein unc-80 homolog OS=Homo sapiens GN=UNC80 PE=2 SV=2 - [UNC80_HUMAN]                                    | 0.74 | 1 | 2 | 2 | 12 | 2.37 | 2.60 | 2.30 | 2.52 |      |      |      |      | 3258 | 363.2 | 6.86  |  |  |  |      |       |      |  |
| Q76NI1 | Protein very KIND OS=Homo sapiens GN=KNDC1 PE=2 SV=2 - [VKIND_HUMAN]                                         | 2.06 | 1 | 2 | 2 | 3  | 0.86 | 0.71 | 1.06 | 0.88 | 0.13 | 0.12 | 0.37 | 0.35 | 1749 | 191.3 | 6.16  |  |  |  |      |       |      |  |
| Q69YN4 | Protein virilizer homolog OS=Homo sapiens GN=KIAA1429 PE=1 SV=2 - [VIR_HUMAN]                                | 0.77 | 1 | 1 | 1 | 1  |      |      |      | 0.51 |      |      |      |      | 1812 | 201.9 | 5.01  |  |  |  |      |       |      |  |
| Q8NEX5 | Protein WFDC9 OS=Homo sapiens GN=WFDC9 PE=2 SV=1 - [WFDC9_HUMAN]                                             | 5.62 | 1 | 1 | 1 | 4  |      |      |      |      | 1.69 | 1.77 | 0.99 | 2.08 | 89   | 10.5  | 7.55  |  |  |  |      |       |      |  |
| O95785 | Protein Wiz OS=Homo sapiens GN=WIZ PE=1 SV=2 - [WIZ_HUMAN]                                                   | 0.42 | 1 | 1 | 1 | 2  |      |      |      |      | 1.07 | 1.10 | 1.05 | 1.07 | 1651 | 178.6 | 6.86  |  |  |  |      |       |      |  |

|        |                                                                                                    |       |   |    |    |      |      |      |      |      |      |      |      |      |      |       |      |      |      |       |      |      |
|--------|----------------------------------------------------------------------------------------------------|-------|---|----|----|------|------|------|------|------|------|------|------|------|------|-------|------|------|------|-------|------|------|
| P56705 | Protein Wnt-4 OS=Homo sapiens GN=WNT4 PE=1 SV=4 - [WNT4_HUMAN]                                     | 3.99  | 1 | 1  | 1  | 1    |      |      |      |      |      |      |      |      | 0.82 | 0.72  | 0.81 | 0.72 | 351  | 39.0  | 8.51 |      |
| Q5T9L3 | Protein wntless homolog OS=Homo sapiens GN=WLS PE=1 SV=2 - [WLS_HUMAN]                             | 9.06  | 1 | 2  | 2  | 3    | 0.59 | 0.38 | 0.49 | 0.32 | 0.91 | 0.87 | 0.82 | 0.78 | 541  | 62.2  | 7.36 |      |      |       |      |      |
| Q9ULE0 | Protein WWC3 OS=Homo sapiens GN=WWC3 PE=2 SV=3 - [WWC3_HUMAN]                                      | 1.65  | 2 | 1  | 2  | 3    |      |      |      |      |      |      |      |      | 0.49 | 0.83  | 0.90 | 1.19 | 1092 | 122.6 | 6.37 |      |
| O75695 | Protein XRP2 OS=Homo sapiens GN=RP2 PE=1 SV=4 - [XRP2_HUMAN]                                       | 5.71  | 1 | 1  | 1  | 1    |      |      |      |      |      |      |      |      |      |       |      | 1.18 | 0.13 | 350   | 39.6 | 5.12 |
| Q9GZM5 | Protein YIPF3 OS=Homo sapiens GN=YIPF3 PE=1 SV=1 - [YIPF3_HUMAN]                                   | 2.86  | 1 | 1  | 1  | 3    |      |      |      |      |      |      |      |      | 1.30 | 1.21  | 1.24 | 1.15 | 350  | 38.2  | 5.76 |      |
| Q9UK55 | Protein Z-dependent protease inhibitor OS=Homo sapiens GN=SERPINA10 PE=1 SV=1 - [ZPI_HUMAN]        | 54.05 | 1 | 20 | 20 | 89   | 1.07 | 1.10 | 1.05 | 1.05 | 1.05 | 1.05 | 1.02 | 1.00 | 444  | 50.7  | 8.27 |      |      |       |      |      |
| Q75MW2 | Protein ZNF767 OS=Homo sapiens GN=ZNF767 PE=2 SV=1 - [ZNF767_HUMAN]                                | 7.10  | 1 | 1  | 1  | 1    | 1.43 | 1.18 | 1.16 | 0.96 |      |      |      |      |      |       |      |      |      | 155   | 17.2 | 9.64 |
| Q9C0D3 | Protein zyg-11 homolog B OS=Homo sapiens GN=ZYG11B PE=1 SV=2 - [ZYG11B_HUMAN]                      | 1.88  | 1 | 1  | 1  | 2    | 0.99 | 0.90 | 1.03 | 0.94 |      |      |      |      |      |       |      |      |      | 744   | 83.9 | 6.86 |
| Q9Y2J8 | Protein-arginine deiminase type-2 OS=Homo sapiens GN=PADI2 PE=1 SV=2 - [PADI2_HUMAN]               | 2.11  | 1 | 1  | 1  | 7    | 1.16 | 1.04 | 0.99 | 1.15 |      |      |      |      |      |       |      |      |      | 665   | 75.5 | 5.59 |
| Q9ULW8 | Protein-arginine deiminase type-3 OS=Homo sapiens GN=PADI3 PE=1 SV=2 - [PADI3_HUMAN]               | 2.11  | 1 | 1  | 1  | 1    | 0.97 | 0.98 | 1.01 | 1.03 |      |      |      |      |      |       |      |      |      | 664   | 74.7 | 5.54 |
| Q9UM07 | Protein-arginine deiminase type-4 OS=Homo sapiens GN=PADI4 PE=1 SV=2 - [PADI4_HUMAN]               | 2.56  | 1 | 1  | 1  | 1    | 1.07 | 1.05 | 1.09 | 1.07 |      |      |      |      |      |       |      |      |      | 663   | 74.0 | 6.58 |
| P49221 | Protein-glutamine gamma-glutamyltransferase 4 OS=Homo sapiens GN=TGM4 PE=1 SV=2 - [TGM4_HUMAN]     | 1.02  | 1 | 1  | 1  | 6    | 0.80 | 0.77 | 0.84 | 0.85 | 0.78 | 0.83 | 0.80 | 0.85 | 684  | 77.1  | 6.76 |      |      |       |      |      |
| Q08188 | Protein-glutamine gamma-glutamyltransferase E OS=Homo sapiens GN=TGM3 PE=1 SV=4 - [TGM3_HUMAN]     | 3.90  | 1 | 1  | 1  | 1    | 1.55 | 0.57 |      |      |      |      |      |      |      |       |      |      |      | 693   | 76.6 | 5.86 |
| Q96PF1 | Protein-glutamine gamma-glutamyltransferase Z OS=Homo sapiens GN=TGM7 PE=2 SV=1 - [TGM7_HUMAN]     | 5.21  | 1 | 1  | 1  | 1    |      |      |      |      |      |      |      |      | 1.30 | 1.55  | 1.42 | 1.69 | 710  | 79.9  | 7.01 |      |
| P28300 | Protein-lysine 6-oxidase OS=Homo sapiens GN=LOX PE=1 SV=2 - [LYOX_HUMAN]                           | 10.07 | 1 | 2  | 2  | 5    |      |      |      |      |      |      |      |      | 0.86 | 0.77  | 0.98 | 0.88 | 417  | 46.9  | 8.09 |      |
| Q8TDZ2 | Protein-methionine sulfoxide oxidase MICAL1 OS=Homo sapiens GN=MICAL1 PE=1 SV=2 - [MICAL1_HUMAN]   | 2.25  | 1 | 2  | 2  | 5    | 0.56 | 0.56 | 0.45 | 0.46 | 0.86 | 0.73 | 0.92 | 0.78 | 1067 | 117.8 | 6.40 |      |      |       |      |      |
| O94851 | Protein-methionine sulfoxide oxidase MICAL2 OS=Homo sapiens GN=MICAL2 PE=1 SV=1 - [MICAL2_HUMAN]   | 3.56  | 2 | 4  | 4  | 9    | 3.45 | 1.80 | 1.17 | 0.89 | 0.75 | 1.33 | 0.89 | 1.58 | 1124 | 126.6 | 8.65 |      |      |       |      |      |
| Q9Y2Y8 | Proteoglycan 3 OS=Homo sapiens GN=PRG3 PE=1 SV=2 - [PRG3_HUMAN]                                    | 3.56  | 1 | 1  | 1  | 6    | 1.24 | 1.12 | 1.60 | 1.43 | 1.07 | 1.18 | 0.83 | 0.92 | 225  | 25.4  | 4.81 |      |      |       |      |      |
| Q92954 | Proteoglycan 4 OS=Homo sapiens GN=PRG4 PE=1 SV=2 - [PRG4_HUMAN]                                    | 17.45 | 1 | 26 | 26 | 140  | 1.15 | 1.18 | 1.14 | 1.22 | 1.19 | 1.08 | 1.15 | 1.03 | 1404 | 151.0 | 9.50 |      |      |       |      |      |
| Q04941 | Proteolipid protein 2 OS=Homo sapiens GN=PLP2 PE=1 SV=1 - [PLP2_HUMAN]                             | 10.53 | 1 | 1  | 1  | 1    |      |      |      |      |      |      |      |      | 1.66 | 1.46  | 1.90 | 1.68 | 152  | 16.7  | 7.24 |      |
| P00734 | Prothrombin OS=Homo sapiens GN=F2 PE=1 SV=2 - [THRB_HUMAN]                                         | 62.54 | 1 | 41 | 41 | 2372 | 1.10 | 1.07 | 1.09 | 1.07 | 1.17 | 1.18 | 1.17 | 1.18 | 622  | 70.0  | 5.90 |      |      |       |      |      |
| Q04864 | Proto-oncogene c-Rel OS=Homo sapiens GN=REL PE=1 SV=1 - [REL_HUMAN]                                | 2.26  | 1 | 1  | 1  | 1    |      |      |      |      |      |      |      |      | 1.06 | 0.99  | 1.33 | 1.25 | 619  | 68.5  | 5.86 |      |
| P10911 | Proto-oncogene DBL OS=Homo sapiens GN=MCF2 PE=1 SV=3 - [MCF2_HUMAN]                                | 5.84  | 1 | 3  | 3  | 3    | 1.10 | 1.00 | 1.07 | 0.98 | 1.18 | 1.03 | 0.90 | 0.79 | 925  | 107.6 | 6.01 |      |      |       |      |      |
| P00540 | Proto-oncogene serine/threonine-protein kinase mos OS=Homo sapiens GN=MOS PE=2 SV=1 - [MOS_HUMAN]  | 2.60  | 1 | 1  | 1  | 2    | 1.21 | 1.14 | 1.21 | 1.14 |      |      |      |      |      |       |      |      |      | 346   | 37.8 | 8.91 |
| P07949 | Proto-oncogene tyrosine-protein kinase receptor Ret OS=Homo sapiens GN=RET PE=1 SV=3 - [RET_HUMAN] | 0.90  | 1 | 1  | 1  | 1    |      |      |      |      |      |      |      |      | 0.21 | 0.87  | 0.65 | 2.63 | 1114 | 124.2 | 6.60 |      |
| P12931 | Proto-oncogene tyrosine-protein kinase Src OS=Homo sapiens GN=SRC PE=1 SV=3 - [SRC_HUMAN]          | 6.34  | 1 | 2  | 2  | 2    | 1.17 | 1.45 | 1.21 | 1.52 | 0.97 | 1.09 | 0.94 | 1.05 | 536  | 59.8  | 7.42 |      |      |       |      |      |
| Q9Y5I2 | Protocadherin alpha-10 OS=Homo sapiens GN=PCDHA10 PE=2 SV=1 - [PCDAA_HUMAN]                        | 1.16  | 1 | 1  | 1  | 1    |      |      |      |      |      |      |      |      | 1.66 | 1.42  | 1.44 | 1.23 | 948  | 102.8 | 5.17 |      |

|        |                                                                                                  |       |   |   |   |    |      |      |      |      |      |      |       |      |      |       |      |
|--------|--------------------------------------------------------------------------------------------------|-------|---|---|---|----|------|------|------|------|------|------|-------|------|------|-------|------|
| Q9Y5I1 | Protocadherin alpha-11 OS=Homo sapiens GN=PCDHA11 PE=2 SV=1 - [PCDAB_HUMAN]                      | 1.69  | 1 | 1 | 1 | 1  | 0.67 | 0.75 | 1.13 | 1.26 |      | 949  | 103.2 | 5.36 |      |       |      |
| Q9Y5H7 | Protocadherin alpha-5 OS=Homo sapiens GN=PCDA5 PE=2 SV=1 - [PCDA5_HUMAN]                         | 4.91  | 1 | 2 | 2 | 4  |      |      |      |      | 1.09 | 0.95 | 0.91  | 0.79 | 936  | 102.0 | 5.43 |
| Q9H158 | Protocadherin alpha-C1 OS=Homo sapiens GN=PCDHAC1 PE=2 SV=2 - [PCDC1_HUMAN]                      | 2.39  | 1 | 1 | 1 | 1  |      |      |      |      | 1.04 | 0.89 | 0.76  | 0.65 | 963  | 103.9 | 5.21 |
| Q9Y5F1 | Protocadherin beta-12 OS=Homo sapiens GN=PCDHB12 PE=2 SV=1 - [PCDBC_HUMAN]                       | 2.77  | 1 | 1 | 1 | 3  | 1.02 | 0.78 | 0.97 | 0.76 |      |      |       |      | 795  | 86.7  | 4.84 |
| Q9NRJ7 | Protocadherin beta-16 OS=Homo sapiens GN=PCDHB16 PE=1 SV=3 - [PCDBG_HUMAN]                       | 1.42  | 1 | 1 | 1 | 1  | 1.41 | 1.36 | 1.53 | 1.49 |      |      |       |      | 776  | 84.9  | 5.11 |
| Q9Y5E7 | Protocadherin beta-2 OS=Homo sapiens GN=PCDHB2 PE=1 SV=1 - [PCDB2_HUMAN]                         | 2.51  | 1 | 2 | 2 | 5  | 0.85 | 0.84 | 0.85 | 0.84 | 0.81 | 0.82 | 0.85  | 0.87 | 798  | 87.2  | 4.89 |
| Q14517 | Protocadherin Fat 1 OS=Homo sapiens GN=FAT1 PE=1 SV=2 - [FAT1_HUMAN]                             | 1.24  | 1 | 2 | 2 | 5  | 1.10 | 1.01 | 1.14 | 1.05 |      |      |       |      | 4588 | 506.0 | 5.00 |
| Q9NYQ8 | Protocadherin Fat 2 OS=Homo sapiens GN=FAT2 PE=1 SV=2 - [FAT2_HUMAN]                             | 0.99  | 1 | 2 | 2 | 5  | 1.44 | 1.47 | 1.38 | 1.41 | 4.25 | 3.89 | 4.22  | 3.86 | 4349 | 479.0 | 5.16 |
| Q8TDW7 | Protocadherin Fat 3 OS=Homo sapiens GN=FAT3 PE=2 SV=2 - [FAT3_HUMAN]                             | 2.83  | 1 | 6 | 6 | 14 | 1.39 | 1.39 | 1.45 | 1.45 | 1.67 | 1.52 | 1.52  | 1.37 | 4589 | 505.2 | 4.87 |
| Q6V0I7 | Protocadherin Fat 4 OS=Homo sapiens GN=FAT4 PE=1 SV=2 - [FAT4_HUMAN]                             | 0.44  | 3 | 1 | 2 | 4  | 0.59 | 0.85 | 0.64 | 0.93 |      |      |       |      | 4981 | 542.4 | 4.94 |
| Q9Y5H4 | Protocadherin gamma-A1 OS=Homo sapiens GN=PCDHGA1 PE=2 SV=1 - [PCDG1_HUMAN]                      | 1.18  | 1 | 1 | 1 | 1  |      |      |      |      | 0.96 | 0.99 | 0.95  | 0.97 | 931  | 101.2 | 5.03 |
| Q9Y5H1 | Protocadherin gamma-A2 OS=Homo sapiens GN=PCDHGA2 PE=2 SV=1 - [PCDG2_HUMAN]                      | 6.55  | 1 | 3 | 3 | 3  | 0.10 | 0.07 | 0.29 | 0.21 | 0.07 | 0.11 | 0.86  | 1.40 | 932  | 101.4 | 5.01 |
| Q9Y5H0 | Protocadherin gamma-A3 OS=Homo sapiens GN=PCDHGA3 PE=2 SV=2 - [PCDG3_HUMAN]                      | 2.04  | 1 | 1 | 1 | 1  | 0.78 | 0.91 | 0.91 | 1.07 |      |      |       |      | 932  | 100.9 | 5.00 |
| Q9BZA7 | Protocadherin-11 X-linked OS=Homo sapiens GN=PCDH11X PE=2 SV=1 - [PC11X_HUMAN]                   | 2.30  | 2 | 2 | 2 | 3  |      |      |      |      | 0.93 | 1.02 | 0.95  | 1.03 | 1347 | 147.5 | 5.21 |
| Q96QU1 | Protocadherin-15 OS=Homo sapiens GN=PCDH15 PE=1 SV=2 - [PCD15_HUMAN]                             | 0.66  | 1 | 1 | 1 | 1  |      |      |      |      | 1.27 | 1.19 | 1.29  | 1.21 | 1955 | 215.9 | 5.07 |
| O14917 | Protocadherin-17 OS=Homo sapiens GN=PCDH17 PE=2 SV=2 - [PCD17_HUMAN]                             | 1.98  | 1 | 1 | 1 | 2  | 2.12 | 2.91 | 1.91 | 2.63 |      |      |       |      | 1159 | 126.2 | 5.19 |
| Q9HCL0 | Protocadherin-18 OS=Homo sapiens GN=PCDH18 PE=2 SV=3 - [PCD18_HUMAN]                             | 3.70  | 1 | 3 | 3 | 3  | 1.49 | 1.11 | 1.40 | 1.05 | 0.68 | 0.76 | 0.70  | 0.80 | 1135 | 126.1 | 5.15 |
| Q8N6Y1 | Protocadherin-20 OS=Homo sapiens GN=PCDH20 PE=2 SV=1 - [PCD20_HUMAN]                             | 2.71  | 1 | 1 | 1 | 1  | 0.78 | 1.03 | 0.88 | 1.16 |      |      |       |      | 924  | 101.9 | 4.94 |
| O60245 | Protocadherin-7 OS=Homo sapiens GN=PCDH7 PE=1 SV=2 - [PCDH7_HUMAN]                               | 4.77  | 1 | 2 | 3 | 3  | 0.64 | 0.29 | 0.69 | 0.31 |      |      |       |      | 1069 | 116.0 | 5.19 |
| O95206 | Protocadherin-8 OS=Homo sapiens GN=PCDH8 PE=2 SV=2 - [PCDH8_HUMAN]                               | 2.24  | 1 | 1 | 1 | 1  | 1.20 | 1.30 | 1.27 | 1.39 |      |      |       |      | 1070 | 112.9 | 5.54 |
| Q9HC56 | Protocadherin-9 OS=Homo sapiens GN=PCDH9 PE=1 SV=2 - [PCDH9_HUMAN]                               | 0.73  | 1 | 1 | 1 | 1  | 0.84 | 0.94 | 0.84 | 0.94 |      |      |       |      | 1237 | 136.0 | 5.47 |
| Q2VWP7 | Protogenin OS=Homo sapiens GN=PRTG PE=2 SV=1 - [PRTG_HUMAN]                                      | 2.43  | 1 | 1 | 1 | 1  |      |      |      |      | 0.78 | 0.82 | 0.80  | 0.84 | 1150 | 127.0 | 7.59 |
| Q7Z2H8 | Proton-coupled amino acid transporter 1 OS=Homo sapiens GN=SLC36A1 PE=1 SV=1 - [S36A1_HUMAN]     | 5.88  | 1 | 1 | 1 | 5  | 0.96 | 1.00 | 0.93 | 0.97 |      |      |       |      | 476  | 53.0  | 6.99 |
| Q96NT5 | Proton-coupled folate transporter OS=Homo sapiens GN=SLC46A1 PE=1 SV=1 - [PCFT_HUMAN]            | 3.05  | 1 | 1 | 1 | 3  |      |      |      |      | 0.67 | 0.74 | 0.53  | 0.58 | 459  | 49.7  | 8.81 |
| Q8IWL1 | Pulmonary surfactant-associated protein A2 OS=Homo sapiens GN=SFTPA2 PE=1 SV=1 - [SFFA2_HUMAN]   | 5.24  | 2 | 1 | 1 | 2  | 1.40 | 1.27 | 1.37 | 1.25 |      |      |       |      | 248  | 26.2  | 5.17 |
| P07988 | Pulmonary surfactant-associated protein B OS=Homo sapiens GN=SFTPB PE=1 SV=3 - [PSPB_HUMAN]      | 18.90 | 1 | 5 | 5 | 12 | 1.82 | 1.80 | 1.57 | 1.39 | 0.82 | 0.95 | 0.93  | 1.07 | 381  | 42.1  | 5.49 |
| Q86U38 | Pumilio domain-containing protein C14orf21 OS=Homo sapiens GN=C14orf21 PE=1 SV=1 - [CN021_HUMAN] | 3.14  | 1 | 1 | 2 | 2  | 1.45 | 1.51 | 1.38 | 1.44 |      |      |       |      | 636  | 69.4  | 7.28 |



|        |                                                                                                                                  |       |   |   |   |     |      |      |      |      |      |      |      |      |      |       |      |
|--------|----------------------------------------------------------------------------------------------------------------------------------|-------|---|---|---|-----|------|------|------|------|------|------|------|------|------|-------|------|
| Q8TB72 | Pumilio homolog 2 OS=Homo sapiens GN=PUM2 PE=1 SV=2<br>[PUM2_HUMAN]                                                              | 2.06  | 1 | 1 | 1 | 1   | 3.24 | 5.19 | 1.38 | 2.21 |      |      |      |      | 1066 | 114.1 | 7.08 |
| P00491 | Purine nucleoside phosphorylase OS=Homo sapiens GN=PNP<br>PE=1 SV=2 - [PNPH_HUMAN]                                               | 3.11  | 1 | 1 | 1 | 2   | 0.52 | 0.58 | 0.58 | 0.66 |      |      |      |      | 289  | 32.1  | 6.95 |
| P55786 | Puromycin-sensitive aminopeptidase OS=Homo sapiens<br>GN=NPEPPS PE=1 SV=2 - [PSA_HUMAN]                                          | 3.48  | 1 | 2 | 2 | 9   | 0.83 | 0.69 | 0.85 | 0.71 | 1.26 | 1.46 | 0.98 | 1.26 | 919  | 103.2 | 5.72 |
| Q6A1A2 | Putative 3-phosphoinositide-dependent protein kinase 2<br>OS=Homo sapiens GN=PDPK2 PE=5 SV=1 -<br>[PDPK2_HUMAN]                  | 4.04  | 2 | 1 | 1 | 1   |      |      |      |      | 1.11 | 1.14 | 1.04 | 1.07 | 396  | 44.7  | 8.37 |
| P20848 | Putative alpha-1-antitrypsin-related protein OS=Homo sapiens<br>GN=SERPINA2 PE=5 SV=1 - [A1ATR_HUMAN]                            | 3.33  | 1 | 1 | 2 | 147 | 1.75 | 1.56 | 1.70 | 1.50 | 0.79 | 0.70 | 0.82 | 0.72 | 420  | 47.9  | 7.90 |
| Q6NS11 | Putative ankyrin repeat domain-containing protein 26-like<br>protein OS=Homo sapiens GN=ANKRD26P1 PE=5 SV=2 -<br>[AR26L_HUMAN]   | 5.92  | 1 | 1 | 1 | 1   | 0.75 | 0.24 | 0.69 | 0.22 |      |      |      |      | 321  | 35.4  | 5.39 |
| A6NMY6 | Putative annexin A2-like protein OS=Homo sapiens<br>GN=ANXA2P2 PE=5 SV=2 - [AXA2L_HUMAN]                                         | 14.75 | 2 | 4 | 4 | 7   | 0.70 | 0.73 | 0.53 | 0.56 | 1.20 | 1.16 | 1.22 | 1.19 | 339  | 38.6  | 6.95 |
| A6NL99 | Putative aquaporin-7-like protein 3 OS=Homo sapiens<br>GN=AQP7P3 PE=5 SV=2 - [AQP73_HUMAN]                                       | 7.31  | 1 | 1 | 1 | 1   | 0.95 | 0.78 | 0.85 | 0.70 |      |      |      |      | 342  | 37.3  | 8.00 |
| Q16740 | Putative ATP-dependent Clp protease proteolytic subunit,<br>mitochondrial OS=Homo sapiens GN=CLPP PE=1 SV=1 -<br>[CLPP_HUMAN]    | 10.11 | 1 | 1 | 2 | 3   |      |      |      |      |      |      | 0.92 | 0.55 | 277  | 30.2  | 8.09 |
| Q7L2E3 | Putative ATP-dependent RNA helicase DHX30 OS=Homo<br>sapiens GN=DHX30 PE=1 SV=1 - [DHX30_HUMAN]                                  | 3.02  | 1 | 2 | 3 | 7   | 0.97 | 0.82 | 1.20 | 1.02 |      |      |      |      | 1194 | 133.9 | 8.78 |
| Q9H6R0 | Putative ATP-dependent RNA helicase DHX33 OS=Homo<br>sapiens GN=DHX33 PE=1 SV=2 - [DHX33_HUMAN]                                  | 6.08  | 1 | 2 | 2 | 9   |      |      |      |      | 0.87 | 1.54 | 0.73 | 1.30 | 707  | 78.8  | 8.91 |
| Q8NDG6 | Putative ATP-dependent RNA helicase TDRD9 OS=Homo<br>sapiens GN=TDRD9 PE=2 SV=3 - [TDRD9_HUMAN]                                  | 1.66  | 1 | 2 | 2 | 4   |      |      |      |      | 1.13 | 1.03 | 1.16 | 1.13 | 1382 | 155.6 | 7.05 |
| Q15486 | Putative beta-glucuronidase-like protein SMA3 OS=Homo<br>sapiens GN=GUSBP1 PE=5 SV=3 - [GUSP1_HUMAN]                             | 9.29  | 1 | 1 | 1 | 1   |      |      |      |      | 0.13 | 0.65 | 0.33 | 1.60 | 140  | 15.4  | 6.14 |
| Q5H9B9 | Putative BMP-2-inducible kinase-like protein OS=Homo<br>sapiens GN=BMP2KL PE=5 SV=2 - [BM2KL_HUMAN]                              | 3.65  | 1 | 1 | 1 | 2   | 1.41 | 0.82 | 1.50 | 0.87 |      |      |      |      | 411  | 46.1  | 5.63 |
| Q6WQI6 | Putative cancer susceptibility gene HEPN1 protein OS=Homo<br>sapiens GN=HEPN1 PE=5 SV=2 - [HEPN1_HUMAN]                          | 23.86 | 1 | 1 | 1 | 1   | 0.87 | 0.96 | 0.95 | 1.06 |      |      |      |      | 88   | 10.3  | 8.28 |
| A6NM15 | Putative COBW domain-containing protein 7 OS=Homo<br>sapiens GN=CBWD7 PE=5 SV=3 - [CBWD7_HUMAN]                                  | 7.29  | 6 | 2 | 2 | 2   | 0.77 | 0.96 | 0.75 | 0.93 |      |      |      |      | 247  | 28.2  | 5.52 |
| Q6ZSU1 | Putative cytochrome P450 2G1-like protein OS=Homo sapiens<br>PE=5 SV=1 - [C2G1L_HUMAN]                                           | 13.70 | 1 | 1 | 1 | 1   |      |      |      |      | 0.98 | 0.99 | 1.34 | 1.36 | 146  | 16.7  | 6.77 |
| P0C838 | Putative DAP-2 like protein C8orf68 OS=Homo sapiens<br>GN=C8orf68 PE=5 SV=1 - [CH068_HUMAN]                                      | 21.43 | 1 | 1 | 1 | 1   |      |      |      |      | 0.78 | 0.76 | 0.85 | 0.83 | 84   | 9.2   | 8.95 |
| Q6P1N9 | Putative deoxyribonuclease TATDN1 OS=Homo sapiens<br>GN=TATDN1 PE=1 SV=2 - [TATD1_HUMAN]                                         | 10.10 | 1 | 2 | 3 | 5   | 1.15 | 1.14 | 1.05 | 1.04 | 0.97 | 0.99 | 0.82 | 0.83 | 297  | 33.6  | 6.96 |
| Q6NVV9 | Putative disintegrin and metalloproteinase domain-containing<br>protein 5 OS=Homo sapiens GN=ADAM5P PE=5 SV=2 -<br>[ADAM5_HUMAN] | 1.70  | 1 | 1 | 1 | 1   | 0.63 | 0.59 | 0.61 | 0.58 |      |      |      |      | 412  | 47.2  | 6.80 |
| Q5T890 | Putative DNA repair and recombination protein RAD26-like<br>OS=Homo sapiens GN=RAD26L PE=1 SV=1 -<br>[RAD26_HUMAN]               | 1.83  | 1 | 1 | 1 | 1   |      |      |      |      | 0.05 | 0.02 | 0.26 | 0.13 | 712  | 81.0  | 9.01 |
| Q9H9P5 | Putative E3 ubiquitin-protein ligase UNKL OS=Homo sapiens<br>GN=UNKL PE=1 SV=3 - [UNKL_HUMAN]                                    | 6.03  | 1 | 1 | 1 | 1   | 1.10 | 0.85 | 1.48 | 1.14 |      |      |      |      | 680  | 73.8  | 8.06 |
| Q58FF3 | Putative endoplasmic-like protein OS=Homo sapiens<br>GN=HSP90B2P PE=5 SV=1 - [ENPLL_HUMAN]                                       | 4.01  | 1 | 1 | 2 | 3   | 1.50 | 1.16 | 1.52 | 1.19 |      |      |      |      | 399  | 45.8  | 5.26 |
| A0PJM3 | Putative exonuclease GOR-like protein OS=Homo sapiens<br>GN=REXO1L2P PE=5 SV=2 - [GORL_HUMAN]                                    | 1.72  | 2 | 1 | 1 | 1   |      |      |      |      | 1.15 | 0.66 | 0.87 | 0.50 | 583  | 64.2  | 9.23 |
| Q8NGA4 | Putative G-protein coupled receptor GPCR39 OS=Homo<br>sapiens PE=5 SV=2 - [GPC39_HUMAN]                                          | 5.88  | 1 | 1 | 1 | 16  |      |      |      |      | 1.14 | 0.97 | 1.10 | 1.03 | 272  | 30.3  | 9.26 |
| A6NGU5 | Putative gamma-glutamyltranspeptidase 3 OS=Homo sapiens<br>GN=GGT3P PE=5 SV=2 - [GGT3_HUMAN]                                     | 1.41  | 2 | 1 | 1 | 1   | 0.98 | 0.54 | 0.89 | 0.50 |      |      |      |      | 568  | 61.5  | 7.14 |
| Q8WZA8 | Putative gastric cancer-related gene 224 protein OS=Homo<br>sapiens GN=GCRG224 PE=5 SV=1 - [GC224_HUMAN]                         | 45.71 | 1 | 1 | 1 | 1   | 0.67 | 1.16 | 0.86 | 1.49 |      |      |      |      | 35   | 3.8   | 8.22 |

|        |                                                                                                                           |       |   |   |   |   |      |      |      |      |      |       |      |      |      |       |      |
|--------|---------------------------------------------------------------------------------------------------------------------------|-------|---|---|---|---|------|------|------|------|------|-------|------|------|------|-------|------|
| A8MS94 | Putative golgin subfamily A member 2-like protein 5 OS=Homo sapiens PE=5 SV=2 - [GG2L5_HUMAN]                             | 8.18  | 1 | 1 | 1 | 1 | 2.09 | 2.13 | 1.90 | 1.94 | 110  | 12.0  | 5.68 |      |      |       |      |
| A6NFL8 | Putative golgin subfamily A member 6-like protein 5 OS=Homo sapiens PE=5 SV=3 - [GG6L5_HUMAN]                             | 3.99  | 1 | 1 | 1 | 1 | 1.12 | 1.12 | 1.49 | 1.49 | 401  | 47.6  | 4.96 |      |      |       |      |
| A6NDN3 | Putative golgin subfamily A member 6B OS=Homo sapiens GN=GOLGA6B PE=5 SV=3 - [GOG6B_HUMAN]                                | 3.32  | 2 | 1 | 1 | 1 |      |      |      |      | 0.88 | 0.79  | 0.80 | 0.72 | 693  | 79.9  | 5.50 |
| A6NN73 | Putative golgin subfamily A member 8C OS=Homo sapiens GN=GOLGA8C PE=5 SV=2 - [GOG8C_HUMAN]                                | 4.19  | 1 | 1 | 1 | 1 | 1.07 | 0.42 | 1.22 | 0.48 | 597  | 67.1  | 8.54 |      |      |       |      |
| O43824 | Putative GTP-binding protein 6 OS=Homo sapiens GN=GTPBP6 PE=2 SV=3 - [GTPB6_HUMAN]                                        | 2.91  | 1 | 1 | 1 | 1 | 1.04 | 1.52 | 0.83 | 1.21 | 516  | 56.8  | 9.42 |      |      |       |      |
| Q14568 | Putative heat shock protein HSP 90-alpha A2 OS=Homo sapiens GN=HSP90AA2 PE=1 SV=2 - [HS902_HUMAN]                         | 7.87  | 3 | 3 | 4 | 4 | 0.86 | 1.03 | 0.94 | 1.14 | 343  | 39.3  | 4.65 |      |      |       |      |
| Q58FG1 | Putative heat shock protein HSP 90-alpha A4 OS=Homo sapiens GN=HSP90AA4P PE=5 SV=1 - [HS904_HUMAN]                        | 4.31  | 1 | 1 | 1 | 1 | 1.37 | 1.41 | 1.42 | 1.47 | 418  | 47.7  | 5.19 |      |      |       |      |
| Q9HCE1 | Putative helicase MOV-10 OS=Homo sapiens GN=MOV10 PE=1 SV=2 - [MOV10_HUMAN]                                               | 1.50  | 1 | 1 | 1 | 2 |      |      |      |      | 0.71 | 0.83  | 0.75 | 0.87 | 1003 | 113.6 | 8.82 |
| Q9BXT6 | Putative helicase Mov10l1 OS=Homo sapiens GN=MOV10L1 PE=1 SV=1 - [M10L1_HUMAN]                                            | 3.14  | 1 | 2 | 2 | 2 |      |      |      |      | 2.09 | 3.21  | 0.77 | 1.19 | 1211 | 135.2 | 6.46 |
| Q8N3S3 | Putative homeodomain transcription factor 2 OS=Homo sapiens GN=PHTF2 PE=2 SV=2 - [PHTF2_HUMAN]                            | 3.69  | 1 | 2 | 2 | 2 | 0.82 | 1.07 | 0.79 | 1.04 | 0.78 | 0.72  | 0.98 | 0.90 | 785  | 88.7  | 8.90 |
| Q2TVT3 | Putative keratinocyte growth factor-like protein 2 OS=Homo sapiens GN=KGFLP2 PE=5 SV=1 - [KGFL2_HUMAN]                    | 13.40 | 3 | 2 | 2 | 3 | 1.24 | 1.16 | 1.16 | 1.08 | 1.04 | 0.97  | 1.15 | 1.08 | 97   | 11.0  | 8.60 |
| Q5VSP4 | Putative lipocalin 1-like protein 1 OS=Homo sapiens GN=LCN1P1 PE=5 SV=1 - [LC1L1_HUMAN]                                   | 6.79  | 2 | 1 | 1 | 3 |      |      |      |      | 1.46 | 0.87  | 1.02 | 0.61 | 162  | 17.9  | 5.00 |
| Q8NE18 | Putative methyltransferase NSUN7 OS=Homo sapiens GN=NSUN7 PE=2 SV=4 - [NSUN7_HUMAN]                                       | 2.37  | 1 | 1 | 1 | 1 |      |      |      |      | 1.20 | 1.24  | 1.09 | 1.13 | 718  | 81.0  | 8.75 |
| A8MVU1 | Putative neutrophil cytosol factor 1C OS=Homo sapiens GN=NCF1C PE=5 SV=1 - [NCF1C_HUMAN]                                  | 4.10  | 3 | 1 | 1 | 1 | 1.17 | 1.07 | 1.30 | 1.20 | 366  | 41.8  | 8.84 |      |      |       |      |
| Q3KNT7 | Putative NOL1/NOP2/Sun domain family member 5B OS=Homo sapiens GN=NSUN5P1 PE=5 SV=1 - [NSN5B_HUMAN]                       | 11.66 | 1 | 1 | 1 | 1 |      |      |      |      | 0.42 | 4.71  | 0.41 | 4.58 | 163  | 17.7  | 5.73 |
| Q8NGY7 | Putative olfactory receptor 10J6 OS=Homo sapiens GN=OR10J6P PE=5 SV=1 - [O10J6_HUMAN]                                     | 5.07  | 1 | 1 | 1 | 2 |      |      |      |      | 0.87 | 0.85  | 0.61 | 0.59 | 276  | 31.0  | 8.53 |
| Q8NHC6 | Putative olfactory receptor 14L1 OS=Homo sapiens GN=OR14L1P PE=5 SV=1 - [O14L1_HUMAN]                                     | 5.19  | 1 | 1 | 1 | 1 |      |      |      |      | 0.18 | 0.27  | 0.98 | 1.46 | 308  | 34.7  | 8.40 |
| Q8NGU4 | Putative olfactory receptor 2I1 OS=Homo sapiens GN=OR2I1P PE=5 SV=1 - [OR2I1_HUMAN]                                       | 8.86  | 1 | 1 | 1 | 6 |      |      |      |      | 0.62 | 0.21  |      |      | 316  | 34.1  | 9.44 |
| Q8NGA2 | Putative olfactory receptor 7A2 OS=Homo sapiens GN=OR7A2P PE=5 SV=1 - [OR7A2_HUMAN]                                       | 5.81  | 1 | 1 | 1 | 1 | 1.05 | 1.12 | 0.93 | 1.00 | 310  | 34.4  | 6.89 |      |      |       |      |
| Q49A26 | Putative oxidoreductase GLYR1 OS=Homo sapiens GN=GLYR1 PE=1 SV=3 - [GLYR1_HUMAN]                                          | 5.97  | 7 | 1 | 2 | 4 | 0.83 | 0.51 | 1.35 | 0.83 | 553  | 60.5  | 9.17 |      |      |       |      |
| A8MUH7 | Putative PDZ domain-containing protein 1P OS=Homo sapiens GN=PDZK1P1 PE=5 SV=2 - [PDZ1P_HUMAN]                            | 2.99  | 2 | 1 | 1 | 1 | 0.89 | 1.01 | 0.87 | 0.99 | 402  | 44.0  | 5.63 |      |      |       |      |
| Q6GMV3 | Putative peptidyl-IRNA hydrolase PTRHD1 OS=Homo sapiens GN=PTRHD1 PE=1 SV=1 - [PTRD1_HUMAN]                               | 21.43 | 1 | 1 | 1 | 1 | 3.00 | 2.74 | 1.04 | 0.96 | 140  | 15.8  | 9.10 |      |      |       |      |
| A2A3N6 | Putative PIP5K1A and PSMD4-like protein OS=Homo sapiens GN=PIPSL PE=5 SV=1 - [PIPSL_HUMAN]                                | 3.02  | 1 | 1 | 1 | 1 |      |      |      |      | 1.17 | 1.22  | 1.23 | 1.28 | 862  | 95.0  | 5.71 |
| Q69YJ1 | Putative pleckstrin homology domain-containing family M member 1P OS=Homo sapiens GN=PLEKHM1P PE=5 SV=1 - [PKHMP_HUMAN]   | 2.88  | 2 | 1 | 1 | 2 | 0.96 | 0.64 | 0.91 | 0.61 | 0.31 | 0.35  | 0.33 | 0.38 | 520  | 58.9  | 6.33 |
| Q8IXJ9 | Putative Polycomb group protein ASXL1 OS=Homo sapiens GN=ASXL1 PE=1 SV=3 - [ASXL1_HUMAN]                                  | 2.53  | 1 | 1 | 1 | 2 | 1.22 | 1.28 | 1.19 | 1.25 | 1541 | 165.3 | 6.21 |      |      |       |      |
| Q9C0F0 | Putative Polycomb group protein ASXL3 OS=Homo sapiens GN=ASXL3 PE=2 SV=3 - [ASXL3_HUMAN]                                  | 2.05  | 1 | 2 | 2 | 3 |      |      |      |      | 1.58 | 1.45  | 1.38 | 1.29 | 2248 | 241.8 | 6.14 |
| Q6IS24 | Putative polypeptide N-acetylgalactosaminyltransferase-like protein 3 OS=Homo sapiens GN=WBSR17 PE=2 SV=2 - [GLTL3_HUMAN] | 5.18  | 1 | 2 | 2 | 3 | 1.10 | 1.32 | 1.17 | 1.42 | 598  | 67.7  | 8.90 |      |      |       |      |

|        |                                                                                                                                   |       |   |   |    |     |      |      |      |      |      |      |      |      |      |       |       |
|--------|-----------------------------------------------------------------------------------------------------------------------------------|-------|---|---|----|-----|------|------|------|------|------|------|------|------|------|-------|-------|
| A6NI47 | Putative POTE ankyrin domain family member M OS=Homo sapiens GN=POTEM PE=3 SV=2 - [POTEM_HUMAN]                                   | 9.45  | 2 | 2 | 2  | 6   | 1.12 | 1.34 | 1.01 | 1.20 | 1.22 | 1.14 | 1.18 | 1.10 | 508  | 57.0  | 7.06  |
| A6NMC2 | Putative PRAME family member 24 OS=Homo sapiens GN=PRAMEF24 PE=3 SV=1 - [PRA24_HUMAN]                                             | 2.74  | 3 | 1 | 1  | 1   | 0.82 | 0.97 | 0.82 | 0.98 |      |      |      |      | 474  | 53.6  | 6.52  |
| Q7L7V1 | Putative pre-mRNA-splicing factor ATP-dependent RNA helicase DHX32 OS=Homo sapiens GN=DHX32 PE=1 SV=1 - [DHX32_HUMAN]             | 2.02  | 1 | 1 | 1  | 1   |      |      |      |      | 1.05 | 0.81 | 1.00 | 0.77 | 743  | 84.4  | 4.97  |
| Q13046 | Putative pregnancy-specific beta-1-glycoprotein 7 OS=Homo sapiens GN=PSG7 PE=5 SV=2 - [PSG7_HUMAN]                                | 30.31 | 1 | 4 | 11 | 124 | 3.77 | 4.88 | 3.57 | 5.06 | 6.49 | 5.60 | 5.54 | 4.78 | 419  | 47.0  | 8.44  |
| A6NC97 | Putative protein FAM172B OS=Homo sapiens GN=FAM172BP PE=5 SV=3 - [F172B_HUMAN]                                                    | 2.49  | 1 | 1 | 1  | 1   |      |      |      |      | 1.37 | 3.51 |      |      | 362  | 41.9  | 8.43  |
| A8MTS5 | Putative protein FAM177A2 OS=Homo sapiens GN=FAM177A2 PE=5 SV=1 - [F1772_HUMAN]                                                   | 5.88  | 1 | 1 | 1  | 2   | 0.98 | 1.08 | 0.90 | 1.00 |      |      |      |      | 136  | 15.3  | 4.53  |
| A6NL58 | Putative protein FAM86A-like 2 OS=Homo sapiens PE=5 SV=3 - [F86A2_HUMAN]                                                          | 5.47  | 2 | 1 | 1  | 1   | 0.75 | 0.55 | 0.86 | 0.63 |      |      |      |      | 329  | 36.6  | 6.58  |
| A6NK25 | Putative protein FAM86A-like 3 OS=Homo sapiens PE=5 SV=2 - [F86A3_HUMAN]                                                          | 10.53 | 1 | 3 | 3  | 4   | 1.15 | 0.84 | 1.28 | 0.94 | 1.20 | 0.12 | 1.29 | 0.13 | 285  | 31.6  | 6.37  |
| A6NIG7 | Putative protein FAM86B-like 1 OS=Homo sapiens PE=3 SV=3 - [F86B3_HUMAN]                                                          | 5.42  | 1 | 1 | 1  | 2   | 0.76 | 0.73 | 0.91 | 0.89 |      |      |      |      | 295  | 32.8  | 6.32  |
| B8ZZ34 | Putative protein shisa-8 OS=Homo sapiens GN=SHISA8 PE=5 SV=2 - [SHSA8_HUMAN]                                                      | 1.83  | 1 | 1 | 1  | 2   |      |      |      |      | 0.76 | 0.68 | 0.66 | 0.59 | 492  | 51.4  | 10.83 |
| Q8N8H1 | Putative protein ZNF321 OS=Homo sapiens GN=ZNF321P PE=5 SV=3 - [ZN321_HUMAN]                                                      | 7.93  | 1 | 1 | 1  | 1   |      |      |      |      | 2.45 | 2.54 | 2.19 | 2.27 | 164  | 19.0  | 7.01  |
| A8MT19 | Putative rhophilin-2-like protein OS=Homo sapiens PE=5 SV=2 - [RHN2L_HUMAN]                                                       | 2.74  | 1 | 1 | 1  | 1   | 1.03 | 0.96 | 0.99 | 0.93 |      |      |      |      | 583  | 65.9  | 6.98  |
| Q96IC2 | Putative RNA exonuclease NEF-sp OS=Homo sapiens GN=44M2.3 PE=2 SV=1 - [REXON_HUMAN]                                               | 4.39  | 1 | 2 | 2  | 3   | 0.94 | 1.02 | 0.93 | 1.01 | 0.86 | 0.94 | 1.07 | 1.17 | 774  | 86.8  | 8.32  |
| A6NG73 | Putative RNA polymerase II subunit A C-terminal domain phosphatase SSU72-like protein 3 OS=Homo sapiens PE=3 SV=2 - [S72L3_HUMAN] | 12.89 | 3 | 2 | 2  | 2   | 0.67 | 0.71 | 0.72 | 0.77 | 0.98 | 0.78 | 0.89 | 0.70 | 194  | 22.5  | 5.60  |
| Q8IXW5 | Putative RNA polymerase II subunit B1 CTD phosphatase RPAP2 OS=Homo sapiens GN=RPAP2 PE=1 SV=1 - [RPAP2_HUMAN]                    | 4.90  | 1 | 2 | 2  | 3   | 1.29 | 0.85 | 1.13 | 0.88 |      |      |      |      | 612  | 69.5  | 7.78  |
| Q96T37 | Putative RNA-binding protein 15 OS=Homo sapiens GN=RBM15 PE=1 SV=2 - [RBM15_HUMAN]                                                | 1.23  | 1 | 1 | 1  | 1   |      |      |      |      | 0.94 | 1.06 | 0.83 | 0.94 | 977  | 107.1 | 10.08 |
| Q8NDT2 | Putative RNA-binding protein 15B OS=Homo sapiens GN=RBM15B PE=1 SV=3 - [RB15B_HUMAN]                                              | 2.25  | 1 | 1 | 1  | 1   | 1.32 | 1.21 | 1.84 | 1.69 |      |      |      |      | 890  | 97.1  | 9.85  |
| Q9Y383 | Putative RNA-binding protein Luc7-like 2 OS=Homo sapiens GN=LUC7L2 PE=1 SV=2 - [LC7L2_HUMAN]                                      | 4.59  | 1 | 1 | 1  | 1   |      |      |      |      | 1.63 | 1.72 | 1.57 | 1.65 | 392  | 46.5  | 10.01 |
| A8MVG2 | Putative selection and upkeep of intraepithelial T-cells protein 1 homolog OS=Homo sapiens GN=SKINT1 PE=5 SV=2 - [SKIT1_HUMAN]    | 5.05  | 1 | 1 | 1  | 6   | 1.48 | 1.12 | 1.36 | 1.04 | 0.49 | 0.78 | 0.42 | 0.66 | 218  | 25.4  | 5.87  |
| Q6UXR4 | Putative serpin A13 OS=Homo sapiens GN=SERPINA13 PE=5 SV=1 - [SPA13_HUMAN]                                                        | 12.70 | 1 | 3 | 3  | 3   |      |      |      |      | 0.82 | 0.96 | 0.81 | 0.95 | 307  | 34.8  | 6.40  |
| P0C7V7 | Putative signal peptidase complex catalytic subunit SEC11B OS=Homo sapiens GN=SEC11B PE=5 SV=1 - [SC11B_HUMAN]                    | 4.82  | 1 | 1 | 1  | 1   | 1.04 | 0.95 | 1.03 | 0.94 |      |      |      |      | 166  | 19.1  | 9.66  |
| Q9BZL3 | Putative small membrane protein NID67 OS=Homo sapiens GN=NID67 PE=2 SV=1 - [NID67_HUMAN]                                          | 18.33 | 1 | 1 | 1  | 2   |      |      |      |      | 0.99 | 0.92 | 1.39 | 1.30 | 60   | 6.6   | 7.34  |
| Q6ZMV5 | Putative SMEK homolog 3 OS=Homo sapiens GN=SMEK3P PE=5 SV=2 - [SMEK3_HUMAN]                                                       | 1.56  | 1 | 1 | 1  | 1   |      |      |      |      | 0.74 | 0.81 | 0.78 | 0.85 | 832  | 95.7  | 4.82  |
| Q9HBR0 | Putative sodium-coupled neutral amino acid transporter 10 OS=Homo sapiens GN=SLC38A10 PE=1 SV=2 - [S38AA_HUMAN]                   | 3.04  | 1 | 2 | 2  | 3   | 1.12 | 1.18 | 1.13 | 1.19 | 0.74 | 0.54 | 0.83 | 0.61 | 1119 | 119.7 | 5.73  |
| Q495Y7 | Putative speedy protein E7 OS=Homo sapiens GN=SPDYE7P PE=5 SV=1 - [SPDE7_HUMAN]                                                   | 4.81  | 7 | 1 | 1  | 1   |      |      |      |      | 1.44 | 1.64 | 1.25 | 1.42 | 208  | 25.2  | 8.44  |
| P0C672 | Putative tetraspanin-19 OS=Homo sapiens GN=TSPAN19 PE=5 SV=1 - [TSN19_HUMAN]                                                      | 4.84  | 1 | 1 | 1  | 1   |      |      |      |      | 0.74 | 0.75 | 0.64 | 0.65 | 248  | 28.4  | 7.64  |
| Q9UF72 | Putative TP73 antisense gene protein 1 OS=Homo sapiens GN=TP73-AS1 PE=5 SV=1 - [T73AS_HUMAN]                                      | 10.45 | 1 | 1 | 1  | 5   | 1.42 | 1.24 | 1.43 | 1.29 |      |      |      |      | 201  | 20.6  | 6.42  |

|        |                                                                                                              |       |   |   |   |    |      |      |      |      |      |      |      |      |     |      |       |
|--------|--------------------------------------------------------------------------------------------------------------|-------|---|---|---|----|------|------|------|------|------|------|------|------|-----|------|-------|
| A6NLI5 | Putative tripartite motif-containing protein 64C OS=Homo sapiens GN=TRIM64C PE=5 SV=3 - [TR64C_HUMAN]        | 4.70  | 1 | 1 | 1 | 2  | 0.43 | 0.50 | 0.54 | 0.62 |      | 447  | 51.3 | 5.52 |     |      |       |
| A6NL28 | Putative tropomyosin alpha-3 chain-like protein OS=Homo sapiens PE=5 SV=2 - [TPM3L_HUMAN]                    | 10.31 | 1 | 1 | 2 | 10 |      |      |      |      | 3.03 | 2.28 | 2.97 | 2.24 | 223 | 26.3 | 4.51  |
| Q8NHM4 | Putative trypsin-6 OS=Homo sapiens GN=TRY6 PE=5 SV=1 - [TRY6_HUMAN]                                          | 20.24 | 1 | 1 | 2 | 45 |      |      |      |      | 0.83 | 1.09 | 0.76 | 0.99 | 247 | 26.5 | 6.27  |
| O14990 | Putative type-1 protein phosphatase inhibitor 4 OS=Homo sapiens GN=PPP1R2P9 PE=5 SV=1 - [IPP4_HUMAN]         | 14.85 | 1 | 2 | 2 | 2  | 0.91 | 1.08 | 0.92 | 1.09 |      |      |      |      | 202 | 22.6 | 5.12  |
| O75061 | Putative tyrosine-protein phosphatase auxilin OS=Homo sapiens GN=DNAJC6 PE=1 SV=3 - [AUXI_HUMAN]             | 2.19  | 1 | 1 | 1 | 1  | 1.03 | 1.14 | 0.94 | 1.06 |      |      |      |      | 913 | 99.9 | 7.25  |
| Q6UWK7 | Putative uncharacterized protein C10orf99 OS=Homo sapiens GN=C10orf99 PE=2 SV=1 - [CJ099_HUMAN]              | 13.58 | 1 | 1 | 1 | 2  |      |      |      |      | 1.79 | 1.75 | 0.80 | 0.79 | 81  | 9.2  | 10.49 |
| Q8WZ69 | Putative uncharacterized protein C11orf40 OS=Homo sapiens GN=C11orf40 PE=2 SV=1 - [CK040_HUMAN]              | 11.52 | 1 | 1 | 1 | 1  |      |      |      | 1.08 |      |      |      |      | 217 | 24.6 | 7.69  |
| Q52M58 | Putative uncharacterized protein C14orf177 OS=Homo sapiens GN=C14orf177 PE=2 SV=1 - [CN177_HUMAN]            | 15.20 | 1 | 1 | 1 | 1  | 1.27 | 1.26 | 1.23 | 1.23 |      |      |      |      | 125 | 13.9 | 8.91  |
| Q8NBB2 | Putative uncharacterized protein C15orf37 OS=Homo sapiens GN=C15orf37 PE=2 SV=1 - [CO037_HUMAN]              | 23.08 | 1 | 1 | 1 | 1  |      |      |      |      | 0.52 | 0.87 |      |      | 130 | 13.9 | 11.82 |
| Q8N910 | Putative uncharacterized protein C15orf56 OS=Homo sapiens GN=C15orf56 PE=2 SV=1 - [CO056_HUMAN]              | 14.29 | 1 | 1 | 1 | 1  | 1.19 | 1.29 | 0.95 | 1.03 |      |      |      |      | 161 | 17.0 | 11.88 |
| Q6ZSH3 | Putative uncharacterized protein C16orf85 OS=Homo sapiens GN=C16orf85 PE=2 SV=1 - [CP085_HUMAN]              | 4.76  | 1 | 1 | 1 | 1  |      |      |      |      | 0.99 | 0.79 | 0.74 | 0.59 | 147 | 15.9 | 8.66  |
| Q5JT78 | Putative uncharacterized protein C1orf137 OS=Homo sapiens GN=C1orf137 PE=2 SV=1 - [CA137_HUMAN]              | 6.12  | 1 | 1 | 1 | 2  |      |      |      |      | 0.77 | 0.81 | 0.74 | 0.77 | 98  | 11.0 | 7.72  |
| Q5T0J3 | Putative uncharacterized protein C1orf220 OS=Homo sapiens GN=C1orf220 PE=2 SV=1 - [CA220_HUMAN]              | 6.72  | 1 | 1 | 1 | 1  |      |      |      |      | 0.74 | 0.79 | 0.73 | 0.78 | 134 | 15.1 | 9.86  |
| Q9NV39 | Putative uncharacterized protein C22orf26 OS=Homo sapiens GN=C22orf26 PE=2 SV=1 - [CV026_HUMAN]              | 10.14 | 1 | 1 | 1 | 1  | 1.29 | 1.28 | 1.31 | 1.31 |      |      |      |      | 138 | 14.7 | 12.41 |
| Q96BT1 | Putative uncharacterized protein C3orf49 OS=Homo sapiens GN=C3orf49 PE=2 SV=1 - [CC049_HUMAN]                | 2.05  | 1 | 1 | 1 | 1  | 1.13 | 1.14 | 1.17 | 1.20 |      |      |      |      | 292 | 33.4 | 10.18 |
| Q5JQF7 | Putative uncharacterized protein C6orf100 OS=Homo sapiens GN=C6orf100 PE=4 SV=2 - [CF100_HUMAN]              | 32.26 | 1 | 1 | 1 | 1  |      |      |      |      | 0.32 | 0.71 | 0.49 | 1.08 | 62  | 7.3  | 11.22 |
| Q5TEZ4 | Putative uncharacterized protein C6orf164 OS=Homo sapiens GN=C6orf164 PE=2 SV=2 - [CF164_HUMAN]              | 7.89  | 1 | 1 | 1 | 2  | 0.76 | 0.54 | 0.76 | 0.54 |      |      |      |      | 76  | 8.4  | 8.60  |
| Q5T699 | Putative uncharacterized protein C6orf183 OS=Homo sapiens GN=C6orf183 PE=5 SV=2 - [CF183_HUMAN]              | 2.53  | 1 | 1 | 1 | 1  |      |      |      |      | 0.26 | 0.24 | 0.51 | 0.47 | 396 | 45.7 | 5.62  |
| Q9BWJ2 | Putative uncharacterized protein C8orf51 OS=Homo sapiens GN=C8orf51 PE=5 SV=1 - [CH051_HUMAN]                | 10.17 | 1 | 1 | 1 | 1  |      |      |      |      | 0.71 | 0.88 | 0.84 | 1.05 | 59  | 6.7  | 6.51  |
| Q9HA58 | Putative uncharacterized protein C8orf60 OS=Homo sapiens GN=C8orf60 PE=5 SV=1 - [CH060_HUMAN]                | 21.25 | 1 | 2 | 2 | 2  | 0.93 | 0.40 | 0.92 | 0.39 |      |      |      |      | 160 | 16.9 | 8.22  |
| Q0IIN9 | Putative uncharacterized protein C8orf77 OS=Homo sapiens GN=C8orf77 PE=5 SV=1 - [CH077_HUMAN]                | 5.21  | 1 | 1 | 1 | 3  |      |      |      |      | 1.00 | 0.77 | 0.92 | 0.73 | 211 | 22.5 | 8.37  |
| A6NHY6 | Putative uncharacterized protein C9orf118 OS=Homo sapiens GN=C9orf118 PE=4 SV=2 - [CI118_HUMAN]              | 37.68 | 1 | 1 | 1 | 3  | 0.98 | 0.94 |      |      |      |      |      |      | 69  | 7.9  | 8.18  |
| A6PW82 | Putative uncharacterized protein CXorf30 OS=Homo sapiens GN=CXorf30 PE=2 SV=2 - [CX030_HUMAN]                | 1.11  | 1 | 1 | 1 | 1  |      |      |      |      | 0.56 | 1.02 | 0.51 | 0.93 | 633 | 72.0 | 6.09  |
| Q8ND99 | Putative uncharacterized protein DKFZp434G1729 OS=Homo sapiens PE=5 SV=2 - [YS038_HUMAN]                     | 2.82  | 1 | 1 | 1 | 1  |      |      |      |      | 0.58 | 0.69 | 0.80 | 0.95 | 567 | 60.1 | 9.72  |
| Q6XXX2 | Putative uncharacterized protein encoded by LINC00114 OS=Homo sapiens GN=LINC00114 PE=5 SV=1 - [CU024_HUMAN] | 2.86  | 1 | 1 | 1 | 1  |      |      |      |      | 0.71 | 0.35 | 0.48 | 0.24 | 140 | 15.7 | 9.61  |
| Q8N2A0 | Putative uncharacterized protein encoded by LINC00269 OS=Homo sapiens GN=LINC00269 PE=5 SV=1 - [CX062_HUMAN] | 8.05  | 1 | 1 | 1 | 2  |      |      |      |      | 1.40 | 1.25 | 0.93 | 0.83 | 174 | 18.3 | 7.23  |
| Q8N616 | Putative uncharacterized protein encoded by LINC00311 OS=Homo sapiens GN=LINC00311 PE=5 SV=1 - [TM148_HUMAN] | 4.20  | 1 | 1 | 1 | 2  |      |      |      |      | 0.73 | 0.85 | 0.95 | 1.11 | 119 | 12.9 | 7.09  |

|        |                                                                                                                                       |       |   |   |   |    |      |      |      |      |      |      |      |      |     |      |       |
|--------|---------------------------------------------------------------------------------------------------------------------------------------|-------|---|---|---|----|------|------|------|------|------|------|------|------|-----|------|-------|
| Q8IVM7 | Putative uncharacterized protein encoded by LINC00346 OS=Homo sapiens GN=LINC00346 PE=5 SV=1 - [CM029_HUMAN]                          | 12.80 | 1 | 2 | 2 | 6  | 1.24 | 1.01 | 1.26 | 1.04 | 1.02 | 1.13 | 1.00 | 1.10 | 164 | 18.1 | 9.00  |
| Q8WZB0 | Putative uncharacterized protein encoded by LINC00476 OS=Homo sapiens GN=LINC00476 PE=5 SV=1 - [C1130_HUMAN]                          | 11.76 | 1 | 1 | 1 | 1  | 0.80 | 0.62 | 0.70 | 0.55 |      |      |      |      | 136 | 14.7 | 11.93 |
| Q8N0U6 | Putative uncharacterized protein encoded by LINC00518 OS=Homo sapiens GN=LINC00518 PE=2 SV=1 - [CF218_HUMAN]                          | 22.03 | 1 | 1 | 1 | 1  |      |      |      |      | 1.15 | 0.81 |      |      | 118 | 13.4 | 5.10  |
| Q96LP4 | Putative uncharacterized protein FLJ25328 OS=Homo sapiens PE=2 SV=1 - [YS017_HUMAN]                                                   | 4.39  | 1 | 1 | 1 | 1  | 0.97 | 1.35 | 0.85 | 1.18 |      |      |      |      | 205 | 22.0 | 8.50  |
| Q8NA96 | Putative uncharacterized protein FLJ35723 OS=Homo sapiens PE=5 SV=2 - [YE027_HUMAN]                                                   | 30.00 | 1 | 2 | 2 | 2  | 1.07 | 1.17 | 1.09 | 1.20 |      |      |      |      | 180 | 19.6 | 8.59  |
| A4D1N5 | Putative uncharacterized protein FLJ40288 OS=Homo sapiens PE=2 SV=1 - [YG018_HUMAN]                                                   | 4.67  | 1 | 1 | 1 | 1  |      |      |      |      | 0.57 | 1.42 | 0.59 | 1.46 | 150 | 16.7 | 8.06  |
| Q6ZW54 | Putative uncharacterized protein FLJ41591 OS=Homo sapiens PE=2 SV=1 - [YQ046_HUMAN]                                                   | 6.08  | 1 | 1 | 1 | 1  |      |      |      |      | 0.57 | 0.28 | 0.72 | 0.36 | 148 | 15.9 | 9.61  |
| Q6ZVN7 | Putative uncharacterized protein FLJ42280 OS=Homo sapiens PE=2 SV=2 - [YG008_HUMAN]                                                   | 19.53 | 1 | 1 | 1 | 1  | 1.10 | 0.83 | 1.16 | 0.88 |      |      |      |      | 128 | 14.1 | 9.55  |
| Q6ZSV7 | Putative uncharacterized protein FLJ45177 OS=Homo sapiens PE=2 SV=1 - [YF010_HUMAN]                                                   | 19.63 | 1 | 1 | 1 | 1  | 1.01 | 0.92 | 1.00 | 0.93 |      |      |      |      | 163 | 16.9 | 8.41  |
| Q6ZSR3 | Putative uncharacterized protein FLJ45275, mitochondrial OS=Homo sapiens PE=5 SV=1 - [Y0027_HUMAN]                                    | 14.88 | 1 | 1 | 1 | 1  | 0.49 | 0.60 | 0.56 | 0.70 |      |      |      |      | 168 | 17.9 | 8.41  |
| Q6ZRU5 | Putative uncharacterized protein FLJ46089 OS=Homo sapiens PE=5 SV=2 - [YQ032_HUMAN]                                                   | 6.76  | 1 | 1 | 1 | 1  |      |      |      |      | 0.50 | 0.44 | 0.65 | 0.57 | 148 | 16.9 | 9.55  |
| Q5TG08 | Putative uncharacterized protein LOC388900 OS=Homo sapiens PE=1 SV=2 - [YV009_HUMAN]                                                  | 1.70  | 1 | 1 | 1 | 1  |      |      |      |      | 1.16 | 1.44 | 0.58 | 0.72 | 646 | 74.9 | 9.25  |
| Q0VD67 | Putative uncharacterized protein LOC440356 OS=Homo sapiens PE=5 SV=1 - [YP032_HUMAN]                                                  | 7.23  | 1 | 1 | 1 | 1  |      |      |      |      | 1.45 | 1.36 | 1.54 | 1.43 | 83  | 9.0  | 8.31  |
| Q9UI72 | Putative uncharacterized protein PRO0255 OS=Homo sapiens GN=PRO0255 PE=5 SV=1 - [YE014_HUMAN]                                         | 34.78 | 1 | 2 | 2 | 2  | 0.68 | 0.74 | 0.73 | 0.79 |      |      |      |      | 69  | 8.2  | 9.14  |
| Q8N0V1 | Putative uncharacterized protein ZNF295-AS1 OS=Homo sapiens GN=ZNF295-AS1 PE=5 SV=2 - [ZNAS1_HUMAN]                                   | 13.14 | 1 | 1 | 1 | 4  | 0.10 | 0.22 | 0.14 | 0.21 |      |      |      |      | 137 | 15.0 | 8.68  |
| A8MVJ9 | Putative UPF0609 protein C4orf27-like OS=Homo sapiens PE=1 SV=1 - [YI028_HUMAN]                                                       | 2.59  | 1 | 2 | 2 | 14 | 0.73 | 0.63 | 0.71 | 0.62 | 1.11 | 0.99 | 1.01 | 1.00 | 347 | 39.7 | 8.10  |
| A6NJ16 | Putative V-set and immunoglobulin domain-containing-like protein IGHV4OR15-8 OS=Homo sapiens GN=IGHV4OR15-8 PE=5 SV=2 - [IV4F8_HUMAN] | 16.26 | 2 | 3 | 4 | 17 | 1.03 | 1.09 | 1.03 | 1.08 | 1.45 | 1.50 | 1.21 | 1.25 | 123 | 13.6 | 9.60  |
| P0CG00 | Putative zinc finger and SCAN domain-containing protein 5D OS=Homo sapiens GN=ZSCAN5D PE=5 SV=1 - [ZSA5D_HUMAN]                       | 5.84  | 1 | 1 | 1 | 1  |      |      |      |      | 0.98 | 1.06 | 1.01 | 1.10 | 497 | 56.2 | 8.63  |
| B1APH4 | Putative zinc finger protein 487 OS=Homo sapiens GN=ZNF487P PE=5 SV=3 - [ZN487_HUMAN]                                                 | 2.23  | 1 | 1 | 1 | 1  |      |      |      |      | 1.36 | 1.93 | 1.19 | 1.69 | 448 | 51.6 | 7.85  |
| A8MUZ8 | Putative zinc finger protein 705G OS=Homo sapiens GN=ZNF705G PE=2 SV=2 - [Z705G_HUMAN]                                                | 7.33  | 1 | 1 | 1 | 2  | 0.66 | 0.65 | 0.58 | 0.57 |      |      |      |      | 300 | 34.7 | 9.22  |
| A8MSQ6 | Putative zinc finger protein 725 OS=Homo sapiens GN=ZNF725 PE=4 SV=2 - [ZN725_HUMAN]                                                  | 7.25  | 1 | 1 | 1 | 2  | 1.24 | 1.09 | 1.40 | 1.23 |      |      |      |      | 138 | 15.8 | 8.88  |
| Q15940 | Putative zinc finger protein 726P1 OS=Homo sapiens GN=ZNF726P1 PE=5 SV=2 - [ZNF67_HUMAN]                                              | 3.11  | 1 | 1 | 1 | 2  |      |      |      |      | 1.06 | 0.85 | 1.07 | 0.86 | 193 | 23.0 | 9.80  |
| P0C7V5 | Putative zinc finger protein 812 OS=Homo sapiens GN=ZNF812 PE=5 SV=1 - [ZN812_HUMAN]                                                  | 3.74  | 1 | 1 | 1 | 4  | 0.54 | 0.82 | 0.57 | 0.54 |      |      |      |      | 454 | 51.5 | 8.38  |
| Q96N64 | PWWP domain-containing protein 2A OS=Homo sapiens GN=PWWP2A PE=1 SV=2 - [PWP2A_HUMAN]                                                 | 1.06  | 1 | 1 | 1 | 5  |      |      |      |      | 0.80 | 1.12 | 0.84 | 1.17 | 755 | 81.9 | 9.00  |
| Q6NUJ5 | PWWP domain-containing protein 2B OS=Homo sapiens GN=PWWP2B PE=1 SV=3 - [PWP2B_HUMAN]                                                 | 1.36  | 1 | 1 | 1 | 1  |      |      |      |      | 1.57 | 1.66 | 1.04 | 1.10 | 590 | 63.9 | 8.21  |
| Q5H9M0 | PWWP domain-containing protein MUM1L1 OS=Homo sapiens GN=MUM1L1 PE=2 SV=1 - [MUM1L1_HUMAN]                                            | 1.58  | 1 | 1 | 1 | 1  |      |      |      |      | 0.85 | 0.98 | 0.80 | 0.92 | 696 | 79.0 | 4.97  |
| Q8TCD6 | Pyridoxal phosphate phosphatase PHOSPHO2 OS=Homo sapiens GN=PHOSPHO2 PE=1 SV=1 - [PHOP2_HUMAN]                                        | 10.79 | 1 | 1 | 1 | 5  | 1.25 | 0.67 | 1.25 | 0.67 | 0.73 | 0.97 | 0.66 | 0.83 | 241 | 27.8 | 6.79  |

|        |                                                                                                            |       |   |    |    |    |      |      |      |      |      |      |      |      |      |      |       |      |
|--------|------------------------------------------------------------------------------------------------------------|-------|---|----|----|----|------|------|------|------|------|------|------|------|------|------|-------|------|
| Q8WXC3 | Pyrin domain-containing protein 1 OS=Homo sapiens GN=PYDC1 PE=1 SV=1 - [PYDC1_HUMAN]                       | 5.62  | 1 | 1  | 1  | 1  |      |      |      |      |      | 1.11 | 1.71 | 1.10 | 1.70 | 89   | 10.1  | 6.79 |
| O15553 | Pyrin OS=Homo sapiens GN=MEFV PE=1 SV=1 - [MEFV_HUMAN]                                                     | 2.18  | 1 | 1  | 1  | 1  |      |      |      |      |      | 1.46 | 1.51 | 0.73 | 0.76 | 781  | 86.4  | 8.03 |
| Q9NXJ5 | Pyroglutamyl-peptidase 1 OS=Homo sapiens GN=PGPEP1 PE=1 SV=1 - [PGPI_HUMAN]                                | 7.66  | 1 | 1  | 1  | 1  | 0.85 | 0.71 | 0.86 | 0.72 |      |      |      |      |      | 209  | 23.1  | 5.90 |
| Q96C36 | Pyroline-5-carboxylate reductase 2 OS=Homo sapiens GN=PYCR2 PE=1 SV=1 - [P5CR2_HUMAN]                      | 5.31  | 1 | 1  | 1  | 1  | 1.39 | 1.15 | 1.36 | 1.14 |      |      |      |      |      | 320  | 33.6  | 7.77 |
| O00330 | Pyruvate dehydrogenase protein X component, mitochondrial OS=Homo sapiens GN=PDHX PE=1 SV=3 - [ODPX_HUMAN] | 2.79  | 1 | 1  | 1  | 1  | 1.18 | 1.19 | 1.01 | 1.04 |      |      |      |      |      | 501  | 54.1  | 8.66 |
| P14618 | Pyruvate kinase isozymes M1/M2 OS=Homo sapiens GN=PKM2 PE=1 SV=4 - [KPYM_HUMAN]                            | 27.50 | 1 | 10 | 11 | 48 | 0.81 | 0.85 | 0.80 | 0.82 | 0.93 | 0.92 | 1.05 | 1.02 |      | 531  | 57.9  | 7.84 |
| P30613 | Pyruvate kinase isozymes R/L OS=Homo sapiens GN=PKLR PE=1 SV=2 - [KPYR_HUMAN]                              | 6.27  | 1 | 1  | 2  | 5  | 0.99 | 0.84 | 0.90 | 0.78 |      |      |      |      |      | 574  | 61.8  | 7.74 |
| Q210M5 | R-spondin-4 OS=Homo sapiens GN=RSP04 PE=1 SV=2 - [RSP04_HUMAN]                                             | 2.56  | 1 | 1  | 1  | 4  | 0.39 | 0.57 | 0.47 | 0.72 | 0.85 | 1.34 | 0.68 | 1.06 |      | 234  | 26.2  | 9.07 |
| P50395 | Rab GDP dissociation inhibitor beta OS=Homo sapiens GN=GDI2 PE=1 SV=2 - [GDIB_HUMAN]                       | 2.47  | 1 | 1  | 1  | 1  | 0.88 | 0.93 | 0.73 | 0.77 |      |      |      |      |      | 445  | 50.6  | 6.47 |
| Q5R372 | Rab GTPase-activating protein 1-like OS=Homo sapiens GN=RABGAP1L PE=1 SV=1 - [RBG1L_HUMAN]                 | 1.35  | 1 | 1  | 1  | 4  | 0.90 | 0.98 | 0.86 | 0.94 | 1.20 | 1.22 | 1.09 | 1.11 |      | 815  | 92.5  | 5.31 |
| Q15276 | Rab GTPase-binding effector protein 1 OS=Homo sapiens GN=RABEP1 PE=1 SV=2 - [RABE1_HUMAN]                  | 4.18  | 2 | 3  | 4  | 20 | 0.88 | 1.19 | 0.84 | 1.14 | 1.23 | 1.31 | 1.15 | 1.23 |      | 862  | 99.2  | 5.01 |
| Q3YEC7 | Rab-like protein 1 OS=Homo sapiens GN=PARF PE=1 SV=2 - [RBEL1_HUMAN]                                       | 5.21  | 1 | 1  | 1  | 2  | 0.91 | 0.99 | 1.02 | 1.13 |      |      |      |      |      | 729  | 79.5  | 5.22 |
| Q6WKZ4 | Rab11 family-interacting protein 1 OS=Homo sapiens GN=RAB11FIP1 PE=1 SV=2 - [RFIP1_HUMAN]                  | 2.96  | 2 | 3  | 3  | 3  | 0.37 | 0.35 | 0.58 | 0.55 |      |      |      |      |      | 1283 | 137.1 | 5.47 |
| Q86YS3 | Rab11 family-interacting protein 4 OS=Homo sapiens GN=RAB11FIP4 PE=1 SV=1 - [RFIP4_HUMAN]                  | 1.57  | 1 | 1  | 1  | 1  | 1.80 | 1.71 | 2.09 | 1.99 |      |      |      |      |      | 637  | 71.9  | 4.87 |
| P31751 | RAC-beta serine/threonine-protein kinase OS=Homo sapiens GN=AKT2 PE=1 SV=2 - [AKT2_HUMAN]                  | 4.78  | 1 | 2  | 2  | 2  | 0.56 | 0.91 | 0.60 | 0.99 |      |      |      |      |      | 481  | 55.7  | 6.37 |
| Q6NUQ1 | RAD50-interacting protein 1 OS=Homo sapiens GN=RINT1 PE=1 SV=1 - [RINT1_HUMAN]                             | 2.02  | 1 | 1  | 1  | 2  | 0.67 | 0.67 | 0.62 | 0.63 |      |      |      |      |      | 792  | 90.6  | 5.45 |
| Q52LD8 | Raftin-2 OS=Homo sapiens GN=RFTN2 PE=1 SV=3 - [RFTN2_HUMAN]                                                | 4.19  | 1 | 1  | 1  | 2  | 1.68 | 1.71 | 1.60 | 1.64 |      |      |      |      |      | 501  | 55.9  | 5.83 |
| Q2PPJ7 | Ral GTPase-activating protein subunit alpha-2 OS=Homo sapiens GN=RALGAPA2 PE=1 SV=2 - [RGPA2_HUMAN]        | 2.51  | 1 | 3  | 3  | 5  | 0.62 | 0.58 | 0.63 | 0.60 | 0.81 | 0.64 | 0.89 | 0.63 |      | 1873 | 210.6 | 6.07 |
| Q12967 | Ral guanine nucleotide dissociation stimulator OS=Homo sapiens GN=RALGDS PE=1 SV=2 - [GNDS_HUMAN]          | 1.75  | 1 | 1  | 1  | 1  |      |      |      |      | 1.01 | 0.82 | 1.08 | 0.88 |      | 914  | 100.5 | 5.72 |
| Q96D71 | RalBP1-associated Eps domain-containing protein 1 OS=Homo sapiens GN=REPS1 PE=1 SV=3 - [REPS1_HUMAN]       | 2.01  | 1 | 1  | 1  | 1  | 0.20 | 0.07 | 0.84 | 0.28 |      |      |      |      |      | 796  | 86.6  | 5.69 |
| P46060 | Ran GTPase-activating protein 1 OS=Homo sapiens GN=RANGAP1 PE=1 SV=1 - [RAGP1_HUMAN]                       | 2.73  | 1 | 1  | 1  | 2  | 1.07 | 0.65 | 0.74 | 0.45 |      |      |      |      |      | 587  | 63.5  | 4.68 |
| Q9H2T7 | Ran-binding protein 17 OS=Homo sapiens GN=RANBP17 PE=2 SV=1 - [RBP17_HUMAN]                                | 1.01  | 1 | 1  | 1  | 3  | 1.29 | 1.20 | 1.38 | 1.35 |      |      |      |      |      | 1088 | 124.3 | 6.44 |
| O60518 | Ran-binding protein 6 OS=Homo sapiens GN=RANBP6 PE=1 SV=2 - [RNBP6_HUMAN]                                  | 2.17  | 1 | 1  | 1  | 3  | 0.54 | 0.33 | 0.67 | 0.42 |      |      |      |      |      | 1105 | 124.6 | 5.01 |
| P43487 | Ran-specific GTPase-activating protein OS=Homo sapiens GN=RANBP1 PE=1 SV=1 - [RANG_HUMAN]                  | 5.47  | 1 | 1  | 1  | 2  |      |      |      |      | 1.90 | 1.60 | 1.97 | 1.65 |      | 201  | 23.3  | 5.29 |
| A6NKT7 | RanBP2-like and GRIP domain-containing protein 3 OS=Homo sapiens GN=RGPD3 PE=2 SV=2 - [RGPD3_HUMAN]        | 1.76  | 6 | 1  | 3  | 3  |      |      |      |      | 0.82 | 0.67 | 0.84 | 0.69 |      | 1758 | 197.4 | 6.33 |
| Q13905 | Rap guanine nucleotide exchange factor 1 OS=Homo sapiens GN=RAPGEF1 PE=1 SV=3 - [RPGF1_HUMAN]              | 0.93  | 1 | 1  | 1  | 2  |      |      |      |      | 0.95 | 1.17 | 0.67 | 0.83 |      | 1077 | 120.5 | 5.92 |
| O95398 | Rap guanine nucleotide exchange factor 3 OS=Homo sapiens GN=RAPGEF3 PE=1 SV=6 - [RPGF3_HUMAN]              | 3.03  | 1 | 1  | 1  | 1  | 0.58 | 0.66 | 0.60 | 0.68 |      |      |      |      |      | 923  | 103.7 | 7.56 |

|        |                                                                                                         |       |   |   |   |    |      |      |      |      |      |      |      |      |      |       |      |      |       |      |
|--------|---------------------------------------------------------------------------------------------------------|-------|---|---|---|----|------|------|------|------|------|------|------|------|------|-------|------|------|-------|------|
| Q8TEU7 | Rap guanine nucleotide exchange factor 6 OS=Homo sapiens GN=RAPGEF6 PE=1 SV=2 - [RPGF6_HUMAN]           | 3.87  | 2 | 4 | 5 | 12 |      |      |      |      |      |      |      | 1.00 | 0.74 | 1.01  | 0.71 | 1601 | 179.3 | 6.40 |
| Q6R327 | Rapamycin-insensitive companion of mTOR OS=Homo sapiens GN=RICTOR PE=1 SV=1 - [RICTR_HUMAN]             | 3.40  | 1 | 3 | 3 | 3  | 0.91 | 0.84 | 0.88 | 0.82 |      |      |      |      |      |       |      | 1708 | 192.1 | 7.47 |
| Q13671 | Ras and Rab interactor 1 OS=Homo sapiens GN=RIN1 PE=1 SV=4 - [RIN1_HUMAN]                               | 2.55  | 1 | 1 | 1 | 1  | 1.31 | 1.30 | 0.82 | 0.82 |      |      |      |      |      |       |      | 783  | 84.0  | 8.02 |
| P50749 | Ras association domain-containing protein 2 OS=Homo sapiens GN=RASSF2 PE=1 SV=1 - [RASf2_HUMAN]         | 3.99  | 1 | 1 | 1 | 3  | 1.18 | 1.49 | 1.02 | 1.28 |      |      |      |      |      |       |      | 326  | 37.8  | 8.84 |
| Q6ZTQ3 | Ras association domain-containing protein 6 OS=Homo sapiens GN=RASSF6 PE=1 SV=1 - [RASf6_HUMAN]         | 2.17  | 1 | 1 | 1 | 1  |      |      |      |      | 0.98 | 0.28 | 0.94 | 0.26 | 369  | 43.4  | 8.78 |      |       |      |
| Q02833 | Ras association domain-containing protein 7 OS=Homo sapiens GN=RASSF7 PE=2 SV=1 - [RASf7_HUMAN]         | 2.68  | 1 | 1 | 1 | 2  |      |      |      |      | 0.99 | 1.21 | 0.88 | 1.08 | 373  | 39.9  | 5.62 |      |       |      |
| P20936 | Ras GTPase-activating protein 1 OS=Homo sapiens GN=RASA1 PE=1 SV=1 - [RASA1_HUMAN]                      | 0.76  | 1 | 1 | 1 | 1  |      |      |      |      | 1.65 | 1.27 | 1.50 | 1.16 | 1047 | 116.3 | 6.54 |      |       |      |
| Q14644 | Ras GTPase-activating protein 3 OS=Homo sapiens GN=RASA3 PE=1 SV=3 - [RASA3_HUMAN]                      | 2.04  | 1 | 1 | 1 | 1  |      |      |      |      | 1.60 | 1.50 | 1.51 | 1.41 | 834  | 95.6  | 7.15 |      |       |      |
| Q9UJF2 | Ras GTPase-activating protein nGAP OS=Homo sapiens GN=RASAL2 PE=1 SV=2 - [NGAP_HUMAN]                   | 1.23  | 1 | 1 | 1 | 1  |      |      |      |      | 0.20 | 1.87 | 0.46 | 4.35 | 1139 | 128.5 | 8.24 |      |       |      |
| Q13576 | Ras GTPase-activating-like protein IQGAP2 OS=Homo sapiens GN=IQGAP2 PE=1 SV=4 - [IQGA2_HUMAN]           | 2.41  | 1 | 3 | 3 | 3  | 0.39 | 0.39 | 0.51 | 0.50 | 0.46 | 0.40 | 1.05 | 0.78 | 1575 | 180.5 | 5.64 |      |       |      |
| Q86V13 | Ras GTPase-activating-like protein IQGAP3 OS=Homo sapiens GN=IQGAP3 PE=1 SV=2 - [IQGA3_HUMAN]           | 3.19  | 1 | 3 | 4 | 23 | 0.73 | 0.84 | 0.75 | 0.83 | 0.62 | 0.70 | 0.56 | 0.63 | 1631 | 184.6 | 7.65 |      |       |      |
| Q7LDG7 | RAS guanyl-releasing protein 2 OS=Homo sapiens GN=RASGRP2 PE=1 SV=1 - [GRP2_HUMAN]                      | 9.03  | 1 | 3 | 3 | 8  | 0.72 | 0.38 | 0.74 | 0.39 | 1.61 | 1.59 | 1.64 | 1.42 | 609  | 69.2  | 7.80 |      |       |      |
| Q86YV0 | RAS protein activator like-3 OS=Homo sapiens GN=RASAL3 PE=1 SV=2 - [RASL3_HUMAN]                        | 0.89  | 1 | 1 | 1 | 2  | 1.41 | 0.91 | 1.44 | 0.93 | 1.24 | 1.08 | 1.21 | 1.06 | 1011 | 111.8 | 8.75 |      |       |      |
| Q15404 | Ras suppressor protein 1 OS=Homo sapiens GN=RSU1 PE=1 SV=3 - [RSU1_HUMAN]                               | 29.60 | 1 | 5 | 5 | 9  | 0.60 | 0.54 | 0.62 | 0.60 |      |      |      |      | 277  | 31.5  | 8.65 |      |       |      |
| Q96JH8 | Ras-associating and dilute domain-containing protein OS=Homo sapiens GN=RADIL PE=1 SV=5 - [RADIL_HUMAN] | 3.07  | 1 | 1 | 1 | 1  | 1.22 | 1.17 | 1.48 | 1.42 |      |      |      |      | 1075 | 117.4 | 7.09 |      |       |      |
| P15153 | Ras-related C3 botulinum toxin substrate 2 OS=Homo sapiens GN=RAC2 PE=1 SV=1 - [RAC2_HUMAN]             | 20.83 | 6 | 3 | 4 | 7  | 1.12 | 0.84 | 1.08 | 0.88 | 0.96 | 0.96 | 0.93 | 0.93 | 192  | 21.4  | 7.61 |      |       |      |
| Q9HB90 | Ras-related GTP-binding protein C OS=Homo sapiens GN=RRAGC PE=1 SV=1 - [RRAGC_HUMAN]                    | 3.51  | 2 | 1 | 1 | 1  |      |      |      |      | 1.41 | 1.16 | 1.42 | 1.17 | 399  | 44.2  | 5.10 |      |       |      |
| P61026 | Ras-related protein Rab-10 OS=Homo sapiens GN=RAB10 PE=1 SV=1 - [RAB10_HUMAN]                           | 14.00 | 2 | 1 | 3 | 6  | 0.88 | 0.94 | 0.78 | 0.85 |      |      |      |      | 200  | 22.5  | 8.38 |      |       |      |
| P62491 | Ras-related protein Rab-11A OS=Homo sapiens GN=RAB11A PE=1 SV=3 - [RB11A_HUMAN]                         | 20.37 | 2 | 4 | 4 | 13 | 0.99 | 0.90 | 0.92 | 0.85 | 1.52 | 1.51 | 1.50 | 1.41 | 216  | 24.4  | 6.57 |      |       |      |
| P51153 | Ras-related protein Rab-13 OS=Homo sapiens GN=RAB13 PE=1 SV=1 - [RAB13_HUMAN]                           | 17.73 | 2 | 2 | 3 | 6  |      |      |      |      | 0.91 | 0.86 | 0.93 | 1.00 | 203  | 22.8  | 9.19 |      |       |      |
| P61106 | Ras-related protein Rab-14 OS=Homo sapiens GN=RAB14 PE=1 SV=4 - [RAB14_HUMAN]                           | 20.93 | 1 | 3 | 3 | 19 | 0.84 | 0.85 | 0.86 | 0.88 | 1.46 | 1.47 | 1.40 | 1.54 | 215  | 23.9  | 6.21 |      |       |      |
| Q9NP72 | Ras-related protein Rab-18 OS=Homo sapiens GN=RAB18 PE=1 SV=1 - [RAB18_HUMAN]                           | 6.80  | 1 | 1 | 2 | 4  |      |      |      |      | 5.08 | 5.01 | 4.72 | 4.65 | 206  | 23.0  | 5.24 |      |       |      |
| A4D1S5 | Ras-related protein Rab-19 OS=Homo sapiens GN=RAB19 PE=2 SV=2 - [RAB19_HUMAN]                           | 5.07  | 1 | 1 | 1 | 1  | 1.23 | 1.13 | 1.19 | 1.10 |      |      |      |      | 217  | 24.4  | 6.52 |      |       |      |
| Q9H0U4 | Ras-related protein Rab-1B OS=Homo sapiens GN=RAB1B PE=1 SV=1 - [RAB1B_HUMAN]                           | 33.33 | 4 | 4 | 5 | 16 | 0.90 | 0.74 | 0.84 | 0.75 | 1.14 | 1.05 | 1.27 | 1.10 | 201  | 22.2  | 5.73 |      |       |      |
| Q9NX57 | Ras-related protein Rab-20 OS=Homo sapiens GN=RAB20 PE=1 SV=1 - [RAB20_HUMAN]                           | 5.13  | 1 | 1 | 1 | 1  | 0.57 | 0.61 | 0.90 | 0.98 |      |      |      |      | 234  | 26.3  | 6.55 |      |       |      |
| Q9UL25 | Ras-related protein Rab-21 OS=Homo sapiens GN=RAB21 PE=1 SV=3 - [RAB21_HUMAN]                           | 4.89  | 1 | 1 | 1 | 6  | 0.78 | 0.82 | 0.93 | 0.98 | 1.00 | 0.95 | 1.16 | 1.10 | 225  | 24.3  | 7.94 |      |       |      |
| O00194 | Ras-related protein Rab-27B OS=Homo sapiens GN=RAB27B PE=1 SV=4 - [RB27B_HUMAN]                         | 27.06 | 2 | 5 | 5 | 60 | 0.83 | 0.93 | 0.60 | 0.62 | 1.77 | 1.65 | 1.48 | 1.45 | 218  | 24.6  | 5.52 |      |       |      |

|        |                                                                                                               |       |   |   |   |    |      |      |      |      |      |      |      |      |      |       |      |      |       |      |
|--------|---------------------------------------------------------------------------------------------------------------|-------|---|---|---|----|------|------|------|------|------|------|------|------|------|-------|------|------|-------|------|
| P61019 | Ras-related protein Rab-2A OS=Homo sapiens GN=RAB2A PE=1 SV=1 - [RAB2A_HUMAN]                                 | 7.55  | 1 | 1 | 1 | 1  |      |      |      |      |      |      |      | 1.17 | 1.17 | 1.08  | 1.08 | 212  | 23.5  | 6.54 |
| Q9BZG1 | Ras-related protein Rab-34 OS=Homo sapiens GN=RAB34 PE=1 SV=1 - [RAB34_HUMAN]                                 | 2.70  | 1 | 1 | 1 | 1  |      |      |      |      |      |      |      | 0.75 | 0.67 | 0.88  | 0.78 | 259  | 29.0  | 7.88 |
| Q15286 | Ras-related protein Rab-35 OS=Homo sapiens GN=RAB35 PE=1 SV=1 - [RAB35_HUMAN]                                 | 18.91 | 2 | 1 | 3 | 6  |      |      |      |      |      |      |      | 0.83 | 0.86 | 0.97  | 1.01 | 201  | 23.0  | 8.29 |
| P20336 | Ras-related protein Rab-3A OS=Homo sapiens GN=RAB3A PE=1 SV=1 - [RAB3A_HUMAN]                                 | 15.91 | 2 | 2 | 2 | 2  | 0.93 | 0.84 | 1.01 | 0.91 |      |      |      |      |      |       |      | 220  | 25.0  | 5.03 |
| Q7Z6P3 | Ras-related protein Rab-44 OS=Homo sapiens GN=RAB44 PE=3 SV=3 - [RAB44_HUMAN]                                 | 2.35  | 1 | 1 | 1 | 1  |      |      |      |      |      |      |      | 0.70 | 1.05 | 0.72  | 1.08 | 723  | 77.6  | 4.92 |
| P20339 | Ras-related protein Rab-5A OS=Homo sapiens GN=RAB5A PE=1 SV=2 - [RAB5A_HUMAN]                                 | 11.63 | 2 | 1 | 2 | 16 | 1.00 | 1.18 | 0.88 | 1.06 | 0.83 | 0.90 | 0.74 | 0.81 | 215  | 23.6  | 8.15 |      |       |      |
| P61020 | Ras-related protein Rab-5B OS=Homo sapiens GN=RAB5B PE=1 SV=1 - [RAB5B_HUMAN]                                 | 12.09 | 2 | 1 | 2 | 5  |      |      |      |      |      |      |      | 0.91 | 215  | 23.7  | 8.13 |      |       |      |
| P51148 | Ras-related protein Rab-5C OS=Homo sapiens GN=RAB5C PE=1 SV=2 - [RAB5C_HUMAN]                                 | 14.35 | 1 | 2 | 2 | 3  | 0.86 | 0.72 | 0.93 | 0.78 |      |      |      |      | 216  | 23.5  | 8.41 |      |       |      |
| P51149 | Ras-related protein Rab-7a OS=Homo sapiens GN=RAB7A PE=1 SV=1 - [RAB7A_HUMAN]                                 | 35.27 | 1 | 6 | 6 | 14 | 0.94 | 0.93 | 0.93 | 0.93 | 1.09 | 1.11 | 1.10 | 1.09 | 207  | 23.5  | 6.70 |      |       |      |
| P61006 | Ras-related protein Rab-8A OS=Homo sapiens GN=RAB8A PE=1 SV=1 - [RAB8A_HUMAN]                                 | 14.98 | 2 | 1 | 3 | 10 | 0.68 | 0.63 | 0.74 | 0.70 | 1.06 | 1.19 | 0.97 | 1.09 | 207  | 23.7  | 9.07 |      |       |      |
| Q92930 | Ras-related protein Rab-8B OS=Homo sapiens GN=RAB8B PE=1 SV=2 - [RAB8B_HUMAN]                                 | 21.74 | 2 | 2 | 4 | 7  | 0.79 | 0.86 | 0.81 | 0.88 | 1.16 | 0.85 | 1.15 | 0.84 | 207  | 23.6  | 9.07 |      |       |      |
| Q9NP90 | Ras-related protein Rab-9B OS=Homo sapiens GN=RAB9B PE=1 SV=1 - [RAB9B_HUMAN]                                 | 12.44 | 1 | 1 | 1 | 2  | 1.02 | 1.00 | 1.03 | 1.02 | 0.73 | 0.85 | 0.62 | 0.72 | 201  | 22.7  | 4.87 |      |       |      |
| P61224 | Ras-related protein Rap-1b OS=Homo sapiens GN=RAP1B PE=1 SV=1 - [RAP1B_HUMAN]                                 | 63.59 | 3 | 8 | 8 | 46 | 0.82 | 0.71 | 0.93 | 0.78 | 0.86 | 0.87 | 1.00 | 0.86 | 184  | 20.8  | 5.78 |      |       |      |
| P10114 | Ras-related protein Rap-2a OS=Homo sapiens GN=RAP2A PE=1 SV=1 - [RAP2A_HUMAN]                                 | 8.74  | 1 | 1 | 1 | 1  |      |      |      |      |      |      |      | 0.54 | 0.81 | 0.48  | 0.71 | 183  | 20.6  | 4.82 |
| Q86X27 | Ras-specific guanine nucleotide-releasing factor RalGPS2 OS=Homo sapiens GN=RALGPS2 PE=1 SV=1 - [RGPS2_HUMAN] | 3.43  | 1 | 1 | 1 | 1  |      |      |      |      |      |      |      | 0.68 | 0.35 | 0.59  | 0.31 | 583  | 65.1  | 8.73 |
| O95294 | RasGAP-activating-like protein 1 OS=Homo sapiens GN=RASAL1 PE=1 SV=3 - [RASL1_HUMAN]                          | 1.24  | 1 | 1 | 1 | 2  |      |      |      |      |      |      |      | 0.59 | 0.77 | 0.62  | 0.81 | 804  | 90.0  | 6.51 |
| Q8TDY2 | RB1-inducible coiled-coil protein 1 OS=Homo sapiens GN=RB1CC1 PE=1 SV=3 - [RBCC1_HUMAN]                       | 3.26  | 4 | 3 | 4 | 6  | 1.37 | 1.00 | 1.56 | 1.15 | 0.95 | 0.93 | 0.96 | 0.94 | 1594 | 183.0 | 5.41 |      |       |      |
| Q9BRK0 | Receptor expression-enhancing protein 2 OS=Homo sapiens GN=REEP2 PE=2 SV=2 - [REEP2_HUMAN]                    | 8.33  | 1 | 1 | 1 | 1  |      |      |      |      |      |      |      | 1.05 | 1.15 | 0.96  | 1.05 | 252  | 28.2  | 9.54 |
| Q00765 | Receptor expression-enhancing protein 5 OS=Homo sapiens GN=REEP5 PE=1 SV=3 - [REEP5_HUMAN]                    | 11.11 | 1 | 1 | 1 | 1  |      |      |      |      |      |      |      | 0.91 | 0.61 | 1.33  | 0.89 | 189  | 21.5  | 8.10 |
| P21860 | Receptor tyrosine-protein kinase erbB-3 OS=Homo sapiens GN=ERBB3 PE=1 SV=1 - [ERBB3_HUMAN]                    | 1.64  | 1 | 1 | 1 | 1  | 0.78 | 1.08 | 0.94 | 1.30 |      |      |      |      | 1342 | 148.0 | 6.55 |      |       |      |
| Q15303 | Receptor tyrosine-protein kinase erbB-4 OS=Homo sapiens GN=ERBB4 PE=1 SV=1 - [ERBB4_HUMAN]                    | 1.30  | 1 | 2 | 2 | 2  |      |      |      |      |      |      |      | 0.98 | 0.70 | 0.93  | 0.66 | 1308 | 146.7 | 6.39 |
| Q13546 | Receptor-interacting serine/threonine-protein kinase 1 OS=Homo sapiens GN=RIPK1 PE=1 SV=3 - [RIPK1_HUMAN]     | 2.24  | 1 | 1 | 1 | 3  | 1.05 | 0.83 | 1.10 | 0.69 |      |      |      |      | 671  | 75.9  | 6.33 |      |       |      |
| P57078 | Receptor-interacting serine/threonine-protein kinase 4 OS=Homo sapiens GN=RIPK4 PE=1 SV=1 - [RIPK4_HUMAN]     | 2.76  | 1 | 1 | 1 | 1  |      |      |      |      |      |      |      | 1.42 | 1.52 | 1.04  | 1.11 | 832  | 91.6  | 7.17 |
| P23467 | Receptor-type tyrosine-protein phosphatase beta OS=Homo sapiens GN=PTPRB PE=1 SV=3 - [PTPRB_HUMAN]            | 1.30  | 1 | 1 | 1 | 1  |      |      |      |      |      |      |      | 1.55 | 1.06 | 1.86  | 1.26 | 1997 | 224.2 | 7.61 |
| P23468 | Receptor-type tyrosine-protein phosphatase delta OS=Homo sapiens GN=PTPRD PE=1 SV=2 - [PTPRD_HUMAN]           | 1.31  | 1 | 2 | 2 | 3  | 1.10 | 1.04 | 1.22 | 1.16 | 0.74 | 0.80 | 0.73 | 0.78 | 1912 | 214.6 | 6.57 |      |       |      |
| P23469 | Receptor-type tyrosine-protein phosphatase epsilon OS=Homo sapiens GN=PTPRE PE=1 SV=1 - [PTPRE_HUMAN]         | 1.57  | 1 | 1 | 1 | 1  | 0.89 | 0.94 | 0.94 | 1.00 |      |      |      |      | 700  | 80.6  | 7.02 |      |       |      |
| Q12913 | Receptor-type tyrosine-protein phosphatase eta OS=Homo sapiens GN=PTPRJ PE=1 SV=3 - [PTPRJ_HUMAN]             | 8.45  | 1 | 9 | 9 | 29 | 0.95 | 0.98 | 0.98 | 0.92 | 0.95 | 0.94 | 0.98 | 0.97 | 1337 | 145.9 | 5.58 |      |       |      |



|        |                                                                                                                    |       |   |   |   |    |      |      |      |      |      |      |      |      |      |       |      |
|--------|--------------------------------------------------------------------------------------------------------------------|-------|---|---|---|----|------|------|------|------|------|------|------|------|------|-------|------|
| P10586 | Receptor-type tyrosine-protein phosphatase F OS=Homo sapiens GN=PTPRF PE=1 SV=2 - [PTPRF_HUMAN]                    | 5.09  | 1 | 8 | 8 | 16 | 0.98 | 1.06 | 0.93 | 1.01 | 0.99 | 1.03 | 0.95 | 1.00 | 1907 | 212.7 | 6.30 |
| P23470 | Receptor-type tyrosine-protein phosphatase gamma OS=Homo sapiens GN=PTPRG PE=1 SV=4 - [PTPRG_HUMAN]                | 4.71  | 1 | 5 | 5 | 11 | 0.88 | 0.88 | 0.78 | 0.80 | 1.29 | 1.27 | 1.35 | 1.34 | 1445 | 161.9 | 6.42 |
| P28827 | Receptor-type tyrosine-protein phosphatase mu OS=Homo sapiens GN=PTPRM PE=1 SV=2 - [PTPRM_HUMAN]                   | 1.10  | 1 | 2 | 2 | 3  | 0.87 | 0.92 | 0.88 | 0.93 | 0.93 | 0.97 | 1.01 | 1.04 | 1452 | 163.6 | 6.65 |
| Q92932 | Receptor-type tyrosine-protein phosphatase N2 OS=Homo sapiens GN=PTPRN2 PE=1 SV=2 - [PTPR2_HUMAN]                  | 6.40  | 1 | 2 | 2 | 6  | 0.95 | 0.95 | 0.67 | 0.71 |      |      |      |      | 1015 | 111.2 | 5.83 |
| Q13332 | Receptor-type tyrosine-protein phosphatase S OS=Homo sapiens GN=PTPRS PE=1 SV=3 - [PTPRS_HUMAN]                    | 5.34  | 1 | 6 | 6 | 13 | 1.20 | 1.15 | 1.13 | 1.11 |      |      |      |      | 1948 | 216.9 | 6.46 |
| O14522 | Receptor-type tyrosine-protein phosphatase T OS=Homo sapiens GN=PTPRT PE=1 SV=6 - [PTPRT_HUMAN]                    | 1.60  | 1 | 1 | 1 | 3  |      |      |      |      | 0.98 | 1.31 | 1.28 | 1.29 | 1441 | 162.0 | 6.89 |
| Q92729 | Receptor-type tyrosine-protein phosphatase U OS=Homo sapiens GN=PTPRU PE=1 SV=2 - [PTPRU_HUMAN]                    | 1.73  | 1 | 1 | 1 | 1  |      |      |      |      | 0.84 | 1.06 | 0.42 | 0.53 | 1446 | 162.3 | 6.92 |
| Q9UBG7 | Recombining binding protein suppressor of hairless-like protein OS=Homo sapiens GN=RBPJL PE=1 SV=3 - [RBPJL_HUMAN] | 1.74  | 1 | 1 | 1 | 2  |      |      |      |      | 1.18 | 0.99 | 0.98 | 0.82 | 517  | 56.7  | 7.72 |
| Q9BRX8 | Redox-regulatory protein FAM213A OS=Homo sapiens GN=FAM213A PE=1 SV=3 - [F213A_HUMAN]                              | 3.06  | 1 | 1 | 1 | 2  | 0.18 | 0.33 | 0.22 | 0.41 |      |      |      |      | 229  | 25.7  | 8.84 |
| P78509 | Reelin OS=Homo sapiens GN=RELN PE=1 SV=3 - [RELN_HUMAN]                                                            | 2.54  | 1 | 5 | 6 | 9  | 0.99 | 0.94 | 1.12 | 0.99 |      |      |      |      | 3460 | 388.1 | 5.88 |
| Q86UR5 | Regulating synaptic membrane exocytosis protein 1 OS=Homo sapiens GN=RIMS1 PE=1 SV=1 - [RIMS1_HUMAN]               | 2.78  | 1 | 3 | 3 | 5  | 0.85 | 0.98 | 0.63 | 0.80 | 3.48 | 3.67 | 3.25 | 3.42 | 1692 | 189.0 | 9.66 |
| Q9NQG5 | Regulation of nuclear pre-mRNA domain-containing protein 1B OS=Homo sapiens GN=RPRD1B PE=1 SV=1 - [RPR1B_HUMAN]    | 2.45  | 1 | 1 | 1 | 1  | 0.77 | 0.82 | 0.76 | 0.82 |      |      |      |      | 326  | 36.9  | 5.97 |
| O43665 | Regulator of G-protein signaling 10 OS=Homo sapiens GN=RGS10 PE=1 SV=2 - [RGS10_HUMAN]                             | 26.01 | 1 | 3 | 4 | 8  |      |      |      |      | 1.06 | 1.12 | 1.05 | 1.11 | 173  | 20.2  | 5.49 |
| O14924 | Regulator of G-protein signaling 12 OS=Homo sapiens GN=RGS12 PE=1 SV=1 - [RGS12_HUMAN]                             | 2.63  | 1 | 3 | 3 | 3  |      |      |      |      | 0.94 | 0.70 | 0.84 | 0.62 | 1447 | 156.3 | 7.44 |
| P41220 | Regulator of G-protein signaling 2 OS=Homo sapiens GN=RGS2 PE=1 SV=1 - [RGS2_HUMAN]                                | 5.21  | 1 | 1 | 1 | 2  |      |      |      |      | 1.28 | 1.22 | 1.93 | 1.84 | 211  | 24.4  | 8.91 |
| Q8NE09 | Regulator of G-protein signaling 22 OS=Homo sapiens GN=RGS22 PE=2 SV=3 - [RGS22_HUMAN]                             | 0.95  | 1 | 1 | 1 | 2  |      |      |      |      | 1.39 | 1.21 | 1.55 | 1.35 | 1264 | 147.1 | 7.90 |
| P49796 | Regulator of G-protein signaling 3 OS=Homo sapiens GN=RGS3 PE=1 SV=2 - [RGS3_HUMAN]                                | 1.84  | 1 | 2 | 2 | 2  | 1.33 | 1.37 | 1.25 | 1.29 | 0.86 | 0.97 | 0.98 | 1.10 | 1198 | 132.3 | 6.28 |
| P49798 | Regulator of G-protein signaling 4 OS=Homo sapiens GN=RGS4 PE=1 SV=1 - [RGS4_HUMAN]                                | 7.80  | 1 | 1 | 1 | 1  |      |      |      |      | 1.05 | 0.93 | 1.21 | 1.06 | 205  | 23.2  | 8.37 |
| P49802 | Regulator of G-protein signaling 7 OS=Homo sapiens GN=RGS7 PE=1 SV=3 - [RGS7_HUMAN]                                | 2.02  | 1 | 1 | 1 | 1  | 0.57 | 0.69 | 0.63 | 0.76 |      |      |      |      | 495  | 57.6  | 8.21 |
| Q6MZT1 | Regulator of G-protein signaling 7-binding protein OS=Homo sapiens GN=RGS7BP PE=2 SV=3 - [R7BP_HUMAN]              | 7.00  | 1 | 1 | 1 | 1  |      |      |      |      | 0.77 | 0.88 | 0.99 | 1.12 | 257  | 28.9  | 8.46 |
| A5PLK6 | Regulator of G-protein signaling protein-like OS=Homo sapiens GN=RGS1 PE=2 SV=1 - [RGS1_HUMAN]                     | 4.37  | 1 | 3 | 3 | 6  | 1.05 | 0.96 | 1.16 | 1.17 | 0.93 | 0.98 | 1.19 | 1.26 | 1076 | 125.6 | 9.01 |
| Q92900 | Regulator of nonsense transcripts 1 OS=Homo sapiens GN=UPF1 PE=1 SV=2 - [RENT1_HUMAN]                              | 3.54  | 1 | 2 | 2 | 2  | 4.16 | 2.23 | 0.97 | 0.52 | 1.33 | 1.21 | 1.31 | 1.19 | 1129 | 124.3 | 6.61 |
| Q92681 | Regulatory solute carrier protein family 1 member 1 OS=Homo sapiens GN=RSC1A1 PE=2 SV=1 - [RSCA1_HUMAN]            | 0.97  | 1 | 1 | 1 | 1  | 1.22 | 0.77 | 1.37 | 0.86 |      |      |      |      | 617  | 66.7  | 4.87 |
| P35250 | Replication factor C subunit 2 OS=Homo sapiens GN=RFC2 PE=1 SV=3 - [RFC2_HUMAN]                                    | 7.34  | 1 | 1 | 1 | 1  |      |      |      |      | 0.58 | 0.51 | 1.00 | 0.88 | 354  | 39.1  | 6.44 |
| P40938 | Replication factor C subunit 3 OS=Homo sapiens GN=RFC3 PE=1 SV=2 - [RFC3_HUMAN]                                    | 3.09  | 1 | 1 | 1 | 1  |      |      |      |      | 0.69 | 0.88 | 0.66 | 0.84 | 356  | 40.5  | 8.34 |
| Q13156 | Replication protein A 30 kDa subunit OS=Homo sapiens GN=RPA4 PE=1 SV=2 - [RFA4_HUMAN]                              | 9.58  | 1 | 1 | 1 | 1  | 0.71 | 0.76 | 0.66 | 0.72 |      |      |      |      | 261  | 28.8  | 6.52 |
| Q9HD89 | Resistin OS=Homo sapiens GN=RETN PE=2 SV=1 - [RETN_HUMAN]                                                          | 48.15 | 1 | 4 | 4 | 12 | 1.08 | 1.00 | 1.07 | 1.01 | 1.27 | 1.18 | 1.28 | 1.18 | 108  | 11.4  | 6.86 |

|        |                                                                                                             |       |   |    |    |      |      |      |      |      |      |      |      |      |      |       |      |
|--------|-------------------------------------------------------------------------------------------------------------|-------|---|----|----|------|------|------|------|------|------|------|------|------|------|-------|------|
| Q9P2K3 | REST corepressor 3 OS=Homo sapiens GN=RCOR3 PE=1 SV=2 - [RCOR3_HUMAN]                                       | 10.71 | 1 | 3  | 3  | 3    | 2.05 | 1.36 | 0.97 | 0.78 | 1.32 | 1.49 | 1.12 | 1.27 | 495  | 55.5  | 8.27 |
| Q16799 | Reticulon-1 OS=Homo sapiens GN=RTN1 PE=1 SV=1 - [RTN1_HUMAN]                                                | 4.77  | 1 | 1  | 2  | 2    | 1.29 | 1.10 |      |      |      |      |      |      | 776  | 83.6  | 4.69 |
| Q9NQC3 | Reticulon-4 OS=Homo sapiens GN=RTN4 PE=1 SV=2 - [RTN4_HUMAN]                                                | 1.09  | 1 | 1  | 1  | 3    |      |      |      |      | 1.70 | 1.77 | 1.62 | 1.69 | 1192 | 129.9 | 4.50 |
| Q86UN3 | Reticulon-4 receptor-like 2 OS=Homo sapiens GN=RTN4RL2 PE=1 SV=1 - [R4RL2_HUMAN]                            | 1.67  | 1 | 1  | 1  | 3    | 0.74 | 0.83 | 0.75 | 0.85 |      |      |      |      | 420  | 46.1  | 7.62 |
| P00352 | Retinal dehydrogenase 1 OS=Homo sapiens GN=ALDH1A1 PE=1 SV=2 - [AL1A1_HUMAN]                                | 5.79  | 1 | 2  | 3  | 5    | 0.35 | 0.42 | 0.37 | 0.45 |      |      |      |      | 501  | 54.8  | 6.73 |
| Q02846 | Retinal guanylyl cyclase 1 OS=Homo sapiens GN=GUCY2D PE=1 SV=2 - [GUC2D_HUMAN]                              | 2.72  | 1 | 2  | 2  | 5    | 1.13 | 0.98 | 0.85 | 0.79 |      |      |      |      | 1103 | 120.0 | 7.44 |
| P51841 | Retinal guanylyl cyclase 2 OS=Homo sapiens GN=GUCY2F PE=2 SV=2 - [GUC2F_HUMAN]                              | 1.62  | 1 | 1  | 1  | 27   | 1.13 | 1.36 | 1.10 | 1.38 |      |      |      |      | 1108 | 124.8 | 7.27 |
| P78363 | Retinal-specific ATP-binding cassette transporter OS=Homo sapiens GN=ABCA4 PE=1 SV=3 - [ABCA4_HUMAN]        | 0.92  | 1 | 2  | 2  | 2    | 1.19 | 1.71 | 1.23 | 1.79 | 0.31 | 0.28 | 0.29 | 0.26 | 2273 | 255.8 | 6.29 |
| P12271 | Retinaldehyde-binding protein 1 OS=Homo sapiens GN=RLBP1 PE=1 SV=2 - [RLBP1_HUMAN]                          | 7.26  | 1 | 1  | 1  | 2    | 2.04 | 1.83 | 1.19 | 1.04 |      |      |      |      | 317  | 36.5  | 5.05 |
| Q8IWN7 | Retinitis pigmentosa 1-like 1 protein OS=Homo sapiens GN=RP1L1 PE=1 SV=4 - [RP1L1_HUMAN]                    | 0.48  | 9 | 1  | 2  | 2    | 1.59 | 1.38 | 1.41 | 1.24 |      |      |      |      | 2480 | 261.0 | 4.41 |
| P06400 | Retinoblastoma-associated protein OS=Homo sapiens GN=RB1 PE=1 SV=2 - [RB_HUMAN]                             | 0.86  | 1 | 1  | 1  | 1    | 0.86 | 0.80 | 0.97 | 0.91 |      |      |      |      | 928  | 106.1 | 7.94 |
| P28749 | Retinoblastoma-like protein 1 OS=Homo sapiens GN=RBL1 PE=1 SV=3 - [RBL1_HUMAN]                              | 1.12  | 1 | 1  | 1  | 1    | 0.65 | 0.34 | 0.72 | 0.38 |      |      |      |      | 1068 | 120.8 | 7.50 |
| Q99969 | Retinoic acid receptor responder protein 2 OS=Homo sapiens GN=RARRES2 PE=1 SV=1 - [RARR2_HUMAN]             | 39.26 | 1 | 5  | 5  | 31   | 0.80 | 0.77 | 0.80 | 0.77 | 1.09 | 1.10 | 1.10 | 1.09 | 163  | 18.6  | 9.09 |
| Q8IZV5 | Retinol dehydrogenase 10 OS=Homo sapiens GN=RDH10 PE=1 SV=1 - [RDH10_HUMAN]                                 | 3.52  | 1 | 1  | 1  | 1    | 0.82 | 0.91 | 1.08 | 1.20 |      |      |      |      | 341  | 38.1  | 7.40 |
| Q96NR8 | Retinol dehydrogenase 12 OS=Homo sapiens GN=RDH12 PE=1 SV=3 - [RDH12_HUMAN]                                 | 3.48  | 1 | 1  | 1  | 1    |      |      |      |      | 1.32 | 1.37 | 1.29 | 1.34 | 316  | 35.1  | 9.69 |
| P09455 | Retinol-binding protein 1 OS=Homo sapiens GN=RBP1 PE=1 SV=2 - [RET1_HUMAN]                                  | 8.89  | 1 | 1  | 1  | 2    | 1.43 | 1.04 | 1.21 | 0.88 |      |      |      |      | 135  | 15.8  | 5.11 |
| P02753 | Retinol-binding protein 4 OS=Homo sapiens GN=RBP4 PE=1 SV=3 - [RET4_HUMAN]                                  | 82.59 | 1 | 19 | 19 | 1530 | 0.96 | 0.91 | 0.98 | 0.93 | 1.14 | 1.13 | 1.15 | 1.15 | 201  | 23.0  | 6.07 |
| Q8NET4 | Retrotransposon gag domain-containing protein 1 OS=Homo sapiens GN=RGAG1 PE=1 SV=1 - [RGAG1_HUMAN]          | 3.60  | 1 | 2  | 2  | 6    | 0.95 | 0.97 | 1.18 | 1.17 |      |      |      |      | 1388 | 144.2 | 6.16 |
| A6NKG5 | Retrotransposon-like protein 1 OS=Homo sapiens GN=RTL1 PE=2 SV=2 - [RTL1_HUMAN]                             | 1.77  | 1 | 1  | 1  | 1    | 1.22 | 1.35 | 1.18 | 1.30 |      |      |      |      | 1359 | 155.1 | 5.20 |
| O95980 | Reversion-inducing cysteine-rich protein with Kazal motifs OS=Homo sapiens GN=RECK PE=1 SV=1 - [RECK_HUMAN] | 1.24  | 1 | 1  | 1  | 1    |      |      |      |      | 1.47 | 1.29 | 1.32 | 1.16 | 971  | 106.4 | 6.74 |
| Q6NW40 | RGM domain family member B OS=Homo sapiens GN=RGMB PE=2 SV=3 - [RGMB_HUMAN]                                 | 3.66  | 1 | 1  | 1  | 1    | 0.05 | 0.02 | 0.13 | 0.06 |      |      |      |      | 437  | 47.5  | 6.38 |
| P52565 | Rho GDP-dissociation inhibitor 1 OS=Homo sapiens GN=ARHGDI1 PE=1 SV=3 - [GDIR1_HUMAN]                       | 11.27 | 1 | 2  | 2  | 5    |      |      |      |      | 0.87 | 0.88 | 0.86 | 0.85 | 204  | 23.2  | 5.11 |
| P52566 | Rho GDP-dissociation inhibitor 2 OS=Homo sapiens GN=ARHGDI2 PE=1 SV=3 - [GDIR2_HUMAN]                       | 25.87 | 1 | 4  | 4  | 12   |      |      |      |      | 2.65 | 2.20 | 2.50 | 2.12 | 201  | 23.0  | 5.21 |
| Q6P4F7 | Rho GTPase-activating protein 11A OS=Homo sapiens GN=ARHGAP11A PE=1 SV=2 - [RHGBA_HUMAN]                    | 1.56  | 1 | 1  | 1  | 1    | 1.21 | 0.98 | 1.19 | 0.98 |      |      |      |      | 1023 | 113.8 | 9.07 |
| Q68EM7 | Rho GTPase-activating protein 17 OS=Homo sapiens GN=ARHGAP17 PE=1 SV=1 - [RHG17_HUMAN]                      | 1.36  | 1 | 1  | 1  | 2    |      |      |      |      | 1.03 | 1.15 | 0.98 | 1.09 | 881  | 95.4  | 7.62 |
| Q8N392 | Rho GTPase-activating protein 18 OS=Homo sapiens GN=ARHGAP18 PE=1 SV=3 - [RHG18_HUMAN]                      | 1.96  | 1 | 1  | 1  | 6    |      |      |      |      | 1.77 | 1.64 | 1.81 | 1.67 | 663  | 74.9  | 6.44 |
| Q5T5U3 | Rho GTPase-activating protein 21 OS=Homo sapiens GN=ARHGAP21 PE=1 SV=1 - [RHG21_HUMAN]                      | 0.97  | 1 | 1  | 1  | 1    | 0.87 | 1.13 | 0.69 | 0.91 |      |      |      |      | 1957 | 217.2 | 7.80 |

|        |                                                                                                     |       |   |   |   |    |      |      |      |      |      |      |       |      |      |       |      |
|--------|-----------------------------------------------------------------------------------------------------|-------|---|---|---|----|------|------|------|------|------|------|-------|------|------|-------|------|
| Q8N264 | Rho GTPase-activating protein 24 OS=Homo sapiens<br>GN=ARHGAP24 PE=1 SV=2 - [RHG24_HUMAN]           | 2.14  | 1 | 1 | 2 | 3  |      | 0.76 | 0.27 | 6.55 | 2.32 | 748  | 84.2  | 6.67 |      |       |      |
| Q9UNA1 | Rho GTPase-activating protein 26 OS=Homo sapiens<br>GN=ARHGAP26 PE=1 SV=1 - [RHG26_HUMAN]           | 1.97  | 1 | 1 | 1 | 1  |      | 1.54 | 1.35 | 1.31 | 1.14 | 814  | 92.2  | 6.64 |      |       |      |
| Q7Z6I6 | Rho GTPase-activating protein 30 OS=Homo sapiens<br>GN=ARHGAP30 PE=1 SV=3 - [RHG30_HUMAN]           | 2.00  | 1 | 1 | 1 | 1  | 1.30 | 1.37 | 1.34 | 1.41 |      | 1101 | 118.5 | 4.81 |      |       |      |
| A7KAX9 | Rho GTPase-activating protein 32 OS=Homo sapiens<br>GN=ARHGAP32 PE=1 SV=1 - [RHG32_HUMAN]           | 3.55  | 1 | 3 | 3 | 52 | 0.68 | 0.84 | 0.67 | 0.79 | 0.91 | 0.78 | 0.80  | 0.70 | 2087 | 230.4 | 6.74 |
| Q9NRY4 | Rho GTPase-activating protein 35 OS=Homo sapiens<br>GN=ARHGAP35 PE=1 SV=2 - [RHG35_HUMAN]           | 2.97  | 1 | 2 | 4 | 8  | 1.07 | 1.23 | 1.00 | 1.15 | 1.59 | 1.52 | 1.13  | 1.09 | 1513 | 172.1 | 6.79 |
| Q6ZRI8 | Rho GTPase-activating protein 36 OS=Homo sapiens<br>GN=ARHGAP36 PE=2 SV=1 - [RHG36_HUMAN]           | 2.19  | 1 | 1 | 1 | 1  | 0.64 | 0.78 | 0.58 | 0.70 |      |      |       |      | 547  | 61.6  | 9.42 |
| Q9C0H5 | Rho GTPase-activating protein 39 OS=Homo sapiens<br>GN=ARHGAP39 PE=1 SV=2 - [RHG39_HUMAN]           | 1.39  | 1 | 1 | 1 | 2  | 1.73 | 1.97 | 1.44 | 1.65 |      |      |       |      | 1083 | 121.2 | 7.50 |
| Q5TG30 | Rho GTPase-activating protein 40 OS=Homo sapiens<br>GN=ARHGAP40 PE=2 SV=3 - [RHG40_HUMAN]           | 3.05  | 1 | 1 | 1 | 1  | 1.08 | 1.13 | 1.16 | 1.23 |      |      |       |      | 622  | 68.9  | 7.84 |
| Q96QB1 | Rho GTPase-activating protein 7 OS=Homo sapiens<br>GN=DLC1 PE=1 SV=4 - [RHG07_HUMAN]                | 6.02  | 4 | 3 | 4 | 10 | 0.78 | 0.57 | 0.46 | 0.25 |      |      |       |      | 1528 | 170.5 | 6.40 |
| P85298 | Rho GTPase-activating protein 8 OS=Homo sapiens<br>GN=ARHGAP8 PE=1 SV=1 - [RHG08_HUMAN]             | 3.23  | 1 | 1 | 1 | 1  |      |      |      |      | 3.87 | 4.83 | 0.73  | 0.91 | 464  | 53.5  | 9.41 |
| Q5VT97 | Rho GTPase-activating protein SYDE2 OS=Homo sapiens<br>GN=SYDE2 PE=1 SV=2 - [SYDE2_HUMAN]           | 2.43  | 1 | 2 | 2 | 3  | 0.84 | 0.93 | 0.78 | 0.87 |      |      |       |      | 1194 | 133.1 | 8.57 |
| Q92888 | Rho guanine nucleotide exchange factor 1 OS=Homo sapiens<br>GN=ARHGEF1 PE=1 SV=2 - [ARHG1_HUMAN]    | 0.88  | 1 | 1 | 1 | 1  | 0.90 | 1.74 | 0.90 | 1.74 |      |      |       |      | 912  | 102.4 | 5.66 |
| O15013 | Rho guanine nucleotide exchange factor 10 OS=Homo sapiens<br>GN=ARHGEF10 PE=1 SV=4 - [ARHGA_HUMAN]  | 0.80  | 1 | 1 | 1 | 1  | 1.39 | 1.51 | 1.32 | 1.44 |      |      |       |      | 1369 | 151.5 | 5.68 |
| Q9NZN5 | Rho guanine nucleotide exchange factor 12 OS=Homo sapiens<br>GN=ARHGEF12 PE=1 SV=1 - [ARHGC_HUMAN]  | 2.78  | 9 | 2 | 3 | 3  | 1.28 | 1.82 | 1.42 | 2.02 | 1.42 | 1.87 | 1.35  | 1.77 | 1544 | 173.1 | 5.74 |
| O94989 | Rho guanine nucleotide exchange factor 15 OS=Homo sapiens<br>GN=ARHGEF15 PE=1 SV=4 - [ARHGF_HUMAN]  | 7.02  | 1 | 2 | 2 | 3  | 0.71 | 1.12 | 0.79 | 1.25 |      |      |       |      | 841  | 91.9  | 8.25 |
| Q6ZS25 | Rho guanine nucleotide exchange factor 18 OS=Homo sapiens<br>GN=ARHGEF18 PE=1 SV=3 - [ARHGI_HUMAN]  | 5.54  | 1 | 4 | 4 | 8  | 0.82 | 1.08 | 0.91 | 1.22 | 0.80 | 0.86 | 0.87  | 0.94 | 1173 | 130.7 | 7.08 |
| Q92974 | Rho guanine nucleotide exchange factor 2 OS=Homo sapiens<br>GN=ARHGEF2 PE=1 SV=4 - [ARHG2_HUMAN]    | 1.12  | 1 | 1 | 1 | 1  | 0.17 | 0.08 | 0.21 | 0.10 |      |      |       |      | 986  | 111.5 | 7.27 |
| Q96DR7 | Rho guanine nucleotide exchange factor 26 OS=Homo sapiens<br>GN=ARHGEF26 PE=1 SV=4 - [ARHGQ_HUMAN]  | 2.53  | 1 | 2 | 2 | 2  | 0.92 | 0.92 | 0.95 | 0.96 |      |      |       |      | 871  | 97.3  | 8.95 |
| A5YM69 | Rho guanine nucleotide exchange factor 35 OS=Homo sapiens<br>GN=ARHGEF35 PE=1 SV=1 - [ARG35_HUMAN]  | 5.99  | 1 | 1 | 1 | 1  |      |      |      |      | 0.60 | 0.92 | 0.75  | 1.16 | 484  | 53.3  | 4.31 |
| Q12774 | Rho guanine nucleotide exchange factor 5 OS=Homo sapiens<br>GN=ARHGEF5 PE=1 SV=3 - [ARHG5_HUMAN]    | 0.88  | 1 | 1 | 1 | 1  |      |      |      |      | 0.84 | 1.05 | 1.35  | 1.68 | 1597 | 176.7 | 5.53 |
| Q15052 | Rho guanine nucleotide exchange factor 6 OS=Homo sapiens<br>GN=ARHGEF6 PE=1 SV=2 - [ARHG6_HUMAN]    | 2.45  | 2 | 2 | 2 | 6  | 1.00 | 1.05 | 1.17 | 1.22 | 1.39 | 1.17 | 1.31  | 1.15 | 776  | 87.4  | 6.05 |
| O43307 | Rho guanine nucleotide exchange factor 9 OS=Homo sapiens<br>GN=ARHGEF9 PE=1 SV=3 - [ARHG9_HUMAN]    | 2.91  | 1 | 1 | 1 | 7  | 0.88 | 1.03 | 0.93 | 1.04 | 0.66 | 0.66 | 0.69  | 0.69 | 516  | 60.9  | 5.72 |
| Q13464 | Rho-associated protein kinase 1 OS=Homo sapiens<br>GN=ROCK1 PE=1 SV=1 - [ROCK1_HUMAN]               | 0.89  | 1 | 1 | 1 | 2  | 1.60 | 1.49 | 1.35 | 1.28 |      |      |       |      | 1354 | 158.1 | 5.90 |
| Q9BY26 | Rho-related BTB domain-containing protein 2 OS=Homo sapiens<br>GN=RHOBTB2 PE=2 SV=2 - [RHBT2_HUMAN] | 2.48  | 1 | 1 | 1 | 1  | 1.83 | 2.23 | 1.91 | 2.34 |      |      |       |      | 727  | 82.6  | 6.74 |
| P08134 | Rho-related GTP-binding protein RhoC OS=Homo sapiens<br>GN=RHO�C PE=1 SV=1 - [RHOC_HUMAN]           | 21.76 | 3 | 4 | 4 | 11 | 0.87 | 0.92 | 0.86 | 0.91 | 0.87 | 0.90 | 0.80  | 0.85 | 193  | 22.0  | 6.58 |
| O00212 | Rho-related GTP-binding protein RhoD OS=Homo sapiens<br>GN=RHO�D PE=1 SV=2 - [RHOD_HUMAN]           | 4.29  | 1 | 1 | 1 | 1  |      |      |      |      | 0.79 | 0.74 | 0.94  | 0.87 | 210  | 23.4  | 7.96 |
| P58872 | Rhomboid-related protein 3 OS=Homo sapiens<br>GN=RHBDL3 PE=2 SV=1 - [RHBL3_HUMAN]                   | 1.24  | 1 | 1 | 1 | 1  |      |      |      |      | 2.14 | 1.99 | 1.89  | 1.75 | 404  | 45.2  | 7.61 |

|        |                                                                                                                      |       |   |   |   |    |      |      |      |      |       |      |      |      |      |       |       |      |
|--------|----------------------------------------------------------------------------------------------------------------------|-------|---|---|---|----|------|------|------|------|-------|------|------|------|------|-------|-------|------|
| Q8IUC4 | Rhopilin-2 OS=Homo sapiens GN=RHPN2 PE=1 SV=1 - [RHPN2_HUMAN]                                                        | 2.04  | 1 | 1 | 1 | 1  | 1.09 | 0.90 | 1.52 | 1.25 |       | 686  | 76.9 | 6.80 |      |       |       |      |
| Q9BST9 | Rhotekin OS=Homo sapiens GN=RTKN PE=1 SV=2 - [RTKN_HUMAN]                                                            | 1.24  | 1 | 1 | 1 | 1  |      |      |      |      | 0.85  | 1.04 | 0.78 | 0.96 | 563  | 62.6  | 7.44  |      |
| Q8IZC4 | Rhotekin-2 OS=Homo sapiens GN=RTKN2 PE=2 SV=1 - [RTKN2_HUMAN]                                                        | 2.13  | 1 | 1 | 1 | 1  |      |      |      |      | 0.27  | 0.47 | 0.31 | 0.53 | 609  | 69.3  | 7.83  |      |
| Q8NHV9 | Rhox homeobox family member 1 OS=Homo sapiens GN=RHOXF1 PE=2 SV=1 - [RHOXF1_HUMAN]                                   | 4.89  | 1 | 1 | 1 | 1  | 0.65 | 0.60 | 0.69 | 0.65 |       |      |      |      | 184  | 20.5  | 6.11  |      |
| P34096 | Ribonuclease 4 OS=Homo sapiens GN=RNASE4 PE=1 SV=3 - [RNASE4_HUMAN]                                                  | 40.82 | 1 | 8 | 8 | 26 |      |      |      |      | 1.22  | 1.08 | 1.13 | 1.15 | 147  | 16.8  | 9.03  |      |
| O75792 | Ribonuclease H2 subunit A OS=Homo sapiens GN=RNASEH2A PE=1 SV=2 - [RNH2A_HUMAN]                                      | 8.70  | 1 | 1 | 1 | 1  | 0.39 | 0.30 | 0.56 | 0.43 |       |      |      |      | 299  | 33.4  | 5.25  |      |
| P13489 | Ribonuclease inhibitor OS=Homo sapiens GN=RNH1 PE=1 SV=2 - [RINI_HUMAN]                                              | 10.20 | 1 | 2 | 2 | 2  |      |      |      |      | 1.27  | 1.49 | 0.77 | 0.89 | 461  | 49.9  | 4.82  |      |
| Q93091 | Ribonuclease K6 OS=Homo sapiens GN=RNASE6 PE=1 SV=2 - [RNASE6_HUMAN]                                                 | 12.00 | 1 | 1 | 1 | 2  |      |      |      |      | 0.70  | 0.71 | 0.80 | 0.80 | 150  | 17.2  | 8.76  |      |
| P07998 | Ribonuclease pancreatic OS=Homo sapiens GN=RNASE1 PE=1 SV=4 - [RNASE1_HUMAN]                                         | 19.23 | 1 | 2 | 2 | 4  | 1.02 | 0.98 | 1.15 | 1.11 | 0.96  | 0.94 | 0.99 | 0.98 | 156  | 17.6  | 8.79  |      |
| P52758 | Ribonuclease UK114 OS=Homo sapiens GN=HRSP12 PE=1 SV=1 - [UK114_HUMAN]                                               | 12.41 | 1 | 1 | 1 | 1  | 1.22 | 1.39 | 0.97 | 1.11 |       |      |      |      | 137  | 14.5  | 8.68  |      |
| Q8IY67 | Ribonucleoprotein PTB-binding 1 OS=Homo sapiens GN=RAVER1 PE=1 SV=1 - [RAVR1_HUMAN]                                  | 2.64  | 1 | 1 | 1 | 2  | #### | ###  | #### | #### | ####  | 7.61 | ###  | 7.70 | 606  | 63.8  | 8.48  |      |
| Q9HCJ3 | Ribonucleoprotein PTB-binding 2 OS=Homo sapiens GN=RAVER2 PE=1 SV=2 - [RAVR2_HUMAN]                                  | 9.41  | 1 | 2 | 2 | 3  | 1.17 | 0.98 | 0.91 | 0.76 | 3.01  | 2.66 | 2.36 | 2.09 | 691  | 74.3  | 7.47  |      |
| Q15418 | Ribosomal protein S6 kinase alpha-1 OS=Homo sapiens GN=RPS6KA1 PE=1 SV=2 - [KS6A1_HUMAN]                             | 2.18  | 1 | 1 | 1 | 6  | 0.81 | 0.78 | 0.80 | 0.73 |       |      |      |      | 735  | 82.7  | 7.83  |      |
| Q9Y6S9 | Ribosomal protein S6 kinase-like 1 OS=Homo sapiens GN=RPS6KL1 PE=2 SV=1 - [RPKL1_HUMAN]                              | 3.28  | 1 | 1 | 1 | 1  |      |      |      |      | 11.05 | 9.56 | ###  | 8.81 | 549  | 60.0  | 7.43  |      |
| Q14692 | Ribosome biogenesis protein BMS1 homolog OS=Homo sapiens GN=BMS1 PE=1 SV=1 - [BMS1_HUMAN]                            | 1.95  | 1 | 2 | 2 | 6  | 0.86 | 0.98 | 1.07 | 1.22 | 1.36  | 1.13 | 1.03 | 0.76 | 1282 | 145.7 | 6.44  |      |
| Q8TDN6 | Ribosome biogenesis protein BRX1 homolog OS=Homo sapiens GN=BRX1 PE=1 SV=2 - [BRX1_HUMAN]                            | 5.10  | 1 | 1 | 1 | 1  | 0.94 | 1.04 | 0.86 | 0.95 |       |      |      |      | 353  | 41.4  | 9.92  |      |
| Q9H7B2 | Ribosome production factor 2 homolog OS=Homo sapiens GN=RPF2 PE=1 SV=2 - [RPF2_HUMAN]                                | 3.27  | 1 | 1 | 1 | 1  | 0.14 | 0.14 | 0.13 | 0.13 |       |      |      |      | 306  | 35.6  | 9.99  |      |
| Q9P2E9 | Ribosome-binding protein 1 OS=Homo sapiens GN=RRBP1 PE=1 SV=4 - [RRBP1_HUMAN]                                        | 3.55  | 1 | 4 | 4 | 12 | 0.80 | 1.03 | 0.92 | 1.19 | 0.63  | 0.65 | 0.72 | 0.75 | 1410 | 152.4 | 8.60  |      |
| Q96AT9 | Ribulose-phosphate 3-epimerase OS=Homo sapiens GN=RPE PE=1 SV=1 - [RPE_HUMAN]                                        | 3.07  | 1 | 1 | 1 | 2  |      |      |      |      | 0.81  | 0.77 | 0.80 | 0.75 | 228  | 24.9  | 5.58  |      |
| Q969X0 | RILP-like protein 2 OS=Homo sapiens GN=RILPL2 PE=1 SV=1 - [RIPL2_HUMAN]                                              | 2.37  | 1 | 1 | 1 | 1  |      |      |      |      | 1.32  | 0.69 | 1.46 | 0.76 | 211  | 24.0  | 4.98  |      |
| A6NJZ7 | RIMS-binding protein 3C OS=Homo sapiens GN=RIMBP3C PE=1 SV=3 - [RIM3C_HUMAN]                                         | 3.17  | 5 | 3 | 3 | 3  |      |      |      |      | 0.38  | 0.13 | 0.10 | 0.38 | 0.28 | 1639  | 180.8 | 6.77 |
| Q9HBD1 | RING finger and CCCH-type zinc finger domain-containing protein 2 OS=Homo sapiens GN=RC3H2 PE=1 SV=2 - [RC3H2_HUMAN] | 1.09  | 1 | 1 | 1 | 1  | 0.72 | 0.85 | 0.78 | 0.93 |       |      |      |      | 1191 | 131.6 | 6.89  |      |
| Q96DX4 | RING finger and SPRY domain-containing protein 1 OS=Homo sapiens GN=RSPRY1 PE=2 SV=1 - [RSPRY_HUMAN]                 | 3.65  | 1 | 2 | 2 | 13 | 0.67 | 0.75 | 0.76 | 0.87 | 1.30  | 0.91 | 1.06 | 0.99 | 576  | 64.1  | 5.57  |      |
| Q5M7Z0 | RING finger and transmembrane domain-containing protein 1 OS=Homo sapiens GN=RNFT1 PE=2 SV=2 - [RNFT1_HUMAN]         | 2.07  | 1 | 1 | 1 | 1  | 0.46 | 0.48 | 0.45 | 0.47 |       |      |      |      | 435  | 49.7  | 8.53  |      |
| Q9BV68 | RING finger protein 126 OS=Homo sapiens GN=RNF126 PE=1 SV=1 - [RN126_HUMAN]                                          | 8.59  | 1 | 1 | 1 | 1  | 1.62 |      | 1.15 |      |       |      |      |      | 326  | 35.6  | 5.72  |      |
| Q8WVD5 | RING finger protein 141 OS=Homo sapiens GN=RNF141 PE=1 SV=1 - [RN141_HUMAN]                                          | 7.83  | 1 | 1 | 1 | 1  |      |      |      |      | 0.84  | 1.09 | 1.23 | 1.60 | 230  | 25.5  | 5.20  |      |
| Q8NCN4 | RING finger protein 169 OS=Homo sapiens GN=RNF169 PE=1 SV=2 - [RN169_HUMAN]                                          | 7.20  | 1 | 3 | 3 | 4  | 1.02 | 0.67 | 0.54 | 0.36 | 1.23  | 0.91 | 1.06 | 0.79 | 708  | 77.1  | 9.10  |      |

|        |                                                                                                                     |       |   |   |   |    |      |      |      |      |      |      |      |      |      |       |      |       |      |       |       |      |
|--------|---------------------------------------------------------------------------------------------------------------------|-------|---|---|---|----|------|------|------|------|------|------|------|------|------|-------|------|-------|------|-------|-------|------|
| Q9BXT8 | RING finger protein 17 OS=Homo sapiens GN=RNF17 PE=1 SV=3 - [RNF17_HUMAN]                                           | 0.43  | 1 | 1 | 1 | 1  |      |      |      |      |      |      |      |      |      |       |      | 1.01  | 0.71 | 1623  | 184.5 | 5.40 |
| Q96D59 | RING finger protein 183 OS=Homo sapiens GN=RNF183 PE=2 SV=1 - [RNF183_HUMAN]                                        | 21.35 | 1 | 1 | 1 | 1  |      |      |      |      |      |      |      |      |      |       |      | 1.35  | 0.71 | 192   | 21.7  | 7.85 |
| Q6ZRF8 | RING finger protein 207 OS=Homo sapiens GN=RNF207 PE=1 SV=2 - [RNF207_HUMAN]                                        | 3.63  | 1 | 2 | 2 | 2  | 1.12 | 1.16 | 1.15 | 1.21 | 0.80 | 1.07 | 0.94 | 1.26 | 634  | 70.8  | 6.68 |       |      |       |       |      |
| Q5W0B1 | RING finger protein 219 OS=Homo sapiens GN=RNF219 PE=1 SV=1 - [RNF219_HUMAN]                                        | 0.96  | 1 | 1 | 1 | 1  |      |      |      |      |      |      |      |      | 0.73 | 0.76  | 1.19 | 1.23  | 726  | 81.1  | 5.72  |      |
| Q9Y225 | RING finger protein 24 OS=Homo sapiens GN=RNF24 PE=1 SV=1 - [RNF24_HUMAN]                                           | 9.46  | 1 | 1 | 1 | 1  |      |      |      |      |      |      |      |      | 0.58 | 0.67  | 0.73 | 0.85  | 148  | 17.2  | 8.54  |      |
| Q8TBZ6 | RNA (guanine-9-)-methyltransferase domain-containing protein 2 OS=Homo sapiens GN=RG9MTD2 PE=2 SV=1 - [RG9D2_HUMAN] | 4.42  | 1 | 1 | 1 | 1  |      |      |      |      |      |      |      |      | 1.09 | 1.81  | 1.15 | 1.91  | 339  | 39.7  | 7.65  |      |
| Q9Y2P8 | RNA 3'-terminal phosphate cyclase-like protein OS=Homo sapiens GN=RCL1 PE=1 SV=3 - [RCL1_HUMAN]                     | 2.14  | 1 | 1 | 1 | 1  | 0.96 | 1.09 | 0.80 | 0.92 |      |      |      |      |      |       |      |       |      | 373   | 40.8  | 9.26 |
| O00472 | RNA polymerase II elongation factor ELL2 OS=Homo sapiens GN=ELL2 PE=1 SV=2 - [ELL2_HUMAN]                           | 2.03  | 1 | 1 | 1 | 1  |      |      |      |      |      |      |      |      | 1.30 | 1.21  | 1.19 | 1.10  | 640  | 72.3  | 9.00  |      |
| Q9HB65 | RNA polymerase II elongation factor ELL3 OS=Homo sapiens GN=ELL3 PE=2 SV=2 - [ELL3_HUMAN]                           | 3.78  | 1 | 1 | 1 | 10 |      |      |      |      |      |      |      |      | 1.08 | 0.93  | 1.14 | 0.97  | 397  | 45.3  | 6.06  |      |
| Q8N7H5 | RNA polymerase II-associated factor 1 homolog OS=Homo sapiens GN=PAF1 PE=1 SV=2 - [PAF1_HUMAN]                      | 3.95  | 1 | 1 | 1 | 3  |      |      |      |      |      |      |      |      | 1.05 | 1.19  | 1.17 | 1.32  | 531  | 59.9  | 4.63  |      |
| Q9BWH6 | RNA polymerase II-associated protein 1 OS=Homo sapiens GN=RPAP1 PE=1 SV=3 - [RPAP1_HUMAN]                           | 3.73  | 1 | 3 | 3 | 8  | 0.61 | 0.62 |      |      |      |      |      |      | 0.80 | 0.96  | 0.87 | 0.87  | 1393 | 152.7 | 6.38  |      |
| Q9H6T3 | RNA polymerase II-associated protein 3 OS=Homo sapiens GN=RPAP3 PE=1 SV=2 - [RPAP3_HUMAN]                           | 1.35  | 1 | 1 | 1 | 2  |      |      |      |      |      |      |      |      | 1.05 | 0.99  | 0.87 | 0.82  | 665  | 75.7  | 6.84  |      |
| Q8IZ73 | RNA pseudouridylylase domain-containing protein 2 OS=Homo sapiens GN=RPUSD2 PE=1 SV=2 - [RUSD2_HUMAN]               | 3.85  | 1 | 1 | 1 | 1  |      |      |      |      |      |      |      |      | 0.56 | 0.46  | 1.07 | 0.88  | 545  | 61.3  | 7.17  |      |
| P38159 | RNA-binding motif protein, X chromosome OS=Homo sapiens GN=RBMX PE=1 SV=3 - [RBMX_HUMAN]                            | 3.58  | 1 | 1 | 1 | 1  |      |      |      |      |      |      |      |      | 1.10 | 1.09  | 0.93 | 0.92  | 391  | 42.3  | 10.05 |      |
| Q8N7X1 | RNA-binding motif protein, X-linked-like-3 OS=Homo sapiens GN=RBMXL3 PE=2 SV=2 - [RBMXL3_HUMAN]                     | 1.50  | 1 | 1 | 1 | 1  |      |      |      |      |      |      |      |      | 2.82 | 2.56  | 1067 | 114.9 | 9.10 |       |       |      |
| Q6ZP01 | RNA-binding protein 44 OS=Homo sapiens GN=RBM44 PE=2 SV=2 - [RBM44_HUMAN]                                           | 5.23  | 1 | 4 | 4 | 8  | 0.75 | 0.66 | 0.87 | 0.77 | 1.33 | 1.20 | 1.17 | 1.06 | 1051 | 117.9 | 5.72 |       |      |       |       |      |
| Q8IUH3 | RNA-binding protein 45 OS=Homo sapiens GN=RBM45 PE=1 SV=1 - [RBM45_HUMAN]                                           | 2.73  | 1 | 1 | 1 | 2  |      |      |      |      |      |      |      |      | 0.94 | 0.91  | 1.03 | 0.99  | 476  | 53.5  | 7.17  |      |
| Q5RL73 | RNA-binding protein 48 OS=Homo sapiens GN=RBM48 PE=2 SV=1 - [RBM48_HUMAN]                                           | 2.72  | 1 | 1 | 1 | 1  |      |      |      |      |      |      |      |      | 1.01 | 0.75  | 1.08 | 0.80  | 367  | 41.8  | 8.72  |      |
| P78332 | RNA-binding protein 6 OS=Homo sapiens GN=RBM6 PE=1 SV=5 - [RBM6_HUMAN]                                              | 1.25  | 1 | 1 | 1 | 1  |      |      |      |      |      |      |      |      | 1.07 | 1.11  | 1.01 | 1.05  | 1123 | 128.6 | 6.32  |      |
| Q01844 | RNA-binding protein EWS OS=Homo sapiens GN=EWSR1 PE=1 SV=1 - [EWS_HUMAN]                                            | 5.18  | 1 | 1 | 1 | 1  |      |      |      |      |      |      |      |      | 0.39 | 0.42  | 0.55 | 0.59  | 656  | 68.4  | 9.33  |      |
| A1L020 | RNA-binding protein MEX3A OS=Homo sapiens GN=MEX3A PE=1 SV=1 - [MEX3A_HUMAN]                                        | 2.31  | 1 | 1 | 1 | 1  | 0.76 | 0.93 | 0.89 | 1.09 |      |      |      |      |      |       |      |       |      | 520   | 54.1  | 7.27 |
| Q6ZRY4 | RNA-binding protein with multiple splicing 2 OS=Homo sapiens GN=RBPMS2 PE=2 SV=1 - [RBPMS2_HUMAN]                   | 5.26  | 1 | 1 | 1 | 3  |      |      |      |      |      |      |      |      | 1.14 | 1.19  | 1.14 | 1.18  | 209  | 22.5  | 8.60  |      |
| Q5TZA2 | Rootletin OS=Homo sapiens GN=CROCC PE=1 SV=1 - [CROCC_HUMAN]                                                        | 1.29  | 2 | 1 | 3 | 3  | 1.14 | 1.02 | 1.21 | 1.08 |      |      |      |      |      |       |      |       |      | 2017  | 228.4 | 5.50 |
| Q96C74 | Ropporin-1-like protein OS=Homo sapiens GN=ROPN1L PE=1 SV=2 - [ROP1L_HUMAN]                                         | 9.13  | 1 | 1 | 1 | 1  | 1.29 | 1.23 | 1.39 | 1.34 |      |      |      |      |      |       |      |       |      | 230   | 26.1  | 7.72 |
| Q86VV8 | Rotatin OS=Homo sapiens GN=RTTN PE=1 SV=3 - [RTTN_HUMAN]                                                            | 1.57  | 1 | 2 | 2 | 2  | 0.71 | 0.67 | 0.76 | 0.72 |      |      |      |      |      |       |      |       |      | 2226  | 248.5 | 6.70 |
| Q6PCB5 | Round spermatid basic protein 1-like protein OS=Homo sapiens GN=RSBN1L PE=1 SV=2 - [RSBN1L_HUMAN]                   | 2.01  | 2 | 1 | 2 | 26 | 1.00 | 1.14 | 1.01 | 1.15 |      |      |      |      |      |       |      |       |      | 846   | 94.8  | 8.78 |
| Q9Y6N7 | Roundabout homolog 1 OS=Homo sapiens GN=ROBO1 PE=1 SV=1 - [ROBO1_HUMAN]                                             | 1.21  | 1 | 1 | 1 | 3  | 0.94 | 0.80 | 0.98 | 0.77 |      |      |      |      |      |       |      |       |      | 1651  | 180.8 | 6.04 |

|        |                                                                                                                           |       |   |   |   |    |      |      |      |      |      |      |      |      |      |       |       |       |      |      |      |      |       |      |  |  |
|--------|---------------------------------------------------------------------------------------------------------------------------|-------|---|---|---|----|------|------|------|------|------|------|------|------|------|-------|-------|-------|------|------|------|------|-------|------|--|--|
| Q9HCK4 | Roundabout homolog 2 OS=Homo sapiens GN=ROBO2 PE=1 SV=2 - [ROBO2_HUMAN]                                                   | 1.16  | 1 | 1 | 1 | 1  |      |      |      |      |      |      |      |      |      |       |       | 1.12  | 1.16 | 1.05 | 1.09 | 1378 | 151.1 | 6.33 |  |  |
| Q96MS0 | Roundabout homolog 3 OS=Homo sapiens GN=ROBO3 PE=1 SV=2 - [ROBO3_HUMAN]                                                   | 2.45  | 1 | 2 | 2 | 2  | 1.13 | 1.18 | 0.98 | 1.02 |      |      |      |      |      |       |       |       |      |      |      | 1386 | 148.1 | 7.14 |  |  |
| Q8WZ75 | Roundabout homolog 4 OS=Homo sapiens GN=ROBO4 PE=1 SV=1 - [ROBO4_HUMAN]                                                   | 4.37  | 1 | 4 | 4 | 14 | 1.03 | 0.95 | 1.00 | 0.94 | 0.94 | 0.88 | 0.97 | 0.92 | 1007 | 107.4 | 6.64  |       |      |      |      |      |       |      |  |  |
| Q9BRU9 | rRNA-processing protein UTP23 homolog OS=Homo sapiens GN=UTP23 PE=2 SV=2 - [UTP23_HUMAN]                                  | 5.22  | 1 | 1 | 1 | 1  |      |      |      |      |      | 0.81 | 0.76 | 0.83 | 0.79 | 249   | 28.4  | 10.07 |      |      |      |      |       |      |  |  |
| Q8WXA3 | RUN and FYVE domain-containing protein 2 OS=Homo sapiens GN=RUFY2 PE=1 SV=2 - [RUFY2_HUMAN]                               | 4.73  | 1 | 3 | 3 | 9  | 1.25 | 1.42 | 1.21 | 1.38 | 2.61 | 2.85 | 2.43 | 2.65 | 655  | 75.0  | 6.51  |       |      |      |      |      |       |      |  |  |
| Q92622 | Run domain Beclin-1 interacting and cystein-rich containing protein OS=Homo sapiens GN=KIAA0226 PE=1 SV=4 - [RUBIC_HUMAN] | 4.32  | 1 | 2 | 2 | 2  | 1.30 | 1.34 | 1.35 | 1.39 | 1.03 | 0.48 | 1.08 | 0.51 | 972  | 108.6 | 6.25  |       |      |      |      |      |       |      |  |  |
| Q96C34 | RUN domain-containing protein 1 OS=Homo sapiens GN=RUNDC1 PE=1 SV=3 - [RUND1_HUMAN]                                       | 14.03 | 1 | 4 | 4 | 6  | 0.77 | 0.56 | 0.66 | 0.48 | 0.99 | 0.76 | 1.00 | 0.77 | 613  | 67.6  | 6.19  |       |      |      |      |      |       |      |  |  |
| Q9Y265 | RuvB-like 1 OS=Homo sapiens GN=RUVBL1 PE=1 SV=1 - [RUVB1_HUMAN]                                                           | 3.07  | 1 | 1 | 1 | 2  |      |      |      |      |      | 0.41 |      |      |      | 456   | 50.2  | 6.42  |      |      |      |      |       |      |  |  |
| Q92736 | Ryanodine receptor 2 OS=Homo sapiens GN=RYR2 PE=1 SV=3 - [RYR2_HUMAN]                                                     | 1.75  | 1 | 4 | 4 | 10 | 1.00 | 0.88 | 0.82 | 0.72 | 0.44 | 0.28 | 1.08 | 0.69 | 4967 | 564.2 | 6.07  |       |      |      |      |      |       |      |  |  |
| Q15413 | Ryanodine receptor 3 OS=Homo sapiens GN=RYR3 PE=1 SV=3 - [RYR3_HUMAN]                                                     | 0.62  | 1 | 1 | 1 | 2  |      |      |      |      |      |      | 0.89 | 0.70 | 0.68 | 0.53  | 4870  | 551.7 | 5.68 |      |      |      |       |      |  |  |
| Q9BY12 | S phase cyclin A-associated protein in the endoplasmic reticulum OS=Homo sapiens GN=SCAPER PE=1 SV=1 - [SCAPE_HUMAN]      | 1.07  | 1 | 1 | 1 | 1  |      |      |      |      |      |      | 0.33 | 1.08 | 0.59 | 1.91  | 1399  | 158.1 | 7.44 |      |      |      |       |      |  |  |
| Q70HW3 | S-adenosylmethionine mitochondrial carrier protein OS=Homo sapiens GN=SLC25A26 PE=2 SV=1 - [SAMC_HUMAN]                   | 6.93  | 5 | 1 | 2 | 2  | 0.96 | 1.05 | 1.00 | 1.10 |      |      |      |      |      | 274   | 29.4  | 9.35  |      |      |      |      |       |      |  |  |
| Q00266 | S-adenosylmethionine synthase isoform type-1 OS=Homo sapiens GN=MAT1A PE=1 SV=2 - [METK1_HUMAN]                           | 4.56  | 1 | 1 | 1 | 4  |      |      |      |      |      |      | 1.04 | 1.09 | 1.10 | 1.14  | 395   | 43.6  | 6.29 |      |      |      |       |      |  |  |
| P10523 | S-arrestin OS=Homo sapiens GN=SAG PE=2 SV=3 - [ARRS_HUMAN]                                                                | 5.43  | 1 | 1 | 1 | 1  | 1.22 | 0.87 | 1.34 | 0.95 |      |      |      |      |      | 405   | 45.1  | 6.57  |      |      |      |      |       |      |  |  |
| P10768 | S-formylglutathione hydrolase OS=Homo sapiens GN=ESD PE=1 SV=2 - [ESTD_HUMAN]                                             | 5.67  | 1 | 2 | 2 | 3  | 0.63 | 0.63 | 0.65 | 0.66 | 0.99 | 1.02 | 1.03 | 1.06 | 282  | 31.4  | 7.02  |       |      |      |      |      |       |      |  |  |
| Q8N5C6 | S1 RNA-binding domain-containing protein 1 OS=Homo sapiens GN=SRBD1 PE=1 SV=2 - [SRBD1_HUMAN]                             | 0.90  | 1 | 1 | 1 | 1  | 1.23 | 1.46 | 1.16 | 1.40 |      |      |      |      |      | 995   | 111.7 | 8.72  |      |      |      |      |       |      |  |  |
| Q8NBX0 | Saccharopine dehydrogenase-like oxidoreductase OS=Homo sapiens GN=SCCPDH PE=1 SV=1 - [SCPDL_HUMAN]                        | 3.03  | 1 | 1 | 1 | 1  |      |      |      |      |      |      | 0.97 | 0.97 | 0.93 | 0.94  | 429   | 47.1  | 9.14 |      |      |      |       |      |  |  |
| Q9NZJ4 | Sacsin OS=Homo sapiens GN=SACS PE=1 SV=2 - [SACS_HUMAN]                                                                   | 1.68  | 1 | 5 | 5 | 36 | 0.95 | 0.88 | 0.97 | 0.98 | 1.17 | 1.27 | 0.99 | 1.37 | 4579 | 520.8 | 7.05  |       |      |      |      |      |       |      |  |  |
| Q9NWH9 | SAFB-like transcription modulator OS=Homo sapiens GN=SLTM PE=1 SV=2 - [SLTM_HUMAN]                                        | 0.87  | 1 | 1 | 1 | 1  | 0.96 | 0.91 | 1.12 | 1.06 |      |      |      |      |      | 1034  | 117.1 | 7.87  |      |      |      |      |       |      |  |  |
| Q9Y467 | Sal-like protein 2 OS=Homo sapiens GN=SALL2 PE=1 SV=4 - [SALL2_HUMAN]                                                     | 3.48  | 1 | 2 | 2 | 2  | 1.19 | 1.43 | 1.20 | 1.46 |      |      |      |      |      | 1007  | 105.2 | 6.30  |      |      |      |      |       |      |  |  |
| Q9BXA9 | Sal-like protein 3 OS=Homo sapiens GN=SALL3 PE=2 SV=2 - [SALL3_HUMAN]                                                     | 2.23  | 1 | 1 | 1 | 1  | 1.04 | 1.07 | 0.96 | 0.99 |      |      |      |      |      | 1300  | 135.3 | 6.99  |      |      |      |      |       |      |  |  |
| P02810 | Salivary acidic proline-rich phosphoprotein 1/2 OS=Homo sapiens GN=PRH1 PE=1 SV=2 - [PRPC_HUMAN]                          | 26.51 | 1 | 1 | 1 | 13 | 0.86 | 0.59 | 0.61 | 0.42 |      |      |      |      |      | 166   | 17.0  | 4.84  |      |      |      |      |       |      |  |  |
| O75995 | SAM and SH3 domain-containing protein 3 OS=Homo sapiens GN=SASH3 PE=1 SV=2 - [SASH3_HUMAN]                                | 5.53  | 1 | 1 | 1 | 1  | 0.36 | 0.25 | 0.79 | 0.57 |      |      |      |      |      | 380   | 41.6  | 5.27  |      |      |      |      |       |      |  |  |
| Q9Y3Z3 | SAM domain and HD domain-containing protein 1 OS=Homo sapiens GN=SAMHD1 PE=1 SV=2 - [SAMH1_HUMAN]                         | 2.56  | 1 | 1 | 1 | 1  |      |      |      |      |      |      | 1.04 | 0.89 | 1.24 | 1.06  | 626   | 72.2  | 7.14 |      |      |      |       |      |  |  |
| Q86TD4 | Sarcalumenin OS=Homo sapiens GN=SRL PE=2 SV=2 - [SRCA_HUMAN]                                                              | 0.97  | 1 | 1 | 1 | 1  |      |      |      |      |      |      | 5.89 | 3.84 | 4.79 | 3.12  | 932   | 100.7 | 4.40 |      |      |      |       |      |  |  |
| Q14BN4 | Sarcolemmal membrane-associated protein OS=Homo sapiens GN=SLMAP PE=1 SV=1 - [SLMAP_HUMAN]                                | 1.81  | 1 | 1 | 2 | 11 | 0.82 | 0.74 | 0.91 | 0.81 |      |      |      |      |      | 828   | 95.1  | 5.47  |      |      |      |      |       |      |  |  |
| Q9NXZ1 | Sarcoma antigen 1 OS=Homo sapiens GN=SAGE1 PE=2 SV=2 - [SAGE1_HUMAN]                                                      | 4.54  | 1 | 2 | 2 | 2  |      |      |      |      |      |      | 0.75 | 0.75 | 0.69 | 0.70  | 904   | 99.2  | 6.48 |      |      |      |       |      |  |  |

|        |                                                                                                             |       |   |    |    |    |      |      |      |      |       |      |      |      |      |       |      |       |      |
|--------|-------------------------------------------------------------------------------------------------------------|-------|---|----|----|----|------|------|------|------|-------|------|------|------|------|-------|------|-------|------|
| O14983 | Sarcoplasmic/endoplasmic reticulum calcium ATPase 1 OS=Homo sapiens GN=ATP2A1 PE=1 SV=1 - [AT2A1_HUMAN]     | 1.60  | 1 | 1  | 1  | 4  | 1.25 | 1.21 | 1.60 | 1.55 |       |      |      |      |      |       | 1001 | 110.2 | 5.16 |
| Q6R2W3 | SCAN domain-containing protein 3 OS=Homo sapiens GN=SCAND3 PE=2 SV=1 - [SCND3_HUMAN]                        | 1.36  | 1 | 1  | 1  | 10 | 0.82 | 0.67 | 0.77 | 0.64 | 1.17  | 1.18 | 1.18 | 1.21 | 1325 | 151.6 | 6.73 |       |      |
| Q96C86 | Scavenger mRNA-decapping enzyme DcpS OS=Homo sapiens GN=DCPS PE=1 SV=2 - [DCPS_HUMAN]                       | 5.64  | 1 | 1  | 1  | 1  | 1.09 | 0.90 | 0.92 | 0.76 |       |      |      |      | 337  | 38.6  | 6.38 |       |      |
| Q6AZY7 | Scavenger receptor class A member 3 OS=Homo sapiens GN=SCARA3 PE=2 SV=1 - [SCAR3_HUMAN]                     | 6.93  | 1 | 2  | 2  | 3  | 0.76 | 0.66 | 0.81 | 0.71 |       | 0.83 |      |      | 606  | 65.1  | 6.54 |       |      |
| Q6ZMJ2 | Scavenger receptor class A member 5 OS=Homo sapiens GN=SCARA5 PE=2 SV=1 - [SCAR5_HUMAN]                     | 4.65  | 1 | 1  | 1  | 2  |      |      |      |      | 1.14  | 1.00 | 1.06 | 0.93 | 495  | 54.0  | 7.09 |       |      |
| Q14162 | Scavenger receptor class F member 1 OS=Homo sapiens GN=SCARF1 PE=1 SV=3 - [SREC_HUMAN]                      | 2.41  | 1 | 1  | 1  | 1  | 0.80 | 1.08 | 0.85 | 1.17 |       |      |      |      | 830  | 87.3  | 6.37 |       |      |
| Q96GP6 | Scavenger receptor class F member 2 OS=Homo sapiens GN=SCARF2 PE=1 SV=4 - [SREC2_HUMAN]                     | 3.91  | 1 | 2  | 2  | 2  | 1.72 | 1.01 | 1.97 | 1.70 |       |      |      |      | 870  | 92.4  | 8.44 |       |      |
| Q86VB7 | Scavenger receptor cysteine-rich type 1 protein M130 OS=Homo sapiens GN=CD163 PE=1 SV=2 - [C163A_HUMAN]     | 16.18 | 1 | 16 | 16 | 41 | 0.90 | 0.89 | 0.82 | 0.80 | 0.93  | 0.82 | 0.93 | 0.93 | 1156 | 125.4 | 5.95 |       |      |
| Q8IYM2 | Schlafen family member 12 OS=Homo sapiens GN=SLFN12 PE=1 SV=2 - [SLN12_HUMAN]                               | 1.04  | 1 | 1  | 1  | 1  |      |      |      |      | 0.84  | 0.34 | 0.92 | 0.37 | 578  | 66.9  | 8.59 |       |      |
| Q6IEE8 | Schlafen family member 12-like OS=Homo sapiens GN=SLFN12L PE=2 SV=3 - [SN12L_HUMAN]                         | 1.94  | 1 | 1  | 1  | 1  |      |      |      |      | 0.94  | 0.95 | 0.92 | 0.93 | 620  | 70.5  | 8.02 |       |      |
| Q15468 | SCL-interrupting locus protein OS=Homo sapiens GN=STIL PE=1 SV=2 - [STIL_HUMAN]                             | 1.17  | 1 | 1  | 1  | 16 | 1.05 | 1.10 | 1.07 | 1.17 | 0.52  | 0.77 | 0.90 | 1.34 | 1287 | 142.9 | 6.46 |       |      |
| Q9UHJ3 | Scm-like with four MBT domains protein 1 OS=Homo sapiens GN=SFMBT1 PE=1 SV=2 - [SMBT1_HUMAN]                | 1.27  | 1 | 1  | 1  | 1  |      |      |      |      | 11.37 | 8.60 | ###  | 8.22 | 866  | 98.1  | 6.21 |       |      |
| Q6P3W7 | SCY1-like protein 2 OS=Homo sapiens GN=SCYL2 PE=1 SV=1 - [SCYL2_HUMAN]                                      | 0.65  | 1 | 1  | 1  | 1  | 0.95 | 0.81 | 1.10 | 0.95 |       |      |      |      | 929  | 103.6 | 8.22 |       |      |
| Q8WU76 | Sec1 family domain-containing protein 2 OS=Homo sapiens GN=SCFD2 PE=1 SV=2 - [SCFD2_HUMAN]                  | 1.02  | 1 | 1  | 1  | 1  |      |      |      |      | 1.20  | 1.29 | 1.24 | 1.33 | 684  | 75.1  | 6.68 |       |      |
| Q86VW0 | SEC14 domain and spectrin repeat-containing protein 1 OS=Homo sapiens GN=SESTD1 PE=1 SV=2 - [SESD1_HUMAN]   | 3.02  | 1 | 2  | 2  | 6  | 1.10 | 1.15 | 1.09 | 1.14 | 0.81  | 0.78 | 0.71 | 0.69 | 696  | 79.3  | 5.10 |       |      |
| Q96FV2 | Secernin-2 OS=Homo sapiens GN=SCRN2 PE=2 SV=3 - [SCRN2_HUMAN]                                               | 6.35  | 1 | 2  | 2  | 2  | 1.16 | 1.02 | 1.14 | 1.01 |       | 0.64 | 0.52 | 425  | 46.6 | 5.67  |      |       |      |
| Q8WVN6 | Secreted and transmembrane protein 1 OS=Homo sapiens GN=SECTM1 PE=1 SV=2 - [SCTM1_HUMAN]                    | 6.45  | 1 | 1  | 1  | 3  |      |      |      |      | 0.95  | 0.95 | 0.96 | 0.96 | 248  | 27.0  | 7.43 |       |      |
| Q8N474 | Secreted frizzled-related protein 1 OS=Homo sapiens GN=SFRP1 PE=1 SV=1 - [SFRP1_HUMAN]                      | 5.10  | 1 | 1  | 1  | 1  |      |      |      |      | 0.80  | 0.79 | 0.83 | 0.82 | 314  | 35.4  | 8.85 |       |      |
| Q13103 | Secreted phosphoprotein 24 OS=Homo sapiens GN=SPP2 PE=1 SV=1 - [SPP24_HUMAN]                                | 26.54 | 1 | 6  | 6  | 14 | 0.85 | 1.03 | 0.88 | 1.08 | 0.93  | 0.90 | 1.05 | 0.97 | 211  | 24.3  | 8.32 |       |      |
| Q96PL1 | Secretoglobin family 3A member 2 OS=Homo sapiens GN=SCGB3A2 PE=1 SV=1 - [SG3A2_HUMAN]                       | 33.33 | 1 | 2  | 2  | 3  | 1.53 | 1.64 | 1.47 | 1.58 |       |      |      |      | 93   | 10.2  | 7.28 |       |      |
| P05060 | Secretogranin-1 OS=Homo sapiens GN=CHGB PE=1 SV=2 - [SCG1_HUMAN]                                            | 1.92  | 1 | 1  | 1  | 1  |      |      |      |      | 1.11  | 1.32 | 1.01 | 1.20 | 677  | 78.2  | 5.07 |       |      |
| Q8WXD2 | Secretogranin-3 OS=Homo sapiens GN=SCG3 PE=1 SV=3 - [SCG3_HUMAN]                                            | 1.50  | 1 | 1  | 1  | 1  | 1.18 | 1.39 | 1.20 | 1.43 |       |      |      |      | 468  | 53.0  | 5.03 |       |      |
| O15126 | Secretory carrier-associated membrane protein 1 OS=Homo sapiens GN=SCAMP1 PE=1 SV=2 - [SCAM1_HUMAN]         | 3.25  | 1 | 1  | 1  | 1  |      |      |      |      | 0.65  | 0.59 | 0.61 | 0.56 | 338  | 37.9  | 7.42 |       |      |
| Q9NZH5 | Securin-2 OS=Homo sapiens GN=PTTG2 PE=1 SV=2 - [PTTG2_HUMAN]                                                | 20.30 | 1 | 2  | 2  | 11 | 0.79 | 0.93 | 0.85 | 0.93 | 0.99  | 1.01 | 1.00 | 0.99 | 202  | 22.3  | 6.25 |       |      |
| Q9UHJ6 | Sedoheptulokinase OS=Homo sapiens GN=SHPK PE=1 SV=3 - [SHPK_HUMAN]                                          | 3.77  | 1 | 1  | 1  | 1  | 1.28 | 1.43 | 1.15 | 1.29 |       |      |      |      | 478  | 51.5  | 6.83 |       |      |
| P54792 | Segment polarity protein dishevelled homolog DVL-1-like OS=Homo sapiens GN=DVL1L1 PE=1 SV=1 - [DVL1L_HUMAN] | 2.09  | 2 | 1  | 1  | 1  |      |      |      |      | 1.30  | 1.65 | 1.25 | 1.59 | 670  | 73.2  | 6.46 |       |      |
| Q6UXD5 | Seizure 6-like protein 2 OS=Homo sapiens GN=SEZ6L2 PE=1 SV=2 - [SE6L2_HUMAN]                                | 1.21  | 1 | 1  | 1  | 2  | 1.14 | 1.28 | 1.15 | 1.30 |       |      |      |      | 910  | 97.5  | 4.89 |       |      |

|        |                                                                                                           |       |   |    |    |    |      |      |      |      |      |      |      |      |      |       |       |      |       |      |
|--------|-----------------------------------------------------------------------------------------------------------|-------|---|----|----|----|------|------|------|------|------|------|------|------|------|-------|-------|------|-------|------|
| Q9BYH1 | Seizure 6-like protein OS=Homo sapiens GN=SEZ6L PE=1 SV=1 - [SE6L1_HUMAN]                                 | 0.78  | 1 | 1  | 1  | 1  |      |      |      |      |      |      |      | 4.44 | 3.34 | 4.45  | 3.35  | 1024 | 111.7 | 4.78 |
| Q13228 | Selenium-binding protein 1 OS=Homo sapiens GN=SELENBP1 PE=1 SV=2 - [SBP1_HUMAN]                           | 6.14  | 1 | 2  | 2  | 6  | 0.90 | 0.76 | 0.92 | 0.79 | 0.49 | 0.60 | 0.58 | 0.71 | 472  | 52.4  | 6.37  |      |       |      |
| Q96T21 | Selenocysteine insertion sequence-binding protein 2 OS=Homo sapiens GN=SECISBP2 PE=1 SV=2 - [SEBP2_HUMAN] | 1.05  | 1 | 1  | 1  | 2  |      |      |      |      | 1.15 | 1.07 | 0.97 | 0.90 | 854  | 95.4  | 8.12  |      |       |      |
| Q96I15 | Selenocysteine lyase OS=Homo sapiens GN=SCLY PE=1 SV=2 - [SCLY_HUMAN]                                     | 11.69 | 1 | 2  | 2  | 2  | 1.00 | 0.87 | 0.98 | 0.85 |      |      |      |      | 445  | 48.1  | 7.12  |      |       |      |
| P57772 | Selenocysteine-specific elongation factor OS=Homo sapiens GN=EEFSEC PE=1 SV=4 - [SELB_HUMAN]              | 1.01  | 1 | 1  | 1  | 1  |      |      |      |      | 0.91 | 1.16 | 0.72 | 0.92 | 596  | 65.3  | 8.35  |      |       |      |
| Q9NZV5 | Selenoprotein N OS=Homo sapiens GN=SEPN1 PE=1 SV=5 - [SELN_HUMAN]                                         | 2.54  | 1 | 3  | 3  | 4  | 1.02 | 1.32 | 1.10 | 1.42 | 0.81 | 0.77 | 0.41 | 0.52 | 590  | 65.8  | 5.48  |      |       |      |
| P49908 | Selenoprotein P OS=Homo sapiens GN=SEPP1 PE=1 SV=3 - [SEPP1_HUMAN]                                        | 19.16 | 1 | 10 | 10 | 96 | 0.95 | 0.96 | 0.93 | 0.94 | 0.86 | 0.85 | 0.86 | 0.85 | 381  | 43.2  | 7.87  |      |       |      |
| P63302 | Selenoprotein W OS=Homo sapiens GN=SEPW1 PE=1 SV=3 - [SELW_HUMAN]                                         | 12.64 | 1 | 1  | 1  | 2  |      |      |      |      | 1.02 | 0.90 | 1.17 | 1.04 | 87   | 9.4   | 9.23  |      |       |      |
| Q9NS98 | Semaphorin-3G OS=Homo sapiens GN=SEMA3G PE=1 SV=1 - [SEM3G_HUMAN]                                         | 3.71  | 1 | 2  | 2  | 4  | 0.85 | 0.83 | 0.97 | 0.95 |      |      |      |      | 782  | 86.6  | 7.78  |      |       |      |
| Q9NPR2 | Semaphorin-4B OS=Homo sapiens GN=SEMA4B PE=1 SV=3 [SEM4B_HUMAN]                                           | 4.09  | 1 | 2  | 2  | 2  | 0.92 | 0.95 | 0.98 | 1.03 | 1.29 | 1.35 | 1.59 | 1.68 | 832  | 92.1  | 6.95  |      |       |      |
| Q92854 | Semaphorin-4D OS=Homo sapiens GN=SEMA4D PE=1 SV=1 - [SEM4D_HUMAN]                                         | 1.97  | 1 | 1  | 1  | 3  | 1.06 | 0.83 | 1.21 | 0.95 | 1.14 | 1.02 | 1.15 | 1.04 | 862  | 96.1  | 7.96  |      |       |      |
| Q13591 | Semaphorin-5A OS=Homo sapiens GN=SEMA5A PE=1 SV=3 - [SEM5A_HUMAN]                                         | 3.54  | 1 | 2  | 2  | 3  |      |      |      |      | 0.08 | 0.04 | 0.42 | 0.39 | 1074 | 120.5 | 7.21  |      |       |      |
| Q9H3T3 | Semaphorin-6B OS=Homo sapiens GN=SEMA6B PE=1 SV=4 [SEM6B_HUMAN]                                           | 2.25  | 1 | 2  | 2  | 2  | 0.85 | 0.68 | 0.86 | 0.69 | 0.75 | 0.93 | 0.72 | 0.90 | 888  | 95.2  | 8.48  |      |       |      |
| Q9BQF6 | Sentrin-specific protease 7 OS=Homo sapiens GN=SENP7 PE=1 SV=4 - [SENP7_HUMAN]                            | 2.00  | 1 | 1  | 1  | 1  | 0.28 | 0.45 | 0.21 | 0.34 |      |      |      |      | 1050 | 119.6 | 6.61  |      |       |      |
| Q14674 | Separin OS=Homo sapiens GN=ESPL1 PE=1 SV=3 - [ESPL1_HUMAN]                                                | 0.75  | 1 | 1  | 1  | 1  | 1.27 | 0.64 | 1.15 | 0.59 |      |      |      |      | 2120 | 233.0 | 7.55  |      |       |      |
| Q9NVA2 | Septin-11 OS=Homo sapiens GN=SEPT11 PE=1 SV=3 - [SEPT11_HUMAN]                                            | 6.06  | 1 | 3  | 3  | 7  |      |      |      |      | 1.12 | 1.06 | 1.05 | 0.99 | 429  | 49.4  | 6.81  |      |       |      |
| Q14141 | Septin-6 OS=Homo sapiens GN=SEPT6 PE=1 SV=4 - [SEPT6_HUMAN]                                               | 2.30  | 1 | 1  | 1  | 3  |      |      |      |      | 1.91 | 1.66 | 1.63 | 1.42 | 434  | 49.7  | 6.67  |      |       |      |
| Q16181 | Septin-7 OS=Homo sapiens GN=SEPT7 PE=1 SV=2 - [SEPT7_HUMAN]                                               | 6.18  | 1 | 2  | 2  | 3  | 1.19 | 1.49 | 1.04 | 1.32 | 1.51 | 1.53 | 1.45 | 1.47 | 437  | 50.6  | 8.63  |      |       |      |
| P10124 | Serglycin OS=Homo sapiens GN=SRGN PE=1 SV=3 - [SRGN_HUMAN]                                                | 20.89 | 1 | 3  | 3  | 36 | 0.92 | 0.89 | 0.92 | 0.75 | 2.23 | 1.89 | 2.22 | 1.99 | 158  | 17.6  | 4.96  |      |       |      |
| O15269 | Serine palmitoyltransferase 1 OS=Homo sapiens GN=SPTLC1 PE=1 SV=1 - [SPTC1_HUMAN]                         | 4.65  | 1 | 1  | 1  | 1  | 0.70 | 0.86 | 0.68 | 0.83 |      |      |      |      | 473  | 52.7  | 6.01  |      |       |      |
| Q9NUV7 | Serine palmitoyltransferase 3 OS=Homo sapiens GN=SPTLC3 PE=1 SV=3 - [SPTC3_HUMAN]                         | 1.99  | 1 | 1  | 1  | 1  | 0.68 | 0.60 |      |      |      |      |      |      | 552  | 62.0  | 8.78  |      |       |      |
| Q6UWY2 | Serine protease 57 OS=Homo sapiens GN=PRSS57 PE=2 SV=2 - [PRS57_HUMAN]                                    | 6.71  | 1 | 1  | 1  | 1  |      |      |      |      | 0.43 | 0.21 | 0.36 | 0.17 | 283  | 30.3  | 9.32  |      |       |      |
| Q92743 | Serine protease HTRA1 OS=Homo sapiens GN=HTRA1 PE=1 SV=1 - [HTRA1_HUMAN]                                  | 7.71  | 1 | 3  | 3  | 5  | 1.20 | 1.13 | 1.25 | 1.18 |      |      |      |      | 480  | 51.3  | 7.83  |      |       |      |
| Q9NQ38 | Serine protease inhibitor Kazal-type 5 OS=Homo sapiens GN=SPINK5 PE=1 SV=2 - [SK5_HUMAN]                  | 6.58  | 1 | 5  | 5  | 11 |      |      |      |      | 1.44 | 0.91 | 1.40 | 0.92 | 1064 | 120.6 | 8.06  |      |       |      |
| Q9NP81 | Serine--tRNA ligase, mitochondrial OS=Homo sapiens GN=SARS2 PE=1 SV=1 - [SYSM_HUMAN]                      | 4.25  | 3 | 1  | 2  | 2  | 1.24 | 1.14 | 1.22 | 1.12 |      |      |      |      | 518  | 58.2  | 8.13  |      |       |      |
| Q9Y3F4 | Serine-threonine kinase receptor-associated protein OS=Homo sapiens GN=STRAP PE=1 SV=1 - [STRAP_HUMAN]    | 2.86  | 1 | 1  | 1  | 4  | 0.76 | 0.62 | 0.82 | 0.68 | 0.84 | 0.92 | 0.77 | 0.84 | 350  | 38.4  | 5.12  |      |       |      |
| Q9UQ35 | Serine/arginine repetitive matrix protein 2 OS=Homo sapiens GN=SRRM2 PE=1 SV=2 - [SRRM2_HUMAN]            | 0.62  | 1 | 1  | 1  | 2  | 1.08 | 1.05 | 1.14 | 1.11 | 0.99 | 1.08 | 0.86 | 0.94 | 2752 | 299.4 | 12.06 |      |       |      |



|        |                                                                                                     |      |   |   |   |    |      |      |      |      |      |      |      |      |      |       |       |
|--------|-----------------------------------------------------------------------------------------------------|------|---|---|---|----|------|------|------|------|------|------|------|------|------|-------|-------|
| Q96IZ7 | Serine/Arginine-related protein 53 OS=Homo sapiens<br>GN=RSRC1 PE=1 SV=1 - [RSRC1_HUMAN]            | 3.59 | 1 | 1 | 1 | 3  | 0.88 | 0.56 | 0.79 | 0.50 | 0.81 | 0.63 | 0.89 | 0.69 | 334  | 38.7  | 11.08 |
| O94804 | Serine/threonine-protein kinase 10 OS=Homo sapiens<br>GN=STK10 PE=1 SV=1 - [STK10_HUMAN]            | 2.89 | 1 | 2 | 2 | 2  |      |      |      |      | 1.04 | 1.12 | 0.95 | 1.03 | 968  | 112.1 | 6.95  |
| Q9BXU1 | Serine/threonine-protein kinase 31 OS=Homo sapiens<br>GN=STK31 PE=2 SV=2 - [STK31_HUMAN]            | 2.65 | 1 | 1 | 2 | 2  | 0.06 | 0.03 | 0.04 | 0.02 |      |      |      |      | 1019 | 115.6 | 5.14  |
| Q9BYT3 | Serine/threonine-protein kinase 33 OS=Homo sapiens<br>GN=STK33 PE=1 SV=1 - [STK33_HUMAN]            | 7.20 | 1 | 1 | 1 | 2  | 0.91 | 0.73 | 1.10 | 0.89 |      |      |      |      | 514  | 57.8  | 7.03  |
| Q8TDR2 | Serine/threonine-protein kinase 35 OS=Homo sapiens<br>GN=STK35 PE=1 SV=2 - [STK35_HUMAN]            | 7.87 | 1 | 2 | 3 | 10 | 1.06 | 1.17 | 0.84 | 0.93 | 1.06 | 0.79 | 1.22 | 0.86 | 534  | 58.0  | 9.74  |
| Q15208 | Serine/threonine-protein kinase 38 OS=Homo sapiens<br>GN=STK38 PE=1 SV=1 - [STK38_HUMAN]            | 2.80 | 1 | 1 | 1 | 1  | 0.80 | 0.76 | 0.97 | 0.92 |      |      |      |      | 465  | 54.2  | 7.15  |
| Q13535 | Serine/threonine-protein kinase ATR OS=Homo sapiens<br>GN=ATR PE=1 SV=3 - [ATR_HUMAN]               | 2.19 | 1 | 3 | 3 | 3  |      |      |      |      | 0.96 | 0.94 | 0.84 | 0.94 | 2644 | 301.2 | 7.43  |
| O14757 | Serine/threonine-protein kinase Chk1 OS=Homo sapiens<br>GN=CHK1 PE=1 SV=2 - [CHK1_HUMAN]            | 1.26 | 1 | 1 | 1 | 1  |      |      |      |      | 0.92 | 0.54 | 0.74 | 0.44 | 476  | 54.4  | 8.25  |
| Q96GX5 | Serine/threonine-protein kinase greatwall OS=Homo sapiens<br>GN=MASTL PE=1 SV=1 - [GWL_HUMAN]       | 3.07 | 1 | 2 | 2 | 2  | 0.78 | 0.84 | 0.80 | 0.87 | 0.84 | 1.06 | 0.49 | 0.62 | 879  | 97.3  | 5.99  |
| Q96QS6 | Serine/threonine-protein kinase H2 OS=Homo sapiens<br>GN=PSKH2 PE=2 SV=1 - [KPSH2_HUMAN]            | 2.60 | 1 | 1 | 1 | 1  |      |      |      |      | 0.86 | 0.61 | 1.07 | 0.76 | 385  | 43.0  | 9.63  |
| Q9UPZ9 | Serine/threonine-protein kinase ICK OS=Homo sapiens<br>GN=ICK PE=1 SV=1 - [ICK_HUMAN]               | 1.42 | 1 | 1 | 1 | 1  | 1.32 | 1.41 | 1.34 | 1.44 |      |      |      |      | 632  | 71.4  | 9.77  |
| O95835 | Serine/threonine-protein kinase LATS1 OS=Homo sapiens<br>GN=LATS1 PE=1 SV=1 - [LATS1_HUMAN]         | 2.92 | 1 | 1 | 1 | 1  |      |      |      |      | 0.49 | 0.63 | 0.59 | 0.75 | 1130 | 126.8 | 8.70  |
| Q96Q04 | Serine/threonine-protein kinase LMTK3 OS=Homo sapiens<br>GN=LMTK3 PE=2 SV=2 - [LMTK3_HUMAN]         | 2.26 | 1 | 1 | 1 | 1  | 1.21 | 1.07 | 1.21 | 1.08 |      |      |      |      | 1460 | 153.6 | 4.86  |
| Q5VT25 | Serine/threonine-protein kinase MRCK alpha OS=Homo sapiens<br>GN=CDC42BPA PE=1 SV=1 - [MRCKA_HUMAN] | 1.15 | 1 | 2 | 2 | 2  | 0.56 | 0.67 | 0.42 | 0.50 | 1.68 | 1.64 | 1.58 | 1.55 | 1732 | 197.2 | 6.58  |
| Q9Y5S2 | Serine/threonine-protein kinase MRCK beta OS=Homo sapiens<br>GN=CDC42BPB PE=1 SV=2 - [MRCKB_HUMAN]  | 1.52 | 1 | 2 | 2 | 6  | 0.97 | 0.73 | 1.31 | 0.98 | 1.32 | 1.50 | 1.35 | 1.54 | 1711 | 194.2 | 6.37  |
| Q9P289 | Serine/threonine-protein kinase MST4 OS=Homo sapiens<br>GN=MST4 PE=1 SV=2 - [MST4_HUMAN]            | 2.40 | 1 | 1 | 1 | 1  |      |      |      |      | 0.91 | 0.86 | 0.66 | 0.62 | 416  | 46.5  | 5.29  |
| Q16512 | Serine/threonine-protein kinase N1 OS=Homo sapiens<br>GN=PKN1 PE=1 SV=2 - [PKN1_HUMAN]              | 1.91 | 3 | 1 | 2 | 3  | 1.51 | 1.93 | 1.42 | 1.82 |      |      |      |      | 942  | 103.9 | 6.37  |
| Q96PY6 | Serine/threonine-protein kinase Nek1 OS=Homo sapiens<br>GN=NEK1 PE=1 SV=2 - [NEK1_HUMAN]            | 1.75 | 1 | 1 | 2 | 4  | 0.93 | 0.81 | 1.12 | 0.98 |      |      |      |      | 1258 | 142.7 | 5.94  |
| P51956 | Serine/threonine-protein kinase Nek3 OS=Homo sapiens<br>GN=NEK3 PE=1 SV=2 - [NEK3_HUMAN]            | 6.92 | 1 | 2 | 3 | 5  | 0.43 | 0.40 | 0.66 | 0.62 | 0.88 | 0.92 | 0.88 | 0.93 | 506  | 57.7  | 7.17  |
| Q9HC98 | Serine/threonine-protein kinase Nek6 OS=Homo sapiens<br>GN=NEK6 PE=1 SV=2 - [NEK6_HUMAN]            | 5.75 | 2 | 2 | 2 | 2  | 0.70 | 0.46 | 0.84 | 0.53 |      |      |      |      | 313  | 35.7  | 8.03  |
| Q9UBE8 | Serine/threonine-protein kinase NLK OS=Homo sapiens<br>GN=NLK PE=1 SV=2 - [NLK_HUMAN]               | 2.28 | 1 | 1 | 1 | 1  |      |      |      |      | 0.28 | 0.23 |      |      | 527  | 58.2  | 8.13  |
| O95747 | Serine/threonine-protein kinase OSR1 OS=Homo sapiens<br>GN=OSR1 PE=1 SV=1 - [OSR1_HUMAN]            | 7.40 | 1 | 2 | 2 | 5  |      |      |      |      | 1.06 | 1.28 | 1.02 | 1.23 | 527  | 58.0  | 6.43  |
| O75914 | Serine/threonine-protein kinase PAK 3 OS=Homo sapiens<br>GN=PAK3 PE=1 SV=2 - [PAK3_HUMAN]           | 4.47 | 1 | 1 | 1 | 1  |      |      |      |      | 0.65 |      | 0.75 |      | 559  | 62.3  | 5.45  |
| P53350 | Serine/threonine-protein kinase PLK1 OS=Homo sapiens<br>GN=PLK1 PE=1 SV=1 - [PLK1_HUMAN]            | 3.98 | 1 | 2 | 2 | 2  | 1.01 | 1.02 | 0.98 | 1.00 |      |      |      |      | 603  | 68.2  | 8.91  |
| O14730 | Serine/threonine-protein kinase RIO3 OS=Homo sapiens<br>GN=RIOK3 PE=1 SV=2 - [RIOK3_HUMAN]          | 4.43 | 1 | 1 | 1 | 1  | 4.89 | 1.74 | 1.41 | 0.51 |      |      |      |      | 519  | 59.1  | 5.76  |
| Q9Y2K2 | Serine/threonine-protein kinase SIK3 OS=Homo sapiens<br>GN=SIK3 PE=1 SV=3 - [SIK3_HUMAN]            | 2.85 | 1 | 2 | 2 | 3  | 0.85 | 0.95 | 1.18 | 1.10 |      |      |      |      | 1263 | 139.9 | 6.70  |
| Q96Q15 | Serine/threonine-protein kinase SMG1 OS=Homo sapiens<br>GN=SMG1 PE=1 SV=3 - [SMG1_HUMAN]            | 0.68 | 3 | 1 | 2 | 2  | 0.98 | 0.91 | 0.91 | 0.86 |      |      |      |      | 3661 | 410.2 | 6.46  |

|        |                                                                                                                                       |       |   |    |    |       |      |      |      |      |      |      |      |      |      |       |      |      |      |      |       |      |
|--------|---------------------------------------------------------------------------------------------------------------------------------------|-------|---|----|----|-------|------|------|------|------|------|------|------|------|------|-------|------|------|------|------|-------|------|
| Q7L7X3 | Serine/threonine-protein kinase TAO1 OS=Homo sapiens GN=TAOK1 PE=1 SV=1 - [TAOK1_HUMAN]                                               | 2.40  | 1 | 1  | 1  | 1     |      |      |      |      |      |      |      |      |      |       |      | 0.43 | 0.24 | 1001 | 116.0 | 7.65 |
| Q9UL54 | Serine/threonine-protein kinase TAO2 OS=Homo sapiens GN=TAOK2 PE=1 SV=2 - [TAOK2_HUMAN]                                               | 1.94  | 1 | 1  | 1  | 1     | 1.20 | 1.17 | 1.34 | 1.31 |      |      |      |      |      |       |      |      |      | 1235 | 138.2 | 7.27 |
| O75385 | Serine/threonine-protein kinase ULK1 OS=Homo sapiens GN=ULK1 PE=1 SV=2 - [ULK1_HUMAN]                                                 | 4.19  | 1 | 2  | 2  | 3     | 0.79 | 0.90 | 0.79 | 0.90 | 0.84 | 0.87 | 0.76 | 0.78 | 1050 | 112.6 | 8.79 |      |      |      |       |      |
| Q8IYT8 | Serine/threonine-protein kinase ULK2 OS=Homo sapiens GN=ULK2 PE=1 SV=3 - [ULK2_HUMAN]                                                 | 5.98  | 1 | 4  | 4  | 17    | 0.97 | 0.91 | 1.03 | 0.95 | 1.10 | 1.30 | 0.85 | 1.00 | 1036 | 112.6 | 8.53 |      |      |      |       |      |
| Q96C45 | Serine/threonine-protein kinase ULK4 OS=Homo sapiens GN=ULK4 PE=2 SV=2 - [ULK4_HUMAN]                                                 | 0.78  | 1 | 1  | 1  | 2     | 1.07 | 1.35 | 1.05 | 1.33 |      |      |      |      | 1275 | 142.4 | 6.29 |      |      |      |       |      |
| Q9H4A3 | Serine/threonine-protein kinase WNK1 OS=Homo sapiens GN=WNK1 PE=1 SV=2 - [WNK1_HUMAN]                                                 | 1.64  | 1 | 2  | 3  | 5     |      |      |      |      | 1.82 | 1.16 | 1.40 | 1.22 | 2382 | 250.6 | 6.34 |      |      |      |       |      |
| Q9BYP7 | Serine/threonine-protein kinase WNK3 OS=Homo sapiens GN=WNK3 PE=1 SV=3 - [WNK3_HUMAN]                                                 | 1.33  | 1 | 2  | 2  | 14    | 1.26 | 1.17 | 1.32 | 1.23 | 0.47 | 0.77 | 0.75 | 1.23 | 1800 | 198.3 | 6.07 |      |      |      |       |      |
| Q14738 | Serine/threonine-protein phosphatase 2A 56 kDa regulatory subunit delta isoform OS=Homo sapiens GN=PPP2R5D PE=1 SV=1 - [2A5D_HUMAN]   | 2.16  | 1 | 1  | 1  | 1     | 1.14 | 1.14 | 0.85 | 0.86 |      |      |      |      | 602  | 69.9  | 8.13 |      |      |      |       |      |
| Q16537 | Serine/threonine-protein phosphatase 2A 56 kDa regulatory subunit epsilon isoform OS=Homo sapiens GN=PPP2R5E PE=1 SV=1 - [2A5E_HUMAN] | 3.00  | 1 | 1  | 1  | 1     | 0.95 | 0.89 | 0.77 | 0.73 |      |      |      |      | 467  | 54.7  | 6.95 |      |      |      |       |      |
| Q13362 | Serine/threonine-protein phosphatase 2A 56 kDa regulatory subunit gamma isoform OS=Homo sapiens GN=PPP2R5C PE=1 SV=3 - [2A5G_HUMAN]   | 1.72  | 1 | 1  | 1  | 1     | 1.45 | 1.62 | 1.45 | 1.63 |      |      |      |      | 524  | 61.0  | 6.87 |      |      |      |       |      |
| P30153 | Serine/threonine-protein phosphatase 2A 65 kDa regulatory subunit A alpha isoform OS=Homo sapiens GN=PPP2R1A PE=1 SV=4 - [2AAA_HUMAN] | 8.15  | 2 | 4  | 4  | 5     | 0.71 | 0.82 | 0.66 | 0.76 |      |      |      |      | 589  | 65.3  | 5.11 |      |      |      |       |      |
| Q06190 | Serine/threonine-protein phosphatase 2A regulatory subunit B" subunit alpha OS=Homo sapiens GN=PPP2R3A PE=1 SV=1 - [P2R3A_HUMAN]      | 4.26  | 1 | 2  | 2  | 5     |      |      |      |      | 0.66 | 0.30 | 0.99 | 0.45 | 1150 | 130.2 | 5.21 |      |      |      |       |      |
| Q9NY27 | Serine/threonine-protein phosphatase 4 regulatory subunit 2 OS=Homo sapiens GN=PPP4R2 PE=1 SV=3 - [PP4R2_HUMAN]                       | 4.32  | 1 | 1  | 1  | 1     | 1.10 | 1.06 | 1.15 | 1.10 |      |      |      |      | 417  | 46.9  | 4.54 |      |      |      |       |      |
| Q6IN85 | Serine/threonine-protein phosphatase 4 regulatory subunit 3A OS=Homo sapiens GN=SMEK1 PE=1 SV=1 - [P4R3A_HUMAN]                       | 1.92  | 1 | 1  | 1  | 1     |      |      |      |      | 0.71 | 0.75 | 0.84 | 0.88 | 833  | 95.3  | 4.94 |      |      |      |       |      |
| O15084 | Serine/threonine-protein phosphatase 6 regulatory ankyrin repeat subunit A OS=Homo sapiens GN=ANKRD28 PE=1 SV=5 - [ANR28_HUMAN]       | 4.56  | 1 | 1  | 2  | 6     | 1.21 | 0.70 | 1.00 | 0.64 |      |      |      |      | 1053 | 112.9 | 6.25 |      |      |      |       |      |
| Q8NB46 | Serine/threonine-protein phosphatase 6 regulatory ankyrin repeat subunit C OS=Homo sapiens GN=ANKRD52 PE=1 SV=3 - [ANR52_HUMAN]       | 1.12  | 1 | 1  | 1  | 1     |      |      |      |      | 1.72 | 1.18 | 1.91 | 1.31 | 1076 | 115.0 | 6.48 |      |      |      |       |      |
| Q9UPN7 | Serine/threonine-protein phosphatase 6 regulatory subunit 1 OS=Homo sapiens GN=PPP6R1 PE=1 SV=5 - [PP6R1_HUMAN]                       | 2.04  | 1 | 1  | 1  | 1     |      |      |      |      | 0.84 | 1.20 | 0.77 | 1.09 | 881  | 96.7  | 4.55 |      |      |      |       |      |
| O75170 | Serine/threonine-protein phosphatase 6 regulatory subunit 2 OS=Homo sapiens GN=PPP6R2 PE=1 SV=2 - [PP6R2_HUMAN]                       | 1.97  | 1 | 1  | 1  | 1     | 1.09 | 0.85 | 1.12 | 0.87 |      |      |      |      | 966  | 104.9 | 4.87 |      |      |      |       |      |
| Q5H9R7 | Serine/threonine-protein phosphatase 6 regulatory subunit 3 OS=Homo sapiens GN=PPP6R3 PE=1 SV=2 - [PP6R3_HUMAN]                       | 1.83  | 1 | 1  | 1  | 1     |      |      |      |      | 0.25 | 0.12 | 0.73 | 0.36 | 873  | 97.6  | 4.60 |      |      |      |       |      |
| P36873 | Serine/threonine-protein phosphatase PP1-gamma catalytic subunit OS=Homo sapiens GN=PPP1CC PE=1 SV=1 - [PP1G_HUMAN]                   | 4.33  | 3 | 1  | 1  | 3     | 1.21 | 1.62 | 2.41 | 3.23 | 1.24 | 1.11 | 1.26 | 1.12 | 323  | 37.0  | 6.54 |      |      |      |       |      |
| Q86SQ7 | Serologically defined colon cancer antigen 8 OS=Homo sapiens GN=SDCCAG8 PE=1 SV=1 - [SDCG8_HUMAN]                                     | 1.40  | 1 | 1  | 1  | 2     | 0.71 | 0.63 | 0.73 | 0.65 | 0.69 | 0.62 | 0.70 | 0.64 | 713  | 82.6  | 5.81 |      |      |      |       |      |
| P02787 | Serotransferrin OS=Homo sapiens GN=TF PE=1 SV=3 - [TRFE_HUMAN]                                                                        | 83.09 | 4 | 95 | 99 | 17041 | 1.24 | 1.19 | 1.24 | 1.19 | 1.03 | 1.02 | 1.01 | 1.03 | 698  | 77.0  | 7.12 |      |      |      |       |      |
| Q86U17 | Serpin A11 OS=Homo sapiens GN=SERPINA11 PE=2 SV=2 - [SPA11_HUMAN]                                                                     | 20.85 | 1 | 8  | 8  | 22    | 1.10 | 1.03 | 1.11 | 1.04 | 0.90 | 0.72 | 0.92 | 0.73 | 422  | 47.0  | 7.68 |      |      |      |       |      |
| P48595 | Serpin B10 OS=Homo sapiens GN=SERPINB10 PE=1 SV=1 - [SPB10_HUMAN]                                                                     | 11.08 | 1 | 3  | 3  | 3     | 1.00 | 1.00 | 1.09 | 1.10 | 0.51 | 0.45 | 1.04 | 0.84 | 397  | 45.4  | 6.16 |      |      |      |       |      |
| Q96P63 | Serpin B12 OS=Homo sapiens GN=SERPINB12 PE=1 SV=1 - [SPB12_HUMAN]                                                                     | 8.64  | 1 | 1  | 2  | 8     | 1.03 | 0.86 | 0.78 | 0.65 | 1.00 | 0.83 | 1.36 | 1.44 | 405  | 46.2  | 5.53 |      |      |      |       |      |
| Q9UIV8 | Serpin B13 OS=Homo sapiens GN=SERPINB13 PE=2 SV=2 - [SPB13_HUMAN]                                                                     | 5.88  | 1 | 2  | 2  | 3     | 0.59 | 0.61 | 0.54 | 0.56 | 0.63 | 0.87 | 0.58 | 0.80 | 391  | 44.2  | 5.71 |      |      |      |       |      |
| P36952 | Serpin B5 OS=Homo sapiens GN=SERPINB5 PE=1 SV=2 - [SPB5_HUMAN]                                                                        | 4.53  | 1 | 1  | 1  | 1     |      |      |      |      | 1.27 | 1.16 | 1.03 | 0.94 | 375  | 42.1  | 6.05 |      |      |      |       |      |

|        |                                                                                                                  |       |    |     |     |       |      |      |      |      |      |      |      |      |  |  |  |      |      |      |      |     |      |       |      |
|--------|------------------------------------------------------------------------------------------------------------------|-------|----|-----|-----|-------|------|------|------|------|------|------|------|------|--|--|--|------|------|------|------|-----|------|-------|------|
| P35237 | Serpin B6 OS=Homo sapiens GN=SERPINB6 PE=1 SV=3 - [SPB6_HUMAN]                                                   | 11.44 | 1  | 3   | 3   | 6     |      |      |      |      |      |      |      |      |  |  |  | 0.76 | 0.84 | 0.80 | 0.73 | 376 | 42.6 | 5.27  |      |
| P50452 | Serpin B8 OS=Homo sapiens GN=SERPINB8 PE=1 SV=2 - [SPB8_HUMAN]                                                   | 3.48  | 1  | 1   | 1   | 3     |      |      |      |      |      |      |      |      |  |  |  |      |      |      |      | 374 | 42.7 | 5.57  |      |
| O75830 | Serpin I2 OS=Homo sapiens GN=SERPINI2 PE=2 SV=1 - [SPI2_HUMAN]                                                   | 2.22  | 1  | 1   | 1   | 3     | 0.84 | 0.70 | 0.78 | 0.66 |      |      |      |      |  |  |  |      |      |      |      | 405 | 46.1 | 5.16  |      |
| P02768 | Serum albumin OS=Homo sapiens GN=ALB PE=1 SV=2 - [ALBU_HUMAN]                                                    | 96.06 | 10 | 126 | 127 | 99215 | 0.96 | 0.93 | 0.98 | 0.95 | 1.00 | 1.01 | 0.99 | 1.01 |  |  |  |      |      |      |      |     | 609  | 69.3  | 6.28 |
| P02735 | Serum amyloid A protein OS=Homo sapiens GN=SAA1 PE=1 SV=2 - [SAA_HUMAN]                                          | 62.30 | 2  | 9   | 9   | 233   | 0.89 | 0.89 | 0.73 | 0.77 | 0.75 | 0.70 | 0.78 | 0.72 |  |  |  |      |      |      |      |     | 122  | 13.5  | 6.79 |
| P35542 | Serum amyloid A-4 protein OS=Homo sapiens GN=SAA4 PE=1 SV=2 - [SAA4_HUMAN]                                       | 56.92 | 1  | 10  | 10  | 431   | 0.73 | 0.72 | 0.73 | 0.72 | 0.89 | 0.91 | 0.88 | 0.89 |  |  |  |      |      |      |      |     | 130  | 14.7  | 9.07 |
| P02743 | Serum amyloid P-component OS=Homo sapiens GN=APCS PE=1 SV=2 - [SAMP_HUMAN]                                       | 47.53 | 1  | 10  | 10  | 166   | 1.12 | 1.10 | 1.09 | 1.08 | 0.94 | 0.99 | 0.93 | 0.98 |  |  |  |      |      |      |      |     | 223  | 25.4  | 6.54 |
| O95810 | Serum deprivation-response protein OS=Homo sapiens GN=SDPR PE=1 SV=3 - [SDPR_HUMAN]                              | 12.47 | 1  | 5   | 5   | 17    | 0.69 | 0.63 | 0.64 | 0.59 | 1.32 | 1.25 | 1.43 | 1.35 |  |  |  |      |      |      |      |     | 425  | 47.1  | 5.21 |
| P27169 | Serum paraoxonase/arylesterase 1 OS=Homo sapiens GN=PON1 PE=1 SV=3 - [PON1_HUMAN]                                | 64.23 | 2  | 14  | 17  | 992   | 1.16 | 1.14 | 1.15 | 1.14 | 0.99 | 1.08 | 0.92 | 1.04 |  |  |  |      |      |      |      |     | 355  | 39.7  | 5.22 |
| Q15165 | Serum paraoxonase/arylesterase 2 OS=Homo sapiens GN=PON2 PE=1 SV=3 - [PON2_HUMAN]                                | 5.37  | 1  | 1   | 1   | 3     |      |      |      |      |      |      |      |      |  |  |  |      |      |      |      |     | 354  | 39.4  | 5.60 |
| Q15166 | Serum paraoxonase/lactonase 3 OS=Homo sapiens GN=PON3 PE=1 SV=3 - [PON3_HUMAN]                                   | 38.14 | 1  | 7   | 9   | 107   | 1.12 | 1.15 | 1.08 | 1.05 | 0.88 | 0.83 | 1.02 | 1.04 |  |  |  |      |      |      |      |     | 354  | 39.6  | 5.41 |
| Q8NEF9 | Serum response factor-binding protein 1 OS=Homo sapiens GN=SRFBP1 PE=1 SV=1 - [SRFB1_HUMAN]                      | 3.50  | 1  | 1   | 1   | 4     |      |      |      |      |      |      |      |      |  |  |  |      |      |      |      |     | 429  | 48.6  | 9.58 |
| Q9NVD3 | SET domain-containing protein 4 OS=Homo sapiens GN=SETD4 PE=2 SV=1 - [SETD4_HUMAN]                               | 11.82 | 8  | 2   | 3   | 5     |      |      |      |      |      |      |      |      |  |  |  |      |      |      |      |     | 440  | 50.4  | 8.22 |
| Q9UBL3 | Set1/Ash2 histone methyltransferase complex subunit ASH2 OS=Homo sapiens GN=ASH2L PE=1 SV=1 - [ASH2L_HUMAN]      | 0.96  | 1  | 1   | 1   | 1     |      |      |      |      |      |      |      |      |  |  |  |      |      |      |      |     | 628  | 68.7  | 5.69 |
| Q9UN30 | Sex comb on midleg-like protein 1 OS=Homo sapiens GN=SCML1 PE=1 SV=2 - [SCML1_HUMAN]                             | 6.08  | 1  | 1   | 1   | 1     | 0.50 | 1.16 | 0.79 | 1.84 |      |      |      |      |  |  |  |      |      |      |      |     | 329  | 37.4  | 6.89 |
| Q9UQR0 | Sex comb on midleg-like protein 2 OS=Homo sapiens GN=SCML2 PE=1 SV=1 - [SCML2_HUMAN]                             | 6.71  | 1  | 3   | 3   | 3     | 0.98 | 1.03 | 1.02 | 1.07 | 1.09 | 0.82 | 0.96 | 0.72 |  |  |  |      |      |      |      |     | 700  | 77.2  | 8.54 |
| P04278 | Sex hormone-binding globulin OS=Homo sapiens GN=SHBG PE=1 SV=2 - [SHBG_HUMAN]                                    | 60.45 | 1  | 17  | 17  | 228   | 1.83 | 1.90 | 1.72 | 1.80 | 1.38 | 1.50 | 1.36 | 1.48 |  |  |  |      |      |      |      |     | 402  | 43.8  | 6.71 |
| Q9BRG2 | SH2 domain-containing protein 3A OS=Homo sapiens GN=SH2D3A PE=1 SV=1 - [SH23A_HUMAN]                             | 3.30  | 1  | 1   | 1   | 1     |      |      |      |      |      |      |      |      |  |  |  |      |      |      |      |     | 576  | 63.1  | 7.42 |
| Q8N5H7 | SH2 domain-containing protein 3C OS=Homo sapiens GN=SH2D3C PE=1 SV=1 - [SH2D3_HUMAN]                             | 5.12  | 1  | 2   | 2   | 2     | 0.56 | 0.43 | 0.49 | 0.38 |      |      |      |      |  |  |  |      |      |      |      |     | 860  | 94.4  | 8.07 |
| Q9UQQ2 | SH2B adapter protein 3 OS=Homo sapiens GN=SH2B3 PE=2 SV=2 - [SH2B3_HUMAN]                                        | 4.52  | 1  | 1   | 1   | 2     |      |      |      |      |      |      |      |      |  |  |  |      |      |      |      |     | 575  | 63.2  | 7.20 |
| Q9Y566 | SH3 and multiple ankyrin repeat domains protein 1 OS=Homo sapiens GN=SHANK1 PE=1 SV=2 - [SHAN1_HUMAN]            | 0.83  | 1  | 1   | 1   | 46    | 1.12 | 1.18 | 1.14 | 1.23 |      |      |      |      |  |  |  |      |      |      |      |     | 2161 | 224.8 | 8.15 |
| Q9UPX8 | SH3 and multiple ankyrin repeat domains protein 2 OS=Homo sapiens GN=SHANK2 PE=1 SV=3 - [SHAN2_HUMAN]            | 1.84  | 1  | 1   | 1   | 1     | 2.38 | 1.30 | 1.46 | 0.80 |      |      |      |      |  |  |  |      |      |      |      |     | 1470 | 158.7 | 6.90 |
| Q9BYB0 | SH3 and multiple ankyrin repeat domains protein 3 OS=Homo sapiens GN=SHANK3 PE=1 SV=2 - [SHAN3_HUMAN]            | 3.39  | 3  | 2   | 3   | 3     | 0.75 | 0.62 | 0.91 | 0.76 | 0.87 | 1.07 | 0.81 | 1.00 |  |  |  |      |      |      |      |     | 1741 | 186.2 | 9.03 |
| Q8TE82 | SH3 domain and tetratricopeptide repeat-containing protein 1 OS=Homo sapiens GN=SH3TC1 PE=1 SV=3 - [S3TC1_HUMAN] | 0.75  | 1  | 1   | 1   | 1     | 1.30 | 0.93 | 1.24 | 0.89 |      |      |      |      |  |  |  |      |      |      |      |     | 1336 | 146.9 | 6.25 |
| Q9UJC5 | SH3 domain-binding glutamic acid-rich-like protein 2 OS=Homo sapiens GN=SH3BGR2 PE=1 SV=2 - [SH3L2_HUMAN]        | 55.14 | 1  | 4   | 4   | 27    |      |      |      |      |      |      |      |      |  |  |  |      |      |      |      |     | 107  | 12.3  | 6.71 |
| Q9H299 | SH3 domain-binding glutamic acid-rich-like protein 3 OS=Homo sapiens GN=SH3BGR3 PE=1 SV=1 - [SH3L3_HUMAN]        | 31.18 | 1  | 3   | 3   | 24    | 0.85 | 0.84 | 0.87 | 0.87 | 1.17 | 1.11 | 1.36 | 1.30 |  |  |  |      |      |      |      |     | 93   | 10.4  | 4.93 |
| O75368 | SH3 domain-binding glutamic acid-rich-like protein OS=Homo sapiens GN=SH3BGR1 PE=1 SV=1 - [SH3L1_HUMAN]          | 30.70 | 1  | 3   | 3   | 11    |      |      |      |      |      |      |      |      |  |  |  |      |      |      |      |     | 114  | 12.8  | 5.25 |

|        |                                                                                                                  |       |   |   |   |    |      |      |      |      |      |      |      |      |      |       |      |      |
|--------|------------------------------------------------------------------------------------------------------------------|-------|---|---|---|----|------|------|------|------|------|------|------|------|------|-------|------|------|
| Q9Y3L3 | SH3 domain-binding protein 1 OS=Homo sapiens GN=SH3BP1 PE=1 SV=3 - [3BP1_HUMAN]                                  | 3.85  | 1 | 2 | 2 | 2  | 0.86 | 0.99 | 0.99 | 1.15 |      |      |      |      |      | 701   | 75.7 | 6.77 |
| P78314 | SH3 domain-binding protein 2 OS=Homo sapiens GN=SH3BP2 PE=1 SV=2 - [3BP2_HUMAN]                                  | 1.07  | 1 | 1 | 1 | 3  | 1.63 | 1.61 | 1.69 | 1.69 | 1.12 | 1.42 | 1.07 | 1.36 | 561  | 62.2  | 7.78 |      |
| Q9P0V3 | SH3 domain-binding protein 4 OS=Homo sapiens GN=SH3BP4 PE=1 SV=1 - [SH3B4_HUMAN]                                 | 1.45  | 1 | 1 | 1 | 1  |      |      |      |      | 0.86 | 0.62 | 0.73 | 0.52 | 963  | 107.4 | 7.71 |      |
| Q96B97 | SH3 domain-containing kinase-binding protein 1 OS=Homo sapiens GN=SH3KBP1 PE=1 SV=2 - [SH3K1_HUMAN]              | 2.11  | 1 | 1 | 1 | 1  |      |      |      |      | 1.21 | 1.61 | 0.85 | 1.13 | 665  | 73.1  | 6.62 |      |
| Q8TBC3 | SH3KBP1-binding protein 1 OS=Homo sapiens GN=SHKBP1 PE=1 SV=2 - [SHKB1_HUMAN]                                    | 1.13  | 1 | 1 | 1 | 3  |      |      |      |      | 0.70 | 0.45 | 1.02 | 0.66 | 707  | 76.3  | 8.28 |      |
| Q8NEM2 | SHC SH2 domain-binding protein 1 OS=Homo sapiens GN=SHCBP1 PE=1 SV=3 - [SHCBP_HUMAN]                             | 2.98  | 1 | 1 | 1 | 1  | 1.10 | 1.09 | 1.32 | 1.32 |      |      |      |      | 672  | 75.6  | 4.75 |      |
| Q92529 | SHC-transforming protein 3 OS=Homo sapiens GN=SHC3 PE=1 SV=1 - [SHC3_HUMAN]                                      | 3.20  | 1 | 1 | 1 | 1  | 1.58 | 1.65 | 1.73 | 1.80 |      |      |      |      | 594  | 64.0  | 8.32 |      |
| Q6S5L8 | SHC-transforming protein 4 OS=Homo sapiens GN=SHC4 PE=1 SV=1 - [SHC4_HUMAN]                                      | 5.71  | 1 | 2 | 2 | 13 | 1.16 | 1.12 | 1.03 | 1.00 | 1.43 | 1.38 | 1.46 | 1.41 | 630  | 68.7  | 7.84 |      |
| A0MZ66 | Shootin-1 OS=Homo sapiens GN=KIAA1598 PE=1 SV=4 - [SHOT1_HUMAN]                                                  | 1.27  | 1 | 1 | 1 | 1  | 1.07 | 1.27 | 1.08 | 1.29 |      |      |      |      | 631  | 71.6  | 5.33 |      |
| O60902 | Short stature homeobox protein 2 OS=Homo sapiens GN=SHOX2 PE=2 SV=4 - [SHOX2_HUMAN]                              | 11.48 | 1 | 1 | 1 | 1  | 0.23 | 0.46 | 0.21 | 0.41 |      |      |      |      | 331  | 34.9  | 8.82 |      |
| P48995 | Short transient receptor potential channel 1 OS=Homo sapiens GN=TRPC1 PE=1 SV=1 - [TRPC1_HUMAN]                  | 1.77  | 1 | 1 | 1 | 1  |      |      |      |      | 1.01 | 0.99 | 0.99 | 0.97 | 793  | 91.2  | 8.05 |      |
| O75911 | Short-chain dehydrogenase/reductase 3 OS=Homo sapiens GN=DHRS3 PE=1 SV=2 - [DHRS3_HUMAN]                         | 4.30  | 1 | 1 | 1 | 2  |      |      |      |      | 0.62 | 0.68 | 0.79 | 0.87 | 302  | 33.5  | 8.84 |      |
| Q562F6 | Shugoshin-like 2 OS=Homo sapiens GN=SGOL2 PE=1 SV=2 - [SGOL2_HUMAN]                                              | 2.13  | 1 | 1 | 1 | 3  | 1.20 | 1.39 | 1.13 | 1.37 |      |      |      |      | 1265 | 144.6 | 7.91 |      |
| Q9HAT2 | Sialate O-acetyltransferase OS=Homo sapiens GN=SIAE PE=1 SV=1 - [SIAE_HUMAN]                                     | 2.87  | 1 | 1 | 1 | 1  | 1.05 | 1.14 | 0.93 | 1.02 |      |      |      |      | 523  | 58.3  | 7.33 |      |
| Q08ET2 | Sialic acid-binding Ig-like lectin 14 OS=Homo sapiens GN=SIGLEC14 PE=1 SV=1 - [SIG14_HUMAN]                      | 7.32  | 2 | 2 | 2 | 6  | 1.87 | 1.61 | 1.73 | 1.51 | 1.15 | 1.46 | 1.22 | 1.54 | 396  | 43.9  | 7.96 |      |
| A6NMB1 | Sialic acid-binding Ig-like lectin 16 OS=Homo sapiens GN=SIGLEC16 PE=2 SV=3 - [SIG16_HUMAN]                      | 1.46  | 1 | 1 | 1 | 1  |      |      |      |      | 0.78 | 0.69 | 0.68 | 0.60 | 481  | 53.0  | 9.03 |      |
| Q9NYZ4 | Sialic acid-binding Ig-like lectin 8 OS=Homo sapiens GN=SIGLEC8 PE=1 SV=2 - [SIGL8_HUMAN]                        | 7.01  | 1 | 1 | 1 | 1  | 0.16 | 0.17 | 0.26 | 0.27 |      |      |      |      | 499  | 54.0  | 8.09 |      |
| Q5T5P2 | Sickle tail protein homolog OS=Homo sapiens GN=SKT PE=1 SV=2 - [SKT_HUMAN]                                       | 1.18  | 1 | 1 | 1 | 2  | 0.38 | 0.27 | 0.58 | 0.41 |      |      |      |      | 1943 | 214.0 | 7.06 |      |
| Q9NXL6 | SID1 transmembrane family member 1 OS=Homo sapiens GN=SIDT1 PE=2 SV=2 - [SIDT1_HUMAN]                            | 2.06  | 1 | 1 | 1 | 1  |      |      |      |      | 0.67 | 0.79 | 0.57 | 0.68 | 827  | 93.8  | 7.30 |      |
| Q8NBJ9 | SID1 transmembrane family member 2 OS=Homo sapiens GN=SIDT2 PE=1 SV=2 - [SIDT2_HUMAN]                            | 1.80  | 1 | 1 | 1 | 1  |      |      |      |      | 0.85 | 0.60 | 0.79 | 0.56 | 832  | 94.4  | 6.96 |      |
| Q8IUH8 | Signal peptide peptidase-like 2C OS=Homo sapiens GN=SPPL2C PE=1 SV=3 - [SPP2C_HUMAN]                             | 2.19  | 1 | 1 | 1 | 1  | 0.52 | 0.55 | 0.50 | 0.54 |      |      |      |      | 684  | 74.5  | 6.76 |      |
| Q9NQ36 | Signal peptide, CUB and EGF-like domain-containing protein 2 OS=Homo sapiens GN=SCUBE2 PE=2 SV=2 - [SCUB2_HUMAN] | 1.80  | 1 | 1 | 1 | 1  | 1.25 | 1.67 | 1.33 | 1.79 |      |      |      |      | 999  | 109.9 | 6.65 |      |
| Q9UHB9 | Signal recognition particle 68 kDa protein OS=Homo sapiens GN=SRP68 PE=1 SV=2 - [SRP68_HUMAN]                    | 1.91  | 1 | 1 | 1 | 1  |      |      |      |      | 3.24 | 4.42 | 0.83 | 1.13 | 627  | 70.7  | 8.56 |      |
| O76094 | Signal recognition particle 72 kDa protein OS=Homo sapiens GN=SRP72 PE=1 SV=3 - [SRP72_HUMAN]                    | 2.53  | 1 | 1 | 1 | 1  |      |      |      |      | 0.84 | 0.09 | 0.83 | 0.09 | 671  | 74.6  | 9.26 |      |
| P08240 | Signal recognition particle receptor subunit alpha OS=Homo sapiens GN=SRPR PE=1 SV=2 - [SRPR_HUMAN]              | 1.57  | 1 | 1 | 1 | 2  | 1.33 | 1.06 | 1.36 | 1.08 |      |      |      |      | 638  | 69.8  | 8.95 |      |
| P42224 | Signal transducer and activator of transcription 1-alpha/beta OS=Homo sapiens GN=STAT1 PE=1 SV=2 - [STAT1_HUMAN] | 3.20  | 1 | 1 | 2 | 2  | 0.98 | 0.93 | 1.01 | 0.97 |      |      |      |      | 750  | 87.3  | 6.05 |      |
| P52630 | Signal transducer and activator of transcription 2 OS=Homo sapiens GN=STAT2 PE=1 SV=1 - [STAT2_HUMAN]            | 2.70  | 2 | 2 | 2 | 2  | 0.56 | 0.34 | 0.51 | 0.43 |      |      |      |      | 851  | 97.9  | 5.49 |      |

|        |                                                                                                               |       |   |   |   |    |      |      |      |      |      |      |      |      |      |       |       |      |      |      |       |      |
|--------|---------------------------------------------------------------------------------------------------------------|-------|---|---|---|----|------|------|------|------|------|------|------|------|------|-------|-------|------|------|------|-------|------|
| Q14765 | Signal transducer and activator of transcription 4 OS=Homo sapiens GN=STAT4 PE=1 SV=1 - [STAT4_HUMAN]         | 2.94  | 1 | 1 | 1 | 1  |      |      |      |      |      |      |      |      |      | 0.63  | 0.74  | 0.63 | 0.74 | 748  | 85.9  | 6.65 |
| P51692 | Signal transducer and activator of transcription 5B OS=Homo sapiens GN=STAT5B PE=1 SV=2 - [STA5B_HUMAN]       | 4.45  | 1 | 2 | 2 | 4  |      |      |      |      |      |      |      |      |      | 1.97  | 2.05  | 1.65 | 1.71 | 787  | 89.8  | 6.05 |
| Q92783 | Signal transducing adapter molecule 1 OS=Homo sapiens GN=STAM PE=1 SV=3 - [STAM1_HUMAN]                       | 8.52  | 2 | 3 | 3 | 6  |      |      |      |      |      |      |      |      |      | 1.32  | 1.06  | 1.50 | 1.20 | 540  | 59.1  | 4.82 |
| O43166 | Signal-induced proliferation-associated 1-like protein 1 OS=Homo sapiens GN=SIPA1L1 PE=1 SV=4 - [SI1L1_HUMAN] | 1.22  | 1 | 1 | 1 | 1  | 1.07 | 1.14 | 1.07 | 1.14 |      |      |      |      |      |       |       |      |      | 1804 | 199.9 | 8.19 |
| Q9P2F8 | Signal-induced proliferation-associated 1-like protein 2 OS=Homo sapiens GN=SIPA1L2 PE=1 SV=2 - [SI1L2_HUMAN] | 7.72  | 1 | 5 | 5 | 10 | 0.91 | 0.86 | 0.72 | 0.69 | 1.05 | 0.90 | 1.49 | 1.27 | 1722 | 190.3 | 6.77  |      |      |      |       |      |
| Q5TFQ8 | Signal-regulatory protein beta-1 isoform 3 OS=Homo sapiens GN=SIRPB1 PE=1 SV=1 - [SIRBL_HUMAN]                | 5.03  | 2 | 2 | 2 | 8  | 1.19 | 1.17 | 1.21 | 1.19 | 0.81 | 0.86 | 0.72 | 0.77 | 398  | 43.3  | 7.83  |      |      |      |       |      |
| Q9UGK3 | Signal-transducing adaptor protein 2 OS=Homo sapiens GN=STAP2 PE=1 SV=2 - [STAP2_HUMAN]                       | 2.23  | 1 | 1 | 1 | 1  | 0.63 | 0.74 | 0.55 | 0.64 |      |      |      |      | 403  | 44.9  | 8.16  |      |      |      |       |      |
| P81133 | Single-minded homolog 1 OS=Homo sapiens GN=SIM1 PE=2 SV=2 - [SIM1_HUMAN]                                      | 7.96  | 1 | 2 | 2 | 12 | 0.73 | 0.72 | 0.83 | 0.82 |      |      |      |      | 766  | 85.5  | 7.43  |      |      |      |       |      |
| P81877 | Single-stranded DNA-binding protein 2 OS=Homo sapiens GN=SSBP2 PE=1 SV=2 - [SSBP2_HUMAN]                      | 11.36 | 1 | 1 | 1 | 2  | 0.52 | 0.89 | 0.78 | 1.36 |      |      |      |      | 361  | 37.8  | 6.64  |      |      |      |       |      |
| Q9BVC3 | Sister chromatid cohesion protein DCC1 OS=Homo sapiens GN=DSCC1 PE=1 SV=2 - [DCC1_HUMAN]                      | 3.56  | 1 | 1 | 1 | 1  | 1.31 | 1.04 | 1.41 | 1.12 |      |      |      |      | 393  | 44.8  | 5.17  |      |      |      |       |      |
| Q29RF7 | Sister chromatid cohesion protein PDS5 homolog A OS=Homo sapiens GN=PDS5A PE=1 SV=1 - [PDS5A_HUMAN]           | 3.52  | 1 | 2 | 2 | 2  | 0.61 | 0.69 | 0.58 | 0.66 | 1.00 | 0.82 | 1.22 | 0.99 | 1337 | 150.7 | 7.91  |      |      |      |       |      |
| P84550 | SKI family transcriptional corepressor 1 OS=Homo sapiens GN=SKOR1 PE=1 SV=1 - [SKOR1_HUMAN]                   | 2.18  | 1 | 1 | 1 | 6  | 0.60 | 0.62 | 1.23 | 1.29 | 0.92 | 0.96 | 0.89 | 0.93 | 965  | 99.8  | 6.54  |      |      |      |       |      |
| Q2VWA4 | SKI family transcriptional corepressor 2 OS=Homo sapiens GN=SKOR2 PE=1 SV=2 - [SKOR2_HUMAN]                   | 3.00  | 1 | 2 | 2 | 3  |      |      |      |      | 0.91 | 0.47 | 1.03 | 0.45 | 1001 | 104.2 | 6.48  |      |      |      |       |      |
| P12755 | Ski oncogene OS=Homo sapiens GN=SKI PE=1 SV=1 - [SKI_HUMAN]                                                   | 2.20  | 1 | 1 | 1 | 1  |      |      |      |      | 0.70 | 0.47 | 2.48 | 1.66 | 728  | 80.0  | 7.62  |      |      |      |       |      |
| P12757 | Ski-like protein OS=Homo sapiens GN=SKIL PE=1 SV=2 - [SKIL_HUMAN]                                             | 1.90  | 1 | 1 | 1 | 1  |      |      |      |      | 1.03 | 1.04 | 1.08 | 1.09 | 684  | 76.9  | 7.11  |      |      |      |       |      |
| Q5T750 | Skin-specific protein 32 OS=Homo sapiens GN=XP32 PE=1 SV=1 - [XP32_HUMAN]                                     | 3.20  | 1 | 1 | 1 | 3  |      |      |      |      | 1.38 | 1.16 | 1.83 | 1.53 | 250  | 26.2  | 7.97  |      |      |      |       |      |
| Q9P270 | SLAIN motif-containing protein 2 OS=Homo sapiens GN=SLAIN2 PE=1 SV=2 - [SLAI2_HUMAN]                          | 4.30  | 1 | 2 | 2 | 3  | 0.67 | 0.36 | 0.71 | 0.39 | 0.98 | 0.90 | 0.87 | 0.79 | 581  | 62.5  | 9.45  |      |      |      |       |      |
| Q9UIB8 | SLAM family member 5 OS=Homo sapiens GN=CD84 PE=1 SV=1 - [SLAF5_HUMAN]                                        | 6.67  | 1 | 2 | 2 | 6  | 1.12 | 1.22 | 1.12 | 1.23 | 1.03 | 1.02 | 1.01 | 1.00 | 345  | 38.8  | 7.06  |      |      |      |       |      |
| Q96A28 | SLAM family member 9 OS=Homo sapiens GN=SLAMF9 PE=2 SV=2 - [SLAF9_HUMAN]                                      | 10.03 | 1 | 1 | 1 | 1  |      |      |      | 0.45 |      |      |      |      | 289  | 32.4  | 7.65  |      |      |      |       |      |
| Q96PX8 | SLIT and NTRK-like protein 1 OS=Homo sapiens GN=SLITRK1 PE=1 SV=2 - [SLIK1_HUMAN]                             | 1.44  | 1 | 1 | 1 | 3  | 0.69 | 0.70 | 0.66 | 0.68 |      |      |      |      | 696  | 77.7  | 6.44  |      |      |      |       |      |
| Q8IW52 | SLIT and NTRK-like protein 4 OS=Homo sapiens GN=SLITRK4 PE=2 SV=1 - [SLIK4_HUMAN]                             | 5.50  | 1 | 3 | 3 | 3  | 0.88 | 0.91 | 0.89 | 0.94 | 0.75 | 0.16 | 0.86 | 0.18 | 837  | 94.3  | 7.80  |      |      |      |       |      |
| O75093 | Slit homolog 1 protein OS=Homo sapiens GN=SLIT1 PE=2 SV=4 - [SLIT1_HUMAN]                                     | 1.50  | 1 | 1 | 2 | 2  | 1.78 | 1.00 | 2.06 | 1.16 |      |      |      |      | 1534 | 167.8 | 6.57  |      |      |      |       |      |
| O75094 | Slit homolog 3 protein OS=Homo sapiens GN=SLIT3 PE=2 SV=3 - [SLIT3_HUMAN]                                     | 3.74  | 1 | 3 | 3 | 3  | 0.84 | 0.70 | 0.90 | 0.72 |      |      |      |      | 1523 | 167.6 | 7.65  |      |      |      |       |      |
| Q7Z6B7 | SLIT-ROBO Rho GTPase-activating protein 1 OS=Homo sapiens GN=SRGAP1 PE=1 SV=1 - [SRGP1_HUMAN]                 | 7.00  | 1 | 4 | 4 | 4  | 1.18 | 0.99 | 1.16 | 0.98 | 0.69 | 0.54 | 0.63 | 0.51 | 1085 | 124.2 | 6.83  |      |      |      |       |      |
| O75044 | SLIT-ROBO Rho GTPase-activating protein 2 OS=Homo sapiens GN=SRGAP2 PE=1 SV=2 - [FNBP2_HUMAN]                 | 2.05  | 1 | 1 | 1 | 1  | 0.71 | 0.68 | 0.61 | 0.59 |      |      |      |      | 1071 | 120.8 | 6.70  |      |      |      |       |      |
| O43147 | Small G protein signaling modulator 2 OS=Homo sapiens GN=SGSM2 PE=1 SV=4 - [SGSM2_HUMAN]                      | 1.29  | 1 | 1 | 1 | 20 | 0.88 | 0.97 | 0.90 | 1.01 | 0.94 | 0.97 | 0.95 | 0.98 | 1006 | 113.2 | 6.67  |      |      |      |       |      |
| P62314 | Small nuclear ribonucleoprotein Sm D1 OS=Homo sapiens GN=SNRPD1 PE=1 SV=1 - [SMD1_HUMAN]                      | 12.61 | 1 | 1 | 1 | 1  |      |      |      |      | 0.59 | 0.66 | 1.32 | 1.49 | 119  | 13.3  | 11.56 |      |      |      |       |      |

|        |                                                                                                           |       |   |   |   |    |      |      |      |      |      |       |       |      |      |       |      |
|--------|-----------------------------------------------------------------------------------------------------------|-------|---|---|---|----|------|------|------|------|------|-------|-------|------|------|-------|------|
| Q96P11 | Small proline-rich protein 4 OS=Homo sapiens GN=SPRR4 PE=2 SV=1 - [SPRR4_HUMAN]                           | 21.52 | 1 | 1 | 1 | 1  | 0.79 | 0.69 | 0.74 | 0.65 | 79   | 8.8   | 9.66  |      |      |       |      |
| Q5T8I9 | Small RNA 2'-O-methyltransferase OS=Homo sapiens GN=HENMT1 PE=2 SV=1 - [HENMT_HUMAN]                      | 3.31  | 1 | 1 | 1 | 1  | 1.02 | 0.94 | 1.11 | 1.04 | 393  | 44.5  | 5.29  |      |      |       |      |
| O75691 | Small subunit processome component 20 homolog OS=Homo sapiens GN=UTP20 PE=1 SV=3 - [UTP20_HUMAN]          | 2.98  | 1 | 4 | 4 | 5  | 0.58 | 0.47 | 0.63 | 0.51 | 2785 | 318.2 | 7.39  |      |      |       |      |
| P61956 | Small ubiquitin-related modifier 2 OS=Homo sapiens GN=SUMO2 PE=1 SV=3 - [SUMO2_HUMAN]                     | 12.63 | 3 | 1 | 1 | 4  |      | 0.94 | 1.03 | 1.04 | 1.14 | 95    | 10.9  | 5.50 |      |       |      |
| P53814 | Smoothelin OS=Homo sapiens GN=SMTN PE=1 SV=7 - [SMTN_HUMAN]                                               | 1.74  | 1 | 1 | 1 | 1  |      | 0.85 | 0.95 | 0.80 | 0.89 | 917   | 99.0  | 9.07 |      |       |      |
| Q99835 | Smoothened homolog OS=Homo sapiens GN=SMO PE=1 SV=1 - [SMO_HUMAN]                                         | 3.18  | 1 | 2 | 2 | 3  | 1.63 | 1.47 | 1.04 | 0.95 | 0.78 | 0.57  | 0.83  | 0.61 | 787  | 86.3  | 8.34 |
| Q8NCG7 | Sn1-specific diacylglycerol lipase beta OS=Homo sapiens GN=DAGLB PE=1 SV=2 - [DAGLB_HUMAN]                | 2.53  | 1 | 1 | 1 | 1  | 1.72 | 1.20 | 1.29 | 0.90 |      |       |       |      | 672  | 73.7  | 6.55 |
| Q8NBS3 | Sodium bicarbonate transporter-like protein 11 OS=Homo sapiens GN=SLC4A11 PE=1 SV=2 - [S4A11_HUMAN]       | 1.23  | 1 | 1 | 1 | 1  |      | 0.93 | 0.94 | 0.92 | 0.93 | 891   | 99.5  | 7.68 |      |       |      |
| Q96NL6 | Sodium channel and clathrin linker 1 OS=Homo sapiens GN=SCLT1 PE=1 SV=2 - [SCLT1_HUMAN]                   | 3.34  | 1 | 2 | 2 | 4  | 0.76 | 0.75 | 0.71 | 0.71 |      |       |       |      | 688  | 80.9  | 6.07 |
| Q9NY46 | Sodium channel protein type 3 subunit alpha OS=Homo sapiens GN=SCN3A PE=1 SV=2 - [SCN3A_HUMAN]            | 0.75  | 1 | 1 | 1 | 1  |      | 1.08 | 1.36 | 0.89 | 1.12 | 2000  | 226.1 | 5.80 |      |       |      |
| P35499 | Sodium channel protein type 4 subunit alpha OS=Homo sapiens GN=SCN4A PE=1 SV=4 - [SCN4A_HUMAN]            | 0.76  | 1 | 1 | 1 | 1  | 1.37 | 1.10 | 1.61 | 1.30 |      |       |       |      | 1836 | 207.9 | 5.10 |
| Q9UQD0 | Sodium channel protein type 8 subunit alpha OS=Homo sapiens GN=SCN8A PE=1 SV=1 - [SCN8A_HUMAN]            | 0.71  | 1 | 1 | 1 | 4  | 0.96 | 0.90 | 1.11 | 1.05 |      |       |       |      | 1980 | 225.1 | 6.28 |
| Q15858 | Sodium channel protein type 9 subunit alpha OS=Homo sapiens GN=SCN9A PE=1 SV=3 - [SCN9A_HUMAN]            | 0.35  | 1 | 1 | 1 | 1  |      | 0.62 | 0.89 | 0.60 | 0.86 | 1988  | 226.2 | 6.93 |      |       |      |
| Q8IWT1 | Sodium channel subunit beta-4 OS=Homo sapiens GN=SCN4B PE=1 SV=1 - [SCN4B_HUMAN]                          | 7.89  | 1 | 1 | 1 | 1  | 1.41 | 1.57 | 1.14 | 1.28 |      |       |       |      | 228  | 25.0  | 7.36 |
| Q8IZF0 | Sodium leak channel non-selective protein OS=Homo sapiens GN=NALCN PE=1 SV=1 - [NALCN_HUMAN]              | 0.92  | 1 | 1 | 2 | 26 |      | 0.97 | 1.03 | 0.96 | 1.02 | 1738  | 200.2 | 8.68 |      |       |      |
| P48029 | Sodium- and chloride-dependent creatine transporter 1 OS=Homo sapiens GN=SLC6A8 PE=1 SV=1 - [SC6A8_HUMAN] | 4.09  | 3 | 1 | 2 | 4  | 1.02 | 1.18 | 1.06 | 1.23 |      |       |       |      | 635  | 70.5  | 6.42 |
| P48067 | Sodium- and chloride-dependent glycine transporter 1 OS=Homo sapiens GN=SLC6A9 PE=2 SV=3 - [SC6A9_HUMAN]  | 3.97  | 1 | 1 | 1 | 1  |      | 0.43 | 0.43 | 0.78 | 0.78 | 706   | 78.2  | 7.93 |      |       |      |
| Q6U841 | Sodium-driven chloride bicarbonate exchanger OS=Homo sapiens GN=SLC4A10 PE=1 SV=1 - [S4A10_HUMAN]         | 2.06  | 1 | 1 | 1 | 3  | 1.50 | 1.92 | 1.33 | 1.71 |      |       |       |      | 1118 | 125.9 | 6.49 |
| Q5PT55 | Sodium/bile acid cotransporter 5 OS=Homo sapiens GN=SLC10A5 PE=1 SV=1 - [NTCP5_HUMAN]                     | 2.51  | 1 | 1 | 1 | 1  |      | 0.99 | 1.07 | 1.04 | 1.13 | 438   | 48.8  | 8.78 |      |       |      |
| P32418 | Sodium/calcium exchanger 1 OS=Homo sapiens GN=SLC8A1 PE=1 SV=3 - [NAC1_HUMAN]                             | 1.34  | 1 | 1 | 1 | 1  |      | 0.26 | 0.98 |      |      | 973   | 108.5 | 5.00 |      |       |      |
| Q2M3M2 | Sodium/glucose cotransporter 4 OS=Homo sapiens GN=SLC5A9 PE=2 SV=2 - [SC5A9_HUMAN]                        | 3.67  | 1 | 1 | 1 | 1  | 1.63 | 0.75 | 1.68 | 0.78 |      |       |       |      | 681  | 74.0  | 7.09 |
| Q5TAH2 | Sodium/hydrogen exchanger 11 OS=Homo sapiens GN=SLC9A11 PE=2 SV=1 - [S9A11_HUMAN]                         | 1.51  | 9 | 1 | 2 | 2  |      | 1.09 | 1.07 | 1.02 | 1.01 | 1124  | 129.0 | 6.92 |      |       |      |
| Q96T83 | Sodium/hydrogen exchanger 7 OS=Homo sapiens GN=SLC9A7 PE=1 SV=1 - [SL9A7_HUMAN]                           | 3.72  | 1 | 1 | 1 | 2  |      | 1.12 | 0.78 | 1.28 | 0.90 | 725   | 80.1  | 6.42 |      |       |      |
| Q8WWX8 | Sodium/myo-inositol cotransporter 2 OS=Homo sapiens GN=SLC5A11 PE=2 SV=1 - [SC5A11_HUMAN]                 | 2.22  | 1 | 1 | 1 | 1  | 1.38 | 1.46 | 1.33 | 1.40 |      |       |       |      | 675  | 74.0  | 6.77 |
| P50993 | Sodium/potassium-transporting ATPase subunit alpha-2 OS=Homo sapiens GN=ATP1A2 PE=1 SV=1 - [AT1A2_HUMAN]  | 2.16  | 1 | 1 | 1 | 2  |      | 1.24 | 1.43 | 1.15 | 1.32 | 1020  | 112.2 | 5.66 |      |       |      |
| O60721 | Sodium/potassium/calcium exchanger 1 OS=Homo sapiens GN=SLC24A1 PE=1 SV=1 - [NCKX1_HUMAN]                 | 0.73  | 1 | 1 | 1 | 1  |      | 0.42 | 0.48 | 0.74 | 0.85 | 1099  | 121.3 | 4.94 |      |       |      |
| Q6J4K2 | Sodium/potassium/calcium exchanger 6 OS=Homo sapiens GN=SLC24A6 PE=2 SV=2 - [NCKX6_HUMAN]                 | 4.62  | 1 | 1 | 1 | 2  | 0.84 | 0.66 | 0.83 | 0.66 |      |       |       |      | 584  | 64.2  | 8.02 |

|        |                                                                                                                             |       |   |    |    |    |      |      |      |      |      |       |       |      |
|--------|-----------------------------------------------------------------------------------------------------------------------------|-------|---|----|----|----|------|------|------|------|------|-------|-------|------|
| A1L4H1 | Soluble scavenger receptor cysteine-rich domain-containing protein SSC5D OS=Homo sapiens GN=SSC5D PE=2 SV=3 - [SRCRL_HUMAN] | 10.81 | 1 | 11 | 11 | 23 | 0.90 | 0.83 | 0.82 | 0.84 | 1573 | 165.6 | 6.13  |      |
| Q13621 | Solute carrier family 12 member 1 OS=Homo sapiens GN=SLC12A1 PE=1 SV=2 - [S12A1_HUMAN]                                      | 3.28  | 1 | 1  | 1  | 1  |      | 1.22 | 1.92 | 1.44 | 2.27 | 1099  | 121.4 | 7.39 |
| P55011 | Solute carrier family 12 member 2 OS=Homo sapiens GN=SLC12A2 PE=1 SV=1 - [S12A2_HUMAN]                                      | 1.65  | 1 | 1  | 1  | 1  | 1.21 | 1.36 | 1.27 | 1.44 |      | 1212  | 131.4 | 6.40 |
| Q9UP95 | Solute carrier family 12 member 4 OS=Homo sapiens GN=SLC12A4 PE=1 SV=2 - [S12A4_HUMAN]                                      | 1.20  | 1 | 1  | 1  | 4  | 0.95 | 0.93 | 0.94 | 0.93 |      | 1085  | 120.6 | 6.44 |
| Q9H2X9 | Solute carrier family 12 member 5 OS=Homo sapiens GN=SLC12A5 PE=2 SV=3 - [S12A5_HUMAN]                                      | 1.05  | 1 | 1  | 1  | 1  | 0.67 | 0.52 | 0.87 | 0.69 |      | 1139  | 126.1 | 6.73 |
| Q9Y666 | Solute carrier family 12 member 7 OS=Homo sapiens GN=SLC12A7 PE=1 SV=3 - [S12A7_HUMAN]                                      | 0.83  | 1 | 1  | 1  | 1  | 0.73 | 0.81 | 0.68 | 0.75 |      | 1083  | 119.0 | 6.71 |
| Q9BXP2 | Solute carrier family 12 member 9 OS=Homo sapiens GN=SLC12A9 PE=1 SV=1 - [S12A9_HUMAN]                                      | 1.75  | 1 | 1  | 1  | 2  |      | 0.86 | 0.88 | 0.84 | 0.85 | 914   | 96.0  | 8.07 |
| P11166 | Solute carrier family 2, facilitated glucose transporter member 1 OS=Homo sapiens GN=SLC2A1 PE=1 SV=2 - [GTR1_HUMAN]        | 2.64  | 1 | 1  | 1  | 1  | 0.93 | 1.00 | 0.98 | 1.05 |      | 492   | 54.0  | 8.72 |
| Q8TD20 | Solute carrier family 2, facilitated glucose transporter member 12 OS=Homo sapiens GN=SLC2A12 PE=2 SV=1 - [GTR12_HUMAN]     | 2.27  | 1 | 2  | 2  | 4  |      | 0.43 | 0.99 | 0.43 | 0.70 | 617   | 66.9  | 8.37 |
| P11169 | Solute carrier family 2, facilitated glucose transporter member 3 OS=Homo sapiens GN=SLC2A3 PE=1 SV=1 - [GTR3_HUMAN]        | 2.62  | 1 | 1  | 1  | 1  |      | 0.86 | 0.82 | 0.88 | 0.83 | 496   | 53.9  | 7.20 |
| O15245 | Solute carrier family 22 member 1 OS=Homo sapiens GN=SLC22A1 PE=1 SV=2 - [S22A1_HUMAN]                                      | 1.62  | 1 | 1  | 1  | 1  |      | 0.67 | 0.76 | 0.90 | 1.02 | 554   | 61.1  | 6.83 |
| O15244 | Solute carrier family 22 member 2 OS=Homo sapiens GN=SLC22A2 PE=1 SV=2 - [S22A2_HUMAN]                                      | 5.23  | 1 | 1  | 1  | 1  | 1.03 | 1.37 | 0.64 | 0.86 |      | 555   | 62.5  | 8.37 |
| Q9H015 | Solute carrier family 22 member 4 OS=Homo sapiens GN=SLC22A4 PE=1 SV=3 - [S22A4_HUMAN]                                      | 1.09  | 1 | 1  | 1  | 1  |      | 0.76 | 0.89 | 0.71 | 0.84 | 551   | 62.1  | 7.23 |
| Q8IVM8 | Solute carrier family 22 member 9 OS=Homo sapiens GN=SLC22A9 PE=2 SV=1 - [S22A9_HUMAN]                                      | 1.99  | 1 | 1  | 1  | 1  |      | 1.03 | 1.09 | 1.09 | 1.16 | 553   | 62.1  | 8.10 |
| Q6PIV7 | Solute carrier family 25 member 34 OS=Homo sapiens GN=SLC25A34 PE=2 SV=1 - [S2534_HUMAN]                                    | 3.29  | 1 | 2  | 2  | 3  |      | 0.82 | 0.88 | 0.83 | 0.89 | 304   | 32.2  | 9.13 |
| Q8NG04 | Solute carrier family 26 member 10 OS=Homo sapiens GN=SLC26A10 PE=2 SV=1 - [S2610_HUMAN]                                    | 2.84  | 1 | 1  | 1  | 9  |      | 0.70 | 0.79 | 0.71 | 0.79 | 563   | 60.0  | 8.27 |
| Q9NQQ7 | Solute carrier family 35 member C2 OS=Homo sapiens GN=SLC35C2 PE=1 SV=2 - [S35C2_HUMAN]                                     | 10.41 | 1 | 1  | 1  | 2  |      | 1.09 | 0.91 | 1.08 | 0.90 | 365   | 40.4  | 8.18 |
| P0CK96 | Solute carrier family 35 member E2B OS=Homo sapiens GN=SLC35E2B PE=2 SV=1 - [S352B_HUMAN]                                   | 8.89  | 1 | 1  | 1  | 2  | 0.82 | 0.80 | 0.70 | 0.68 |      | 405   | 43.7  | 8.40 |
| Q8IXU6 | Solute carrier family 35 member F2 OS=Homo sapiens GN=SLC35F2 PE=1 SV=1 - [S35F2_HUMAN]                                     | 3.48  | 1 | 1  | 1  | 1  |      | 0.51 | 0.49 | 0.51 | 0.49 | 374   | 41.2  | 6.21 |
| P0C7Q5 | Solute carrier family 35 member G4 OS=Homo sapiens GN=SLC35G4 PE=3 SV=1 - [S35G4_HUMAN]                                     | 14.20 | 1 | 2  | 2  | 2  | 3.92 | 5.63 | 4.54 | 6.61 |      | 338   | 35.4  | 7.17 |
| Q9NP59 | Solute carrier family 40 member 1 OS=Homo sapiens GN=SLC40A1 PE=1 SV=1 - [S40A1_HUMAN]                                      | 2.28  | 1 | 1  | 1  | 1  | 1.24 | 1.02 | 1.26 | 1.04 |      | 571   | 62.5  | 6.52 |
| Q8NB15 | Solute carrier family 43 member 3 OS=Homo sapiens GN=SLC43A3 PE=1 SV=2 - [S43A3_HUMAN]                                      | 5.09  | 1 | 1  | 1  | 1  |      | 0.79 | 0.92 | 0.74 | 0.87 | 491   | 54.5  | 8.53 |
| Q5BKX6 | Solute carrier family 45 member 4 OS=Homo sapiens GN=SLC45A4 PE=1 SV=2 - [S45A4_HUMAN]                                      | 1.69  | 1 | 1  | 1  | 1  |      | 0.34 | 0.10 | 2.16 | 0.64 | 768   | 83.8  | 5.53 |
| Q96BD0 | Solute carrier organic anion transporter family member 4A1 OS=Homo sapiens GN=SLCO4A1 PE=1 SV=2 - [SO4A1_HUMAN]             | 3.74  | 1 | 1  | 1  | 3  |      | 0.85 | 0.96 | 0.85 | 0.96 | 722   | 77.1  | 7.83 |
| Q6ZQN7 | Solute carrier organic anion transporter family member 4C1 OS=Homo sapiens GN=SLCO4C1 PE=1 SV=1 - [SO4C1_HUMAN]             | 4.56  | 1 | 2  | 2  | 3  | 1.53 | 1.55 | 1.41 | 1.43 |      | 724   | 78.9  | 7.53 |
| P32745 | Somatostatin receptor type 3 OS=Homo sapiens GN=SSTR3 PE=1 SV=1 - [SSR3_HUMAN]                                              | 3.35  | 1 | 1  | 1  | 1  | 0.37 | 0.45 | 0.75 | 0.92 |      | 418   | 45.8  | 8.59 |
| P01241 | Somatotropin OS=Homo sapiens GN=GHI1 PE=1 SV=2 - [SOMA_HUMAN]                                                               | 14.75 | 3 | 1  | 4  | 7  |      | 0.85 | 1.34 | 0.63 | 1.00 | 217   | 24.8  | 5.43 |

|        |                                                                                                         |       |    |    |    |    |      |      |      |      |      |      |       |      |      |       |       |
|--------|---------------------------------------------------------------------------------------------------------|-------|----|----|----|----|------|------|------|------|------|------|-------|------|------|-------|-------|
| Q07890 | Son of sevenless homolog 2 OS=Homo sapiens GN=SOS2 PE=1 SV=2 - [SOS2_HUMAN]                             | 1.80  | 1  | 2  | 2  | 2  | 1.27 | 1.37 | 1.28 | 1.39 |      | 1332 | 152.9 | 6.84 |      |       |       |
| Q15465 | Sonic hedgehog protein OS=Homo sapiens GN=SHH PE=1 SV=1 - [SHH_HUMAN]                                   | 4.11  | 1  | 1  | 1  | 1  |      |      |      |      | 1.01 | 1.21 | 0.89  | 1.06 | 462  | 49.6  | 7.99  |
| Q9BX66 | Sorbin and SH3 domain-containing protein 1 OS=Homo sapiens GN=SORBS1 PE=1 SV=3 - [SRBS1_HUMAN]          | 2.63  | 1  | 2  | 2  | 4  |      |      |      |      | 1.11 | 1.22 | 1.04  | 1.15 | 1292 | 142.4 | 6.84  |
| Q9Y512 | Sorting and assembly machinery component 50 homolog OS=Homo sapiens GN=SAMM50 PE=1 SV=3 - [SAM50_HUMAN] | 4.48  | 1  | 1  | 1  | 2  |      |      |      |      | 1.05 | 1.15 | 0.72  | 0.80 | 469  | 51.9  | 6.90  |
| Q9Y5W8 | Sorting nexin-13 OS=Homo sapiens GN=SNX13 PE=1 SV=4 - [SNX13_HUMAN]                                     | 3.31  | 1  | 1  | 2  | 2  | 1.22 | 1.83 | 1.39 | 2.10 |      |      |       |      | 968  | 112.1 | 6.58  |
| Q96RF0 | Sorting nexin-18 OS=Homo sapiens GN=SNX18 PE=1 SV=2 - [SNX18_HUMAN]                                     | 1.91  | 1  | 1  | 1  | 1  |      |      |      |      | 0.47 | 0.92 | 0.90  | 1.77 | 628  | 68.9  | 5.68  |
| Q92543 | Sorting nexin-19 OS=Homo sapiens GN=SNX19 PE=1 SV=2 - [SNX19_HUMAN]                                     | 1.71  | 1  | 1  | 1  | 1  |      |      |      |      | 0.47 | 0.83 | 0.44  | 0.77 | 992  | 108.5 | 5.03  |
| Q969T3 | Sorting nexin-21 OS=Homo sapiens GN=SNX21 PE=2 SV=1 - [SNX21_HUMAN]                                     | 3.22  | 1  | 1  | 1  | 2  |      |      |      |      | 0.82 | 0.49 | 0.96  | 0.58 | 373  | 41.3  | 5.24  |
| Q96L92 | Sorting nexin-27 OS=Homo sapiens GN=SNX27 PE=1 SV=2 - [SNX27_HUMAN]                                     | 4.07  | 1  | 2  | 2  | 8  | 1.03 | 0.93 | 1.09 | 0.99 | 0.65 | 0.78 | 0.69  | 0.73 | 541  | 61.2  | 6.49  |
| Q86XE0 | Sorting nexin-32 OS=Homo sapiens GN=SNX32 PE=2 SV=1 - [SNX32_HUMAN]                                     | 2.48  | 1  | 1  | 1  | 1  | 1.13 | 1.34 | 1.16 | 1.39 |      |      |       |      | 403  | 46.4  | 7.09  |
| Q9UNH7 | Sorting nexin-6 OS=Homo sapiens GN=SNX6 PE=1 SV=1 - [SNX6_HUMAN]                                        | 5.91  | 1  | 1  | 2  | 5  |      |      |      |      | 0.34 | 0.30 | 1.33  | 1.16 | 406  | 46.6  | 6.16  |
| Q96AH0 | SOSS complex subunit B2 OS=Homo sapiens GN=OBFC2A PE=1 SV=1 - [SOSB2_HUMAN]                             | 2.94  | 1  | 1  | 1  | 1  | 0.96 | 1.77 | 1.13 | 2.09 |      |      |       |      | 204  | 22.4  | 9.58  |
| P09486 | SPARC OS=Homo sapiens GN=SPARC PE=1 SV=1 - [SPRC_HUMAN]                                                 | 43.56 | 1  | 11 | 11 | 60 | 1.40 | 1.33 | 1.32 | 1.29 | 1.12 | 1.10 | 1.11  | 1.08 | 303  | 34.6  | 4.84  |
| Q14515 | SPARC-like protein 1 OS=Homo sapiens GN=SPARCL1 PE=1 SV=2 - [SPRL1_HUMAN]                               | 13.55 | 1  | 6  | 6  | 23 | 1.06 | 1.01 | 1.01 | 1.08 | 0.85 | 0.85 | 0.91  | 0.86 | 664  | 75.2  | 4.81  |
| Q8N0X7 | Spartin OS=Homo sapiens GN=SPG20 PE=1 SV=1 - [SPG20_HUMAN]                                              | 1.20  | 1  | 1  | 1  | 3  |      |      |      |      | 1.28 | 1.38 | 1.26  | 1.35 | 666  | 72.8  | 5.91  |
| Q96JI7 | Spatacsin OS=Homo sapiens GN=SPG11 PE=1 SV=3 - [SPTCS_HUMAN]                                            | 2.09  | 1  | 2  | 3  | 5  | 1.17 | 0.81 | 0.76 | 0.92 | 0.77 | 0.79 | 0.53  | 0.54 | 2443 | 278.7 | 5.97  |
| Q9BW04 | Specifically androgen-regulated gene protein OS=Homo sapiens GN=SARG PE=1 SV=2 - [SARG_HUMAN]           | 1.66  | 1  | 1  | 1  | 2  |      |      |      |      | 0.75 | 0.76 | 0.85  | 0.86 | 601  | 63.9  | 8.62  |
| O43791 | Speckle-type POZ protein OS=Homo sapiens GN=SPOP PE=1 SV=1 - [SPOP_HUMAN]                               | 1.87  | 2  | 1  | 1  | 3  | 0.30 | 0.36 | 0.32 | 0.39 |      |      |       |      | 374  | 42.1  | 5.80  |
| Q13813 | Spectrin alpha chain, brain OS=Homo sapiens GN=SPTAN1 PE=1 SV=3 - [SPTA2_HUMAN]                         | 3.56  | 2  | 5  | 6  | 6  | 1.25 | 1.25 | 1.26 | 1.26 | 1.15 | 1.18 | 1.00  | 1.03 | 2472 | 284.4 | 5.35  |
| P02549 | Spectrin alpha chain, erythrocyte OS=Homo sapiens GN=SPTA1 PE=1 SV=5 - [SPTA1_HUMAN]                    | 2.15  | 1  | 3  | 4  | 5  |      |      |      |      | 0.66 | 0.67 | 0.69  | 0.69 | 2419 | 279.8 | 5.05  |
| Q01082 | Spectrin beta chain, brain 1 OS=Homo sapiens GN=SPTBN1 PE=1 SV=2 - [SPTB2_HUMAN]                        | 4.36  | 2  | 6  | 8  | 13 | 0.86 | 1.18 | 0.74 | 0.98 | 1.13 | 1.39 | 1.52  | 1.87 | 2364 | 274.4 | 5.57  |
| Q9H254 | Spectrin beta chain, brain 3 OS=Homo sapiens GN=SPTBN4 PE=1 SV=2 - [SPTN4_HUMAN]                        | 2.11  | 1  | 1  | 4  | 9  |      |      |      |      | 0.98 | 0.02 | 0.97  | 0.02 | 2564 | 288.8 | 6.01  |
| P11277 | Spectrin beta chain, erythrocyte OS=Homo sapiens GN=SPTB PE=1 SV=5 - [SPTB1_HUMAN]                      | 4.91  | 1  | 5  | 7  | 10 | 1.09 | 1.22 | 1.06 | 1.28 |      |      |       |      | 2137 | 246.3 | 5.27  |
| Q9C093 | Sperm flagellar protein 2 OS=Homo sapiens GN=SPEF2 PE=1 SV=2 - [SPEF2_HUMAN]                            | 1.54  | 13 | 1  | 2  | 2  | 1.58 | 1.30 | 0.76 | 0.63 |      |      |       |      | 1822 | 209.7 | 5.54  |
| Q08648 | Sperm-associated antigen 11B OS=Homo sapiens GN=SPAG11B PE=2 SV=4 - [SG11B_HUMAN]                       | 18.45 | 2  | 1  | 1  | 1  | 0.58 | 0.47 | 0.63 | 0.52 |      |      |       |      | 103  | 11.4  | 11.49 |
| Q8N0X2 | Sperm-associated antigen 16 protein OS=Homo sapiens GN=SPAG16 PE=2 SV=2 - [SPG16_HUMAN]                 | 1.74  | 1  | 1  | 1  | 2  | 1.68 | 1.33 | 1.80 | 1.43 | 1.04 | 0.89 | 1.13  | 0.97 | 631  | 70.8  | 6.33  |
| Q96R06 | Sperm-associated antigen 5 OS=Homo sapiens GN=SPAG5 PE=1 SV=2 - [SPAG5_HUMAN]                           | 3.77  | 1  | 3  | 3  | 12 | 0.71 | 0.76 | 0.94 | 1.02 |      |      |       |      | 1193 | 134.3 | 5.00  |



|        |                                                                                                              |       |   |   |   |   |      |      |      |      |      |       |      |      |      |       |      |
|--------|--------------------------------------------------------------------------------------------------------------|-------|---|---|---|---|------|------|------|------|------|-------|------|------|------|-------|------|
| O75391 | Sperm-associated antigen 7 OS=Homo sapiens GN=SPAG7 PE=1 SV=2 - [SPAG7_HUMAN]                                | 3.96  | 1 | 1 | 1 | 1 | 0.67 | 0.88 | 0.83 | 1.10 | 227  | 26.0  | 7.91 |      |      |       |      |
| Q96SI9 | Spermatid perinuclear RNA-binding protein OS=Homo sapiens GN=STRBP PE=1 SV=1 - [STRBP_HUMAN]                 | 3.42  | 1 | 1 | 1 | 1 |      |      |      |      | 1.25 | 1.67  | 0.88 | 1.17 | 672  | 73.6  | 8.72 |
| Q9BXB7 | Spermatogenesis-associated protein 16 OS=Homo sapiens GN=SPATA16 PE=1 SV=3 - [SPT16_HUMAN]                   | 3.34  | 1 | 1 | 1 | 2 | 0.76 | 0.96 | 0.63 | 0.81 | 569  | 65.2  | 9.14 |      |      |       |      |
| Q8TB22 | Spermatogenesis-associated protein 20 OS=Homo sapiens GN=SPATA20 PE=2 SV=3 - [SPT20_HUMAN]                   | 5.47  | 1 | 2 | 2 | 2 |      |      |      |      | 0.78 | 0.72  | 1.63 | 1.51 | 786  | 87.8  | 7.43 |
| Q86W54 | Spermatogenesis-associated protein 24 OS=Homo sapiens GN=SPATA24 PE=2 SV=2 - [SPA24_HUMAN]                   | 6.34  | 1 | 1 | 1 | 3 | 0.93 | 0.86 | 1.03 | 0.88 | 205  | 23.6  | 7.99 |      |      |       |      |
| Q9BVQ7 | Spermatogenesis-associated protein 5-like protein 1 OS=Homo sapiens GN=SPATA5L1 PE=1 SV=2 - [SPA5L_HUMAN]    | 1.99  | 8 | 1 | 2 | 2 | 1.14 | 1.19 | 1.01 | 1.07 | 753  | 80.7  | 8.09 |      |      |       |      |
| Q86XZ4 | Spermatogenesis-associated serine-rich protein 2 OS=Homo sapiens GN=SPATS2 PE=1 SV=1 - [SPAS2_HUMAN]         | 7.16  | 1 | 2 | 2 | 2 | 0.97 | 0.98 | 0.93 | 0.95 | 545  | 59.5  | 8.90 |      |      |       |      |
| Q9H9C1 | Spermatogenesis-defective protein 39 homolog OS=Homo sapiens GN=SPE39 PE=1 SV=1 - [SPE39_HUMAN]              | 7.30  | 2 | 2 | 3 | 3 | 0.56 | 0.66 | 0.59 | 0.70 | 0.26 | 0.16  | 0.84 | 0.51 | 493  | 57.0  | 7.40 |
| Q86VE3 | Spermidine/spermine N(1)-acetyltransferase-like protein 1 OS=Homo sapiens GN=SATL1 PE=2 SV=3 - [SATL1_HUMAN] | 10.43 | 1 | 2 | 2 | 2 | 0.68 | 0.66 | 0.71 | 0.70 | 508  | 55.8  | 5.31 |      |      |       |      |
| Q9NWM0 | Spermine oxidase OS=Homo sapiens GN=SMOX PE=1 SV=1 - [SMOX_HUMAN]                                            | 1.26  | 1 | 1 | 1 | 1 |      |      |      |      | 0.43 | 0.45  | 0.44 | 0.47 | 555  | 61.8  | 5.45 |
| P17405 | Sphingomyelin phosphodiesterase OS=Homo sapiens GN=SMPD1 PE=1 SV=4 - [ASM_HUMAN]                             | 1.75  | 1 | 1 | 1 | 1 | 1.07 | 1.21 | 1.15 | 1.30 | 629  | 69.7  | 7.28 |      |      |       |      |
| O95136 | Sphingosine 1-phosphate receptor 2 OS=Homo sapiens GN=S1PR2 PE=1 SV=2 - [S1PR2_HUMAN]                        | 6.80  | 1 | 1 | 1 | 1 |      |      |      |      | 1.99 | 0.19  | 1.07 | 0.10 | 353  | 38.8  | 8.97 |
| O95470 | Sphingosine-1-phosphate lyase 1 OS=Homo sapiens GN=SGPL1 PE=1 SV=3 - [SGPL1_HUMAN]                           | 1.76  | 1 | 1 | 1 | 5 | 1.89 |      | 1.98 |      | 568  | 63.5  | 9.16 |      |      |       |      |
| Q8IWX5 | Sphingosine-1-phosphate phosphatase 2 OS=Homo sapiens GN=SGPP2 PE=2 SV=1 - [SGPP2_HUMAN]                     | 1.25  | 1 | 1 | 1 | 1 | 1.42 | 1.48 | 0.85 | 0.88 | 399  | 44.7  | 9.04 |      |      |       |      |
| Q8N0Z3 | Spindle and centriole-associated protein 1 OS=Homo sapiens GN=SPICE1 PE=1 SV=1 - [SPICE_HUMAN]               | 1.87  | 1 | 1 | 1 | 1 |      |      |      |      | 1.08 | 1.18  | 0.92 | 1.01 | 855  | 96.2  | 7.44 |
| Q8IX90 | Spindle and kinetochore-associated protein 3 OS=Homo sapiens GN=SKA3 PE=1 SV=2 - [SKA3_HUMAN]                | 5.34  | 1 | 1 | 1 | 3 | 1.26 | 1.45 | 1.17 | 1.35 | 412  | 46.3  | 5.11 |      |      |       |      |
| Q6UVJ0 | Spindle assembly abnormal protein 6 homolog OS=Homo sapiens GN=SASS6 PE=1 SV=1 - [SAS6_HUMAN]                | 2.44  | 1 | 1 | 1 | 1 |      |      |      |      | 1.17 | 0.93  | 1.21 | 0.97 | 657  | 74.4  | 7.55 |
| Q99865 | Spindlin-2A OS=Homo sapiens GN=SPIN2A PE=1 SV=3 - [SPI2A_HUMAN]                                              | 12.40 | 2 | 2 | 2 | 2 | 0.86 | 0.87 | 1.00 | 1.02 | 258  | 29.2  | 7.23 |      |      |       |      |
| O75533 | Splicing factor 3B subunit 1 OS=Homo sapiens GN=SF3B1 PE=1 SV=3 - [SF3B1_HUMAN]                              | 0.46  | 1 | 1 | 1 | 1 |      |      |      |      | 2.75 | 2.57  | 2.32 | 2.16 | 1304 | 145.7 | 7.09 |
| Q13435 | Splicing factor 3B subunit 2 OS=Homo sapiens GN=SF3B2 PE=1 SV=2 - [SF3B2_HUMAN]                              | 1.56  | 5 | 1 | 2 | 2 | 1.41 | 1.32 | 0.82 | 0.77 | 895  | 100.2 | 5.67 |      |      |       |      |
| Q15393 | Splicing factor 3B subunit 3 OS=Homo sapiens GN=SF3B3 PE=1 SV=4 - [SF3B3_HUMAN]                              | 1.23  | 1 | 1 | 1 | 1 | 0.98 | 1.08 | 0.95 | 1.06 | 1217 | 135.5 | 5.26 |      |      |       |      |
| Q9H7N4 | Splicing factor, arginine/serine-rich 19 OS=Homo sapiens GN=SCAF1 PE=1 SV=3 - [SFR19_HUMAN]                  | 0.76  | 1 | 1 | 1 | 1 | 0.86 | 0.73 | 0.53 | 0.46 | 1312 | 139.2 | 9.25 |      |      |       |      |
| Q12872 | Splicing factor, suppressor of white-apricot homolog OS=Homo sapiens GN=SFSWAP PE=1 SV=3 - [SFSWA_HUMAN]     | 0.95  | 1 | 1 | 1 | 2 |      |      |      |      | 1.30 | 1.23  | 1.24 | 1.17 | 951  | 104.8 | 8.05 |
| Q9HCB6 | Spondin-1 OS=Homo sapiens GN=SPON1 PE=1 SV=2 - [SPON1_HUMAN]                                                 | 4.21  | 1 | 3 | 3 | 6 |      |      |      |      | 0.90 | 0.90  | 1.03 | 1.03 | 807  | 90.9  | 6.11 |
| Q9BUD6 | Spondin-2 OS=Homo sapiens GN=SPON2 PE=1 SV=3 - [SPON2_HUMAN]                                                 | 3.63  | 1 | 1 | 1 | 3 |      |      |      |      | 1.33 | 1.15  | 1.28 | 1.11 | 331  | 35.8  | 5.52 |
| Q7Z698 | Sprouty-related, EVH1 domain-containing protein 2 OS=Homo sapiens GN=SPRED2 PE=1 SV=2 - [SPRE2_HUMAN]        | 11.24 | 1 | 1 | 2 | 4 | 2.11 | 2.36 | 1.38 | 1.56 | 418  | 47.5  | 6.79 |      |      |       |      |
| Q5W111 | SPRY domain-containing protein 7 OS=Homo sapiens GN=SPRYD7 PE=1 SV=2 - [SPRY7_HUMAN]                         | 4.08  | 1 | 1 | 1 | 1 |      |      |      |      | 0.84 | 0.98  | 0.77 | 0.91 | 196  | 21.7  | 6.70 |

|        |                                                                                                                        |       |   |   |   |    |      |      |      |      |      |      |      |      |      |       |      |
|--------|------------------------------------------------------------------------------------------------------------------------|-------|---|---|---|----|------|------|------|------|------|------|------|------|------|-------|------|
| Q96A44 | SPRY domain-containing SOCS box protein 4 OS=Homo sapiens GN=SPSB4 PE=1 SV=1 - [SPSB4_HUMAN]                           | 6.23  | 1 | 1 | 1 | 2  | 1.26 | 1.19 | 1.29 | 1.23 | 1.33 | 1.57 | 1.47 | 1.74 | 273  | 30.2  | 9.35 |
| Q56UN5 | SPS1/STE20-related protein kinase YSK4 OS=Homo sapiens GN=YSK4 PE=1 SV=1 - [YSK4_HUMAN]                                | 4.52  | 1 | 2 | 2 | 2  | 0.88 | 0.92 | 1.20 | 1.24 |      |      |      |      | 1328 | 150.4 | 7.05 |
| Q15020 | Squamous cell carcinoma antigen recognized by T-cells 3 OS=Homo sapiens GN=SART3 PE=1 SV=1 - [SART3_HUMAN]             | 3.32  | 1 | 1 | 1 | 1  | 0.83 | 0.72 | 1.75 | 1.52 |      |      |      |      | 963  | 109.9 | 5.57 |
| O75563 | Src kinase-associated phosphoprotein 2 OS=Homo sapiens GN=SKAP2 PE=1 SV=1 - [SKAP2_HUMAN]                              | 10.86 | 1 | 4 | 4 | 8  | 0.95 | 1.04 | 0.81 | 0.90 | 1.68 | 1.74 | 1.52 | 1.57 | 359  | 41.2  | 4.69 |
| Q14247 | Src substrate cortactin OS=Homo sapiens GN=CTTN PE=1 SV=2 - [SRC8_HUMAN]                                               | 6.00  | 1 | 3 | 3 | 12 |      |      |      |      | 1.59 | 1.23 | 1.41 | 1.22 | 550  | 61.5  | 5.40 |
| Q96SB4 | SRSF protein kinase 1 OS=Homo sapiens GN=SRPK1 PE=1 SV=2 - [SRPK1_HUMAN]                                               | 3.82  | 2 | 2 | 2 | 2  |      |      |      |      | 0.70 | 1.09 | 0.44 | 0.68 | 655  | 74.3  | 6.16 |
| Q9UPE1 | SRSF protein kinase 3 OS=Homo sapiens GN=SRPK3 PE=2 SV=2 - [SRPK3_HUMAN]                                               | 2.65  | 1 | 1 | 1 | 1  |      |      |      |      | 0.91 | 0.85 | 1.09 | 1.03 | 567  | 62.0  | 7.25 |
| Q9NY15 | Stabilin-1 OS=Homo sapiens GN=STAB1 PE=1 SV=3 - [STAB1_HUMAN]                                                          | 4.55  | 1 | 7 | 8 | 13 | 1.55 | 1.26 | 1.17 | 1.07 | 0.28 | 0.25 | 0.81 | 0.66 | 2570 | 275.3 | 6.49 |
| Q8WWQ8 | Stabilin-2 OS=Homo sapiens GN=STAB2 PE=1 SV=3 - [STAB2_HUMAN]                                                          | 1.22  | 1 | 2 | 3 | 6  | 1.18 | 1.16 | 1.29 | 1.29 | 1.31 | 1.30 | 1.64 | 1.62 | 2551 | 276.8 | 6.40 |
| Q7KZF4 | Staphylococcal nuclease domain-containing protein 1 OS=Homo sapiens GN=SND1 PE=1 SV=1 - [SND1_HUMAN]                   | 2.09  | 1 | 1 | 1 | 4  | 0.45 | 0.61 | 0.39 | 0.52 |      |      |      |      | 910  | 101.9 | 7.17 |
| Q9Y3M8 | StAR-related lipid transfer protein 13 OS=Homo sapiens GN=STARD13 PE=1 SV=2 - [STA13_HUMAN]                            | 1.44  | 1 | 1 | 1 | 1  | 1.06 |      | 1.18 |      |      |      |      |      | 1113 | 124.9 | 7.02 |
| Q9P2P6 | StAR-related lipid transfer protein 9 OS=Homo sapiens GN=STARD9 PE=1 SV=3 - [STAR9_HUMAN]                              | 1.02  | 1 | 2 | 2 | 2  |      |      |      |      | 0.95 | 1.22 | 0.77 | 1.00 | 4700 | 516.0 | 6.32 |
| O95210 | Starch-binding domain-containing protein 1 OS=Homo sapiens GN=STBD1 PE=1 SV=1 - [STBD1_HUMAN]                          | 5.03  | 1 | 1 | 1 | 4  |      |      |      |      | 0.46 | 0.37 | 0.54 | 0.44 | 358  | 39.0  | 5.73 |
| P16949 | Stathmin OS=Homo sapiens GN=STMN1 PE=1 SV=3 - [STMN1_HUMAN]                                                            | 6.04  | 2 | 1 | 1 | 1  |      |      |      |      | 2.29 | 2.46 | 1.87 | 2.00 | 149  | 17.3  | 5.97 |
| Q9H2G2 | STE20-like serine/threonine-protein kinase OS=Homo sapiens GN=SLK PE=1 SV=1 - [SLK_HUMAN]                              | 5.10  | 1 | 4 | 4 | 4  | 1.30 | 1.07 | 1.74 | 1.44 | 4.24 | 3.93 | 0.79 | 0.62 | 1235 | 142.6 | 5.15 |
| Q9C0K7 | STE20-related kinase adapter protein beta OS=Homo sapiens GN=STRADB PE=1 SV=1 - [STRAB_HUMAN]                          | 1.44  | 1 | 1 | 1 | 1  |      |      |      |      | 1.20 | 1.07 | 1.44 | 1.29 | 418  | 47.0  | 7.01 |
| Q86SK9 | Stearoyl-CoA desaturase 5 OS=Homo sapiens GN=SCD5 PE=2 SV=2 - [SCD5_HUMAN]                                             | 7.88  | 1 | 1 | 1 | 1  | 0.59 |      | 0.71 |      |      |      |      |      | 330  | 37.6  | 9.61 |
| Q96NU1 | Sterile alpha motif domain-containing protein 11 OS=Homo sapiens GN=SAMD11 PE=2 SV=3 - [SAM11_HUMAN]                   | 4.55  | 1 | 1 | 1 | 1  |      |      |      |      | 1.57 | 1.52 | 1.41 | 1.37 | 681  | 72.7  | 7.59 |
| Q8IVG5 | Sterile alpha motif domain-containing protein 9-like OS=Homo sapiens GN=SAMD9L PE=1 SV=2 - [SAM9L_HUMAN]               | 0.95  | 1 | 1 | 1 | 3  | 1.46 | 1.42 | 1.76 | 1.73 |      |      |      |      | 1584 | 184.4 | 8.02 |
| P05093 | Steroid 17-alpha-hydroxylase/17,20 lyase OS=Homo sapiens GN=CYP17A1 PE=1 SV=1 - [CP17A_HUMAN]                          | 4.53  | 1 | 3 | 3 | 10 | 0.81 | 1.23 | 0.66 | 1.00 | 0.76 | 0.76 | 0.74 | 0.80 | 508  | 57.3  | 8.57 |
| O95718 | Steroid hormone receptor ERR2 OS=Homo sapiens GN=ESRRB PE=1 SV=2 - [ERR2_HUMAN]                                        | 4.33  | 1 | 1 | 1 | 1  |      |      |      |      | 0.90 | 1.22 | 1.26 | 1.71 | 508  | 56.2  | 8.28 |
| Q13285 | Steroidogenic factor 1 OS=Homo sapiens GN=NR5A1 PE=1 SV=2 - [STF1_HUMAN]                                               | 4.34  | 1 | 1 | 2 | 2  |      |      |      |      | 1.17 | 1.20 | 1.06 | 1.08 | 461  | 51.6  | 7.68 |
| P36956 | Sterol regulatory element-binding protein 1 OS=Homo sapiens GN=SREBF1 PE=1 SV=2 - [SRBP1_HUMAN]                        | 1.66  | 7 | 1 | 2 | 2  |      |      |      |      | 0.97 | 0.89 | 0.94 | 0.86 | 1147 | 121.6 | 8.13 |
| Q12770 | Sterol regulatory element-binding protein cleavage-activating protein OS=Homo sapiens GN=SCAP PE=1 SV=4 - [SCAP_HUMAN] | 0.86  | 1 | 1 | 1 | 1  | 0.79 | 0.80 | 0.86 | 0.88 |      |      |      |      | 1279 | 139.6 | 6.86 |
| Q8WXE9 | Stonin-2 OS=Homo sapiens GN=STON2 PE=1 SV=1 - [STON2_HUMAN]                                                            | 0.99  | 1 | 1 | 1 | 1  | 0.63 | 0.59 | 0.81 | 0.77 |      |      |      |      | 905  | 101.1 | 5.39 |
| Q6ZVD7 | Storkhead-box protein 1 OS=Homo sapiens GN=STOX1 PE=1 SV=2 - [STOX1_HUMAN]                                             | 8.90  | 1 | 3 | 3 | 18 | 0.32 | 0.32 | 0.58 | 0.59 | 0.63 | 0.25 | 1.12 | 0.44 | 989  | 110.9 | 7.78 |
| P31948 | Stress-induced-phosphoprotein 1 OS=Homo sapiens GN=STIP1 PE=1 SV=1 - [STIP1_HUMAN]                                     | 1.29  | 1 | 1 | 1 | 3  |      |      |      |      | 1.17 | 1.26 | 1.10 | 1.19 | 543  | 62.6  | 6.80 |

|        |                                                                                                                                      |       |   |    |    |    |      |      |      |      |      |      |      |      |      |       |       |
|--------|--------------------------------------------------------------------------------------------------------------------------------------|-------|---|----|----|----|------|------|------|------|------|------|------|------|------|-------|-------|
| Q13033 | Striatin-3 OS=Homo sapiens GN=STRN3 PE=1 SV=3 - [STRN3_HUMAN]                                                                        | 4.14  | 1 | 2  | 2  | 2  | 1.39 | 1.25 | 1.12 | 1.02 | 1.22 | 1.01 | 0.73 | 0.61 | 797  | 87.2  | 5.36  |
| Q9NRL3 | Striatin-4 OS=Homo sapiens GN=STRN4 PE=1 SV=2 - [STRN4_HUMAN]                                                                        | 5.44  | 1 | 1  | 1  | 1  | 0.85 | 0.94 | 0.94 | 1.04 |      |      |      |      | 753  | 80.5  | 5.40  |
| P48061 | Stromal cell-derived factor 1 OS=Homo sapiens GN=CXCL12 PE=1 SV=1 - [SDF1_HUMAN]                                                     | 8.60  | 1 | 1  | 1  | 6  |      |      |      |      | 1.48 | 1.49 | 1.39 | 1.40 | 93   | 10.7  | 9.88  |
| Q13586 | Stromal interaction molecule 1 OS=Homo sapiens GN=STIM1 PE=1 SV=3 - [STIM1_HUMAN]                                                    | 1.46  | 1 | 1  | 1  | 2  |      |      |      |      | 0.84 | 0.77 | 0.74 | 0.68 | 685  | 77.4  | 6.67  |
| P08254 | Stromelysin-1 OS=Homo sapiens GN=MMP3 PE=1 SV=2 - [MMP3_HUMAN]                                                                       | 1.89  | 1 | 1  | 1  | 2  |      |      |      |      | 5.47 | 5.97 | 4.55 | 4.96 | 477  | 53.9  | 6.16  |
| A6NHR9 | Structural maintenance of chromosomes flexible hinge domain-containing protein 1 OS=Homo sapiens GN=SMCHD1 PE=1 SV=2 - [SMHD1_HUMAN] | 0.35  | 1 | 1  | 1  | 1  |      |      |      |      |      |      |      | 0.96 | 2005 | 226.2 | 7.30  |
| Q14683 | Structural maintenance of chromosomes protein 1A OS=Homo sapiens GN=SMC1A PE=1 SV=2 - [SMC1A_HUMAN]                                  | 0.89  | 1 | 1  | 1  | 1  |      |      |      |      | 1.03 | 1.30 | 0.89 | 1.12 | 1233 | 143.1 | 7.64  |
| Q8NDV3 | Structural maintenance of chromosomes protein 1B OS=Homo sapiens GN=SMC1B PE=1 SV=2 - [SMC1B_HUMAN]                                  | 0.89  | 1 | 1  | 1  | 1  | 0.20 | 0.35 | 0.71 | 1.24 |      |      |      |      | 1235 | 143.8 | 7.66  |
| Q9NTJ3 | Structural maintenance of chromosomes protein 4 OS=Homo sapiens GN=SMC4 PE=1 SV=2 - [SMC4_HUMAN]                                     | 2.17  | 1 | 2  | 2  | 3  | 1.14 | 1.24 | 1.06 | 1.17 | 0.59 | 0.59 | 0.66 | 0.66 | 1288 | 147.1 | 6.79  |
| Q8IY18 | Structural maintenance of chromosomes protein 5 OS=Homo sapiens GN=SMC5 PE=1 SV=2 - [SMC5_HUMAN]                                     | 6.18  | 1 | 2  | 3  | 4  | 0.91 | 0.76 | 0.73 | 0.61 |      |      |      |      | 1101 | 128.7 | 8.38  |
| Q8IY92 | Structure-specific endonuclease subunit SLX4 OS=Homo sapiens GN=SLX4 PE=1 SV=3 - [SLX4_HUMAN]                                        | 0.71  | 1 | 1  | 1  | 1  | 1.00 | 1.12 | 1.20 | 1.35 |      |      |      |      | 1834 | 199.9 | 6.06  |
| A6NFY7 | Succinate dehydrogenase assembly factor 1, mitochondrial OS=Homo sapiens GN=SDHAF1 PE=1 SV=1 - [SDHF1_HUMAN]                         | 13.91 | 1 | 1  | 1  | 1  | 1.60 | 1.38 | 1.56 | 1.36 |      |      |      |      | 115  | 12.8  | 11.39 |
| Q9NX18 | Succinate dehydrogenase assembly factor 2, mitochondrial OS=Homo sapiens GN=SDHAF2 PE=1 SV=1 - [SDHF2_HUMAN]                         | 9.04  | 1 | 1  | 1  | 1  | 0.77 | 0.92 | 0.85 | 1.03 |      |      |      |      | 166  | 19.6  | 6.80  |
| P53597 | Succinyl-CoA ligase [ADP/GDP-forming] subunit alpha, mitochondrial OS=Homo sapiens GN=SUCLG1 PE=1 SV=4 - [SUCA_HUMAN]                | 7.23  | 1 | 1  | 1  | 1  |      |      |      |      | 0.86 | 0.86 | 0.48 | 0.48 | 346  | 36.2  | 8.79  |
| Q8TED4 | Sugar phosphate exchanger 2 OS=Homo sapiens GN=SLC37A2 PE=2 SV=2 - [SPX2_HUMAN]                                                      | 6.79  | 1 | 2  | 2  | 3  | 0.55 | 0.58 | 1.01 | 1.06 | 0.88 | 0.66 | 0.79 | 0.58 | 501  | 54.4  | 6.81  |
| Q9H2B4 | Sulfate anion transporter 1 OS=Homo sapiens GN=SLC26A1 PE=2 SV=2 - [S26A1_HUMAN]                                                     | 3.14  | 1 | 1  | 1  | 1  | 0.45 |      | 0.75 |      |      |      |      |      | 701  | 75.0  | 8.10  |
| O00391 | Sulfhydryl oxidase 1 OS=Homo sapiens GN=QSOX1 PE=1 SV=3 - [QSOX1_HUMAN]                                                              | 29.59 | 2 | 22 | 22 | 91 | 1.13 | 1.14 | 1.08 | 1.15 | 1.28 | 1.36 | 1.18 | 1.32 | 747  | 82.5  | 8.92  |
| Q6ZRP7 | Sulfhydryl oxidase 2 OS=Homo sapiens GN=QSOX2 PE=1 SV=3 - [QSOX2_HUMAN]                                                              | 0.86  | 1 | 1  | 1  | 1  |      |      |      |      | 0.60 | 0.39 | 1.14 | 0.75 | 698  | 77.5  | 7.72  |
| P50224 | Sulfotransferase 1A3/1A4 OS=Homo sapiens GN=SULT1A3 PE=1 SV=1 - [ST1A3_HUMAN]                                                        | 8.14  | 3 | 2  | 2  | 4  | 0.82 |      | 0.75 | 0.98 | 0.92 | 1.09 | 1.03 | 295  | 34.2 | 6.01  |       |
| O75897 | Sulfotransferase 1C4 OS=Homo sapiens GN=SULT1C4 PE=1 SV=2 - [ST1C4_HUMAN]                                                            | 9.27  | 1 | 2  | 2  | 3  | 0.27 | 0.26 | 0.33 | 0.32 | 0.52 | 0.36 | 0.53 | 0.36 | 302  | 35.5  | 8.19  |
| O00204 | Sulfotransferase family cytosolic 2B member 1 OS=Homo sapiens GN=SULT2B1 PE=1 SV=2 - [ST2B1_HUMAN]                                   | 4.93  | 1 | 1  | 1  | 2  |      |      |      |      | 0.75 | 0.82 | 0.75 | 0.81 | 365  | 41.3  | 5.40  |
| Q9UBE0 | SUMO-activating enzyme subunit 1 OS=Homo sapiens GN=SAE1 PE=1 SV=1 - [SAE1_HUMAN]                                                    | 2.31  | 1 | 1  | 1  | 6  | 0.74 | 0.67 | 0.73 | 0.67 | 1.21 | 1.06 | 1.02 | 0.89 | 346  | 38.4  | 5.30  |
| Q9UH99 | SUN domain-containing protein 2 OS=Homo sapiens GN=SUN2 PE=1 SV=3 - [SUN2_HUMAN]                                                     | 2.09  | 1 | 1  | 1  | 1  |      |      |      |      | 0.74 | 0.61 | 0.95 | 0.79 | 717  | 80.3  | 6.73  |
| Q8TAQ9 | SUN domain-containing protein 3 OS=Homo sapiens GN=SUN3 PE=2 SV=4 - [SUN3_HUMAN]                                                     | 9.80  | 1 | 2  | 2  | 6  | 1.84 |      | 1.20 |      |      |      |      |      | 357  | 40.5  | 7.83  |
| P00441 | Superoxide dismutase [Cu-Zn] OS=Homo sapiens GN=SOD1 PE=1 SV=2 - [SODC_HUMAN]                                                        | 43.51 | 1 | 5  | 5  | 18 | 0.87 | 0.83 | 0.92 | 0.85 | 1.14 | 1.08 | 1.05 | 1.01 | 154  | 15.9  | 6.13  |
| P04179 | Superoxide dismutase [Mn], mitochondrial OS=Homo sapiens GN=SOD2 PE=1 SV=2 - [SODM_HUMAN]                                            | 13.51 | 1 | 3  | 3  | 11 | 0.59 | 0.58 | 0.54 | 0.54 | 0.79 | 0.82 | 0.84 | 0.86 | 222  | 24.7  | 8.25  |
| O60284 | Suppression of tumorigenicity 18 protein OS=Homo sapiens GN=ST18 PE=1 SV=1 - [ST18_HUMAN]                                            | 1.91  | 1 | 1  | 1  | 1  | 1.20 | 0.96 | 1.04 | 0.85 |      |      |      |      | 1047 | 115.1 | 6.06  |

|        |                                                                                                                                                                    |       |   |    |    |    |      |      |      |      |      |      |      |      |      |       |       |      |     |      |       |
|--------|--------------------------------------------------------------------------------------------------------------------------------------------------------------------|-------|---|----|----|----|------|------|------|------|------|------|------|------|------|-------|-------|------|-----|------|-------|
| Q5SSQ6 | Suppressor APC domain-containing protein 1 OS=Homo sapiens GN=SAPCD1 PE=2 SV=2 - [SAPC1_HUMAN]                                                                     | 5.41  | 1 | 1  | 1  | 1  |      |      |      |      |      |      |      |      | 0.96 | 0.99  | 0.66  | 0.69 | 148 | 16.6 | 8.06  |
| Q9Y2Z0 | Suppressor of G2 allele of SKP1 homolog OS=Homo sapiens GN=SUGT1 PE=1 SV=3 - [SUGT1_HUMAN]                                                                         | 14.52 | 1 | 3  | 3  | 11 | 1.08 | 0.88 | 0.99 | 0.81 | 0.73 | 1.21 | 0.42 | 0.90 | 365  | 41.0  | 5.16  |      |     |      |       |
| Q9BRV8 | Suppressor of IKBKE 1 OS=Homo sapiens GN=SIKE1 PE=1 SV=1 - [SIKE1_HUMAN]                                                                                           | 5.80  | 1 | 1  | 1  | 1  |      |      |      |      |      |      |      |      | 0.92 | 1.30  | 0.83  | 1.18 | 207 | 23.7 | 5.21  |
| Q9NQ55 | Suppressor of SWI4 1 homolog OS=Homo sapiens GN=PPAN PE=1 SV=1 - [SSF1_HUMAN]                                                                                      | 3.59  | 1 | 1  | 1  | 15 | 1.13 | 1.18 | 1.10 | 1.09 |      |      |      |      |      |       |       |      | 473 | 53.2 | 10.13 |
| Q6UWP8 | Suprabasin OS=Homo sapiens GN=SBSN PE=2 SV=1 - [SBSN_HUMAN]                                                                                                        | 25.51 | 1 | 5  | 5  | 28 | 0.97 | 1.00 | 1.03 | 1.05 | 0.99 | 1.03 | 1.01 | 1.06 | 247  | 25.3  | 7.08  |      |     |      |       |
| Q6UW10 | Surfactant-associated protein 2 OS=Homo sapiens GN=SFTA2 PE=1 SV=1 - [SFTA2_HUMAN]                                                                                 | 11.54 | 1 | 1  | 1  | 3  | 0.58 | 0.40 | 1.10 | 0.78 | 1.07 | 0.92 | 1.23 | 1.05 | 78   | 8.4   | 7.56  |      |     |      |       |
| Q8IWZ8 | SURP and G-patch domain-containing protein 1 OS=Homo sapiens GN=SUGP1 PE=1 SV=2 - [SUGP1_HUMAN]                                                                    | 4.19  | 1 | 1  | 1  | 2  | 1.08 | 1.07 |      |      |      |      |      |      | 645  | 72.4  | 7.61  |      |     |      |       |
| Q9UH64 | Susceptibility protein NSG-x OS=Homo sapiens GN=C9orf53 PE=1 SV=1 - [NSGX_HUMAN]                                                                                   | 18.99 | 1 | 1  | 1  | 1  | 0.37 | 0.36 | 1.23 | 1.18 |      |      |      |      | 79   | 8.8   | 11.58 |      |     |      |       |
| Q6UWL2 | Sushi domain-containing protein 1 OS=Homo sapiens GN=SUSD1 PE=1 SV=1 - [SUSD1_HUMAN]                                                                               | 3.48  | 1 | 2  | 2  | 5  | 1.04 | 1.00 | 1.09 | 1.06 | 0.98 | 0.96 | 0.84 | 0.82 | 747  | 82.7  | 6.43  |      |     |      |       |
| O60279 | Sushi domain-containing protein 5 OS=Homo sapiens GN=SUSD5 PE=1 SV=3 - [SUSD5_HUMAN]                                                                               | 1.27  | 1 | 1  | 1  | 2  | 1.09 | 1.09 | 1.07 | 1.08 |      |      |      |      | 629  | 68.0  | 4.91  |      |     |      |       |
| P78539 | Sushi repeat-containing protein SRPX OS=Homo sapiens GN=SRPX PE=2 SV=1 - [SRPX_HUMAN]                                                                              | 3.23  | 1 | 1  | 1  | 2  |      |      |      |      | 0.50 | 0.42 | 0.58 | 0.49 | 464  | 51.5  | 8.66  |      |     |      |       |
| O60687 | Sushi repeat-containing protein SRPX2 OS=Homo sapiens GN=SRPX2 PE=1 SV=1 - [SRPX2_HUMAN]                                                                           | 2.80  | 1 | 1  | 1  | 3  | 0.97 | 1.08 | 1.06 | 1.17 | 0.51 | 1.03 | 1.07 | 2.17 | 465  | 52.9  | 7.25  |      |     |      |       |
| Q8TER0 | Sushi, nidogen and EGF-like domain-containing protein 1 OS=Homo sapiens GN=SNED1 PE=1 SV=2 - [SNED1_HUMAN]                                                         | 3.75  | 1 | 4  | 4  | 5  | 0.56 | 0.87 | 0.62 | 0.85 | 1.16 | 1.00 | 1.15 | 0.99 | 1413 | 152.1 | 6.98  |      |     |      |       |
| Q4LDE5 | Sushi, von Willebrand factor type A, EGF and pentraxin domain-containing protein 1 OS=Homo sapiens GN=SVEP1 PE=1 SV=3 - [SVEP1_HUMAN]                              | 5.49  | 1 | 16 | 16 | 37 | 1.69 | 1.65 | 1.61 | 1.60 | 1.79 | 2.20 | 1.85 | 2.27 | 3571 | 389.9 | 5.50  |      |     |      |       |
| Q92922 | SWI/SNF complex subunit SMARCC1 OS=Homo sapiens GN=SMARCC1 PE=1 SV=3 - [SMRC1_HUMAN]                                                                               | 1.36  | 1 | 1  | 1  | 1  |      |      |      |      | 1.00 | 1.19 | 0.89 | 1.05 | 1105 | 122.8 | 5.76  |      |     |      |       |
| Q9H4L7 | SWI/SNF-related matrix-associated actin-dependent regulator of chromatin subfamily A containing DEAD/H box 1 OS=Homo sapiens GN=SMARCAD1 PE=1 SV=2 - [SMRCD_HUMAN] | 2.34  | 1 | 1  | 1  | 1  | 0.43 | 0.28 | 0.39 | 0.26 |      |      |      |      | 1026 | 117.3 | 5.55  |      |     |      |       |
| O60264 | SWI/SNF-related matrix-associated actin-dependent regulator of chromatin subfamily A member 5 OS=Homo sapiens GN=SMARCA5 PE=1 SV=1 - [SMCA5_HUMAN]                 | 2.28  | 1 | 2  | 2  | 3  | 1.40 | 1.16 | 1.61 | 1.35 |      |      |      |      | 1052 | 121.8 | 8.09  |      |     |      |       |
| Q9NZC9 | SWI/SNF-related matrix-associated actin-dependent regulator of chromatin subfamily A-like protein 1 OS=Homo sapiens GN=SMARCAL1 PE=1 SV=1 - [SMAL1_HUMAN]          | 1.47  | 1 | 1  | 1  | 1  | 0.75 | 0.78 | 0.57 | 0.60 |      |      |      |      | 954  | 105.9 | 9.06  |      |     |      |       |
| Q12824 | SWI/SNF-related matrix-associated actin-dependent regulator of chromatin subfamily B member 1 OS=Homo sapiens GN=SMARCB1 PE=1 SV=2 - [SNF5_HUMAN]                  | 5.45  | 1 | 1  | 1  | 30 | 1.03 | 0.99 | 1.13 | 1.11 | 1.11 | 1.18 | 1.31 | 1.36 | 385  | 44.1  | 6.23  |      |     |      |       |
| Q96GM5 | SWI/SNF-related matrix-associated actin-dependent regulator of chromatin subfamily D member 1 OS=Homo sapiens GN=SMARCD1 PE=1 SV=2 - [SMRD1_HUMAN]                 | 7.57  | 1 | 1  | 1  | 1  | 1.38 | 1.82 | 1.55 | 2.05 |      |      |      |      | 515  | 58.2  | 9.25  |      |     |      |       |
| Q9P0W2 | SWI/SNF-related matrix-associated actin-dependent regulator of chromatin subfamily E member 1-related OS=Homo sapiens GN=HMG20B PE=1 SV=1 - [HM20B_HUMAN]          | 3.47  | 1 | 1  | 1  | 1  | 0.42 | 0.67 | 0.87 | 1.41 |      |      |      |      | 317  | 35.8  | 9.35  |      |     |      |       |
| Q86XK3 | Swi5-dependent recombination DNA repair protein 1 homolog OS=Homo sapiens GN=SFR1 PE=1 SV=2 - [SFR1_HUMAN]                                                         | 5.71  | 1 | 1  | 1  | 1  |      |      |      |      | 0.71 | 0.59 | 0.92 | 0.76 | 245  | 28.2  | 6.39  |      |     |      |       |
| Q92797 | Symplekin OS=Homo sapiens GN=SYMPK PE=1 SV=2 - [SYMPK_HUMAN]                                                                                                       | 1.18  | 4 | 1  | 2  | 98 | 1.15 | 1.31 | 1.10 | 1.18 | 1.05 | 0.93 | 0.93 | 0.83 | 1274 | 141.1 | 6.13  |      |     |      |       |
| Q8N4V2 | Synaptic vesicle 2-related protein OS=Homo sapiens GN=SVOP PE=2 SV=1 - [SVOP_HUMAN]                                                                                | 2.55  | 1 | 1  | 1  | 1  |      |      |      |      | 0.92 | 0.83 | 1.13 | 1.02 | 548  | 60.7  | 5.78  |      |     |      |       |
| Q7L1I2 | Synaptic vesicle glycoprotein 2B OS=Homo sapiens GN=SV2B PE=2 SV=1 - [SV2B_HUMAN]                                                                                  | 1.76  | 1 | 1  | 1  | 1  | 1.07 | 0.33 | 0.68 | 0.21 |      |      |      |      | 683  | 77.4  | 5.44  |      |     |      |       |
| Q99536 | Synaptic vesicle membrane protein VAT-1 homolog OS=Homo sapiens GN=VAT1 PE=1 SV=2 - [VAT1_HUMAN]                                                                   | 5.60  | 2 | 2  | 2  | 2  | 0.90 | 0.82 | 0.98 | 0.90 |      |      |      |      | 393  | 41.9  | 6.29  |      |     |      |       |
| O15498 | Synaptobrevin homolog YKT6 OS=Homo sapiens GN=YKT6 PE=1 SV=1 - [YKT6_HUMAN]                                                                                        | 6.57  | 1 | 1  | 1  | 1  |      |      |      |      | 0.87 | 0.85 | 0.89 | 0.86 | 198  | 22.4  | 6.92  |      |     |      |       |

|        |                                                                                        |       |   |   |   |    |      |      |      |      |      |      |      |      |      |       |      |
|--------|----------------------------------------------------------------------------------------|-------|---|---|---|----|------|------|------|------|------|------|------|------|------|-------|------|
| O43759 | Synaptogyrin-1 OS=Homo sapiens GN=SYNGR1 PE=1 SV=2 - [SNG1_HUMAN]                      | 9.87  | 1 | 1 | 1 | 1  | 1.36 | 1.21 | 1.31 | 1.17 |      | 233  | 25.4 | 4.68 |      |       |      |
| O95473 | Synaptogyrin-4 OS=Homo sapiens GN=SYNGR4 PE=2 SV=2 - [SNG4_HUMAN]                      | 6.41  | 1 | 1 | 1 | 1  | 1.10 | 1.11 | 1.24 | 1.24 |      | 234  | 25.8 | 7.75 |      |       |      |
| O43426 | Synaptojanin-1 OS=Homo sapiens GN=SYNJ1 PE=1 SV=2 - [SYNJ1_HUMAN]                      | 5.66  | 1 | 5 | 5 | 9  | 1.01 | 1.08 | 0.89 | 0.95 | 0.58 | 1.01 | 0.61 | 1.19 | 1573 | 173.0 | 7.42 |
| Q9BX26 | Synaptonemal complex protein 2 OS=Homo sapiens GN=SYCP2 PE=2 SV=2 - [SYCP2_HUMAN]      | 0.98  | 1 | 1 | 1 | 2  |      |      |      |      | 0.29 | 0.15 | 0.81 | 0.42 | 1530 | 175.5 | 8.85 |
| Q8IZU3 | Synaptonemal complex protein 3 OS=Homo sapiens GN=SYCP3 PE=1 SV=1 - [SYCP3_HUMAN]      | 2.97  | 1 | 1 | 1 | 1  |      |      |      |      | 0.51 | 1.45 | 0.29 | 0.82 | 236  | 27.7  | 9.23 |
| Q8N3V7 | Synaptopodin OS=Homo sapiens GN=SYNPO PE=1 SV=2 - [SYNPO_HUMAN]                        | 3.34  | 1 | 1 | 1 | 2  |      |      |      |      | 0.70 | 0.68 | 0.79 | 0.78 | 929  | 99.4  | 8.72 |
| O00161 | Synaptosomal-associated protein 23 OS=Homo sapiens GN=SNAP23 PE=1 SV=1 - [SNP23_HUMAN] | 4.74  | 1 | 1 | 1 | 3  |      |      |      |      | 3.71 | 2.97 | 3.45 | 2.75 | 211  | 23.3  | 5.01 |
| P60880 | Synaptosomal-associated protein 25 OS=Homo sapiens GN=SNAP25 PE=1 SV=1 - [SNP25_HUMAN] | 3.40  | 1 | 1 | 1 | 2  | 0.79 | 0.76 | 0.76 | 0.73 |      |      |      |      | 206  | 23.3  | 4.77 |
| O95721 | Synaptosomal-associated protein 29 OS=Homo sapiens GN=SNAP29 PE=1 SV=1 - [SNP29_HUMAN] | 4.65  | 1 | 1 | 1 | 3  |      |      |      |      | 1.82 | 2.17 | 1.68 | 1.99 | 258  | 29.0  | 5.81 |
| Q9BT88 | Synaptotagmin-11 OS=Homo sapiens GN=SYT11 PE=1 SV=2 - [SYT11_HUMAN]                    | 3.94  | 1 | 1 | 1 | 1  |      |      |      |      | 1.07 | 1.04 | 1.00 | 0.97 | 431  | 48.3  | 9.04 |
| Q9BQS2 | Synaptotagmin-15 OS=Homo sapiens GN=SYT15 PE=1 SV=3 - [SYT15_HUMAN]                    | 6.65  | 1 | 1 | 1 | 6  |      |      |      | 0.92 |      |      |      |      | 421  | 47.3  | 7.40 |
| Q9BSW7 | Synaptotagmin-17 OS=Homo sapiens GN=SYT17 PE=1 SV=1 - [SYT17_HUMAN]                    | 2.95  | 1 | 1 | 1 | 1  |      |      |      |      | 0.93 | 0.69 | 0.77 | 0.57 | 474  | 53.8  | 7.50 |
| Q96C24 | Synaptotagmin-like protein 4 OS=Homo sapiens GN=SYTL4 PE=1 SV=2 - [SYTL4_HUMAN]        | 6.41  | 1 | 2 | 2 | 4  |      |      |      |      | 1.67 | 1.44 | 1.20 | 1.03 | 671  | 76.0  | 8.98 |
| Q8TDW5 | Synaptotagmin-like protein 5 OS=Homo sapiens GN=SYTL5 PE=1 SV=1 - [SYTL5_HUMAN]        | 2.88  | 1 | 1 | 1 | 1  |      |      |      |      | 1.86 | 1.53 | 1.47 | 1.21 | 730  | 81.5  | 8.78 |
| P31431 | Syndecan-4 OS=Homo sapiens GN=SDC4 PE=1 SV=2 - [SDC4_HUMAN]                            | 7.07  | 1 | 1 | 1 | 7  | 1.65 | 1.40 | 1.60 | 1.37 | 1.31 | 1.15 | 1.31 | 1.15 | 198  | 21.6  | 4.50 |
| Q9UMZ2 | Synergina gamma OS=Homo sapiens GN=SYNRG PE=1 SV=2 - [SYNRG_HUMAN]                     | 4.11  | 1 | 4 | 4 | 4  | 0.91 | 0.93 | 0.79 | 0.80 | 0.90 | 1.08 | 0.84 | 1.00 | 1314 | 140.6 | 5.03 |
| Q9Y6H5 | Synphilin-1 OS=Homo sapiens GN=SNCAIP PE=1 SV=2 - [SNCAP_HUMAN]                        | 1.63  | 1 | 2 | 2 | 2  | 1.06 | 1.04 | 1.13 | 1.11 | 0.76 | 0.91 | 0.76 | 0.90 | 919  | 100.3 | 6.34 |
| O75558 | Syntaxin-11 OS=Homo sapiens GN=STX11 PE=2 SV=1 - [STX11_HUMAN]                         | 3.14  | 1 | 1 | 1 | 3  |      |      |      |      | 6.98 | 8.02 | 6.26 | 7.18 | 287  | 33.2  | 6.55 |
| O14662 | Syntaxin-16 OS=Homo sapiens GN=STX16 PE=1 SV=3 - [STX16_HUMAN]                         | 9.23  | 1 | 1 | 1 | 2  | 0.79 | 0.65 | 0.96 | 0.80 |      |      |      |      | 325  | 37.0  | 6.11 |
| P56962 | Syntaxin-17 OS=Homo sapiens GN=STX17 PE=1 SV=2 - [STX17_HUMAN]                         | 6.62  | 1 | 1 | 1 | 1  |      |      |      |      | 1.10 | 1.26 | 0.81 | 0.92 | 302  | 33.4  | 6.57 |
| Q9P2W9 | Syntaxin-18 OS=Homo sapiens GN=STX18 PE=1 SV=1 - [STX18_HUMAN]                         | 2.39  | 1 | 1 | 1 | 1  | 0.50 | 0.63 | 0.93 | 1.16 |      |      |      |      | 335  | 38.6  | 5.49 |
| O15400 | Syntaxin-7 OS=Homo sapiens GN=STX7 PE=1 SV=4 - [STX7_HUMAN]                            | 23.37 | 1 | 5 | 5 | 12 |      |      |      |      | 1.06 | 1.05 | 1.03 | 1.02 | 261  | 29.8  | 5.55 |
| P61764 | Syntaxin-binding protein 1 OS=Homo sapiens GN=STXBP1 PE=1 SV=1 - [STXB1_HUMAN]         | 5.05  | 1 | 2 | 2 | 13 | 0.88 | 0.81 | 0.67 | 0.64 | 0.97 | 0.84 | 1.10 | 0.95 | 594  | 67.5  | 6.96 |
| Q15833 | Syntaxin-binding protein 2 OS=Homo sapiens GN=STXBP2 PE=1 SV=2 - [STXB2_HUMAN]         | 2.87  | 1 | 1 | 1 | 4  | 1.11 | 1.13 | 1.09 | 1.11 | 0.70 | 0.81 | 0.58 | 0.67 | 593  | 66.4  | 6.55 |
| O00560 | Syntenin-1 OS=Homo sapiens GN=SDCBP PE=1 SV=1 - [SDCB1_HUMAN]                          | 3.36  | 1 | 1 | 1 | 1  |      |      |      |      | 0.94 | 0.86 | 1.01 | 0.93 | 298  | 32.4  | 7.53 |
| Q16650 | T-box brain protein 1 OS=Homo sapiens GN=TBR1 PE=1 SV=1 - [TBR1_HUMAN]                 | 1.32  | 2 | 1 | 1 | 1  | 0.77 | 1.14 | 0.84 | 1.26 |      |      |      |      | 682  | 74.0  | 7.33 |
| Q9UMR3 | T-box transcription factor TBX20 OS=Homo sapiens GN=TBX20 PE=1 SV=4 - [TBX20_HUMAN]    | 5.82  | 1 | 2 | 2 | 3  | 0.84 | 0.71 | 0.86 | 0.73 | 0.93 | 0.84 | 0.79 | 0.71 | 447  | 49.2  | 7.71 |

|        |                                                                                                                                               |       |   |     |     |     |      |      |      |      |      |      |       |       |      |       |       |
|--------|-----------------------------------------------------------------------------------------------------------------------------------------------|-------|---|-----|-----|-----|------|------|------|------|------|------|-------|-------|------|-------|-------|
| O15119 | T-box transcription factor TBX3 OS=Homo sapiens GN=TBX3 PE=1 SV=4 - [TBX3_HUMAN]                                                              | 4.17  | 1 | 1   | 1   | 1   | 1.14 | 1.49 | 1.04 | 1.36 |      | 743  | 79.3  | 8.16  |      |       |       |
| Q8N103 | T-cell activation Rho GTPase-activating protein OS=Homo sapiens GN=TAGAP PE=2 SV=1 - [TAGAP_HUMAN]                                            | 1.23  | 7 | 1   | 2   | 6   |      |      |      |      | 1.20 | 0.57 | 0.81  | 0.38  | 731  | 80.7  | 6.47  |
| Q96H15 | T-cell immunoglobulin and mucin domain-containing protein 4 OS=Homo sapiens GN=TIMD4 PE=1 SV=2 - [TIMD4_HUMAN]                                | 2.38  | 1 | 1   | 1   | 1   | 1.05 | 0.85 | 1.02 | 0.82 |      | 378  | 41.6  | 6.10  |      |       |       |
| P56279 | T-cell leukemia/lymphoma protein 1A OS=Homo sapiens GN=TCL1A PE=1 SV=1 - [TCL1A_HUMAN]                                                        | 5.26  | 1 | 1   | 1   | 1   |      |      |      |      | 1.60 | 1.35 | ###   | 11.55 | 114  | 13.5  | 5.11  |
| P04436 | T-cell receptor alpha chain V region HPB-MLT (Fragment) OS=Homo sapiens PE=2 SV=1 - [TVA1_HUMAN]                                              | 14.50 | 1 | 1   | 1   | 3   | 0.77 | 0.65 | 0.75 | 0.64 | 1.23 | 1.01 | 1.34  | 1.09  | 131  | 14.8  | 5.48  |
| P17987 | T-complex protein 1 subunit alpha OS=Homo sapiens GN=TCP1 PE=1 SV=1 - [TCPA_HUMAN]                                                            | 11.87 | 4 | 3   | 4   | 100 | 1.37 | 1.53 | 1.40 | 1.58 | 1.33 | 0.95 | 1.07  | 0.77  | 556  | 60.3  | 6.11  |
| P48643 | T-complex protein 1 subunit epsilon OS=Homo sapiens GN=CCT5 PE=1 SV=1 - [TCPE_HUMAN]                                                          | 4.62  | 1 | 1   | 1   | 1   | 1.09 | 1.09 | 1.10 | 1.11 |      | 541  | 59.6  | 5.66  |      |       |       |
| Q99832 | T-complex protein 1 subunit eta OS=Homo sapiens GN=CCT7 PE=1 SV=2 - [TCPH_HUMAN]                                                              | 2.03  | 1 | 1   | 1   | 1   |      |      |      |      | 0.68 | 0.50 | 0.99  | 0.72  | 543  | 59.3  | 7.65  |
| P49368 | T-complex protein 1 subunit gamma OS=Homo sapiens GN=CCT3 PE=1 SV=4 - [TCPG_HUMAN]                                                            | 3.49  | 1 | 2   | 2   | 3   |      |      |      |      | 0.76 | 0.63 | 0.72  | 0.60  | 545  | 60.5  | 6.49  |
| Q8TDR4 | T-complex protein 10A homolog 2 OS=Homo sapiens GN=TCP10L PE=1 SV=1 - [TCP1L_HUMAN]                                                           | 6.05  | 1 | 1   | 1   | 1   |      |      |      |      | 0.82 | 0.81 | 0.81  | 0.81  | 215  | 23.8  | 9.67  |
| Q9NUJ3 | T-complex protein 11-like protein 1 OS=Homo sapiens GN=TCP11L1 PE=1 SV=1 - [T11L1_HUMAN]                                                      | 4.52  | 1 | 1   | 1   | 2   |      |      |      |      | 1.29 | 1.36 | 1.17  | 1.23  | 509  | 57.0  | 5.59  |
| Q96NA8 | t-SNARE domain-containing protein 1 OS=Homo sapiens GN=TSNARE1 PE=2 SV=2 - [TSNA1_HUMAN]                                                      | 1.95  | 1 | 1   | 1   | 1   |      |      |      |      | 1.23 | 1.21 | 1.24  | 1.22  | 513  | 55.9  | 9.01  |
| Q9Y6J9 | TAF6-like RNA polymerase II p300/CBP-associated factor-associated factor 65 kDa subunit 6L OS=Homo sapiens GN=TAF6L PE=1 SV=1 - [TAF6L_HUMAN] | 2.41  | 1 | 1   | 1   | 1   | 1.85 | 1.85 | 2.05 | 2.05 |      | 622  | 67.8  | 8.97  |      |       |       |
| Q9Y490 | Talin-1 OS=Homo sapiens GN=TLN1 PE=1 SV=3 - [TLN1_HUMAN]                                                                                      | 54.82 | 4 | 104 | 104 | 851 | 0.62 | 0.57 | 0.59 | 0.56 | 1.05 | 1.02 | 0.99  | 0.99  | 2541 | 269.6 | 6.07  |
| O95271 | Tankyrase-1 OS=Homo sapiens GN=TNKS PE=1 SV=2 - [TNKS1_HUMAN]                                                                                 | 0.68  | 1 | 1   | 1   | 1   | 1.05 | 1.21 | 1.05 | 1.21 |      | 1327 | 142.0 | 7.05  |      |       |       |
| Q7Z7G0 | Target of Nesh-SH3 OS=Homo sapiens GN=ABI3BP PE=1 SV=1 - [TARSH_HUMAN]                                                                        | 4.00  | 1 | 4   | 4   | 11  | 0.98 | 1.04 | 1.02 | 1.07 | 0.85 | 0.88 | 0.84  | 0.87  | 1075 | 118.6 | 9.44  |
| Q9BPZ7 | Target of rapamycin complex 2 subunit MAPKAP1 OS=Homo sapiens GN=MAPKAP1 PE=1 SV=2 - [SIN1_HUMAN]                                             | 2.87  | 1 | 1   | 1   | 1   |      |      |      |      | 1.28 | 1.32 | 1.25  | 1.28  | 522  | 59.1  | 7.55  |
| P59539 | Taste receptor type 2 member 45 OS=Homo sapiens GN=TAS2R45 PE=2 SV=1 - [T2R45_HUMAN]                                                          | 3.68  | 2 | 1   | 1   | 2   |      |      |      |      | 1.22 | 1.34 | 1.13  | 1.24  | 299  | 34.3  | 10.04 |
| P59540 | Taste receptor type 2 member 46 OS=Homo sapiens GN=TAS2R46 PE=2 SV=2 - [T2R46_HUMAN]                                                          | 11.33 | 1 | 1   | 1   | 1   |      |      |      |      | 1.04 | 0.79 | 1.13  | 0.86  | 309  | 35.5  | 9.76  |
| Q9NYW2 | Taste receptor type 2 member 8 OS=Homo sapiens GN=TAS2R8 PE=1 SV=1 - [TA2R8_HUMAN]                                                            | 1.62  | 1 | 1   | 1   | 1   | 0.88 | 0.99 | 0.84 | 0.95 |      | 309  | 35.9  | 9.61  |      |       |       |
| P82094 | TATA element modulatory factor OS=Homo sapiens GN=TMF1 PE=1 SV=2 - [TMF1_HUMAN]                                                               | 1.10  | 1 | 1   | 1   | 1   |      |      |      |      | 1.39 | 1.05 | 1.37  | 1.04  | 1093 | 122.8 | 4.92  |
| O14981 | TATA-binding protein-associated factor 172 OS=Homo sapiens GN=BTAF1 PE=1 SV=2 - [BTAF1_HUMAN]                                                 | 0.43  | 1 | 1   | 1   | 2   | 0.83 | 0.88 | 0.81 | 0.87 |      | 1849 | 206.8 | 6.52  |      |       |       |
| Q5TCY1 | Tau-tubulin kinase 1 OS=Homo sapiens GN=TTBK1 PE=1 SV=2 - [TTBK1_HUMAN]                                                                       | 3.41  | 1 | 2   | 2   | 2   | 0.61 | 0.57 | 0.72 | 0.67 |      | 1321 | 142.6 | 5.60  |      |       |       |
| Q9BXI6 | TBC1 domain family member 10A OS=Homo sapiens GN=TBC1D10A PE=1 SV=1 - [TB10A_HUMAN]                                                           | 6.69  | 1 | 1   | 1   | 1   |      |      |      |      | 0.70 | 0.61 | 0.47  | 0.40  | 508  | 57.1  | 8.44  |
| Q4KMP7 | TBC1 domain family member 10B OS=Homo sapiens GN=TBC1D10B PE=1 SV=3 - [TB10B_HUMAN]                                                           | 2.60  | 1 | 1   | 1   | 3   |      |      |      |      | 1.03 | 1.15 | 1.18  | 1.32  | 808  | 87.1  | 9.19  |
| Q96BZ9 | TBC1 domain family member 20 OS=Homo sapiens GN=TBC1D20 PE=1 SV=1 - [TBC20_HUMAN]                                                             | 1.74  | 1 | 1   | 1   | 1   |      |      |      |      | 0.71 | 2.09 | 403   | 45.8  | 6.86 |       |       |
| Q9BYX2 | TBC1 domain family member 2A OS=Homo sapiens GN=TBC1D2 PE=1 SV=3 - [TBD2A_HUMAN]                                                              | 0.86  | 1 | 1   | 1   | 2   | 1.33 | 1.55 | 1.30 | 1.52 | 1.57 | 1.55 | 1.27  | 1.26  | 928  | 105.3 | 6.58  |

|        |                                                                                                                      |       |   |    |    |     |      |      |      |      |      |      |      |      |      |       |      |      |      |
|--------|----------------------------------------------------------------------------------------------------------------------|-------|---|----|----|-----|------|------|------|------|------|------|------|------|------|-------|------|------|------|
| Q92609 | TBC1 domain family member 5 OS=Homo sapiens<br>GN=TBC1D5 PE=1 SV=1 - [TBCD5_HUMAN]                                   | 1.64  | 1 | 1  | 1  | 1   | 1.67 | 1.89 | 1.64 | 1.87 |      |      |      |      |      |       | 795  | 88.9 | 6.54 |
| O95759 | TBC1 domain family member 8 OS=Homo sapiens<br>GN=TBC1D8 PE=1 SV=3 - [TBCD8_HUMAN]                                   | 1.67  | 1 | 1  | 1  | 3   | 0.15 | 0.12 | 0.23 | 0.20 | 0.95 | 0.94 | 0.72 | 0.72 | 1140 | 130.8 | 5.52 |      |      |
| Q0IIM8 | TBC1 domain family member 8B OS=Homo sapiens<br>GN=TBC1D8B PE=2 SV=2 - [TBC8B_HUMAN]                                 | 1.52  | 1 | 1  | 1  | 1   |      |      |      |      | 2.00 | 2.85 | 1.96 | 2.79 | 1120 | 128.6 | 5.95 |      |      |
| Q66K14 | TBC1 domain family member 9B OS=Homo sapiens<br>GN=TBC1D9B PE=1 SV=3 - [TBC9B_HUMAN]                                 | 0.72  | 1 | 1  | 1  | 1   | 1.12 | 1.01 | 1.11 | 1.01 |      |      |      |      | 1250 | 140.4 | 5.25 |      |      |
| P0C1Z6 | TCF3 fusion partner OS=Homo sapiens GN=TFPT PE=1<br>SV=1 - [TFPT_HUMAN]                                              | 7.51  | 1 | 1  | 1  | 1   | 0.99 | 1.14 | 0.89 | 1.03 |      |      |      |      | 253  | 28.3  | 5.21 |      |      |
| Q6ZSZ6 | Teashirt homolog 1 OS=Homo sapiens GN=TSHZ1 PE=2<br>SV=2 - [TSH1_HUMAN]                                              | 3.99  | 1 | 2  | 2  | 6   |      |      |      |      | 0.65 | 1.25 | 0.52 | 0.99 | 1077 | 117.8 | 7.06 |      |      |
| O15040 | Tectonin beta-propeller repeat-containing protein 2 OS=Homo sapiens<br>GN=TECPR2 PE=1 SV=4 - [TCPR2_HUMAN]           | 0.64  | 1 | 1  | 1  | 2   |      |      |      |      | 0.75 | 0.67 | 0.72 | 0.64 | 1411 | 153.8 | 5.55 |      |      |
| Q96M29 | Tektin-5 OS=Homo sapiens GN=TEKT5 PE=2 SV=1 -<br>[TEKT5_HUMAN]                                                       | 2.68  | 1 | 1  | 1  | 1   | 0.57 | 0.51 | 0.77 | 0.69 |      |      |      |      | 485  | 56.3  | 7.14 |      |      |
| Q99973 | Telomerase protein component 1 OS=Homo sapiens<br>GN=TEP1 PE=1 SV=2 - [TEP1_HUMAN]                                   | 1.29  | 1 | 2  | 2  | 2   |      |      |      |      | 0.86 | 0.79 | 0.94 | 0.68 | 2627 | 290.3 | 7.97 |      |      |
| Q9Y4R8 | Telomere length regulation protein TEL2 homolog OS=Homo sapiens<br>GN=TELO2 PE=1 SV=2 - [TELO2_HUMAN]                | 0.84  | 1 | 1  | 1  | 2   |      |      |      |      | 0.38 | 0.42 | 0.36 | 0.39 | 837  | 91.7  | 5.76 |      |      |
| Q5UIP0 | Telomere-associated protein RIF1 OS=Homo sapiens<br>GN=RIF1 PE=1 SV=2 - [RIF1_HUMAN]                                 | 1.38  | 1 | 2  | 2  | 3   | 1.32 | 4.98 | 1.08 | 4.10 |      |      |      |      | 2472 | 274.3 | 5.52 |      |      |
| P24821 | Tenascin OS=Homo sapiens GN=TNC PE=1 SV=3 -<br>[TENA_HUMAN]                                                          | 9.86  | 1 | 16 | 16 | 38  | 0.92 | 0.95 | 0.89 | 0.89 |      |      |      |      | 2201 | 240.7 | 4.89 |      |      |
| Q9UQP3 | Tenascin-N OS=Homo sapiens GN=TNN PE=1 SV=2 -<br>[TENN_HUMAN]                                                        | 7.16  | 1 | 6  | 6  | 12  | 0.95 | 0.87 | 0.96 | 0.90 | 0.55 | 0.66 | 0.54 | 0.65 | 1299 | 143.9 | 5.63 |      |      |
| Q92752 | Tenascin-R OS=Homo sapiens GN=TNR PE=1 SV=3 -<br>[TENR_HUMAN]                                                        | 4.79  | 1 | 3  | 4  | 6   |      |      |      |      | 1.19 | 1.05 | 0.95 | 0.83 | 1358 | 149.5 | 4.82 |      |      |
| P22105 | Tenascin-X OS=Homo sapiens GN=TNXB PE=1 SV=3 -<br>[TENX_HUMAN]                                                       | 15.27 | 2 | 36 | 36 | 114 | 0.98 | 0.99 | 0.97 | 1.00 | 0.91 | 0.97 | 0.87 | 0.91 | 4289 | 464.0 | 5.34 |      |      |
| Q9NT68 | Teneurin-2 OS=Homo sapiens GN=ODZ2 PE=1 SV=3 -<br>[TEN2_HUMAN]                                                       | 1.66  | 1 | 2  | 2  | 3   |      |      |      |      | 2.64 | 2.94 | 2.21 | 2.46 | 2774 | 307.6 | 6.68 |      |      |
| Q9P273 | Teneurin-3 OS=Homo sapiens GN=ODZ3 PE=2 SV=3 -<br>[TEN3_HUMAN]                                                       | 2.70  | 1 | 3  | 4  | 5   |      |      |      |      | 0.80 | 0.47 | 0.58 | 0.42 | 2699 | 300.8 | 6.42 |      |      |
| Q9H2S6 | Tenomodulin OS=Homo sapiens GN=TNMD PE=2 SV=1 -<br>[TNMD_HUMAN]                                                      | 4.42  | 1 | 1  | 1  | 1   |      |      |      |      | 1.02 | 1.16 | 1.02 | 1.16 | 317  | 37.1  | 5.19 |      |      |
| Q9HBL0 | Tensin-1 OS=Homo sapiens GN=TNS1 PE=1 SV=2 -<br>[TENS1_HUMAN]                                                        | 1.21  | 1 | 1  | 1  | 1   | 0.97 | 0.97 | 0.97 | 0.98 |      |      |      |      | 1735 | 185.6 | 7.75 |      |      |
| Q8IZW8 | Tensin-4 OS=Homo sapiens GN=TNS4 PE=1 SV=3 -<br>[TENS4_HUMAN]                                                        | 1.82  | 1 | 1  | 1  | 1   | 0.86 | 0.79 | 1.10 | 1.01 |      |      |      |      | 715  | 76.7  | 7.34 |      |      |
| Q5TAX3 | Terminal uridylyltransferase 4 OS=Homo sapiens<br>GN=ZCCHC11 PE=1 SV=3 - [TUT4_HUMAN]                                | 1.40  | 1 | 1  | 1  | 2   | 1.03 | 1.15 | 1.43 | 1.60 | 0.67 | 0.95 | 0.58 | 0.82 | 1644 | 185.0 | 7.97 |      |      |
| Q8N9V7 | Testis- and ovary-specific PAZ domain-containing protein 1<br>OS=Homo sapiens GN=TOPAZ1 PE=2 SV=3 -<br>[TOPZ1_HUMAN] | 2.36  | 1 | 2  | 2  | 2   | 1.52 | 1.10 | 0.74 | 0.55 | 2.92 | 3.19 | 3.18 | 3.47 | 1692 | 190.8 | 7.87 |      |      |
| Q9NXF1 | Testis-expressed sequence 10 protein OS=Homo sapiens<br>GN=TEX10 PE=1 SV=2 - [TEX10_HUMAN]                           | 1.40  | 1 | 1  | 1  | 2   | 0.72 | 0.71 | 0.67 | 0.66 |      |      |      |      | 929  | 105.6 | 9.36 |      |      |
| Q9BXU3 | Testis-expressed sequence 13A protein OS=Homo sapiens<br>GN=TEX13A PE=2 SV=1 - [TX13A_HUMAN]                         | 2.69  | 1 | 1  | 1  | 1   |      |      |      |      | 1.31 | 1.30 | 1.08 | 1.08 | 409  | 45.6  | 5.53 |      |      |
| Q9BXT5 | Testis-expressed sequence 15 protein OS=Homo sapiens<br>GN=TEX15 PE=1 SV=2 - [TEX15_HUMAN]                           | 2.33  | 5 | 3  | 5  | 7   | 1.29 | 0.89 | 0.81 | 0.79 |      |      |      |      | 2789 | 315.1 | 6.19 |      |      |
| Q8IWB9 | Testis-expressed sequence 2 protein OS=Homo sapiens<br>GN=TEX2 PE=1 SV=2 - [TEX2_HUMAN]                              | 7.19  | 1 | 2  | 2  | 2   | 0.47 | 0.17 | 0.86 | 0.31 |      |      |      |      | 1127 | 125.2 | 6.01 |      |      |
| Q8N6V9 | Testis-expressed sequence 9 protein OS=Homo sapiens<br>GN=TEX9 PE=2 SV=1 - [TEX9_HUMAN]                              | 4.60  | 1 | 1  | 1  | 2   | 1.01 | 0.95 | 0.88 | 0.83 |      |      |      |      | 391  | 44.8  | 6.60 |      |      |

|        |                                                                                                         |       |   |    |    |     |      |      |      |      |      |      |      |       |      |       |      |
|--------|---------------------------------------------------------------------------------------------------------|-------|---|----|----|-----|------|------|------|------|------|------|------|-------|------|-------|------|
| Q9Y6F8 | Testis-specific chromodomain protein Y 1 OS=Homo sapiens<br>GN=CDY1 PE=1 SV=1 - [CDY1_HUMAN]            | 4.63  | 1 | 1  | 1  | 1   | 0.61 | 0.53 | 0.96 | 0.83 |      | 540  | 60.4 | 9.10  |      |       |      |
| Q9BZW7 | Testis-specific gene 10 protein OS=Homo sapiens<br>GN=TSGA10 PE=1 SV=1 - [TSG10_HUMAN]                  | 3.01  | 1 | 2  | 2  | 5   |      |      | 0.95 | 1.04 | 1.10 | 1.13 | 698  | 81.4  | 5.97 |       |      |
| Q3SY00 | Testis-specific protein 10-interacting protein OS=Homo sapiens<br>GN=TSGA10IP PE=2 SV=1 - [T10IP_HUMAN] | 2.70  | 1 | 1  | 1  | 2   | 0.75 | 0.82 | 0.78 | 0.85 |      | 556  | 62.3 | 10.05 |      |       |      |
| Q96PF2 | Testis-specific serine/threonine-protein kinase 2 OS=Homo sapiens<br>GN=TSSK2 PE=1 SV=2 - [TSSK2_HUMAN] | 3.91  | 1 | 1  | 1  | 1   |      |      | 0.50 | 0.81 | 0.83 | 1.32 | 358  | 40.9  | 8.84 |       |      |
| Q6SA08 | Testis-specific serine/threonine-protein kinase 4 OS=Homo sapiens<br>GN=TSSK4 PE=1 SV=1 - [TSSK4_HUMAN] | 2.74  | 1 | 1  | 1  | 2   |      |      | 1.18 | 1.44 | 0.93 | 1.10 | 328  | 37.4  | 8.57 |       |      |
| A2RUG3 | Testis-specific XK-related protein, Y-linked 2 OS=Homo sapiens<br>GN=XKRY2 PE=2 SV=2 - [XKRY2_HUMAN]    | 24.79 | 2 | 1  | 1  | 1   | 0.63 | 0.85 | 0.85 | 1.15 |      | 117  | 13.0 | 8.68  |      |       |      |
| Q9H0U9 | Testis-specific Y-encoded-like protein 1 OS=Homo sapiens<br>GN=TSPYL1 PE=1 SV=3 - [TSPYL1_HUMAN]        | 5.03  | 1 | 2  | 2  | 2   | 1.15 | 0.60 | 0.95 | 0.50 | 0.89 | 0.79 | 0.96 | 0.85  | 437  | 49.2  | 5.45 |
| Q8N831 | Testis-specific Y-encoded-like protein 6 OS=Homo sapiens<br>GN=TSPYL6 PE=2 SV=1 - [TSPYL6_HUMAN]        | 2.44  | 1 | 1  | 1  | 1   |      |      | 1.12 | 0.75 | 1.02 | 0.68 | 410  | 45.8  | 5.68 |       |      |
| P05452 | Tetranectin OS=Homo sapiens GN=CLEC3B PE=1 SV=3 - [TETN_HUMAN]                                          | 77.23 | 1 | 13 | 13 | 180 | 0.81 | 0.82 | 0.82 | 0.83 | 1.16 | 0.94 | 1.14 | 0.98  | 202  | 22.5  | 5.67 |
| O60636 | Tetraspanin-2 OS=Homo sapiens GN=TSPAN2 PE=2 SV=2 - [TSN2_HUMAN]                                        | 2.71  | 1 | 1  | 1  | 1   | 0.98 | 1.03 | 0.92 | 0.96 |      |      | 221  | 24.1  | 7.77 |       |      |
| Q96N46 | Tetratricopeptide repeat protein 14 OS=Homo sapiens<br>GN=TTC14 PE=1 SV=1 - [TTC14_HUMAN]               | 2.47  | 1 | 2  | 2  | 3   | 0.74 | 0.60 | 0.84 | 0.68 |      |      | 770  | 88.3  | 8.63 |       |      |
| Q8NEE8 | Tetratricopeptide repeat protein 16 OS=Homo sapiens<br>GN=TTC16 PE=2 SV=2 - [TTC16_HUMAN]               | 3.67  | 1 | 2  | 2  | 2   | 0.76 | 0.74 | 0.86 | 0.83 |      |      | 873  | 98.2  | 9.01 |       |      |
| Q96AE7 | Tetratricopeptide repeat protein 17 OS=Homo sapiens<br>GN=TTC17 PE=1 SV=1 - [TTC17_HUMAN]               | 1.58  | 2 | 1  | 2  | 3   | 0.12 | 0.06 | 0.23 | 0.12 |      |      | 1141 | 129.5 | 6.58 |       |      |
| Q8NDW8 | Tetratricopeptide repeat protein 21A OS=Homo sapiens<br>GN=TTC21A PE=2 SV=3 - [TTC21A_HUMAN]            | 1.59  | 1 | 2  | 2  | 2   | 0.61 | 0.64 | 0.68 | 0.72 | 1.12 | 1.52 | 0.82 | 1.12  | 1320 | 150.8 | 7.24 |
| Q7Z4L5 | Tetratricopeptide repeat protein 21B OS=Homo sapiens<br>GN=TTC21B PE=1 SV=2 - [TTC21B_HUMAN]            | 0.53  | 1 | 1  | 1  | 1   |      |      | 0.59 | 0.72 | 0.55 | 0.67 | 1316 | 150.8 | 6.96 |       |      |
| Q6PF05 | Tetratricopeptide repeat protein 23-like OS=Homo sapiens<br>GN=TTC23L PE=2 SV=2 - [TTC23L_HUMAN]        | 4.99  | 1 | 1  | 1  | 1   | 0.84 | 0.83 | 0.99 | 0.97 |      |      | 361  | 40.8  | 7.24 |       |      |
| A2A3L6 | Tetratricopeptide repeat protein 24 OS=Homo sapiens<br>GN=TTC24 PE=2 SV=1 - [TTC24_HUMAN]               | 1.89  | 1 | 1  | 1  | 1   |      |      | 1.85 | 0.33 |      |      | 582  | 63.4  | 9.25 |       |      |
| Q96AY4 | Tetratricopeptide repeat protein 28 OS=Homo sapiens<br>GN=TTC28 PE=1 SV=4 - [TTC28_HUMAN]               | 1.65  | 1 | 2  | 2  | 2   | 1.18 | 1.04 | 1.15 | 1.05 |      |      | 2481 | 270.7 | 6.89 |       |      |
| Q6PID6 | Tetratricopeptide repeat protein 33 OS=Homo sapiens<br>GN=TTC33 PE=1 SV=2 - [TTC33_HUMAN]               | 6.49  | 1 | 1  | 1  | 1   |      |      | 1.39 | 2.18 | 0.80 | 1.25 | 262  | 29.4  | 5.44 |       |      |
| A8MYJ7 | Tetratricopeptide repeat protein 34 OS=Homo sapiens<br>GN=TTC34 PE=2 SV=2 - [TTC34_HUMAN]               | 4.42  | 1 | 1  | 1  | 2   | 1.98 | 1.22 | 0.96 | 0.73 |      |      | 566  | 60.9  | 7.33 |       |      |
| A6NLP5 | Tetratricopeptide repeat protein 36 OS=Homo sapiens<br>GN=TTC36 PE=2 SV=1 - [TTC36_HUMAN]               | 7.41  | 1 | 1  | 1  | 1   |      |      | 1.22 | 1.86 | 1.42 | 2.16 | 189  | 20.9  | 5.12 |       |      |
| Q6PGP7 | Tetratricopeptide repeat protein 37 OS=Homo sapiens<br>GN=TTC37 PE=1 SV=1 - [TTC37_HUMAN]               | 1.79  | 1 | 1  | 2  | 2   | 0.69 | 0.74 | 0.85 | 0.92 |      |      | 1564 | 175.4 | 7.53 |       |      |
| Q5R3I4 | Tetratricopeptide repeat protein 38 OS=Homo sapiens<br>GN=TTC38 PE=1 SV=1 - [TTC38_HUMAN]               | 4.26  | 1 | 1  | 1  | 1   |      |      | 1.06 | 0.76 | 1.21 | 0.86 | 469  | 52.8  | 5.99 |       |      |
| Q8IYW2 | Tetratricopeptide repeat protein 40 OS=Homo sapiens<br>GN=TTC40 PE=2 SV=3 - [TTC40_HUMAN]               | 2.98  | 5 | 4  | 4  | 9   | 1.23 | 1.39 | 1.26 | 1.54 | 1.02 | 1.09 | 0.87 | 0.93  | 2715 | 303.3 | 7.36 |
| Q8N0Z6 | Tetratricopeptide repeat protein 5 OS=Homo sapiens<br>GN=TTC5 PE=1 SV=2 - [TTC5_HUMAN]                  | 3.41  | 1 | 1  | 1  | 1   | 1.45 | 1.21 | 1.16 | 0.98 |      |      | 440  | 48.9  | 6.48 |       |      |
| Q9ULT0 | Tetratricopeptide repeat protein 7A OS=Homo sapiens<br>GN=TTC7A PE=1 SV=3 - [TTC7A_HUMAN]               | 2.33  | 1 | 2  | 2  | 2   | 1.09 | 1.29 | 1.15 | 1.38 |      |      | 858  | 96.1  | 6.46 |       |      |
| Q6P2S7 | Tetratricopeptide repeat protein GNN OS=Homo sapiens<br>GN=GNN PE=2 SV=3 - [GNN_HUMAN]                  | 1.67  | 1 | 1  | 1  | 5   |      |      | 0.99 | 0.72 | 1.16 | 1.00 | 1318 | 151.6 | 8.25 |       |      |



|        |                                                                                                                  |       |   |    |    |     |      |      |      |      |      |      |      |      |      |       |       |      |
|--------|------------------------------------------------------------------------------------------------------------------|-------|---|----|----|-----|------|------|------|------|------|------|------|------|------|-------|-------|------|
| Q8N5C8 | TGF-beta-activated kinase 1 and MAP3K7-binding protein 3<br>OS=Homo sapiens GN=TAB3 PE=1 SV=2 - [TAB3_HUMAN]     | 1.40  | 1 | 1  | 1  | 3   |      |      |      |      |      | 1.23 | 1.06 | 1.18 | 1.06 | 712   | 78.6  | 8.46 |
| Q8WY91 | THAP domain-containing protein 4 OS=Homo sapiens<br>GN=THAP4 PE=1 SV=2 - [THAP4_HUMAN]                           | 1.91  | 6 | 1  | 2  | 96  | 0.87 | 1.25 | 0.71 | 1.02 |      |      |      |      |      | 577   | 62.9  | 9.28 |
| Q7Z6K1 | THAP domain-containing protein 5 OS=Homo sapiens<br>GN=THAP5 PE=1 SV=2 - [THAP5_HUMAN]                           | 4.05  | 1 | 1  | 1  | 1   |      |      | 0.27 | 0.13 |      |      |      |      |      | 395   | 45.4  | 6.71 |
| Q5T1C6 | Thioesterase superfamily member 4 OS=Homo sapiens<br>GN=THEM4 PE=1 SV=1 - [THEM4_HUMAN]                          | 3.33  | 1 | 1  | 1  | 1   |      |      |      |      |      | 0.93 | 0.89 | 0.89 | 0.85 | 240   | 27.1  | 8.28 |
| Q14894 | Thiomorpholine-carboxylate dehydrogenase OS=Homo sapiens<br>GN=CRYM PE=1 SV=1 - [CRYM_HUMAN]                     | 4.14  | 1 | 1  | 1  | 10  | 1.44 | 1.54 | 1.46 | 1.57 | 1.53 | 1.64 | 1.32 | 1.47 | 314  | 33.8  | 5.14  |      |
| Q6PKC3 | Thioredoxin domain-containing protein 11 OS=Homo sapiens<br>GN=TXNDC11 PE=1 SV=2 - [TXD11_HUMAN]                 | 2.74  | 1 | 1  | 1  | 1   | 1.16 | 1.34 | 1.23 | 1.43 |      |      |      |      |      | 985   | 110.5 | 6.55 |
| O95881 | Thioredoxin domain-containing protein 12 OS=Homo sapiens<br>GN=TXNDC12 PE=1 SV=1 - [TXD12_HUMAN]                 | 5.23  | 1 | 1  | 1  | 1   |      |      |      |      |      | 0.68 |      | 0.73 | 172  | 19.2  | 5.40  |      |
| Q9P2K2 | Thioredoxin domain-containing protein 16 OS=Homo sapiens<br>GN=TXNDC16 PE=2 SV=4 - [TXD16_HUMAN]                 | 2.91  | 1 | 1  | 1  | 1   |      |      |      |      |      | 0.76 | 0.95 | 0.80 | 1.00 | 825   | 93.5  | 5.21 |
| Q9BRA2 | Thioredoxin domain-containing protein 17 OS=Homo sapiens<br>GN=TXNDC17 PE=1 SV=1 - [TXD17_HUMAN]                 | 11.38 | 1 | 1  | 1  | 2   |      |      |      |      |      | 1.28 | 1.14 | 1.30 | 1.16 | 123   | 13.9  | 5.52 |
| Q8NBS9 | Thioredoxin domain-containing protein 5 OS=Homo sapiens<br>GN=TXNDC5 PE=1 SV=2 - [TXND5_HUMAN]                   | 12.96 | 1 | 2  | 2  | 2   |      |      |      |      |      | 0.97 | 1.17 | 0.75 | 1.21 | 432   | 47.6  | 5.97 |
| P10599 | Thioredoxin OS=Homo sapiens GN=TXN PE=1 SV=3 -<br>[THIO_HUMAN]                                                   | 49.52 | 1 | 5  | 5  | 34  | 1.11 | 0.99 | 0.95 | 0.84 | 1.03 | 0.93 | 0.99 | 0.95 | 105  | 11.7  | 4.92  |      |
| P30048 | Thioredoxin-dependent peroxide reductase, mitochondrial<br>OS=Homo sapiens GN=PRDX3 PE=1 SV=3 -<br>[PRDX3_HUMAN] | 6.64  | 1 | 1  | 1  | 1   |      |      |      |      |      | 1.14 | 0.45 | 1.11 | 0.44 | 256   | 27.7  | 7.78 |
| Q9H1E5 | Thioredoxin-related transmembrane protein 4 OS=Homo sapiens<br>GN=TMX4 PE=1 SV=1 - [TMX4_HUMAN]                  | 4.87  | 1 | 1  | 1  | 1   | 0.87 | 0.81 | 1.03 | 0.98 |      |      |      |      |      | 349   | 38.9  | 4.37 |
| Q8NI27 | THO complex subunit 2 OS=Homo sapiens GN=THOC2 PE=1<br>SV=2 - [THOC2_HUMAN]                                      | 1.57  | 1 | 1  | 1  | 1   | 1.59 | 1.07 | 1.24 | 0.83 |      |      |      |      |      | 1593  | 182.7 | 8.44 |
| P26639 | Threonine-tRNA ligase, cytoplasmic OS=Homo sapiens<br>GN=TARS PE=1 SV=3 - [SYTC_HUMAN]                           | 2.21  | 2 | 1  | 1  | 5   | 1.21 | 1.10 | 1.22 | 1.12 | 0.78 | 0.80 | 0.79 | 0.82 | 723  | 83.4  | 6.67  |      |
| P07996 | Thrombospondin-1 OS=Homo sapiens GN=THBS1 PE=1<br>SV=2 - [TSP1_HUMAN]                                            | 43.76 | 1 | 38 | 41 | 582 | 1.13 | 1.15 | 1.15 | 1.14 | 0.97 | 1.02 | 1.02 | 1.02 | 1170 | 129.3 | 4.94  |      |
| P35442 | Thrombospondin-2 OS=Homo sapiens GN=THBS2 PE=1<br>SV=2 - [TSP2_HUMAN]                                            | 4.27  | 1 | 2  | 4  | 48  | 0.65 | 0.61 | 0.67 | 0.63 | 0.85 | 0.93 | 0.89 | 0.97 | 1172 | 129.9 | 4.83  |      |
| P49746 | Thrombospondin-3 OS=Homo sapiens GN=THBS3 PE=1<br>SV=1 - [TSP3_HUMAN]                                            | 2.72  | 1 | 1  | 3  | 14  |      |      |      |      |      | 1.21 | 0.77 | 1.67 | 1.06 | 956   | 104.1 | 4.65 |
| P35443 | Thrombospondin-4 OS=Homo sapiens GN=THBS4 PE=1<br>SV=2 - [TSP4_HUMAN]                                            | 14.98 | 1 | 6  | 8  | 44  | 0.63 | 0.59 | 0.64 | 0.61 | 0.90 | 0.94 | 0.99 | 0.97 | 961  | 105.8 | 4.68  |      |
| P24557 | Thromboxane-A synthase OS=Homo sapiens GN=TBXAS1<br>PE=1 SV=3 - [THAS_HUMAN]                                     | 3.75  | 1 | 1  | 1  | 8   | 0.95 | 0.95 | 0.94 | 0.89 |      |      |      |      |      | 533   | 60.5  | 7.62 |
| Q9NXG2 | THUMP domain-containing protein 1 OS=Homo sapiens<br>GN=THUMP1 PE=1 SV=2 - [THUM1_HUMAN]                         | 4.25  | 1 | 1  | 1  | 1   | 1.26 | 1.12 | 1.24 | 1.11 |      |      |      |      |      | 353   | 39.3  | 7.88 |
| P04216 | Thy-1 membrane glycoprotein OS=Homo sapiens GN=THY1<br>PE=1 SV=2 - [THY1_HUMAN]                                  | 19.88 | 1 | 2  | 2  | 3   |      |      |      |      |      | 1.02 | 1.01 | 2.11 | 2.08 | 161   | 17.9  | 8.73 |
| P19971 | Thymidine phosphorylase OS=Homo sapiens GN=TYMP<br>PE=1 SV=2 - [TYPH_HUMAN]                                      | 3.53  | 1 | 1  | 1  | 2   |      |      |      |      |      | 0.58 | 0.74 | 0.50 | 0.64 | 482   | 49.9  | 5.53 |
| P62328 | Thymosin beta-4 OS=Homo sapiens GN=TMSB4X PE=1<br>SV=2 - [TYB4_HUMAN]                                            | 70.45 | 2 | 6  | 6  | 47  |      |      |      |      |      | 2.03 | 1.99 | 1.93 | 1.95 | 44    | 5.0   | 5.06 |
| Q6YHU6 | Thyroid adenoma-associated protein OS=Homo sapiens<br>GN=THADA PE=1 SV=1 - [THADA_HUMAN]                         | 1.69  | 1 | 2  | 2  | 2   | 0.62 | 0.79 | 0.69 | 0.89 | 0.68 | 1.03 | 0.46 | 0.70 | 1953 | 219.5 | 6.06  |      |
| P10827 | Thyroid hormone receptor alpha OS=Homo sapiens<br>GN=THRA PE=1 SV=1 - [THA_HUMAN]                                | 4.08  | 1 | 1  | 1  | 2   |      |      |      |      |      | 0.61 | 1.02 | 0.64 | 1.08 | 490   | 54.8  | 6.86 |
| Q15643 | Thyroid receptor-interacting protein 11 OS=Homo sapiens<br>GN=TRIP11 PE=1 SV=3 - [TRIPB_HUMAN]                   | 4.35  | 1 | 5  | 6  | 10  | 1.80 | 2.43 | 1.15 | 1.56 | 1.29 | 1.30 | 1.27 | 1.24 | 1979 | 227.4 | 5.26  |      |

|        |                                                                                                       |       |   |    |    |     |      |      |      |      |      |      |      |      |       |       |       |
|--------|-------------------------------------------------------------------------------------------------------|-------|---|----|----|-----|------|------|------|------|------|------|------|------|-------|-------|-------|
| Q10587 | Thyrotroph embryonic factor OS=Homo sapiens GN=TEF PE=2 SV=3 - [TEF_HUMAN]                            | 10.89 | 1 | 1  | 1  | 2   | 1.14 | 1.21 | 1.02 | 1.09 |      |      |      |      | 303   | 33.2  | 6.05  |
| P01222 | Thyrotropin subunit beta OS=Homo sapiens GN=TSHB PE=1 SV=2 - [TSHB_HUMAN]                             | 29.71 | 1 | 2  | 2  | 2   |      |      |      |      | 0.65 | 0.09 | 0.52 | 0.07 | 138   | 15.6  | 7.69  |
| Q9UKU6 | Thyrotropin-releasing hormone-degrading ectoenzyme OS=Homo sapiens GN=TRHDE PE=2 SV=1 - [TRHDE_HUMAN] | 1.27  | 1 | 1  | 1  | 2   |      |      |      |      | 0.89 | 0.76 | 0.90 | 0.32 | 1024  | 116.9 | 6.99  |
| P05543 | Thyroxine-binding globulin OS=Homo sapiens GN=SERPINA7 PE=1 SV=2 - [TBHG_HUMAN]                       | 54.22 | 1 | 23 | 23 | 354 | 1.25 | 1.30 | 1.23 | 1.30 | 1.04 | 1.05 | 0.95 | 0.99 | 415   | 46.3  | 6.30  |
| Q6NT04 | Tigger transposable element-derived protein 7 OS=Homo sapiens GN=TIGD7 PE=2 SV=1 - [TIGD7_HUMAN]      | 1.46  | 1 | 1  | 1  | 3   |      |      |      |      | 1.60 | 1.55 | 1.49 | 1.44 | 549   | 63.2  | 8.75  |
| Q07157 | Tight junction protein ZO-1 OS=Homo sapiens GN=TJP1 PE=1 SV=3 - [ZO1_HUMAN]                           | 1.37  | 1 | 1  | 1  | 1   | 0.76 | 0.79 | 0.77 | 0.81 |      |      |      |      | 1748  | 195.3 | 6.70  |
| Q9UDY2 | Tight junction protein ZO-2 OS=Homo sapiens GN=TJP2 PE=1 SV=2 - [ZO2_HUMAN]                           | 3.28  | 1 | 3  | 3  | 14  |      |      |      |      | 1.45 | 1.45 | 1.35 | 1.35 | 1190  | 133.9 | 7.40  |
| Q86XR7 | TIR domain-containing adapter molecule 2 OS=Homo sapiens GN=TICAM2 PE=1 SV=1 - [TCAM2_HUMAN]          | 9.36  | 1 | 1  | 1  | 1   | 1.80 | 0.90 | 1.64 | 0.82 |      |      |      |      | 235   | 26.9  | 5.07  |
| P04066 | Tissue alpha-L-fucosidase OS=Homo sapiens GN=FUCA1 PE=1 SV=4 - [FUCO_HUMAN]                           | 3.65  | 1 | 1  | 2  | 9   | 1.16 | 1.04 | 1.08 | 0.97 | 1.71 | 1.91 | 1.46 | 1.63 | 466   | 53.7  | 6.84  |
| P10646 | Tissue factor pathway inhibitor OS=Homo sapiens GN=TFPI PE=1 SV=1 - [TFPI1_HUMAN]                     | 23.03 | 1 | 4  | 4  | 12  | 1.77 | 1.72 | 1.36 | 1.35 | 1.23 | 1.04 | 1.18 | 1.07 | 304   | 35.0  | 8.25  |
| Q8WZ42 | Titin OS=Homo sapiens GN=TTN PE=1 SV=4 - [TITIN_HUMAN]                                                | 0.54  | 2 | 10 | 12 | 26  | 0.83 | 0.76 | 0.79 | 0.74 | 0.84 | 1.04 | 0.96 | 1.71 | 34350 | ##### | 6.35  |
| Q96CP7 | TLC domain-containing protein 1 OS=Homo sapiens GN=TLCD1 PE=2 SV=1 - [TLCD1_HUMAN]                    | 4.45  | 1 | 1  | 1  | 1   |      |      |      |      | 1.16 | 1.15 | 1.13 | 1.11 | 247   | 28.5  | 9.47  |
| A6NGC4 | TLC domain-containing protein 2 OS=Homo sapiens GN=TLCD2 PE=2 SV=3 - [TLCD2_HUMAN]                    | 7.58  | 1 | 1  | 1  | 4   |      |      |      |      | 1.05 | 0.95 | 1.05 | 0.95 | 264   | 28.7  | 10.10 |
| Q9BX74 | TM2 domain-containing protein 1 OS=Homo sapiens GN=TM2D1 PE=1 SV=1 - [TM2D1_HUMAN]                    | 2.90  | 1 | 1  | 1  | 1   |      |      |      |      | 1.09 | 0.97 | 0.98 | 0.88 | 207   | 22.3  | 6.51  |
| Q13077 | TNF receptor-associated factor 1 OS=Homo sapiens GN=TRAF1 PE=1 SV=1 - [TRAF1_HUMAN]                   | 5.77  | 1 | 2  | 2  | 3   |      |      |      |      | 0.72 | 0.77 | 0.50 | 0.54 | 416   | 46.1  | 6.11  |
| Q13114 | TNF receptor-associated factor 3 OS=Homo sapiens GN=TRAF3 PE=1 SV=2 - [TRAF3_HUMAN]                   | 2.99  | 1 | 1  | 1  | 1   | 2.67 | 2.68 | 2.93 | 2.96 |      |      |      |      | 568   | 64.4  | 7.91  |
| O00463 | TNF receptor-associated factor 5 OS=Homo sapiens GN=TRAF5 PE=1 SV=2 - [TRAF5_HUMAN]                   | 1.97  | 1 | 1  | 1  | 1   | 0.85 | 1.21 | 0.78 | 1.12 |      |      |      |      | 557   | 64.4  | 7.43  |
| Q9H0E2 | Toll-interacting protein OS=Homo sapiens GN=TOLLIP PE=1 SV=1 - [TOLLIP_HUMAN]                         | 7.66  | 1 | 2  | 2  | 2   |      |      |      |      | 1.05 | 1.13 | 1.21 | 1.95 | 274   | 30.3  | 5.97  |
| Q15399 | Toll-like receptor 1 OS=Homo sapiens GN=TLR1 PE=1 SV=3 - [TLR1_HUMAN]                                 | 2.16  | 2 | 2  | 2  | 2   | 0.24 | 0.22 | 0.27 | 0.25 |      |      |      |      | 786   | 90.2  | 7.08  |
| O60603 | Toll-like receptor 2 OS=Homo sapiens GN=TLR2 PE=1 SV=1 - [TLR2_HUMAN]                                 | 3.57  | 4 | 1  | 2  | 3   | 1.33 | 1.51 | 1.38 | 1.58 | 1.79 | 1.45 | 1.47 | 1.19 | 784   | 89.8  | 6.61  |
| O15455 | Toll-like receptor 3 OS=Homo sapiens GN=TLR3 PE=1 SV=1 - [TLR3_HUMAN]                                 | 3.32  | 4 | 2  | 3  | 7   | 0.69 | 0.19 | 0.74 | 0.20 | 2.53 | 2.41 | 1.01 | 0.96 | 904   | 103.8 | 7.18  |
| O60602 | Toll-like receptor 5 OS=Homo sapiens GN=TLR5 PE=1 SV=4 - [TLR5_HUMAN]                                 | 1.63  | 1 | 1  | 1  | 4   | 0.87 | 0.92 | 0.81 | 0.86 |      |      |      |      | 858   | 97.8  | 6.68  |
| Q6ZVM7 | TOM1-like protein 2 OS=Homo sapiens GN=TOM1L2 PE=1 SV=1 - [TM1L2_HUMAN]                               | 1.38  | 1 | 1  | 1  | 1   |      |      |      |      | 1.38 | 1.31 | 1.44 | 1.36 | 507   | 55.5  | 4.79  |
| Q8IYR6 | Tomoregulin-1 OS=Homo sapiens GN=TMEFF1 PE=1 SV=1 - [TEFF1_HUMAN]                                     | 3.95  | 1 | 1  | 1  | 2   |      |      |      |      | 0.81 | 0.17 | 0.85 | 0.33 | 380   | 40.9  | 6.68  |
| Q8NFG8 | Torsin-1A-interacting protein 2 OS=Homo sapiens GN=TOR1AIP2 PE=1 SV=1 - [TOIP2_HUMAN]                 | 3.62  | 1 | 1  | 1  | 1   |      |      |      |      | 0.66 | 0.75 | 1.01 | 1.14 | 470   | 51.2  | 4.96  |
| Q9Y3C4 | TP53RK-binding protein OS=Homo sapiens GN=TPRKB PE=1 SV=1 - [TPRKB_HUMAN]                             | 16.00 | 1 | 1  | 1  | 1   |      |      |      |      | 0.58 | 0.59 |      |      | 175   | 19.6  | 6.79  |
| O15050 | TPR and ankyrin repeat-containing protein 1 OS=Homo sapiens GN=TRANK1 PE=2 SV=4 - [TRNK1_HUMAN]       | 0.55  | 1 | 1  | 1  | 10  | 1.06 | 1.05 | 0.93 | 0.93 |      |      |      |      | 2925  | 336.0 | 6.76  |

|        |                                                                                                                         |       |   |   |   |    |      |      |      |      |      |      |       |      |      |       |      |
|--------|-------------------------------------------------------------------------------------------------------------------------|-------|---|---|---|----|------|------|------|------|------|------|-------|------|------|-------|------|
| Q969N4 | Trace amine-associated receptor 8 OS=Homo sapiens<br>GN=TAAR8 PE=2 SV=1 - [TAAR8_HUMAN]                                 | 2.63  | 1 | 1 | 1 | 1  | 0.93 | 1.05 | 0.89 | 1.02 |      | 342  | 38.0  | 6.81 |      |       |      |
| Q92844 | TRAF family member-associated NF-kappa-B activator<br>OS=Homo sapiens GN=TANK PE=1 SV=2 - [TANK_HUMAN]                  | 3.53  | 1 | 2 | 2 | 2  |      |      |      |      | 0.98 | 0.72 | 0.76  | 0.56 | 425  | 47.8  | 5.68 |
| Q9BWF2 | TRAF-interacting protein OS=Homo sapiens GN=TRAIP PE=1<br>SV=1 - [TRAIP_HUMAN]                                          | 5.54  | 1 | 1 | 2 | 2  | 1.33 | 1.29 | 1.36 | 1.34 |      | 469  | 53.3  | 8.48 |      |       |      |
| Q9UKE5 | TRAF2 and NCK-interacting protein kinase OS=Homo sapiens<br>GN=TNIK PE=1 SV=1 - [TNIK_HUMAN]                            | 4.34  | 1 | 2 | 2 | 3  | 0.72 | 0.65 | 1.10 | 1.01 |      | 1360 | 154.8 | 7.17 |      |       |      |
| Q9Y228 | TRAF3-interacting JNK-activating modulator OS=Homo<br>sapiens GN=TRAF3IP3 PE=1 SV=2 - [T3JAM_HUMAN]                     | 0.91  | 1 | 1 | 1 | 1  | 0.43 | 0.57 | 0.41 | 0.55 |      | 551  | 63.6  | 8.51 |      |       |      |
| Q8TDR0 | TRAF3-interacting protein 1 OS=Homo sapiens<br>GN=TRAF3IP1 PE=1 SV=1 - [MIPT3_HUMAN]                                    | 1.30  | 1 | 1 | 1 | 1  | 0.33 | 0.32 | 0.30 | 0.29 |      | 691  | 78.6  | 7.93 |      |       |      |
| O60296 | Trafficking kinesin-binding protein 2 OS=Homo sapiens<br>GN=TRAK2 PE=1 SV=2 - [TRAK2_HUMAN]                             | 2.19  | 1 | 2 | 2 | 8  | 0.80 | 0.93 | 0.85 | 1.00 | 0.57 | 0.63 | 0.53  | 0.58 | 914  | 101.4 | 5.24 |
| Q9Y5R8 | Trafficking protein particle complex subunit 1 OS=Homo<br>sapiens GN=TRAPPC1 PE=1 SV=1 - [TPPC1_HUMAN]                  | 11.03 | 1 | 1 | 1 | 2  | 1.23 | 1.00 | 1.10 | 0.89 |      | 145  | 16.8  | 9.16 |      |       |      |
| Q7Z392 | Trafficking protein particle complex subunit 11 OS=Homo<br>sapiens GN=TRAPPC11 PE=1 SV=2 - [TPC11_HUMAN]                | 2.29  | 1 | 2 | 2 | 5  | 0.80 | 0.87 | 0.71 | 0.78 | 1.09 | 0.96 | 1.59  | 1.40 | 1133 | 128.8 | 7.14 |
| Q9UL33 | Trafficking protein particle complex subunit 2-like protein<br>OS=Homo sapiens GN=TRAPPC2L PE=1 SV=1 -<br>[TPC2L_HUMAN] | 12.14 | 1 | 1 | 1 | 1  |      |      |      |      | 0.66 | 1.05 | 0.94  | 1.50 | 140  | 16.1  | 6.77 |
| Q9Y2L5 | Trafficking protein particle complex subunit 8 OS=Homo<br>sapiens GN=TRAPPC8 PE=1 SV=2 - [TPPC8_HUMAN]                  | 0.98  | 1 | 1 | 1 | 1  | 0.95 | 0.43 | 0.75 | 0.34 |      | 1435 | 160.9 | 6.87 |      |       |      |
| Q9NZ01 | Trans-2,3-enoyl-CoA reductase OS=Homo sapiens GN=TECR<br>PE=1 SV=1 - [TECR_HUMAN]                                       | 3.25  | 1 | 1 | 1 | 1  | 1.17 | 1.01 | 1.02 | 0.89 |      | 308  | 36.0  | 9.45 |      |       |      |
| P23771 | Trans-acting T-cell-specific transcription factor GATA-3<br>OS=Homo sapiens GN=GATA3 PE=1 SV=1 -<br>[GATA3_HUMAN]       | 8.58  | 1 | 2 | 2 | 3  |      |      |      |      | 1.00 | 0.87 | 0.95  | 0.82 | 443  | 47.9  | 9.42 |
| O43493 | Trans-Golgi network integral membrane protein 2 OS=Homo<br>sapiens GN=TGOLN2 PE=1 SV=2 - [TGON2_HUMAN]                  | 5.83  | 1 | 2 | 2 | 7  | 1.20 | 1.00 | 1.17 | 1.02 |      | 480  | 51.1  | 5.73 |      |       |      |
| P37837 | Transaldolase OS=Homo sapiens GN=TALDO1 PE=1 SV=2 -<br>[TALDO_HUMAN]                                                    | 10.68 | 1 | 4 | 4 | 7  | 0.83 | 0.91 | 0.93 | 1.01 |      | 337  | 37.5  | 6.81 |      |       |      |
| P20061 | Transcobalamin-1 OS=Homo sapiens GN=TCN1 PE=1 SV=2 -<br>[TCO1_HUMAN]                                                    | 1.85  | 1 | 1 | 1 | 2  | 1.40 | 1.42 | 1.45 | 1.48 |      | 433  | 48.2  | 5.03 |      |       |      |
| P51532 | Transcription activator BRG1 OS=Homo sapiens<br>GN=SMARCA4 PE=1 SV=2 - [SMCA4_HUMAN]                                    | 0.91  | 1 | 1 | 1 | 3  | 1.13 | 1.01 | 1.11 | 1.00 | 0.95 | 1.48 | 0.76  | 1.19 | 1647 | 184.5 | 7.88 |
| Q99990 | Transcription cofactor vestigial-like protein 1 OS=Homo<br>sapiens GN=VGLL1 PE=1 SV=1 - [VGLL1_HUMAN]                   | 6.59  | 1 | 1 | 1 | 1  |      |      |      |      | 0.87 | 0.92 | 0.89  | 0.94 | 258  | 28.7  | 9.17 |
| A8MV65 | Transcription cofactor vestigial-like protein 3 OS=Homo<br>sapiens GN=VGLL3 PE=2 SV=1 - [VGLL3_HUMAN]                   | 4.91  | 1 | 1 | 1 | 2  |      |      |      |      | 1.72 | 1.65 | 1.66  | 1.59 | 326  | 36.0  | 6.38 |
| O75764 | Transcription elongation factor A protein 3 OS=Homo sapiens<br>GN=TCEA3 PE=2 SV=2 - [TCEA3_HUMAN]                       | 5.46  | 1 | 1 | 1 | 1  |      |      |      |      | 1.29 | 1.19 | 1.77  | 1.64 | 348  | 38.9  | 9.19 |
| Q7KZ85 | Transcription elongation factor SPT6 OS=Homo sapiens<br>GN=SUPT6H PE=1 SV=2 - [SPT6H_HUMAN]                             | 4.98  | 1 | 5 | 5 | 14 | 0.75 | 0.75 | 0.81 | 0.83 | 0.99 | 0.83 | 0.97  | 0.84 | 1726 | 198.9 | 4.91 |
| Q9Y242 | Transcription factor 19 OS=Homo sapiens GN=TCF19 PE=1<br>SV=2 - [TCF19_HUMAN]                                           | 4.64  | 1 | 1 | 1 | 1  |      |      |      |      | 0.81 | 0.97 | 0.82  | 0.99 | 345  | 37.2  | 8.32 |
| Q9UGU0 | Transcription factor 20 OS=Homo sapiens GN=TCF20 PE=1<br>SV=3 - [TCF20_HUMAN]                                           | 0.36  | 1 | 1 | 1 | 1  |      |      |      |      | 1.93 | 1.49 | 2.14  | 1.65 | 1960 | 211.6 | 9.04 |
| Q6VUC0 | Transcription factor AP-2-epsilon OS=Homo sapiens<br>GN=TFAP2E PE=2 SV=1 - [AP2E_HUMAN]                                 | 1.58  | 1 | 1 | 1 | 2  |      |      |      |      | 0.90 | 1.02 | 0.78  | 0.87 | 442  | 46.2  | 8.37 |
| Q01664 | Transcription factor AP-4 OS=Homo sapiens GN=TFAP4 PE=1<br>SV=2 - [TFAP4_HUMAN]                                         | 3.25  | 1 | 1 | 1 | 1  | 0.49 | 0.22 | 1.01 | 0.44 |      | 338  | 38.7  | 5.87 |      |       |      |
| Q14209 | Transcription factor E2F2 OS=Homo sapiens GN=E2F2 PE=1<br>SV=1 - [E2F2_HUMAN]                                           | 1.37  | 1 | 1 | 1 | 1  |      |      |      |      | 0.90 | 0.42 | 1.12  | 0.53 | 437  | 47.5  | 4.87 |
| Q16254 | Transcription factor E2F4 OS=Homo sapiens GN=E2F4 PE=1<br>SV=2 - [E2F4_HUMAN]                                           | 5.81  | 7 | 1 | 2 | 2  | 1.62 | 1.66 | 1.44 | 1.48 |      | 413  | 43.9  | 4.75 |      |       |      |

|        |                                                                                                          |       |   |   |   |   |      |      |      |      |      |      |      |      |      |       |      |      |
|--------|----------------------------------------------------------------------------------------------------------|-------|---|---|---|---|------|------|------|------|------|------|------|------|------|-------|------|------|
| P19484 | Transcription factor EB OS=Homo sapiens GN=TFEB PE=1 SV=3 - [TFEB_HUMAN]                                 | 4.83  | 1 | 1 | 1 | 1 |      |      |      |      |      | 1.39 | 1.76 | 1.02 | 1.30 | 476   | 52.8 | 6.29 |
| Q9Y603 | Transcription factor ETV7 OS=Homo sapiens GN=ETV7 PE=1 SV=1 - [ETV7_HUMAN]                               | 6.45  | 1 | 1 | 1 | 1 | 1.34 | 1.10 | 1.28 | 1.06 |      |      |      |      |      | 341   | 39.0 | 8.03 |
| Q14469 | Transcription factor HES-1 OS=Homo sapiens GN=HES1 PE=1 SV=1 - [HES1_HUMAN]                              | 5.71  | 1 | 1 | 1 | 3 | 1.41 | 1.22 | 1.34 | 1.17 | 1.50 | 1.91 | 1.21 | 1.55 | 280  | 29.5  | 9.61 |      |
| P17535 | Transcription factor jun-D OS=Homo sapiens GN=JUND PE=1 SV=3 - [JUND_HUMAN]                              | 4.90  | 1 | 1 | 1 | 2 | 1.24 | 1.35 | 1.20 | 1.31 |      |      |      |      | 347  | 35.2  | 7.37 |      |
| P52954 | Transcription factor Lbx1 OS=Homo sapiens GN=Lbx1 PE=2 SV=2 - [Lbx1_HUMAN]                               | 11.39 | 1 | 1 | 1 | 1 | 0.27 | 0.25 | 0.14 | 0.13 |      |      |      |      | 281  | 30.2  | 6.93 |      |
| Q33E94 | Transcription factor RFX4 OS=Homo sapiens GN=RFX4 PE=1 SV=2 - [RFX4_HUMAN]                               | 1.90  | 1 | 1 | 1 | 1 | 0.77 | 0.80 | 0.71 | 0.74 |      |      |      |      | 735  | 83.3  | 6.86 |      |
| Q9UN79 | Transcription factor SOX-13 OS=Homo sapiens GN=SOX13 PE=1 SV=3 - [SOX13_HUMAN]                           | 1.29  | 1 | 1 | 1 | 1 |      |      |      |      | 1.05 | 1.07 | 0.89 | 0.90 | 622  | 69.2  | 6.71 |      |
| Q06945 | Transcription factor SOX-4 OS=Homo sapiens GN=SOX4 PE=1 SV=1 - [SOX4_HUMAN]                              | 4.01  | 1 | 1 | 1 | 1 |      |      |      |      | 1.66 | 1.43 | 1.67 | 1.44 | 474  | 47.2  | 7.36 |      |
| P08047 | Transcription factor Sp1 OS=Homo sapiens GN=SP1 PE=1 SV=3 - [SP1_HUMAN]                                  | 3.57  | 1 | 1 | 1 | 1 | 1.14 | 1.21 | 0.80 | 0.86 |      |      |      |      | 785  | 80.6  | 7.34 |      |
| Q02446 | Transcription factor Sp4 OS=Homo sapiens GN=SP4 PE=1 SV=2 - [SP4_HUMAN]                                  | 3.57  | 1 | 1 | 1 | 1 |      |      |      |      | 2.05 | 2.00 | 1.63 | 1.59 | 784  | 81.9  | 7.05 |      |
| Q3SY56 | Transcription factor Sp6 OS=Homo sapiens GN=SP6 PE=1 SV=1 - [SP6_HUMAN]                                  | 6.12  | 1 | 1 | 1 | 1 |      |      |      |      | 1.85 | 2.02 | 1.97 | 2.13 | 376  | 39.8  | 7.25 |      |
| A6H8Y1 | Transcription factor TFIIIB component B" homolog OS=Homo sapiens GN=BDP1 PE=1 SV=3 - [BDP1_HUMAN]        | 1.64  | 1 | 2 | 2 | 2 | 0.67 | 0.61 |      |      |      |      |      |      | 2624 | 293.7 | 5.11 |      |
| O15391 | Transcription factor YY2 OS=Homo sapiens GN=YY2 PE=2 SV=1 - [YY2_HUMAN]                                  | 1.34  | 1 | 1 | 1 | 2 |      |      |      |      | 1.26 | 0.90 | 1.46 | 1.04 | 372  | 41.3  | 6.18 |      |
| Q00403 | Transcription initiation factor IIB OS=Homo sapiens GN=GTF2B PE=1 SV=1 - [GTF2B_HUMAN]                   | 4.75  | 1 | 1 | 1 | 1 |      |      |      |      | 3.27 | 1.65 | 316  | 34.8 | 8.35 |       |      |      |
| P21675 | Transcription initiation factor TFIIID subunit 1 OS=Homo sapiens GN=TAF1 PE=1 SV=2 - [TAF1_HUMAN]        | 1.23  | 1 | 1 | 1 | 1 | 0.86 | 0.88 | 0.83 | 0.86 |      |      |      |      | 1872 | 212.5 | 5.07 |      |
| Q8IZX4 | Transcription initiation factor TFIIID subunit 1-like OS=Homo sapiens GN=TAF1L PE=1 SV=1 - [TAF1L_HUMAN] | 1.42  | 1 | 1 | 1 | 1 | 1.38 | 1.61 | 1.54 | 1.80 |      |      |      |      | 1826 | 207.2 | 5.40 |      |
| Q6P1X5 | Transcription initiation factor TFIIID subunit 2 OS=Homo sapiens GN=TAF2 PE=1 SV=3 - [TAF2_HUMAN]        | 3.50  | 1 | 2 | 2 | 6 | 0.79 | 0.85 | 0.84 | 0.92 |      |      |      |      | 1199 | 136.9 | 8.19 |      |
| Q92750 | Transcription initiation factor TFIIID subunit 4B OS=Homo sapiens GN=TAF4B PE=1 SV=2 - [TAF4B_HUMAN]     | 1.97  | 1 | 1 | 1 | 2 | 1.02 | 1.03 | 1.05 | 1.06 |      |      |      |      | 862  | 91.0  | 9.54 |      |
| Q15545 | Transcription initiation factor TFIIID subunit 7 OS=Homo sapiens GN=TAF7 PE=1 SV=1 - [TAF7_HUMAN]        | 4.58  | 1 | 1 | 1 | 1 | 0.76 | 0.65 | 0.74 | 0.64 |      |      |      |      | 349  | 40.2  | 5.20 |      |
| Q13263 | Transcription intermediary factor 1-beta OS=Homo sapiens GN=TRIM28 PE=1 SV=5 - [TIF1B_HUMAN]             | 4.55  | 1 | 2 | 2 | 2 | 0.59 | 0.53 | 0.66 | 0.52 |      |      |      |      | 835  | 88.5  | 5.77 |      |
| O14867 | Transcription regulator protein BACH1 OS=Homo sapiens GN=BACH1 PE=1 SV=2 - [BACH1_HUMAN]                 | 5.16  | 1 | 3 | 3 | 8 | 1.69 | 1.33 | 1.77 | 1.40 | 1.33 | 0.97 | 1.01 | 0.72 | 736  | 81.9  | 5.05 |      |
| Q15361 | Transcription termination factor 1 OS=Homo sapiens GN=TTF1 PE=1 SV=3 - [TTF1_HUMAN]                      | 0.77  | 1 | 1 | 1 | 1 |      |      |      |      | 1.00 | 1.20 | 1.79 | 2.13 | 905  | 103.0 | 9.38 |      |
| Q9UNY4 | Transcription termination factor 2 OS=Homo sapiens GN=TTF2 PE=1 SV=2 - [TTF2_HUMAN]                      | 0.69  | 1 | 1 | 1 | 1 |      |      |      |      | 1.00 | 0.67 | 0.98 | 0.66 | 1162 | 129.5 | 8.37 |      |
| P10071 | Transcriptional activator GLI3 OS=Homo sapiens GN=GLI3 PE=1 SV=6 - [GLI3_HUMAN]                          | 1.33  | 1 | 1 | 1 | 1 |      |      |      |      | 1.37 | 1.13 | 1.35 | 1.11 | 1580 | 169.8 | 7.40 |      |
| Q5T5J6 | Transcriptional protein SWI1 OS=Homo sapiens GN=SWI1 PE=2 SV=1 - [SWI1_HUMAN]                            | 4.00  | 1 | 2 | 2 | 6 | 1.34 | 1.49 | 1.27 | 1.46 | 0.81 | 0.71 | 0.97 | 0.85 | 900  | 103.2 | 8.81 |      |
| P46100 | Transcriptional regulator ATRX OS=Homo sapiens GN=ATRAX PE=1 SV=5 - [ATRAX_HUMAN]                        | 2.41  | 2 | 3 | 3 | 3 | 0.90 | 0.79 | 0.93 | 0.82 | 3.14 | 2.88 | 3.65 | 3.34 | 2492 | 282.4 | 6.58 |      |
| P11308 | Transcriptional regulator ERG OS=Homo sapiens GN=ERG PE=1 SV=2 - [ERG_HUMAN]                             | 2.67  | 1 | 1 | 1 | 1 |      |      |      |      | 1.25 | 1.04 | 486  | 54.6 | 7.47 |       |      |      |

|        |                                                                                                                           |       |   |    |    |     |      |      |      |      |      |      |      |      |      |       |      |
|--------|---------------------------------------------------------------------------------------------------------------------------|-------|---|----|----|-----|------|------|------|------|------|------|------|------|------|-------|------|
| Q86T24 | Transcriptional regulator Kaiso OS=Homo sapiens<br>GN=ZBTB33 PE=1 SV=2 - [KAISO_HUMAN]                                    | 3.13  | 1 | 1  | 1  | 4   | 0.88 | 0.79 | 0.91 | 0.83 |      | 672  | 74.4 | 5.12 |      |       |      |
| Q86YP4 | Transcriptional repressor p66-alpha OS=Homo sapiens<br>GN=GATAD2A PE=1 SV=1 - [P66A_HUMAN]                                | 2.37  | 1 | 1  | 1  | 1   | 0.76 | 0.78 | 0.85 | 0.88 |      | 633  | 68.0 | 9.94 |      |       |      |
| Q8WXI9 | Transcriptional repressor p66-beta OS=Homo sapiens<br>GN=GATAD2B PE=1 SV=1 - [P66B_HUMAN]                                 | 3.04  | 1 | 1  | 1  | 1   | 0.79 | 0.80 | 0.65 | 0.67 |      | 593  | 65.2 | 9.70 |      |       |      |
| P02786 | Transferrin receptor protein 1 OS=Homo sapiens GN=TFRC<br>PE=1 SV=2 - [TFR1_HUMAN]                                        | 17.24 | 1 | 11 | 12 | 40  | 0.95 | 0.95 | 0.94 | 0.94 | 0.82 | 0.83 | 0.82 | 0.83 | 760  | 84.8  | 6.61 |
| Q9UP52 | Transferrin receptor protein 2 OS=Homo sapiens GN=TFR2<br>PE=1 SV=1 - [TFR2_HUMAN]                                        | 2.87  | 1 | 1  | 2  | 5   | 1.12 | 0.94 | 1.19 | 0.99 |      | 801  | 88.7 | 6.11 |      |       |      |
| Q9Y4A5 | Transformation/transcription domain-associated protein<br>OS=Homo sapiens GN=TRRAP PE=1 SV=3 -<br>[TRRAP_HUMAN]           | 1.89  | 1 | 4  | 4  | 4   |      |      |      |      | 0.77 | 0.86 | 0.91 | 0.99 | 3859 | 437.3 | 8.19 |
| O75410 | Transforming acidic coiled-coil-containing protein 1 OS=Homo<br>sapiens GN=TACC1 PE=1 SV=2 - [TACC1_HUMAN]                | 4.22  | 1 | 2  | 2  | 8   |      |      |      |      | 1.58 | 1.56 | 1.40 | 1.37 | 805  | 87.7  | 4.88 |
| O95359 | Transforming acidic coiled-coil-containing protein 2 OS=Homo<br>sapiens GN=TACC2 PE=1 SV=3 - [TACC2_HUMAN]                | 3.83  | 7 | 6  | 7  | 17  | 1.12 | 0.88 | 1.06 | 0.84 | 1.11 | 1.00 | 1.14 | 1.07 | 2948 | 309.2 | 4.79 |
| Q03167 | Transforming growth factor beta receptor type 3 OS=Homo<br>sapiens GN=TGFBR3 PE=1 SV=3 - [TGBR3_HUMAN]                    | 5.17  | 1 | 2  | 2  | 3   | 0.94 | 0.94 | 1.07 | 1.12 |      |      |      |      | 851  | 93.4  | 5.71 |
| P01137 | Transforming growth factor beta-1 OS=Homo sapiens<br>GN=TGFB1 PE=1 SV=2 - [TGFB1_HUMAN]                                   | 11.54 | 1 | 3  | 3  | 15  | 1.18 | 1.11 | 1.22 | 1.11 | 1.18 | 1.13 | 1.28 | 1.26 | 390  | 44.3  | 8.53 |
| O43294 | Transforming growth factor beta-1-induced transcript 1 protein<br>OS=Homo sapiens GN=TGFB11 PE=1 SV=2 -<br>[TGF1_HUMAN]   | 3.04  | 1 | 1  | 1  | 3   |      |      |      |      | 1.31 | 1.29 | 1.20 | 1.18 | 461  | 49.8  | 7.03 |
| Q8WUH2 | Transforming growth factor-beta receptor-associated protein 1<br>OS=Homo sapiens GN=TGFBRAP1 PE=1 SV=1 -<br>[TGFA1_HUMAN] | 6.74  | 1 | 3  | 3  | 5   | 1.42 | 1.45 | 1.65 | 1.69 | 1.07 | 1.13 | 1.08 | 1.14 | 860  | 97.1  | 6.55 |
| Q15582 | Transforming growth factor-beta-induced protein ig-h3<br>OS=Homo sapiens GN=TGFBI PE=1 SV=1 - [BGH3_HUMAN]                | 41.58 | 1 | 22 | 22 | 142 | 1.23 | 1.22 | 1.22 | 1.26 | 1.14 | 1.25 | 1.05 | 1.14 | 683  | 74.6  | 7.71 |
| P37802 | Transgellin-2 OS=Homo sapiens GN=TAGLN2 PE=1 SV=3 -<br>[TAGL2_HUMAN]                                                      | 71.36 | 2 | 12 | 12 | 199 | 0.73 | 0.70 | 0.72 | 0.69 | 1.00 | 0.90 | 0.98 | 0.92 | 199  | 22.4  | 8.25 |
| O75762 | Transient receptor potential cation channel subfamily A<br>member 1 OS=Homo sapiens GN=TRPA1 PE=2 SV=3 -<br>[TRPA1_HUMAN] | 1.61  | 4 | 1  | 2  | 8   | 0.62 |      | 0.45 |      |      |      |      |      | 1119 | 127.4 | 7.12 |
| O94759 | Transient receptor potential cation channel subfamily M<br>member 2 OS=Homo sapiens GN=TRPM2 PE=1 SV=2 -<br>[TRPM2_HUMAN] | 2.06  | 1 | 2  | 2  | 2   | 0.09 | 0.62 | 0.05 | 0.74 |      |      |      |      | 1503 | 171.1 | 7.50 |
| Q9HCF6 | Transient receptor potential cation channel subfamily M<br>member 3 OS=Homo sapiens GN=TRPM3 PE=2 SV=4 -<br>[TRPM3_HUMAN] | 1.27  | 1 | 2  | 2  | 2   | 1.10 | 1.18 | 1.11 | 1.20 | 1.28 | 1.33 | 1.03 | 1.07 | 1732 | 197.4 | 7.15 |
| Q9NZQ8 | Transient receptor potential cation channel subfamily M<br>member 5 OS=Homo sapiens GN=TRPM5 PE=1 SV=1 -<br>[TRPM5_HUMAN] | 1.29  | 1 | 1  | 1  | 2   | 0.91 | 0.67 | 0.83 | 0.61 |      |      |      |      | 1165 | 131.4 | 6.77 |
| Q9BX84 | Transient receptor potential cation channel subfamily M<br>member 6 OS=Homo sapiens GN=TRPM6 PE=1 SV=2 -<br>[TRPM6_HUMAN] | 2.37  | 1 | 4  | 4  | 4   | 0.72 | 0.98 | 0.80 | 1.12 | 0.95 | 0.78 | 0.73 | 0.60 | 2022 | 231.6 | 7.77 |
| Q96QT4 | Transient receptor potential cation channel subfamily M<br>member 7 OS=Homo sapiens GN=TRPM7 PE=1 SV=1 -<br>[TRPM7_HUMAN] | 0.64  | 1 | 1  | 1  | 2   | 0.88 | 0.87 | 0.82 | 0.82 |      |      |      |      | 1865 | 212.6 | 7.88 |
| Q9HBA0 | Transient receptor potential cation channel subfamily V<br>member 4 OS=Homo sapiens GN=TRPV4 PE=1 SV=2 -<br>[TRPV4_HUMAN] | 2.76  | 1 | 1  | 1  | 3   | 0.89 | 0.70 | 0.83 | 0.66 | 0.96 | 1.00 | 0.99 | 1.03 | 871  | 98.2  | 7.77 |
| Q9H1D0 | Transient receptor potential cation channel subfamily V<br>member 6 OS=Homo sapiens GN=TRPV6 PE=1 SV=2 -<br>[TRPV6_HUMAN] | 1.38  | 1 | 1  | 1  | 1   |      |      |      |      | 0.89 | 0.99 | 0.74 | 0.82 | 725  | 83.2  | 7.62 |
| P55072 | Transitional endoplasmic reticulum ATPase OS=Homo sapiens<br>GN=VCP PE=1 SV=4 - [TERA_HUMAN]                              | 9.06  | 1 | 5  | 5  | 11  | 0.69 | 0.69 | 0.67 | 0.65 | 0.52 | 0.48 | 0.81 | 0.75 | 806  | 89.3  | 5.26 |
| P29401 | Transketolase OS=Homo sapiens GN=TKT PE=1 SV=3 -<br>[TKT_HUMAN]                                                           | 5.78  | 4 | 2  | 3  | 11  | 1.22 | 1.12 | 1.26 | 1.17 | 0.72 | 0.79 | 0.71 | 0.78 | 623  | 67.8  | 7.66 |
| Q9NR50 | Translation initiation factor eIF-2B subunit gamma OS=Homo<br>sapiens GN=EIF2B3 PE=1 SV=1 - [EI2BG_HUMAN]                 | 7.30  | 1 | 1  | 1  | 1   | 0.76 | 0.86 | 0.92 | 1.05 |      |      |      |      | 452  | 50.2  | 6.47 |
| P46199 | Translation initiation factor IF-2, mitochondrial OS=Homo<br>sapiens GN=MTIF2 PE=1 SV=2 - [IF2M_HUMAN]                    | 4.26  | 1 | 1  | 1  | 1   |      |      |      |      | 0.73 | 1.20 | 0.44 | 0.73 | 727  | 81.3  | 7.15 |
| Q9H2K0 | Translation initiation factor IF-3, mitochondrial OS=Homo<br>sapiens GN=MTIF3 PE=1 SV=4 - [IF3M_HUMAN]                    | 4.68  | 1 | 1  | 1  | 1   |      |      |      |      | 0.95 | 0.92 | 0.87 | 0.84 | 278  | 31.7  | 9.69 |

|        |                                                                                                                  |       |   |   |   |   |      |      |      |      |      |      |      |      |      |       |      |
|--------|------------------------------------------------------------------------------------------------------------------|-------|---|---|---|---|------|------|------|------|------|------|------|------|------|-------|------|
| Q92616 | Translational activator GCN1 OS=Homo sapiens GN=GCN1L1 PE=1 SV=6 - [GCN1L_HUMAN]                                 | 2.06  | 1 | 5 | 5 | 7 | 0.97 | 1.06 | 0.88 | 0.97 | 0.67 | 0.47 | 0.79 | 0.62 | 2671 | 292.6 | 7.47 |
| Q9UGP8 | Translocation protein SEC63 homolog OS=Homo sapiens GN=SEC63 PE=1 SV=2 - [SEC63_HUMAN]                           | 3.03  | 1 | 2 | 2 | 3 | 1.34 | 0.75 | 0.98 | 1.16 | 1.22 | 1.44 |      |      | 760  | 87.9  | 5.31 |
| P43307 | Translocon-associated protein subunit alpha OS=Homo sapiens GN=SSR1 PE=1 SV=3 - [SSRA_HUMAN]                     | 5.24  | 1 | 1 | 1 | 1 |      |      |      | 0.22 | 0.27 | 0.22 | 0.27 |      | 286  | 32.2  | 4.49 |
| Q9H295 | Transmembrane 7 superfamily member 4 OS=Homo sapiens GN=TM7SF4 PE=2 SV=1 - [TM7S4_HUMAN]                         | 2.55  | 1 | 1 | 1 | 2 | 1.22 | 1.33 | 1.03 | 1.12 |      |      |      |      | 470  | 53.4  | 9.29 |
| Q92544 | Transmembrane 9 superfamily member 4 OS=Homo sapiens GN=TM9SF4 PE=1 SV=2 - [TM9S4_HUMAN]                         | 3.74  | 1 | 1 | 1 | 1 | 0.86 | 0.95 | 1.01 | 1.13 |      |      |      |      | 642  | 74.5  | 6.54 |
| Q5TGY1 | Transmembrane and coiled-coil domain-containing protein 4 OS=Homo sapiens GN=TMCO4 PE=2 SV=1 - [TMCO4_HUMAN]     | 3.47  | 1 | 1 | 1 | 1 |      |      |      | 1.42 | 1.07 | 1.67 | 1.26 |      | 634  | 67.9  | 5.85 |
| Q96DC7 | Transmembrane and coiled-coil domain-containing protein 6 OS=Homo sapiens GN=TMCO6 PE=2 SV=2 - [TMCO6_HUMAN]     | 6.29  | 1 | 2 | 2 | 2 | 0.45 | 0.56 | 0.40 | 0.50 | 0.85 | 0.84 | 0.81 | 0.80 | 493  | 54.4  | 5.81 |
| Q9C0B7 | Transmembrane and coiled-coil domain-containing protein 7 OS=Homo sapiens GN=TMCO7 PE=2 SV=2 - [TMCO7_HUMAN]     | 1.37  | 1 | 2 | 2 | 2 | 0.94 | 0.56 | 0.90 | 0.53 | 0.14 | 1.73 | 0.37 | 4.70 | 1094 | 120.7 | 6.11 |
| O75069 | Transmembrane and coiled-coil domains protein 2 OS=Homo sapiens GN=TMCC2 PE=1 SV=3 - [TMCC2_HUMAN]               | 3.10  | 1 | 1 | 1 | 1 | 0.77 | 0.57 | 0.88 | 0.66 |      |      |      |      | 709  | 77.4  | 6.81 |
| Q9ULS5 | Transmembrane and coiled-coil domains protein 3 OS=Homo sapiens GN=TMCC3 PE=2 SV=3 - [TMCC3_HUMAN]               | 7.13  | 1 | 1 | 1 | 1 |      |      |      | 0.23 | 0.13 | 0.65 | 0.39 |      | 477  | 53.8  | 8.54 |
| Q6UXZ0 | Transmembrane and immunoglobulin domain-containing protein 1 OS=Homo sapiens GN=TMIGD1 PE=2 SV=1 - [TMIG1_HUMAN] | 12.60 | 1 | 1 | 1 | 1 | 0.79 | 0.88 | 0.76 | 0.86 |      |      |      |      | 262  | 29.2  | 7.88 |
| Q8IUR5 | Transmembrane and TPR repeat-containing protein 1 OS=Homo sapiens GN=TMTC1 PE=2 SV=3 - [TMTC1_HUMAN]             | 1.13  | 1 | 1 | 1 | 1 |      |      |      | 0.67 | 1.20 | 1.09 | 1.94 |      | 882  | 98.8  | 8.84 |
| Q8N394 | Transmembrane and TPR repeat-containing protein 2 OS=Homo sapiens GN=TMTC2 PE=2 SV=1 - [TMTC2_HUMAN]             | 1.91  | 1 | 1 | 1 | 2 | 1.26 | 0.86 | 1.30 | 0.89 |      |      |      |      | 836  | 94.1  | 8.78 |
| Q7Z5M5 | Transmembrane channel-like protein 3 OS=Homo sapiens GN=TMCC3 PE=1 SV=3 - [TMCC3_HUMAN]                          | 2.73  | 1 | 1 | 2 | 2 |      |      |      | 1.19 | 1.13 | 0.86 | 0.81 |      | 1100 | 125.6 | 9.19 |
| Q13445 | Transmembrane emp24 domain-containing protein 1 OS=Homo sapiens GN=TMED1 PE=1 SV=1 - [TMED1_HUMAN]               | 2.20  | 1 | 1 | 1 | 1 |      |      |      | 0.99 | 1.08 | 0.84 | 0.92 |      | 227  | 25.2  | 4.48 |
| Q9BVK6 | Transmembrane emp24 domain-containing protein 9 OS=Homo sapiens GN=TMED9 PE=1 SV=2 - [TMED9_HUMAN]               | 4.68  | 1 | 1 | 1 | 1 |      |      |      | 0.64 | 0.57 | 0.71 | 0.63 |      | 235  | 27.3  | 8.02 |
| O14668 | Transmembrane gamma-carboxyglutamic acid protein 1 OS=Homo sapiens GN=PRRG1 PE=2 SV=1 - [TMG1_HUMAN]             | 6.88  | 1 | 1 | 1 | 1 |      |      |      | 1.38 | 1.42 | 1.35 | 1.38 |      | 218  | 24.9  | 5.19 |
| Q14956 | Transmembrane glycoprotein NMB OS=Homo sapiens GN=GPNMB PE=1 SV=2 - [GPNMB_HUMAN]                                | 1.75  | 1 | 1 | 1 | 1 | 1.73 | 1.73 | 1.00 | 1.01 |      |      |      |      | 572  | 63.9  | 6.64 |
| Q6ZMR5 | Transmembrane protease serine 11A OS=Homo sapiens GN=TMPRSS11A PE=1 SV=1 - [TM11A_HUMAN]                         | 2.14  | 1 | 1 | 1 | 3 |      |      |      | 0.97 | 1.38 | 1.08 | 1.53 |      | 421  | 47.5  | 9.22 |
| Q86WS5 | Transmembrane protease serine 12 OS=Homo sapiens GN=TMPRSS12 PE=2 SV=2 - [TMPSC_HUMAN]                           | 4.60  | 1 | 1 | 1 | 1 | 1.23 | 0.36 | 1.01 | 0.30 |      |      |      |      | 348  | 38.6  | 8.62 |
| Q9H3S3 | Transmembrane protease serine 5 OS=Homo sapiens GN=TMPRSS5 PE=1 SV=2 - [TMPS5_HUMAN]                             | 2.19  | 1 | 1 | 1 | 1 | 0.90 | 0.93 | 0.97 | 1.00 |      |      |      |      | 457  | 49.5  | 6.71 |
| Q7R7Y8 | Transmembrane protease serine 7 OS=Homo sapiens GN=TMPRSS7 PE=2 SV=3 - [TMPS7_HUMAN]                             | 3.91  | 1 | 1 | 1 | 4 | 0.64 | 0.90 | 0.61 | 0.86 |      |      |      |      | 843  | 94.4  | 8.48 |
| Q86TL2 | Transmembrane protein 110 OS=Homo sapiens GN=TMEM110 PE=2 SV=1 - [TM110_HUMAN]                                   | 5.10  | 1 | 1 | 1 | 1 | 1.00 | 0.95 | 1.04 | 0.99 |      |      |      |      | 294  | 33.2  | 8.15 |
| Q9BTD3 | Transmembrane protein 121 OS=Homo sapiens GN=TMEM121 PE=2 SV=1 - [TM121_HUMAN]                                   | 7.21  | 1 | 1 | 1 | 1 | 1.09 | 0.87 | 1.37 | 1.09 |      |      |      |      | 319  | 35.8  | 9.26 |
| Q9H061 | Transmembrane protein 126A OS=Homo sapiens GN=TMEM126A PE=1 SV=1 - [TM126A_HUMAN]                                | 17.95 | 1 | 1 | 1 | 1 | 1.16 | 1.33 | 1.08 | 1.23 |      |      |      |      | 195  | 21.5  | 9.26 |
| A0AVI4 | Transmembrane protein 129 OS=Homo sapiens GN=TMEM129 PE=2 SV=1 - [TM129_HUMAN]                                   | 2.76  | 1 | 1 | 1 | 1 |      |      |      | 1.61 | 1.11 | 1.38 | 0.95 |      | 362  | 40.4  | 7.66 |
| Q92545 | Transmembrane protein 131 OS=Homo sapiens GN=TMEM131 PE=1 SV=3 - [TM131_HUMAN]                                   | 2.18  | 1 | 2 | 2 | 4 | 1.42 | 1.40 | 1.64 | 1.64 |      |      |      |      | 1883 | 205.0 | 8.59 |

|        |                                                                                         |       |   |   |   |    |      |      |      |      |      |      |       |      |     |      |      |
|--------|-----------------------------------------------------------------------------------------|-------|---|---|---|----|------|------|------|------|------|------|-------|------|-----|------|------|
| A2VDJ0 | Transmembrane protein 131-like OS=Homo sapiens<br>GN=KIAA0922 PE=1 SV=2 - [T131L_HUMAN] | 2.24  | 1 | 2 | 2 | 3  |      | 1.34 | 1.26 | 1.13 | 1.06 | 1609 | 179.2 | 6.86 |     |      |      |
| Q6IEE7 | Transmembrane protein 132E OS=Homo sapiens<br>GN=TMEM132E PE=2 SV=1 - [T132E_HUMAN]     | 1.52  | 1 | 1 | 1 | 1  |      | 1.03 | 1.05 | 0.98 | 1.00 | 984  | 107.0 | 5.90 |     |      |      |
| Q6P9G4 | Transmembrane protein 154 OS=Homo sapiens<br>GN=TMEM154 PE=2 SV=2 - [TM154_HUMAN]       | 6.01  | 1 | 1 | 1 | 1  |      | 1.50 |      |      |      | 183  | 20.5  | 4.53 |     |      |      |
| Q8NDZ6 | Transmembrane protein 161B OS=Homo sapiens<br>GN=TMEM161B PE=2 SV=1 - [T161B_HUMAN]     | 2.26  | 1 | 1 | 1 | 2  |      | 0.63 | 0.10 | 1.19 | 0.20 | 487  | 55.4  | 8.37 |     |      |      |
| Q8NBL3 | Transmembrane protein 178 OS=Homo sapiens<br>GN=TMEM178 PE=2 SV=1 - [TM178_HUMAN]       | 2.36  | 1 | 1 | 1 | 1  |      | 0.86 | 0.95 | 0.70 | 0.78 | 297  | 33.0  | 8.47 |     |      |      |
| Q14CX5 | Transmembrane protein 180 OS=Homo sapiens<br>GN=TMEM180 PE=2 SV=1 - [TM180_HUMAN]       | 2.71  | 1 | 1 | 1 | 3  |      | 0.24 | 0.14 | 0.78 | 0.44 | 517  | 57.3  | 7.97 |     |      |      |
| Q9Y519 | Transmembrane protein 184B OS=Homo sapiens<br>GN=TMEM184B PE=1 SV=2 - [T184B_HUMAN]     | 5.90  | 1 | 1 | 1 | 6  | 0.87 | 1.39 | 0.79 | 1.17 | 1.17 | 1.51 | 1.26  | 1.37 | 407 | 45.5 | 6.89 |
| Q8IY95 | Transmembrane protein 192 OS=Homo sapiens<br>GN=TMEM192 PE=1 SV=1 - [TM192_HUMAN]       | 5.90  | 1 | 1 | 1 | 1  |      | 0.51 | 0.64 | 0.49 | 0.61 | 271  | 30.9  | 7.99 |     |      |      |
| Q68D42 | Transmembrane protein 215 OS=Homo sapiens<br>GN=TMEM215 PE=2 SV=1 - [TM215_HUMAN]       | 2.98  | 1 | 1 | 1 | 1  |      | 0.92 | 0.53 | 1.14 | 0.66 | 235  | 25.8  | 5.34 |     |      |      |
| Q24JQ0 | Transmembrane protein 241 OS=Homo sapiens<br>GN=TMEM241 PE=2 SV=1 - [TM241_HUMAN]       | 5.41  | 1 | 1 | 1 | 1  | 0.96 | 1.02 | 0.91 | 0.98 |      | 296  | 32.6  | 8.66 |     |      |      |
| Q86YD3 | Transmembrane protein 25 OS=Homo sapiens<br>GN=TMEM25 PE=1 SV=1 - [TMM25_HUMAN]         | 1.91  | 1 | 1 | 1 | 1  | 1.22 | 1.06 | 1.21 | 1.07 |      | 366  | 39.3  | 7.50 |     |      |      |
| P57088 | Transmembrane protein 33 OS=Homo sapiens<br>GN=TMEM33 PE=1 SV=2 - [TMM33_HUMAN]         | 2.43  | 1 | 1 | 1 | 1  | 0.73 | 0.66 | 0.77 | 0.71 |      | 247  | 28.0  | 9.70 |     |      |      |
| Q8WWA1 | Transmembrane protein 40 OS=Homo sapiens<br>GN=TMEM40 PE=1 SV=2 - [TMM40_HUMAN]         | 9.44  | 1 | 1 | 1 | 1  |      | 0.94 | 0.50 | 1.42 | 0.75 | 233  | 25.5  | 5.59 |     |      |      |
| Q96HV5 | Transmembrane protein 41A OS=Homo sapiens<br>GN=TMEM41A PE=2 SV=1 - [TM41A_HUMAN]       | 3.79  | 1 | 1 | 1 | 1  |      | 0.56 | 0.57 | 0.67 | 0.68 | 264  | 29.6  | 9.03 |     |      |      |
| O94886 | Transmembrane protein 63A OS=Homo sapiens<br>GN=TMEM63A PE=1 SV=3 - [TM63A_HUMAN]       | 2.60  | 1 | 1 | 1 | 2  |      | 2.25 | 1.54 | 1.62 | 1.11 | 807  | 92.1  | 7.27 |     |      |      |
| Q9BSE2 | Transmembrane protein 79 OS=Homo sapiens<br>GN=TMEM79 PE=1 SV=1 - [TMM79_HUMAN]         | 2.79  | 1 | 1 | 1 | 1  | 1.09 | 1.23 | 1.13 | 1.30 |      | 394  | 43.5  | 4.93 |     |      |      |
| A6NKF7 | Transmembrane protein 88B OS=Homo sapiens<br>GN=TMEM88B PE=3 SV=1 - [TM88B_HUMAN]       | 12.27 | 1 | 1 | 1 | 1  |      | 1.13 | 1.16 | 1.20 | 1.23 | 163  | 17.1  | 8.24 |     |      |      |
| Q9HCN3 | Transmembrane protein 8A OS=Homo sapiens<br>GN=TMEM8A PE=1 SV=3 - [TMM8A_HUMAN]         | 0.91  | 1 | 1 | 1 | 1  |      | 1.13 | 0.83 | 1.04 | 0.77 | 771  | 84.7  | 7.53 |     |      |      |
| A6NI61 | Transmembrane protein 8C OS=Homo sapiens<br>GN=TMEM8C PE=3 SV=1 - [TMM8C_HUMAN]         | 4.98  | 1 | 1 | 1 | 1  |      | 0.74 | 0.13 | 0.81 | 0.14 | 221  | 24.7  | 8.72 |     |      |      |
| Q6UXU6 | Transmembrane protein 92 OS=Homo sapiens<br>GN=TMEM92 PE=2 SV=1 - [TMM92_HUMAN]         | 4.40  | 1 | 1 | 1 | 1  |      | 1.09 |      |      |      | 159  | 17.2  | 5.54 |     |      |      |
| Q9NQ34 | Transmembrane protein 9B OS=Homo sapiens<br>GN=TMEM9B PE=1 SV=1 - [TMM9B_HUMAN]         | 2.53  | 1 | 1 | 1 | 1  | 0.10 | 0.21 | 0.99 | 2.13 |      | 198  | 22.5  | 8.06 |     |      |      |
| Q2M3C6 | Transmembrane protein C15orf27 OS=Homo sapiens<br>GN=C15orf27 PE=2 SV=2 - [CO027_HUMAN] | 4.90  | 1 | 1 | 1 | 2  |      | 0.74 | 1.08 | 0.62 | 0.92 | 531  | 58.4  | 4.72 |     |      |      |
| Q6UWD8 | Transmembrane protein C16orf54 OS=Homo sapiens<br>GN=C16orf54 PE=1 SV=1 - [CP054_HUMAN] | 12.50 | 1 | 1 | 1 | 2  | 1.22 | 1.10 | 1.34 | 1.21 |      | 224  | 24.3  | 6.19 |     |      |      |
| Q5T6L9 | Transmembrane protein C6orf70 OS=Homo sapiens<br>GN=C6orf70 PE=2 SV=1 - [CF070_HUMAN]   | 4.87  | 1 | 2 | 2 | 13 | 1.10 | 1.09 | 0.84 | 1.09 | 1.05 | 1.17 | 0.93  | 1.03 | 678 | 77.7 | 6.73 |
| A8MUB7 | Transmembrane protein ENSP00000382582 OS=Homo sapiens<br>PE=4 SV=2 - [YE031_HUMAN]      | 1.00  | 1 | 1 | 1 | 1  | 1.32 | 1.19 | 1.13 | 1.02 |      | 1105 | 125.8 | 8.40 |     |      |      |
| Q92973 | Transportin-1 OS=Homo sapiens<br>GN=TNPO1 PE=1 SV=2 - [TNPO1_HUMAN]                     | 3.56  | 1 | 2 | 2 | 2  | 1.93 | 2.14 | 1.88 | 2.09 |      | 898  | 102.3 | 4.98 |     |      |      |
| O14787 | Transportin-2 OS=Homo sapiens<br>GN=TNPO2 PE=1 SV=3 - [TNPO2_HUMAN]                     | 2.01  | 1 | 1 | 1 | 1  |      | 1.21 | 0.98 | 1.32 | 1.07 | 897  | 101.3 | 5.01 |     |      |      |

|        |                                                                                                          |       |   |    |    |      |      |      |      |      |      |      |      |      |      |       |       |      |      |      |
|--------|----------------------------------------------------------------------------------------------------------|-------|---|----|----|------|------|------|------|------|------|------|------|------|------|-------|-------|------|------|------|
| Q8I213 | Transposon-derived Buster3 transposase-like protein OS=Homo sapiens GN=C5orf54 PE=2 SV=1 - [CE054_HUMAN] | 3.87  | 1 | 1  | 2  | 3    | 1.09 | 1.42 | 1.13 | 1.47 |      |      |      |      |      |       |       | 594  | 68.3 | 6.42 |
| P02766 | Transthyretin OS=Homo sapiens GN=TTR PE=1 SV=1 - [TTHY_HUMAN]                                            | 76.87 | 2 | 14 | 14 | 2419 | 0.87 | 0.84 | 0.87 | 0.85 | 1.04 | 1.11 | 1.05 | 1.14 | 147  | 15.9  | 5.76  |      |      |      |
| Q13428 | Treacle protein OS=Homo sapiens GN=TCOF1 PE=1 SV=3 - [TCOF_HUMAN]                                        | 0.81  | 1 | 2  | 3  | 4    |      |      |      |      |      | 0.69 | 0.89 | 0.78 | 1.02 | 1488  | 152.0 | 9.04 |      |      |
| Q03403 | Trefoil factor 2 OS=Homo sapiens GN=TFF2 PE=1 SV=2 - [TFF2_HUMAN]                                        | 10.08 | 1 | 1  | 1  | 1    |      |      |      |      |      |      | 0.98 | 1.11 | 129  | 14.3  | 5.81  |      |      |      |
| Q07654 | Trefoil factor 3 OS=Homo sapiens GN=TFF3 PE=1 SV=1 - [TFF3_HUMAN]                                        | 31.25 | 1 | 2  | 2  | 3    |      |      |      |      |      | 2.18 | 2.39 | 2.08 | 2.28 | 80    | 8.6   | 5.92 |      |      |
| O43280 | Trehalase OS=Homo sapiens GN=TREH PE=1 SV=2 - [TREA_HUMAN]                                               | 4.29  | 1 | 2  | 2  | 4    | 1.28 | 1.28 | 1.06 | 1.07 | 1.10 | 0.77 | 1.11 | 0.78 | 583  | 66.5  | 5.68  |      |      |      |
| Q86YW5 | Trem-like transcript 1 protein OS=Homo sapiens GN=TREML1 PE=1 SV=2 - [TRML1_HUMAN]                       | 27.65 | 1 | 4  | 4  | 32   | 0.87 | 0.75 | 0.89 | 0.77 | 1.52 | 1.35 | 1.43 | 1.39 | 311  | 32.7  | 6.05  |      |      |      |
| Q7Z2Z1 | Treslin OS=Homo sapiens GN=TICRR PE=1 SV=2 - [TICRR_HUMAN]                                               | 3.66  | 1 | 4  | 4  | 5    | 1.10 | 1.23 | 0.99 | 1.13 | 5.76 | 6.31 | 5.81 | 6.38 | 1910 | 210.7 | 8.78  |      |      |      |
| Q96RU8 | Tribbles homolog 1 OS=Homo sapiens GN=TRIB1 PE=1 SV=2 - [TRIB1_HUMAN]                                    | 5.38  | 1 | 1  | 1  | 2    | 0.96 | 0.79 | 1.20 | 1.00 |      |      |      |      | 372  | 41.0  | 7.28  |      |      |      |
| Q5QJ38 | Trichohyalin-like protein 1 OS=Homo sapiens GN=TCHHL1 PE=2 SV=1 - [TCHL1_HUMAN]                          | 1.22  | 1 | 1  | 1  | 1    |      |      |      |      |      | 0.99 | 1.31 | 0.97 | 1.29 | 904   | 99.2  | 4.69 |      |      |
| P40939 | Trifunctional enzyme subunit alpha, mitochondrial OS=Homo sapiens GN=HADHA PE=1 SV=2 - [ECHA_HUMAN]      | 2.62  | 1 | 1  | 1  | 1    | 0.85 | 0.76 | 0.69 | 0.62 |      |      |      |      | 763  | 82.9  | 9.04  |      |      |      |
| P22102 | Trifunctional purine biosynthetic protein adenosine-3 OS=Homo sapiens GN=GART PE=1 SV=1 - [PUR2_HUMAN]   | 7.23  | 1 | 3  | 3  | 3    | 0.62 | 1.00 | 0.53 | 0.84 | 1.04 | 1.09 | 0.89 | 0.94 | 1010 | 107.7 | 6.70  |      |      |      |
| Q96RS0 | Trimethylguanosine synthase OS=Homo sapiens GN=TGS1 PE=1 SV=3 - [TGS1_HUMAN]                             | 3.40  | 1 | 1  | 1  | 2    |      |      |      |      |      | 1.01 | 0.45 | 0.99 | 0.44 | 853   | 96.6  | 4.94 |      |      |
| O15417 | Trinucleotide repeat-containing gene 18 protein OS=Homo sapiens GN=TNRC18 PE=1 SV=3 - [TNC18_HUMAN]      | 1.28  | 1 | 3  | 3  | 279  | 0.90 | 0.86 | 0.92 | 0.90 | 0.91 | 0.99 | 0.91 | 0.93 | 2968 | 314.3 | 8.70  |      |      |      |
| Q8NDV7 | Trinucleotide repeat-containing gene 6A protein OS=Homo sapiens GN=TNRC6A PE=1 SV=2 - [TNR6A_HUMAN]      | 4.28  | 1 | 3  | 3  | 8    | 0.80 | 0.73 | 0.99 | 0.93 |      |      |      |      | 1962 | 210.2 | 7.01  |      |      |      |
| Q9UPQ9 | Trinucleotide repeat-containing gene 6B protein OS=Homo sapiens GN=TNRC6B PE=1 SV=4 - [TNR6B_HUMAN]      | 2.13  | 1 | 2  | 2  | 5    | 1.36 | 1.40 | 1.38 | 1.42 | 1.80 | 3.19 | 2.39 | 4.24 | 1833 | 193.9 | 6.76  |      |      |      |
| Q9HCJ0 | Trinucleotide repeat-containing gene 6C protein OS=Homo sapiens GN=TNRC6C PE=1 SV=3 - [TNR6C_HUMAN]      | 6.45  | 1 | 4  | 4  | 5    | 0.84 | 0.58 | 0.84 | 0.58 | 0.65 | 0.70 | 0.73 | 0.79 | 1690 | 175.9 | 6.96  |      |      |      |
| Q9H2D6 | TRIO and F-actin-binding protein OS=Homo sapiens GN=TRIOBP PE=1 SV=3 - [TARA_HUMAN]                      | 0.97  | 1 | 2  | 2  | 3    |      |      |      |      |      | 0.76 | 0.98 | 0.80 | 1.03 | 2365  | 261.2 | 8.48 |      |      |
| P60174 | Triosephosphate isomerase OS=Homo sapiens GN=TP1 PE=1 SV=3 - [TPIS_HUMAN]                                | 37.41 | 1 | 7  | 7  | 22   | 0.92 | 0.83 | 0.96 | 0.84 | 0.85 | 0.86 | 0.86 | 0.86 | 286  | 30.8  | 5.92  |      |      |      |
| O75382 | Tripartite motif-containing protein 3 OS=Homo sapiens GN=TRIM3 PE=1 SV=2 - [TRIM3_HUMAN]                 | 2.55  | 1 | 1  | 1  | 1    | 1.28 | 1.27 | 1.14 | 1.13 |      |      |      |      | 744  | 80.8  | 7.83  |      |      |      |
| Q9C037 | Tripartite motif-containing protein 4 OS=Homo sapiens GN=TRIM4 PE=2 SV=2 - [TRIM4_HUMAN]                 | 4.20  | 1 | 1  | 1  | 1    | 1.62 | 2.37 | 1.59 | 2.33 |      |      |      |      | 500  | 57.4  | 8.10  |      |      |      |
| Q8IWZ5 | Tripartite motif-containing protein 42 OS=Homo sapiens GN=TRIM42 PE=2 SV=2 - [TRI42_HUMAN]               | 4.43  | 1 | 2  | 3  | 5    | 0.92 | 0.72 | 0.96 | 0.76 |      |      |      |      | 723  | 82.7  | 7.93  |      |      |      |
| Q96DX7 | Tripartite motif-containing protein 44 OS=Homo sapiens GN=TRIM44 PE=1 SV=1 - [TRI44_HUMAN]               | 4.94  | 1 | 1  | 1  | 2    |      |      |      |      |      | 1.04 | 1.18 | 1.22 | 1.38 | 344   | 38.4  | 4.21 |      |      |
| Q9C035 | Tripartite motif-containing protein 5 OS=Homo sapiens GN=TRIM5 PE=1 SV=1 - [TRIM5_HUMAN]                 | 4.26  | 1 | 1  | 1  | 1    | 0.62 | 0.58 | 0.61 | 0.57 |      |      |      |      | 493  | 56.3  | 6.05  |      |      |      |
| O15016 | Tripartite motif-containing protein 66 OS=Homo sapiens GN=TRIM66 PE=2 SV=4 - [TRI66_HUMAN]               | 0.99  | 1 | 1  | 1  | 1    |      |      |      |      |      | 0.80 | 0.55 | 1.17 | 0.82 | 1216  | 134.6 | 6.98 |      |      |
| Q6ZTA4 | Tripartite motif-containing protein 67 OS=Homo sapiens GN=TRIM67 PE=2 SV=3 - [TRI67_HUMAN]               | 2.55  | 1 | 1  | 1  | 1    |      |      |      |      |      | 0.67 | 0.36 | 0.75 | 0.40 | 783   | 83.8  | 7.33 |      |      |
| Q9C029 | Tripartite motif-containing protein 7 OS=Homo sapiens GN=TRIM7 PE=1 SV=2 - [TRIM7_HUMAN]                 | 1.57  | 1 | 1  | 1  | 4    | 1.25 | 0.99 | 1.33 | 1.06 | 1.53 | 1.97 | 1.21 | 1.56 | 511  | 56.6  | 7.65  |      |      |      |



|        |                                                                                                         |       |   |    |    |     |      |      |      |      |      |      |      |      |  |      |      |      |      |      |       |      |
|--------|---------------------------------------------------------------------------------------------------------|-------|---|----|----|-----|------|------|------|------|------|------|------|------|--|------|------|------|------|------|-------|------|
| A6NK02 | Tripartite motif-containing protein 75 OS=Homo sapiens GN=TRIM75 PE=2 SV=2 - [TRI75_HUMAN]              | 4.27  | 1 | 1  | 1  | 1   |      |      |      |      |      |      |      |      |  | 1.13 | 1.18 | 1.06 | 1.10 | 468  | 53.6  | 7.66 |
| A6NDQ2 | Tripartite motif-containing protein ENSP00000309378 OS=Homo sapiens PE=3 SV=2 - [TRIX3_HUMAN]           | 5.62  | 1 | 2  | 2  | 2   | 1.15 | 1.21 | 1.14 | 1.21 | 1.24 | 1.24 | 0.90 | 0.90 |  |      |      |      |      | 463  | 53.7  | 6.87 |
| O14773 | Tripeptidyl-peptidase 1 OS=Homo sapiens GN=TPP1 PE=1 SV=2 - [TPP1_HUMAN]                                | 10.30 | 1 | 4  | 4  | 6   | 0.94 | 1.10 | 0.94 | 1.11 | 0.72 | 0.85 | 0.77 | 0.91 |  |      |      |      |      | 563  | 61.2  | 6.48 |
| P29144 | Tripeptidyl-peptidase 2 OS=Homo sapiens GN=TPP2 PE=1 SV=4 - [TPP2_HUMAN]                                | 2.08  | 1 | 2  | 2  | 14  | 3.36 | 1.69 | 1.07 | 0.71 | 1.08 | 1.20 | 0.99 | 1.19 |  |      |      |      |      | 1249 | 138.3 | 6.32 |
| O75962 | Triple functional domain protein OS=Homo sapiens GN=TRIO PE=1 SV=2 - [TRIO_HUMAN]                       | 2.29  | 1 | 2  | 2  | 2   | 1.47 | 1.68 | 1.64 | 1.88 |      |      |      |      |  |      |      |      |      | 3097 | 346.7 | 6.37 |
| Q7Z2T5 | TRMT1-like protein OS=Homo sapiens GN=TRMT1L PE=1 SV=2 - [TRM1L_HUMAN]                                  | 4.64  | 1 | 2  | 2  | 4   | 1.06 | 0.83 | 1.01 | 0.80 | 0.94 | 0.99 | 0.94 | 0.98 |  |      |      |      |      | 733  | 81.7  | 7.88 |
| Q32P41 | tRNA (guanine(37)-N1)-methyltransferase OS=Homo sapiens GN=TRMT5 PE=1 SV=2 - [TRM5_HUMAN]               | 4.91  | 1 | 2  | 2  | 2   | 1.07 | 1.49 | 0.95 | 1.32 |      |      |      |      |  |      |      |      |      | 509  | 58.2  | 8.62 |
| Q9H3H1 | tRNA dimethylallyltransferase, mitochondrial OS=Homo sapiens GN=TRIT1 PE=1 SV=1 - [MOD5_HUMAN]          | 3.00  | 1 | 1  | 1  | 1   |      |      |      |      | 0.02 | 0.05 | 0.50 | 1.17 |  |      |      |      |      | 467  | 52.7  | 8.21 |
| O95620 | tRNA-dihydrouridine(20a/20b) synthase [NAD(P)+]-like OS=Homo sapiens GN=DUS4L PE=2 SV=2 - [DUS4L_HUMAN] | 2.52  | 1 | 1  | 1  | 7   | 1.16 | 1.25 | 1.23 | 1.33 | 0.98 | 1.23 | 1.16 | 1.46 |  |      |      |      |      | 317  | 35.8  | 7.33 |
| Q9BUB4 | tRNA-specific adenosine deaminase 1 OS=Homo sapiens GN=ADAT1 PE=2 SV=1 - [ADAT1_HUMAN]                  | 2.39  | 1 | 1  | 1  | 1   | 0.19 | 0.20 | 0.28 | 0.30 |      |      |      |      |  |      |      |      |      | 502  | 55.4  | 9.01 |
| Q96EY9 | tRNA-specific adenosine deaminase-like protein 3 OS=Homo sapiens GN=ADAT3 PE=1 SV=1 - [ADAT3_HUMAN]     | 3.99  | 1 | 1  | 1  | 1   |      |      |      |      | 0.85 | 0.79 | 4.74 | 4.38 |  |      |      |      |      | 351  | 38.0  | 7.88 |
| Q9Y3I0 | tRNA-splicing ligase RtcB homolog OS=Homo sapiens GN=C22orf28 PE=1 SV=1 - [RTCB_HUMAN]                  | 2.38  | 1 | 1  | 1  | 1   |      |      |      |      | 0.75 | 0.84 | 0.80 | 0.89 |  |      |      |      |      | 505  | 55.2  | 7.23 |
| Q9NYL9 | Tropomodulin-3 OS=Homo sapiens GN=TMOD3 PE=1 SV=1 - [TMOD3_HUMAN]                                       | 13.92 | 2 | 4  | 4  | 5   |      |      |      |      | 1.04 | 1.02 | 1.05 | 1.02 |  |      |      |      |      | 352  | 39.6  | 5.19 |
| P09493 | Tropomyosin alpha-1 chain OS=Homo sapiens GN=TPM1 PE=1 SV=2 - [TPM1_HUMAN]                              | 26.41 | 2 | 3  | 9  | 101 | 0.27 | 0.61 | 0.43 | 0.97 | 1.51 | 1.33 | 1.40 | 1.23 |  |      |      |      |      | 284  | 32.7  | 4.74 |
| P06753 | Tropomyosin alpha-3 chain OS=Homo sapiens GN=TPM3 PE=1 SV=1 - [TPM3_HUMAN]                              | 23.59 | 2 | 4  | 10 | 106 | 1.19 | 1.00 | 1.74 | 1.48 | 2.05 | 2.12 | 1.89 | 1.96 |  |      |      |      |      | 284  | 32.8  | 4.72 |
| P67936 | Tropomyosin alpha-4 chain OS=Homo sapiens GN=TPM4 PE=1 SV=3 - [TPM4_HUMAN]                              | 41.53 | 2 | 10 | 15 | 170 | 0.58 | 0.53 | 0.57 | 0.52 | 1.11 | 1.09 | 1.14 | 1.05 |  |      |      |      |      | 248  | 28.5  | 4.69 |
| P07477 | Trypsin-1 OS=Homo sapiens GN=PRSS1 PE=1 SV=1 - [TRY1_HUMAN]                                             | 15.38 | 2 | 2  | 3  | 121 | 0.84 | 1.08 | 0.84 | 1.08 | 1.40 | 1.12 | 1.14 | 1.01 |  |      |      |      |      | 247  | 26.5  | 6.51 |
| P07478 | Trypsin-2 OS=Homo sapiens GN=PRSS2 PE=1 SV=1 - [TRY2_HUMAN]                                             | 15.38 | 1 | 1  | 3  | 49  | 0.74 | 0.92 | 0.71 | 0.87 | 0.78 | 0.93 | 0.88 | 1.04 |  |      |      |      |      | 247  | 26.5  | 4.92 |
| P35030 | Trypsin-3 OS=Homo sapiens GN=PRSS3 PE=1 SV=2 - [TRY3_HUMAN]                                             | 6.91  | 1 | 1  | 2  | 9   | 0.71 | 0.92 | 0.68 | 0.97 | 0.80 | 0.70 | 0.92 | 0.81 |  |      |      |      |      | 304  | 32.5  | 7.49 |
| P17752 | Tryptophan 5-hydroxylase 1 OS=Homo sapiens GN=TPH1 PE=1 SV=4 - [TPH1_HUMAN]                             | 1.35  | 1 | 1  | 1  | 1   |      |      |      |      | 2.66 | 3.32 | 2.50 | 3.13 |  |      |      |      |      | 444  | 51.0  | 7.21 |
| Q8IWU9 | Tryptophan 5-hydroxylase 2 OS=Homo sapiens GN=TPH2 PE=1 SV=1 - [TPH2_HUMAN]                             | 3.88  | 1 | 1  | 1  | 1   | 1.84 | 2.85 | 1.68 | 2.61 |      |      |      |      |  |      |      |      |      | 490  | 56.0  | 6.42 |
| P23381 | Tryptophan-tRNA ligase, cytoplasmic OS=Homo sapiens GN=WARS PE=1 SV=2 - [SYWC_HUMAN]                    | 3.40  | 1 | 1  | 1  | 2   | 0.78 | 1.18 | 0.62 | 0.94 |      |      |      |      |  |      |      |      |      | 471  | 53.1  | 6.23 |
| Q9UGM6 | Tryptophan-tRNA ligase, mitochondrial OS=Homo sapiens GN=WARS2 PE=1 SV=1 - [SYWM_HUMAN]                 | 1.39  | 1 | 1  | 1  | 1   |      |      |      |      | 0.31 | 0.30 |      |      |  |      |      |      |      | 360  | 40.1  | 9.28 |
| Q8WUA8 | Tsukushin OS=Homo sapiens GN=TSKU PE=2 SV=3 - [TSK_HUMAN]                                               | 19.26 | 1 | 5  | 5  | 12  | 1.54 | 1.37 | 1.43 | 1.17 | 1.12 | 1.14 | 1.20 | 1.21 |  |      |      |      |      | 353  | 37.8  | 6.87 |
| P49815 | Tuberin OS=Homo sapiens GN=TSC2 PE=1 SV=2 - [TSC2_HUMAN]                                                | 1.72  | 7 | 1  | 2  | 12  | 0.81 | 0.32 |      |      | 0.97 | 0.59 | 0.70 | 0.88 |  |      |      |      |      | 1807 | 200.5 | 7.31 |
| A6NHL2 | Tubulin alpha chain-like 3 OS=Homo sapiens GN=TUBAL3 PE=1 SV=2 - [TBAL3_HUMAN]                          | 3.14  | 1 | 1  | 1  | 2   |      |      |      |      | 1.00 | 0.92 | 1.03 | 0.94 |  |      |      |      |      | 446  | 49.9  | 6.05 |
| Q9BQE3 | Tubulin alpha-1C chain OS=Homo sapiens GN=TUBA1C PE=1 SV=1 - [TBA1C_HUMAN]                              | 19.38 | 5 | 3  | 6  | 29  | 0.72 | 0.73 | 0.67 | 0.70 | 1.26 | 1.28 | 1.17 | 1.17 |  |      |      |      |      | 449  | 49.9  | 5.10 |

|        |                                                                                                              |       |   |   |   |    |      |      |      |      |      |      |      |      |      |       |      |
|--------|--------------------------------------------------------------------------------------------------------------|-------|---|---|---|----|------|------|------|------|------|------|------|------|------|-------|------|
| P68366 | Tubulin alpha-4A chain OS=Homo sapiens GN=TUBA4A PE=1 SV=1 - [TBA4A_HUMAN]                                   | 21.65 | 2 | 5 | 7 | 29 | 0.59 | 0.48 | 0.40 | 0.42 | 0.86 | 0.95 | 0.85 | 0.94 | 448  | 49.9  | 5.06 |
| Q9NY65 | Tubulin alpha-8 chain OS=Homo sapiens GN=TUBA8 PE=1 SV=1 - [TBA8_HUMAN]                                      | 13.59 | 2 | 1 | 4 | 12 |      |      |      |      | 1.44 | 1.15 | 1.18 | 0.94 | 449  | 50.1  | 5.06 |
| Q9H4B7 | Tubulin beta-1 chain OS=Homo sapiens GN=TUBB1 PE=1 SV=1 - [TBB1_HUMAN]                                       | 21.51 | 1 | 6 | 7 | 26 | 0.38 | 0.38 | 0.41 | 0.41 | 0.87 | 0.99 | 1.05 | 1.01 | 451  | 50.3  | 5.17 |
| Q13885 | Tubulin beta-2A chain OS=Homo sapiens GN=TUBB2A PE=1 SV=1 - [TBB2A_HUMAN]                                    | 26.97 | 4 | 2 | 8 | 23 | 0.50 | 0.55 | 0.47 | 0.52 | 1.15 | 1.04 | 1.43 | 1.29 | 445  | 49.9  | 4.89 |
| Q13509 | Tubulin beta-3 chain OS=Homo sapiens GN=TUBB3 PE=1 SV=2 - [TBB3_HUMAN]                                       | 17.33 | 1 | 1 | 6 | 17 | 0.75 | 0.73 | 0.77 | 0.76 | 0.31 | 0.49 | 0.83 | 1.28 | 450  | 50.4  | 4.93 |
| Q3ZCM7 | Tubulin beta-8 chain OS=Homo sapiens GN=TUBB8 PE=1 SV=2 - [TBB8_HUMAN]                                       | 13.51 | 4 | 2 | 5 | 10 | 0.62 | 0.65 | 0.54 | 0.58 |      |      |      |      | 444  | 49.7  | 4.89 |
| P23258 | Tubulin gamma-1 chain OS=Homo sapiens GN=TUBG1 PE=1 SV=2 - [TBG1_HUMAN]                                      | 3.99  | 1 | 1 | 1 | 1  | 0.85 | 0.87 | 0.81 | 0.83 |      |      |      |      | 451  | 51.1  | 6.14 |
| A6NNM8 | Tubulin polyglutamylase TTL13 OS=Homo sapiens GN=TLL13 PE=1 SV=2 - [TLL13_HUMAN]                             | 3.44  | 1 | 1 | 1 | 1  | 1.20 | 1.02 | 1.20 | 1.02 |      |      |      |      | 815  | 93.6  | 8.91 |
| Q14679 | Tubulin polyglutamylase TTL4 OS=Homo sapiens GN=TLL4 PE=1 SV=2 - [TLL4_HUMAN]                                | 3.00  | 1 | 2 | 2 | 2  | 0.10 | 0.05 | 0.24 | 0.11 | 0.15 | 0.96 | 0.18 | 1.12 | 1199 | 133.3 | 8.85 |
| Q6EMB2 | Tubulin polyglutamylase TTL5 OS=Homo sapiens GN=TLL5 PE=1 SV=3 - [TLL5_HUMAN]                                | 3.67  | 1 | 3 | 3 | 4  | 0.93 | 1.18 | 0.92 | 1.16 | 0.81 | 0.89 | 0.82 | 0.90 | 1281 | 143.5 | 8.63 |
| Q9BTW9 | Tubulin-specific chaperone D OS=Homo sapiens GN=TBCD PE=1 SV=2 - [TBCD_HUMAN]                                | 3.78  | 1 | 2 | 2 | 4  |      |      |      |      | 0.69 | 0.74 | 0.62 | 0.67 | 1192 | 132.5 | 6.19 |
| Q9GZM7 | Tubulointerstitial nephritis antigen-like OS=Homo sapiens GN=TINAGL1 PE=1 SV=1 - [TINAL_HUMAN]               | 5.78  | 1 | 1 | 1 | 1  |      |      |      |      | 0.59 | 0.89 | 1.87 | 2.82 | 467  | 52.4  | 6.99 |
| Q9H7E2 | Tudor domain-containing protein 3 OS=Homo sapiens GN=TDRD3 PE=1 SV=1 - [TDRD3_HUMAN]                         | 5.22  | 1 | 2 | 2 | 2  | 0.75 | 0.73 | 0.86 | 0.85 | 1.09 | 1.10 | 0.90 | 0.91 | 651  | 73.1  | 9.23 |
| O60522 | Tudor domain-containing protein 6 OS=Homo sapiens GN=TDRD6 PE=2 SV=2 - [TDRD6_HUMAN]                         | 1.38  | 1 | 1 | 1 | 1  |      |      |      |      |      |      |      | 0.86 | 2096 | 236.4 | 5.25 |
| Q8NHU6 | Tudor domain-containing protein 7 OS=Homo sapiens GN=TDRD7 PE=1 SV=2 - [TDRD7_HUMAN]                         | 1.00  | 1 | 1 | 1 | 1  |      |      |      |      | 0.77 | 0.97 | 0.83 | 1.05 | 1098 | 123.5 | 7.21 |
| Q9NNX1 | Tuftelin OS=Homo sapiens GN=TUFT1 PE=2 SV=1 - [TUFT1_HUMAN]                                                  | 5.13  | 1 | 1 | 2 | 2  | 1.00 | 1.01 | 1.00 | 1.02 |      |      |      |      | 390  | 44.2  | 6.00 |
| Q9UBB9 | Tuftelin-interacting protein 11 OS=Homo sapiens GN=TFIP11 PE=1 SV=1 - [TFP11_HUMAN]                          | 3.35  | 1 | 2 | 2 | 3  | 0.77 | 0.74 | 0.71 | 0.68 |      |      |      |      | 837  | 96.8  | 5.67 |
| Q03169 | Tumor necrosis factor alpha-induced protein 2 OS=Homo sapiens GN=TNFAIP2 PE=1 SV=2 - [TNAP2_HUMAN]           | 5.50  | 1 | 2 | 2 | 3  | 0.91 | 0.96 | 0.93 | 0.98 | 0.69 |      |      |      | 654  | 72.6  | 6.46 |
| O14788 | Tumor necrosis factor ligand superfamily member 11 OS=Homo sapiens GN=TNFSF11 PE=1 SV=1 - [TNF11_HUMAN]      | 10.41 | 1 | 1 | 1 | 1  | 1.00 | 1.09 | 0.90 | 0.98 |      |      |      |      | 317  | 35.5  | 7.65 |
| O43508 | Tumor necrosis factor ligand superfamily member 12 OS=Homo sapiens GN=TNFSF12 PE=1 SV=1 - [TNF12_HUMAN]      | 3.21  | 1 | 1 | 1 | 1  | 1.31 | 1.41 | 1.35 | 1.47 |      |      |      |      | 249  | 27.2  | 9.41 |
| O75888 | Tumor necrosis factor ligand superfamily member 13 OS=Homo sapiens GN=TNFSF13 PE=1 SV=1 - [TNF13_HUMAN]      | 8.40  | 1 | 1 | 2 | 4  |      |      |      |      | 1.15 | 1.24 | 0.95 | 1.02 | 250  | 27.4  | 9.63 |
| Q9Y275 | Tumor necrosis factor ligand superfamily member 13B OS=Homo sapiens GN=TNFSF13B PE=1 SV=1 - [TN13B_HUMAN]    | 14.04 | 1 | 2 | 2 | 4  |      |      |      |      | 1.49 | 1.52 | 1.43 | 1.46 | 285  | 31.2  | 6.25 |
| O43557 | Tumor necrosis factor ligand superfamily member 14 OS=Homo sapiens GN=TNFSF14 PE=1 SV=2 - [TNF14_HUMAN]      | 5.42  | 1 | 1 | 1 | 1  | 1.02 | 0.90 | 0.74 | 0.65 |      |      |      |      | 240  | 26.3  | 8.92 |
| O00220 | Tumor necrosis factor receptor superfamily member 10A OS=Homo sapiens GN=TNFRSF10A PE=1 SV=3 - [TR10A_HUMAN] | 3.42  | 1 | 1 | 1 | 1  |      |      |      |      | 1.97 | 2.21 | 1.83 | 2.06 | 468  | 50.1  | 7.03 |
| O14798 | Tumor necrosis factor receptor superfamily member 10C OS=Homo sapiens GN=TNFRSF10C PE=1 SV=3 - [TR10C_HUMAN] | 3.47  | 1 | 1 | 1 | 2  | 1.13 | 1.10 | 1.08 | 1.07 |      |      |      |      | 259  | 27.4  | 4.82 |
| Q9NP84 | Tumor necrosis factor receptor superfamily member 12A OS=Homo sapiens GN=TNFRSF12A PE=1 SV=1 - [TNR12_HUMAN] | 7.75  | 1 | 1 | 1 | 3  |      |      |      |      | 3.43 | 3.02 | 3.06 | 2.69 | 129  | 13.9  | 8.95 |
| Q02223 | Tumor necrosis factor receptor superfamily member 17 OS=Homo sapiens GN=TNFRSF17 PE=1 SV=2 - [TNR17_HUMAN]   | 6.52  | 1 | 1 | 1 | 2  |      |      |      |      | 0.79 | 0.74 | 0.93 | 0.88 | 184  | 20.2  | 5.35 |

|        |                                                                                                                          |       |   |   |   |    |      |      |      |      |      |      |       |      |     |      |      |
|--------|--------------------------------------------------------------------------------------------------------------------------|-------|---|---|---|----|------|------|------|------|------|------|-------|------|-----|------|------|
| Q969Z4 | Tumor necrosis factor receptor superfamily member 19L OS=Homo sapiens GN=RELT PE=1 SV=1 - [TR19L_HUMAN]                  | 1.86  | 1 | 1 | 1 | 1  | 1.49 | 1.59 | 1.35 | 1.45 |      | 430  | 46.1  | 8.35 |     |      |      |
| Q15628 | Tumor necrosis factor receptor type 1-associated DEATH domain protein OS=Homo sapiens GN=TRADD PE=1 SV=2 - [TRADD_HUMAN] | 13.14 | 1 | 2 | 2 | 2  |      | 1.11 | 1.08 | 0.94 | 0.91 | 312  | 34.2  | 6.27 |     |      |      |
| P98066 | Tumor necrosis factor-inducible gene 6 protein OS=Homo sapiens GN=TNFAIP6 PE=1 SV=2 - [TSG6_HUMAN]                       | 3.61  | 1 | 1 | 1 | 1  | 1.27 | 1.01 | 1.22 | 0.98 |      | 277  | 31.2  | 6.79 |     |      |      |
| P55327 | Tumor protein D52 OS=Homo sapiens GN=TPD52 PE=1 SV=2 - [TPD52_HUMAN]                                                     | 6.70  | 1 | 1 | 1 | 1  |      | 2.16 | 1.55 | 2.07 | 1.49 | 224  | 24.3  | 4.83 |     |      |      |
| O43399 | Tumor protein D54 OS=Homo sapiens GN=TPD52L2 PE=1 SV=2 - [TPD54_HUMAN]                                                   | 4.37  | 1 | 1 | 1 | 3  |      | 2.45 | 2.17 | 2.38 | 2.11 | 206  | 22.2  | 5.36 |     |      |      |
| Q96J77 | Tumor protein D55 OS=Homo sapiens GN=TPD52L3 PE=1 SV=2 - [TPD55_HUMAN]                                                   | 10.71 | 1 | 1 | 1 | 1  | 1.21 | 1.06 | 1.38 | 1.21 |      | 140  | 15.5  | 9.95 |     |      |      |
| Q6ZUI0 | Tumor protein p63-regulated gene 1 protein OS=Homo sapiens GN=TPRG1 PE=2 SV=1 - [TPRG1_HUMAN]                            | 5.82  | 1 | 1 | 1 | 1  |      | 1.28 | 1.86 | 1.26 | 1.84 | 275  | 31.2  | 7.09 |     |      |      |
| O15350 | Tumor protein p73 OS=Homo sapiens GN=TP73 PE=1 SV=1 - [P73_HUMAN]                                                        | 2.99  | 2 | 1 | 2 | 2  | 1.16 | 1.24 | 1.06 | 1.14 |      | 636  | 69.6  | 6.95 |     |      |      |
| Q6IBS0 | Twinfilin-2 OS=Homo sapiens GN=TWF2 PE=1 SV=2 - [TWF2_HUMAN]                                                             | 19.48 | 2 | 5 | 5 | 15 |      | 1.22 | 1.23 | 1.21 | 1.27 | 349  | 39.5  | 6.84 |     |      |      |
| Q96RR1 | Twinkle protein, mitochondrial OS=Homo sapiens GN=PEO1 PE=1 SV=1 - [PEO1_HUMAN]                                          | 6.14  | 1 | 2 | 2 | 4  |      | 0.51 | 0.46 | 0.82 | 0.74 | 684  | 77.1  | 8.98 |     |      |      |
| Q9ULQ1 | Two pore calcium channel protein 1 OS=Homo sapiens GN=TPCN1 PE=1 SV=3 - [TPCN1_HUMAN]                                    | 0.86  | 1 | 2 | 2 | 4  | 1.14 | 1.25 | 1.08 | 1.18 | 1.02 | 0.92 | 0.90  | 0.92 | 816 | 94.1 | 8.27 |
| Q9Y274 | Type 2 lactosamine alpha-2,3-sialyltransferase OS=Homo sapiens GN=ST3GAL6 PE=1 SV=1 - [SIA10_HUMAN]                      | 2.42  | 1 | 1 | 1 | 1  | 1.40 | 1.20 | 1.41 | 1.23 |      | 331  | 38.2  | 9.00 |     |      |      |
| P32019 | Type II inositol 1,4,5-trisphosphate 5-phosphatase OS=Homo sapiens GN=INPP5B PE=1 SV=4 - [I5P2_HUMAN]                    | 1.61  | 1 | 1 | 1 | 3  |      | 1.26 | 1.20 | 1.34 | 1.27 | 993  | 112.8 | 5.57 |     |      |      |
| P55073 | Type III iodothyronine deiodinase OS=Homo sapiens GN=DIO3 PE=1 SV=3 - [IOD3_HUMAN]                                       | 10.79 | 1 | 1 | 1 | 1  | 1.16 | 0.76 | 1.21 | 0.80 |      | 278  | 31.4  | 6.71 |     |      |      |
| P17735 | Tyrosine aminotransferase OS=Homo sapiens GN=TAT PE=1 SV=1 - [ATTY_HUMAN]                                                | 3.52  | 1 | 1 | 1 | 1  |      | 1.20 | 1.29 | 1.41 | 1.51 | 454  | 50.4  | 6.30 |     |      |      |
| P54577 | Tyrosine-tRNA ligase, cytoplasmic OS=Homo sapiens GN=YARS PE=1 SV=4 - [SYYC_HUMAN]                                       | 5.68  | 1 | 2 | 2 | 70 | 1.05 | 0.98 | 0.97 | 0.95 | 1.55 | 1.90 | 1.49  | 1.93 | 528 | 59.1 | 7.05 |
| Q9UIG0 | Tyrosine-protein kinase BAZ1B OS=Homo sapiens GN=BAZ1B PE=1 SV=2 - [BAZ1B_HUMAN]                                         | 1.48  | 1 | 1 | 1 | 6  | 1.61 | 1.22 | 1.49 | 1.14 |      | 1483 | 170.8 | 8.48 |     |      |      |
| P16591 | Tyrosine-protein kinase Fer OS=Homo sapiens GN=FER PE=1 SV=2 - [FER_HUMAN]                                               | 3.04  | 2 | 2 | 3 | 8  | 2.32 | 1.24 | 2.27 | 1.23 |      | 822  | 94.6  | 7.14 |     |      |      |
| P42685 | Tyrosine-protein kinase FRK OS=Homo sapiens GN=FRK PE=1 SV=1 - [FRK_HUMAN]                                               | 9.11  | 1 | 2 | 2 | 8  | 1.52 | 1.46 | 1.63 | 1.58 | 1.55 | 1.38 | 1.56  | 1.39 | 505 | 58.2 | 6.67 |
| O60674 | Tyrosine-protein kinase JAK2 OS=Homo sapiens GN=JAK2 PE=1 SV=2 - [JAK2_HUMAN]                                            | 1.68  | 1 | 1 | 1 | 3  |      | 1.76 | 1.73 | 1.75 | 1.72 | 1132 | 130.6 | 7.21 |     |      |      |
| Q06418 | Tyrosine-protein kinase receptor TYRO3 OS=Homo sapiens GN=TYRO3 PE=1 SV=1 - [TYRO3_HUMAN]                                | 2.81  | 1 | 2 | 2 | 3  | 0.66 | 0.59 | 0.70 | 0.64 | 0.53 | 0.64 | 0.52  | 0.63 | 890 | 96.8 | 5.67 |
| P30530 | Tyrosine-protein kinase receptor UFO OS=Homo sapiens GN=AXL PE=1 SV=3 - [UFO_HUMAN]                                      | 1.34  | 1 | 1 | 1 | 2  | 0.88 | 0.91 | 0.89 | 0.93 |      | 894  | 98.3  | 5.43 |     |      |      |
| Q9H3Y6 | Tyrosine-protein kinase Srms OS=Homo sapiens GN=SRMS PE=2 SV=1 - [SRMS_HUMAN]                                            | 2.66  | 1 | 1 | 1 | 1  | 1.28 | 1.50 | 1.52 | 1.79 |      | 488  | 54.5  | 8.21 |     |      |      |
| P43405 | Tyrosine-protein kinase SYK OS=Homo sapiens GN=SYK PE=1 SV=1 - [KSYK_HUMAN]                                              | 2.99  | 1 | 2 | 2 | 9  | 0.77 | 0.73 | 0.80 | 0.76 | 1.59 | 1.77 | 1.36  | 1.49 | 635 | 72.0 | 8.25 |
| P42681 | Tyrosine-protein kinase TXK OS=Homo sapiens GN=TXK PE=1 SV=3 - [TXK_HUMAN]                                               | 3.23  | 1 | 1 | 1 | 5  | 0.78 | 0.91 | 0.91 | 1.06 | 0.95 | 0.88 | 1.03  | 0.95 | 527 | 61.2 | 7.97 |
| P18031 | Tyrosine-protein phosphatase non-receptor type 1 OS=Homo sapiens GN=PTPN1 PE=1 SV=1 - [PTN1_HUMAN]                       | 1.61  | 1 | 1 | 1 | 1  |      | 0.66 | 0.74 | 0.47 | 0.53 | 435  | 49.9  | 6.27 |     |      |      |
| Q05209 | Tyrosine-protein phosphatase non-receptor type 12 OS=Homo sapiens GN=PTPN12 PE=1 SV=3 - [PTN12_HUMAN]                    | 8.85  | 1 | 4 | 4 | 6  | 1.49 | 1.61 | 1.45 | 1.58 | 1.14 | 1.23 | 1.16  | 1.27 | 780 | 88.1 | 5.62 |

|        |                                                                                                             |       |   |   |   |   |      |      |      |      |      |      |      |      |      |       |      |
|--------|-------------------------------------------------------------------------------------------------------------|-------|---|---|---|---|------|------|------|------|------|------|------|------|------|-------|------|
| Q12923 | Tyrosine-protein phosphatase non-receptor type 13 OS=Homo sapiens GN=PTPN13 PE=1 SV=2 - [PTN13_HUMAN]       | 3.46  | 1 | 4 | 4 | 7 |      |      |      |      | 1.30 | 1.01 | 1.31 | 1.03 | 2485 | 276.7 | 6.42 |
| Q15678 | Tyrosine-protein phosphatase non-receptor type 14 OS=Homo sapiens GN=PTPN14 PE=1 SV=2 - [PTN14_HUMAN]       | 1.68  | 1 | 1 | 1 | 1 | 1.28 | 1.27 | 1.29 | 1.29 |      |      |      |      | 1187 | 135.2 | 8.31 |
| Q4JDL3 | Tyrosine-protein phosphatase non-receptor type 20 OS=Homo sapiens GN=PTPN20A PE=1 SV=1 - [PTN20_HUMAN]      | 6.43  | 1 | 1 | 1 | 1 | 0.23 | 0.16 | 0.19 | 0.13 |      |      |      |      | 420  | 48.4  | 5.77 |
| Q9Y2R2 | Tyrosine-protein phosphatase non-receptor type 22 OS=Homo sapiens GN=PTPN22 PE=1 SV=2 - [PTN22_HUMAN]       | 2.73  | 1 | 2 | 2 | 2 | 1.26 | 1.28 | 1.19 | 1.21 |      |      |      |      | 807  | 91.6  | 7.59 |
| P26045 | Tyrosine-protein phosphatase non-receptor type 3 OS=Homo sapiens GN=PTPN3 PE=1 SV=2 - [PTN3_HUMAN]          | 3.83  | 1 | 2 | 2 | 3 | 0.78 | 1.48 | 1.00 | 1.89 | 1.40 | 1.49 | 1.40 | 1.48 | 913  | 103.9 | 7.03 |
| P29350 | Tyrosine-protein phosphatase non-receptor type 6 OS=Homo sapiens GN=PTPN6 PE=1 SV=1 - [PTN6_HUMAN]          | 6.72  | 1 | 3 | 3 | 6 | 0.03 | 0.02 | 0.06 | 0.04 | 1.02 | 1.10 | 1.11 | 1.19 | 595  | 67.5  | 7.78 |
| Q6IEG0 | U11/U12 small nuclear ribonucleoprotein 48 kDa protein OS=Homo sapiens GN=SNRNP48 PE=1 SV=2 - [SNR48_HUMAN] | 5.60  | 1 | 1 | 1 | 1 | 1.22 | 1.27 | 1.13 | 1.19 |      |      |      |      | 339  | 39.9  | 6.95 |
| O15042 | U2 snRNP-associated SURP motif-containing protein OS=Homo sapiens GN=U2SURP PE=1 SV=2 - [SR140_HUMAN]       | 1.17  | 1 | 1 | 1 | 1 |      |      |      |      | 1.65 | 0.71 | 1.88 | 0.81 | 1029 | 118.2 | 8.47 |
| O43290 | U4/U6.U5 tri-snRNP-associated protein 1 OS=Homo sapiens GN=SART1 PE=1 SV=1 - [SNUT1_HUMAN]                  | 3.00  | 1 | 1 | 1 | 1 |      |      |      |      | 1.41 | 1.13 | 1.21 | 0.96 | 800  | 90.2  | 6.13 |
| Q53GS9 | U4/U6.U5 tri-snRNP-associated protein 2 OS=Homo sapiens GN=USP39 PE=1 SV=2 - [SNUT2_HUMAN]                  | 5.66  | 1 | 2 | 2 | 2 | 0.78 | 0.82 | 0.85 | 0.90 | 0.77 | 0.73 | 0.93 | 0.88 | 565  | 65.3  | 8.91 |
| O75643 | U5 small nuclear ribonucleoprotein 200 kDa helicase OS=Homo sapiens GN=SNRNP200 PE=1 SV=2 - [U520_HUMAN]    | 0.47  | 1 | 1 | 1 | 1 | 0.71 | 0.78 | 0.84 | 0.94 |      |      |      |      | 2136 | 244.4 | 6.06 |
| Q96DE0 | U8 snoRNA-decapping enzyme OS=Homo sapiens GN=NUDT16 PE=1 SV=2 - [NUD16_HUMAN]                              | 12.82 | 1 | 1 | 1 | 1 |      |      |      |      | 0.64 | 0.35 | 0.90 | 0.49 | 195  | 21.3  | 6.89 |
| Q9UMX0 | Ubiquitin-1 OS=Homo sapiens GN=UBQLN1 PE=1 SV=2 - [UBQL1_HUMAN]                                             | 14.43 | 3 | 4 | 4 | 5 | 0.95 | 1.01 | 1.02 | 1.10 | 0.90 | 1.04 | 0.91 | 1.05 | 589  | 62.5  | 5.11 |
| Q9Y2Z9 | Ubiquinone biosynthesis monooxygenase COQ6 OS=Homo sapiens GN=COQ6 PE=1 SV=2 - [COQ6_HUMAN]                 | 5.34  | 1 | 1 | 1 | 1 |      |      |      |      | 0.40 | 0.36 | 0.68 | 0.60 | 468  | 50.8  | 7.30 |
| P51784 | Ubiquitin carboxyl-terminal hydrolase 11 OS=Homo sapiens GN=USP11 PE=1 SV=3 - [UBP11_HUMAN]                 | 4.67  | 1 | 2 | 2 | 2 | 1.01 | 0.86 | 1.12 | 0.97 | 3.91 | 6.01 | 5.71 | 8.78 | 963  | 109.7 | 5.45 |
| O94966 | Ubiquitin carboxyl-terminal hydrolase 19 OS=Homo sapiens GN=USP19 PE=1 SV=2 - [UBP19_HUMAN]                 | 1.97  | 1 | 1 | 1 | 1 | 0.85 | 0.99 | 0.80 | 0.94 |      |      |      |      | 1318 | 145.6 | 6.28 |
| Q9Y2K6 | Ubiquitin carboxyl-terminal hydrolase 20 OS=Homo sapiens GN=USP20 PE=1 SV=2 - [UBP20_HUMAN]                 | 4.05  | 1 | 2 | 3 | 5 | 0.87 | 0.67 | 0.74 | 0.66 |      |      |      |      | 914  | 101.9 | 6.11 |
| Q9UPU5 | Ubiquitin carboxyl-terminal hydrolase 24 OS=Homo sapiens GN=USP24 PE=1 SV=3 - [UBP24_HUMAN]                 | 0.69  | 1 | 1 | 1 | 1 |      |      |      |      | 0.84 | 0.88 | 0.71 | 0.74 | 2620 | 294.2 | 6.14 |
| Q9BXU7 | Ubiquitin carboxyl-terminal hydrolase 26 OS=Homo sapiens GN=USP26 PE=1 SV=1 - [UBP26_HUMAN]                 | 3.29  | 1 | 2 | 2 | 3 | 0.71 | 0.31 | 1.06 | 0.47 | 0.95 | 1.09 | 0.87 | 0.99 | 913  | 104.0 | 8.70 |
| A6NNY8 | Ubiquitin carboxyl-terminal hydrolase 27 OS=Homo sapiens GN=USP27X PE=2 SV=3 - [UBP27_HUMAN]                | 2.28  | 1 | 1 | 1 | 2 | 1.09 | 1.09 | 1.04 | 1.04 |      |      |      |      | 438  | 49.6  | 7.18 |
| Q96RU2 | Ubiquitin carboxyl-terminal hydrolase 28 OS=Homo sapiens GN=USP28 PE=1 SV=1 - [UBP28_HUMAN]                 | 6.87  | 1 | 3 | 3 | 3 | 1.19 | 1.21 | 1.14 | 1.18 |      |      |      |      | 1077 | 122.4 | 5.20 |
| Q9HBJ7 | Ubiquitin carboxyl-terminal hydrolase 29 OS=Homo sapiens GN=USP29 PE=2 SV=1 - [UBP29_HUMAN]                 | 3.58  | 1 | 2 | 2 | 3 | 2.13 | 2.10 | 2.30 | 2.27 |      |      |      |      | 922  | 104.1 | 5.91 |
| Q70CQ4 | Ubiquitin carboxyl-terminal hydrolase 31 OS=Homo sapiens GN=USP31 PE=1 SV=2 - [UBP31_HUMAN]                 | 2.07  | 1 | 1 | 1 | 1 | 1.22 | 0.77 | 1.23 | 0.78 |      |      |      |      | 1352 | 146.6 | 9.22 |
| Q70CQ2 | Ubiquitin carboxyl-terminal hydrolase 34 OS=Homo sapiens GN=USP34 PE=1 SV=2 - [UBP34_HUMAN]                 | 0.62  | 1 | 1 | 1 | 1 | 1.79 |      | 1.56 |      |      |      |      |      | 3546 | 404.0 | 5.82 |
| Q9P275 | Ubiquitin carboxyl-terminal hydrolase 36 OS=Homo sapiens GN=USP36 PE=1 SV=3 - [UBP36_HUMAN]                 | 5.00  | 1 | 2 | 2 | 9 | 1.18 | 1.17 | 1.23 | 1.23 |      |      |      |      | 1121 | 122.6 | 9.67 |
| Q70EL4 | Ubiquitin carboxyl-terminal hydrolase 43 OS=Homo sapiens GN=USP43 PE=1 SV=2 - [UBP43_HUMAN]                 | 4.36  | 1 | 2 | 2 | 2 |      |      |      |      | 1.35 | 1.31 | 1.29 | 1.26 | 1123 | 122.7 | 9.19 |
| Q9H0E7 | Ubiquitin carboxyl-terminal hydrolase 44 OS=Homo sapiens GN=USP44 PE=1 SV=2 - [UBP44_HUMAN]                 | 1.97  | 1 | 1 | 1 | 1 | 1.20 | 0.74 | 1.18 | 0.73 |      |      |      |      | 712  | 81.1  | 7.90 |

|        |                                                                                                                   |       |   |   |   |    |      |      |      |      |      |      |      |      |      |      |       |      |       |      |
|--------|-------------------------------------------------------------------------------------------------------------------|-------|---|---|---|----|------|------|------|------|------|------|------|------|------|------|-------|------|-------|------|
| Q96K76 | Ubiquitin carboxyl-terminal hydrolase 47 OS=Homo sapiens GN=USP47 PE=1 SV=3 - [UBP47_HUMAN]                       | 2.04  | 1 | 1 | 1 | 1  |      |      |      |      |      |      |      | 1.22 | 2.15 | 1375 | 157.2 | 5.08 |       |      |
| Q93009 | Ubiquitin carboxyl-terminal hydrolase 7 OS=Homo sapiens GN=USP7 PE=1 SV=2 - [UBP7_HUMAN]                          | 2.90  | 1 | 1 | 1 | 1  | 1.16 | 0.88 | 1.33 | 1.01 |      |      |      |      |      | 1102 | 128.2 | 5.55 |       |      |
| P15374 | Ubiquitin carboxyl-terminal hydrolase isozyme L3 OS=Homo sapiens GN=UCHL3 PE=1 SV=1 - [UCHL3_HUMAN]               | 6.52  | 1 | 2 | 2 | 4  | 1.24 | 0.78 | 1.08 | 0.65 | 0.95 | 0.79 | 0.96 | 0.80 |      | 230  | 26.2  | 4.92 |       |      |
| Q9Y5K5 | Ubiquitin carboxyl-terminal hydrolase isozyme L5 OS=Homo sapiens GN=UCHL5 PE=1 SV=3 - [UCHL5_HUMAN]               | 6.99  | 1 | 1 | 1 | 1  |      |      |      |      |      |      |      | 1.00 | 0.71 | 0.95 | 0.67  | 329  | 37.6  | 5.33 |
| Q14139 | Ubiquitin conjugation factor E4 A OS=Homo sapiens GN=UBE4A PE=1 SV=2 - [UBE4A_HUMAN]                              | 1.78  | 1 | 1 | 1 | 4  |      |      |      |      |      |      |      | 0.10 | 0.05 | 1.01 | 0.48  | 1066 | 122.5 | 5.24 |
| Q92890 | Ubiquitin fusion degradation protein 1 homolog OS=Homo sapiens GN=UFD1L PE=1 SV=3 - [UFD1_HUMAN]                  | 4.23  | 1 | 1 | 1 | 3  |      |      |      |      |      |      |      | 1.19 | 1.13 | 1.14 | 1.09  | 307  | 34.5  | 6.70 |
| P57075 | Ubiquitin-associated and SH3 domain-containing protein A OS=Homo sapiens GN=UBASH3A PE=1 SV=1 - [UBS3A_HUMAN]     | 2.12  | 1 | 1 | 1 | 1  | 1.14 | 1.40 | 1.17 | 1.46 |      |      |      |      |      |      |       | 661  | 74.1  | 7.66 |
| Q9BSL1 | Ubiquitin-associated domain-containing protein 1 OS=Homo sapiens GN=UBAC1 PE=1 SV=1 - [UBAC1_HUMAN]               | 1.98  | 1 | 1 | 1 | 3  |      |      |      |      |      |      |      | 1.65 | 1.21 | 1.54 | 1.39  | 405  | 45.3  | 4.92 |
| Q14157 | Ubiquitin-associated protein 2-like OS=Homo sapiens GN=UBAP2L PE=1 SV=2 - [UBP2L_HUMAN]                           | 2.30  | 1 | 1 | 1 | 1  |      |      |      |      |      |      |      | 0.83 | 0.86 | 0.80 | 0.83  | 1087 | 114.5 | 7.11 |
| P68036 | Ubiquitin-conjugating enzyme E2 L3 OS=Homo sapiens GN=UBE2L3 PE=1 SV=1 - [UB2L3_HUMAN]                            | 31.82 | 1 | 3 | 3 | 13 | 0.87 | 0.86 | 0.87 | 0.86 | 1.07 | 0.99 | 0.95 | 0.84 |      | 154  | 17.9  | 8.51 |       |      |
| P61088 | Ubiquitin-conjugating enzyme E2 N OS=Homo sapiens GN=UBE2N PE=1 SV=1 - [UBE2N_HUMAN]                              | 17.76 | 2 | 3 | 3 | 8  | 0.89 | 1.01 | 0.75 | 0.87 | 1.16 | 1.05 | 1.09 | 0.99 |      | 152  | 17.1  | 6.57 |       |      |
| Q9C0C9 | Ubiquitin-conjugating enzyme E2 O OS=Homo sapiens GN=UBE2O PE=1 SV=3 - [UBE2O_HUMAN]                              | 2.01  | 1 | 2 | 2 | 7  | 0.68 |      | 0.90 |      | 2.61 | 2.41 | 2.37 | 2.18 |      | 1292 | 141.2 | 5.12 |       |      |
| Q13404 | Ubiquitin-conjugating enzyme E2 variant 1 OS=Homo sapiens GN=UBE2V1 PE=1 SV=2 - [UB2V1_HUMAN]                     | 30.61 | 2 | 4 | 4 | 23 | 0.84 | 0.83 | 0.88 | 0.87 | 1.15 | 1.10 | 1.13 | 1.06 |      | 147  | 16.5  | 7.93 |       |      |
| Q96B02 | Ubiquitin-conjugating enzyme E2 W OS=Homo sapiens GN=UBE2W PE=1 SV=1 - [UBE2W_HUMAN]                              | 16.56 | 1 | 1 | 1 | 2  | 1.07 | 0.73 | 1.13 | 0.78 |      |      |      |      |      | 151  | 17.3  | 7.75 |       |      |
| A1L167 | Ubiquitin-conjugating enzyme E2Q-like protein 1 OS=Homo sapiens GN=UBE2QL1 PE=2 SV=2 - [U2QL1_HUMAN]              | 8.07  | 1 | 1 | 1 | 1  | 0.90 | 0.90 | 0.93 | 0.93 |      |      |      |      |      | 161  | 18.3  | 7.96 |       |      |
| P61960 | Ubiquitin-fold modifier 1 OS=Homo sapiens GN=UFM1 PE=1 SV=1 - [UFM1_HUMAN]                                        | 32.94 | 1 | 1 | 1 | 1  |      |      |      |      |      |      |      | 0.83 | 1.00 | 0.96 | 1.16  | 85   | 9.1   | 9.31 |
| Q9Y3C8 | Ubiquitin-fold modifier-conjugating enzyme 1 OS=Homo sapiens GN=UFC1 PE=1 SV=3 - [UFC1_HUMAN]                     | 7.78  | 1 | 1 | 1 | 1  |      |      |      |      |      |      |      | 0.81 | 0.65 | 0.69 | 0.56  | 167  | 19.4  | 7.40 |
| P22314 | Ubiquitin-like modifier-activating enzyme 1 OS=Homo sapiens GN=UBA1 PE=1 SV=3 - [UBA1_HUMAN]                      | 6.05  | 1 | 5 | 5 | 8  | 0.69 | 0.65 | 0.71 | 0.61 |      |      |      |      |      | 1058 | 117.8 | 5.76 |       |      |
| P41226 | Ubiquitin-like modifier-activating enzyme 7 OS=Homo sapiens GN=UBA7 PE=1 SV=2 - [UBA7_HUMAN]                      | 1.58  | 1 | 1 | 1 | 3  |      |      |      |      |      |      |      | 1.21 | 1.29 | 1.20 | 1.28  | 1012 | 111.6 | 6.04 |
| Q9BZL1 | Ubiquitin-like protein 5 OS=Homo sapiens GN=UBL5 PE=1 SV=1 - [UBL5_HUMAN]                                         | 12.33 | 1 | 1 | 1 | 2  |      |      |      |      |      |      |      | 1.13 | 1.10 | 1.12 | 1.08  | 73   | 8.5   | 8.44 |
| Q05086 | Ubiquitin-protein ligase E3A OS=Homo sapiens GN=UBE3A PE=1 SV=4 - [UBE3A_HUMAN]                                   | 2.86  | 1 | 2 | 2 | 2  | 0.71 | 0.44 | 0.85 | 0.52 | 0.11 | 0.12 | 0.12 | 0.13 |      | 875  | 100.6 | 5.22 |       |      |
| Q7Z3V4 | Ubiquitin-protein ligase E3B OS=Homo sapiens GN=UBE3B PE=1 SV=3 - [UBE3B_HUMAN]                                   | 4.03  | 3 | 2 | 3 | 3  | 0.76 | 0.68 | 0.31 | 0.28 | 0.63 | 0.71 | 0.58 | 0.65 |      | 1068 | 123.0 | 8.19 |       |      |
| Q92575 | UBX domain-containing protein 4 OS=Homo sapiens GN=UBXN4 PE=1 SV=2 - [UBXN4_HUMAN]                                | 5.31  | 1 | 1 | 1 | 1  | 0.38 |      | 0.40 |      |      |      |      |      |      | 508  | 56.7  | 6.38 |       |      |
| Q9NY97 | UDP-GlcNAc:betaGal beta-1,3-N-acetylglucosaminyltransferase 2 OS=Homo sapiens GN=B3GNT2 PE=1 SV=2 - [B3GN2_HUMAN] | 5.79  | 1 | 2 | 2 | 4  | 1.14 | 1.04 | 1.19 | 1.10 | 0.86 | 0.78 | 0.91 | 0.83 |      | 397  | 46.0  | 8.54 |       |      |
| Q9C0J1 | UDP-GlcNAc:betaGal beta-1,3-N-acetylglucosaminyltransferase 4 OS=Homo sapiens GN=B3GNT4 PE=2 SV=1 - [B3GN4_HUMAN] | 5.82  | 1 | 1 | 1 | 1  | 1.06 | 1.01 | 1.10 | 1.05 |      |      |      |      |      | 378  | 42.3  | 9.29 |       |      |
| Q7Z7M8 | UDP-GlcNAc:betaGal beta-1,3-N-acetylglucosaminyltransferase 8 OS=Homo sapiens GN=B3GNT8 PE=1 SV=1 - [B3GN8_HUMAN] | 5.04  | 1 | 1 | 1 | 2  | 0.97 | 0.93 | 0.80 | 0.78 |      |      |      |      |      | 397  | 43.4  | 8.32 |       |      |
| Q14376 | UDP-glucose 4-epimerase OS=Homo sapiens GN=GALE PE=1 SV=2 - [GALE_HUMAN]                                          | 2.87  | 1 | 1 | 1 | 1  |      |      |      |      |      |      |      | 0.76 | 0.87 | 0.78 | 0.89  | 348  | 38.3  | 6.73 |

|        |                                                                                                                                     |       |   |   |   |     |      |      |      |      |      |      |       |       |      |       |      |
|--------|-------------------------------------------------------------------------------------------------------------------------------------|-------|---|---|---|-----|------|------|------|------|------|------|-------|-------|------|-------|------|
| Q9NYU2 | UDP-glucose:glycoprotein glucosyltransferase 1 OS=Homo sapiens GN=UGGT1 PE=1 SV=3 - [UGGG1_HUMAN]                                   | 2.44  | 1 | 2 | 2 | 2   | 0.75 | 0.81 | 0.85 | 0.91 |      | 1555 | 177.1 | 5.63  |      |       |      |
| Q9NYU1 | UDP-glucose:glycoprotein glucosyltransferase 2 OS=Homo sapiens GN=UGGT2 PE=1 SV=4 - [UGGG2_HUMAN]                                   | 1.12  | 1 | 1 | 2 | 2   |      |      |      |      | 0.88 | 0.87 | 1516  | 174.6 | 6.89 |       |      |
| P35504 | UDP-glucuronosyltransferase 1-5 OS=Homo sapiens GN=UGT1A5 PE=2 SV=1 - [UD15_HUMAN]                                                  | 5.06  | 2 | 1 | 2 | 4   | 1.15 | 1.38 | 1.06 | 1.31 |      | 534  | 60.0  | 8.06  |      |       |      |
| O60656 | UDP-glucuronosyltransferase 1-9 OS=Homo sapiens GN=UGT1A9 PE=1 SV=1 - [UD19_HUMAN]                                                  | 2.26  | 3 | 1 | 1 | 9   | 0.97 | 1.04 | 0.95 | 1.02 | 1.22 | 0.90 | 1.27  | 0.94  | 530  | 59.9  | 7.90 |
| O75310 | UDP-glucuronosyltransferase 2B11 OS=Homo sapiens GN=UGT2B11 PE=2 SV=1 - [UDB11_HUMAN]                                               | 4.73  | 1 | 2 | 2 | 3   | 0.76 | 0.89 | 0.86 | 1.01 | 0.14 | 0.15 | 0.14  | 0.15  | 529  | 61.0  | 8.92 |
| Q9H3H5 | UDP-N-acetylglucosamine--dolichyl-phosphate N-acetylglucosaminophosphotransferase OS=Homo sapiens GN=DPAGT1 PE=1 SV=2 - [GPT_HUMAN] | 1.23  | 1 | 1 | 1 | 1   |      |      |      |      | 0.63 | 0.80 | 0.76  | 0.98  | 408  | 46.1  | 8.00 |
| Q6BDS2 | UHRF1-binding protein 1 OS=Homo sapiens GN=UHRF1BP1 PE=1 SV=1 - [URFB1_HUMAN]                                                       | 0.83  | 1 | 1 | 1 | 11  |      |      |      |      | 0.78 | 0.90 | 0.80  | 0.96  | 1440 | 159.4 | 6.14 |
| Q5EBM0 | UMP-CMP kinase 2, mitochondrial OS=Homo sapiens GN=CMPK2 PE=1 SV=3 - [CMPK2_HUMAN]                                                  | 2.23  | 1 | 1 | 1 | 2   | 0.72 | 0.68 | 0.66 | 0.61 |      |      |       |       | 449  | 49.4  | 7.01 |
| P30085 | UMP-CMP kinase OS=Homo sapiens GN=CMPK1 PE=1 SV=3 - [KCY_HUMAN]                                                                     | 13.78 | 1 | 2 | 2 | 13  |      |      |      |      | 1.12 | 1.23 | 1.02  | 1.22  | 196  | 22.2  | 5.57 |
| Q96GV9 | UNC119-binding protein C5orf30 OS=Homo sapiens GN=C5orf30 PE=1 SV=1 - [CE030_HUMAN]                                                 | 4.85  | 1 | 1 | 1 | 1   |      |      |      |      | 0.71 | 0.83 | 0.61  | 0.71  | 206  | 23.1  | 9.45 |
| Q69YW2 | Uncharacterized membrane protein C1orf95 OS=Homo sapiens GN=C1orf95 PE=2 SV=1 - [CA095_HUMAN]                                       | 5.67  | 1 | 1 | 1 | 1   | 0.88 | 0.86 | 0.77 | 0.75 |      |      |       |       | 141  | 15.0  | 7.21 |
| Q6PEX7 | Uncharacterized protein ATPAF1-AS1 OS=Homo sapiens GN=ATPAF1-AS1 PE=2 SV=3 - [ATAS1_HUMAN]                                          | 9.71  | 1 | 1 | 1 | 1   | 1.10 | 1.04 | 1.10 | 1.05 |      |      |       |       | 206  | 23.3  | 6.27 |
| Q8TEF2 | Uncharacterized protein C10orf105 OS=Homo sapiens GN=C10orf105 PE=2 SV=3 - [CJ105_HUMAN]                                            | 7.52  | 1 | 1 | 1 | 1   | 1.14 | 1.16 | 0.82 | 0.85 |      |      |       |       | 133  | 14.5  | 8.41 |
| Q8N655 | Uncharacterized protein C10orf12 OS=Homo sapiens GN=C10orf12 PE=1 SV=1 - [CJ012_HUMAN]                                              | 4.89  | 1 | 3 | 3 | 5   | 1.08 | 1.09 | 1.09 | 1.11 | 1.09 | 1.34 | 1.17  | 1.44  | 1247 | 137.1 | 8.24 |
| A6NCD4 | Uncharacterized protein C10orf131 OS=Homo sapiens GN=C10orf131 PE=4 SV=3 - [CJ131_HUMAN]                                            | 3.13  | 1 | 1 | 1 | 2   |      |      |      |      | 0.57 | 0.51 | 1.45  | 1.31  | 256  | 29.6  | 6.19 |
| Q5SWW7 | Uncharacterized protein C10orf55 OS=Homo sapiens GN=C10orf55 PE=2 SV=1 - [CJ055_HUMAN]                                              | 3.31  | 1 | 1 | 1 | 1   |      |      |      |      | 1.10 | 1.06 | 1.05  | 1.01  | 151  | 16.0  | 7.43 |
| Q711Q0 | Uncharacterized protein C10orf71 OS=Homo sapiens GN=C10orf71 PE=2 SV=2 - [CJ071_HUMAN]                                              | 1.81  | 1 | 1 | 1 | 1   |      |      |      |      | 0.87 | 1.35 | 1.31  | 2.03  | 1435 | 156.4 | 6.38 |
| Q96A22 | Uncharacterized protein C11orf52 OS=Homo sapiens GN=C11orf52 PE=1 SV=2 - [CK052_HUMAN]                                              | 4.07  | 1 | 1 | 1 | 1   | 0.90 | 0.69 | 1.20 | 0.92 |      |      |       |       | 123  | 13.9  | 9.41 |
| Q53FT3 | Uncharacterized protein C11orf73 OS=Homo sapiens GN=C11orf73 PE=1 SV=2 - [CK073_HUMAN]                                              | 5.08  | 1 | 1 | 1 | 1   |      |      |      |      | 0.89 | 0.81 | 0.95  | 0.86  | 197  | 21.6  | 5.45 |
| Q3KP22 | Uncharacterized protein C11orf85 OS=Homo sapiens GN=C11orf85 PE=2 SV=1 - [CK085_HUMAN]                                              | 4.63  | 1 | 1 | 1 | 1   |      |      |      |      | 0.61 | 1.14 | 0.53  | 0.99  | 216  | 24.8  | 9.33 |
| Q8TC90 | Uncharacterized protein C12orf12 OS=Homo sapiens GN=C12orf12 PE=2 SV=1 - [CL012_HUMAN]                                              | 3.45  | 1 | 1 | 1 | 20  |      |      |      |      | 0.79 | 0.81 | 0.76  | 0.74  | 406  | 46.5  | 4.64 |
| Q9HCM1 | Uncharacterized protein C12orf35 OS=Homo sapiens GN=C12orf35 PE=1 SV=3 - [CL035_HUMAN]                                              | 2.35  | 1 | 2 | 2 | 2   |      |      |      |      | 2.99 | 2.72 | 2.01  | 1.74  | 1747 | 194.7 | 8.78 |
| Q96N23 | Uncharacterized protein C12orf55 OS=Homo sapiens GN=C12orf55 PE=2 SV=2 - [CL055_HUMAN]                                              | 5.42  | 6 | 3 | 4 | 102 | 0.79 | 0.75 | 0.87 | 0.83 |      |      |       |       | 812  | 92.3  | 7.71 |
| Q5U649 | Uncharacterized protein C12orf60 OS=Homo sapiens GN=C12orf60 PE=2 SV=2 - [CL060_HUMAN]                                              | 4.49  | 1 | 1 | 1 | 2   | 1.15 | 1.02 | 1.30 | 1.15 |      |      |       |       | 245  | 27.6  | 7.96 |
| A6NFE2 | Uncharacterized protein C12orf70 OS=Homo sapiens GN=C12orf70 PE=2 SV=2 - [CL070_HUMAN]                                              | 6.71  | 1 | 2 | 2 | 3   | 0.71 | 0.57 | 1.32 | 1.06 | 1.32 | 1.03 | 1.18  | 0.92  | 343  | 39.5  | 4.86 |
| Q9NWQ4 | Uncharacterized protein C14orf118 OS=Homo sapiens GN=C14orf118 PE=1 SV=3 - [CN118_HUMAN]                                            | 3.53  | 1 | 1 | 1 | 1   |      |      |      |      | 0.73 | 0.88 | 0.65  | 0.78  | 482  | 54.2  | 8.44 |
| Q9H367 | Uncharacterized protein C14orf57 OS=Homo sapiens GN=C14orf57 PE=2 SV=1 - [CN057_HUMAN]                                              | 11.81 | 1 | 1 | 1 | 1   |      |      |      |      | 0.99 | 0.36 | 0.79  | 0.29  | 127  | 14.7  | 9.25 |

|        |                                                                                             |       |   |   |   |    |      |      |      |      |      |      |       |      |       |       |      |
|--------|---------------------------------------------------------------------------------------------|-------|---|---|---|----|------|------|------|------|------|------|-------|------|-------|-------|------|
| Q9Y2V0 | Uncharacterized protein C15orf41 OS=Homo sapiens<br>GN=C15orf41 PE=2 SV=2 - [CO041_HUMAN]   | 13.52 | 1 | 2 | 3 | 6  | 1.14 | 1.03 | 1.19 | 1.14 |      | 281  | 32.2  | 6.62 |       |       |      |
| Q9H0I2 | Uncharacterized protein C16orf48 OS=Homo sapiens<br>GN=C16orf48 PE=2 SV=1 - [CP048_HUMAN]   | 3.47  | 1 | 1 | 1 | 1  |      |      |      | 1.09 | 1.19 | 1.10 | 1.19  | 346  | 38.7  | 9.80  |      |
| Q8WTO4 | Uncharacterized protein C16orf78 OS=Homo sapiens<br>GN=C16orf78 PE=2 SV=1 - [CP078_HUMAN]   | 10.57 | 1 | 2 | 2 | 2  | 1.38 | 1.41 | 1.34 | 1.38 |      | 265  | 30.8  | 9.79 |       |       |      |
| Q6ZW13 | Uncharacterized protein C16orf86 OS=Homo sapiens<br>GN=C16orf86 PE=2 SV=2 - [CP086_HUMAN]   | 3.79  | 1 | 1 | 1 | 3  | 1.02 | 1.07 | 1.03 | 1.08 |      | 317  | 33.5  | 5.38 |       |       |      |
| Q8NEP4 | Uncharacterized protein C17orf47 OS=Homo sapiens<br>GN=C17orf47 PE=1 SV=3 - [CQ047_HUMAN]   | 5.44  | 1 | 2 | 2 | 6  | 0.86 | 0.88 | 0.84 | 0.91 | 1.27 | 1.31 | 1.37  | 1.41 | 570   | 63.1  | 9.20 |
| A2RTY3 | Uncharacterized protein C17orf66 OS=Homo sapiens<br>GN=C17orf66 PE=2 SV=2 - [CQ066_HUMAN]   | 2.81  | 1 | 1 | 1 | 1  |      |      |      | 1.51 | 1.79 | 1.47 | 1.74  | 570  | 65.6  | 9.20  |      |
| P0C7W0 | Uncharacterized protein C17orf72 OS=Homo sapiens<br>GN=C17orf72 PE=2 SV=1 - [CQ072_HUMAN]   | 11.11 | 1 | 1 | 1 | 3  | 0.79 | 0.53 | 0.80 | 0.55 |      | 189  | 20.6  | 4.79 |       |       |      |
| Q9BSJ5 | Uncharacterized protein C17orf80 OS=Homo sapiens<br>GN=C17orf80 PE=1 SV=2 - [CQ080_HUMAN]   | 2.79  | 1 | 1 | 1 | 1  | 1.25 | 1.20 | 1.24 | 1.20 |      | 609  | 67.3  | 9.16 |       |       |      |
| Q5BJE1 | Uncharacterized protein C18orf34 OS=Homo sapiens<br>GN=C18orf34 PE=1 SV=3 - [CR034_HUMAN]   | 2.42  | 1 | 2 | 2 | 2  | 0.95 | 0.96 | 1.01 | 1.02 |      | 867  | 101.9 | 6.77 |       |       |      |
| A6NGS2 | Uncharacterized protein C19orf69 OS=Homo sapiens<br>GN=C19orf69 PE=2 SV=2 - [CS069_HUMAN]   | 26.92 | 1 | 1 | 1 | 2  |      |      |      | 1.23 | 1.64 | 1.03 | 1.37  | 130  | 14.5  | 4.28  |      |
| Q3KP66 | Uncharacterized protein C1orf106 OS=Homo sapiens<br>GN=C1orf106 PE=2 SV=2 - [CA106_HUMAN]   | 4.68  | 1 | 2 | 2 | 3  |      |      |      | 0.85 | 0.80 | 1.31 | 1.54  | 663  | 72.9  | 9.31  |      |
| Q5SNV9 | Uncharacterized protein C1orf167 OS=Homo sapiens<br>GN=C1orf167 PE=2 SV=2 - [CA167_HUMAN]   | 1.29  | 1 | 1 | 1 | 1  |      |      |      | 0.48 | 0.12 | 0.52 | 0.13  | 1468 | 162.3 | 10.70 |      |
| Q5VWT5 | Uncharacterized protein C1orf168 OS=Homo sapiens<br>GN=C1orf168 PE=2 SV=1 - [CA168_HUMAN]   | 3.71  | 1 | 2 | 2 | 3  | 1.41 | 1.24 | 1.44 | 1.28 | 1.10 | 0.84 | 1.32  | 1.00 | 728   | 82.0  | 8.38 |
| Q8NAX2 | Uncharacterized protein C1orf172 OS=Homo sapiens<br>GN=C1orf172 PE=2 SV=2 - [CA172_HUMAN]   | 11.06 | 1 | 1 | 1 | 1  |      |      |      | 1.63 | 1.96 | 1.72 | 2.07  | 398  | 43.6  | 6.54  |      |
| Q9H425 | Uncharacterized protein C1orf198 OS=Homo sapiens<br>GN=C1orf198 PE=1 SV=1 - [CA198_HUMAN]   | 3.67  | 1 | 1 | 1 | 2  |      |      |      | 0.93 | 0.85 | 1.05 | 0.97  | 327  | 36.3  | 5.72  |      |
| Q9H246 | Uncharacterized protein C1orf21 OS=Homo sapiens<br>GN=C1orf21 PE=1 SV=1 - [CA021_HUMAN]     | 7.44  | 1 | 1 | 1 | 1  |      |      |      | 0.85 | 0.71 | 0.84 | 0.70  | 121  | 13.9  | 5.22  |      |
| Q9BUN1 | Uncharacterized protein C1orf56 OS=Homo sapiens<br>GN=C1orf56 PE=1 SV=1 - [CA056_HUMAN]     | 14.08 | 1 | 4 | 4 | 27 | 0.94 | 0.88 | 0.89 | 0.81 | 0.61 | 0.59 | 0.76  | 0.78 | 341   | 36.7  | 8.59 |
| Q9H579 | Uncharacterized protein C20orf132 OS=Homo sapiens<br>GN=C20orf132 PE=2 SV=2 - [CT132_HUMAN] | 5.59  | 1 | 2 | 2 | 3  | 0.84 | 0.75 | 0.74 | 0.66 | 0.51 | 0.98 | 0.66  | 1.08 | 483   | 54.8  | 6.40 |
| Q9BQM9 | Uncharacterized protein C20orf144 OS=Homo sapiens<br>GN=C20orf144 PE=2 SV=1 - [CT144_HUMAN] | 5.23  | 1 | 1 | 1 | 1  |      |      |      | 0.75 | 0.50 | 0.96 | 0.65  | 153  | 17.2  | 11.47 |      |
| Q96M20 | Uncharacterized protein C20orf152 OS=Homo sapiens<br>GN=C20orf152 PE=2 SV=2 - [CT152_HUMAN] | 6.60  | 1 | 3 | 3 | 3  | 0.66 | 0.60 | 0.89 | 0.81 | 0.77 | 0.88 | 0.97  | 1.16 | 576   | 67.5  | 9.26 |
| Q9H1L0 | Uncharacterized protein C20orf166 OS=Homo sapiens<br>GN=C20orf166 PE=2 SV=1 - [CT166_HUMAN] | 25.64 | 1 | 1 | 1 | 1  | 1.06 | 1.01 | 1.17 | 1.12 |      | 117  | 12.4  | 6.87 |       |       |      |
| A1L168 | Uncharacterized protein C20orf202 OS=Homo sapiens<br>GN=C20orf202 PE=2 SV=2 - [CT202_HUMAN] | 4.10  | 1 | 1 | 1 | 2  |      |      |      | 1.11 | 1.07 | 0.75 | 0.72  | 122  | 13.6  | 8.97  |      |
| Q8N2C9 | Uncharacterized protein C21orf128 OS=Homo sapiens<br>GN=C21orf128 PE=2 SV=3 - [CU128_HUMAN] | 8.64  | 1 | 1 | 1 | 1  |      |      |      | 0.59 | 0.35 | 0.85 | 0.51  | 162  | 18.0  | 7.62  |      |
| Q6PGQ1 | Uncharacterized protein C22orf43 OS=Homo sapiens<br>GN=C22orf43 PE=2 SV=1 - [CV043_HUMAN]   | 7.86  | 1 | 1 | 1 | 1  | 0.85 | 0.75 | 1.03 | 0.92 |      | 229  | 25.0  | 4.11 |       |       |      |
| P86434 | Uncharacterized protein C22orf45 OS=Homo sapiens<br>GN=C22orf45 PE=2 SV=1 - [CV045_HUMAN]   | 3.14  | 1 | 1 | 1 | 1  |      |      |      | 0.96 | 1.37 | 0.94 | 1.35  | 159  | 17.2  | 6.65  |      |
| A6NCX1 | Uncharacterized protein C2orf14-like 1 OS=Homo sapiens<br>PE=4 SV=1 - [CB141_HUMAN]         | 16.10 | 3 | 1 | 1 | 1  | 0.71 | 1.03 | 0.63 | 0.93 |      | 118  | 12.4  | 9.26 |       |       |      |
| Q8WU43 | Uncharacterized protein C2orf15 OS=Homo sapiens<br>GN=C2orf15 PE=2 SV=1 - [CB015_HUMAN]     | 16.00 | 1 | 1 | 1 | 3  | 1.11 | 0.95 |      |      |      | 125  | 13.7  | 6.30 |       |       |      |

|        |                                                                                                        |       |   |   |   |    |      |      |      |      |      |      |       |       |      |       |       |
|--------|--------------------------------------------------------------------------------------------------------|-------|---|---|---|----|------|------|------|------|------|------|-------|-------|------|-------|-------|
| Q68DN1 | Uncharacterized protein C2orf16 OS=Homo sapiens<br>GN=C2orf16 PE=1 SV=3 - [CB016_HUMAN]                | 2.72  | 1 | 2 | 2 | 4  | 1.26 | 1.29 | 1.06 | 1.10 |      | 1984 | 224.2 | 10.08 |      |       |       |
| Q9NWW7 | Uncharacterized protein C2orf42 OS=Homo sapiens<br>GN=C2orf42 PE=2 SV=1 - [CB042_HUMAN]                | 2.26  | 1 | 1 | 1 | 1  | 0.12 | 0.11 | 0.13 | 0.12 |      | 574  | 64.0  | 8.92  |      |       |       |
| Q8WWC4 | Uncharacterized protein C2orf47, mitochondrial OS=Homo sapiens<br>GN=C2orf47 PE=1 SV=1 - [CB047_HUMAN] | 3.44  | 1 | 1 | 1 | 2  | 0.96 | 1.07 | 0.95 | 1.08 | 0.78 | 1.02 | 0.45  | 0.58  | 291  | 32.5  | 9.17  |
| Q6NV74 | Uncharacterized protein C2orf55 OS=Homo sapiens<br>GN=C2orf55 PE=1 SV=3 - [CB055_HUMAN]                | 3.95  | 1 | 2 | 2 | 2  |      |      |      |      | 1.13 | 0.93 | 1.22  | 1.00  | 962  | 102.1 | 7.96  |
| Q7Z7H3 | Uncharacterized protein C2orf62 OS=Homo sapiens<br>GN=C2orf62 PE=2 SV=1 - [CB062_HUMAN]                | 3.36  | 1 | 1 | 1 | 2  | 1.19 | 1.68 | 1.25 | 1.75 | 1.00 | 0.61 | 1.41  | 0.86  | 387  | 43.9  | 5.41  |
| Q8NHS4 | Uncharacterized protein C2orf63 OS=Homo sapiens<br>GN=C2orf63 PE=2 SV=3 - [CB063_HUMAN]                | 1.19  | 1 | 1 | 1 | 1  | 0.97 | 1.03 | 1.10 | 1.17 |      |      |       |       | 586  | 67.2  | 6.49  |
| Q8TC57 | Uncharacterized protein C2orf65 OS=Homo sapiens<br>GN=C2orf65 PE=2 SV=1 - [CB065_HUMAN]                | 0.94  | 1 | 1 | 1 | 1  |      |      |      |      | 0.22 | 1.32 | 0.25  | 1.51  | 530  | 59.3  | 6.87  |
| A6NGG8 | Uncharacterized protein C2orf71 OS=Homo sapiens<br>GN=C2orf71 PE=1 SV=1 - [CB071_HUMAN]                | 1.01  | 1 | 1 | 1 | 1  | 0.80 | 0.81 | 0.82 | 0.83 |      |      |       |       | 1288 | 139.6 | 8.07  |
| Q9UK00 | Uncharacterized protein C3orf18 OS=Homo sapiens<br>GN=C3orf18 PE=2 SV=2 - [CC018_HUMAN]                | 10.49 | 1 | 1 | 1 | 2  | 0.22 | 0.11 | 0.62 | 0.32 |      |      |       |       | 162  | 17.5  | 5.54  |
| Q8ND61 | Uncharacterized protein C3orf20 OS=Homo sapiens<br>GN=C3orf20 PE=1 SV=2 - [CC020_HUMAN]                | 3.43  | 1 | 2 | 2 | 5  | 1.00 | 0.93 | 1.20 | 1.11 | 0.80 | 0.75 | 0.84  | 0.79  | 904  | 101.2 | 9.13  |
| Q3SXR2 | Uncharacterized protein C3orf36 OS=Homo sapiens<br>GN=C3orf36 PE=2 SV=1 - [CC036_HUMAN]                | 22.42 | 1 | 1 | 1 | 1  | 0.54 | 0.47 |      |      |      |      |       |       | 165  | 16.9  | 8.29  |
| Q86YA3 | Uncharacterized protein C4orf21 OS=Homo sapiens<br>GN=C4orf21 PE=1 SV=2 - [CD021_HUMAN]                | 2.17  | 1 | 2 | 2 | 4  | 0.87 | 0.52 | 0.85 | 0.51 | 0.32 | 0.37 | 0.30  | 0.36  | 1062 | 119.3 | 5.02  |
| Q8N412 | Uncharacterized protein C4orf37 OS=Homo sapiens<br>GN=C4orf37 PE=2 SV=1 - [CD037_HUMAN]                | 2.83  | 1 | 1 | 1 | 2  | 0.75 | 0.66 | 0.69 | 0.61 |      |      |       |       | 459  | 50.6  | 9.57  |
| Q8ND22 | Uncharacterized protein C5orf25 OS=Homo sapiens<br>GN=C5orf25 PE=1 SV=2 - [CE025_HUMAN]                | 3.56  | 4 | 1 | 3 | 11 | 0.96 | 0.99 | 0.96 | 1.00 |      |      |       |       | 872  | 96.8  | 6.62  |
| Q96MH7 | Uncharacterized protein C5orf34 OS=Homo sapiens<br>GN=C5orf34 PE=2 SV=2 - [CE034_HUMAN]                | 3.76  | 1 | 2 | 2 | 4  |      |      |      |      | 1.33 | 1.27 | 1.11  | 1.07  | 638  | 72.9  | 7.93  |
| A4QMS7 | Uncharacterized protein C5orf49 OS=Homo sapiens<br>GN=C5orf49 PE=2 SV=1 - [CE049_HUMAN]                | 5.44  | 1 | 1 | 1 | 1  | 2.28 | 2.36 | 2.47 | 2.58 |      |      |       |       | 147  | 17.0  | 7.59  |
| Q5SRN2 | Uncharacterized protein C6orf10 OS=Homo sapiens<br>GN=C6orf10 PE=1 SV=3 - [CF010_HUMAN]                | 2.66  | 1 | 1 | 1 | 1  | 1.45 | 0.79 | 1.37 | 0.75 |      |      |       |       | 563  | 61.6  | 9.25  |
| Q5T0Z8 | Uncharacterized protein C6orf132 OS=Homo sapiens<br>GN=C6orf132 PE=1 SV=4 - [CF132_HUMAN]              | 2.02  | 1 | 2 | 2 | 6  | 1.33 | 1.46 | 1.14 | 1.26 |      |      |       |       | 1188 | 124.0 | 9.45  |
| Q5TEZ5 | Uncharacterized protein C6orf163 OS=Homo sapiens<br>GN=C6orf163 PE=1 SV=2 - [CF163_HUMAN]              | 5.17  | 1 | 1 | 2 | 5  | 0.90 | 0.94 | 1.09 | 1.15 |      |      |       |       | 329  | 38.5  | 6.96  |
| Q5TF21 | Uncharacterized protein C6orf174 OS=Homo sapiens<br>GN=C6orf174 PE=2 SV=1 - [CF174_HUMAN]              | 1.06  | 1 | 1 | 1 | 5  | 1.08 | 1.08 | 1.21 | 1.40 |      |      |       |       | 947  | 103.1 | 6.06  |
| Q96N11 | Uncharacterized protein C7orf26 OS=Homo sapiens<br>GN=C7orf26 PE=2 SV=1 - [CG026_HUMAN]                | 4.01  | 1 | 1 | 1 | 1  | 1.05 | 0.59 | 1.08 | 0.61 |      |      |       |       | 449  | 50.0  | 7.69  |
| Q8WU49 | Uncharacterized protein C7orf33 OS=Homo sapiens<br>GN=C7orf33 PE=2 SV=1 - [CG033_HUMAN]                | 7.91  | 1 | 1 | 1 | 1  | 0.91 | 0.97 | 0.98 | 1.04 |      |      |       |       | 177  | 19.5  | 10.24 |
| A4D0V7 | Uncharacterized protein C7orf58 OS=Homo sapiens<br>GN=C7orf58 PE=2 SV=1 - [CG058_HUMAN]                | 1.07  | 1 | 1 | 1 | 1  | 1.09 | 1.02 | 1.34 | 1.25 |      |      |       |       | 1026 | 117.4 | 8.09  |
| A5D8W1 | Uncharacterized protein C7orf63 OS=Homo sapiens<br>GN=C7orf63 PE=2 SV=3 - [CG063_HUMAN]                | 3.29  | 1 | 2 | 2 | 3  |      |      |      |      | 2.00 | 2.44 | 1.50  | 1.83  | 941  | 105.8 | 7.17  |
| Q49A92 | Uncharacterized protein C8orf34 OS=Homo sapiens<br>GN=C8orf34 PE=1 SV=2 - [CH034_HUMAN]                | 1.77  | 1 | 1 | 1 | 1  | 0.58 | 0.64 | 0.69 | 0.77 |      |      |       |       | 452  | 50.5  | 5.05  |
| Q96LL4 | Uncharacterized protein C8orf48 OS=Homo sapiens<br>GN=C8orf48 PE=1 SV=2 - [CH048_HUMAN]                | 4.39  | 1 | 1 | 2 | 3  | 0.84 | 0.71 | 0.67 | 0.57 |      |      |       |       | 319  | 36.8  | 8.66  |
| C9J069 | Uncharacterized protein C9orf172 OS=Homo sapiens<br>GN=C9orf172 PE=3 SV=1 - [CI172_HUMAN]              | 2.77  | 1 | 1 | 1 | 1  |      |      |      |      | 0.77 | 0.82 | 0.83  | 0.88  | 976  | 106.6 | 9.03  |



|        |                                                                                                  |       |   |   |   |    |      |      |      |      |      |      |      |      |       |       |      |
|--------|--------------------------------------------------------------------------------------------------|-------|---|---|---|----|------|------|------|------|------|------|------|------|-------|-------|------|
| Q8N7X2 | Uncharacterized protein C9orf173 OS=Homo sapiens<br>GN=C9orf173 PE=2 SV=1 - [C1173_HUMAN]        | 10.80 | 1 | 2 | 2 | 6  | 1.00 | 0.97 | 1.02 | 0.99 | 1.03 | 1.28 | 0.95 | 1.18 | 389   | 42.8  | 9.99 |
| Q9P1Z9 | Uncharacterized protein C9orf174 OS=Homo sapiens<br>GN=C9orf174 PE=1 SV=2 - [C1174_HUMAN]        | 1.76  | 1 | 2 | 2 | 3  | 1.24 | 1.09 | 1.00 | 0.91 |      | 1.11 | 0.22 | 1646 | 191.0 | 6.04  |      |
| Q9P0K9 | Uncharacterized protein C9orf4 OS=Homo sapiens<br>GN=C9orf4 PE=2 SV=2 - [C1004_HUMAN]            | 3.49  | 1 | 1 | 1 | 1  | 1.06 | 1.11 | 1.05 | 1.12 |      |      |      | 344  | 37.2  | 7.62  |      |
| Q6ZRZ4 | Uncharacterized protein C9orf47 OS=Homo sapiens<br>GN=C9orf47 PE=1 SV=1 - [C1047_HUMAN]          | 14.85 | 1 | 1 | 1 | 1  | 1.09 | 1.61 | 0.83 | 1.24 |      |      |      | 202  | 22.3  | 10.07 |      |
| Q6ZTR5 | Uncharacterized protein CXorf22 OS=Homo sapiens<br>GN=CXorf22 PE=2 SV=3 - [CX022_HUMAN]          | 3.07  | 1 | 2 | 2 | 2  | 0.82 | 0.88 | 1.09 | 1.16 |      |      |      | 976  | 110.3 | 8.16  |      |
| A2AJT9 | Uncharacterized protein CXorf23 OS=Homo sapiens<br>GN=CXorf23 PE=1 SV=1 - [CX023_HUMAN]          | 1.69  | 1 | 1 | 1 | 1  |      |      |      |      | 4.60 | 3.40 | 4.37 | 3.23 | 711   | 83.8  | 9.70 |
| Q8TB03 | Uncharacterized protein CXorf38 OS=Homo sapiens<br>GN=CXorf38 PE=1 SV=1 - [CX038_HUMAN]          | 6.58  | 1 | 1 | 1 | 3  | 1.17 | 1.34 | 1.17 | 1.36 |      |      |      | 319  | 36.6  | 6.30  |      |
| Q9NQM4 | Uncharacterized protein CXorf41 OS=Homo sapiens<br>GN=CXorf41 PE=2 SV=1 - [CX041_HUMAN]          | 7.01  | 1 | 1 | 1 | 1  | 0.71 | 0.75 | 0.73 | 0.77 |      |      |      | 214  | 24.1  | 4.08  |      |
| Q8N7P7 | Uncharacterized protein FLJ40521 OS=Homo sapiens PE=1<br>SV=1 - [YH007_HUMAN]                    | 3.98  | 1 | 1 | 1 | 1  |      |      |      |      | 1.11 | 0.94 | 1.11 | 0.94 | 452   | 48.3  | 9.94 |
| Q6ZUG5 | Uncharacterized protein FLJ43738 OS=Homo sapiens PE=2<br>SV=1 - [YC006_HUMAN]                    | 9.27  | 1 | 3 | 3 | 5  | 1.67 | 1.30 | 1.37 | 1.07 | 0.58 | 0.59 | 0.74 | 0.75 | 572   | 66.0  | 7.30 |
| Q6ZU11 | Uncharacterized protein FLJ44066 OS=Homo sapiens PE=1<br>SV=1 - [YD002_HUMAN]                    | 1.30  | 1 | 1 | 1 | 1  | 1.15 | 1.39 | 1.22 | 1.49 |      |      |      | 926  | 104.4 | 8.88  |      |
| Q15053 | Uncharacterized protein KIAA0040 OS=Homo sapiens<br>GN=KIAA0040 PE=2 SV=1 - [K0040_HUMAN]        | 23.53 | 1 | 1 | 1 | 1  | 0.72 | 1.00 | 0.74 | 1.03 |      |      |      | 153  | 17.0  | 9.51  |      |
| Q9H714 | Uncharacterized protein KIAA0226L-like OS=Homo sapiens<br>GN=KIAA0226L PE=1 SV=3 - [K226L_HUMAN] | 4.83  | 1 | 3 | 3 | 4  | 1.28 | 1.06 | 1.18 | 0.92 | 0.93 | 0.89 | 0.85 | 0.81 | 662   | 73.4  | 6.04 |
| A3KMH1 | Uncharacterized protein KIAA0564 OS=Homo sapiens<br>GN=KIAA0564 PE=1 SV=2 - [K0564_HUMAN]        | 2.36  | 1 | 3 | 3 | 10 | 1.21 | 1.28 | 1.12 | 1.19 | 0.49 | 0.20 | 0.77 | 0.31 | 1905  | 214.7 | 7.40 |
| Q9BVV6 | Uncharacterized protein KIAA0586 OS=Homo sapiens<br>GN=KIAA0586 PE=1 SV=4 - [K0586_HUMAN]        | 1.17  | 1 | 1 | 1 | 1  | 0.21 | 0.32 | 0.40 | 0.62 |      |      |      | 1533 | 169.2 | 5.54  |      |
| A2RU30 | Uncharacterized protein KIAA0748 OS=Homo sapiens<br>GN=KIAA0748 PE=1 SV=2 - [K0748_HUMAN]        | 2.50  | 1 | 1 | 1 | 1  |      |      |      |      | 0.43 | 0.40 | 0.43 | 0.40 | 521   | 59.2  | 5.71 |
| Q8IV33 | Uncharacterized protein KIAA0825 OS=Homo sapiens<br>GN=KIAA0825 PE=2 SV=2 - [K0825_HUMAN]        | 5.18  | 1 | 4 | 5 | 7  | 3.96 | 3.62 | 3.91 | 3.57 | 1.26 | 1.13 | 1.02 | 1.05 | 1275  | 147.7 | 6.61 |
| O94964 | Uncharacterized protein KIAA0889 OS=Homo sapiens<br>GN=KIAA0889 PE=1 SV=2 - [K0889_HUMAN]        | 3.16  | 1 | 2 | 2 | 3  |      |      | 0.90 | 0.33 | 0.63 | 0.66 | 0.73 | 0.77 | 1423  | 159.7 | 6.46 |
| Q68EN5 | Uncharacterized protein KIAA0895L-like OS=Homo sapiens<br>GN=KIAA0895L PE=2 SV=1 - [K895L_HUMAN] | 3.82  | 1 | 1 | 1 | 1  | 1.08 | 0.71 | 1.07 | 0.71 |      |      |      | 471  | 53.4  | 9.17  |      |
| Q9UPP5 | Uncharacterized protein KIAA1107 OS=Homo sapiens<br>GN=KIAA1107 PE=1 SV=2 - [K1107_HUMAN]        | 3.34  | 1 | 3 | 3 | 3  | 0.79 | 0.90 | 0.80 | 0.92 | 1.61 | 1.12 | 1.22 | 0.85 | 1409  | 155.6 | 6.19 |
| Q2LD37 | Uncharacterized protein KIAA1109 OS=Homo sapiens<br>GN=KIAA1109 PE=1 SV=2 - [K1109_HUMAN]        | 1.36  | 1 | 5 | 5 | 5  | 1.32 | 1.16 | 1.42 | 1.24 | 0.83 | 0.86 | 0.92 | 0.96 | 5005  | 555.1 | 6.58 |
| Q96AT1 | Uncharacterized protein KIAA1143 OS=Homo sapiens<br>GN=KIAA1143 PE=1 SV=2 - [K1143_HUMAN]        | 9.74  | 1 | 1 | 1 | 2  | 0.98 | 1.05 | 0.98 | 1.05 |      |      |      | 154  | 17.5  | 6.11  |      |
| Q6ZU35 | Uncharacterized protein KIAA1211 OS=Homo sapiens<br>GN=KIAA1211 PE=1 SV=3 - [K1211_HUMAN]        | 2.03  | 1 | 2 | 2 | 3  |      |      |      |      | 1.77 | 1.85 | 1.69 | 1.76 | 1233  | 136.7 | 5.60 |
| Q86T90 | Uncharacterized protein KIAA1328 OS=Homo sapiens<br>GN=KIAA1328 PE=1 SV=2 - [K1328_HUMAN]        | 2.77  | 1 | 1 | 1 | 1  | 1.46 | 1.51 | 1.22 | 1.27 |      |      |      | 577  | 65.3  | 8.09  |      |
| Q9P2H0 | Uncharacterized protein KIAA1377 OS=Homo sapiens<br>GN=KIAA1377 PE=1 SV=3 - [K1377_HUMAN]        | 1.79  | 1 | 1 | 1 | 1  |      |      |      |      | 0.94 | 0.56 | 1.21 | 0.73 | 1117  | 125.8 | 8.76 |
| Q9P2G4 | Uncharacterized protein KIAA1383 OS=Homo sapiens<br>GN=KIAA1383 PE=1 SV=2 - [K1383_HUMAN]        | 1.77  | 1 | 1 | 1 | 2  | 1.10 | 1.52 | 0.79 | 1.09 |      |      |      | 905  | 100.3 | 7.17  |      |
| Q9HCI6 | Uncharacterized protein KIAA1586 OS=Homo sapiens<br>GN=KIAA1586 PE=2 SV=2 - [K1586_HUMAN]        | 4.19  | 1 | 2 | 2 | 2  | 1.13 | 1.57 | 0.84 | 1.18 |      |      |      | 787  | 89.6  | 7.74  |      |

|        |                                                                                                       |       |   |   |   |    |      |      |      |      |      |      |      |      |      |       |      |
|--------|-------------------------------------------------------------------------------------------------------|-------|---|---|---|----|------|------|------|------|------|------|------|------|------|-------|------|
| Q5VZ46 | Uncharacterized protein KIAA1614 OS=Homo sapiens<br>GN=KIAA1614 PE=2 SV=3 - [K1614_HUMAN]             | 1.26  | 1 | 1 | 1 | 8  | 2.22 | 2.39 | 2.13 | 2.31 | 1.70 | 1.62 | 1.69 | 1.61 | 1190 | 126.5 | 8.82 |
| Q5JY77 | Uncharacterized protein KIAA1755 OS=Homo sapiens<br>GN=KIAA1755 PE=2 SV=2 - [K1755_HUMAN]             | 4.33  | 1 | 3 | 3 | 6  | 1.03 | 0.91 | 0.91 | 0.82 | 1.21 | 1.15 | 1.18 | 1.11 | 1200 | 130.8 | 6.37 |
| Q5VW36 | Uncharacterized protein KIAA1797 OS=Homo sapiens<br>GN=KIAA1797 PE=1 SV=1 - [K1797_HUMAN]             | 3.16  | 1 | 3 | 3 | 3  | 1.57 | 1.90 | 1.49 | 1.81 | 0.72 | 0.71 | 0.90 | 0.89 | 1801 | 199.9 | 6.62 |
| Q96PW8 | Uncharacterized protein KIAA1920 OS=Homo sapiens<br>GN=CSPG4P5 PE=5 SV=2 - [K1920_HUMAN]              | 2.48  | 1 | 1 | 1 | 1  |      |      |      |      | 1.04 | 0.71 | 5.54 | 3.79 | 444  | 48.6  | 4.77 |
| Q8N8K9 | Uncharacterized protein KIAA1958 OS=Homo sapiens<br>GN=KIAA1958 PE=1 SV=1 - [K1958_HUMAN]             | 2.93  | 1 | 2 | 2 | 2  | 1.05 | 1.20 | 1.26 | 1.45 |      |      |      |      | 716  | 79.2  | 6.83 |
| Q0VF49 | Uncharacterized protein KIAA2012 OS=Homo sapiens<br>GN=KIAA2012 PE=2 SV=1 - [K2012_HUMAN]             | 2.35  | 1 | 1 | 1 | 3  | 1.50 | 1.50 | 1.42 | 1.44 |      |      |      |      | 553  | 65.1  | 6.42 |
| Q8IYS2 | Uncharacterized protein KIAA2013 OS=Homo sapiens<br>GN=KIAA2013 PE=2 SV=1 - [K2013_HUMAN]             | 1.10  | 1 | 1 | 1 | 2  |      |      |      |      | 0.51 | 0.78 | 0.61 | 0.92 | 634  | 69.1  | 8.19 |
| Q5QGS0 | Uncharacterized protein KIAA2022 OS=Homo sapiens<br>GN=KIAA2022 PE=2 SV=1 - [K2022_HUMAN]             | 1.65  | 1 | 1 | 1 | 1  | 0.87 | 0.71 | 0.74 | 0.61 |      |      |      |      | 1516 | 167.4 | 6.40 |
| Q6UX82 | Uncharacterized protein UNQ511/PRO1026 OS=Homo sapiens<br>GN=UNQ511/PRO1026 PE=2 SV=1 - [YA003_HUMAN] | 10.13 | 1 | 1 | 1 | 3  | 0.44 | 0.19 | 0.62 | 0.27 |      |      |      |      | 237  | 25.3  | 5.76 |
| O43795 | Unconventional myosin-Ib OS=Homo sapiens GN=MYO1B<br>PE=2 SV=3 - [MYO1B_HUMAN]                        | 2.38  | 1 | 2 | 2 | 2  |      |      |      |      | 0.84 | 0.88 | 0.86 | 0.90 | 1136 | 131.9 | 9.38 |
| O00160 | Unconventional myosin-Ig OS=Homo sapiens GN=MYO1F<br>PE=1 SV=3 - [MYO1F_HUMAN]                        | 3.46  | 1 | 3 | 3 | 3  | 0.84 | 0.53 | 0.93 | 0.61 |      |      |      |      | 1098 | 124.8 | 9.11 |
| B011T2 | Unconventional myosin-Ig OS=Homo sapiens GN=MYO1G<br>PE=1 SV=2 - [MYO1G_HUMAN]                        | 2.95  | 1 | 1 | 1 | 1  | 0.12 | 0.22 | 0.54 | 1.05 |      |      |      |      | 1018 | 116.4 | 8.73 |
| B2RTY4 | Unconventional myosin-Ixa OS=Homo sapiens GN=MYO9A<br>PE=1 SV=2 - [MYO9A_HUMAN]                       | 1.37  | 1 | 2 | 2 | 2  | 0.41 | 0.41 |      |      | 0.80 | 0.82 | 0.79 | 0.81 | 2548 | 292.5 | 8.88 |
| Q13459 | Unconventional myosin-Ixb OS=Homo sapiens GN=MYO9B<br>PE=1 SV=3 - [MYO9B_HUMAN]                       | 1.21  | 1 | 1 | 1 | 1  |      |      |      |      | 1.31 | 1.01 | 1.25 | 0.96 | 2157 | 243.2 | 8.75 |
| Q9ULV0 | Unconventional myosin-Vb OS=Homo sapiens GN=MYO5B<br>PE=1 SV=3 - [MYO5B_HUMAN]                        | 2.22  | 1 | 5 | 5 | 71 | 1.23 | 1.06 | 0.82 | 0.78 | 2.90 |      | 2.15 |      | 1848 | 213.5 | 7.20 |
| Q9NQX4 | Unconventional myosin-Vc OS=Homo sapiens GN=MYO5C<br>PE=1 SV=2 - [MYO5C_HUMAN]                        | 1.89  | 1 | 2 | 2 | 2  | 0.92 | 0.97 | 0.95 | 0.99 | 1.13 | 0.64 | 4.45 | 2.53 | 1742 | 202.7 | 7.71 |
| Q9UM54 | Unconventional myosin-VI OS=Homo sapiens GN=MYO6<br>PE=1 SV=4 - [MYO6_HUMAN]                          | 1.16  | 1 | 1 | 1 | 1  | 1.04 | 0.83 | 1.27 | 1.03 |      |      |      |      | 1294 | 149.6 | 8.53 |
| Q13402 | Unconventional myosin-VIIa OS=Homo sapiens GN=MYO7A<br>PE=1 SV=1 - [MYO7A_HUMAN]                      | 0.68  | 1 | 1 | 1 | 1  |      |      |      |      | 1.38 | 1.30 | 1.34 | 1.26 | 2215 | 254.2 | 8.56 |
| Q9UKN7 | Unconventional myosin-XV OS=Homo sapiens GN=MYO15A<br>PE=1 SV=2 - [MYO15_HUMAN]                       | 1.70  | 1 | 4 | 4 | 8  | 1.16 | 0.89 | 0.86 | 0.70 | 0.66 | 0.63 | 0.88 | 0.70 | 3530 | 395.0 | 9.17 |
| Q92614 | Unconventional myosin-XVIIIa OS=Homo sapiens<br>GN=MYO18A PE=1 SV=3 - [MY18A_HUMAN]                   | 1.61  | 1 | 2 | 2 | 3  |      |      |      |      | 0.97 | 0.87 | 1.25 | 1.11 | 2054 | 233.0 | 6.30 |
| Q8IUG5 | Unconventional myosin-XVIIIb OS=Homo sapiens<br>GN=MYO18B PE=1 SV=1 - [MY18B_HUMAN]                   | 0.51  | 1 | 1 | 1 | 2  | 1.05 |      | 1.04 |      | 0.80 | 0.77 | 1.02 | 0.99 | 2567 | 285.0 | 6.90 |
| Q9HD67 | Unconventional myosin-X OS=Homo sapiens GN=MYO10<br>PE=1 SV=3 - [MYO10_HUMAN]                         | 0.87  | 1 | 2 | 2 | 2  | 2.42 | 2.79 | 2.69 | 3.15 |      |      |      |      | 2058 | 237.2 | 6.21 |
| Q9H7C9 | UPF0366 protein C11orf67 OS=Homo sapiens GN=C11orf67<br>PE=1 SV=1 - [CK067_HUMAN]                     | 20.49 | 1 | 2 | 2 | 4  |      |      |      |      | 1.61 | 1.75 | 1.61 | 1.75 | 122  | 13.3  | 8.46 |
| Q14667 | UPF0378 protein KIAA0100 OS=Homo sapiens<br>GN=KIAA0100 PE=1 SV=3 - [K0100_HUMAN]                     | 2.64  | 1 | 3 | 3 | 5  | 0.99 | 0.93 | 0.97 | 0.76 |      |      |      |      | 2235 | 253.5 | 7.14 |
| Q7Z6I8 | UPF0461 protein C5orf24 OS=Homo sapiens GN=C5orf24<br>PE=1 SV=1 - [CE024_HUMAN]                       | 7.45  | 1 | 1 | 1 | 2  |      |      |      |      | 1.66 | 2.00 | 1.72 | 2.07 | 188  | 20.1  | 9.85 |
| Q9H7E9 | UPF0488 protein C8orf33 OS=Homo sapiens GN=C8orf33<br>PE=1 SV=1 - [CH033_HUMAN]                       | 5.68  | 1 | 1 | 1 | 2  | 0.93 | 0.79 | 0.71 | 0.77 |      |      |      |      | 229  | 25.0  | 9.95 |
| Q96A73 | UPF0498 protein KIAA1191 OS=Homo sapiens GN=KIAA1191<br>PE=1 SV=1 - [K1191_HUMAN]                     | 2.95  | 1 | 1 | 1 | 1  |      |      |      |      | 1.27 | 1.04 | 0.85 | 0.70 | 305  | 33.2  | 9.39 |

|        |                                                                                                |       |   |   |   |    |      |      |      |      |      |      |      |      |  |  |      |       |       |
|--------|------------------------------------------------------------------------------------------------|-------|---|---|---|----|------|------|------|------|------|------|------|------|--|--|------|-------|-------|
| Q8TAB5 | UPF0500 protein C1orf216 OS=Homo sapiens GN=C1orf216 PE=2 SV=1 - [CA216_HUMAN]                 | 5.68  | 1 | 1 | 1 | 1  | 1.07 | 1.03 | 1.04 | 1.02 |      |      |      |      |  |  | 229  | 25.0  | 5.30  |
| Q9NUL5 | UPF0515 protein C19orf66 OS=Homo sapiens GN=C19orf66 PE=2 SV=2 - [CS066_HUMAN]                 | 2.41  | 1 | 1 | 1 | 7  | 0.77 | 0.92 | 0.58 | 0.71 | 0.99 | 0.96 | 0.99 | 0.96 |  |  | 291  | 33.1  | 7.25  |
| Q969H8 | UPF0556 protein C19orf10 OS=Homo sapiens GN=C19orf10 PE=1 SV=1 - [CS010_HUMAN]                 | 6.36  | 1 | 1 | 1 | 2  | 1.01 | 1.21 | 1.06 | 1.29 |      |      |      |      |  |  | 173  | 18.8  | 6.68  |
| A6NJV1 | UPF0573 protein C2orf70 OS=Homo sapiens GN=C2orf70 PE=2 SV=1 - [CB070_HUMAN]                   | 15.42 | 1 | 2 | 2 | 6  | 0.95 | 0.87 | 0.88 | 0.86 | 1.06 | 1.27 | 1.23 | 1.48 |  |  | 201  | 23.4  | 9.99  |
| A8MWY0 | UPF0577 protein KIAA1324-like OS=Homo sapiens GN=KIAA1324L PE=2 SV=2 - [K132L_HUMAN]           | 2.92  | 1 | 1 | 1 | 1  | 1.00 | 0.68 | 1.03 | 0.70 |      |      |      |      |  |  | 1029 | 113.8 | 6.07  |
| Q96S19 | UPF0585 protein C16orf13 OS=Homo sapiens GN=C16orf13 PE=1 SV=2 - [CP013_HUMAN]                 | 4.41  | 1 | 1 | 1 | 2  | 1.11 | 1.07 | 1.12 | 1.09 |      |      |      |      |  |  | 204  | 22.6  | 7.83  |
| Q6NVV7 | UPF0595 protein C22orf40 OS=Homo sapiens GN=C22orf40 PE=2 SV=1 - [CV040_HUMAN]                 | 8.13  | 1 | 2 | 2 | 2  |      |      |      |      | 0.59 | 0.86 | 0.69 | 1.00 |  |  | 123  | 13.9  | 8.00  |
| A7E2U8 | UPF0602 protein C4orf47 OS=Homo sapiens GN=C4orf47 PE=2 SV=1 - [CD047_HUMAN]                   | 4.21  | 1 | 1 | 1 | 1  | 0.80 | 0.96 | 0.82 | 0.98 |      |      |      |      |  |  | 309  | 34.4  | 9.64  |
| Q9HCM3 | UPF0606 protein KIAA1549 OS=Homo sapiens GN=KIAA1549 PE=1 SV=4 - [K1549_HUMAN]                 | 3.28  | 1 | 2 | 2 | 8  | 0.78 | 0.58 | 0.72 | 0.65 | 0.76 | 0.86 | 0.74 | 0.84 |  |  | 1950 | 210.6 | 6.11  |
| Q9NWX4 | UPF0609 protein C4orf27 OS=Homo sapiens GN=C4orf27 PE=1 SV=2 - [CD027_HUMAN]                   | 2.89  | 1 | 1 | 1 | 3  | 0.76 | 0.84 | 0.87 | 0.97 | 1.05 | 0.77 | 0.85 | 0.62 |  |  | 346  | 39.4  | 6.80  |
| Q9H7Z3 | UPF0614 protein C14orf102 OS=Homo sapiens GN=C14orf102 PE=1 SV=3 - [CN102_HUMAN]               | 1.98  | 1 | 2 | 2 | 3  |      |      |      |      | 0.94 | 1.03 | 0.99 | 1.08 |  |  | 1164 | 132.6 | 7.68  |
| Q6IQ49 | UPF0667 protein C1orf55 OS=Homo sapiens GN=C1orf55 PE=1 SV=1 - [CA055_HUMAN]                   | 3.33  | 1 | 1 | 1 | 2  | 0.94 | 0.95 | 0.95 | 0.97 |      |      |      |      |  |  | 451  | 49.7  | 6.05  |
| Q9NX78 | UPF0679 protein C14orf101 OS=Homo sapiens GN=C14orf101 PE=1 SV=3 - [CN101_HUMAN]               | 2.69  | 1 | 1 | 1 | 1  |      |      |      |      | 0.87 | 0.87 | 0.94 | 0.94 |  |  | 707  | 79.5  | 8.40  |
| Q8N6I4 | UPF0694 transmembrane protein C14orf109 OS=Homo sapiens GN=C14orf109 PE=2 SV=4 - [CN109_HUMAN] | 3.68  | 1 | 1 | 1 | 1  |      |      |      |      | 1.42 | 1.23 | 1.14 | 0.99 |  |  | 163  | 18.7  | 8.19  |
| Q9H3H3 | UPF0696 protein C11orf68 OS=Homo sapiens GN=C11orf68 PE=1 SV=2 - [CK068_HUMAN]                 | 5.58  | 1 | 2 | 2 | 19 | #### | 5.32 | 1.01 | 0.40 | 0.82 | 0.78 | 0.85 | 0.84 |  |  | 251  | 27.3  | 5.45  |
| Q6UW78 | UPF0723 protein C11orf83 OS=Homo sapiens GN=C11orf83 PE=1 SV=2 - [CK083_HUMAN]                 | 16.13 | 1 | 1 | 1 | 1  |      |      |      |      | 0.39 |      | 0.95 |      |  |  | 93   | 10.1  | 9.41  |
| Q6UX73 | UPF0764 protein C16orf89 OS=Homo sapiens GN=C16orf89 PE=2 SV=2 - [CP089_HUMAN]                 | 9.95  | 1 | 2 | 2 | 3  | 1.08 | 1.14 | 1.20 | 1.27 |      |      |      |      |  |  | 402  | 45.4  | 6.19  |
| Q15849 | Urea transporter 2 OS=Homo sapiens GN=SLC14A2 PE=1 SV=3 - [UT2_HUMAN]                          | 0.65  | 1 | 1 | 1 | 2  | 2.04 | 2.16 | 1.88 | 2.02 | 2.31 | 2.67 | 2.01 | 2.33 |  |  | 920  | 101.1 | 6.95  |
| Q16831 | Uridine phosphorylase 1 OS=Homo sapiens GN=UPP1 PE=1 SV=1 - [JPP1_HUMAN]                       | 3.87  | 1 | 1 | 1 | 1  | 1.05 | 1.14 | 1.06 | 1.15 |      |      |      |      |  |  | 310  | 33.9  | 7.88  |
| P07911 | Uromodulin OS=Homo sapiens GN=UMOD PE=1 SV=1 - [JROM_HUMAN]                                    | 1.41  | 1 | 1 | 1 | 2  | 1.01 | 0.92 | 1.06 | 0.97 |      |      |      |      |  |  | 640  | 69.7  | 5.24  |
| O00526 | Uroplakin-2 OS=Homo sapiens GN=UPK2 PE=2 SV=2 - [UPK2_HUMAN]                                   | 8.70  | 1 | 1 | 1 | 1  | 4.75 | 2.87 | 0.96 | 0.58 |      |      |      |      |  |  | 184  | 19.4  | 10.40 |
| O75631 | Uroplakin-3a OS=Homo sapiens GN=UPK3A PE=1 SV=3 - [UPK3A_HUMAN]                                | 4.88  | 1 | 1 | 1 | 2  | 0.77 | 0.53 | 0.68 | 0.47 |      |      |      |      |  |  | 287  | 30.7  | 4.83  |
| B0FP48 | Uroplakin-3b-like protein OS=Homo sapiens GN=UPK3BL PE=2 SV=1 - [UPK3L_HUMAN]                  | 10.65 | 1 | 2 | 2 | 2  | 0.80 | 0.78 | 0.93 | 0.91 | 1.04 | 2.45 | 1.02 | 2.39 |  |  | 263  | 28.4  | 8.21  |
| O75445 | Usherin OS=Homo sapiens GN=USH2A PE=1 SV=3 - [USH2A_HUMAN]                                     | 0.83  | 1 | 1 | 2 | 2  |      |      |      |      | 0.93 | 1.03 | 1.16 | 1.29 |  |  | 5202 | 575.2 | 6.83  |
| Q92738 | USP6 N-terminal-like protein OS=Homo sapiens GN=USP6NL PE=1 SV=3 - [US6NL_HUMAN]               | 1.33  | 1 | 1 | 1 | 1  | 1.05 | 1.08 | 1.26 | 1.29 |      |      |      |      |  |  | 828  | 94.0  | 9.07  |
| P11684 | Uteroglobin OS=Homo sapiens GN=SCGB1A1 PE=1 SV=1 - [UTER_HUMAN]                                | 12.09 | 1 | 1 | 1 | 2  |      |      |      |      | 2.14 | 1.96 | 2.01 | 1.85 |  |  | 91   | 10.0  | 5.06  |
| Q16851 | UTP--glucose-1-phosphate uridylyltransferase OS=Homo sapiens GN=UGP2 PE=1 SV=5 - [UGPA_HUMAN]  | 1.38  | 1 | 1 | 1 | 2  | 0.62 | 0.58 | 0.56 | 0.53 |      |      |      |      |  |  | 508  | 56.9  | 8.15  |

|        |                                                                                                                 |       |   |    |    |    |      |      |      |      |      |      |       |      |      |       |      |
|--------|-----------------------------------------------------------------------------------------------------------------|-------|---|----|----|----|------|------|------|------|------|------|-------|------|------|-------|------|
| P46939 | Utrophin OS=Homo sapiens GN=UTRN PE=1 SV=2 - [UTRO_HUMAN]                                                       | 0.84  | 1 | 2  | 3  | 3  | 1.13 | 1.04 | 0.90 | 0.84 |      | 3433 | 394.2 | 5.33 |      |       |      |
| P54727 | UV excision repair protein RAD23 homolog B OS=Homo sapiens GN=RAD23B PE=1 SV=1 - [RD23B_HUMAN]                  | 21.03 | 2 | 7  | 7  | 17 |      |      |      |      | 1.45 | 1.34 | 1.35  | 1.28 | 409  | 43.1  | 4.84 |
| Q86XK7 | V-set and immunoglobulin domain-containing protein 1 OS=Homo sapiens GN=VSIG1 PE=1 SV=1 - [VSIG1_HUMAN]         | 3.10  | 1 | 1  | 1  | 2  |      |      |      |      | 1.06 | 0.42 | 0.97  | 0.38 | 387  | 41.8  | 4.65 |
| Q86VR7 | V-set and immunoglobulin domain-containing protein 10-like OS=Homo sapiens GN=VSIG10L PE=2 SV=2 - [VS10L_HUMAN] | 2.19  | 1 | 1  | 1  | 1  | 1.25 | 1.27 | 1.33 | 1.36 |      |      |       |      | 867  | 91.6  | 7.78 |
| Q5VU13 | V-set and immunoglobulin domain-containing protein 8 OS=Homo sapiens GN=VSIG8 PE=1 SV=1 - [VSIG8_HUMAN]         | 5.80  | 1 | 1  | 1  | 2  | 1.41 | 1.35 | 1.32 | 1.27 |      |      |       |      | 414  | 43.9  | 7.20 |
| Q8TAG5 | V-set and transmembrane domain-containing protein 2A OS=Homo sapiens GN=VSTM2A PE=2 SV=3 - [VTM2A_HUMAN]        | 7.20  | 1 | 1  | 1  | 1  |      |      |      |      | 0.82 | 0.94 | 0.75  | 0.86 | 236  | 25.8  | 8.27 |
| Q8IW00 | V-set and transmembrane domain-containing protein 4 OS=Homo sapiens GN=VSTM4 PE=2 SV=3 - [VSTM4_HUMAN]          | 4.38  | 1 | 1  | 1  | 1  | 0.68 | 0.72 | 0.49 | 0.52 |      |      |       |      | 320  | 36.1  | 9.86 |
| P38606 | V-type proton ATPase catalytic subunit A OS=Homo sapiens GN=ATP6V1A PE=1 SV=2 - [VATA_HUMAN]                    | 4.38  | 1 | 2  | 2  | 6  | 0.57 | 0.61 | 0.58 | 0.63 | 1.06 | 1.01 | 0.70  | 0.67 | 617  | 68.3  | 5.52 |
| P21281 | V-type proton ATPase subunit B, brain isoform OS=Homo sapiens GN=ATP6V1B2 PE=1 SV=3 - [VATB2_HUMAN]             | 2.94  | 1 | 1  | 1  | 3  | 1.22 | 1.33 | 1.25 | 1.34 |      |      |       |      | 511  | 56.5  | 5.81 |
| P86790 | Vacuolar fusion protein CCZ1 homolog B OS=Homo sapiens GN=CCZ1B PE=1 SV=1 - [CCZ1B_HUMAN]                       | 4.77  | 1 | 1  | 1  | 4  |      |      |      |      | 0.99 | 0.94 | 0.88  | 0.84 | 482  | 55.8  | 6.48 |
| Q9H270 | Vacuolar protein sorting-associated protein 11 homolog OS=Homo sapiens GN=VPS11 PE=1 SV=1 - [VPS11_HUMAN]       | 1.17  | 1 | 1  | 1  | 1  | 0.90 | 0.94 | 1.07 | 1.12 |      |      |       |      | 941  | 107.8 | 7.05 |
| Q96RL7 | Vacuolar protein sorting-associated protein 13A OS=Homo sapiens GN=VPS13A PE=1 SV=2 - [VP13A_HUMAN]             | 1.45  | 1 | 3  | 3  | 7  | 0.83 | 1.12 | 0.81 | 1.11 | 1.21 | 1.06 | 0.92  | 1.16 | 3174 | 360.0 | 6.33 |
| Q5THJ4 | Vacuolar protein sorting-associated protein 13D OS=Homo sapiens GN=VPS13D PE=1 SV=1 - [VP13D_HUMAN]             | 1.32  | 2 | 4  | 4  | 4  |      |      |      |      | 0.97 | 1.00 | 1.06  | 1.09 | 4387 | 491.5 | 6.58 |
| Q8NEZ2 | Vacuolar protein sorting-associated protein 37A OS=Homo sapiens GN=VPS37A PE=1 SV=1 - [VP37A_HUMAN]             | 3.27  | 1 | 1  | 1  | 1  |      |      |      |      | 1.06 | 1.05 | 1.10  | 1.10 | 397  | 44.3  | 5.57 |
| Q9NRW7 | Vacuolar protein sorting-associated protein 45 OS=Homo sapiens GN=VPS45 PE=1 SV=1 - [VPS45_HUMAN]               | 4.91  | 1 | 1  | 1  | 1  | 0.97 | 1.16 | 0.87 | 1.04 |      |      |       |      | 570  | 65.0  | 8.24 |
| O75351 | Vacuolar protein sorting-associated protein 4B OS=Homo sapiens GN=VPS4B PE=1 SV=2 - [VPS4B_HUMAN]               | 7.88  | 1 | 1  | 1  | 1  | 1.71 | 1.08 | 2.40 | 1.53 |      |      |       |      | 444  | 49.3  | 7.23 |
| Q8N1B4 | Vacuolar protein sorting-associated protein 52 homolog OS=Homo sapiens GN=VPS52 PE=1 SV=1 - [VPS52_HUMAN]       | 2.07  | 1 | 1  | 2  | 2  | 0.97 | 1.09 | 1.13 | 1.27 |      |      |       |      | 723  | 82.2  | 5.99 |
| Q5ST30 | Valine--tRNA ligase, mitochondrial OS=Homo sapiens GN=VARS2 PE=1 SV=2 - [SYVM_HUMAN]                            | 1.60  | 1 | 1  | 1  | 1  | 0.62 |      | 0.66 |      |      |      |       |      | 1063 | 118.4 | 7.02 |
| Q96JC1 | Vam6/Vps39-like protein OS=Homo sapiens GN=VPS39 PE=1 SV=2 - [VPS39_HUMAN]                                      | 3.50  | 2 | 2  | 3  | 9  |      |      |      |      | 0.66 | 0.71 | 0.65  | 0.63 | 886  | 101.7 | 6.99 |
| Q9ULK5 | Vang-like protein 2 OS=Homo sapiens GN=VANGL2 PE=1 SV=2 - [VANG2_HUMAN]                                         | 4.03  | 2 | 2  | 2  | 2  |      |      |      |      | 1.40 | 1.30 | 1.37  | 1.27 | 521  | 59.7  | 9.22 |
| P19320 | Vascular cell adhesion protein 1 OS=Homo sapiens GN=VCAM1 PE=1 SV=1 - [VCAM1_HUMAN]                             | 31.12 | 1 | 19 | 20 | 94 | 1.05 | 1.04 | 1.09 | 1.00 | 1.05 | 1.01 | 1.09  | 1.06 | 739  | 81.2  | 5.22 |
| P17948 | Vascular endothelial growth factor receptor 1 OS=Homo sapiens GN=FLT1 PE=1 SV=2 - [VGFR1_HUMAN]                 | 2.91  | 1 | 2  | 2  | 2  | 0.92 | 1.03 | 0.87 | 0.99 | 0.80 | 0.84 | 0.90  | 0.94 | 1338 | 150.7 | 8.38 |
| P35968 | Vascular endothelial growth factor receptor 2 OS=Homo sapiens GN=KDR PE=1 SV=2 - [VGFR2_HUMAN]                  | 1.40  | 1 | 1  | 1  | 2  |      |      |      |      | 0.43 | 0.20 | 0.59  | 0.27 | 1356 | 151.4 | 5.85 |
| P35916 | Vascular endothelial growth factor receptor 3 OS=Homo sapiens GN=FLT4 PE=1 SV=3 - [VGFR3_HUMAN]                 | 11.15 | 1 | 8  | 8  | 13 | 0.86 | 0.72 | 0.96 | 0.79 | 1.20 | 1.17 | 1.09  | 1.11 | 1363 | 152.7 | 6.30 |
| Q86WP2 | Vasculin OS=Homo sapiens GN=GPBP1 PE=1 SV=1 - [GPBP1_HUMAN]                                                     | 4.65  | 1 | 1  | 1  | 1  |      |      |      |      | 0.73 |      |       |      | 473  | 53.3  | 7.05 |
| Q9HC44 | Vasculin-like protein 1 OS=Homo sapiens GN=GPBP1L1 PE=1 SV=1 - [GPBL1_HUMAN]                                    | 5.91  | 1 | 1  | 1  | 1  |      |      |      |      | 1.23 | 1.16 | 1.16  | 1.09 | 474  | 52.3  | 6.84 |
| P50552 | Vasodilator-stimulated phosphoprotein OS=Homo sapiens GN=VASP PE=1 SV=3 - [VASP_HUMAN]                          | 36.32 | 1 | 14 | 14 | 85 | 0.79 | 0.73 | 0.77 | 0.71 | 1.44 | 1.25 | 1.21  | 1.19 | 380  | 39.8  | 8.94 |

|        |                                                                                                                   |       |   |    |    |      |      |      |      |      |      |      |      |      |      |       |       |
|--------|-------------------------------------------------------------------------------------------------------------------|-------|---|----|----|------|------|------|------|------|------|------|------|------|------|-------|-------|
| Q7L8A9 | Vasohibin-1 OS=Homo sapiens GN=VASH1 PE=1 SV=1 - [VASH1_HUMAN]                                                    | 4.93  | 1 | 2  | 2  | 2    | 0.81 | 1.26 | 0.72 | 1.13 | 1.03 | 0.73 | 1.22 | 0.86 | 365  | 40.9  | 9.48  |
| Q86V25 | Vasohibin-2 OS=Homo sapiens GN=VASH2 PE=2 SV=2 - [VASH2_HUMAN]                                                    | 3.38  | 1 | 1  | 1  | 11   | 0.75 | 0.74 | 0.77 | 0.75 | 0.84 | 0.87 | 0.79 | 0.82 | 355  | 40.4  | 10.01 |
| Q6EMK4 | Vasorin OS=Homo sapiens GN=VASN PE=1 SV=1 - [VASN_HUMAN]                                                          | 14.86 | 7 | 6  | 7  | 37   | 1.37 | 1.32 | 1.45 | 1.42 | 0.91 | 0.85 | 0.96 | 0.91 | 673  | 71.7  | 7.39  |
| Q6UXB2 | VEGF co-regulated chemokine 1 OS=Homo sapiens GN=CXCL17 PE=1 SV=1 - [VCC1_HUMAN]                                  | 15.13 | 1 | 2  | 2  | 2    | 0.64 | 0.72 | 0.62 | 0.70 |      |      |      |      | 119  | 13.8  | 10.96 |
| P13611 | Versican core protein OS=Homo sapiens GN=VCAN PE=1 SV=3 - [CSPG2_HUMAN]                                           | 1.33  | 1 | 2  | 2  | 2    | 1.07 | 0.68 | 0.96 | 0.59 |      |      |      |      | 3396 | 372.6 | 4.51  |
| Q9H8Y1 | Vertnin OS=Homo sapiens GN=VRTN PE=2 SV=1 - [VRTN_HUMAN]                                                          | 1.57  | 1 | 1  | 1  | 1    | 0.88 | 0.94 | 0.89 | 0.97 |      |      |      |      | 702  | 78.2  | 9.01  |
| Q6ZVE7 | Vesicle transport protein GOT1A OS=Homo sapiens GN=GOLT1A PE=2 SV=1 - [GOT1A_HUMAN]                               | 6.82  | 1 | 2  | 2  | 2    |      |      |      |      | 1.50 | 1.07 | 1.14 | 0.81 | 132  | 14.9  | 10.37 |
| Q9Y3E0 | Vesicle transport protein GOT1B OS=Homo sapiens GN=GOLT1B PE=1 SV=1 - [GOT1B_HUMAN]                               | 5.80  | 1 | 1  | 1  | 2    |      |      |      |      | 0.61 | 0.56 | 0.85 | 0.78 | 138  | 15.4  | 10.36 |
| Q12981 | Vesicle transport protein SEC20 OS=Homo sapiens GN=BNIP1 PE=1 SV=3 - [SEC20_HUMAN]                                | 2.63  | 1 | 1  | 1  | 1    | 0.82 | 0.77 | 0.72 | 0.68 |      |      |      |      | 228  | 26.1  | 8.95  |
| Q9UEU0 | Vesicle transport through interaction with t-SNAREs homolog 1B OS=Homo sapiens GN=VTI1B PE=1 SV=3 - [VTI1B_HUMAN] | 12.07 | 1 | 1  | 1  | 1    | 0.32 | 0.26 | 0.45 | 0.37 |      |      |      |      | 232  | 26.7  | 9.04  |
| P51809 | Vesicle-associated membrane protein 7 OS=Homo sapiens GN=VAMP7 PE=1 SV=3 - [VAMP7_HUMAN]                          | 7.73  | 1 | 2  | 2  | 5    |      |      |      |      | 1.02 | 1.11 | 1.10 | 1.19 | 220  | 24.9  | 8.60  |
| Q9BV40 | Vesicle-associated membrane protein 8 OS=Homo sapiens GN=VAMP8 PE=1 SV=1 - [VAMP8_HUMAN]                          | 10.00 | 1 | 1  | 1  | 2    |      |      |      |      | 2.38 | 2.47 | 2.15 | 2.22 | 100  | 11.4  | 7.34  |
| Q9P0L0 | Vesicle-associated membrane protein-associated protein A OS=Homo sapiens GN=VAPA PE=1 SV=3 - [VAPA_HUMAN]         | 4.42  | 1 | 1  | 1  | 2    |      |      |      |      | 1.50 | 1.48 | 1.35 | 1.33 | 249  | 27.9  | 8.62  |
| P46459 | Vesicle-fusing ATPase OS=Homo sapiens GN=NSF PE=1 SV=3 - [NSF_HUMAN]                                              | 2.02  | 1 | 1  | 1  | 5    | 1.06 | 1.34 | 1.15 | 1.20 |      |      |      |      | 744  | 82.5  | 6.95  |
| O75396 | Vesicle-trafficking protein SEC22b OS=Homo sapiens GN=SEC22B PE=1 SV=4 - [SEC22B_HUMAN]                           | 4.65  | 1 | 1  | 1  | 1    |      |      |      |      | 0.72 | 0.83 | 0.69 | 0.80 | 215  | 24.6  | 6.92  |
| Q9BRL7 | Vesicle-trafficking protein SEC22c OS=Homo sapiens GN=SEC22C PE=2 SV=1 - [SEC22C_HUMAN]                           | 13.20 | 1 | 2  | 2  | 2    |      |      |      |      | 1.07 | 1.11 | 0.97 | 1.00 | 303  | 34.2  | 6.35  |
| Q12907 | Vesicular integral-membrane protein VIP36 OS=Homo sapiens GN=LMAN2 PE=1 SV=1 - [LMAN2_HUMAN]                      | 6.74  | 1 | 2  | 2  | 6    | 1.05 | 1.13 | 0.98 | 1.06 | 1.04 | 1.01 | 1.23 | 1.19 | 356  | 40.2  | 6.95  |
| Q00341 | Vigilin OS=Homo sapiens GN=HDLBP PE=1 SV=2 - [VIGLN_HUMAN]                                                        | 2.76  | 1 | 2  | 3  | 5    | 0.90 | 0.83 | 1.18 | 1.10 | 1.13 | 1.06 | 1.27 | 1.19 | 1268 | 141.4 | 6.87  |
| O15195 | Villin-like protein OS=Homo sapiens GN=VILL PE=2 SV=3 - [VILL_HUMAN]                                              | 0.82  | 1 | 1  | 1  | 1    | 1.11 | 1.24 | 1.10 | 1.24 |      |      |      |      | 856  | 95.8  | 7.02  |
| P18206 | Vinculin OS=Homo sapiens GN=VCL PE=1 SV=4 - [VINC_HUMAN]                                                          | 43.12 | 1 | 39 | 39 | 122  | 0.59 | 0.59 | 0.58 | 0.57 | 0.89 | 0.93 | 0.82 | 0.86 | 1134 | 123.7 | 5.66  |
| Q9H0V9 | VIP36-like protein OS=Homo sapiens GN=LMAN2L PE=1 SV=1 - [LMA2L_HUMAN]                                            | 4.60  | 1 | 1  | 1  | 1    | 1.03 | 0.60 | 1.42 | 0.82 |      |      |      |      | 348  | 39.7  | 8.38  |
| P02774 | Vitamin D-binding protein OS=Homo sapiens GN=GC PE=1 SV=1 - [VTDB_HUMAN]                                          | 80.59 | 1 | 37 | 40 | 1692 | 1.03 | 0.98 | 1.04 | 0.98 | 1.06 | 1.06 | 1.01 | 1.07 | 474  | 52.9  | 5.54  |
| P04070 | Vitamin K-dependent protein C OS=Homo sapiens GN=PROC PE=1 SV=1 - [PROC_HUMAN]                                    | 26.68 | 1 | 9  | 9  | 81   | 1.24 | 1.16 | 1.26 | 1.16 | 0.90 | 0.88 | 0.94 | 0.89 | 461  | 52.0  | 6.28  |
| P07225 | Vitamin K-dependent protein S OS=Homo sapiens GN=PROS1 PE=1 SV=1 - [PROS_HUMAN]                                   | 53.25 | 2 | 32 | 32 | 401  | 1.05 | 1.04 | 1.06 | 1.05 | 0.82 | 0.82 | 0.82 | 0.81 | 676  | 75.1  | 5.67  |
| P22891 | Vitamin K-dependent protein Z OS=Homo sapiens GN=PROZ PE=1 SV=2 - [PROZ_HUMAN]                                    | 39.75 | 1 | 14 | 14 | 67   | 1.22 | 1.31 | 1.22 | 1.33 | 0.87 | 0.90 | 0.89 | 0.92 | 400  | 44.7  | 5.97  |
| Q6UXI7 | Vitrin OS=Homo sapiens GN=VIT PE=2 SV=1 - [VITRN_HUMAN]                                                           | 1.62  | 1 | 1  | 1  | 1    |      |      |      |      | 1.74 | 1.99 | 1.53 | 1.75 | 678  | 73.9  | 9.20  |
| P04004 | Vitronectin OS=Homo sapiens GN=VTN PE=1 SV=1 - [VTNC_HUMAN]                                                       | 41.84 | 1 | 22 | 22 | 1057 | 1.11 | 1.12 | 1.11 | 1.10 | 1.09 | 1.12 | 1.10 | 1.13 | 478  | 54.3  | 5.80  |

|        |                                                                                                                        |       |   |    |    |     |      |      |      |      |      |      |      |      |      |       |       |      |      |
|--------|------------------------------------------------------------------------------------------------------------------------|-------|---|----|----|-----|------|------|------|------|------|------|------|------|------|-------|-------|------|------|
| P45880 | Voltage-dependent anion-selective channel protein 2<br>OS=Homo sapiens GN=VDAC2 PE=1 SV=2 -<br>[VDAC2_HUMAN]           | 4.08  | 1 | 1  | 1  | 1   | 1.01 | 1.04 | 1.20 | 1.24 |      |      |      |      |      |       | 294   | 31.5 | 7.56 |
| Q9UBN1 | Voltage-dependent calcium channel gamma-4 subunit<br>OS=Homo sapiens GN=CACNG4 PE=2 SV=1 -<br>[CCG4_HUMAN]             | 4.59  | 1 | 1  | 1  | 1   |      |      |      |      | 0.10 | 0.54 | 0.11 | 0.59 | 327  | 36.6  | 9.10  |      |      |
| Q9BXT2 | Voltage-dependent calcium channel gamma-6 subunit<br>OS=Homo sapiens GN=CACNG6 PE=2 SV=1 -<br>[CCG6_HUMAN]             | 2.31  | 1 | 1  | 1  | 1   |      |      |      |      | 1.00 | 1.15 | 1.18 | 1.35 | 260  | 28.1  | 9.17  |      |      |
| P54289 | Voltage-dependent calcium channel subunit alpha-2/delta-1<br>OS=Homo sapiens GN=CACNA2D1 PE=1 SV=3 -<br>[CA2D1_HUMAN]  | 5.71  | 1 | 4  | 4  | 9   | 1.22 | 1.12 | 1.11 | 1.03 | 1.10 | 0.84 | 1.12 | 0.81 | 1103 | 124.5 | 5.27  |      |      |
| Q7Z3S7 | Voltage-dependent calcium channel subunit alpha-2/delta-4<br>OS=Homo sapiens GN=CACNA2D4 PE=1 SV=2 -<br>[CA2D4_HUMAN]  | 2.37  | 1 | 2  | 2  | 5   | 1.83 | 1.51 | 1.75 | 1.45 |      |      |      |      | 1137 | 127.9 | 5.35  |      |      |
| Q13936 | Voltage-dependent L-type calcium channel subunit alpha-1C<br>OS=Homo sapiens GN=CACNA1C PE=1 SV=4 -<br>[CAC1C_HUMAN]   | 0.81  | 1 | 1  | 2  | 4   | 0.78 | 0.76 | 0.78 | 0.75 | 0.93 | 0.96 | 0.79 | 0.82 | 2221 | 248.8 | 6.76  |      |      |
| O00555 | Voltage-dependent P/Q-type calcium channel subunit alpha-1A<br>OS=Homo sapiens GN=CACNA1A PE=1 SV=2 -<br>[CAC1A_HUMAN] | 1.92  | 1 | 2  | 2  | 2   | 1.67 | 0.68 |      |      | 1.27 | 0.76 | 0.87 | 0.52 | 2505 | 282.2 | 8.84  |      |      |
| Q5GFL6 | von Willebrand factor A domain-containing protein 2 OS=Homo sapiens GN=VWA2 PE=1 SV=1 - [VWA2_HUMAN]                   | 1.72  | 1 | 1  | 1  | 1   | 0.77 | 1.07 | 0.69 | 0.96 |      |      |      |      | 755  | 82.0  | 8.02  |      |      |
| A6NC14 | von Willebrand factor A domain-containing protein 3A<br>OS=Homo sapiens GN=VWA3A PE=2 SV=3 -<br>[VWA3A_HUMAN]          | 0.84  | 1 | 1  | 1  | 3   | 0.46 | 0.49 | 0.50 | 0.54 | 0.80 | 0.89 | 0.70 | 0.79 | 1184 | 133.9 | 8.46  |      |      |
| Q502W6 | von Willebrand factor A domain-containing protein 3B<br>OS=Homo sapiens GN=VWA3B PE=2 SV=3 -<br>[VWA3B_HUMAN]          | 1.08  | 1 | 1  | 1  | 1   | 1.57 | 1.40 | 1.98 | 1.77 |      |      |      |      | 1294 | 145.7 | 7.33  |      |      |
| O00534 | von Willebrand factor A domain-containing protein 5A<br>OS=Homo sapiens GN=VWA5A PE=2 SV=2 -<br>[VWA5A_HUMAN]          | 1.78  | 1 | 1  | 1  | 1   | 1.00 | 1.30 | 1.05 | 1.36 |      |      |      |      | 786  | 86.4  | 6.58  |      |      |
| Q5TIE3 | von Willebrand factor A domain-containing protein 5B1<br>OS=Homo sapiens GN=VWA5B1 PE=1 SV=2 -<br>[VWA5B1_HUMAN]       | 2.70  | 1 | 2  | 2  | 3   | 1.09 | 0.88 | 1.30 | 1.05 | 1.40 | 1.54 | 1.24 | 1.37 | 1220 | 133.7 | 8.15  |      |      |
| Q8N398 | von Willebrand factor A domain-containing protein 5B2<br>OS=Homo sapiens GN=VWA5B2 PE=2 SV=2 -<br>[VWA5B2_HUMAN]       | 1.84  | 1 | 1  | 1  | 1   |      |      |      |      | 0.70 | 0.74 | 0.67 | 0.71 | 1253 | 132.7 | 6.46  |      |      |
| B2RUY7 | von Willebrand factor C domain-containing protein 2-like<br>OS=Homo sapiens GN=VWC2L PE=2 SV=1 -<br>[VWC2L_HUMAN]      | 4.05  | 1 | 1  | 1  | 2   |      |      |      |      | 0.58 | 0.35 | 0.96 | 0.58 | 222  | 24.6  | 5.20  |      |      |
| P04275 | von Willebrand factor OS=Homo sapiens GN=VWF PE=1 SV=4 - [VWF_HUMAN]                                                   | 39.03 | 1 | 87 | 87 | 421 | 1.16 | 1.19 | 1.14 | 1.18 | 0.87 | 0.75 | 0.89 | 0.76 | 2813 | 309.1 | 5.48  |      |      |
| Q9UPU3 | VPS10 domain-containing receptor SorCS3 OS=Homo sapiens GN=SORCS3 PE=2 SV=2 - [SORCS3_HUMAN]                           | 1.39  | 1 | 1  | 1  | 1   | 1.32 | 1.45 | 1.46 | 1.62 |      |      |      |      | 1222 | 135.7 | 6.60  |      |      |
| O43516 | WAS/WASL-interacting protein family member 1 OS=Homo sapiens GN=WIPF1 PE=1 SV=3 - [WIPF1_HUMAN]                        | 6.36  | 1 | 3  | 3  | 7   |      |      |      |      | 1.50 | 1.42 | 1.33 | 1.26 | 503  | 51.2  | 11.47 |      |      |
| A6NGB9 | WAS/WASL-interacting protein family member 3 OS=Homo sapiens GN=WIPF3 PE=2 SV=3 - [WIPF3_HUMAN]                        | 4.97  | 1 | 1  | 1  | 1   | 1.03 | 0.91 | 1.33 | 1.18 |      |      |      |      | 483  | 49.3  | 9.99  |      |      |
| O75717 | WD repeat and HMG-box DNA-binding protein 1 OS=Homo sapiens GN=WDHD1 PE=1 SV=1 - [WDHD1_HUMAN]                         | 2.13  | 1 | 1  | 2  | 2   |      |      |      |      | 0.60 | 0.52 | 0.84 | 0.72 | 1129 | 125.9 | 5.62  |      |      |
| Q9BRX9 | WD repeat domain-containing protein 83 OS=Homo sapiens GN=WDR83 PE=1 SV=1 - [WDR83_HUMAN]                              | 4.76  | 1 | 1  | 1  | 1   |      |      |      |      | 0.97 | 1.21 | 1.08 | 1.35 | 315  | 34.3  | 5.58  |      |      |
| Q6ZS81 | WD repeat- and FYVE domain-containing protein 4 OS=Homo sapiens GN=WDFY4 PE=1 SV=3 - [WDFY4_HUMAN]                     | 0.91  | 1 | 1  | 1  | 1   |      |      |      |      | 1.61 | 1.17 | 1.44 | 1.05 | 3184 | 353.4 | 6.32  |      |      |
| O75083 | WD repeat-containing protein 1 OS=Homo sapiens GN=WDR1 PE=1 SV=4 - [WDR1_HUMAN]                                        | 1.32  | 1 | 1  | 1  | 2   | 0.45 | 0.42 | 0.45 | 0.42 |      |      |      |      | 606  | 66.2  | 6.65  |      |      |
| Q9BZH6 | WD repeat-containing protein 11 OS=Homo sapiens GN=WDR11 PE=1 SV=1 - [WDR11_HUMAN]                                     | 0.98  | 1 | 1  | 1  | 4   | 0.55 | 0.58 | 0.51 | 0.53 | 1.29 | 0.94 | 0.88 | 0.64 | 1224 | 136.6 | 6.92  |      |      |
| Q8NEZ3 | WD repeat-containing protein 19 OS=Homo sapiens GN=WDR19 PE=1 SV=2 - [WDR19_HUMAN]                                     | 0.37  | 1 | 1  | 1  | 2   | 1.13 | 1.00 | 0.99 | 0.80 |      |      |      |      | 1342 | 151.5 | 6.35  |      |      |
| Q8TBZ3 | WD repeat-containing protein 20 OS=Homo sapiens GN=WDR20 PE=1 SV=2 - [WDR20_HUMAN]                                     | 2.11  | 1 | 1  | 1  | 2   | 1.47 | 1.22 | 1.48 | 1.22 | 0.68 | 0.85 | 0.84 | 1.06 | 569  | 62.9  | 8.00  |      |      |
| Q9P2L0 | WD repeat-containing protein 35 OS=Homo sapiens GN=WDR35 PE=1 SV=3 - [WDR35_HUMAN]                                     | 0.68  | 1 | 1  | 1  | 1   | 1.08 | 1.13 | 1.11 | 1.18 |      |      |      |      | 1181 | 133.5 | 6.38  |      |      |
| Q5JTN6 | WD repeat-containing protein 38 OS=Homo sapiens GN=WDR38 PE=2 SV=1 - [WDR38_HUMAN]                                     | 2.23  | 1 | 1  | 1  | 2   | 0.87 | 0.74 | 0.77 | 0.66 | 1.38 | 0.92 | 1.25 | 0.83 | 314  | 34.3  | 8.54  |      |      |

|        |                                                                                                                   |       |   |   |   |   |      |      |      |      |      |      |      |      |      |       |      |
|--------|-------------------------------------------------------------------------------------------------------------------|-------|---|---|---|---|------|------|------|------|------|------|------|------|------|-------|------|
| Q5JSH3 | WD repeat-containing protein 44 OS=Homo sapiens<br>GN=WDR44 PE=1 SV=1 - [WDR44_HUMAN]                             | 8.54  | 1 | 6 | 6 | 8 | 0.51 | 0.42 | 0.89 | 0.73 | 1.60 | 1.62 | 1.45 | 1.47 | 913  | 101.3 | 5.45 |
| O15213 | WD repeat-containing protein 46 OS=Homo sapiens<br>GN=WDR46 PE=1 SV=3 - [WDR46_HUMAN]                             | 0.98  | 1 | 1 | 1 | 1 |      |      |      |      | 1.50 | 2.49 | 1.33 | 2.22 | 610  | 68.0  | 9.67 |
| Q8IV35 | WD repeat-containing protein 49 OS=Homo sapiens<br>GN=WDR49 PE=1 SV=1 - [WDR49_HUMAN]                             | 1.15  | 1 | 1 | 1 | 1 |      |      |      |      | 1.08 | 1.20 | 1.22 | 1.35 | 697  | 79.2  | 8.47 |
| Q9H977 | WD repeat-containing protein 54 OS=Homo sapiens<br>GN=WDR54 PE=1 SV=1 - [WDR54_HUMAN]                             | 5.39  | 1 | 1 | 1 | 1 | 0.80 | 0.78 | 0.76 | 0.74 |      |      |      |      | 334  | 35.9  | 6.20 |
| Q86VZ2 | WD repeat-containing protein 5B OS=Homo sapiens<br>GN=WDR5B PE=2 SV=1 - [WDR5B_HUMAN]                             | 9.39  | 1 | 1 | 1 | 1 | 0.81 | 0.45 | 0.76 | 0.42 |      |      |      |      | 330  | 36.3  | 7.61 |
| Q9NNW5 | WD repeat-containing protein 6 OS=Homo sapiens<br>GN=WDR6 PE=1 SV=1 - [WDR6_HUMAN]                                | 2.14  | 1 | 1 | 1 | 1 | 0.87 | 0.74 | 0.92 | 0.79 |      |      |      |      | 1121 | 121.6 | 6.87 |
| O43379 | WD repeat-containing protein 62 OS=Homo sapiens<br>GN=WDR62 PE=1 SV=4 - [WDR62_HUMAN]                             | 0.99  | 1 | 1 | 1 | 1 | 1.72 | 0.88 | 1.73 | 0.89 |      |      |      |      | 1518 | 165.8 | 5.91 |
| Q96DN5 | WD repeat-containing protein 67 OS=Homo sapiens<br>GN=WDR67 PE=2 SV=2 - [WDR67_HUMAN]                             | 0.84  | 1 | 1 | 1 | 1 | 0.93 | 0.54 | 1.20 | 0.71 |      |      |      |      | 1066 | 124.1 | 8.62 |
| Q9Y4E6 | WD repeat-containing protein 7 OS=Homo sapiens<br>GN=WDR7 PE=2 SV=2 - [WDR7_HUMAN]                                | 1.07  | 1 | 2 | 2 | 3 | 0.77 | 0.87 | 0.77 | 0.87 | 0.56 | 0.04 | 0.80 | 0.06 | 1490 | 163.7 | 6.92 |
| Q5VTH9 | WD repeat-containing protein 78 OS=Homo sapiens<br>GN=WDR78 PE=2 SV=1 - [WDR78_HUMAN]                             | 1.53  | 1 | 1 | 1 | 1 | 0.52 | 0.18 | 0.76 | 0.26 |      |      |      |      | 848  | 94.5  | 5.76 |
| Q562E7 | WD repeat-containing protein 81 OS=Homo sapiens<br>GN=WDR81 PE=2 SV=1 - [WDR81_HUMAN]                             | 3.15  | 1 | 1 | 1 | 1 | 1.02 | 1.05 | 1.16 | 1.19 |      |      |      |      | 890  | 95.6  | 5.11 |
| Q6ZQ6  | WD repeat-containing protein 87 OS=Homo sapiens<br>GN=WDR87 PE=2 SV=3 - [WDR87_HUMAN]                             | 1.15  | 1 | 2 | 3 | 5 | 1.30 | 1.20 | 1.10 | 1.02 |      |      |      |      | 2873 | 333.0 | 7.28 |
| A4D1P6 | WD repeat-containing protein 91 OS=Homo sapiens<br>GN=WDR91 PE=1 SV=2 - [WDR91_HUMAN]                             | 1.61  | 1 | 1 | 1 | 1 | 1.26 | 1.51 | 1.19 | 1.46 |      |      |      |      | 747  | 83.3  | 6.58 |
| Q8NDM7 | WD repeat-containing protein 96 OS=Homo sapiens<br>GN=WDR96 PE=2 SV=3 - [WDR96_HUMAN]                             | 0.72  | 1 | 1 | 1 | 1 | 0.70 | 0.57 | 0.85 | 0.70 |      |      |      |      | 1665 | 191.9 | 5.99 |
| Q9P202 | Whirlin OS=Homo sapiens<br>GN=WHRN PE=1 SV=3 - [WHRN_HUMAN]                                                       | 1.65  | 1 | 1 | 2 | 4 |      |      |      |      | 1.21 | 1.16 | 1.20 | 1.14 | 907  | 96.5  | 8.75 |
| P19544 | Wilms tumor protein OS=Homo sapiens<br>GN=WT1 PE=1 SV=2 [WT1_HUMAN]                                               | 6.68  | 1 | 1 | 1 | 5 | 1.39 | 1.56 | 1.37 | 1.55 | 1.72 | 1.90 | 1.58 | 1.75 | 449  | 49.2  | 9.00 |
| Q7Z5K2 | Wings apart-like protein homolog OS=Homo sapiens<br>GN=WAPAL PE=1 SV=1 - [WAPAL_HUMAN]                            | 3.03  | 1 | 2 | 2 | 3 | 1.39 | 1.55 | 1.40 | 1.58 | 0.71 | 0.69 | 0.81 | 0.79 | 1190 | 132.9 | 5.44 |
| P42768 | Wiskott-Aldrich syndrome protein OS=Homo sapiens<br>GN=WAS PE=1 SV=4 - [WASP_HUMAN]                               | 4.18  | 1 | 1 | 1 | 3 |      |      |      |      | 0.62 | 0.92 | 1.11 | 1.64 | 502  | 52.9  | 6.64 |
| O76076 | WNT1-inducible-signaling pathway protein 2 OS=Homo sapiens<br>GN=WISP2 PE=1 SV=1 - [WISP2_HUMAN]                  | 10.40 | 1 | 2 | 2 | 3 |      |      |      |      | 0.90 | 0.68 | 1.20 | 0.90 | 250  | 26.8  | 7.88 |
| O76024 | Wolframin OS=Homo sapiens<br>GN=WFS1 PE=1 SV=2 - [WFS1_HUMAN]                                                     | 3.93  | 1 | 2 | 2 | 4 | 0.73 | 0.80 | 0.70 | 0.77 | 1.06 | 0.54 | 0.87 | 0.42 | 890  | 100.2 | 8.05 |
| Q969T9 | WW domain-binding protein 2 OS=Homo sapiens<br>GN=WBP2 PE=1 SV=1 - [WBP2_HUMAN]                                   | 9.58  | 1 | 2 | 2 | 7 | 0.82 | 0.84 | 0.92 | 0.92 | 1.18 | 1.13 | 1.26 | 1.21 | 261  | 28.1  | 5.91 |
| Q9GZV5 | WW domain-containing transcription regulator protein 1 OS=Homo sapiens<br>GN=WWTR1 PE=1 SV=1 - [WWTR1_HUMAN]      | 6.50  | 1 | 1 | 1 | 2 |      |      |      |      | 1.04 | 0.71 | 0.95 | 0.64 | 400  | 44.1  | 5.82 |
| P17861 | X-box-binding protein 1 OS=Homo sapiens<br>GN=XBP1 PE=1 SV=2 - [XBP1_HUMAN]                                       | 6.13  | 1 | 1 | 1 | 1 |      |      |      |      | 1.52 | 1.25 | 1.40 | 1.15 | 261  | 28.7  | 9.67 |
| Q9NP60 | X-linked interleukin-1 receptor accessory protein-like 2 OS=Homo sapiens<br>GN=IL1RAPL2 PE=2 SV=1 - [IRPL2_HUMAN] | 1.90  | 1 | 1 | 1 | 1 |      |      |      |      | 1.06 | 1.22 | 1.05 | 1.21 | 686  | 78.6  | 6.46 |
| Q92834 | X-linked retinitis pigmentosa GTPase regulator OS=Homo sapiens<br>GN=RPGR PE=1 SV=2 - [RPGR_HUMAN]                | 3.24  | 1 | 1 | 1 | 1 |      |      |      |      | 1.04 | 0.65 | 1.66 | 1.03 | 1020 | 113.3 | 4.86 |
| Q6P2D8 | X-ray radiation resistance-associated protein 1 OS=Homo sapiens<br>GN=XRRA1 PE=2 SV=2 - [XRRA1_HUMAN]             | 0.76  | 1 | 1 | 1 | 1 |      |      |      |      | 0.34 | 0.54 | 0.66 | 1.04 | 792  | 89.8  | 8.92 |
| O43895 | Xaa-Pro aminopeptidase 2 OS=Homo sapiens<br>GN=XPNPEP2 PE=1 SV=3 - [XPP2_HUMAN]                                   | 2.97  | 1 | 1 | 1 | 2 |      |      |      |      | 0.83 | 1.02 | 0.72 | 0.89 | 674  | 75.6  | 6.04 |

|        |                                                                                                        |       |   |   |   |    |      |      |      |      |      |      |      |      |      |       |      |
|--------|--------------------------------------------------------------------------------------------------------|-------|---|---|---|----|------|------|------|------|------|------|------|------|------|-------|------|
| P12955 | Xaa-Pro dipeptidase OS=Homo sapiens GN=PEPD PE=1 SV=3 - [PEPD_HUMAN]                                   | 19.07 | 1 | 8 | 8 | 36 | 1.01 | 0.95 | 1.08 | 1.01 | 1.03 | 1.02 | 0.94 | 0.99 | 493  | 54.5  | 6.00 |
| A4UGR9 | Xin actin-binding repeat-containing protein 2 OS=Homo sapiens GN=XIRP2 PE=1 SV=2 - [XIRP2_HUMAN]       | 2.52  | 1 | 4 | 4 | 5  | 1.54 | 1.73 | 0.79 | 0.89 | 1.02 | 1.11 | 1.06 | 1.15 | 3374 | 382.1 | 6.38 |
| Q6PP77 | XK-related protein 2 OS=Homo sapiens GN=XKRX PE=2 SV=2 - [XKR2_HUMAN]                                  | 3.79  | 1 | 1 | 1 | 2  |      |      |      |      | 0.66 | 0.30 | 0.95 | 0.43 | 449  | 52.0  | 8.21 |
| Q5GH76 | XK-related protein 4 OS=Homo sapiens GN=XKR4 PE=1 SV=1 - [XKR4_HUMAN]                                  | 4.92  | 1 | 2 | 2 | 2  | 1.05 | 1.23 | 1.29 | 1.52 | 1.58 | 1.33 | 1.26 | 1.05 | 650  | 71.5  | 7.78 |
| Q6UX68 | XK-related protein 5 OS=Homo sapiens GN=XKR5 PE=2 SV=1 - [XKR5_HUMAN]                                  | 1.60  | 1 | 1 | 1 | 1  | 0.78 | 0.84 | 0.77 | 0.84 |      |      |      |      | 686  | 74.9  | 6.68 |
| Q5GH73 | XK-related protein 6 OS=Homo sapiens GN=XKR6 PE=2 SV=1 - [XKR6_HUMAN]                                  | 3.28  | 1 | 1 | 1 | 2  | 1.22 | 1.03 | 1.19 | 1.01 |      |      |      |      | 641  | 71.6  | 7.90 |
| Q86Y38 | Xylosyltransferase 1 OS=Homo sapiens GN=XYLT1 PE=1 SV=1 - [XYLT1_HUMAN]                                | 1.88  | 1 | 1 | 1 | 1  | 1.54 | 1.05 | 1.22 | 0.84 |      |      |      |      | 959  | 107.5 | 9.22 |
| Q9H1B5 | Xylosyltransferase 2 OS=Homo sapiens GN=XYLT2 PE=2 SV=2 - [XYLT2_HUMAN]                                | 2.08  | 1 | 2 | 2 | 4  | 1.16 | 1.14 | 1.13 | 1.12 |      |      |      |      | 865  | 96.7  | 8.22 |
| Q9ULM3 | YEATS domain-containing protein 2 OS=Homo sapiens GN=YEATS2 PE=1 SV=2 - [YEATS2_HUMAN]                 | 2.39  | 1 | 2 | 2 | 2  |      |      |      |      | 0.50 | 0.60 | 0.69 | 0.97 | 1422 | 150.7 | 8.98 |
| A6XGL0 | YjeF N-terminal domain-containing protein 3 OS=Homo sapiens GN=YJEFN3 PE=1 SV=1 - [YJEN3_HUMAN]        | 5.69  | 1 | 1 | 1 | 5  |      |      |      |      | 1.05 | 1.20 | 1.10 | 1.26 | 299  | 32.6  | 6.09 |
| Q9BYJ9 | YTH domain family protein 1 OS=Homo sapiens GN=YTHDF1 PE=1 SV=1 - [YTHD1_HUMAN]                        | 2.86  | 1 | 1 | 1 | 1  | 1.30 | 1.29 | 1.51 | 1.51 |      |      |      |      | 559  | 60.8  | 8.79 |
| Q9Y5A9 | YTH domain family protein 2 OS=Homo sapiens GN=YTHDF2 PE=1 SV=2 - [YTHD2_HUMAN]                        | 5.87  | 1 | 1 | 1 | 1  |      | 0.28 | 0.64 |      |      |      |      |      | 579  | 62.3  | 8.79 |
| Q9H171 | Z-DNA-binding protein 1 OS=Homo sapiens GN=ZBP1 PE=1 SV=2 - [ZBP1_HUMAN]                               | 3.03  | 1 | 1 | 1 | 1  | 0.94 | 1.03 | 0.93 | 1.03 |      |      |      |      | 429  | 46.3  | 6.77 |
| Q9Y2K1 | Zinc finger and BTB domain-containing protein 1 OS=Homo sapiens GN=ZBTB1 PE=1 SV=3 - [ZBTB1_HUMAN]     | 2.24  | 1 | 1 | 1 | 6  | 0.85 | 0.92 | 1.03 | 1.17 | 1.16 | 0.96 | 0.85 | 0.71 | 713  | 82.0  | 6.39 |
| O95625 | Zinc finger and BTB domain-containing protein 11 OS=Homo sapiens GN=ZBTB11 PE=1 SV=2 - [ZBT11_HUMAN]   | 2.18  | 1 | 1 | 1 | 2  |      |      |      |      | 1.00 | 1.28 | 1.09 | 1.40 | 1053 | 119.3 | 8.66 |
| Q5SVQ8 | Zinc finger and BTB domain-containing protein 41 OS=Homo sapiens GN=ZBTB41 PE=2 SV=1 - [ZBT41_HUMAN]   | 1.87  | 1 | 1 | 1 | 1  |      |      |      |      | 0.92 | 0.83 | 0.80 | 0.72 | 909  | 105.1 | 7.93 |
| Q96K62 | Zinc finger and BTB domain-containing protein 45 OS=Homo sapiens GN=ZBTB45 PE=2 SV=1 - [ZBT45_HUMAN]   | 1.76  | 1 | 1 | 1 | 1  |      |      |      |      | 0.58 | 0.66 | 0.55 | 0.62 | 511  | 54.0  | 6.92 |
| Q96C00 | Zinc finger and BTB domain-containing protein 9 OS=Homo sapiens GN=ZBTB9 PE=1 SV=1 - [ZBTB9_HUMAN]     | 3.17  | 1 | 1 | 1 | 1  | 0.63 | 0.68 | 0.86 | 0.94 |      |      |      |      | 473  | 50.6  | 6.76 |
| Q8NBB4 | Zinc finger and SCAN domain-containing protein 1 OS=Homo sapiens GN=ZSCAN1 PE=2 SV=2 - [ZSCA1_HUMAN]   | 3.68  | 1 | 1 | 1 | 1  |      |      |      |      | 4.42 | 3.59 | 3.97 | 3.23 | 408  | 45.3  | 8.54 |
| Q7Z7L9 | Zinc finger and SCAN domain-containing protein 2 OS=Homo sapiens GN=ZSCAN2 PE=2 SV=2 - [ZSCA2_HUMAN]   | 6.03  | 1 | 1 | 1 | 1  |      |      |      |      | 0.91 | 1.30 | 1.14 | 1.62 | 614  | 69.5  | 7.34 |
| Q3MJ62 | Zinc finger and SCAN domain-containing protein 23 OS=Homo sapiens GN=ZSCAN23 PE=2 SV=1 - [ZSC23_HUMAN] | 3.86  | 1 | 1 | 1 | 1  | 1.00 | 1.09 | 0.97 | 1.05 |      |      |      |      | 389  | 44.9  | 6.32 |
| Q86W11 | Zinc finger and SCAN domain-containing protein 30 OS=Homo sapiens GN=ZSCAN30 PE=1 SV=1 - [ZSC30_HUMAN] | 3.64  | 1 | 1 | 2 | 2  |      |      |      |      | 0.83 | 0.80 | 0.85 | 0.82 | 494  | 56.3  | 6.70 |
| Q9BUG6 | Zinc finger and SCAN domain-containing protein 5A OS=Homo sapiens GN=ZSCAN5A PE=2 SV=1 - [ZSA5A_HUMAN] | 5.85  | 1 | 1 | 1 | 1  | 0.98 | 1.20 | 1.12 | 1.37 |      |      |      |      | 496  | 55.8  | 8.37 |
| A6NGD5 | Zinc finger and SCAN domain-containing protein 5C OS=Homo sapiens GN=ZSCAN5C PE=3 SV=1 - [ZSA5C_HUMAN] | 1.01  | 1 | 1 | 1 | 1  | 0.53 | 0.60 | 0.71 | 0.80 |      |      |      |      | 496  | 55.7  | 8.02 |
| O60293 | Zinc finger C3H1 domain-containing protein OS=Homo sapiens GN=ZFC3H1 PE=1 SV=3 - [ZC3H1_HUMAN]         | 1.51  | 1 | 1 | 1 | 2  | 0.88 | 0.50 | 0.70 | 0.41 |      |      |      |      | 1989 | 226.2 | 8.13 |
| Q5T200 | Zinc finger CCHH domain-containing protein 13 OS=Homo sapiens GN=ZC3H13 PE=1 SV=1 - [ZC3HD_HUMAN]      | 1.92  | 1 | 2 | 2 | 2  | 1.43 | 1.27 | 1.48 | 1.33 | 0.76 | 0.90 | 0.65 | 0.76 | 1668 | 196.5 | 9.42 |
| Q6PJT7 | Zinc finger CCHH domain-containing protein 14 OS=Homo sapiens GN=ZC3H14 PE=1 SV=1 - [ZC3HE_HUMAN]      | 1.49  | 1 | 1 | 1 | 1  | 0.58 | 0.94 | 0.76 | 1.23 |      |      |      |      | 736  | 82.8  | 7.31 |



|        |                                                                                                    |       |   |   |   |    |      |      |      |      |      |      |       |       |      |       |      |
|--------|----------------------------------------------------------------------------------------------------|-------|---|---|---|----|------|------|------|------|------|------|-------|-------|------|-------|------|
| Q86VM9 | Zinc finger CCCH domain-containing protein 18 OS=Homo sapiens GN=ZC3H18 PE=1 SV=2 - [ZCH18_HUMAN]  | 7.66  | 1 | 3 | 3 | 4  |      | 1.17 | 1.05 | 1.27 | 1.15 | 953  | 106.3 | 8.32  |      |       |      |
| Q8IXZ2 | Zinc finger CCCH domain-containing protein 3 OS=Homo sapiens GN=ZC3H3 PE=1 SV=3 - [ZC3H3_HUMAN]    | 0.84  | 1 | 1 | 1 | 2  | 1.29 | 1.27 | 1.36 | 1.25 |      | 948  | 101.9 | 10.95 |      |       |      |
| Q8IWR0 | Zinc finger CCCH domain-containing protein 7A OS=Homo sapiens GN=ZC3H7A PE=1 SV=1 - [Z3H7A_HUMAN]  | 1.44  | 1 | 1 | 1 | 10 | 1.02 | 0.92 | 1.06 | 0.96 | 1.06 | 0.95 | 1.06  | 0.92  | 971  | 110.5 | 7.30 |
| Q9UGR2 | Zinc finger CCCH domain-containing protein 7B OS=Homo sapiens GN=ZC3H7B PE=1 SV=1 - [Z3H7B_HUMAN]  | 2.01  | 2 | 1 | 2 | 3  | 1.06 | 0.68 | 1.24 | 0.80 |      |      |       |       | 993  | 111.5 | 7.17 |
| Q8TBK6 | Zinc finger CCHC domain-containing protein 10 OS=Homo sapiens GN=ZCCHC10 PE=2 SV=1 - [ZCH10_HUMAN] | 7.29  | 1 | 1 | 1 | 1  |      |      |      |      | 3.21 | 2.27 | 3.12  | 2.20  | 192  | 21.0  | 8.53 |
| Q6ZR62 | Zinc finger CCHC domain-containing protein 16 OS=Homo sapiens GN=ZCCHC16 PE=2 SV=2 - [ZCH16_HUMAN] | 10.65 | 1 | 1 | 1 | 1  | 1.39 | 1.78 | 1.79 | 2.32 |      |      |       |       | 310  | 34.7  | 5.80 |
| Q9C0B9 | Zinc finger CCHC domain-containing protein 2 OS=Homo sapiens GN=ZCCHC2 PE=1 SV=6 - [ZCHC2_HUMAN]   | 2.04  | 1 | 2 | 2 | 3  | 0.83 | 0.62 | 0.76 | 0.58 | 1.14 | 1.03 | 1.10  | 1.00  | 1178 | 125.9 | 7.01 |
| Q8N567 | Zinc finger CCHC domain-containing protein 9 OS=Homo sapiens GN=ZCCHC9 PE=2 SV=2 - [ZCHC9_HUMAN]   | 4.43  | 1 | 1 | 1 | 1  |      |      |      |      | 0.75 | 1.01 | 0.80  | 1.08  | 271  | 30.5  | 9.17 |
| P37275 | Zinc finger E-box-binding homeobox 1 OS=Homo sapiens GN=ZEB1 PE=1 SV=2 - [ZEB1_HUMAN]              | 2.31  | 1 | 2 | 2 | 3  | 1.09 | 1.46 | 0.87 | 1.17 | 1.42 | 1.50 | 1.15  | 1.21  | 1124 | 124.0 | 4.94 |
| Q9BQ24 | Zinc finger FYVE domain-containing protein 21 OS=Homo sapiens GN=ZFYVE21 PE=1 SV=1 - [ZFY21_HUMAN] | 4.70  | 1 | 1 | 1 | 1  |      |      |      |      | 1.06 | 1.09 | 0.92  | 0.95  | 234  | 26.5  | 8.41 |
| Q68DK2 | Zinc finger FYVE domain-containing protein 26 OS=Homo sapiens GN=ZFYVE26 PE=1 SV=3 - [ZFY26_HUMAN] | 1.77  | 3 | 2 | 3 | 4  | 1.30 | 1.17 | 1.03 | 0.93 | 1.06 | 1.14 | 0.86  | 0.93  | 2539 | 284.4 | 6.39 |
| O95405 | Zinc finger FYVE domain-containing protein 9 OS=Homo sapiens GN=ZFYVE9 PE=1 SV=2 - [ZFYV9_HUMAN]   | 4.84  | 1 | 3 | 3 | 13 | 0.83 | 0.78 | 0.92 | 0.97 | 1.02 | 0.62 | 1.24  | 0.83  | 1425 | 156.3 | 5.01 |
| Q86UP3 | Zinc finger homeobox protein 4 OS=Homo sapiens GN=ZFX4 PE=1 SV=1 - [ZFX4_HUMAN]                    | 2.64  | 3 | 6 | 6 | 24 | 1.32 | 1.30 | 1.24 | 1.39 | 1.18 | 0.64 | 1.10  | 0.67  | 3567 | 393.5 | 6.37 |
| Q9ULJ6 | Zinc finger MIZ domain-containing protein 1 OS=Homo sapiens GN=ZMIZ1 PE=1 SV=3 - [ZMIZ1_HUMAN]     | 2.25  | 8 | 1 | 2 | 2  |      |      |      |      | 1.23 |      |       |       | 1067 | 115.4 | 7.46 |
| Q5SVZ6 | Zinc finger MYM-type protein 1 OS=Homo sapiens GN=ZMYM1 PE=1 SV=1 - [ZMYM1_HUMAN]                  | 2.19  | 1 | 2 | 2 | 3  |      |      |      |      | 0.97 | 1.01 | 0.99  | 1.03  | 1142 | 128.6 | 7.44 |
| Q5VZL5 | Zinc finger MYM-type protein 4 OS=Homo sapiens GN=ZMYM4 PE=1 SV=1 - [ZMYM4_HUMAN]                  | 1.23  | 3 | 1 | 2 | 12 |      |      |      |      | 0.78 | 0.78 | 0.96  | 0.92  | 1548 | 172.7 | 6.84 |
| O95789 | Zinc finger MYM-type protein 6 OS=Homo sapiens GN=ZMYM6 PE=1 SV=2 - [ZMYM6_HUMAN]                  | 3.02  | 1 | 2 | 2 | 3  |      |      |      |      | 1.25 | 1.64 | 0.92  | 0.95  | 1325 | 148.0 | 8.22 |
| Q9H0C1 | Zinc finger MYND domain-containing protein 12 OS=Homo sapiens GN=ZMYND12 PE=2 SV=3 - [ZMY12_HUMAN] | 3.84  | 1 | 1 | 1 | 3  | 2.18 | 2.49 | 2.32 | 2.68 |      |      |       |       | 365  | 41.8  | 6.23 |
| P21506 | Zinc finger protein 10 OS=Homo sapiens GN=ZNF10 PE=2 SV=3 - [ZNF10_HUMAN]                          | 1.92  | 1 | 1 | 1 | 1  | 0.25 | 0.29 | 0.25 | 0.29 |      |      |       |       | 573  | 66.4  | 8.32 |
| Q8IZC7 | Zinc finger protein 101 OS=Homo sapiens GN=ZNF101 PE=1 SV=1 - [ZN101_HUMAN]                        | 2.06  | 1 | 1 | 1 | 1  |      |      |      |      | 0.58 | 0.55 | 1.03  | 0.96  | 436  | 50.3  | 9.57 |
| Q9UJU3 | Zinc finger protein 112 homolog OS=Homo sapiens GN=ZFP112 PE=2 SV=2 - [ZF112_HUMAN]                | 2.19  | 1 | 1 | 2 | 3  |      |      |      |      | 0.54 |      |       |       | 913  | 105.8 | 8.27 |
| P52740 | Zinc finger protein 132 OS=Homo sapiens GN=ZNF132 PE=2 SV=2 - [ZN132_HUMAN]                        | 1.84  | 1 | 1 | 1 | 4  | 0.77 | 0.76 | 0.75 | 0.75 | 0.85 | 0.81 | 0.83  | 0.79  | 706  | 80.6  | 8.40 |
| Q9HCL3 | Zinc finger protein 14 homolog OS=Homo sapiens GN=ZFP14 PE=2 SV=2 - [ZFP14_HUMAN]                  | 2.81  | 1 | 1 | 1 | 1  | 1.01 | 1.01 |      |      |      |      |       |       | 533  | 63.4  | 8.62 |
| Q9HCG1 | Zinc finger protein 160 OS=Homo sapiens GN=ZNF160 PE=1 SV=3 - [ZN160_HUMAN]                        | 1.96  | 1 | 1 | 1 | 1  |      |      |      |      | 1.23 | 1.14 | 1.27  | 1.18  | 818  | 94.1  | 9.28 |
| O43829 | Zinc finger protein 161 homolog OS=Homo sapiens GN=ZFP161 PE=2 SV=2 - [ZF161_HUMAN]                | 3.56  | 1 | 1 | 1 | 6  | 2.15 | 0.80 |      |      | 0.82 | 0.87 | 0.98  | 1.09  | 449  | 50.9  | 6.04 |
| Q13360 | Zinc finger protein 177 OS=Homo sapiens GN=ZNF177 PE=2 SV=3 - [ZN177_HUMAN]                        | 7.17  | 1 | 2 | 2 | 2  |      |      |      |      | 2.03 | 1.38 | 1.93  | 1.31  | 321  | 36.4  | 8.37 |
| P17022 | Zinc finger protein 18 OS=Homo sapiens GN=ZNF18 PE=2 SV=2 - [ZNF18_HUMAN]                          | 1.64  | 1 | 1 | 1 | 1  |      |      |      |      | 0.83 | 0.96 | 0.91  | 1.04  | 549  | 62.2  | 5.97 |

|        |                                                                                |      |   |   |   |    |      |      |      |      |      |      |      |      |      |       |      |
|--------|--------------------------------------------------------------------------------|------|---|---|---|----|------|------|------|------|------|------|------|------|------|-------|------|
| P17025 | Zinc finger protein 182 OS=Homo sapiens GN=ZNF182 PE=1 SV=2 - [ZN182_HUMAN]    | 2.03 | 1 | 1 | 1 | 53 | 0.84 | 0.90 | 0.86 | 0.87 | 1.13 | 1.22 | 1.10 | 1.06 | 639  | 73.6  | 8.68 |
| Q99676 | Zinc finger protein 184 OS=Homo sapiens GN=ZNF184 PE=1 SV=4 - [ZN184_HUMAN]    | 2.00 | 1 | 1 | 1 | 1  |      |      |      |      | 1.08 | 1.60 | 1.03 | 1.52 | 751  | 86.1  | 8.07 |
| O15231 | Zinc finger protein 185 OS=Homo sapiens GN=ZNF185 PE=1 SV=3 - [ZN185_HUMAN]    | 7.55 | 1 | 2 | 2 | 6  |      |      |      |      | 1.36 | 1.50 | 1.34 | 1.47 | 689  | 73.5  | 7.01 |
| O75820 | Zinc finger protein 189 OS=Homo sapiens GN=ZNF189 PE=2 SV=2 - [ZN189_HUMAN]    | 5.91 | 1 | 2 | 2 | 2  |      |      |      |      | 0.72 | 0.84 | 0.74 | 0.87 | 626  | 72.9  | 8.50 |
| O15535 | Zinc finger protein 193 OS=Homo sapiens GN=ZNF193 PE=2 SV=1 - [ZN193_HUMAN]    | 2.28 | 1 | 1 | 1 | 2  |      |      |      |      | 1.09 | 1.03 | 0.94 | 0.89 | 394  | 45.9  | 7.31 |
| O14628 | Zinc finger protein 195 OS=Homo sapiens GN=ZNF195 PE=1 SV=2 - [ZN195_HUMAN]    | 2.54 | 1 | 1 | 1 | 6  |      |      |      |      | 0.30 | 0.26 | 0.79 | 0.67 | 629  | 72.3  | 8.09 |
| O14709 | Zinc finger protein 197 OS=Homo sapiens GN=ZNF197 PE=2 SV=1 - [ZN197_HUMAN]    | 1.26 | 1 | 1 | 1 | 1  |      |      |      |      | 1.30 | 1.26 | 1.39 | 1.35 | 1029 | 118.8 | 8.59 |
| Q6ZN57 | Zinc finger protein 2 homolog OS=Homo sapiens GN=ZFP2 PE=2 SV=1 - [ZFP2_HUMAN] | 7.38 | 1 | 2 | 2 | 2  | 0.70 | 0.55 | 0.52 | 0.42 |      |      |      |      | 461  | 52.7  | 8.56 |
| O14771 | Zinc finger protein 213 OS=Homo sapiens GN=ZNF213 PE=2 SV=2 - [ZN213_HUMAN]    | 6.32 | 1 | 1 | 1 | 1  |      |      |      |      | 0.71 | 0.78 | 0.76 | 0.83 | 459  | 51.2  | 6.95 |
| Q9UL58 | Zinc finger protein 215 OS=Homo sapiens GN=ZNF215 PE=2 SV=2 - [ZN215_HUMAN]    | 8.70 | 1 | 3 | 3 | 4  | 0.75 | 0.57 | 0.73 | 0.58 | 0.32 | 0.56 | 0.61 | 1.07 | 517  | 60.0  | 8.72 |
| Q9P2Y4 | Zinc finger protein 219 OS=Homo sapiens GN=ZNF219 PE=1 SV=2 - [ZN219_HUMAN]    | 3.74 | 1 | 1 | 1 | 1  |      |      |      |      | 0.73 |      | 0.82 |      | 722  | 76.8  | 9.39 |
| Q9NZL3 | Zinc finger protein 224 OS=Homo sapiens GN=ZNF224 PE=1 SV=3 - [ZN224_HUMAN]    | 1.70 | 1 | 1 | 1 | 1  | 0.97 | 0.96 | 0.99 | 0.97 |      |      |      |      | 707  | 82.2  | 8.69 |
| Q9UK10 | Zinc finger protein 225 OS=Homo sapiens GN=ZNF225 PE=1 SV=2 - [ZN225_HUMAN]    | 2.12 | 1 | 2 | 2 | 2  |      |      |      |      | 0.86 | 0.59 | 1.00 | 0.68 | 706  | 82.4  | 8.91 |
| A6NK53 | Zinc finger protein 233 OS=Homo sapiens GN=ZNF233 PE=2 SV=3 - [ZN233_HUMAN]    | 1.94 | 1 | 1 | 1 | 1  |      |      |      |      | 0.91 | 0.95 | 0.88 | 0.92 | 670  | 76.8  | 8.25 |
| Q8WUN3 | Zinc finger protein 252 OS=Homo sapiens GN=ZNF252 PE=5 SV=2 - [ZN252_HUMAN]    | 4.25 | 1 | 2 | 2 | 2  | 1.21 | 1.21 | 1.26 | 1.28 | 0.78 | 0.89 | 0.96 | 1.11 | 682  | 78.7  | 8.46 |
| Q9Y2P7 | Zinc finger protein 256 OS=Homo sapiens GN=ZNF256 PE=1 SV=2 - [ZN256_HUMAN]    | 3.19 | 1 | 1 | 2 | 2  | 0.74 | 1.05 | 0.68 | 0.98 |      |      |      |      | 627  | 71.8  | 8.81 |
| O14978 | Zinc finger protein 263 OS=Homo sapiens GN=ZNF263 PE=2 SV=2 - [ZN263_HUMAN]    | 1.61 | 1 | 1 | 1 | 7  | 1.06 | 1.20 | 1.05 | 1.20 | 1.26 | 1.23 | 1.16 | 1.15 | 683  | 77.2  | 6.99 |
| Q14587 | Zinc finger protein 268 OS=Homo sapiens GN=ZNF268 PE=1 SV=2 - [ZN268_HUMAN]    | 1.06 | 1 | 1 | 1 | 6  |      |      |      |      | 0.60 | 0.50 | 0.91 | 0.74 | 947  | 108.3 | 8.87 |
| P17035 | Zinc finger protein 28 OS=Homo sapiens GN=ZNF28 PE=2 SV=5 - [ZNF28_HUMAN]      | 1.95 | 1 | 1 | 1 | 1  |      |      |      |      | 1.10 | 1.23 | 0.85 | 0.95 | 718  | 83.6  | 9.03 |
| Q8ND82 | Zinc finger protein 280C OS=Homo sapiens GN=ZNF280C PE=1 SV=1 - [Z280C_HUMAN]  | 1.90 | 1 | 1 | 1 | 1  |      |      |      |      | 0.91 | 0.88 | 0.88 | 0.84 | 737  | 83.0  | 9.11 |
| Q6N043 | Zinc finger protein 280D OS=Homo sapiens GN=ZNF280D PE=1 SV=3 - [Z280D_HUMAN]  | 2.96 | 1 | 1 | 1 | 1  |      |      |      |      | 0.72 | 0.86 | 0.73 | 0.87 | 979  | 109.2 | 8.19 |
| P17039 | Zinc finger protein 30 OS=Homo sapiens GN=ZNF30 PE=2 SV=5 - [ZNF30_HUMAN]      | 0.96 | 1 | 1 | 1 | 3  |      |      |      |      | 0.90 | 0.97 | 0.64 | 0.69 | 623  | 71.4  | 9.07 |
| Q96RE9 | Zinc finger protein 300 OS=Homo sapiens GN=ZNF300 PE=2 SV=1 - [ZN300_HUMAN]    | 2.15 | 1 | 1 | 1 | 2  | 1.01 | 1.04 | 1.13 | 1.18 | 1.04 | 1.02 | 1.03 | 1.02 | 604  | 68.7  | 8.70 |
| Q9HCX3 | Zinc finger protein 304 OS=Homo sapiens GN=ZNF304 PE=2 SV=2 - [ZN304_HUMAN]    | 4.40 | 1 | 2 | 2 | 2  |      |      |      |      | 0.74 | 0.40 | 0.81 | 0.43 | 659  | 75.0  | 8.35 |
| Q96PQ6 | Zinc finger protein 317 OS=Homo sapiens GN=ZNF317 PE=2 SV=2 - [ZN317_HUMAN]    | 2.52 | 1 | 1 | 1 | 1  |      |      |      |      | 0.69 | 0.86 | 1.12 | 1.40 | 595  | 67.9  | 8.98 |
| A2RRD8 | Zinc finger protein 320 OS=Homo sapiens GN=ZNF320 PE=2 SV=1 - [ZN320_HUMAN]    | 1.96 | 1 | 1 | 1 | 1  |      |      |      |      | 1.10 | 1.01 | 1.41 | 1.29 | 509  | 59.3  | 8.91 |
| O75467 | Zinc finger protein 324A OS=Homo sapiens GN=ZNF324 PE=1 SV=1 - [Z324A_HUMAN]   | 6.15 | 1 | 2 | 2 | 3  | 0.66 | 0.78 | 0.66 | 0.79 | 0.91 | 0.72 | 0.64 | 0.51 | 553  | 61.1  | 9.57 |

|        |                                                                               |      |   |   |   |    |      |      |      |      |      |      |      |      |  |  |      |       |      |
|--------|-------------------------------------------------------------------------------|------|---|---|---|----|------|------|------|------|------|------|------|------|--|--|------|-------|------|
| Q6AW86 | Zinc finger protein 324B OS=Homo sapiens GN=ZNF324B PE=2 SV=1 - [Z324B_HUMAN] | 2.76 | 1 | 1 | 1 | 1  | 4.85 | 5.19 | 4.62 | 4.99 |      |      |      |      |  |  | 544  | 60.6  | 9.69 |
| Q86UD4 | Zinc finger protein 329 OS=Homo sapiens GN=ZNF329 PE=2 SV=2 - [ZN329_HUMAN]   | 2.40 | 1 | 2 | 2 | 6  |      |      |      |      | 0.76 | 0.25 | 0.71 | 0.50 |  |  | 541  | 61.7  | 8.60 |
| Q9UL40 | Zinc finger protein 346 OS=Homo sapiens GN=ZNF346 PE=1 SV=1 - [ZN346_HUMAN]   | 2.38 | 1 | 1 | 1 | 1  |      |      |      |      | 1.03 | 1.14 | 0.97 | 1.06 |  |  | 294  | 32.9  | 9.09 |
| Q96LW1 | Zinc finger protein 354B OS=Homo sapiens GN=ZNF354B PE=2 SV=1 - [Z354B_HUMAN] | 2.29 | 1 | 1 | 1 | 1  | 1.13 | 1.56 | 1.00 | 1.38 |      |      |      |      |  |  | 612  | 70.5  | 9.50 |
| Q86Y25 | Zinc finger protein 354C OS=Homo sapiens GN=ZNF354C PE=2 SV=1 - [Z354C_HUMAN] | 3.97 | 1 | 2 | 2 | 4  | 1.17 | 1.45 | 1.36 | 1.69 | 0.30 | 0.36 | 0.30 | 0.37 |  |  | 554  | 64.8  | 8.05 |
| Q96SR6 | Zinc finger protein 382 OS=Homo sapiens GN=ZNF382 PE=2 SV=3 - [ZN382_HUMAN]   | 2.36 | 1 | 1 | 1 | 1  |      |      |      |      | 0.72 | 0.88 |      |      |  |  | 550  | 64.0  | 9.31 |
| Q9H8N7 | Zinc finger protein 395 OS=Homo sapiens GN=ZNF395 PE=1 SV=2 - [ZN395_HUMAN]   | 4.29 | 1 | 1 | 1 | 1  | 1.33 | 1.16 | 1.28 | 1.12 |      |      |      |      |  |  | 513  | 54.9  | 7.43 |
| Q8NF99 | Zinc finger protein 397 OS=Homo sapiens GN=ZNF397 PE=1 SV=2 - [ZN397_HUMAN]   | 1.87 | 1 | 1 | 1 | 1  | 0.50 | 1.15 |      |      |      |      |      |      |  |  | 534  | 61.1  | 7.27 |
| Q9C0G0 | Zinc finger protein 407 OS=Homo sapiens GN=ZNF407 PE=2 SV=2 - [ZN407_HUMAN]   | 0.89 | 1 | 1 | 1 | 1  | 0.93 | 0.93 | 0.84 | 0.84 |      |      |      |      |  |  | 2248 | 247.2 | 6.49 |
| Q2M1K9 | Zinc finger protein 423 OS=Homo sapiens GN=ZNF423 PE=1 SV=1 - [ZN423_HUMAN]   | 4.21 | 1 | 2 | 2 | 4  | 1.99 | 2.16 | 2.14 | 2.32 | 1.02 | 0.99 | 1.06 | 1.03 |  |  | 1284 | 144.5 | 6.89 |
| Q6IV72 | Zinc finger protein 425 OS=Homo sapiens GN=ZNF425 PE=2 SV=1 - [ZN425_HUMAN]   | 1.99 | 1 | 1 | 1 | 12 | 0.75 | 0.85 | 0.69 | 0.75 | 0.51 | 0.46 | 0.54 | 0.50 |  |  | 752  | 87.7  | 9.25 |
| Q7Z4V0 | Zinc finger protein 438 OS=Homo sapiens GN=ZNF438 PE=2 SV=1 - [ZN438_HUMAN]   | 3.26 | 1 | 1 | 1 | 1  | 0.82 | 0.88 | 0.95 | 1.02 |      |      |      |      |  |  | 828  | 91.8  | 9.39 |
| Q9Y4E5 | Zinc finger protein 451 OS=Homo sapiens GN=ZNF451 PE=2 SV=2 - [ZN451_HUMAN]   | 1.98 | 1 | 1 | 1 | 1  |      |      |      |      | 1.00 |      |      |      |  |  | 1061 | 121.4 | 6.77 |
| Q8TAF7 | Zinc finger protein 461 OS=Homo sapiens GN=ZNF461 PE=2 SV=2 - [ZN461_HUMAN]   | 1.60 | 1 | 1 | 1 | 1  | 0.92 | 1.03 | 0.79 | 0.90 |      |      |      |      |  |  | 563  | 66.2  | 8.25 |
| Q96JM2 | Zinc finger protein 462 OS=Homo sapiens GN=ZNF462 PE=1 SV=3 - [ZN462_HUMAN]   | 1.96 | 1 | 1 | 2 | 5  |      |      |      |      | 0.89 | 1.70 | 1.06 | 2.01 |  |  | 2506 | 284.5 | 7.58 |
| Q96JG9 | Zinc finger protein 469 OS=Homo sapiens GN=ZNF469 PE=1 SV=3 - [ZN469_HUMAN]   | 0.36 | 1 | 1 | 1 | 1  |      |      |      |      | 1.02 | 0.86 | 1.04 | 0.88 |  |  | 3925 | 409.9 | 7.72 |
| Q6ECI4 | Zinc finger protein 470 OS=Homo sapiens GN=ZNF470 PE=1 SV=3 - [ZN470_HUMAN]   | 1.53 | 1 | 1 | 1 | 1  | 1.12 | 1.28 | 1.15 | 1.32 |      |      |      |      |  |  | 717  | 82.6  | 8.57 |
| Q96MN9 | Zinc finger protein 488 OS=Homo sapiens GN=ZNF488 PE=1 SV=1 - [ZN488_HUMAN]   | 4.41 | 1 | 1 | 1 | 1  | 1.12 | 0.92 | 1.28 | 1.06 |      |      |      |      |  |  | 340  | 36.9  | 8.95 |
| Q96F45 | Zinc finger protein 503 OS=Homo sapiens GN=ZNF503 PE=1 SV=1 - [ZN503_HUMAN]   | 3.41 | 1 | 1 | 1 | 1  | 0.65 | 0.64 | 0.59 | 0.59 |      |      |      |      |  |  | 646  | 62.5  | 8.70 |
| Q8TCN5 | Zinc finger protein 507 OS=Homo sapiens GN=ZNF507 PE=1 SV=2 - [ZN507_HUMAN]   | 1.57 | 1 | 1 | 1 | 7  | 1.28 | 1.17 | 1.46 | 1.29 |      |      |      |      |  |  | 953  | 105.7 | 5.72 |
| Q6AHZ1 | Zinc finger protein 518A OS=Homo sapiens GN=ZNF518A PE=1 SV=2 - [Z518A_HUMAN] | 2.56 | 1 | 3 | 3 | 4  | 0.75 | 0.84 | 0.73 | 0.82 | 1.02 | 0.93 | 1.04 | 0.95 |  |  | 1483 | 166.7 | 9.28 |
| Q96K83 | Zinc finger protein 521 OS=Homo sapiens GN=ZNF521 PE=1 SV=1 - [ZN521_HUMAN]   | 2.75 | 1 | 1 | 2 | 2  | 1.78 | 1.49 |      |      |      |      |      |      |  |  | 1311 | 147.8 | 7.01 |
| Q9HCE3 | Zinc finger protein 532 OS=Homo sapiens GN=ZNF532 PE=1 SV=2 - [ZN532_HUMAN]   | 1.38 | 1 | 1 | 1 | 2  | 0.26 | 0.24 | 0.18 | 0.17 |      |      |      |      |  |  | 1301 | 141.6 | 8.65 |
| Q76KX8 | Zinc finger protein 534 OS=Homo sapiens GN=ZNF534 PE=2 SV=1 - [ZN534_HUMAN]   | 7.12 | 1 | 2 | 3 | 5  | 0.59 | 1.20 | 0.64 | 0.86 | 1.33 | 0.88 | 1.41 | 0.93 |  |  | 674  | 77.1  | 9.25 |
| Q7Z398 | Zinc finger protein 550 OS=Homo sapiens GN=ZNF550 PE=1 SV=2 - [ZN550_HUMAN]   | 2.61 | 1 | 1 | 1 | 1  |      |      |      |      | 1.29 | 1.33 | 1.01 | 1.04 |  |  | 422  | 48.4  | 8.63 |
| Q7Z340 | Zinc finger protein 551 OS=Homo sapiens GN=ZNF551 PE=1 SV=3 - [ZN551_HUMAN]   | 1.04 | 1 | 1 | 1 | 1  | 1.03 | 1.19 | 1.04 | 1.22 |      |      |      |      |  |  | 670  | 77.5  | 8.35 |
| Q86TJ5 | Zinc finger protein 554 OS=Homo sapiens GN=ZNF554 PE=2 SV=1 - [ZN554_HUMAN]   | 2.79 | 1 | 1 | 1 | 1  |      |      |      |      | 0.82 | 0.75 | 0.98 | 0.90 |  |  | 538  | 60.5  | 7.61 |

|        |                                                                                                     |       |   |   |   |    |      |      |      |      |      |      |      |      |      |       |      |
|--------|-----------------------------------------------------------------------------------------------------|-------|---|---|---|----|------|------|------|------|------|------|------|------|------|-------|------|
| Q8NEP9 | Zinc finger protein 555 OS=Homo sapiens GN=ZNF555 PE=2 SV=4 - [ZN555_HUMAN]                         | 1.43  | 1 | 1 | 1 | 1  | 0.77 | 1.03 | 0.68 | 0.91 |      | 628  | 73.0 | 9.04 |      |       |      |
| Q9BR84 | Zinc finger protein 559 OS=Homo sapiens GN=ZNF559 PE=2 SV=1 - [ZN559_HUMAN]                         | 2.97  | 1 | 1 | 1 | 3  |      |      |      |      | 0.17 | 0.20 | 0.33 | 0.43 | 538  | 62.3  | 8.56 |
| Q8N587 | Zinc finger protein 561 OS=Homo sapiens GN=ZNF561 PE=2 SV=2 - [ZN561_HUMAN]                         | 4.32  | 2 | 2 | 2 | 2  |      |      |      |      | 0.34 | 0.39 | 0.68 | 0.78 | 486  | 55.2  | 8.82 |
| Q8TA94 | Zinc finger protein 563 OS=Homo sapiens GN=ZNF563 PE=2 SV=1 - [ZN563_HUMAN]                         | 5.46  | 1 | 1 | 1 | 1  | 0.86 | 0.87 | 0.77 | 0.78 |      |      |      |      | 476  | 55.4  | 9.14 |
| Q8TBZ8 | Zinc finger protein 564 OS=Homo sapiens GN=ZNF564 PE=2 SV=1 - [ZN564_HUMAN]                         | 6.51  | 1 | 2 | 2 | 2  | 0.85 | 0.47 | 1.01 | 0.57 | 0.79 | 2.03 | 0.83 | 2.14 | 553  | 63.7  | 8.68 |
| Q8NAF0 | Zinc finger protein 579 OS=Homo sapiens GN=ZNF579 PE=1 SV=2 - [ZN579_HUMAN]                         | 1.25  | 1 | 1 | 1 | 1  |      |      |      |      | 0.10 | 0.14 | 0.12 | 0.17 | 562  | 60.5  | 8.69 |
| Q86UQ0 | Zinc finger protein 589 OS=Homo sapiens GN=ZNF589 PE=1 SV=1 - [ZN589_HUMAN]                         | 3.02  | 1 | 1 | 1 | 1  |      |      |      |      | 0.99 | 0.96 | 0.95 | 0.92 | 364  | 41.2  | 8.27 |
| Q92610 | Zinc finger protein 592 OS=Homo sapiens GN=ZNF592 PE=1 SV=2 - [ZN592_HUMAN]                         | 1.34  | 1 | 1 | 1 | 1  |      |      |      |      | 0.26 | 0.24 | 0.28 | 0.26 | 1267 | 137.4 | 7.84 |
| O00488 | Zinc finger protein 593 OS=Homo sapiens GN=ZNF593 PE=1 SV=2 - [ZN593_HUMAN]                         | 14.18 | 1 | 1 | 1 | 1  |      |      |      |      | 1.29 | 1.34 | 1.15 | 1.20 | 134  | 15.2  | 9.82 |
| Q86UK7 | Zinc finger protein 598 OS=Homo sapiens GN=ZNF598 PE=1 SV=1 - [ZN598_HUMAN]                         | 1.66  | 1 | 1 | 1 | 1  |      |      |      |      | 0.86 | 1.52 | 7.65 | #### | 904  | 98.6  | 8.40 |
| Q8WXB4 | Zinc finger protein 606 OS=Homo sapiens GN=ZNF606 PE=2 SV=1 - [ZN606_HUMAN]                         | 1.01  | 1 | 1 | 1 | 1  |      |      |      |      | 0.72 |      |      |      | 792  | 91.8  | 7.88 |
| Q96SK3 | Zinc finger protein 607 OS=Homo sapiens GN=ZNF607 PE=2 SV=3 - [ZN607_HUMAN]                         | 0.86  | 1 | 1 | 1 | 1  |      |      |      |      | 1.03 | 0.59 | 0.89 | 0.51 | 696  | 80.5  | 8.60 |
| Q8N212 | Zinc finger protein 619 OS=Homo sapiens GN=ZNF619 PE=2 SV=1 - [ZN619_HUMAN]                         | 5.36  | 1 | 2 | 2 | 6  | 0.83 | 0.90 | 0.97 | 1.06 | 0.91 | 0.85 | 1.02 | 0.97 | 560  | 63.3  | 8.35 |
| Q9P2J8 | Zinc finger protein 624 OS=Homo sapiens GN=ZNF624 PE=2 SV=3 - [ZN624_HUMAN]                         | 1.50  | 1 | 1 | 1 | 1  |      |      |      |      | 3.35 | 2.04 | 3.37 | 2.06 | 865  | 99.9  | 8.88 |
| Q14966 | Zinc finger protein 638 OS=Homo sapiens GN=ZNF638 PE=1 SV=2 - [ZN638_HUMAN]                         | 2.28  | 1 | 2 | 2 | 4  | 1.36 | 0.99 | 1.06 | 0.78 |      |      |      |      | 1978 | 220.5 | 6.38 |
| Q9NPA5 | Zinc finger protein 64 homolog, isoforms 1 and 2 OS=Homo sapiens GN=ZFP64 PE=1 SV=3 - [ZF64A_HUMAN] | 3.23  | 4 | 1 | 2 | 2  | 1.14 | 1.21 | 1.21 | 1.28 |      |      |      |      | 681  | 74.6  | 8.40 |
| Q9UJL9 | Zinc finger protein 643 OS=Homo sapiens GN=ZNF643 PE=2 SV=2 - [ZN643_HUMAN]                         | 2.06  | 1 | 2 | 2 | 3  |      |      |      |      | 1.15 | 1.38 | 1.22 | 1.46 | 534  | 61.4  | 9.01 |
| Q9Y2D9 | Zinc finger protein 652 OS=Homo sapiens GN=ZNF652 PE=1 SV=3 - [ZN652_HUMAN]                         | 4.79  | 1 | 1 | 1 | 1  | 0.16 | 0.29 |      |      |      |      |      |      | 606  | 69.7  | 8.65 |
| Q96CK0 | Zinc finger protein 653 OS=Homo sapiens GN=ZNF653 PE=1 SV=1 - [ZN653_HUMAN]                         | 2.11  | 1 | 1 | 1 | 1  | 1.45 | 1.28 | 1.77 | 1.57 |      |      |      |      | 615  | 67.2  | 6.98 |
| Q6ZS27 | Zinc finger protein 662 OS=Homo sapiens GN=ZNF662 PE=2 SV=1 - [ZN662_HUMAN]                         | 15.49 | 1 | 3 | 3 | 8  |      |      |      |      | 0.71 | 0.98 | 0.82 | 0.83 | 426  | 48.5  | 7.66 |
| Q2M3X9 | Zinc finger protein 674 OS=Homo sapiens GN=ZNF674 PE=1 SV=1 - [ZN674_HUMAN]                         | 1.89  | 1 | 1 | 1 | 2  |      |      |      |      |      | 0.41 | 0.23 |      | 581  | 67.2  | 9.16 |
| Q8TD23 | Zinc finger protein 675 OS=Homo sapiens GN=ZNF675 PE=1 SV=3 - [ZN675_HUMAN]                         | 2.99  | 1 | 1 | 1 | 2  | 1.12 | 1.12 | 1.15 | 1.17 |      |      |      |      | 568  | 66.3  | 8.87 |
| O95780 | Zinc finger protein 682 OS=Homo sapiens GN=ZNF682 PE=2 SV=1 - [ZN682_HUMAN]                         | 2.61  | 1 | 1 | 1 | 1  |      |      |      |      |      | 1.24 |      |      | 498  | 58.3  | 9.00 |
| Q5TEC3 | Zinc finger protein 697 OS=Homo sapiens GN=ZNF697 PE=2 SV=2 - [ZN697_HUMAN]                         | 2.20  | 1 | 1 | 1 | 33 | 0.88 | 1.03 | 0.84 | 0.97 | 1.09 | 0.83 | 1.12 | 0.85 | 545  | 60.4  | 7.28 |
| Q9UC06 | Zinc finger protein 70 OS=Homo sapiens GN=ZNF70 PE=2 SV=2 - [ZN70_HUMAN]                            | 4.71  | 1 | 1 | 1 | 1  | 1.00 | 0.96 | 0.98 | 0.94 |      |      |      |      | 446  | 50.8  | 8.31 |
| Q96C28 | Zinc finger protein 707 OS=Homo sapiens GN=ZNF707 PE=2 SV=2 - [ZN707_HUMAN]                         | 1.89  | 1 | 1 | 1 | 1  |      |      |      |      | 1.12 | 0.25 | 0.86 | 0.19 | 371  | 43.1  | 9.61 |
| Q8N859 | Zinc finger protein 713 OS=Homo sapiens GN=ZNF713 PE=2 SV=1 - [ZN713_HUMAN]                         | 1.86  | 1 | 1 | 1 | 1  |      |      |      |      | 1.05 | 1.02 | 0.83 | 0.81 | 430  | 50.1  | 6.98 |

|        |                                                                                         |       |   |   |   |   |      |      |      |      |      |      |       |      |       |       |      |
|--------|-----------------------------------------------------------------------------------------|-------|---|---|---|---|------|------|------|------|------|------|-------|------|-------|-------|------|
| Q96N38 | Zinc finger protein 714 OS=Homo sapiens GN=ZNF714 PE=2 SV=2 - [ZNF714_HUMAN]            | 2.16  | 1 | 1 | 1 | 1 | 1.28 | 1.33 | 1.07 | 1.11 |      | 555  | 64.0  | 9.10 |       |       |      |
| O43830 | Zinc finger protein 73 OS=Homo sapiens GN=ZNF73 PE=3 SV=1 - [ZNF73_HUMAN]               | 6.75  | 1 | 1 | 1 | 1 | 0.94 | 0.93 | 0.91 | 0.91 |      | 326  | 38.2  | 9.17 |       |       |      |
| O43361 | Zinc finger protein 749 OS=Homo sapiens GN=ZNF749 PE=1 SV=2 - [ZNF749_HUMAN]            | 2.44  | 1 | 1 | 1 | 1 | 1.51 | 1.56 | 1.42 | 1.48 |      | 778  | 90.3  | 8.70 |       |       |      |
| Q96N20 | Zinc finger protein 75A OS=Homo sapiens GN=ZNF75A PE=2 SV=1 - [ZNF75A_HUMAN]            | 6.76  | 1 | 1 | 1 | 1 | 0.95 | 1.02 | 0.69 | 0.74 |      | 296  | 34.7  | 9.48 |       |       |      |
| Q86XN6 | Zinc finger protein 761 OS=Homo sapiens GN=ZNF761 PE=2 SV=2 - [ZNF761_HUMAN]            | 1.21  | 1 | 1 | 1 | 2 | 1.18 | 1.00 | 1.06 | 0.90 |      | 746  | 87.7  | 9.00 |       |       |      |
| Q0D2J5 | Zinc finger protein 763 OS=Homo sapiens GN=ZNF763 PE=2 SV=2 - [ZNF763_HUMAN]            | 3.81  | 1 | 1 | 1 | 1 |      |      |      | 0.48 | 0.35 | 0.81 | 0.59  | 394  | 46.1  | 9.13  |      |
| Q68DY9 | Zinc finger protein 772 OS=Homo sapiens GN=ZNF772 PE=2 SV=2 - [ZNF772_HUMAN]            | 3.89  | 1 | 2 | 2 | 3 | 1.10 | 1.04 | 1.10 | 1.05 | 0.45 | 0.59 | 0.80  | 1.03 | 489   | 55.3  | 7.71 |
| Q96BV0 | Zinc finger protein 775 OS=Homo sapiens GN=ZNF775 PE=1 SV=2 - [ZNF775_HUMAN]            | 1.68  | 1 | 1 | 1 | 1 |      |      |      | 0.80 | 0.73 | 0.99 | 0.89  | 537  | 59.7  | 10.17 |      |
| Q8NCA9 | Zinc finger protein 784 OS=Homo sapiens GN=ZNF784 PE=2 SV=1 - [ZNF784_HUMAN]            | 9.91  | 1 | 2 | 2 | 2 | 0.83 | 0.74 | 0.85 | 0.76 |      | 323  | 34.2  | 7.80 |       |       |      |
| Q8N393 | Zinc finger protein 786 OS=Homo sapiens GN=ZNF786 PE=2 SV=2 - [ZNF786_HUMAN]            | 1.66  | 1 | 1 | 1 | 1 |      |      |      | 2.04 | 2.30 | 1.17 | 1.32  | 782  | 89.8  | 9.13  |      |
| Q5FWF6 | Zinc finger protein 789 OS=Homo sapiens GN=ZNF789 PE=2 SV=3 - [ZNF789_HUMAN]            | 1.18  | 1 | 1 | 1 | 2 |      |      |      | 0.88 | 0.82 | 1.03 | 0.95  | 425  | 50.0  | 9.10  |      |
| Q6PG37 | Zinc finger protein 790 OS=Homo sapiens GN=ZNF790 PE=2 SV=2 - [ZNF790_HUMAN]            | 2.36  | 1 | 1 | 1 | 2 |      |      |      | 1.82 | 1.97 | 1.27 | 1.37  | 636  | 74.5  | 8.47  |      |
| Q3KP31 | Zinc finger protein 791 OS=Homo sapiens GN=ZNF791 PE=2 SV=1 - [ZNF791_HUMAN]            | 1.74  | 1 | 1 | 1 | 1 |      |      |      | 0.63 | 0.80 | 0.66 | 0.84  | 576  | 66.8  | 9.22  |      |
| Q5CZA5 | Zinc finger protein 805 OS=Homo sapiens GN=ZNF805 PE=2 SV=3 - [ZNF805_HUMAN]            | 1.91  | 1 | 1 | 1 | 1 | 1.87 | 1.80 | 1.73 | 1.67 |      | 627  | 71.1  | 7.69 |       |       |      |
| Q8N4W9 | Zinc finger protein 808 OS=Homo sapiens GN=ZNF808 PE=2 SV=2 - [ZNF808_HUMAN]            | 1.44  | 1 | 1 | 1 | 1 |      |      |      | 0.72 | 0.71 | 0.66 | 0.66  | 903  | 104.8 | 9.48  |      |
| P51508 | Zinc finger protein 81 OS=Homo sapiens GN=ZNF81 PE=1 SV=3 - [ZNF81_HUMAN]               | 2.12  | 1 | 1 | 1 | 1 | 0.96 | 0.95 | 1.04 | 1.03 |      | 661  | 75.9  | 8.68 |       |       |      |
| Q6ZN06 | Zinc finger protein 813 OS=Homo sapiens GN=ZNF813 PE=2 SV=2 - [ZNF813_HUMAN]            | 2.92  | 1 | 2 | 2 | 2 | 1.33 | 1.44 | 1.06 | 1.16 |      | 617  | 71.7  | 9.36 |       |       |      |
| Q8N141 | Zinc finger protein 82 homolog OS=Homo sapiens GN=ZFP82 PE=2 SV=1 - [ZFP82_HUMAN]       | 1.88  | 1 | 1 | 1 | 1 | 0.38 | 1.10 | 0.26 | 0.77 |      | 532  | 62.5  | 8.98 |       |       |      |
| A8K0R7 | Zinc finger protein 839 OS=Homo sapiens GN=ZNF839 PE=2 SV=1 - [ZNF839_HUMAN]            | 10.36 | 1 | 4 | 4 | 4 | 1.00 | 1.23 | 1.13 | 1.15 | 1.41 | 1.69 | 1.03  | 1.24 | 811   | 87.4  | 6.54 |
| P51523 | Zinc finger protein 84 OS=Homo sapiens GN=ZNF84 PE=2 SV=2 - [ZNF84_HUMAN]               | 3.25  | 1 | 1 | 1 | 1 |      |      |      | 1.01 | 1.11 | 0.92 | 1.02  | 738  | 85.4  | 8.78  |      |
| O60290 | Zinc finger protein 862 OS=Homo sapiens GN=ZNF862 PE=2 SV=2 - [ZNF862_HUMAN]            | 1.45  | 1 | 1 | 1 | 1 | 0.84 | 0.73 | 0.83 | 0.72 |      | 1169 | 131.6 | 7.23 |       |       |      |
| C9JN71 | Zinc finger protein 878 OS=Homo sapiens GN=ZNF878 PE=3 SV=2 - [ZNF878_HUMAN]            | 5.84  | 1 | 2 | 2 | 2 | 0.78 | 0.82 |      | 1.19 | 1.13 | 1.10 | 1.05  | 531  | 61.5  | 9.45  |      |
| P0CJ79 | Zinc finger protein 888 OS=Homo sapiens GN=ZNF888 PE=3 SV=1 - [ZNF888_HUMAN]            | 1.40  | 1 | 1 | 1 | 1 | 1.06 | 1.25 | 1.16 | 1.39 |      | 500  | 58.7  | 9.09 |       |       |      |
| Q03938 | Zinc finger protein 90 OS=Homo sapiens GN=ZNF90 PE=2 SV=3 - [ZNF90_HUMAN]               | 2.66  | 1 | 1 | 1 | 1 | 0.38 | 0.19 | 0.57 | 0.28 |      | 601  | 69.0  | 9.22 |       |       |      |
| A8MXY4 | Zinc finger protein 99 OS=Homo sapiens GN=ZNF99 PE=2 SV=2 - [ZNF99_HUMAN]               | 0.87  | 1 | 1 | 1 | 5 | 1.03 | 0.98 | 0.97 | 0.98 | 0.81 | 0.81 | 0.93  | 0.93 | 1036  | 120.0 | 9.31 |
| Q6ZN30 | Zinc finger protein basoenuclin-2 OS=Homo sapiens GN=BNC2 PE=2 SV=1 - [BNC2_HUMAN]      | 1.00  | 1 | 1 | 1 | 5 | 1.19 | 1.02 | 1.09 | 0.95 | 1.04 | 1.13 | 0.95  | 1.06 | 1099  | 122.3 | 6.52 |
| Q86V15 | Zinc finger protein castor homolog 1 OS=Homo sapiens GN=CASZ1 PE=2 SV=4 - [CASZ1_HUMAN] | 0.74  | 1 | 1 | 1 | 1 |      |      |      | 0.86 | 1.04 | 0.89 | 1.08  | 1759 | 189.9 | 7.03  |      |

|        |                                                                                                                |       |   |    |    |     |      |      |      |      |      |      |       |       |      |       |      |
|--------|----------------------------------------------------------------------------------------------------------------|-------|---|----|----|-----|------|------|------|------|------|------|-------|-------|------|-------|------|
| Q5VTD9 | Zinc finger protein Gfi-1b OS=Homo sapiens GN=GF11B PE=1 SV=1 - [GF11B_HUMAN]                                  | 7.27  | 1 | 1  | 1  | 1   | 1.10 | 1.27 | 1.07 | 1.25 |      | 330  | 37.5  | 9.04  |      |       |      |
| P10070 | Zinc finger protein GLI2 OS=Homo sapiens GN=GLI2 PE=1 SV=4 - [GLI2_HUMAN]                                      | 1.32  | 1 | 1  | 1  | 4   | 1.00 | 0.88 | 1.25 | 1.11 |      | 1586 | 167.7 | 7.33  |      |       |      |
| P10075 | Zinc finger protein GLI4 OS=Homo sapiens GN=GLI4 PE=1 SV=2 - [GLI4_HUMAN]                                      | 4.52  | 1 | 1  | 1  | 2   | 1.14 | 1.36 | 1.19 | 1.42 |      | 376  | 41.1  | 8.81  |      |       |      |
| Q6DJT9 | Zinc finger protein PLAG1 OS=Homo sapiens GN=PLAG1 PE=1 SV=1 - [PLAG1_HUMAN]                                   | 3.40  | 1 | 1  | 1  | 3   | 1.19 | 1.14 | 1.24 | 1.18 |      | 500  | 55.9  | 8.56  |      |       |      |
| Q63HK3 | Zinc finger protein with KRAB and SCAN domains 2 OS=Homo sapiens GN=ZKSCAN2 PE=1 SV=2 - [ZKSC2_HUMAN]          | 4.65  | 1 | 2  | 2  | 9   | 0.89 | 0.90 | 0.99 | 0.94 | 1.31 | 1.36 | 1.25  | 1.31  | 967  | 110.9 | 8.35 |
| Q9BRR0 | Zinc finger protein with KRAB and SCAN domains 3 OS=Homo sapiens GN=ZKSCAN3 PE=1 SV=2 - [ZKSC3_HUMAN]          | 1.67  | 1 | 1  | 1  | 1   | 0.71 | 0.83 | 0.72 | 0.84 |      | 538  | 60.6  | 6.40  |      |       |      |
| Q9Y2L8 | Zinc finger protein with KRAB and SCAN domains 5 OS=Homo sapiens GN=ZKSCAN5 PE=1 SV=1 - [ZKSC5_HUMAN]          | 1.67  | 1 | 1  | 1  | 1   |      |      |      |      | 0.95 | 0.83 | 1.13  | 1.00  | 839  | 96.8  | 7.56 |
| Q8WW38 | Zinc finger protein ZFPM2 OS=Homo sapiens GN=ZFPM2 PE=1 SV=3 - [FOG2_HUMAN]                                    | 1.48  | 1 | 1  | 1  | 2   | 1.16 | 1.08 | 1.16 | 1.08 |      | 1151 | 128.1 | 6.47  |      |       |      |
| Q9H040 | Zinc finger RAD18 domain-containing protein C1orf124 OS=Homo sapiens GN=C1orf124 PE=1 SV=2 - [CA124_HUMAN]     | 4.70  | 1 | 1  | 1  | 3   |      |      |      |      | 1.15 | 1.23 | 1.11  | 1.19  | 489  | 55.1  | 8.15 |
| Q5FWF4 | Zinc finger Ran-binding domain-containing protein 3 OS=Homo sapiens GN=ZRANB3 PE=2 SV=2 - [ZRAB3_HUMAN]        | 1.39  | 1 | 1  | 1  | 2   | 1.76 | 1.38 | 1.26 | 1.00 |      | 1079 | 123.2 | 8.44  |      |       |      |
| Q9UPR6 | Zinc finger RNA-binding protein 2 OS=Homo sapiens GN=ZFR2 PE=2 SV=3 - [ZFR2_HUMAN]                             | 1.49  | 1 | 1  | 1  | 1   |      |      |      |      | 0.95 | 0.76 | 0.96  | 0.78  | 939  | 101.3 | 8.44 |
| Q96MP5 | Zinc finger SWIM domain-containing protein 3 OS=Homo sapiens GN=ZSWIM3 PE=1 SV=2 - [ZSWM3_HUMAN]               | 1.44  | 1 | 1  | 1  | 2   |      |      |      |      | 0.91 | 0.61 | 1.01  | 0.67  | 696  | 79.4  | 7.47 |
| Q19AV6 | Zinc finger SWIM domain-containing protein 7 OS=Homo sapiens GN=ZSWIM7 PE=1 SV=1 - [ZSWM7_HUMAN]               | 8.57  | 1 | 1  | 1  | 1   | 0.06 | 0.05 | 0.13 | 0.12 |      | 140  | 15.4  | 7.15  |      |       |      |
| A7E2V4 | Zinc finger SWIM domain-containing protein KIAA0913 OS=Homo sapiens GN=KIAA0913 PE=1 SV=1 - [K0913_HUMAN]      | 5.44  | 1 | 4  | 4  | 7   |      |      |      |      | 0.69 | 0.67 | 0.64  | 0.78  | 1837 | 197.2 | 6.80 |
| Q9UHF7 | Zinc finger transcription factor Trps1 OS=Homo sapiens GN=TRPS1 PE=1 SV=2 - [TRPS1_HUMAN]                      | 2.42  | 1 | 2  | 2  | 4   | 0.80 | 0.85 | 0.72 | 0.77 | 0.83 | 0.60 | 1281  | 141.4 | 7.58 |       |      |
| P17010 | Zinc finger X-chromosomal protein OS=Homo sapiens GN=ZFX PE=1 SV=2 - [ZFX_HUMAN]                               | 1.61  | 1 | 1  | 1  | 1   | 1.27 | 1.37 | 1.40 | 1.51 |      | 805  | 90.5  | 6.14  |      |       |      |
| P08048 | Zinc finger Y-chromosomal protein OS=Homo sapiens GN=ZFY PE=1 SV=3 - [ZFY_HUMAN]                               | 1.62  | 1 | 1  | 1  | 4   |      |      |      |      | 1.06 | 1.22 | 0.96  | 1.14  | 801  | 90.4  | 6.06 |
| O43149 | Zinc finger ZZ-type and EF-hand domain-containing protein 1 OS=Homo sapiens GN=ZZEF1 PE=1 SV=6 - [ZZEF1_HUMAN] | 0.44  | 1 | 2  | 2  | 3   |      |      |      |      | 1.43 | 1.37 | 1.28  | 1.23  | 2961 | 330.9 | 5.95 |
| Q9Y6X8 | Zinc fingers and homeoboxes protein 2 OS=Homo sapiens GN=ZHX2 PE=1 SV=1 - [ZHX2_HUMAN]                         | 1.43  | 1 | 1  | 1  | 1   | 0.32 | 0.24 | 0.25 | 0.19 |      | 837  | 92.2  | 6.86  |      |       |      |
| O14863 | Zinc transporter 4 OS=Homo sapiens GN=SLC30A4 PE=2 SV=2 - [ZNT4_HUMAN]                                         | 9.09  | 1 | 1  | 2  | 2   |      |      |      |      | 0.41 | 1.04 | 0.40  | 1.01  | 429  | 47.5  | 6.58 |
| Q6NXT4 | Zinc transporter 6 OS=Homo sapiens GN=SLC30A6 PE=1 SV=2 - [ZNT6_HUMAN]                                         | 1.30  | 1 | 1  | 1  | 3   |      |      |      |      | 1.20 | 1.39 | 0.97  | 1.12  | 461  | 51.1  | 9.16 |
| Q8NEW0 | Zinc transporter 7 OS=Homo sapiens GN=SLC30A7 PE=1 SV=1 - [ZNT7_HUMAN]                                         | 4.26  | 1 | 1  | 1  | 1   | 1.04 | 1.17 | 1.07 | 1.20 |      | 376  | 41.6  | 6.95  |      |       |      |
| Q9C0K1 | Zinc transporter ZIP8 OS=Homo sapiens GN=SLC39A8 PE=1 SV=1 - [S39A8_HUMAN]                                     | 4.35  | 1 | 1  | 1  | 1   |      |      |      |      | 1.10 | 0.83 | 1.40  | 1.05  | 460  | 49.6  | 6.09 |
| P25311 | Zinc-alpha-2-glycoprotein OS=Homo sapiens GN=AZGP1 PE=1 SV=2 - [ZA2G_HUMAN]                                    | 57.38 | 2 | 19 | 19 | 995 | 1.09 | 0.98 | 1.09 | 0.96 | 0.91 | 0.92 | 0.89  | 0.94  | 298  | 34.2  | 6.05 |
| Q12836 | Zona pellucida sperm-binding protein 4 OS=Homo sapiens GN=ZP4 PE=2 SV=1 - [ZP4_HUMAN]                          | 2.22  | 1 | 1  | 1  | 2   |      |      |      |      | 0.75 | 0.99 | 0.77  | 1.02  | 540  | 59.4  | 6.68 |
| Q9Y493 | Zonadhesin OS=Homo sapiens GN=ZAN PE=2 SV=4 - [ZAN_HUMAN]                                                      | 0.60  | 1 | 1  | 1  | 4   | 1.34 | 1.09 |      |      |      | 2812 | 305.5 | 6.11  |      |       |      |
| O60844 | Zymogen granule membrane protein 16 OS=Homo sapiens GN=ZG16 PE=1 SV=1 - [ZG16_HUMAN]                           | 10.78 | 1 | 1  | 1  | 3   |      |      |      |      | 0.92 | 1.07 | 0.97  | 1.13  | 167  | 18.2  | 9.36 |

|        |                                                                                            |       |   |    |    |     |      |      |      |      |      |      |      |      |      |      |      |      |     |      |      |
|--------|--------------------------------------------------------------------------------------------|-------|---|----|----|-----|------|------|------|------|------|------|------|------|------|------|------|------|-----|------|------|
| Q96DA0 | Zymogen granule protein 16 homolog B OS=Homo sapiens<br>GN=ZG16B PE=1 SV=3 - [ZG16B_HUMAN] | 4.33  | 1 | 1  | 1  | 3   |      |      |      |      |      |      |      |      | 2.22 | 2.18 | 0.79 | 0.77 | 208 | 22.7 | 7.39 |
| Q15942 | Zyxin OS=Homo sapiens GN=ZYX PE=1 SV=1 -<br>[ZYX_HUMAN]                                    | 31.99 | 1 | 14 | 14 | 115 | 0.40 | 0.33 | 0.48 | 0.39 | 1.06 | 1.03 | 0.91 | 0.89 | 572  | 61.2 | 6.67 |      |     |      |      |
