# Supplementary material for: Increased circulating resistin levels in early-onset breast cancer patients of normal body mass index correlate with lymph node negative involvement and longer disease free survival: a multi-center POSH cohort serum proteomics study
Source: Springer Nature journal article supplement (doi:10.1186/s13058-018-0938-6), 2018-03-22
Supplement: MOESM4 [file 15557162]

Supplementary Section 4. Differentially expressed proteins

| Accession | Description                                                                                                               | Log2<br>[117/119] | Log2<br>[118/119] | Log2<br>[117/121] | Log2<br>[118/121] | Log2<br>[114/116] | Log2<br>[114/115] | Log2<br>[113/116] | Log2<br>[113/115] | Mean iTRAQ<br>log2ratio<br>(good vs.<br>poor<br>outcome) | ttest |
|-----------|---------------------------------------------------------------------------------------------------------------------------|-------------------|-------------------|-------------------|-------------------|-------------------|-------------------|-------------------|-------------------|----------------------------------------------------------|-------|
| Q9Y5V3    | Melanoma-associated antigen D1<br>OS=Homo sapiens<br>GN=MAGED<br>1 PE=1 SV=3<br>-                                         |                   |                   |                   |                   | 3.42              | 3.90              | 3.49              | 3.98              | 3.7                                                      | 0.00  |
| O00139    | [MAGD1_HUMAN]<br>Kinesin-like protein KIF2A<br>OS=Homo sapiens<br>GN=KIF2A<br>PE=1 SV=3 -<br>[KIF2A_HUMAN]                |                   |                   |                   |                   | 3.65              | 3.23              | 3.58              | 3.16              | 3.4                                                      | 0.00  |
| Q5M9N0    | Coiled-coil domain-containing protein 158<br>OS=Homo sapiens<br>GN=CCDC15<br>8 PE=2 SV=2<br>-                             |                   |                   |                   |                   | 2.03              | 3.18              | 2.71              | 3.87              | 2.9                                                      | 0.00  |
| Q9UQ72    | [CD158_HUMAN]<br>Pregnancy-specific beta-1-glycoprotein 11<br>OS=Homo sapiens<br>GN=PSG11<br>PE=2 SV=3 -<br>[PSG11_HUMAN] | 2.68              | 3.15              | 2.65              | 3.15              | 2.80              | 2.78              | 2.76              | 2.74              | 2.8                                                      | 0.00  |
| P11464    | [PSG1_HUMAN]<br>Pregnancy-specific beta-1-glycoprotein 1<br>OS=Homo sapiens<br>GN=PSG1<br>PE=2 SV=1 -<br>[PSG1_HUMAN]     | 2.22              | 2.68              | 2.22              | 2.54              | 2.71              | 2.82              | 2.70              | 2.80              | 2.6                                                      | 0.00  |
| P00709    | Alpha-lactalbumin<br>OS=Homo sapiens<br>GN=LALBA<br>PE=1 SV=1 -<br>[LALBA_HUMAN]                                          |                   |                   |                   |                   | 3.03              | 2.30              | 2.58              | 1.84              | 2.4                                                      | 0.00  |

|        |                                                                                                                          |      |      |      |      |      |      |      |      |      |      |
|--------|--------------------------------------------------------------------------------------------------------------------------|------|------|------|------|------|------|------|------|------|------|
| P0C7Q5 | Solute carrier family 35 member G4<br>OS=Homo sapiens<br>GN=SLC35G4 PE=3 SV=1 - [S35G4_HUMAN]                            | 1.97 | 2.49 | 2.18 | 2.72 |      |      |      | 2.3  | 0.00 |      |
| Q13046 | Putative pregnancy-specific beta-1-glycoprotein 7<br>OS=Homo sapiens<br>GN=PSG7 PE=5 SV=2 - [PSG7_HUMAN]                 | 1.92 | 2.29 | 1.83 | 2.34 | 2.70 | 2.49 | 2.47 | 2.26 | 2.3  | 0.00 |
| Q5U623 | Activating transcription factor 7-interacting protein 2<br>OS=Homo sapiens<br>GN=ATF7IP2 PE=1 SV=2 - [MCAF2_HUMAN]       |      |      |      |      | 2.47 | 2.04 | 2.36 | 1.92 | 2.2  | 0.00 |
| Q8N2N9 | Ankyrin repeat domain-containing protein 36B<br>OS=Homo sapiens<br>GN=ANKRD36B PE=2 SV=4 - [AN36B_HUMAN]                 | 2.65 | 2.50 | 2.57 | 2.44 | 0.70 |      |      |      | 2.2  | 0.00 |
| O43184 | Disintegrin and metalloproteinase domain-containing protein 12<br>OS=Homo sapiens<br>GN=ADAM12 PE=1 SV=3 - [ADA12_HUMAN] | 1.61 | 1.80 | 1.70 | 1.85 | 2.57 | 2.54 | 2.42 | 2.51 | 2.1  | 0.00 |

|        |                                                                                                         |       |      |      |      |      |      |      |      |     |      |
|--------|---------------------------------------------------------------------------------------------------------|-------|------|------|------|------|------|------|------|-----|------|
| P11465 | Pregnancy-specific beta-1-glycoprotein 2 OS=Homo sapiens GN=PSG2 PE=2 SV=2 - [PSG2_HUMAN]               | -0.08 | 0.00 | 0.10 | 0.19 | 3.95 | 3.78 | 3.95 | 3.77 | 2.0 | 0.03 |
| Q8IYK4 | Procollagen galactosyltransferase 2 OS=Homo sapiens GN=GLT25D2 PE=1 SV=1 - [GT252_HUMAN]                | 1.73  | 2.06 | 1.80 | 2.12 |      |      |      |      | 1.9 | 0.00 |
| P33992 | DNA replication licensing factor MCM5 OS=Homo sapiens GN=MCM5 PE=1 SV=5 - [MCM5_HUMAN]                  | 1.18  | 2.54 | 1.12 | 2.68 |      |      |      |      | 1.9 | 0.02 |
| Q00888 | Pregnancy-specific beta-1-glycoprotein 4 OS=Homo sapiens GN=PSG4 PE=2 SV=3 - [PSG4_HUMAN]               | 1.31  | 1.84 | 1.22 | 1.66 | 2.38 | 2.12 | 2.33 | 2.06 | 1.9 | 0.00 |
| Q9Y4C4 | Malignant fibrous histiocytoma-amplified sequence 1 OS=Homo sapiens GN=MFHAS1 PE=1 SV=2 - [MFHA1_HUMAN] |       |      |      |      | 2.20 | 1.76 | 1.89 | 1.45 | 1.8 | 0.00 |
| Q15238 | Pregnancy-specific beta-1-glycoprotein 5 OS=Homo sapiens GN=PSG5 PE=1 SV=3 - [PSG5_HUMAN]               | 1.78  | 2.14 | 1.79 | 2.10 | 1.70 | 1.68 | 1.66 | 1.63 | 1.8 | 0.00 |

|        |                                                                                                    |      |      |       |      |      |      |      |      |      |      |
|--------|----------------------------------------------------------------------------------------------------|------|------|-------|------|------|------|------|------|------|------|
| Q13219 | Pappalysin-1<br>OS=Homo sapiens<br>GN=PAPPA<br>PE=1 SV=3 - [PAPP1_HUMAN]                           | 1.41 | 1.97 | 1.57  | 1.99 |      |      |      | 1.7  | 0.00 |      |
| Q00887 | Pregnancy-specific beta-1-glycoprotein 9<br>OS=Homo sapiens<br>GN=PSG9<br>PE=2 SV=2 - [PSG9_HUMAN] | 1.24 | 1.48 | 1.23  | 1.48 | 1.87 | 1.78 | 1.68 | 1.59 | 1.5  | 0.00 |
| P01215 | Glycoprotein hormones alpha chain<br>OS=Homo sapiens<br>GN=CGA<br>PE=1 SV=1 - [GLHA_HUMAN]         |      |      |       |      | 1.55 | 1.58 | 1.47 | 1.49 | 1.5  | 0.00 |
| P01243 | Chorionic somatomamotropin hormone<br>OS=Homo sapiens<br>GN=CSH1<br>PE=1 SV=2 - [CSH_HUMAN]        |      |      |       |      | 1.11 | 1.78 | 1.22 | 1.85 | 1.5  | 0.00 |
| Q16643 | Drebrin<br>OS=Homo sapiens<br>GN=DBN1<br>PE=1 SV=4 - [DREB_HUMAN]                                  |      |      |       |      | 1.46 | 1.52 | 1.45 | 1.50 | 1.5  | 0.00 |
| Q9HD67 | Unconventional myosin-X<br>OS=Homo sapiens<br>GN=MYO10<br>PE=1 SV=3 - [MYO10_HUMAN]                | 1.27 | 1.48 | 1.43  | 1.65 |      |      |      |      | 1.5  | 0.00 |
| Q7Z2Z1 | Treslin<br>OS=Homo sapiens<br>GN=TICRR<br>PE=1 SV=2 - [TICRR_HUMAN]                                | 0.13 | 0.30 | -0.01 | 0.17 | 2.53 | 2.66 | 2.54 | 2.67 | 1.4  | 0.02 |
| Q9NT68 | Teneurin-2<br>OS=Homo sapiens<br>GN=ODZ2<br>PE=1 SV=3 - [TEN2_HUMAN]                               |      |      |       |      | 1.40 | 1.56 | 1.15 | 1.30 | 1.4  | 0.00 |

|        |                                                                                                              |      |       |      |       |      |      |      |      |     |      |
|--------|--------------------------------------------------------------------------------------------------------------|------|-------|------|-------|------|------|------|------|-----|------|
| P60985 | Keratinocyte differentiation-associated protein<br>OS=Homo sapiens<br>GN=KRTDAP<br>PE=1 SV=1 - [KTDAP_HUMAN] |      |       |      |       | 1.37 | 1.36 | 1.30 | 1.29 | 1.3 | 0.00 |
| Q8IVL6 | Prolyl 3-hydroxylase 3<br>OS=Homo sapiens<br>GN=LEPREL<br>2 PE=2 SV=1 - [P3H3_HUMAN]                         |      |       |      |       | 1.25 | 1.30 | 1.36 | 1.41 | 1.3 | 0.00 |
| Q8N2C7 | Protein unc-80 homolog<br>OS=Homo sapiens<br>GN=UNC80<br>PE=2 SV=2 - [UNC80_HUMAN]                           | 1.25 | 1.38  | 1.20 | 1.33  |      |      |      |      | 1.3 | 0.00 |
| P51784 | Ubiquitin carboxyl-terminal hydrolase 11<br>OS=Homo sapiens<br>GN=USP11<br>PE=1 SV=3 - [UBP11_HUMAN]         | 0.01 | -0.21 | 0.17 | -0.04 | 1.97 | 2.59 | 2.51 | 3.13 | 1.3 | 0.04 |
| Q9NYQ8 | Protocadherin Fat 2<br>OS=Homo sapiens<br>GN=FAT2<br>PE=1 SV=2 - [FAT2_HUMAN]                                | 0.53 | 0.56  | 0.47 | 0.50  | 2.09 | 1.96 | 2.08 | 1.95 | 1.3 | 0.00 |
| Q96BM9 | ADP-ribosylation factor-like protein 8A<br>OS=Homo sapiens<br>GN=ARL8A<br>PE=1 SV=1 - [ARL8A_HUMAN]          |      |       |      |       | 1.46 | 1.07 | 1.41 | 1.03 | 1.2 | 0.00 |
| P52566 | Rho GDP-dissociation inhibitor 2<br>OS=Homo sapiens<br>GN=ARHGDI<br>B PE=1 SV=3 - [GDIR2_HUMAN]              |      |       |      |       | 1.40 | 1.14 | 1.32 | 1.08 | 1.2 | 0.00 |

|        |                                                                                                                                                      |      |      |      |      |      |      |      |      |     |      |
|--------|------------------------------------------------------------------------------------------------------------------------------------------------------|------|------|------|------|------|------|------|------|-----|------|
| Q9HCM1 | Uncharacterized protein<br>C12orf35<br>OS=Homo sapiens<br>GN=C12orf35<br>PE=1 SV=3<br>-                                                              |      |      |      |      | 1.58 | 1.45 | 1.01 | 0.80 | 1.2 | 0.01 |
| P15170 | [CL035_HUMAN]<br>Eukaryotic peptide chain release factor<br>GTP-binding subunit<br>ERF3A<br>OS=Homo sapiens<br>GN=GSPT1<br>PE=1 SV=1 - [ERF3A_HUMAN] |      |      |      |      | 1.18 | 1.18 | 1.18 | 1.18 | 1.2 | 0.00 |
| Q07654 | Trefoil factor 3<br>OS=Homo sapiens<br>GN=TFF3<br>PE=1 SV=1 - [TFF3_HUMAN]                                                                           |      |      |      |      | 1.13 | 1.26 | 1.06 | 1.19 | 1.2 | 0.00 |
| P46379 | Large proline-rich protein<br>BAG6<br>OS=Homo sapiens<br>GN=BAG6<br>PE=1 SV=2 - [BAG6_HUMAN]                                                         | 1.14 | 1.32 | 1.16 | 1.35 | 0.70 | 0.77 | 1.36 | 1.42 | 1.2 | 0.00 |
| P80511 | Protein S100-A12<br>OS=Homo sapiens<br>GN=S100A12<br>PE=1 SV=2<br>-                                                                                  |      |      |      |      | 1.22 | 1.22 | 1.09 | 1.05 | 1.1 | 0.00 |
| Q9HBJ7 | [S10AC_HUMAN]<br>Ubiquitin carboxyl-terminal hydrolase 29<br>OS=Homo sapiens<br>GN=USP29<br>PE=2 SV=1 - [UBP29_HUMAN]                                | 1.09 | 1.07 | 1.20 | 1.18 |      |      |      |      | 1.1 | 0.00 |

|        |                                                                                                    |       |      |      |      |      |       |       |       |     |      |
|--------|----------------------------------------------------------------------------------------------------|-------|------|------|------|------|-------|-------|-------|-----|------|
| Q16557 | Pregnancy-specific beta-1-glycoprotein 3<br>OS=Homo sapiens<br>GN=PSG3<br>PE=2 SV=2 - [PSG3_HUMAN] | 2.13  | 2.40 | 2.34 | 2.63 | 0.28 | -0.12 | -0.09 | -0.50 | 1.1 | 0.05 |
| Q9BV23 | Monoacylglycerol lipase<br>ABHD6<br>OS=Homo sapiens<br>GN=ABHD6<br>PE=2 SV=1 - [ABHD6_HUMAN]       | 0.28  | 0.48 | 0.41 | 0.61 | 1.87 | 2.06  | 1.59  | 1.77  | 1.1 | 0.00 |
| Q0ZGT2 | Nexilin<br>OS=Homo sapiens<br>GN=NEXN<br>PE=1 SV=1 - [NEXN_HUMAN]                                  |       |      |      |      | 1.16 | 1.12  | 1.12  | 1.01  | 1.1 | 0.00 |
| A6NMZ7 | Collagen alpha-6(VI) chain<br>OS=Homo sapiens<br>GN=COL6A6<br>PE=1 SV=2 - [CO6A6_HUMAN]            | -0.08 | 0.18 | 0.03 | 0.31 | 0.65 | 2.47  | 1.61  | 3.42  | 1.1 | 0.05 |
| O43790 | Keratin, type II cuticular<br>Hb6<br>OS=Homo sapiens<br>GN=KRT86<br>PE=1 SV=1 - [KRT86_HUMAN]      | 1.05  | 0.82 | 0.94 | 0.72 | 1.81 | 1.72  | 0.75  | 0.65  | 1.1 | 0.00 |
| Q5M775 | Cytospin-B<br>OS=Homo sapiens<br>GN=SPECC1<br>PE=1 SV=1 - [CYTSB_HUMAN]                            |       |      |      |      | 1.26 | 0.98  | 1.12  | 0.85  | 1.1 | 0.00 |
| P13727 | Bone marrow proteoglycan<br>OS=Homo sapiens<br>GN=PRG2<br>PE=1 SV=2 - [PRG2_HUMAN]                 | 1.20  | 1.32 | 1.21 | 1.35 | 0.59 | 0.91  | 0.73  | 0.99  | 1.0 | 0.00 |

|        |                                                                                                      |      |      |      |      |      |      |      |      |     |      |
|--------|------------------------------------------------------------------------------------------------------|------|------|------|------|------|------|------|------|-----|------|
| Q8IV33 | Uncharacterized protein KIAA0825 OS=Homo sapiens GN=KIAA0825 PE=2 SV=2 - [K0825_HUMAN]               | 1.99 | 1.86 | 1.97 | 1.84 | 0.34 | 0.17 | 0.03 | 0.08 | 1.0 | 0.02 |
| Q92973 | Transportin-1 OS=Homo sapiens GN=TNPO1 PE=1 SV=2 - [TNPO1_HUMAN]                                     | 0.95 | 1.10 | 0.91 | 1.06 |      |      |      |      | 1.0 | 0.00 |
| P62328 | Thymosin beta-4 OS=Homo sapiens GN=TMSB4X PE=1 SV=2 - [TYB4_HUMAN]                                   |      |      |      |      | 1.02 | 0.99 | 0.95 | 0.96 | 1.0 | 0.00 |
| Q9UPQ9 | Trinucleotide repeat-containing gene 6B protein OS=Homo sapiens GN=TNRC6B PE=1 SV=4 - [TNR6B_HUMAN]  | 0.45 | 0.49 | 0.46 | 0.51 | 0.85 | 1.67 | 1.26 | 2.09 | 1.0 | 0.00 |
| Q5SQ80 | Ankyrin repeat domain-containing protein 20A2 OS=Homo sapiens GN=ANKRD20A2 PE=2 SV=1 - [A20A2_HUMAN] |      |      |      |      | 1.11 | 0.95 | 0.93 | 0.77 | 0.9 | 0.00 |
| Q7RTS9 | Dymeclin OS=Homo sapiens GN=DYM PE=1 SV=1 - [DYM_HUMAN]                                              | 0.81 | 1.02 | 0.86 | 1.07 |      |      |      |      | 0.9 | 0.00 |
| A5D8W1 | Uncharacterized protein C7orf63 OS=Homo sapiens GN=C7orf63 PE=2 SV=3 - [CG063_HUMAN]                 |      |      |      |      | 1.00 | 1.29 | 0.59 | 0.87 | 0.9 | 0.01 |



|        |                                                                                                                  |      |       |      |       |      |      |      |      |     |      |
|--------|------------------------------------------------------------------------------------------------------------------|------|-------|------|-------|------|------|------|------|-----|------|
| Q15149 | Plectin<br>OS=Homo sapiens<br>GN=PLEC<br>PE=1 SV=3 - [PLEC_HUMAN]                                                | 0.89 | 0.86  | 0.72 | 0.69  | 1.21 | 0.88 | 1.20 | 0.87 | 0.9 | 0.00 |
| Q13085 | Acetyl-CoA carboxylase 1<br>OS=Homo sapiens<br>GN=ACACA<br>PE=1 SV=2 - [ACACA_HUMAN]                             | 0.09 | -0.14 | 0.05 | -0.15 | 1.99 | 1.71 | 2.00 | 1.69 | 0.9 | 0.04 |
| Q8WXA3 | RUN and FYVE domain containing protein 2<br>OS=Homo sapiens<br>GN=RUFY2<br>PE=1 SV=2 - [RUFY2_HUMAN]             | 0.32 | 0.50  | 0.28 | 0.47  | 1.38 | 1.51 | 1.28 | 1.41 | 0.9 | 0.00 |
| P04085 | Platelet-derived growth factor subunit A<br>OS=Homo sapiens<br>GN=PDGFA<br>PE=1 SV=1 - [PDGFA_HUMAN]             |      |       |      |       | 0.91 | 0.87 | 0.92 | 0.88 | 0.9 | 0.00 |
| Q9UPY3 | Endoribonuclease Dicer<br>OS=Homo sapiens<br>GN=DICER1<br>PE=1 SV=3 - [DICER_HUMAN]                              | 0.72 | 0.76  | 1.01 | 1.05  |      |      |      |      | 0.9 | 0.00 |
| P51692 | Signal transducer and activator of transcription 5B<br>OS=Homo sapiens<br>GN=STAT5B<br>PE=1 SV=2 - [STA5B_HUMAN] |      |       |      |       | 0.98 | 1.04 | 0.72 | 0.78 | 0.9 | 0.00 |

|        |                                                                                                                                                |      |      |      |      |      |      |      |      |     |      |
|--------|------------------------------------------------------------------------------------------------------------------------------------------------|------|------|------|------|------|------|------|------|-----|------|
| Q4LDE5 | Sushi, von Willebrand factor type A, EGF and pentraxin domain-containing protein 1<br>OS=Homo sapiens<br>GN=SVEP1<br>PE=1 SV=3 - [SVEP1_HUMAN] | 0.75 | 0.72 | 0.69 | 0.68 | 0.84 | 1.14 | 0.89 | 1.18 | 0.9 | 0.00 |
| Q5VST9 | Obscurin<br>OS=Homo sapiens<br>GN=OBSCN<br>PE=1 SV=3 - [OBSCN_HUMAN]                                                                           | 0.33 | 0.91 | 0.47 | 1.06 | 1.10 | 1.09 | 0.87 | 0.86 | 0.8 | 0.00 |
| O00462 | Beta-mannosidase<br>OS=Homo sapiens<br>GN=MANBA<br>PE=1 SV=3 - [MANBA_HUMAN]                                                                   | 0.54 | 0.63 | 0.62 | 0.72 | 1.04 | 1.07 | 1.00 | 1.03 | 0.8 | 0.00 |
| Q05682 | Caldesmon<br>OS=Homo sapiens<br>GN=CALD1<br>PE=1 SV=3 - [CALD1_HUMAN]                                                                          |      |      |      |      | 0.85 | 0.79 | 0.85 | 0.81 | 0.8 | 0.00 |
| Q6ZU35 | Uncharacterized protein KIAA1211<br>OS=Homo sapiens<br>GN=KIAA1211<br>PE=1 SV=3 - [K1211_HUMAN]                                                |      |      |      |      | 0.82 | 0.89 | 0.75 | 0.82 | 0.8 | 0.00 |
| P29973 | cGMP-gated cation channel alpha-1<br>OS=Homo sapiens<br>GN=CNGA1<br>PE=1 SV=3 - [CNGA1_HUMAN]                                                  | 0.71 | 0.79 | 0.83 | 0.86 |      |      |      |      | 0.8 | 0.00 |
| P11678 | Eosinophil peroxidase<br>OS=Homo sapiens<br>GN=EPX<br>PE=1 SV=2 - [PERE_HUMAN]                                                                 | 0.75 | 0.88 | 0.71 | 0.82 |      |      |      |      | 0.8 | 0.00 |

|        |                                                                                                                   |      |      |      |      |      |      |      |      |     |      |
|--------|-------------------------------------------------------------------------------------------------------------------|------|------|------|------|------|------|------|------|-----|------|
| Q9UBC2 | Epidermal growth factor receptor substrate 15-like 1<br>OS=Homo sapiens<br>GN=EPS15L1 PE=1 SV=1<br>-[EP15R_HUMAN] | 0.89 | 0.64 | 0.24 | 0.00 | 1.30 | 1.16 | 1.09 | 0.95 | 0.8 | 0.00 |
| P20742 | Pregnancy zone protein<br>OS=Homo sapiens<br>GN=PZP PE=1 SV=4<br>-[PZP_HUMAN]                                     | 0.78 | 0.74 | 0.76 | 0.77 | 0.82 | 0.88 | 0.65 | 0.78 | 0.8 | 0.00 |
| P05787 | Keratin, type II cytoskeletal 8<br>OS=Homo sapiens<br>GN=KRT8 PE=1 SV=7<br>-[K2C8_HUMAN]                          |      |      |      |      | 0.93 | 0.47 | 1.05 | 0.59 | 0.8 | 0.01 |
| Q9H7C9 | UPF0366 protein C11orf67<br>OS=Homo sapiens<br>GN=C11orf67 PE=1 SV=1<br>-[CK067_HUMAN]                            |      |      |      |      | 0.69 | 0.81 | 0.68 | 0.80 | 0.7 | 0.00 |
| Q5SZK8 | FRAS1-related extracellular matrix protein 2<br>OS=Homo sapiens<br>GN=FREM2 PE=1 SV=2<br>-[FREM2_HUMAN]           | 0.75 | 0.50 | 0.98 | 0.74 |      |      |      |      | 0.7 | 0.00 |
| Q9C0G6 | Dynein heavy chain 6, axonemal<br>OS=Homo sapiens<br>GN=DNAH6 PE=1 SV=3<br>-[DYH6_HUMAN]                          | 1.25 | 1.19 | 1.31 | 1.27 | 0.31 | 0.24 | 0.20 | 0.13 | 0.7 | 0.01 |
| Q6ZMZ3 | Nesprin-3<br>OS=Homo sapiens<br>GN=C14orf49 PE=1 SV=2<br>-[SYNE3_HUMAN]                                           |      |      |      |      | 0.86 | 0.72 | 0.74 | 0.61 | 0.7 | 0.00 |

|        |                                                                                                          |      |      |      |      |      |      |      |      |      |      |
|--------|----------------------------------------------------------------------------------------------------------|------|------|------|------|------|------|------|------|------|------|
| O75962 | Triple functional domain protein<br>OS=Homo sapiens<br>GN=TRIO<br>PE=1 SV=2 - [TRIO_HUMAN]               | 0.56 | 0.75 | 0.72 | 0.91 |      |      |      | 0.7  | 0.00 |      |
| O95274 | Ly6/PLAUR domain-containing protein 3<br>OS=Homo sapiens<br>GN=LYPD3<br>PE=1 SV=2 - [LYPD3_HUMAN]        | 0.78 | 0.65 | 0.79 | 0.67 |      |      |      | 0.7  | 0.00 |      |
| Q86UQ4 | ATP-binding cassette sub-family A member 13<br>OS=Homo sapiens<br>GN=ABCA13<br>PE=2 SV=3 - [ABCAD_HUMAN] |      |      |      |      | 0.60 | 1.02 | 0.42 | 0.83 | 0.7  | 0.01 |
| Q9Y287 | Integral membrane protein 2B<br>OS=Homo sapiens<br>GN=ITM2B<br>PE=1 SV=1 - [ITM2B_HUMAN]                 |      |      |      |      | 0.89 | 0.70 | 0.72 | 0.53 | 0.7  | 0.00 |
| Q13099 | Intraflagellar transport protein 88 homolog<br>OS=Homo sapiens<br>GN=IFT88<br>PE=2 SV=2 - [IFT88_HUMAN]  | 0.67 | 0.70 | 0.71 | 0.75 |      |      |      |      | 0.7  | 0.00 |
| Q9HCC9 | Lateral signaling target protein 2 homolog<br>OS=Homo sapiens<br>GN=ZFYVE28<br>PE=1 SV=3 - [LST2_HUMAN]  |      |      |      |      | 0.68 |      | 0.74 |      | 0.7  | 0.03 |

|        |                                                                                                                       |      |      |      |      |      |      |      |      |     |      |
|--------|-----------------------------------------------------------------------------------------------------------------------|------|------|------|------|------|------|------|------|-----|------|
| Q13360 | Zinc finger protein 177<br>OS=Homo sapiens<br>GN=ZNF177<br>PE=2 SV=3 - [ZN177_HUMAN]                                  |      |      |      |      | 1.02 | 0.46 | 0.95 | 0.39 | 0.7 | 0.02 |
| Q7Z3S7 | Voltage-dependent calcium channel subunit alpha-2/delta-4<br>OS=Homo sapiens<br>GN=CACNA2D4 PE=1 SV=2 - [CA2D4_HUMAN] | 0.87 | 0.60 | 0.81 | 0.54 |      |      |      |      | 0.7 | 0.00 |
| P06753 | Tropomyosin alpha-3 chain<br>OS=Homo sapiens<br>GN=TPM3<br>PE=1 SV=1 - [TPM3_HUMAN]                                   | 0.25 | 0.00 | 0.80 | 0.56 | 1.03 | 1.09 | 0.91 | 0.97 | 0.7 | 0.00 |
| Q8IYT3 | Coiled-coil domain-containing protein C6orf97<br>OS=Homo sapiens<br>GN=C6orf97<br>PE=2 SV=3 - [CF097_HUMAN]           | 0.43 | 0.49 | 0.56 | 0.62 | 0.83 | 1.07 | 0.68 | 0.92 | 0.7 | 0.00 |
| Q12840 | Kinesin heavy chain isoform 5A<br>OS=Homo sapiens<br>GN=KIF5A<br>PE=1 SV=2 - [KIF5A_HUMAN]                            |      |      |      |      | 0.78 | 0.75 | 0.65 | 0.61 | 0.7 | 0.00 |
| Q07092 | Collagen alpha-1(XVI) chain<br>OS=Homo sapiens<br>GN=COL16A1 PE=1 SV=2 - [COGA1_HUMAN]                                |      |      |      |      | 1.01 | 0.86 | 0.52 | 0.37 | 0.7 | 0.02 |

|        |                                                                                                           |      |      |      |      |      |      |      |      |      |      |
|--------|-----------------------------------------------------------------------------------------------------------|------|------|------|------|------|------|------|------|------|------|
| Q13111 | Chromatin assembly factor 1 subunit A<br>OS=Homo sapiens<br>GN=CHAF1A<br>PE=1 SV=2 - [CAF1A_HUMAN]        | 0.57 | 0.82 | 0.55 | 0.80 |      |      |      | 0.7  | 0.00 |      |
| P04278 | Sex hormone-binding globulin<br>OS=Homo sapiens<br>GN=SHBG<br>PE=1 SV=2 - [SHBG_HUMAN]                    | 0.87 | 0.92 | 0.78 | 0.85 | 0.47 | 0.59 | 0.44 | 0.56 | 0.7  | 0.00 |
| Q9NZN5 | Rho guanine nucleotide exchange factor 12<br>OS=Homo sapiens<br>GN=ARHGEF12<br>PE=1 SV=1 - [ARHGE_HUMAN]  | 0.36 | 0.86 | 0.50 | 1.01 | 0.51 | 0.91 | 0.43 | 0.83 | 0.7  | 0.00 |
| Q05469 | Hormone-sensitive lipase<br>OS=Homo sapiens<br>GN=LIPE<br>PE=1 SV=4 - [LIPS_HUMAN]                        |      |      |      |      | 0.73 | 0.59 | 0.73 | 0.59 | 0.7  | 0.00 |
| Q9UHN1 | DNA polymerase subunit gamma-2, mitochondrial<br>OS=Homo sapiens<br>GN=POLG2<br>PE=1 SV=1 - [DPOG2_HUMAN] |      |      |      |      | 0.73 | 0.62 | 0.69 | 0.58 | 0.7  | 0.00 |
| Q9BY66 | Lysine-specific demethylase 5D<br>OS=Homo sapiens<br>GN=KDM5D<br>PE=1 SV=2 - [KDM5D_HUMAN]                | 0.57 | 0.68 | 0.61 | 0.72 |      |      |      |      | 0.6  | 0.00 |

|        |                                                                                         |       |      |       |      |      |      |      |      |     |      |
|--------|-----------------------------------------------------------------------------------------|-------|------|-------|------|------|------|------|------|-----|------|
| Q2M1V0 | Intestine-specific homeobox OS=Homo sapiens GN=ISX PE=2 SV=2 - [ISX_HUMAN1]             | 0.06  | 0.22 | 0.01  | 0.19 | 1.00 | 1.27 | 1.06 | 1.32 | 0.6 | 0.02 |
| Q96PL1 | Secretoglobin family 3A member 2 OS=Homo sapiens GN=SCGB3A2 PE=1 SV=1 - [SG3A2_HUMAN]   | 0.61  | 0.72 | 0.55  | 0.66 |      |      |      |      | 0.6 | 0.00 |
| P09960 | Leukotriene A <sub>4</sub> hydrolase OS=Homo sapiens GN=LTA4H PE=1 SV=2 - [LKHA4_HUMAN] | 0.65  | 0.64 | 0.62  | 0.61 |      |      |      |      | 0.6 | 0.00 |
| Q13724 | Mannosyl-oligosaccharide glucosidase OS=Homo sapiens GN=MOGS PE=1 SV=5 - [MOGS_HUMAN]   | 0.17  | 0.16 | 0.25  | 0.24 | 1.08 | 1.14 | 0.96 | 1.02 | 0.6 | 0.01 |
| P55056 | Apolipoprotein C-IV OS=Homo sapiens GN=APOC4 PE=1 SV=1 - [APOC4_HUMAN]                  | 0.14  | 0.16 | 0.26  | 0.29 | 1.11 | 1.08 | 0.92 | 1.02 | 0.6 | 0.01 |
| Q14008 | Cytoskeleton-associated protein 5 OS=Homo sapiens GN=CKAP5 PE=1 SV=3 - [CKAP5_HUMAN]    | -0.11 | 0.26 | -0.37 | 0.02 | 1.20 | 1.60 | 1.02 | 1.36 | 0.6 | 0.05 |
| P02730 | Band 3 anion transport protein OS=Homo sapiens GN=SLC4A1 PE=1 SV=3 - [B3AT_HUMAN]       | 0.67  | 0.73 | 0.48  | 0.58 |      |      |      |      | 0.6 | 0.00 |

|        |                                                                                         |      |      |      |       |      |      |      |      |     |      |
|--------|-----------------------------------------------------------------------------------------|------|------|------|-------|------|------|------|------|-----|------|
| Q7RTZ1 | Ovochymase-2 OS=Homo sapiens<br>GN=OVCH2<br>PE=1 SV=2 - [OVCH2_HUMAN]                   | 1.73 | 1.08 | 0.36 | -0.10 | 0.23 | 0.52 | 0.37 | 0.73 | 0.6 | 0.02 |
| P12724 | Eosinophil cationic protein OS=Homo sapiens<br>GN=RNASE3<br>PE=1 SV=2 - [ECP_HUMAN]     |      |      |      |       | 0.67 | 0.58 | 0.63 | 0.55 | 0.6 | 0.00 |
| Q00534 | Cyclin-dependent kinase 6 OS=Homo sapiens<br>GN=CDK6<br>PE=1 SV=1 - [CDK6_HUMAN]        |      |      |      |       | 0.80 | 0.70 | 0.51 | 0.41 | 0.6 | 0.01 |
| Q92545 | Transmembrane protein 131 OS=Homo sapiens<br>GN=TMEM131<br>PE=1 SV=3 - [TM131_HUMAN]    | 0.50 | 0.49 | 0.71 | 0.71  |      |      |      |      | 0.6 | 0.00 |
| P17482 | Homeobox protein Hox-B9 OS=Homo sapiens<br>GN=HOXB9<br>PE=1 SV=2 - [HXB9_HUMAN]         | 0.66 | 0.88 | 0.78 | 1.02  | 0.48 | 0.36 | 0.38 | 0.26 | 0.6 | 0.00 |
| P42685 | Tyrosine-protein kinase FRK OS=Homo sapiens<br>GN=FRK<br>PE=1 SV=1 - [FRK_HUMAN]        | 0.60 | 0.54 | 0.70 | 0.66  | 0.63 | 0.47 | 0.64 | 0.47 | 0.6 | 0.00 |
| O15360 | Fanconi anemia group A protein OS=Homo sapiens<br>GN=FANCA<br>PE=1 SV=2 - [FANCA_HUMAN] | 0.30 | 0.67 | 0.33 | 0.71  | 0.78 | 0.59 | 0.76 | 0.57 | 0.6 | 0.00 |



|        |                                                                                                                |      |      |      |      |      |       |      |      |     |      |
|--------|----------------------------------------------------------------------------------------------------------------|------|------|------|------|------|-------|------|------|-----|------|
| Q9Y251 | Heparanase<br>OS=Homo sapiens<br>GN=HPSE<br>PE=1 SV=2 - [HPSE_HUMAN]                                           | 0.28 | 0.36 | 0.30 | 0.37 | 0.98 | 0.86  | 0.83 | 0.71 | 0.6 | 0.00 |
| Q32MH5 | Protein FAM214A<br>OS=Homo sapiens<br>GN=FAM214A<br>PE=2 SV=2 - [F214A_HUMAN]                                  | 1.64 | 0.98 | 1.20 | 0.55 | 0.17 | -0.01 | 0.11 | 0.06 | 0.6 | 0.03 |
| Q9NR34 | Mannosyl-oligosaccharide 1,2-alpha-mannosidase<br>IC OS=Homo sapiens<br>GN=MAN1C1<br>PE=1 SV=1 - [MA1C1_HUMAN] | 0.78 | 0.81 | 0.69 | 0.72 | 0.29 | 0.68  | 0.14 | 0.53 | 0.6 | 0.00 |
| Q7Z460 | CLIP-associating protein 1<br>OS=Homo sapiens<br>GN=CLASP1<br>PE=1 SV=1 - [CLAP1_HUMAN]                        | 0.91 | 0.46 | 0.69 | 0.26 |      |       |      |      | 0.6 | 0.03 |
| Q08ET2 | Sialic acid-binding Ig-like lectin 14<br>OS=Homo sapiens<br>GN=SIGLEC14<br>PE=1 SV=1 - [SIG14_HUMAN]           | 0.90 | 0.69 | 0.79 | 0.59 | 0.21 | 0.54  | 0.29 | 0.62 | 0.6 | 0.00 |
| Q2M1K9 | Zinc finger protein 423<br>OS=Homo sapiens<br>GN=ZNF423<br>PE=1 SV=1 - [ZN423_HUMAN]                           | 1.00 | 1.11 | 1.09 | 1.21 | 0.03 | -0.01 | 0.09 | 0.04 | 0.6 | 0.03 |

|        |                                                                                                                             |       |       |       |      |      |      |      |      |     |      |
|--------|-----------------------------------------------------------------------------------------------------------------------------|-------|-------|-------|------|------|------|------|------|-----|------|
| Q6ZQN7 | Solute carrier organic anion transporter family member 4C1<br>OS=Homo sapiens<br>GN=SLCO4C1 PE=1 SV=1<br>-<br>[SO4C1_HUMAN] | 0.61  | 0.63  | 0.50  | 0.52 |      |      |      |      | 0.6 | 0.00 |
| Q9UJ42 | Probable G-protein coupled receptor 160<br>OS=Homo sapiens<br>GN=GPR160 PE=2 SV=1<br>-<br>[GP160_HUMAN]                     | -0.09 | -0.02 | -0.03 | 0.05 | 1.02 | 1.42 | 0.87 | 1.27 | 0.6 | 0.04 |
| P05451 | Lithostathine-1-alpha<br>OS=Homo sapiens<br>GN=REG1A PE=1 SV=3<br>-<br>[REG1A_HUMAN]                                        |       |       |       |      | 0.67 | 0.60 | 0.53 | 0.45 | 0.6 | 0.00 |
| Q9Y275 | Tumor necrosis factor ligand superfamily member 13B<br>OS=Homo sapiens<br>GN=TNFSF13B PE=1 SV=1<br>-<br>[TN13B_HUMAN]       |       |       |       |      | 0.57 | 0.61 | 0.52 | 0.54 | 0.6 | 0.00 |
| O75410 | Transforming acidic coiled-coil-containing protein 1<br>OS=Homo sapiens<br>GN=TACC1 PE=1 SV=2<br>-<br>[TACC1_HUMAN]         |       |       |       |      | 0.66 | 0.64 | 0.48 | 0.46 | 0.6 | 0.00 |

|        |                                                                                                          |      |      |      |      |      |      |       |      |     |      |
|--------|----------------------------------------------------------------------------------------------------------|------|------|------|------|------|------|-------|------|-----|------|
| P01602 | Ig kappa chain V-I region HK102 (Fragment)<br>OS=Homo sapiens<br>GN=IGKV1-5<br>PE=4 SV=1 - [KV110_HUMAN] | 0.42 | 0.55 | 0.33 | 0.47 | 0.88 | 0.66 | 0.67  | 0.45 | 0.6 | 0.00 |
| Q8TDW7 | Protocadherin Fat 3<br>OS=Homo sapiens<br>GN=FAT3<br>PE=2 SV=2 - [FAT3_HUMAN]                            | 0.47 | 0.48 | 0.53 | 0.54 | 0.74 | 0.60 | 0.60  | 0.46 | 0.6 | 0.00 |
| Q9BQG0 | Myb-binding protein 1A<br>OS=Homo sapiens<br>GN=MYBBP1A<br>PE=1 SV=2 - [MBB1A_HUMAN]                     | 0.37 | 0.33 | 0.54 | 0.50 | 0.91 | 0.09 | 1.22  | 0.40 | 0.5 | 0.00 |
| Q15643 | Thyroid receptor-interacting protein 11<br>OS=Homo sapiens<br>GN=TRIP11<br>PE=1 SV=3 - [TRIPB_HUMAN]     | 0.85 | 1.28 | 0.20 | 0.64 | 0.37 | 0.37 | 0.34  | 0.31 | 0.5 | 0.00 |
| P01593 | Ig kappa chain V-I region AG<br>OS=Homo sapiens<br>GN=IGKV1-5<br>PE=1 SV=1 - [KV101_HUMAN]               | 0.88 | 0.63 | 0.62 | 0.37 | 0.47 | 0.61 | 0.32  | 0.46 | 0.5 | 0.00 |
| P54840 | Glycogen [starch] synthase, liver<br>OS=Homo sapiens<br>GN=GYS2<br>PE=1 SV=2 - [GYS2_HUMAN]              | 0.46 | 0.47 | 0.15 | 0.16 | 0.29 | 0.87 | 0.64  | 1.22 | 0.5 | 0.00 |
| A6NHA9 | Olfactory receptor 4C46<br>OS=Homo sapiens<br>GN=OR4C46<br>PE=2 SV=1 - [O4C46_HUMAN]                     | 0.69 | 0.87 | 0.90 | 1.10 | 0.09 | 0.39 | -0.06 | 0.24 | 0.5 | 0.01 |

|        |                                                                                                                |      |      |      |      |      |      |      |      |     |      |
|--------|----------------------------------------------------------------------------------------------------------------|------|------|------|------|------|------|------|------|-----|------|
| P26885 | Peptidyl-prolyl cis-trans isomerase FKBP2<br>OS=Homo sapiens<br>GN=FKBP2<br>PE=1 SV=2 - [FKBP2_HUMAN]          |      |      |      |      | 0.58 | 0.64 | 0.47 | 0.43 | 0.5 | 0.00 |
| A6NC98 | Coiled-coil domain-containing protein 88B<br>OS=Homo sapiens<br>GN=CCDC88<br>B PE=1<br>SV=1 - [CC88B_HUMAN]    | 0.33 | 0.52 | 0.53 | 0.72 |      |      |      |      | 0.5 | 0.01 |
| Q6NSJ2 | Pleckstrin homology-like domain family B member 3<br>OS=Homo sapiens<br>GN=PHLDB3<br>PE=2 SV=3 - [PHLB3_HUMAN] | 0.47 | 0.52 | 0.52 | 0.57 |      |      |      |      | 0.5 | 0.00 |
| A0M8Q6 | Ig lambda-7 chain C region<br>OS=Homo sapiens<br>GN=IGLC7<br>PE=1 SV=2 - [LAC7_HUMAN]                          | 0.42 | 0.40 | 0.39 | 0.39 | 0.67 | 0.80 | 0.45 | 0.66 | 0.5 | 0.00 |
| P68431 | Histone H3.1<br>OS=Homo sapiens<br>GN=HIST1H3A<br>PE=1<br>SV=2 - [H31_HUMAN]                                   |      |      |      |      | 0.53 | 0.55 | 0.48 | 0.49 | 0.5 | 0.00 |
| Q86VQ0 | Lebercilin<br>OS=Homo sapiens<br>GN=LCA5<br>PE=1 SV=2 - [LCA5_HUMAN]                                           | 0.48 | 0.43 | 0.58 | 0.53 | 0.79 | 0.38 | 0.64 | 0.23 | 0.5 | 0.00 |

|        |                                                                                                                                     |      |      |      |      |      |      |      |      |     |      |
|--------|-------------------------------------------------------------------------------------------------------------------------------------|------|------|------|------|------|------|------|------|-----|------|
| Q9C0F0 | Putative Polycomb group protein ASXL3<br>OS=Homo sapiens<br>GN=ASXL3<br>PE=2 SV=3 - [ASXL3_HUMAN]                                   |      |      |      |      | 0.66 | 0.54 | 0.46 | 0.36 | 0.5 | 0.00 |
| P35625 | Metalloproteinase inhibitor 3<br>OS=Homo sapiens<br>GN=TIMP3<br>PE=1 SV=2 - [TIMP3_HUMAN]                                           |      |      |      |      | 0.52 | 0.52 | 0.48 | 0.49 | 0.5 | 0.00 |
| Q99550 | M-phase phosphoprotein 9<br>OS=Homo sapiens<br>GN=MPHOSPH9<br>PE=1 SV=3 - [MPP9_HUMAN]                                              | 0.62 | 0.26 | 0.62 | 0.50 |      |      |      |      | 0.5 | 0.01 |
| O15231 | Zinc finger protein 185<br>OS=Homo sapiens<br>GN=ZNF185<br>PE=1 SV=3 - [ZN185_HUMAN]                                                |      |      |      |      | 0.45 | 0.58 | 0.42 | 0.55 | 0.5 | 0.00 |
| Q9NR56 | Muscleblind-like protein 1<br>OS=Homo sapiens<br>GN=MBNL1<br>PE=1 SV=2 - [MBNL1_HUMAN]                                              |      |      |      |      | 0.64 | 0.56 | 0.44 | 0.36 | 0.5 | 0.00 |
| O15117 | FYN-binding protein<br>OS=Homo sapiens<br>GN=FYB<br>PE=1 SV=2 - [FYB_HUMAN]                                                         | 0.68 | 0.77 | 0.68 | 0.78 | 0.37 | 0.35 | 0.19 | 0.17 | 0.5 | 0.00 |
| Q7L9B9 | Endonuclease/exonuclease/phosphatase family domain-containing protein 1<br>OS=Homo sapiens<br>GN=EEPD1<br>PE=1 SV=2 - [EEPD1_HUMAN] |      |      |      |      | 0.62 | 0.47 | 0.53 | 0.37 | 0.5 | 0.00 |

|        |                                                                                                            |      |      |      |      |      |       |      |      |     |      |
|--------|------------------------------------------------------------------------------------------------------------|------|------|------|------|------|-------|------|------|-----|------|
| Q9NU22 | Midasin<br>OS=Homo sapiens<br>GN=MDN1<br>PE=1 SV=2 - [MDN1_HUMAN]                                          | 0.50 | 0.70 | 0.48 | 0.68 | 0.74 | -0.15 | 0.95 | 0.06 | 0.5 | 0.01 |
| Q96GW7 | Brevican core protein<br>OS=Homo sapiens<br>GN=BCAN<br>PE=1 SV=2 - [PGCB_HUMAN]                            |      |      |      |      | 0.68 | 0.47  | 0.52 | 0.30 | 0.5 | 0.01 |
| Q8NEZ4 | Histone-lysine N-methyltransferase MLL3<br>OS=Homo sapiens<br>GN=MLL3<br>PE=1 SV=3 - [MLL3_HUMAN]          |      |      |      |      | 0.60 | 0.51  | 0.47 | 0.39 | 0.5 | 0.00 |
| Q15746 | Myosin light chain kinase, smooth muscle<br>OS=Homo sapiens<br>GN=MYLK<br>PE=1 SV=4 - [MYLK_HUMAN]         |      |      |      |      | 0.50 | 0.56  | 0.41 | 0.47 | 0.5 | 0.00 |
| P07108 | Acyl-CoA-binding protein<br>OS=Homo sapiens<br>GN=DBI<br>PE=1 SV=2 - [ACBP_HUMAN]                          |      |      |      |      | 0.59 | 0.48  | 0.47 | 0.40 | 0.5 | 0.00 |
| Q9UDY2 | Tight junction protein ZO-2<br>OS=Homo sapiens<br>GN=TJP2<br>PE=1 SV=2 - [ZO2_HUMAN]                       |      |      |      |      | 0.53 | 0.53  | 0.44 | 0.44 | 0.5 | 0.00 |
| Q13477 | Mucosal addressin cell adhesion molecule 1<br>OS=Homo sapiens<br>GN=MADCAM1<br>PE=1 SV=2 - [MADCAM1_HUMAN] | 0.50 | 0.41 | 0.49 | 0.39 | 0.46 | 0.59  | 0.44 | 0.58 | 0.5 | 0.00 |

|        |                                                                                                |      |      |      |      |      |      |      |       |     |      |
|--------|------------------------------------------------------------------------------------------------|------|------|------|------|------|------|------|-------|-----|------|
| P21741 | Midkine<br>OS=Homo sapiens<br>GN=MDK<br>PE=1 SV=1 - [MK_HUMAN]                                 | 0.37 | 0.45 | 0.09 | 0.19 | 0.80 | 0.66 | 0.72 | 0.58  | 0.5 | 0.00 |
| P01833 | Polymeric immunoglobulin receptor<br>OS=Homo sapiens<br>GN=PIGR<br>PE=1 SV=4 - [PIGR_HUMAN]    | 0.59 | 0.58 | 0.56 | 0.61 | 0.77 | 0.42 | 0.37 | -0.06 | 0.5 | 0.00 |
| Q99567 | Nuclear pore complex protein Nup88<br>OS=Homo sapiens<br>GN=NUP88<br>PE=1 SV=2 - [NUP88_HUMAN] | 0.18 | 0.17 | 0.58 | 0.57 | 0.68 | 0.74 | 0.42 | 0.48  | 0.5 | 0.00 |
| P32004 | Neural cell adhesion molecule L1<br>OS=Homo sapiens<br>GN=L1CAM<br>PE=1 SV=2 - [L1CAM_HUMAN]   | 0.82 | 0.59 | 0.32 | 0.18 |      |      |      |       | 0.5 | 0.04 |
| Q9NQT8 | Kinesin-like protein KIF13B<br>OS=Homo sapiens<br>GN=KIF13B<br>PE=1 SV=1 - [KIF13B_HUMAN]      |      |      |      |      | 0.41 | 0.51 | 0.44 | 0.54  | 0.5 | 0.00 |
| P14868 | Aspartate--tRNA ligase, cytoplasmic<br>OS=Homo sapiens<br>GN=DARS<br>PE=1 SV=2 - [SYDC_HUMAN]  | 0.53 | 0.50 | 0.50 | 0.47 | 0.38 | 0.48 | 0.40 | 0.50  | 0.5 | 0.00 |
| O43639 | Cytoplasmic protein NCK2<br>OS=Homo sapiens<br>GN=NCK2<br>PE=1 SV=2 - [NCK2_HUMAN]             |      |      |      |      | 0.58 | 0.45 | 0.48 | 0.34  | 0.5 | 0.00 |

|        |                                                                                                           |      |      |      |      |      |      |      |      |     |      |
|--------|-----------------------------------------------------------------------------------------------------------|------|------|------|------|------|------|------|------|-----|------|
| Q96F63 | Coiled-coil domain-containing protein 97<br>OS=Homo sapiens<br>GN=CCDC97<br>PE=1 SV=1 - [CCD97_HUMAN]     |      |      |      |      | 0.55 | 0.53 | 0.40 | 0.37 | 0.5 | 0.00 |
| Q9H4A3 | Serine/threonine-protein kinase WNK1<br>OS=Homo sapiens<br>GN=WNK1<br>PE=1 SV=2 - [WNK1_HUMAN]            |      |      |      |      | 0.87 | 0.21 | 0.48 | 0.29 | 0.5 | 0.05 |
| O75127 | Pentatricopeptide repeat-containing protein 1<br>OS=Homo sapiens<br>GN=PTCD1<br>PE=1 SV=2 - [PTCD1_HUMAN] | 0.42 | 0.66 | 0.25 | 0.50 |      |      |      |      | 0.5 | 0.01 |
| Q8WTQ4 | Uncharacterized protein C16orf78<br>OS=Homo sapiens<br>GN=C16orf78<br>PE=2 SV=1 - [CP078_HUMAN]           | 0.46 | 0.49 | 0.42 | 0.47 |      |      |      |      | 0.5 | 0.00 |
| O43516 | WAS/WASL-interacting protein family member 1<br>OS=Homo sapiens<br>GN=WIPF1<br>PE=1 SV=3 - [WIPF1_HUMAN]  |      |      |      |      | 0.58 | 0.51 | 0.41 | 0.33 | 0.5 | 0.00 |



|        |                                                                                                                                                          |      |      |      |      |      |      |      |      |      |      |
|--------|----------------------------------------------------------------------------------------------------------------------------------------------------------|------|------|------|------|------|------|------|------|------|------|
| O60264 | SWI/SNF-related matrix-associated actin-dependent regulator of chromatin subfamily A member 5<br>OS=Homo sapiens<br>GN=SMARCA5 PE=1 SV=1 - [SMCA5_HUMAN] | 0.49 | 0.22 | 0.69 | 0.44 |      |      |      | 0.5  | 0.02 |      |
| P30046 | D-dopachrome decarboxylase<br>OS=Homo sapiens<br>GN=DDT PE=1 SV=3 - [DOPD_HUMAN]                                                                         |      |      |      |      | 0.71 | 0.66 | 0.25 | 0.20 | 0.5  | 0.04 |
| P01710 | Ig lambda chain V-II region BO<br>OS=Homo sapiens<br>PE=1 SV=1 - [LV207_HUMAN]                                                                           | 0.36 | 0.24 | 0.27 | 0.16 | 0.58 | 0.65 | 0.71 | 0.65 | 0.5  | 0.00 |
| P21810 | Biglycan<br>OS=Homo sapiens<br>GN=BGN PE=1 SV=2 - [PGS1_HUMAN]                                                                                           | 0.24 | 0.16 | 0.17 | 0.09 | 0.80 | 0.71 | 0.77 | 0.68 | 0.5  | 0.00 |
| P02741 | C-reactive protein<br>OS=Homo sapiens<br>GN=CRP PE=1 SV=1 - [CRP_HUMAN]                                                                                  | 0.32 | 0.47 | 0.35 | 0.61 | 0.39 | 0.51 | 0.42 | 0.54 | 0.5  | 0.00 |
| Q16181 | Septin-7<br>OS=Homo sapiens<br>GN=SEPT7 PE=1 SV=2 - [SEPT7_HUMAN]                                                                                        | 0.25 | 0.57 | 0.06 | 0.40 | 0.59 | 0.61 | 0.54 | 0.56 | 0.4  | 0.00 |
| P29692 | Elongation factor 1-delta<br>OS=Homo sapiens<br>GN=EEF1D PE=1 SV=5 - [EF1D_HUMAN]                                                                        |      |      |      |      | 0.22 | 0.54 | 0.39 | 0.62 | 0.4  | 0.02 |

|        |                                                                                                                              |       |       |      |      |      |      |      |      |     |      |
|--------|------------------------------------------------------------------------------------------------------------------------------|-------|-------|------|------|------|------|------|------|-----|------|
| P16152 | Carbonyl reductase [NADPH] 1<br>OS=Homo sapiens<br>GN=CBR1<br>PE=1 SV=3 - [CBR1_HUMAN]                                       | -0.02 | -0.05 | 0.05 | 0.03 | 0.97 | 1.01 | 0.76 | 0.80 | 0.4 | 0.03 |
| Q13822 | Ectonucleotide pyrophosphatase/phosphodiesterase family member 2<br>OS=Homo sapiens<br>GN=ENPP2<br>PE=1 SV=3 - [ENPP2_HUMAN] | 0.68  | 0.99  | 0.45 | 0.78 | 0.31 | 0.17 | 0.00 | 0.17 | 0.4 | 0.01 |
| Q08495 | Dematin<br>OS=Homo sapiens<br>GN=EPB49<br>PE=1 SV=3 - [DEMA_HUMAN]                                                           |       |       |      |      | 0.26 | 0.45 | 0.44 | 0.61 | 0.4 | 0.01 |
| P54727 | UV excision repair protein RAD23 homolog B<br>OS=Homo sapiens<br>GN=RAD23B<br>PE=1 SV=1 - [RD23B_HUMAN]                      |       |       |      |      | 0.54 | 0.43 | 0.44 | 0.36 | 0.4 | 0.00 |
| Q05315 | Eosinophil lysophospholipase<br>OS=Homo sapiens<br>GN=CLC<br>PE=1 SV=3 - [LPPL_HUMAN]                                        |       |       |      |      | 0.38 | 0.58 | 0.29 | 0.50 | 0.4 | 0.01 |
| Q05209 | Tyrosine-protein phosphatase non-receptor type 12<br>OS=Homo sapiens<br>GN=PTPN12<br>PE=1 SV=3 - [PTN12_HUMAN]               | 0.58  | 0.69  | 0.53 | 0.66 | 0.19 | 0.30 | 0.21 | 0.35 | 0.4 | 0.00 |

|        |                                                                                                              |      |      |      |      |      |      |      |      |     |      |
|--------|--------------------------------------------------------------------------------------------------------------|------|------|------|------|------|------|------|------|-----|------|
| Q14247 | Src substrate<br>cortactin<br>OS=Homo<br>sapiens<br>GN=CTTN<br>PE=1 SV=2 -<br>[SRC8_HUMAN]                   |      |      |      |      | 0.67 | 0.30 | 0.49 | 0.29 | 0.4 | 0.02 |
| Q14050 | Collagen<br>alpha-3(IX)<br>chain<br>OS=Homo<br>sapiens<br>GN=COL9A3<br>PE=2 SV=2 -<br>[CO9A3_HUMAN]          | 0.30 | 0.43 | 0.44 | 0.58 |      |      |      |      | 0.4 | 0.00 |
| P12081 | Histidine--<br>tRNA ligase,<br>cytoplasmic<br>OS=Homo<br>sapiens<br>GN=HARS<br>PE=1 SV=2 -<br>[SYHC_HUMAN]   | 0.49 | 0.30 | 0.56 | 0.38 |      |      |      |      | 0.4 | 0.00 |
| Q15828 | Cystatin-M<br>OS=Homo<br>sapiens<br>GN=CST6<br>PE=1 SV=1 -<br>[CYTM_HUMAN]                                   |      |      |      |      | 0.45 | 0.61 | 0.26 | 0.42 | 0.4 | 0.01 |
| Q9UBR2 | Cathepsin Z<br>OS=Homo<br>sapiens<br>GN=CTSZ<br>PE=1 SV=1 -<br>[CATZ_HUMAN]                                  |      |      |      |      | 0.43 | 0.55 | 0.31 | 0.43 | 0.4 | 0.00 |
| Q9UKY7 | Protein CDV3<br>homolog<br>OS=Homo<br>sapiens<br>GN=CDV3<br>PE=1 SV=1 -<br>[CDV3_HUMAN]                      |      |      |      |      | 0.19 | 0.60 | 0.43 | 0.49 | 0.4 | 0.02 |
| Q86VF7 | Nebulin-<br>related-<br>anchoring<br>protein<br>OS=Homo<br>sapiens<br>GN=NRAP<br>PE=2 SV=2 -<br>[NRAP_HUMAN] |      |      |      |      | 0.61 | 0.48 | 0.37 | 0.24 | 0.4 | 0.01 |
| P01742 | Ig heavy<br>chain V-I<br>region EU<br>OS=Homo<br>sapiens<br>PE=1 SV=1 -<br>[HV101_HUMAN]                     | 1.04 | 0.64 | 0.33 | 0.05 | 0.42 | 0.35 | 0.28 | 0.29 | 0.4 | 0.00 |

|        |                                                                                                                       |      |      |      |      |      |      |      |      |      |      |
|--------|-----------------------------------------------------------------------------------------------------------------------|------|------|------|------|------|------|------|------|------|------|
| Q9BW91 | ADP-ribose pyrophosphatase, mitochondrial<br>OS=Homo sapiens<br>GN=NUDT9<br>PE=1 SV=1 - [NUDT9_HUMAN]                 | 0.20 | 0.43 | 0.40 | 0.66 |      |      |      | 0.4  | 0.02 |      |
| Q8WWQ8 | Stabilin-2<br>OS=Homo sapiens<br>GN=STAB2<br>PE=1 SV=3 - [STAB2_HUMAN]                                                | 0.24 | 0.21 | 0.37 | 0.36 | 0.39 | 0.38 | 0.71 | 0.70 | 0.4  | 0.00 |
| Q9ULK5 | Vang-like protein 2<br>OS=Homo sapiens<br>GN=VANGL2<br>PE=1 SV=2 - [VANG2_HUMAN]                                      |      |      |      |      | 0.49 | 0.38 | 0.46 | 0.34 | 0.4  | 0.00 |
| Q9H7P9 | Pleckstrin homology domain-containing family G member 2<br>OS=Homo sapiens<br>GN=PLEKHG2<br>PE=1 SV=3 - [PKHG2_HUMAN] | 0.55 | 0.41 | 0.40 | 0.29 |      |      |      |      | 0.4  | 0.00 |
| P05019 | Insulin-like growth factor I<br>OS=Homo sapiens<br>GN=IGF1<br>PE=1 SV=1 - [IGF1_HUMAN]                                |      |      |      |      | 0.48 | 0.42 | 0.35 | 0.38 | 0.4  | 0.00 |
| P14780 | Matrix metalloproteinase-9<br>OS=Homo sapiens<br>GN=MMP9<br>PE=1 SV=3 - [MMP9_HUMAN]                                  | 0.36 | 0.39 | 0.42 | 0.45 | 0.40 | 0.41 | 0.39 | 0.44 | 0.4  | 0.00 |
| Q07890 | Son of sevenless homolog 2<br>OS=Homo sapiens<br>GN=SOS2<br>PE=1 SV=2 - [SOS2_HUMAN]                                  | 0.35 | 0.45 | 0.36 | 0.48 |      |      |      |      | 0.4  | 0.00 |

|        |                                                                                                                         |       |      |      |      |      |      |      |      |     |      |
|--------|-------------------------------------------------------------------------------------------------------------------------|-------|------|------|------|------|------|------|------|-----|------|
| Q9UGM5 | Fetuin-B<br>OS=Homo sapiens<br>GN=FETUB<br>PE=1 SV=2 - [FETUB_HUMAN]                                                    | 0.54  | 0.54 | 0.54 | 0.55 | 0.21 | 0.51 | 0.05 | 0.32 | 0.4 | 0.00 |
| P57679 | Ellis-van Creveld syndrome protein<br>OS=Homo sapiens<br>GN=EVC<br>PE=1 SV=1 - [EVC_HUMAN]                              | 0.15  | 0.56 | 0.24 | 0.67 |      |      |      |      | 0.4 | 0.05 |
| P26045 | Tyrosine-protein phosphatase non-receptor type 3<br>OS=Homo sapiens<br>GN=PTPN3<br>PE=1 SV=2 - [PTN3_HUMAN]             | -0.35 | 0.56 | 0.00 | 0.92 | 0.49 | 0.57 | 0.49 | 0.57 | 0.4 | 0.02 |
| O43149 | Zinc finger ZZ-type and EF-hand domain-containing protein 1<br>OS=Homo sapiens<br>GN=ZZEF1<br>PE=1 SV=6 - [ZZEF1_HUMAN] |       |      |      |      | 0.52 | 0.45 | 0.36 | 0.29 | 0.4 | 0.00 |
| Q96P20 | NACHT, LRR and PYD domains-containing protein 3<br>OS=Homo sapiens<br>GN=NLRP3<br>PE=1 SV=3 - [NALP3_HUMAN]             |       |      |      |      | 0.62 | 0.40 | 0.40 | 0.19 | 0.4 | 0.02 |
| Q9H095 | IQ domain-containing protein G<br>OS=Homo sapiens<br>GN=IQCG<br>PE=2 SV=1 - [IQCG_HUMAN]                                |       |      |      |      | 0.44 | 0.45 | 0.35 | 0.36 | 0.4 | 0.00 |

|        |                                                                                                            |      |      |      |      |      |      |      |      |      |      |
|--------|------------------------------------------------------------------------------------------------------------|------|------|------|------|------|------|------|------|------|------|
| P26641 | Elongation factor 1-gamma<br>OS=Homo sapiens<br>GN=EEF1G<br>PE=1 SV=3 -<br>[EF1G_HUMAN]                    |      |      |      | 0.55 | 0.30 | 0.49 | 0.24 | 0.4  | 0.01 |      |
| P61978 | Heterogeneous nuclear ribonucleoprotein K<br>OS=Homo sapiens<br>GN=HNRNP K<br>PE=1 SV=1 -<br>[HNRPK_HUMAN] |      |      |      | 0.47 | 0.41 | 0.38 | 0.32 | 0.4  | 0.00 |      |
| P10646 | Tissue factor pathway inhibitor<br>OS=Homo sapiens<br>GN=TFPI<br>PE=1 SV=1 -<br>[TFPI1_HUMAN]              | 0.82 | 0.78 | 0.44 | 0.43 | 0.29 | 0.06 | 0.23 | 0.10 | 0.4  | 0.01 |
| P30307 | M-phase inducer phosphatase 3<br>OS=Homo sapiens<br>GN=CDC25C<br>PE=1 SV=2 -<br>[MPIP3_HUMAN]              | 0.37 | 0.35 | 0.47 | 0.38 |      |      |      |      | 0.4  | 0.00 |
| Q9Y467 | Sal-like protein 2<br>OS=Homo sapiens<br>GN=SALL2<br>PE=1 SV=4 -<br>[SALL2_HUMAN]                          | 0.24 | 0.52 | 0.27 | 0.54 |      |      |      |      | 0.4  | 0.02 |
| O00187 | Mannan-binding lectin serine protease 2<br>OS=Homo sapiens<br>GN=MASP2<br>PE=1 SV=4 -<br>[MASP2_HUMAN]     | 0.31 | 0.30 | 0.34 | 0.36 | 0.43 | 0.42 | 0.51 | 0.46 | 0.4  | 0.00 |

|        |                                                                                                                               |      |      |      |      |      |      |      |      |     |      |
|--------|-------------------------------------------------------------------------------------------------------------------------------|------|------|------|------|------|------|------|------|-----|------|
| Q16270 | Insulin-like growth factor-binding protein 7<br>OS=Homo sapiens<br>GN=IGFBP7<br>PE=1 SV=1 - [IBP7_HUMAN]                      |      |      |      |      | 0.56 | 0.41 | 0.37 | 0.22 | 0.4 | 0.01 |
| Q12955 | Ankyrin-3<br>OS=Homo sapiens<br>GN=ANK3<br>PE=1 SV=3 - [ANK3_HUMAN]                                                           | 0.46 | 0.40 | 0.25 | 0.20 | 0.49 | 0.50 | 0.39 | 0.40 | 0.4 | 0.00 |
| Q8WUH2 | Transforming growth factor-beta receptor-associated protein 1<br>OS=Homo sapiens<br>GN=TGFBRA<br>P1 PE=1 SV=1 - [TGFA1_HUMAN] | 0.50 | 0.54 | 0.72 | 0.76 | 0.10 | 0.17 | 0.12 | 0.19 | 0.4 | 0.01 |
| Q70EL4 | Ubiquitin carboxyl-terminal hydrolase 43<br>OS=Homo sapiens<br>GN=USP43<br>PE=1 SV=2 - [UBP43_HUMAN]                          |      |      |      |      | 0.44 | 0.39 | 0.37 | 0.33 | 0.4 | 0.00 |
| P05121 | Plasminogen activator inhibitor 1<br>OS=Homo sapiens<br>GN=SERPINE1<br>PE=1 SV=1 - [PAI1_HUMAN]                               | 0.48 | 0.41 | 0.41 | 0.41 | 0.47 | 0.31 | 0.37 | 0.21 | 0.4 | 0.00 |
| Q14696 | LDLR chaperone<br>MESD<br>OS=Homo sapiens<br>GN=MESDC2<br>PE=1 SV=2 - [MESD_HUMAN]                                            |      |      |      |      | 0.23 | 0.38 | 0.48 | 0.42 | 0.4 | 0.01 |

|        |                                                                                                           |      |       |       |       |      |      |      |      |     |      |
|--------|-----------------------------------------------------------------------------------------------------------|------|-------|-------|-------|------|------|------|------|-----|------|
| Q14624 | Inter-alpha-trypsin inhibitor heavy chain H4<br>OS=Homo sapiens<br>GN=ITIH4<br>PE=1 SV=4 - [ITIH4_HUMAN]  | 0.35 | 0.38  | 0.34  | 0.36  | 0.36 | 0.43 | 0.36 | 0.46 | 0.4 | 0.00 |
| Q9UJL9 | Zinc finger protein 643<br>OS=Homo sapiens<br>GN=ZNF643<br>PE=2 SV=2 - [ZNF643_HUMAN]                     |      |       |       |       | 0.20 | 0.46 | 0.29 | 0.55 | 0.4 | 0.02 |
| P54577 | Tyrosine--tRNA ligase, cytoplasmic<br>OS=Homo sapiens<br>GN=YARS<br>PE=1 SV=4 - [SYYC_HUMAN]              | 0.06 | -0.03 | -0.05 | -0.07 | 0.63 | 0.92 | 0.58 | 0.95 | 0.4 | 0.05 |
| Q9H7D0 | Dedicator of cytokinesis protein 5<br>OS=Homo sapiens<br>GN=DOCK5<br>PE=1 SV=3 - [DOCK5_HUMAN]            | 0.27 | 0.34  | 0.40  | 0.48  |      |      |      |      | 0.4 | 0.00 |
| Q9P241 | Probable phospholipid-transporting ATPase VD<br>OS=Homo sapiens<br>GN=ATP10D<br>PE=2 SV=3 - [AT10D_HUMAN] | 0.52 | 0.19  | 0.55  | 0.22  |      |      |      |      | 0.4 | 0.03 |
| Q5T0Z8 | Uncharacterized protein C6orf132<br>OS=Homo sapiens<br>GN=C6orf132<br>PE=1 SV=4 - [CF132_HUMAN]           | 0.41 | 0.54  | 0.18  | 0.33  |      |      |      |      | 0.4 | 0.02 |



|        |                                                                                                                  |      |      |      |      |      |      |      |      |     |      |
|--------|------------------------------------------------------------------------------------------------------------------|------|------|------|------|------|------|------|------|-----|------|
| P30876 | DNA-directed RNA polymerase II subunit RPB2<br>OS=Homo sapiens<br>GN=POLR2B<br>PE=1 SV=1 - [RPB2_HUMAN]          |      |      |      |      | 0.40 | 0.38 | 0.35 | 0.33 | 0.4 | 0.00 |
| P61916 | Epididymal secretory protein E1<br>OS=Homo sapiens<br>GN=NPC2<br>PE=1 SV=1 - [NPC2_HUMAN]                        |      |      |      |      | 0.41 | 0.47 | 0.26 | 0.32 | 0.4 | 0.00 |
| Q8IV38 | Ankyrin repeat and MYND domain-containing protein 2<br>OS=Homo sapiens<br>GN=ANKMY2<br>PE=1 SV=1 - [ANKY2_HUMAN] | 0.41 | 0.34 | 0.29 | 0.40 |      |      |      |      | 0.4 | 0.00 |
| P01605 | Ig kappa chain V-I region Lay<br>OS=Homo sapiens<br>PE=1 SV=1 - [KV113_HUMAN]                                    | 0.17 | 0.23 | 0.22 | 0.25 | 0.44 | 0.53 | 0.47 | 0.54 | 0.4 | 0.00 |
| Q9NR48 | Histone-lysine N-methyltransferase ASH1L<br>OS=Homo sapiens<br>GN=ASH1L<br>PE=1 SV=2 - [ASH1L_HUMAN]             | 0.15 | 0.24 | 0.42 | 0.61 |      |      |      |      | 0.4 | 0.04 |
| P21291 | Cysteine and glycine-rich protein 1<br>OS=Homo sapiens<br>GN=CSRP1<br>PE=1 SV=3 - [CSRP1_HUMAN]                  |      |      |      |      | 0.34 | 0.49 | 0.21 | 0.36 | 0.4 | 0.01 |

|         |                                                                                                    |      |      |      |      |      |      |      |      |     |      |
|---------|----------------------------------------------------------------------------------------------------|------|------|------|------|------|------|------|------|-----|------|
| Q5GH76  | XK-related protein 4<br>OS=Homo sapiens<br>GN=XKR4<br>PE=1 SV=1 - [XKR4_HUMAN]                     | 0.06 | 0.30 | 0.37 | 0.60 | 0.66 | 0.41 | 0.33 | 0.08 | 0.4 | 0.00 |
| O75594  | Peptidoglycan recognition protein 1<br>OS=Homo sapiens<br>GN=PGLYRP1<br>PE=1 SV=1 - [PGRP1_HUMAN]  | 0.30 | 0.29 | 0.45 | 0.46 | 0.25 | 0.37 | 0.29 | 0.38 | 0.3 | 0.00 |
| Q7Z591  | AT-hook-containing transcription factor<br>OS=Homo sapiens<br>GN=AKNA<br>PE=1 SV=2 - [AKNA_HUMAN]  | 0.37 | 0.33 | 0.37 | 0.32 |      |      |      |      | 0.3 | 0.00 |
| P16333  | Cytoplasmic protein NCK1<br>OS=Homo sapiens<br>GN=NCK1<br>PE=1 SV=1 - [NCK1_HUMAN]                 |      |      |      |      | 0.33 | 0.35 | 0.34 | 0.37 | 0.3 | 0.00 |
| Q9BWD1  | Acetyl-CoA acetyltransferase, cytosolic<br>OS=Homo sapiens<br>GN=ACAT2<br>PE=1 SV=2 - [THIC_HUMAN] | 0.28 | 0.35 | 0.34 | 0.43 |      |      |      |      | 0.3 | 0.00 |
| Q2WVGJ9 | Fer-1-like protein 6<br>OS=Homo sapiens<br>GN=FER1L6<br>PE=2 SV=2 - [FR1L6_HUMAN]                  |      |      |      |      | 0.35 | 0.55 | 0.14 | 0.35 | 0.3 | 0.02 |

|        |                                                                                                                          |      |      |      |      |      |      |      |      |     |      |
|--------|--------------------------------------------------------------------------------------------------------------------------|------|------|------|------|------|------|------|------|-----|------|
| O95202 | LETM1 and EF-hand domain-containing protein 1, mitochondrial<br>OS=Homo sapiens<br>GN=LETM1<br>PE=1 SV=1 - [LETM1_HUMAN] | 0.39 | 0.54 | 0.16 | 0.29 |      |      | 0.3  | 0.02 |     |      |
| P24666 | Low molecular weight phosphotyrosine protein phosphatase<br>OS=Homo sapiens<br>GN=ACP1<br>PE=1 SV=3 - [PPAC_HUMAN]       |      |      |      |      | 0.35 | 0.55 | 0.14 | 0.34 | 0.3 | 0.02 |
| P01019 | Angiotensinogen<br>OS=Homo sapiens<br>GN=AGT<br>PE=1 SV=1 - [ANGT_HUMAN]                                                 | 0.33 | 0.46 | 0.36 | 0.47 | 0.27 | 0.39 | 0.17 | 0.32 | 0.3 | 0.00 |
| O14647 | Chromodomain-helicase-DNA-binding protein 2<br>OS=Homo sapiens<br>GN=CHD2<br>PE=1 SV=2 - [CHD2_HUMAN]                    | 0.47 | 0.38 | 0.43 | 0.36 | 0.37 | 0.40 | 0.15 | 0.17 | 0.3 | 0.00 |
| P07093 | Glia-derived nexin<br>OS=Homo sapiens<br>GN=SERPIN E2<br>PE=1 SV=1 - [GDN_HUMAN]                                         | 0.43 | 0.46 | 0.43 | 0.52 | 0.13 | 0.19 | 0.25 | 0.31 | 0.3 | 0.00 |
| Q8WUA8 | Tsukushin<br>OS=Homo sapiens<br>GN=TSKU<br>PE=2 SV=3 - [TSK_HUMAN]                                                       | 0.63 | 0.45 | 0.52 | 0.23 | 0.17 | 0.18 | 0.26 | 0.28 | 0.3 | 0.00 |

|        |                                                                                                                 |      |       |      |      |      |      |      |      |      |      |
|--------|-----------------------------------------------------------------------------------------------------------------|------|-------|------|------|------|------|------|------|------|------|
| P12109 | Collagen alpha-1(VI) chain<br>OS=Homo sapiens<br>GN=COL6A1<br>PE=1 SV=3 - [CO6A1_HUMAN]                         | 0.49 | 0.37  | 0.30 | 0.19 |      |      |      | 0.3  | 0.01 |      |
| P80108 | Phosphatidylinositol-glycan-specific phospholipase D<br>OS=Homo sapiens<br>GN=GPLD1<br>PE=1 SV=3 - [PHLD_HUMAN] | 0.28 | 0.32  | 0.35 | 0.34 | 0.36 | 0.46 | 0.25 | 0.35 | 0.3  | 0.00 |
| P29317 | Ephrin type-A receptor 2<br>OS=Homo sapiens<br>GN=EPHA2<br>PE=1 SV=2 - [EPHA2_HUMAN]                            | 0.00 | -0.02 | 0.06 | 0.07 | 0.72 | 0.88 | 0.42 | 0.57 | 0.3  | 0.03 |
| Q92783 | Signal transducing adapter molecule 1<br>OS=Homo sapiens<br>GN=STAM<br>PE=1 SV=3 - [STAM1_HUMAN]                |      |       |      |      | 0.40 | 0.08 | 0.58 | 0.26 | 0.3  | 0.05 |
| O75443 | Alpha-tectorin<br>OS=Homo sapiens<br>GN=TECTA<br>PE=1 SV=3 - [TECTA_HUMAN]                                      | 0.09 | 0.18  | 0.31 | 0.44 | 0.40 | 0.49 | 0.33 | 0.42 | 0.3  | 0.00 |
| Q96ME1 | F-box/LRR-repeat protein 18<br>OS=Homo sapiens<br>GN=FBXL18<br>PE=2 SV=2 - [FXL18_HUMAN]                        |      |       |      |      | 0.24 | 0.45 | 0.21 | 0.42 | 0.3  | 0.01 |
| Q8N998 | Coiled-coil domain-containing protein 89<br>OS=Homo sapiens<br>GN=CCDC89<br>PE=2 SV=1 - [CCD89_HUMAN]           | 0.28 | 0.27  | 0.39 | 0.39 |      |      |      |      | 0.3  | 0.00 |

|        |                                                                                                                                     |      |      |      |      |      |      |      |      |     |      |
|--------|-------------------------------------------------------------------------------------------------------------------------------------|------|------|------|------|------|------|------|------|-----|------|
| Q96KN2 | Beta-Ala-His dipeptidase<br>OS=Homo sapiens<br>GN=CNDP1<br>PE=1 SV=4 - [CNDP1_HUMAN]                                                | 0.27 | 0.25 | 0.22 | 0.26 | 0.33 | 0.51 | 0.32 | 0.46 | 0.3 | 0.00 |
| Q5JPE7 | Nodal modulator 2<br>OS=Homo sapiens<br>GN=NOMO2<br>PE=1 SV=1 - [NOMO2_HUMAN]                                                       | 0.26 | 0.28 | 0.37 | 0.40 |      |      |      |      | 0.3 | 0.00 |
| Q58F21 | Bromodomain testis-specific protein<br>OS=Homo sapiens<br>GN=BRDT<br>PE=1 SV=4 - [BRDT_HUMAN]                                       | 0.40 | 0.42 | 0.23 | 0.25 |      |      |      |      | 0.3 | 0.01 |
| Q86SQ4 | G-protein coupled receptor 126<br>OS=Homo sapiens<br>GN=GPR126<br>PE=1 SV=3 - [GP126_HUMAN]                                         | 0.17 | 0.28 | 0.34 | 0.50 |      |      |      |      | 0.3 | 0.02 |
| Q7L3T8 | Probable proline--tRNA ligase, mitochondrial<br>OS=Homo sapiens<br>GN=PARS2<br>PE=1 SV=1 - [SYPM_HUMAN]                             |      |      |      |      | 0.28 | 0.43 | 0.20 | 0.36 | 0.3 | 0.01 |
| Q6IS24 | Putative polypeptide N-acetylgalactosaminyltransferase-like protein 3<br>OS=Homo sapiens<br>GN=WBSCR17<br>PE=2 SV=2 - [GLTL3_HUMAN] | 0.14 | 0.40 | 0.23 | 0.50 |      |      |      |      | 0.3 | 0.03 |

|        |                                                                                                    |      |      |      |      |      |       |      |      |     |      |
|--------|----------------------------------------------------------------------------------------------------|------|------|------|------|------|-------|------|------|-----|------|
| P01033 | Metalloprotease inhibitor 1 OS=Homo sapiens<br>GN=TIMP1<br>PE=1 SV=1 - [TIMP1_HUMAN]               | 0.30 | 0.29 | 0.23 | 0.24 | 0.28 | 0.45  | 0.27 | 0.47 | 0.3 | 0.00 |
| Q14CM0 | FERM and PDZ domain-containing protein 4 OS=Homo sapiens<br>GN=FRMPD4<br>PE=1 SV=1 - [FRPD4_HUMAN] | 0.26 | 0.38 | 0.25 | 0.37 |      |       |      |      | 0.3 | 0.00 |
| Q6ZN06 | Zinc finger protein 813 OS=Homo sapiens<br>GN=ZNF813<br>PE=2 SV=2 - [ZN813_HUMAN]                  | 0.41 | 0.53 | 0.09 | 0.22 |      |       |      |      | 0.3 | 0.05 |
| Q7L2Z9 | Centromere protein Q OS=Homo sapiens<br>GN=CENPQ<br>PE=1 SV=1 - [CENPQ_HUMAN]                      | 0.19 | 0.25 | 0.00 | 0.08 | 0.42 | 0.52  | 0.46 | 0.55 | 0.3 | 0.00 |
| P01344 | Insulin-like growth factor II OS=Homo sapiens<br>GN=IGF2<br>PE=1 SV=1 - [IGF2_HUMAN]               | 0.22 | 0.30 | 0.22 | 0.32 | 0.39 | -0.03 | 0.58 | 0.45 | 0.3 | 0.00 |
| Q6ZS30 | Neurobeachin-like protein 1 OS=Homo sapiens<br>GN=NBEAL1<br>PE=2 SV=3 - [NBEL1_HUMAN]              |      |      |      |      | 0.32 | 0.24  | 0.37 | 0.29 | 0.3 | 0.00 |
| Q6S5L8 | SHC-transforming protein 4 OS=Homo sapiens<br>GN=SHC4<br>PE=1 SV=1 - [SHC4_HUMAN]                  | 0.21 | 0.16 | 0.05 | 0.00 | 0.51 | 0.46  | 0.54 | 0.49 | 0.3 | 0.01 |

|        |                                                                                                                |      |      |      |      |      |      |      |      |     |      |
|--------|----------------------------------------------------------------------------------------------------------------|------|------|------|------|------|------|------|------|-----|------|
| Q6IBS0 | Twinfilin-2<br>OS=Homo sapiens<br>GN=TWF2<br>PE=1 SV=2 - [TWF2_HUMAN]                                          |      |      |      |      | 0.29 | 0.30 | 0.27 | 0.35 | 0.3 | 0.00 |
| Q9Y2R2 | Tyrosine-protein phosphatase non-receptor type 22<br>OS=Homo sapiens<br>GN=PTPN22<br>PE=1 SV=2 - [PTN22_HUMAN] | 0.34 | 0.35 | 0.25 | 0.27 |      |      |      |      | 0.3 | 0.00 |
| Q13740 | CD166 antigen<br>OS=Homo sapiens<br>GN=ALCAM<br>PE=1 SV=2 - [CD166_HUMAN]                                      | 0.35 | 0.28 | 0.30 | 0.32 | 0.32 | 0.15 | 0.43 | 0.26 | 0.3 | 0.00 |
| Q14571 | Inositol 1,4,5-trisphosphate receptor type 2<br>OS=Homo sapiens<br>GN=ITPR2<br>PE=1 SV=2 - [ITPR2_HUMAN]       | 0.31 | 0.23 | 0.37 | 0.31 |      |      |      |      | 0.3 | 0.00 |
| Q8N8K9 | Uncharacterized protein KIAA1958<br>OS=Homo sapiens<br>GN=KIAA1958<br>PE=1 SV=1 - [K1958_HUMAN]                | 0.07 | 0.27 | 0.33 | 0.53 |      |      |      |      | 0.3 | 0.05 |
| P11279 | Lysosome-associated membrane glycoprotein 1<br>OS=Homo sapiens<br>GN=LAMP1<br>PE=1 SV=3 - [LAMP1_HUMAN]        | 0.24 | 0.28 | 0.31 | 0.37 |      |      |      |      | 0.3 | 0.00 |

|        |                                                                                                  |      |      |      |      |      |      |      |       |      |      |
|--------|--------------------------------------------------------------------------------------------------|------|------|------|------|------|------|------|-------|------|------|
| Q3MJ16 | Cytosolic phospholipase A2 epsilon<br>OS=Homo sapiens<br>GN=PLA2G4E<br>PE=1 SV=3 - [PA24E_HUMAN] | 0.37 | 0.14 | 0.45 | 0.22 |      |      |      | 0.3   | 0.02 |      |
| P22894 | Neutrophil collagenase<br>OS=Homo sapiens<br>GN=MMP8<br>PE=1 SV=1 - [MMP8_HUMAN]                 | 0.27 | 0.35 | 0.39 | 0.45 | 0.14 | 0.39 | 0.05 | 0.31  | 0.3  | 0.00 |
| P48729 | Casein kinase I isoform alpha<br>OS=Homo sapiens<br>GN=CSNK1A1<br>PE=1 SV=2 - [KC1A_HUMAN]       | 0.59 | 0.24 | 0.61 | 0.28 | 0.33 | 0.04 | 0.27 | -0.02 | 0.3  | 0.01 |
| Q13439 | Golgin subfamily A member 4<br>OS=Homo sapiens<br>GN=GOLGA4<br>PE=1 SV=1 - [GOGA4_HUMAN]         | 0.54 | 0.48 | 0.45 | 0.34 | 0.15 | 0.24 | 0.00 | 0.15  | 0.3  | 0.00 |
| O75112 | LIM domain-binding protein 3<br>OS=Homo sapiens<br>GN=LDB3<br>PE=1 SV=2 - [LDB3_HUMAN]           | 0.38 | 0.30 | 0.20 | 0.28 |      |      |      |       | 0.3  | 0.00 |
| Q9ULT0 | Tetratricopeptide repeat protein 7A<br>OS=Homo sapiens<br>GN=TTC7A<br>PE=1 SV=3 - [TTC7A_HUMAN]  | 0.13 | 0.37 | 0.20 | 0.46 |      |      |      |       | 0.3  | 0.03 |
| Q9Y5K6 | CD2-associated protein<br>OS=Homo sapiens<br>GN=CD2AP<br>PE=1 SV=1 - [CD2AP_HUMAN]               |      |      |      |      | 0.18 | 0.41 | 0.17 | 0.39  | 0.3  | 0.02 |



|        |                                                                                                             |      |      |       |       |      |      |      |      |     |      |
|--------|-------------------------------------------------------------------------------------------------------------|------|------|-------|-------|------|------|------|------|-----|------|
| P05107 | Integrin beta-2<br>OS=Homo sapiens<br>GN=ITGB2<br>PE=1 SV=2 - [ITB2_HUMAN]                                  | 0.33 | 0.39 | 0.19  | 0.25  |      |      |      |      | 0.3 | 0.01 |
| Q5VU43 | Myomegalin<br>OS=Homo sapiens<br>GN=PDE4DIP<br>PE=2 SV=1 - [MYOME_HUMAN]                                    | 0.42 | 0.21 | 0.36  | 0.16  |      |      |      |      | 0.3 | 0.02 |
| Q9NW38 | E3 ubiquitin-protein ligase<br>FANCL<br>OS=Homo sapiens<br>GN=FANCL<br>PE=1 SV=2 - [FANCL_HUMAN]            | 0.11 | 0.17 | -0.18 | -0.11 | 0.60 | 0.34 | 0.82 | 0.56 | 0.3 | 0.05 |
| O96005 | Cleft lip and palate transmembrane protein 1<br>OS=Homo sapiens<br>GN=CLPTM1<br>PE=1 SV=1 - [CLPT1_HUMAN]   | 0.29 | 0.39 | 0.17  | 0.29  |      |      |      |      | 0.3 | 0.01 |
| Q9BTY2 | Plasma alpha-L-fucosidase<br>OS=Homo sapiens<br>GN=FUCA2<br>PE=1 SV=2 - [FUCA2_HUMAN]                       | 0.38 | 0.23 | 0.34  | 0.20  |      |      |      |      | 0.3 | 0.01 |
| P07333 | Macrophage colony-stimulating factor 1 receptor<br>OS=Homo sapiens<br>GN=CSF1R<br>PE=1 SV=2 - [CSF1R_HUMAN] | 0.26 | 0.28 | 0.29  | 0.31  |      |      |      |      | 0.3 | 0.00 |
| O15381 | Nuclear valosin-containing protein-like<br>OS=Homo sapiens<br>GN=NVL<br>PE=1 SV=1 - [NVL_HUMAN]             | 0.27 | 0.25 | 0.24  | 0.38  |      |      |      |      | 0.3 | 0.00 |

|        |                                                                                                      |       |      |       |      |      |      |      |      |     |      |
|--------|------------------------------------------------------------------------------------------------------|-------|------|-------|------|------|------|------|------|-----|------|
| Q8TE73 | Dynein heavy chain 5, axonemal<br>OS=Homo sapiens<br>GN=DNAH5<br>PE=1 SV=3 - [DYH5_HUMAN]            | -0.16 | 0.40 | 0.16  | 0.73 | 0.23 | 0.28 | 0.31 | 0.35 | 0.3 | 0.01 |
| A8K0R7 | Zinc finger protein 839<br>OS=Homo sapiens<br>GN=ZNF839<br>PE=2 SV=1 - [ZN839_HUMAN]                 | 0.01  | 0.30 | 0.18  | 0.20 | 0.49 | 0.76 | 0.04 | 0.31 | 0.3 | 0.01 |
| P37275 | Zinc finger E-box-binding homeobox 1<br>OS=Homo sapiens<br>GN=ZEB1<br>PE=1 SV=2 - [ZEB1_HUMAN]       | 0.13  | 0.55 | -0.20 | 0.23 | 0.51 | 0.58 | 0.20 | 0.28 | 0.3 | 0.02 |
| P80188 | Neutrophil gelatinase-associated lipocalin<br>OS=Homo sapiens<br>GN=LCN2<br>PE=1 SV=2 - [NGAL_HUMAN] | 0.04  | 0.06 | 0.20  | 0.21 | 0.41 | 0.49 | 0.40 | 0.46 | 0.3 | 0.00 |
| P01773 | Ig heavy chain V-III region BUR<br>OS=Homo sapiens<br>PE=1 SV=1 - [HV312_HUMAN]                      | 0.19  | 0.51 | 0.10  | 0.42 | 0.21 | 0.30 | 0.24 | 0.31 | 0.3 | 0.00 |
| P05164 | Myeloperoxidase<br>OS=Homo sapiens<br>GN=MPO<br>PE=1 SV=1 - [PERM_HUMAN]                             | 0.08  | 0.06 | 0.03  | 0.00 | 0.51 | 0.53 | 0.51 | 0.56 | 0.3 | 0.02 |
| Q9Y2G1 | Myelin gene regulatory factor<br>OS=Homo sapiens<br>GN=MRF<br>PE=1 SV=3 - [MRF_HUMAN]                | 0.30  | 0.19 | 0.37  | 0.27 |      |      |      |      | 0.3 | 0.01 |

|        |                                                                                                                    |      |       |      |      |      |      |      |      |     |      |
|--------|--------------------------------------------------------------------------------------------------------------------|------|-------|------|------|------|------|------|------|-----|------|
| P03973 | Antileukoproteinasin<br>OS=Homo sapiens<br>GN=SLPI<br>PE=1 SV=2 - [SLPI_HUMAN]                                     |      |       |      |      | 0.23 | 0.22 | 0.34 | 0.33 | 0.3 | 0.00 |
| Q02818 | Nucleobindin-1<br>OS=Homo sapiens<br>GN=NUCB1<br>PE=1 SV=4 - [NUCB1_HUMAN]                                         |      |       |      |      | 0.17 | 0.21 | 0.35 | 0.39 | 0.3 | 0.01 |
| P40197 | Platelet glycoprotein V<br>OS=Homo sapiens<br>GN=GP5<br>PE=1 SV=1 - [GPV_HUMAN]                                    | 0.29 | 0.25  | 0.26 | 0.23 | 0.31 | 0.22 | 0.35 | 0.33 | 0.3 | 0.00 |
| Q5TIE3 | von Willebrand factor A domain-containing protein 5B1<br>OS=Homo sapiens<br>GN=VWA5B1<br>PE=1 SV=2 - [VW5B1_HUMAN] | 0.12 | -0.19 | 0.37 | 0.07 | 0.48 | 0.62 | 0.32 | 0.45 | 0.3 | 0.02 |
| P09486 | SPARC<br>OS=Homo sapiens<br>GN=SPARC<br>PE=1 SV=1 - [SPRC_HUMAN]                                                   | 0.49 | 0.41  | 0.40 | 0.37 | 0.16 | 0.14 | 0.15 | 0.12 | 0.3 | 0.00 |
| Q13023 | A-kinase anchor protein 6<br>OS=Homo sapiens<br>GN=AKAP6<br>PE=1 SV=3 - [AKAP6_HUMAN]                              | 0.48 | 0.73  | 0.12 | 0.38 | 0.13 | 0.14 | 0.13 | 0.13 | 0.3 | 0.01 |
| Q14574 | Desmocollin-3<br>OS=Homo sapiens<br>GN=DSC3<br>PE=1 SV=3 - [DSC3_HUMAN]                                            |      |       |      |      | 0.12 | 0.44 | 0.32 | 0.23 | 0.3 | 0.03 |

|        |                                                                                                          |       |      |       |       |      |      |       |      |      |      |
|--------|----------------------------------------------------------------------------------------------------------|-------|------|-------|-------|------|------|-------|------|------|------|
| P05997 | Collagen alpha-2(V) chain<br>OS=Homo sapiens<br>GN=COL5A2<br>PE=1 SV=3 - [CO5A2_HUMAN]                   | 0.32  | 0.08 | 0.48  | 0.23  |      |      |       | 0.3  | 0.05 |      |
| Q9Y620 | DNA repair and recombination protein RAD54B<br>OS=Homo sapiens<br>GN=RAD54B<br>PE=1 SV=1 - [RA54B_HUMAN] | 0.33  | 0.63 | 0.37  | 0.57  | 0.07 | 0.11 | 0.05  | 0.08 | 0.3  | 0.01 |
| Q8IVF2 | Protein AHNK2<br>OS=Homo sapiens<br>GN=AHNAK2<br>PE=1 SV=2 - [AHNK2_HUMAN]                               | 0.47  | 0.34 | 0.06  | -0.06 | 0.36 | 0.20 | 0.49  | 0.33 | 0.3  | 0.01 |
| Q14019 | Coactosin-like protein<br>OS=Homo sapiens<br>GN=COTL1<br>PE=1 SV=3 - [COTL1_HUMAN]                       | -0.04 | 0.13 | -0.08 | 0.14  | 0.64 | 0.57 | 0.39  | 0.42 | 0.3  | 0.03 |
| Q9NRY4 | Rho GTPase-activating protein 35<br>OS=Homo sapiens<br>GN=ARHGA<br>P35 PE=1 SV=2 - [RHG35_HUMAN]         | 0.10  | 0.30 | 0.00  | 0.20  | 0.67 | 0.61 | 0.18  | 0.12 | 0.3  | 0.01 |
| Q01459 | Di-N-acetylchitinase<br>OS=Homo sapiens<br>GN=CTBS<br>PE=1 SV=1 - [DIAC_HUMAN]                           | 0.48  | 0.34 | 0.54  | 0.36  | 0.14 | 0.20 | -0.07 | 0.18 | 0.3  | 0.01 |

|        |                                                                                                       |      |      |      |      |       |      |      |      |     |      |
|--------|-------------------------------------------------------------------------------------------------------|------|------|------|------|-------|------|------|------|-----|------|
| Q8IYE1 | Coiled-coil domain-containing protein 13<br>OS=Homo sapiens<br>GN=CCDC13<br>PE=2 SV=2 - [CCD13_HUMAN] |      |      |      |      | 0.27  | 0.30 | 0.24 | 0.27 | 0.3 | 0.00 |
| P05067 | Amyloid beta A4 protein<br>OS=Homo sapiens<br>GN=APP<br>PE=1 SV=3 - [A4_HUMAN]                        | 0.36 | 0.42 | 0.35 | 0.43 | 0.17  | 0.09 | 0.24 | 0.08 | 0.3 | 0.00 |
| Q8N6Q3 | CD177 antigen<br>OS=Homo sapiens<br>GN=CD177<br>PE=1 SV=2 - [CD177_HUMAN]                             | 0.44 | 0.46 | 0.51 | 0.55 | -0.06 | 0.02 | 0.06 | 0.15 | 0.3 | 0.02 |
| Q08554 | Desmocollin-1<br>OS=Homo sapiens<br>GN=DSC1<br>PE=1 SV=2 - [DSC1_HUMAN]                               | 0.40 | 0.28 | 0.38 | 0.26 | 0.27  | 0.26 | 0.14 | 0.15 | 0.3 | 0.00 |
| Q9P275 | Ubiquitin carboxyl-terminal hydrolase 36<br>OS=Homo sapiens<br>GN=USP36<br>PE=1 SV=3 - [UBP36_HUMAN]  | 0.23 | 0.23 | 0.30 | 0.30 |       |      |      |      | 0.3 | 0.00 |
| P11215 | Integrin alpha-M<br>OS=Homo sapiens<br>GN=ITGAM<br>PE=1 SV=2 - [ITAM_HUMAN]                           | 0.22 | 0.33 | 0.17 | 0.34 |       |      |      |      | 0.3 | 0.01 |
| P20807 | Calpain-3<br>OS=Homo sapiens<br>GN=CAPN3<br>PE=1 SV=2 - [CAN3_HUMAN]                                  | 0.07 | 0.19 | 0.33 | 0.47 |       |      |      |      | 0.3 | 0.05 |
| O00391 | Sulfhydryl oxidase 1<br>OS=Homo sapiens<br>GN=QSOX1<br>PE=1 SV=3 - [QSOX1_HUMAN]                      | 0.18 | 0.19 | 0.11 | 0.20 | 0.36  | 0.44 | 0.24 | 0.40 | 0.3 | 0.00 |

|        |                                                                                                                  |      |      |      |      |      |      |      |      |     |      |
|--------|------------------------------------------------------------------------------------------------------------------|------|------|------|------|------|------|------|------|-----|------|
| Q92625 | Ankyrin repeat and SAM domain-containing protein 1A<br>OS=Homo sapiens<br>GN=ANKS1A<br>PE=1 SV=4 - [ANS1A_HUMAN] |      |      |      |      | 0.15 | 0.28 | 0.27 | 0.36 | 0.3 | 0.01 |
| P19823 | Inter-alpha-trypsin inhibitor heavy chain H2<br>OS=Homo sapiens<br>GN=ITIH2<br>PE=1 SV=2 - [ITIH2_HUMAN]         | 0.16 | 0.19 | 0.25 | 0.26 | 0.29 | 0.30 | 0.32 | 0.32 | 0.3 | 0.00 |
| P08185 | Corticosteroid-binding globulin<br>OS=Homo sapiens<br>GN=SERPIN A6<br>PE=1 SV=1 - [CBG_HUMAN]                    | 0.38 | 0.42 | 0.37 | 0.41 | 0.17 | 0.17 | 0.08 | 0.09 | 0.3 | 0.00 |
| Q13620 | Cullin-4B<br>OS=Homo sapiens<br>GN=CUL4B<br>PE=1 SV=4 - [CUL4B_HUMAN]                                            | 0.30 | 0.09 | 0.43 | 0.22 |      |      |      |      | 0.3 | 0.04 |
| P03952 | Plasma kallikrein<br>OS=Homo sapiens<br>GN=KLKB1<br>PE=1 SV=1 - [KLKB1_HUMAN]                                    | 0.51 | 0.52 | 0.44 | 0.44 | 0.05 | 0.01 | 0.05 | 0.05 | 0.3 | 0.02 |
| Q13093 | Platelet-activating factor acetylhydrolase<br>OS=Homo sapiens<br>GN=PLA2G7<br>PE=1 SV=1 - [PAFA_HUMAN]           | 0.21 | 0.27 | 0.21 | 0.35 |      |      |      |      | 0.3 | 0.00 |

|        |                                                                                                                                                |      |      |       |      |      |      |      |      |     |      |
|--------|------------------------------------------------------------------------------------------------------------------------------------------------|------|------|-------|------|------|------|------|------|-----|------|
| P02775 | Platelet basic protein<br>OS=Homo sapiens<br>GN=PPBP<br>PE=1 SV=3 - [CXCL7_HUMAN]                                                              | 0.33 | 0.44 | 0.20  | 0.31 | 0.31 | 0.09 | 0.29 | 0.09 | 0.3 | 0.00 |
| P55145 | Mesencephalic astrocyte-derived neurotrophic factor<br>OS=Homo sapiens<br>GN=MANF<br>PE=1 SV=3 - [MANF_HUMAN]                                  |      |      |       |      | 0.30 | 0.43 | 0.08 | 0.22 | 0.3 | 0.04 |
| P01722 | Ig lambda chain V-VI region NIG-48<br>OS=Homo sapiens<br>PE=1 SV=1 - [LV602_HUMAN]                                                             | 0.09 | 0.23 | -0.02 | 0.12 | 0.15 | 0.13 | 0.68 | 0.66 | 0.3 | 0.03 |
| Q9Y216 | Ninein-like protein<br>OS=Homo sapiens<br>GN=NINL<br>PE=1 SV=2 - [NINL_HUMAN]                                                                  | 0.24 | 0.30 | 0.19  | 0.25 | 0.47 | 0.13 | 0.40 | 0.06 | 0.3 | 0.00 |
| A6NJ16 | Putative V-set and immunoglobulin domain-containing-like protein IGHV4OR15-8<br>OS=Homo sapiens<br>GN=IGHV4OR15-8<br>PE=5 SV=2 - [IV4F8_HUMAN] | 0.04 | 0.13 | 0.04  | 0.11 | 0.53 | 0.59 | 0.27 | 0.32 | 0.3 | 0.01 |
| P01023 | Alpha-2-macroglobulin<br>OS=Homo sapiens<br>GN=A2M<br>PE=1 SV=3 - [A2MG_HUMAN]                                                                 | 0.25 | 0.32 | 0.27  | 0.33 | 0.21 | 0.25 | 0.17 | 0.23 | 0.3 | 0.00 |

|        |                                                                                                   |      |      |      |      |       |      |       |      |      |      |
|--------|---------------------------------------------------------------------------------------------------|------|------|------|------|-------|------|-------|------|------|------|
| Q92743 | Serine protease HTRA1<br>OS=Homo sapiens<br>GN=HTRA1<br>PE=1 SV=1 - [HTRA1_HUMAN]                 | 0.27 | 0.18 | 0.32 | 0.24 |       |      |       | 0.3  | 0.00 |      |
| P07339 | Cathepsin D<br>OS=Homo sapiens<br>GN=CTSD<br>PE=1 SV=1 - [CATD_HUMAN]                             | 0.32 | 0.26 | 0.28 | 0.26 | 0.25  | 0.39 | 0.06  | 0.19 | 0.3  | 0.00 |
| A2VDJ0 | Transmembrane protein 131-like<br>OS=Homo sapiens<br>GN=KIAA0922<br>PE=1 SV=2 - [T131L_HUMAN]     |      |      |      |      | 0.42  | 0.33 | 0.17  | 0.08 | 0.3  | 0.04 |
| P15151 | Poliovirus receptor<br>OS=Homo sapiens<br>GN=PVR<br>PE=1 SV=2 - [PVR_HUMAN]                       | 0.49 | 0.38 | 0.46 | 0.41 | -0.09 | 0.04 | 0.08  | 0.23 | 0.3  | 0.01 |
| Q86XA9 | HEAT repeat-containing protein 5A<br>OS=Homo sapiens<br>GN=HEATR5A<br>PE=1 SV=2 - [HTR5A_HUMAN]   | 0.60 | 0.54 | 0.28 | 0.23 | 0.07  | 0.05 | 0.12  | 0.10 | 0.3  | 0.01 |
| P10720 | Platelet factor 4 variant<br>OS=Homo sapiens<br>GN=PF4V1<br>PE=1 SV=1 - [PF4V_HUMAN]              |      |      |      |      | 0.34  | 0.31 | 0.27  | 0.08 | 0.3  | 0.02 |
| P01778 | Ig heavy chain V-III region ZAP<br>OS=Homo sapiens<br>GN=HV317_HUMAN<br>PE=1 SV=1 - [HV317_HUMAN] | 0.47 | 0.50 | 0.36 | 0.49 | 0.04  | 0.19 | -0.09 | 0.03 | 0.2  | 0.02 |



|        |                                                                                                         |      |      |      |      |      |       |      |      |     |      |
|--------|---------------------------------------------------------------------------------------------------------|------|------|------|------|------|-------|------|------|-----|------|
| Q96MH7 | Uncharacterized protein C5orf34 OS=Homo sapiens GN=C5orf34 PE=2 SV=2 - [CE034_HUMAN]                    |      |      |      |      | 0.41 | 0.34  | 0.16 | 0.09 | 0.2 | 0.04 |
| Q15582 | Transforming growth factor-beta-induced protein ig-h3 OS=Homo sapiens GN=TGFBI PE=1 SV=1 - [BGH3_HUMAN] | 0.30 | 0.29 | 0.29 | 0.34 | 0.18 | 0.32  | 0.08 | 0.19 | 0.2 | 0.00 |
| O15123 | Angiopoietin-2 OS=Homo sapiens GN=ANGPT2 PE=1 SV=1 - [ANGP2_HUMAN]                                      | 0.24 | 0.24 | 0.25 | 0.26 |      |       |      |      | 0.2 | 0.00 |
| Q96NZ9 | Proline-rich acidic protein 1 OS=Homo sapiens GN=PRAP1 PE=2 SV=2 - [PRAP1_HUMAN]                        |      |      |      |      | 0.34 | 0.28  | 0.24 | 0.12 | 0.2 | 0.01 |
| P06276 | Cholinesterase OS=Homo sapiens GN=BCHE PE=1 SV=1 - [CHLE_HUMAN]                                         | 0.15 | 0.18 | 0.15 | 0.18 | 0.33 | 0.42  | 0.25 | 0.31 | 0.2 | 0.00 |
| P02788 | Lactotransferrin OS=Homo sapiens GN=LTF PE=1 SV=6 - [TRFL_HUMAN]                                        | 0.33 | 0.31 | 0.35 | 0.30 | 0.16 | 0.31  | 0.07 | 0.13 | 0.2 | 0.00 |
| Q5VWT5 | Uncharacterized protein C1orf168 OS=Homo sapiens GN=C1orf168 PE=2 SV=1 - [CA168_HUMAN]                  | 0.49 | 0.31 | 0.52 | 0.35 | 0.14 | -0.26 | 0.40 | 0.00 | 0.2 | 0.04 |

|        |                                                                                                      |      |      |      |      |      |      |       |      |     |      |
|--------|------------------------------------------------------------------------------------------------------|------|------|------|------|------|------|-------|------|-----|------|
| O95466 | Formin-like protein 1<br>OS=Homo sapiens<br>GN=FMNL1<br>PE=1 SV=3 - [FMNL_HUMAN]                     | 0.27 | 0.26 | 0.09 | 0.08 | 0.48 | 0.63 | -0.01 | 0.15 | 0.2 | 0.01 |
| O75122 | CLIP-associating protein 2<br>OS=Homo sapiens<br>GN=CLASP2<br>PE=1 SV=2 - [CLAP2_HUMAN]              | 0.23 | 0.22 | 0.26 | 0.27 |      |      |       |      | 0.2 | 0.00 |
| Q9Y5C1 | Angiopoietin-related protein 3<br>OS=Homo sapiens<br>GN=ANGPTL3<br>PE=1 SV=1 - [ANGL3_HUMAN]         | 0.40 | 0.56 | 0.36 | 0.40 | 0.05 | 0.01 | 0.11  | 0.05 | 0.2 | 0.01 |
| Q9UBX5 | Fibulin-5<br>OS=Homo sapiens<br>GN=FBLN5<br>PE=1 SV=1 - [FBLN5_HUMAN]                                | 0.18 | 0.08 | 0.22 | 0.14 | 0.31 | 0.35 | 0.31  | 0.35 | 0.2 | 0.00 |
| P01137 | Transforming growth factor beta-1<br>OS=Homo sapiens<br>GN=TGFB1<br>PE=1 SV=2 - [TGFB1_HUMAN]        | 0.23 | 0.15 | 0.29 | 0.16 | 0.23 | 0.18 | 0.36  | 0.34 | 0.2 | 0.00 |
| Q96RU2 | Ubiquitin carboxyl-terminal hydrolase 28<br>OS=Homo sapiens<br>GN=USP28<br>PE=1 SV=1 - [UBP28_HUMAN] | 0.25 | 0.28 | 0.19 | 0.24 |      |      |       |      | 0.2 | 0.00 |
| O14786 | Neuropilin-1<br>OS=Homo sapiens<br>GN=NRP1<br>PE=1 SV=3 - [NRP1_HUMAN]                               | 0.21 | 0.29 | 0.09 | 0.29 | 0.17 | 0.30 | 0.22  | 0.32 | 0.2 | 0.00 |

|        |                                                                                                                  |      |      |      |      |      |      |      |      |     |      |
|--------|------------------------------------------------------------------------------------------------------------------|------|------|------|------|------|------|------|------|-----|------|
| Q15052 | Rho guanine nucleotide exchange factor 6<br>OS=Homo sapiens<br>GN=ARHG6<br>F6 PE=1<br>SV=2 - [ARHG6_HUMAN]       | 0.01 | 0.07 | 0.23 | 0.29 | 0.48 | 0.23 | 0.39 | 0.20 | 0.2 | 0.00 |
| P01871 | Ig mu chain C region<br>OS=Homo sapiens<br>GN=IGHM<br>PE=1 SV=3 - [IGHM_HUMAN]                                   | 0.31 | 0.38 | 0.34 | 0.42 | 0.16 | 0.15 | 0.03 | 0.09 | 0.2 | 0.00 |
| Q9UHG3 | Prenylcysteine oxidase 1<br>OS=Homo sapiens<br>GN=PCYOX1<br>PE=1 SV=3 - [PCYOX_HUMAN]                            | 0.16 | 0.36 | 0.01 | 0.24 | 0.27 | 0.39 | 0.17 | 0.28 | 0.2 | 0.00 |
| Q96GE4 | Centrosomal protein of 95 kDa<br>OS=Homo sapiens<br>GN=CEP95<br>PE=1 SV=1 - [CEP95_HUMAN]                        |      |      |      |      | 0.30 | 0.28 | 0.18 | 0.16 | 0.2 | 0.01 |
| O15371 | Eukaryotic translation initiation factor 3 subunit D<br>OS=Homo sapiens<br>GN=EIF3D<br>PE=1 SV=1 - [EIF3D_HUMAN] | 0.22 | 0.30 | 0.28 | 0.36 | 0.00 |      | 0.24 |      | 0.2 | 0.01 |
| P48444 | Coatamer subunit delta<br>OS=Homo sapiens<br>GN=ARCN1<br>PE=1 SV=1 - [COPD_HUMAN]                                |      |      |      |      | 0.23 | 0.18 | 0.28 | 0.23 | 0.2 | 0.00 |
| Q68DN1 | Uncharacterized protein C2orf16<br>OS=Homo sapiens<br>GN=C2orf16<br>PE=1 SV=3 - [CB016_HUMAN]                    | 0.33 | 0.37 | 0.08 | 0.13 |      |      |      |      | 0.2 | 0.05 |

|        |                                                                                                                   |      |       |      |      |      |      |      |      |     |      |
|--------|-------------------------------------------------------------------------------------------------------------------|------|-------|------|------|------|------|------|------|-----|------|
| P36980 | Complement factor H-related protein 2<br>OS=Homo sapiens<br>GN=CFHR2<br>PE=1 SV=1 - [FHR2_HUMAN]                  | 0.32 | 0.26  | 0.27 | 0.12 | 0.32 | 0.16 | 0.27 | 0.09 | 0.2 | 0.00 |
| O75368 | SH3 domain-binding glutamic acid-rich-like protein<br>OS=Homo sapiens<br>GN=SH3BG<br>RL PE=1 SV=1 - [SH3L1_HUMAN] |      |       |      |      | 0.23 | 0.30 | 0.20 | 0.17 | 0.2 | 0.00 |
| Q6UX73 | UPF0764 protein<br>C16orf89<br>OS=Homo sapiens<br>GN=C16orf89<br>PE=2 SV=2 - [CP089_HUMAN]                        | 0.11 | 0.19  | 0.26 | 0.34 |      |      |      |      | 0.2 | 0.02 |
| Q8N655 | Uncharacterized protein<br>C10orf12<br>OS=Homo sapiens<br>GN=C10orf12<br>PE=1 SV=1 - [CJ012_HUMAN]                | 0.11 | 0.13  | 0.12 | 0.15 | 0.12 | 0.42 | 0.23 | 0.52 | 0.2 | 0.01 |
| Q13813 | Spectrin alpha chain, brain<br>OS=Homo sapiens<br>GN=SPTAN1<br>PE=1 SV=3 - [SPTA2_HUMAN]                          | 0.32 | 0.32  | 0.33 | 0.33 | 0.20 | 0.24 | 0.00 | 0.05 | 0.2 | 0.00 |
| Q9UJU6 | Drebrin-like protein<br>OS=Homo sapiens<br>GN=DBNL<br>PE=1 SV=1 - [DBNL_HUMAN]                                    | 0.00 | -0.06 | 0.12 | 0.08 | 0.35 | 0.48 | 0.32 | 0.51 | 0.2 | 0.02 |
| Q9H4A9 | Dipeptidase 2<br>OS=Homo sapiens<br>GN=DPEP2<br>PE=1 SV=2 - [DPEP2_HUMAN]                                         | 0.03 | 0.01  | 0.14 | 0.07 | 0.30 | 0.35 | 0.46 | 0.43 | 0.2 | 0.01 |

|        |                                                                                                               |      |      |      |      |       |       |       |      |     |      |
|--------|---------------------------------------------------------------------------------------------------------------|------|------|------|------|-------|-------|-------|------|-----|------|
| Q6XUX3 | Dual serine/threonine and tyrosine protein kinase<br>OS=Homo sapiens<br>GN=DSTYK<br>PE=1 SV=2 - [DUSTY_HUMAN] | 0.58 | 0.33 | 0.55 | 0.32 | -0.10 | -0.07 | 0.07  | 0.11 | 0.2 | 0.05 |
| P09172 | Dopamine beta-hydroxylase<br>OS=Homo sapiens<br>GN=DBH<br>PE=1 SV=3 - [DOPO_HUMAN]                            | 0.23 | 0.25 | 0.18 | 0.25 | 0.18  | 0.37  | 0.06  | 0.25 | 0.2 | 0.00 |
| P01760 | Ig heavy chain V-I region WOL<br>OS=Homo sapiens<br>PE=1 SV=1 - [HV105_HUMAN]                                 | 0.24 | 0.44 | 0.44 | 0.49 | -0.01 | 0.08  | -0.08 | 0.14 | 0.2 | 0.03 |
| P01702 | Ig lambda chain V-I region NIG-64<br>OS=Homo sapiens<br>PE=1 SV=1 - [LV104_HUMAN]                             | 0.17 | 0.02 | 0.28 | 0.20 | 0.44  | 0.39  | 0.14  | 0.10 | 0.2 | 0.00 |
| Q4ZHG4 | Fibronectin type III domain-containing protein 1<br>OS=Homo sapiens<br>GN=FNDC1<br>PE=1 SV=4 - [FNDC1_HUMAN]  | 0.18 | 0.11 | 0.47 | 0.43 | 0.25  | 0.13  | 0.14  | 0.02 | 0.2 | 0.01 |
| P00748 | Coagulation factor XII<br>OS=Homo sapiens<br>GN=F12<br>PE=1 SV=3 - [FA12_HUMAN]                               | 0.40 | 0.35 | 0.41 | 0.40 | 0.07  | -0.03 | 0.11  | 0.03 | 0.2 | 0.01 |
| Q9NVD3 | SET domain-containing protein 4<br>OS=Homo sapiens<br>GN=SETD4<br>PE=2 SV=1 - [SETD4_HUMAN]                   |      |      |      |      | 0.23  | 0.26  | 0.18  | 0.20 | 0.2 | 0.00 |

|        |                                                                                                                               |      |      |      |      |      |      |      |      |     |      |
|--------|-------------------------------------------------------------------------------------------------------------------------------|------|------|------|------|------|------|------|------|-----|------|
| A6NI47 | Putative POTE ankyrin domain family member M<br>OS=Homo sapiens<br>GN=POTEM<br>PE=3 SV=2 - [POTEM_HUMAN]                      | 0.17 | 0.42 | 0.01 | 0.27 | 0.29 | 0.19 | 0.24 | 0.14 | 0.2 | 0.00 |
| P51178 | 1-phosphatidylinositol 4,5-bisphosphate phosphodiesterase delta-1<br>OS=Homo sapiens<br>GN=PLCD1<br>PE=1 SV=2 - [PLCD1_HUMAN] | 0.23 | 0.21 | 0.21 | 0.21 |      |      |      |      | 0.2 | 0.00 |
| P54802 | Alpha-N-acetylglucosaminidase<br>OS=Homo sapiens<br>GN=NAGLU<br>PE=1 SV=2 - [ANAG_HUMAN]                                      | 0.12 | 0.11 | 0.16 | 0.17 | 0.25 | 0.23 | 0.43 | 0.25 | 0.2 | 0.00 |
| Q92608 | Dedicator of cytokinesis protein 2<br>OS=Homo sapiens<br>GN=DOCK2<br>PE=1 SV=2 - [DOCK2_HUMAN]                                | 0.21 | 0.12 | 0.26 | 0.20 | 0.34 | 0.03 | 0.48 | 0.08 | 0.2 | 0.00 |
| P11277 | Spectrin beta chain, erythrocyte<br>OS=Homo sapiens<br>GN=SPTB<br>PE=1 SV=5 - [SPTB1_HUMAN]                                   | 0.12 | 0.29 | 0.08 | 0.36 |      |      |      |      | 0.2 | 0.05 |
| Q96HC4 | PDZ and LIM domain protein 5<br>OS=Homo sapiens<br>GN=PDLIM5<br>PE=1 SV=5 - [PDLI5_HUMAN]                                     |      |      |      |      | 0.26 | 0.19 | 0.24 | 0.16 | 0.2 | 0.00 |

|        |                                                                                                                              |      |      |      |      |       |      |       |      |     |      |
|--------|------------------------------------------------------------------------------------------------------------------------------|------|------|------|------|-------|------|-------|------|-----|------|
| Q9HCF6 | Transient receptor potential cation channel subfamily M member 3<br>OS=Homo sapiens<br>GN=TRPM3<br>PE=2 SV=4 - [TRPM3_HUMAN] | 0.13 | 0.24 | 0.15 | 0.27 | 0.35  | 0.41 | 0.04  | 0.10 | 0.2 | 0.00 |
| P12931 | Proto-oncogene tyrosine-protein kinase Src<br>OS=Homo sapiens<br>GN=SRC<br>PE=1 SV=3 - [SRC_HUMAN]                           | 0.22 | 0.53 | 0.28 | 0.60 | -0.04 | 0.12 | -0.09 | 0.08 | 0.2 | 0.05 |
| Q86VM9 | Zinc finger CCCH domain-containing protein 18<br>OS=Homo sapiens<br>GN=ZC3H18<br>PE=1 SV=2 - [ZCH18_HUMAN]                   |      |      |      |      | 0.22  | 0.07 | 0.35  | 0.20 | 0.2 | 0.03 |
| P00450 | Ceruloplasmin<br>OS=Homo sapiens<br>GN=CP<br>PE=1 SV=1 - [CERU_HUMAN]                                                        | 0.17 | 0.21 | 0.17 | 0.22 | 0.26  | 0.28 | 0.15  | 0.24 | 0.2 | 0.00 |
| Q8NE35 | Cytoplasmic polyadenylation element-binding protein 3<br>OS=Homo sapiens<br>GN=CPEB3<br>PE=1 SV=2 - [CPEB3_HUMAN]            | 0.37 | 0.23 | 0.19 | 0.05 |       |      |       |      | 0.2 | 0.05 |
| O15067 | Phosphoribosylformylglycin amidine synthase<br>OS=Homo sapiens<br>GN=PFAS<br>PE=1 SV=4 - [PUR4_HUMAN]                        | 0.22 | 0.25 | 0.15 | 0.22 |       |      |       |      | 0.2 | 0.00 |

|        |                                                                                              |      |      |       |      |      |      |       |      |      |      |
|--------|----------------------------------------------------------------------------------------------|------|------|-------|------|------|------|-------|------|------|------|
| Q9UKK3 | Poly [ADP-ribose] polymerase 4<br>OS=Homo sapiens<br>GN=PARP4<br>PE=1 SV=3 - [PARP4_HUMAN]   | 0.15 | 0.24 | 0.18  | 0.27 |      |      |       | 0.2  | 0.00 |      |
| Q15848 | Adiponectin<br>OS=Homo sapiens<br>GN=ADIPOQ<br>PE=1 SV=1 - [ADIPO_HUMAN]                     | 0.27 | 0.35 | 0.34  | 0.37 | 0.09 | 0.18 | -0.02 | 0.08 | 0.2  | 0.01 |
| P01591 | Immunoglobulin J chain<br>OS=Homo sapiens<br>GN=IGJ<br>PE=1 SV=4 - [IGJ_HUMAN1]              | 0.23 | 0.15 | 0.37  | 0.30 | 0.19 | 0.12 | 0.20  | 0.10 | 0.2  | 0.00 |
| Q5VVJ2 | Histone H2A deubiquitinase MYSM1<br>OS=Homo sapiens<br>GN=MYSM1<br>PE=1 SV=1 - [MYSM1_HUMAN] | 0.02 | 0.25 | -0.04 | 0.19 | 0.40 | 0.46 | 0.11  | 0.27 | 0.2  | 0.01 |
| O00602 | Ficolin-1<br>OS=Homo sapiens<br>GN=FCN1<br>PE=1 SV=2 - [FCN1_HUMAN]                          | 0.12 | 0.08 | 0.18  | 0.14 | 0.09 | 0.26 | 0.31  | 0.48 | 0.2  | 0.00 |
| P05090 | Apolipoprotein D<br>OS=Homo sapiens<br>GN=APOD<br>PE=1 SV=1 - [APOD_HUMAN]                   | 0.22 | 0.11 | 0.20  | 0.10 | 0.25 | 0.31 | 0.20  | 0.25 | 0.2  | 0.00 |
| Q3ZCW2 | Galectin-related protein<br>OS=Homo sapiens<br>GN=LGALS1<br>PE=1 SV=2 - [LEGL_HUMAN]         | 0.06 | 0.54 | -0.16 | 0.21 | 0.33 | 0.26 | 0.27  | 0.13 | 0.2  | 0.03 |



|        |                                                                                                                |      |      |       |       |       |       |      |      |     |      |
|--------|----------------------------------------------------------------------------------------------------------------|------|------|-------|-------|-------|-------|------|------|-----|------|
| Q04756 | Hepatocyte growth factor activator<br>OS=Homo sapiens<br>GN=HGFA<br>PE=1 SV=1 - [HGFA_HUMAN]                   | 0.29 | 0.26 | 0.27  | 0.27  | 0.16  | 0.12  | 0.12 | 0.13 | 0.2 | 0.00 |
| P19652 | Alpha-1-acid glycoprotein 2<br>OS=Homo sapiens<br>GN=ORM2<br>PE=1 SV=2 - [A1AG2_HUMAN]                         | 0.18 | 0.12 | 0.23  | 0.14  | 0.31  | 0.15  | 0.32 | 0.18 | 0.2 | 0.00 |
| Q6ZWB6 | BTB/POZ domain-containing protein<br>KCTD8<br>OS=Homo sapiens<br>GN=KCTD8<br>PE=2 SV=1 - [KCTD8_HUMAN]         | 0.35 | 0.36 | 0.31  | 0.32  | 0.09  | -0.24 | 0.38 | 0.05 | 0.2 | 0.03 |
| Q15084 | Protein disulfide-isomerase A6<br>OS=Homo sapiens<br>GN=PDIA6<br>PE=1 SV=1 - [PDIA6_HUMAN]                     |      |      |       |       | 0.08  | 0.22  | 0.19 | 0.33 | 0.2 | 0.03 |
| Q8IUC8 | Polypeptide N-acetylgalactosaminyltransferase 13<br>OS=Homo sapiens<br>GN=GALNT13<br>PE=2 SV=2 - [GLT13_HUMAN] | 0.23 | 0.38 | -0.18 | -0.02 | 0.34  | 0.24  | 0.33 | 0.30 | 0.2 | 0.02 |
| Q12851 | Mitogen-activated protein kinase kinase kinase 2<br>OS=Homo sapiens<br>GN=MAP4K2<br>PE=1 SV=2 - [M4K2_HUMAN]   | 0.39 | 0.00 | 0.48  | 0.11  | -0.10 | 0.17  | 0.14 | 0.42 | 0.2 | 0.03 |

|        |                                                                                                          |       |      |       |      |      |      |      |      |     |      |
|--------|----------------------------------------------------------------------------------------------------------|-------|------|-------|------|------|------|------|------|-----|------|
| Q13094 | Lymphocyte cytosolic protein 2<br>OS=Homo sapiens<br>GN=LCP2<br>PE=1 SV=1 - [LCP2_HUMAN]                 | 0.11  | 0.43 | 0.02  | 0.34 | 0.15 | 0.22 | 0.14 | 0.20 | 0.2 | 0.00 |
| P11226 | Mannose-binding protein C<br>OS=Homo sapiens<br>GN=MBL2<br>PE=1 SV=2 - [MBL2_HUMAN]                      | 0.14  | 0.28 | 0.16  | 0.33 | 0.22 | 0.18 | 0.18 | 0.12 | 0.2 | 0.00 |
| Q14847 | LIM and SH3 domain protein 1<br>OS=Homo sapiens<br>GN=LASP1<br>PE=1 SV=2 - [LASP1_HUMAN]                 |       |      |       |      | 0.29 | 0.07 | 0.31 | 0.13 | 0.2 | 0.05 |
| O95866 | Protein G6b<br>OS=Homo sapiens<br>GN=G6B<br>PE=1 SV=1 - [G6B_HUMAN]                                      |       |      |       |      | 0.20 | 0.23 | 0.19 | 0.18 | 0.2 | 0.00 |
| P51816 | AF4/FMR2 family member 2<br>OS=Homo sapiens<br>GN=AFF2<br>PE=1 SV=4 - [AFF2_HUMAN]                       | -0.05 | 0.43 | -0.08 | 0.42 | 0.27 | 0.19 | 0.12 | 0.28 | 0.2 | 0.02 |
| Q13332 | Receptor-type tyrosine-protein phosphatase S<br>OS=Homo sapiens<br>GN=PTPRS<br>PE=1 SV=3 - [PTPRS_HUMAN] | 0.26  | 0.20 | 0.17  | 0.16 |      |      |      |      | 0.2 | 0.00 |
| P19827 | Inter-alpha-trypsin inhibitor heavy chain H1<br>OS=Homo sapiens<br>GN=ITIH1<br>PE=1 SV=3 - [ITIH1_HUMAN] | 0.12  | 0.14 | 0.14  | 0.14 | 0.19 | 0.30 | 0.19 | 0.33 | 0.2 | 0.00 |

|        |                                                                                                                                          |      |      |      |      |      |      |       |      |     |      |
|--------|------------------------------------------------------------------------------------------------------------------------------------------|------|------|------|------|------|------|-------|------|-----|------|
| Q9H8L6 | Multimerin-2<br>OS=Homo sapiens<br>GN=MMRN2<br>PE=1 SV=2 -<br>[MMRN2_HUMAN]                                                              | 0.29 | 0.18 | 0.53 | 0.46 | 0.05 | 0.07 | -0.03 | 0.02 | 0.2 | 0.03 |
| P34096 | Ribonuclease 4<br>OS=Homo sapiens<br>GN=RNASE4<br>PE=1 SV=3 -<br>[RNASE4_HUMAN]                                                          |      |      |      |      | 0.29 | 0.11 | 0.18  | 0.20 | 0.2 | 0.01 |
| Q76LX8 | A disintegrin and metalloproteinase with thrombospondin motifs 13<br>OS=Homo sapiens<br>GN=ADAMT S13<br>PE=1 SV=1 -<br>[ADAMT S13_HUMAN] | 0.26 | 0.31 | 0.18 | 0.21 | 0.29 | 0.01 | 0.23  | 0.05 | 0.2 | 0.00 |
| P20827 | Ephrin-A1<br>OS=Homo sapiens<br>GN=EFNA1<br>PE=1 SV=2 -<br>[EFNA1_HUMAN]                                                                 |      |      |      |      | 0.17 | 0.20 | 0.18  | 0.21 | 0.2 | 0.00 |
| Q92954 | Proteoglycan 4<br>OS=Homo sapiens<br>GN=PRG4<br>PE=1 SV=2 -<br>[PRG4_HUMAN]                                                              | 0.20 | 0.24 | 0.19 | 0.28 | 0.25 | 0.12 | 0.20  | 0.05 | 0.2 | 0.00 |
| Q9UJC5 | SH3 domain-binding glutamic acid-rich-like protein 2<br>OS=Homo sapiens<br>GN=SH3BG RL2<br>PE=1 SV=2 -<br>[SH3BG RL2_HUMAN]              |      |      |      |      | 0.22 | 0.18 | 0.23  | 0.13 | 0.2 | 0.00 |
| Q9H1B5 | Xylosyltransferase 2<br>OS=Homo sapiens<br>GN=XYLT2<br>PE=2 SV=2 -<br>[XYLT2_HUMAN]                                                      | 0.22 | 0.19 | 0.18 | 0.16 |      |      |       |      | 0.2 | 0.00 |

|        |                                                                                                             |      |       |      |      |      |       |      |      |     |      |
|--------|-------------------------------------------------------------------------------------------------------------|------|-------|------|------|------|-------|------|------|-----|------|
| P28799 | Granulins<br>OS=Homo sapiens<br>GN=GRN<br>PE=1 SV=2 - [GRN_HUMAN]                                           | 0.07 | 0.09  | 0.24 | 0.26 | 0.20 | 0.22  | 0.21 | 0.21 | 0.2 | 0.00 |
| Q96A00 | Protein phosphatase 1 regulatory subunit 14A<br>OS=Homo sapiens<br>GN=PPP1R14A<br>PE=1 SV=1 - [PP14A_HUMAN] |      |       |      |      | 0.30 | 0.20  | 0.19 | 0.05 | 0.2 | 0.04 |
| Q92547 | DNA topoisomerase 2-binding protein 1<br>OS=Homo sapiens<br>GN=TOPBP1<br>PE=1 SV=3 - [TOPB1_HUMAN]          | 0.10 | 0.13  | 0.24 | 0.27 |      |       |      |      | 0.2 | 0.02 |
| P04196 | Histidine-rich glycoprotein<br>OS=Homo sapiens<br>GN=HRG<br>PE=1 SV=1 - [HRG_HUMAN]                         | 0.36 | 0.29  | 0.37 | 0.30 | 0.05 | -0.02 | 0.06 | 0.04 | 0.2 | 0.02 |
| Q9UK61 | Protein FAM208A<br>OS=Homo sapiens<br>GN=FAM208A<br>PE=1 SV=3 - [F208A_HUMAN]                               | 0.13 | -0.08 | 0.23 | 0.02 | 0.51 | 0.25  | 0.31 | 0.05 | 0.2 | 0.03 |
| Q8NA96 | Putative uncharacterized protein FLJ35723<br>OS=Homo sapiens<br>PE=5 SV=2 - [YE027_HUMAN]                   | 0.10 | 0.23  | 0.13 | 0.26 |      |       |      |      | 0.2 | 0.02 |
| P0CG05 | Ig lambda-2 chain C regions<br>OS=Homo sapiens<br>GN=IGLC2<br>PE=1 SV=1 - [LAC2_HUMAN]                      | 0.15 | 0.06  | 0.17 | 0.08 | 0.29 | 0.36  | 0.11 | 0.22 | 0.2 | 0.00 |

|        |                                                                                                      |      |      |      |      |      |      |       |       |     |      |
|--------|------------------------------------------------------------------------------------------------------|------|------|------|------|------|------|-------|-------|-----|------|
| P05543 | Thyroxine-binding globulin<br>OS=Homo sapiens<br>GN=SERPIN A7 PE=1<br>SV=2 - [THBG_HUMAN]            | 0.33 | 0.38 | 0.30 | 0.37 | 0.06 | 0.07 | -0.07 | -0.01 | 0.2 | 0.03 |
| P01762 | Ig heavy chain V-III region TRO<br>OS=Homo sapiens<br>PE=1 SV=1 - [HV301_HUMAN]                      | 0.23 | 0.27 | 0.33 | 0.25 | 0.06 | 0.08 | 0.03  | 0.17  | 0.2 | 0.00 |
| Q9BX66 | Sorbin and SH3 domain-containing protein 1<br>OS=Homo sapiens<br>GN=SORBS1 PE=1 SV=3 - [SRBS1_HUMAN] |      |      |      |      | 0.15 | 0.29 | 0.06  | 0.20  | 0.2 | 0.04 |
| Q6ISB3 | Grainyhead-like protein 2 homolog<br>OS=Homo sapiens<br>GN=GRHL2 PE=1 SV=1 - [GRHL2_HUMAN]           |      |      |      |      | 0.13 | 0.05 | 0.31  | 0.22  | 0.2 | 0.05 |
| P60983 | Glia maturation factor beta<br>OS=Homo sapiens<br>GN=GMFB PE=1 SV=2 - [GMFB_HUMAN]                   |      |      |      |      | 0.24 | 0.18 | 0.11  | 0.17  | 0.2 | 0.01 |
| Q9HD89 | Resistin<br>OS=Homo sapiens<br>GN=RETN PE=2 SV=1 - [RETN_HUMAN]                                      | 0.11 | 0.01 | 0.10 | 0.01 | 0.34 | 0.23 | 0.35  | 0.24  | 0.2 | 0.01 |
| P00734 | Prothrombin<br>OS=Homo sapiens<br>GN=F2 PE=1 SV=2 - [THRB_HUMAN]                                     | 0.14 | 0.09 | 0.12 | 0.09 | 0.23 | 0.24 | 0.23  | 0.24  | 0.2 | 0.00 |
| O95445 | Apolipoprotein M<br>OS=Homo sapiens<br>GN=APOM PE=1 SV=2 - [APOM_HUMAN]                              | 0.04 | 0.01 | 0.07 | 0.08 | 0.33 | 0.29 | 0.28  | 0.28  | 0.2 | 0.01 |

|        |                                                                                                                                      |      |      |      |      |      |       |      |       |     |      |
|--------|--------------------------------------------------------------------------------------------------------------------------------------|------|------|------|------|------|-------|------|-------|-----|------|
| P01009 | Alpha-1-antitrypsin<br>OS=Homo sapiens<br>GN=SERPINA1 PE=1 SV=3 -<br>[A1AT_HUMAN]                                                    | 0.28 | 0.25 | 0.29 | 0.25 | 0.09 | 0.07  | 0.06 | 0.08  | 0.2 | 0.00 |
| Q9Y2V0 | Uncharacterized protein<br>C15orf41<br>OS=Homo sapiens<br>GN=C15orf41 PE=2 SV=2 -<br>[CO041_HUMAN]                                   | 0.19 | 0.04 | 0.25 | 0.19 |      |       |      |       | 0.2 | 0.04 |
| P15509 | Granulocyte-macrophage colony-stimulating factor receptor subunit alpha<br>OS=Homo sapiens<br>GN=CSF2RA PE=1 SV=1 -<br>[CSF2R_HUMAN] | 0.21 | 0.27 | 0.23 | 0.30 | 0.07 | 0.12  | 0.04 | 0.09  | 0.2 | 0.00 |
| Q01581 | Hydroxymethylglutaryl-CoA synthase, cytoplasmic<br>OS=Homo sapiens<br>GN=HMGCS1 PE=1 SV=2 -<br>[HMCS1_HUMAN]                         | 0.22 | 0.21 | 0.01 | 0.00 | 0.21 | 0.37  | 0.07 | 0.24  | 0.2 | 0.01 |
| Q9BZQ8 | Protein Niban<br>OS=Homo sapiens<br>GN=FAM129A PE=1 SV=1 -<br>[NIBAN_HUMAN]                                                          | 0.13 | 0.21 | 0.35 | 0.43 | 0.24 | -0.04 | 0.17 | -0.15 | 0.2 | 0.04 |
| P01719 | Ig lambda chain V-V region DEL<br>OS=Homo sapiens<br>PE=1 SV=1 -<br>[LV501_HUMAN]                                                    | 0.15 | 0.23 | 0.12 | 0.20 | 0.18 | 0.04  | 0.26 | 0.15  | 0.2 | 0.00 |

|        |                                                                                                                |      |      |      |      |      |      |      |      |     |      |
|--------|----------------------------------------------------------------------------------------------------------------|------|------|------|------|------|------|------|------|-----|------|
| P33908 | Mannosyl-oligosaccharide 1,2-alpha-mannosidase<br>IA OS=Homo sapiens<br>GN=MAN1A1<br>PE=1 SV=3 - [MA1A1_HUMAN] | 0.03 | 0.03 | 0.11 | 0.07 | 0.33 | 0.38 | 0.14 | 0.21 | 0.2 | 0.01 |
| P01040 | Cystatin-A<br>OS=Homo sapiens<br>GN=CSTA<br>PE=1 SV=1 - [CYTA_HUMAN]                                           |      |      |      |      | 0.24 | 0.12 | 0.20 | 0.07 | 0.2 | 0.03 |
| O43866 | CD5 antigen-like<br>OS=Homo sapiens<br>GN=CD5L<br>PE=1 SV=1 - [CD5L_HUMAN]                                     | 0.12 | 0.09 | 0.16 | 0.12 | 0.20 | 0.23 | 0.20 | 0.14 | 0.2 | 0.00 |
| Q8IZP9 | G-protein coupled receptor 64<br>OS=Homo sapiens<br>GN=GPR64<br>PE=1 SV=2 - [GPR64_HUMAN]                      | 0.12 | 0.14 | 0.17 | 0.20 |      |      |      |      | 0.2 | 0.00 |
| Q14623 | Indian hedgehog protein<br>OS=Homo sapiens<br>GN=IHH<br>PE=1 SV=4 - [IHH_HUMAN]                                | 0.11 | 0.07 | 0.10 | 0.05 | 0.15 | 0.32 | 0.14 | 0.31 | 0.2 | 0.00 |
| O00273 | DNA fragmentation factor subunit alpha<br>OS=Homo sapiens<br>GN=DFFA<br>PE=1 SV=1 - [DFFA_HUMAN]               |      |      |      |      | 0.11 | 0.25 | 0.21 | 0.06 | 0.2 | 0.04 |

|        |                                                                                                              |      |      |      |      |      |      |       |      |     |      |
|--------|--------------------------------------------------------------------------------------------------------------|------|------|------|------|------|------|-------|------|-----|------|
| O95602 | DNA-directed RNA polymerase I subunit RPA1<br>OS=Homo sapiens<br>GN=POLR1A<br>PE=1 SV=2 - [RPA1_HUMAN]       |      |      |      |      | 0.22 | 0.13 | 0.16  | 0.11 | 0.2 | 0.01 |
| P02787 | Serotransferrin<br>OS=Homo sapiens<br>GN=TF PE=1 SV=3 - [TRFE_HUMAN]                                         | 0.31 | 0.25 | 0.31 | 0.25 | 0.04 | 0.03 | 0.01  | 0.04 | 0.2 | 0.01 |
| Q99558 | Mitogen-activated protein kinase kinase kinase 14<br>OS=Homo sapiens<br>GN=MAP3K14 PE=1 SV=2 - [M3K14_HUMAN] | 0.10 | 0.21 | 0.10 | 0.21 |      |      |       |      | 0.2 | 0.02 |
| P04114 | Apolipoprotein B-100<br>OS=Homo sapiens<br>GN=APOB<br>PE=1 SV=2 - [APOB_HUMAN]                               | 0.23 | 0.27 | 0.22 | 0.28 | 0.06 | 0.14 | -0.02 | 0.04 | 0.2 | 0.01 |
| P10643 | Complement component C7<br>OS=Homo sapiens<br>GN=C7 PE=1 SV=2 - [CO7_HUMAN]                                  | 0.28 | 0.25 | 0.25 | 0.23 | 0.06 | 0.09 | 0.01  | 0.05 | 0.2 | 0.01 |
| P02749 | Beta-2-glycoprotein 1<br>OS=Homo sapiens<br>GN=APOH<br>PE=1 SV=3 - [APOH_HUMAN]                              | 0.21 | 0.13 | 0.20 | 0.13 | 0.12 | 0.15 | 0.16  | 0.12 | 0.2 | 0.00 |



|        |                                                                                                                     |       |       |       |       |       |       |       |       |      |      |
|--------|---------------------------------------------------------------------------------------------------------------------|-------|-------|-------|-------|-------|-------|-------|-------|------|------|
| Q8NDG6 | Putative ATP-dependent RNA helicase TDRD9<br>OS=Homo sapiens<br>GN=TDRD9<br>PE=2 SV=3 - [TDRD9_HUMAN]               |       |       |       |       | 0.18  | 0.04  | 0.22  | 0.17  | 0.2  | 0.03 |
| P04004 | Vitronectin<br>OS=Homo sapiens<br>GN=VTN<br>PE=1 SV=1 - [VTNC_HUMAN]                                                | 0.15  | 0.16  | 0.15  | 0.14  | 0.13  | 0.16  | 0.14  | 0.18  | 0.2  | 0.00 |
| Q14678 | KN motif and ankyrin repeat domain-containing protein 1<br>OS=Homo sapiens<br>GN=KANK1<br>PE=1 SV=3 - [KANK1_HUMAN] |       |       |       |       | -0.25 | -0.17 | -0.13 | -0.05 | -0.2 | 0.04 |
| P49908 | Selenoprotein P<br>OS=Homo sapiens<br>GN=SEPP1<br>PE=1 SV=3 - [SEPP1_HUMAN]                                         | -0.08 | -0.05 | -0.10 | -0.08 | -0.21 | -0.24 | -0.22 | -0.23 | -0.2 | 0.00 |
| P49257 | Protein ERGIC-53<br>OS=Homo sapiens<br>GN=LMAN1<br>PE=1 SV=2 - [LMAN1_HUMAN]                                        | -0.11 | -0.16 | -0.08 | -0.14 | 0.01  | -0.15 | -0.21 | -0.37 | -0.2 | 0.01 |
| P41222 | Prostaglandin-H2 D-isomerase<br>OS=Homo sapiens<br>GN=PTGDS<br>PE=1 SV=1 - [PTGDS_HUMAN]                            | -0.17 | -0.25 | -0.27 | -0.33 | 0.06  | -0.07 | -0.02 | -0.14 | -0.2 | 0.01 |
| P28062 | Proteasome subunit beta type-8<br>OS=Homo sapiens<br>GN=PSMB8<br>PE=1 SV=3 - [PSB8_HUMAN]                           | -0.30 | -0.25 | -0.18 | -0.12 | -0.20 | -0.15 | -0.05 | 0.00  | -0.2 | 0.00 |

|        |                                                                                                                      |       |       |       |       |       |       |       |       |      |      |
|--------|----------------------------------------------------------------------------------------------------------------------|-------|-------|-------|-------|-------|-------|-------|-------|------|------|
| P01877 | Ig alpha-2<br>chain C<br>region<br>OS=Homo<br>sapiens<br>GN=IGHA2<br>PE=1 SV=3 -<br>[IGHA2_HUM<br>AN]                | 0.01  | 0.01  | -0.04 | -0.04 | -0.27 | -0.29 | -0.31 | -0.32 | -0.2 | 0.02 |
| P05155 | Plasma<br>protease C1<br>inhibitor<br>OS=Homo<br>sapiens<br>GN=SERPIN<br>G1 PE=1<br>SV=2 -<br>[IC1_HUMAN<br>1]       | -0.08 | -0.09 | -0.09 | -0.11 | -0.23 | -0.18 | -0.29 | -0.18 | -0.2 | 0.00 |
| P17900 | Ganglioside<br>GM2<br>activator<br>OS=Homo<br>sapiens<br>GN=GM2A<br>PE=1 SV=4 -<br>[SAP3_HUM<br>AN]                  |       |       |       |       | -0.08 | -0.11 | -0.21 | -0.24 | -0.2 | 0.03 |
| P00558 | Phosphoglyc<br>erate kinase<br>1 OS=Homo<br>sapiens<br>GN=PGK1<br>PE=1 SV=3 -<br>[PGK1_HUM<br>AN]                    | -0.16 | -0.38 | -0.11 | -0.27 | -0.27 | -0.08 | -0.09 | 0.10  | -0.2 | 0.02 |
| P14618 | Pyruvate<br>kinase<br>isozymes<br>M1/M2<br>OS=Homo<br>sapiens<br>GN=PKM2<br>PE=1 SV=4 -<br>[KPYM_HUM<br>AN]          | -0.31 | -0.24 | -0.32 | -0.28 | -0.10 | -0.11 | 0.07  | 0.03  | -0.2 | 0.02 |
| P48637 | Glutathione<br>synthetase<br>OS=Homo<br>sapiens<br>GN=GSS<br>PE=1 SV=1 -<br>[GSHB_HUM<br>AN]                         | -0.15 | -0.16 | -0.16 | -0.17 |       |       |       |       | -0.2 | 0.00 |
| Q02985 | Complement<br>factor H-<br>related<br>protein 3<br>OS=Homo<br>sapiens<br>GN=CFHR3<br>PE=1 SV=2 -<br>[FHR3_HUM<br>AN] | -0.20 | -0.14 | -0.14 | -0.03 | -0.19 | -0.38 | -0.03 | -0.20 | -0.2 | 0.00 |

|        |                                                                                                        |       |       |       |       |       |       |       |       |      |      |
|--------|--------------------------------------------------------------------------------------------------------|-------|-------|-------|-------|-------|-------|-------|-------|------|------|
| Q03113 | Guanine nucleotide-binding protein subunit alpha-12 OS=Homo sapiens GN=GNA12 PE=1 SV=4 - [GNA12_HUMAN] | -0.39 | -0.17 | -0.35 | -0.12 | -0.25 | 0.07  | -0.21 | 0.11  | -0.2 | 0.04 |
| Q99439 | Calponin-2 OS=Homo sapiens GN=CNN2 PE=1 SV=4 - [CNN2_HUMAN]                                            | -0.33 | -0.35 | -0.34 | -0.35 | 0.10  | 0.08  | -0.01 | -0.12 | -0.2 | 0.05 |
| Q13495 | Mastermind-like domain-containing protein 1 OS=Homo sapiens GN=MAMLD1 PE=1 SV=2 - [MAMD1_HUMAN]        |       |       |       |       | -0.16 | -0.18 | -0.15 | -0.17 | -0.2 | 0.00 |
| P15531 | Nucleoside diphosphate kinase A OS=Homo sapiens GN=NME1 PE=1 SV=1 - [NDKA_HUMAN]                       |       |       |       |       | -0.23 | -0.07 | -0.25 | -0.13 | -0.2 | 0.03 |
| Q03164 | Histone-lysine N-methyltransferase MLL OS=Homo sapiens GN=MLL PE=1 SV=5 - [MLL1_HUMAN]                 | -0.23 | -0.17 | -0.35 | -0.29 | -0.03 | 0.03  | -0.19 | -0.13 | -0.2 | 0.01 |
| P02647 | Apolipoprotein A-I OS=Homo sapiens GN=APOA1 PE=1 SV=1 - [APOA1_HUMAN]                                  | -0.25 | -0.35 | -0.24 | -0.34 | -0.03 | -0.07 | -0.02 | -0.06 | -0.2 | 0.01 |

|        |                                                                                                                                   |       |       |       |       |       |       |       |       |      |      |
|--------|-----------------------------------------------------------------------------------------------------------------------------------|-------|-------|-------|-------|-------|-------|-------|-------|------|------|
| Q96TA2 | ATP-dependent zinc metalloprotease YME1L1<br>OS=Homo sapiens<br>GN=YME1L1<br>PE=1 SV=2 - [YME1_HUMAN]                             | -0.11 | -0.13 | -0.22 | -0.24 |       |       |       |       | -0.2 | 0.01 |
| O76031 | ATP-dependent Clp protease ATP-binding subunit clpX-like, mitochondrial<br>OS=Homo sapiens<br>GN=CLPX<br>PE=1 SV=2 - [CLPX_HUMAN] | -0.24 | -0.14 | -0.23 | -0.11 |       |       |       |       | -0.2 | 0.01 |
| P02786 | Transferrin receptor protein 1<br>OS=Homo sapiens<br>GN=TFRC<br>PE=1 SV=2 - [TFR1_HUMAN]                                          | -0.08 | -0.07 | -0.09 | -0.09 | -0.28 | -0.26 | -0.29 | -0.27 | -0.2 | 0.00 |
| P20073 | Annexin A7<br>OS=Homo sapiens<br>GN=ANXA7<br>PE=1 SV=3 - [ANXA7_HUMAN]                                                            | -0.21 | -0.19 | -0.17 | -0.14 |       |       |       |       | -0.2 | 0.00 |
| Q9UHK0 | Nuclear fragile X mental retardation-interacting protein 1<br>OS=Homo sapiens<br>GN=NUFIP1<br>PE=1 SV=2 - [NUFP1_HUMAN]           | -0.08 | -0.06 | -0.16 | -0.13 | -0.36 | 0.03  | -0.53 | -0.14 | -0.2 | 0.03 |
| P60953 | Cell division control protein 42 homolog<br>OS=Homo sapiens<br>GN=CDC42<br>PE=1 SV=2 - [CDC42_HUMAN]                              | -0.42 | -0.38 | -0.40 | -0.35 | 0.10  | 0.01  | 0.03  | -0.06 | -0.2 | 0.05 |

|        |                                                                                                                 |       |       |       |       |       |       |       |       |      |      |
|--------|-----------------------------------------------------------------------------------------------------------------|-------|-------|-------|-------|-------|-------|-------|-------|------|------|
| Q9NZR2 | Low-density lipoprotein receptor-related protein 1B<br>OS=Homo sapiens<br>GN=LRP1B<br>PE=1 SV=2 - [LRP1B_HUMAN] | -0.16 | -0.19 | -0.13 | -0.15 | -0.33 | -0.21 | -0.27 | -0.03 | -0.2 | 0.00 |
| P42858 | Huntingtin<br>OS=Homo sapiens<br>GN=HTT<br>PE=1 SV=2 - [HD_HUMAN]                                               | -0.17 | -0.22 | -0.14 | -0.19 |       |       |       |       | -0.2 | 0.00 |
| Q9BS26 | Endoplasmic reticulum resident protein 44<br>OS=Homo sapiens<br>GN=ERP44<br>PE=1 SV=1 - [ERP44_HUMAN]           | -0.41 | -0.40 | -0.26 | -0.25 | 0.01  | -0.05 | -0.03 | -0.08 | -0.2 | 0.02 |
| Q6AHZ1 | Zinc finger protein 518A<br>OS=Homo sapiens<br>GN=ZNF518<br>A PE=1 SV=2 - [Z518A_HUMAN]                         | -0.41 | -0.25 | -0.45 | -0.28 | 0.03  | -0.10 | 0.06  | -0.07 | -0.2 | 0.03 |
| P04220 | Ig mu heavy chain disease protein<br>OS=Homo sapiens<br>PE=1 SV=1 - [MUCB_HUMAN]                                | -0.19 | -0.27 | -0.16 | -0.12 |       |       |       |       | -0.2 | 0.01 |
| Q6KC79 | Nipped-B-like protein<br>OS=Homo sapiens<br>GN=NIPBL<br>PE=1 SV=2 - [NIPBL_HUMAN]                               |       |       |       |       | -0.11 | -0.26 | -0.12 | -0.27 | -0.2 | 0.02 |
| P30086 | Phosphatidyl ethanolamine-binding protein 1<br>OS=Homo sapiens<br>GN=PEBP1<br>PE=1 SV=3 - [PEBP1_HUMAN]         | -0.10 | -0.22 | -0.17 | -0.27 | -0.08 | -0.20 | -0.16 | -0.28 | -0.2 | 0.00 |

|        |                                                                                                                                |       |       |       |       |       |       |       |       |      |      |
|--------|--------------------------------------------------------------------------------------------------------------------------------|-------|-------|-------|-------|-------|-------|-------|-------|------|------|
| Q8N3S3 | Putative homeodomain transcription factor 2<br>OS=Homo sapiens<br>GN=PHTF2<br>PE=2 SV=2 - [PHTF2_HUMAN]                        | -0.29 | 0.10  | -0.34 | 0.06  | -0.36 | -0.48 | -0.03 | -0.16 | -0.2 | 0.04 |
| O94979 | Protein transport protein Sec31A<br>OS=Homo sapiens<br>GN=SEC31A<br>PE=1 SV=3 - [SC31A_HUMAN]                                  |       |       |       |       | -0.14 | -0.30 | -0.07 | -0.25 | -0.2 | 0.03 |
| Q86VB7 | Scavenger receptor cysteine-rich type 1 protein M130<br>OS=Homo sapiens<br>GN=CD163<br>PE=1 SV=2 - [C163A_HUMAN]               | -0.15 | -0.16 | -0.28 | -0.32 | -0.10 | -0.28 | -0.10 | -0.10 | -0.2 | 0.00 |
| P55290 | Cadherin-13<br>OS=Homo sapiens<br>GN=CDH13<br>PE=1 SV=1 - [CAD13_HUMAN]                                                        | -0.10 | -0.28 | -0.15 | -0.33 | -0.21 | -0.28 | -0.04 | -0.13 | -0.2 | 0.00 |
| Q96M69 | Leucine-rich repeat and guanylate kinase domain-containing protein<br>OS=Homo sapiens<br>GN=LRGUK<br>PE=1 SV=1 - [LRGUK_HUMAN] | -0.08 | -0.18 | -0.18 | -0.28 | -0.58 | -0.22 | -0.19 | 0.17  | -0.2 | 0.03 |
| P61158 | Actin-related protein 3<br>OS=Homo sapiens<br>GN=ACTR3<br>PE=1 SV=3 - [ARP3_HUMAN]                                             | -0.33 | -0.46 | -0.07 | -0.12 | 0.11  | -0.38 | 0.09  | -0.40 | -0.2 | 0.04 |

|        |                                                                                               |       |       |       |       |       |       |       |       |      |      |
|--------|-----------------------------------------------------------------------------------------------|-------|-------|-------|-------|-------|-------|-------|-------|------|------|
| P62993 | Growth factor receptor-bound protein 2 OS=Homo sapiens GN=GRB2 PE=1 SV=1 - [GRB2_HUMAN]       |       |       |       |       | -0.24 | -0.21 | -0.19 | -0.15 | -0.2 | 0.00 |
| P60174 | Triosephosphate isomerase OS=Homo sapiens GN=TP11 PE=1 SV=3 - [TPIS_HUMAN]                    | -0.12 | -0.27 | -0.06 | -0.25 | -0.23 | -0.22 | -0.22 | -0.21 | -0.2 | 0.00 |
| Q68CR7 | Leucine-rich repeat-containing protein 66 OS=Homo sapiens GN=LRRC66 PE=2 SV=1 - [LRC66_HUMAN] |       |       |       |       | -0.21 | -0.30 | -0.10 | -0.18 | -0.2 | 0.02 |
| P08134 | Rho-related GTP-binding protein RhoC OS=Homo sapiens GN=RHOC PE=1 SV=1 - [RHOC_HUMAN]         | -0.20 | -0.12 | -0.21 | -0.13 | -0.20 | -0.16 | -0.33 | -0.24 | -0.2 | 0.00 |
| Q70J99 | Protein unc-13 homolog D OS=Homo sapiens GN=UNC13D PE=1 SV=1 - [UN13D_HUMAN]                  | -0.30 | -0.55 | 0.16  | -0.08 | 0.02  | -0.20 | -0.21 | -0.44 | -0.2 | 0.05 |
| P35555 | Fibrillin-1 OS=Homo sapiens GN=FBN1 PE=1 SV=3 - [FBN1_HUMAN]                                  | -0.03 | -0.16 | -0.13 | -0.24 | 0.05  | -0.27 | -0.26 | -0.57 | -0.2 | 0.02 |
| O43795 | Unconventional myosin-Ib OS=Homo sapiens GN=MYO1B PE=2 SV=3 - [MYO1B_HUMAN]                   |       |       |       |       | -0.25 | -0.18 | -0.22 | -0.16 | -0.2 | 0.00 |

|        |                                                                                                                             |       |       |       |       |       |       |       |       |      |      |
|--------|-----------------------------------------------------------------------------------------------------------------------------|-------|-------|-------|-------|-------|-------|-------|-------|------|------|
| Q8IY37 | Probable ATP-dependent RNA helicase DHX37<br>OS=Homo sapiens<br>GN=DHX37<br>PE=1 SV=1 - [DHX37_HUMAN]                       | -0.38 | -0.04 | -0.43 | -0.28 | 0.00  | -0.10 | -0.2  | 0.04  |      |      |
| Q9UBP4 | Dickkopf-related protein 3<br>OS=Homo sapiens<br>GN=DKK3<br>PE=1 SV=2 - [DKK3_HUMAN]                                        | -0.08 | -0.30 | -0.12 | -0.33 |       |       | -0.2  | 0.05  |      |      |
| P06744 | Glucose-6-phosphate isomerase<br>OS=Homo sapiens<br>GN=GPI<br>PE=1 SV=4 - [G6PI_HUMAN]                                      | -0.11 | -0.22 | -0.20 | -0.29 |       |       | -0.2  | 0.01  |      |      |
| O14498 | Immunoglobulin superfamily containing leucine-rich repeat protein<br>OS=Homo sapiens<br>GN=ISLR<br>PE=1 SV=1 - [ISLR_HUMAN] | -0.02 | -0.08 | 0.05  | -0.06 | -0.40 | -0.28 | -0.47 | -0.39 | -0.2 | 0.02 |
| P00568 | Adenylate kinase isoenzyme 1<br>OS=Homo sapiens<br>GN=AK1<br>PE=1 SV=3 - [KAD1_HUMAN]                                       | -0.29 | -0.56 | -0.25 | -0.51 | 0.02  | 0.08  | -0.11 | -0.04 | -0.2 | 0.04 |
| P46531 | Neurogenic locus notch homolog protein 1<br>OS=Homo sapiens<br>GN=NOTCH1<br>PE=1 SV=4 - [NOTC1_HUMAN]                       | -0.12 | -0.18 | -0.24 | -0.30 |       |       | -0.2  | 0.01  |      |      |



|        |                                                                                                                        |       |       |       |       |       |       |       |       |      |      |
|--------|------------------------------------------------------------------------------------------------------------------------|-------|-------|-------|-------|-------|-------|-------|-------|------|------|
| P52565 | Rho GDP-dissociation inhibitor 1<br>OS=Homo sapiens<br>GN=ARHGDI<br>APE=1 SV=3<br>-<br>[GDIR1_HUMAN]                   |       |       |       |       | -0.21 | -0.19 | -0.22 | -0.23 | -0.2 | 0.00 |
| Q6R327 | Rapamycin-insensitive companion of mTOR<br>OS=Homo sapiens<br>GN=RICTOR<br>PE=1 SV=1 -<br>[RICTR_HUMAN]                | -0.14 | -0.26 | -0.18 | -0.28 |       |       |       |       | -0.2 | 0.01 |
| P00451 | Coagulation factor VIII<br>OS=Homo sapiens<br>GN=F8<br>PE=1 SV=1 -<br>[FA8_HUMAN]                                      | -0.08 | -0.20 | -0.03 | -0.13 | -0.45 | -0.64 | 0.00  | -0.18 | -0.2 | 0.03 |
| Q9Y5Y7 | Lymphatic vessel endothelial hyaluronic acid receptor 1<br>OS=Homo sapiens<br>GN=LYVE1<br>PE=1 SV=2 -<br>[LYVE1_HUMAN] | -0.23 | -0.13 | -0.24 | -0.11 | -0.12 | -0.22 | -0.30 | -0.36 | -0.2 | 0.00 |
| Q16445 | Gamma-aminobutyric acid receptor subunit alpha-6<br>OS=Homo sapiens<br>GN=GABRA6<br>PE=2 SV=2 -<br>[GBRA6_HUMAN]       | -0.51 | -0.55 | -0.10 | -0.14 | -0.41 | -0.09 | -0.19 | 0.25  | -0.2 | 0.05 |
| P01861 | Ig gamma-4 chain C region<br>OS=Homo sapiens<br>GN=IGHG4<br>PE=1 SV=1 -<br>[IGHG4_HUMAN]                               | -0.20 | -0.18 | -0.18 | -0.17 | -0.32 | -0.16 | -0.35 | -0.19 | -0.2 | 0.00 |

|        |                                                                                                         |       |       |       |       |       |       |       |       |      |      |
|--------|---------------------------------------------------------------------------------------------------------|-------|-------|-------|-------|-------|-------|-------|-------|------|------|
| P30044 | Peroxiredoxin-5, mitochondrial<br>OS=Homo sapiens<br>GN=PRDX5<br>PE=1 SV=4 - [PRDX5_HUMAN]              | -0.41 | -0.48 | -0.30 | -0.36 | -0.09 | 0.06  | -0.21 | 0.02  | -0.2 | 0.02 |
| Q15365 | Poly(rC)-binding protein 1<br>OS=Homo sapiens<br>GN=PCBP1<br>PE=1 SV=2 - [PCBP1_HUMAN]                  | -0.05 | -0.22 | -0.11 | -0.26 | -0.39 | -0.06 | -0.51 | -0.18 | -0.2 | 0.01 |
| P47895 | Aldehyde dehydrogenase family 1 member A3<br>OS=Homo sapiens<br>GN=ALDH1A3<br>PE=1 SV=2 - [AL1A3_HUMAN] | -0.21 | -0.35 | -0.32 | -0.44 | 0.07  | -0.18 | -0.05 | -0.30 | -0.2 | 0.01 |
| Q9H871 | Protein RMD5 homolog A<br>OS=Homo sapiens<br>GN=RMND5A<br>PE=1 SV=1 - [RMD5A_HUMAN]                     | -0.29 | -0.35 | -0.13 | -0.14 |       |       |       |       | -0.2 | 0.03 |
| O43819 | Protein SCO2 homolog, mitochondrial<br>OS=Homo sapiens<br>GN=SCO2<br>PE=1 SV=3 - [SCO2_HUMAN]           |       |       |       |       | -0.36 | -0.22 | -0.24 | -0.09 | -0.2 | 0.03 |
| Q6PIV7 | Solute carrier family 25 member 34<br>OS=Homo sapiens<br>GN=SLC25A34<br>PE=2 SV=1 - [S2534_HUMAN]       |       |       |       |       | -0.29 | -0.18 | -0.28 | -0.17 | -0.2 | 0.01 |

|        |                                                                                                                                      |       |       |       |       |       |       |       |       |      |      |
|--------|--------------------------------------------------------------------------------------------------------------------------------------|-------|-------|-------|-------|-------|-------|-------|-------|------|------|
| O00299 | Chloride intracellular channel protein 1<br>OS=Homo sapiens<br>GN=CLIC1<br>PE=1 SV=4 - [CLIC1_HUMAN]                                 | -0.26 | -0.23 | -0.34 | -0.30 | -0.20 | -0.15 | -0.17 | -0.18 | -0.2 | 0.00 |
| P25054 | Adenomatous polyposis coli protein<br>OS=Homo sapiens<br>GN=APC<br>PE=1 SV=2 - [APC_HUMAN]                                           |       |       |       |       | -0.25 | -0.06 | -0.39 | -0.21 | -0.2 | 0.04 |
| O75592 | Probable E3 ubiquitin-protein ligase MYCBP2<br>OS=Homo sapiens<br>GN=MYCBP2<br>PE=1 SV=3 - [MYCB2_HUMAN]                             | -0.17 | -0.03 | -0.20 | -0.05 | -0.43 | -0.33 | -0.37 | -0.27 | -0.2 | 0.00 |
| P20702 | Integrin alpha-X<br>OS=Homo sapiens<br>GN=ITGAX<br>PE=1 SV=3 - [ITAX_HUMAN]                                                          | 0.12  | 0.08  | -0.05 | -0.07 | -0.46 | -0.44 | -0.53 | -0.51 | -0.2 | 0.05 |
| Q5VT97 | Rho GTPase-activating protein SYDE2<br>OS=Homo sapiens<br>GN=SYDE2<br>PE=1 SV=2 - [SYDE2_HUMAN]                                      | -0.26 | -0.10 | -0.37 | -0.21 |       |       |       |       | -0.2 | 0.02 |
| A1L4H1 | Soluble scavenger receptor cysteine-rich domain-containing protein SSC5D<br>OS=Homo sapiens<br>GN=SSC5D<br>PE=2 SV=3 - [SRCRL_HUMAN] | -0.15 | -0.26 | -0.28 | -0.24 |       |       |       |       | -0.2 | 0.00 |

|        |                                                                                                           |       |       |       |       |       |       |       |       |      |      |
|--------|-----------------------------------------------------------------------------------------------------------|-------|-------|-------|-------|-------|-------|-------|-------|------|------|
| Q9H0G5 | Nuclear speckle splicing regulatory protein 1<br>OS=Homo sapiens<br>GN=NSRP1<br>PE=1 SV=1 - [NSRP1_HUMAN] | -0.07 | -0.21 | -0.28 | -0.40 |       |       |       | -0.2  | 0.04 |      |
| Q6P1X5 | Transcription initiation factor TFIID subunit 2<br>OS=Homo sapiens<br>GN=TAF2<br>PE=1 SV=3 - [TAF2_HUMAN] | -0.34 | -0.23 | -0.25 | -0.13 |       |       |       | -0.2  | 0.01 |      |
| P61224 | Ras-related protein Rap-1b<br>OS=Homo sapiens<br>GN=RAP1B<br>PE=1 SV=1 - [RAP1B_HUMAN]                    | -0.29 | -0.50 | -0.11 | -0.36 | -0.22 | -0.21 | 0.00  | -0.22 | -0.2 | 0.00 |
| Q96L92 | Sorting nexin-27<br>OS=Homo sapiens<br>GN=SNX27<br>PE=1 SV=2 - [SNX27_HUMAN]                              | 0.05  | -0.11 | 0.12  | -0.01 | -0.61 | -0.35 | -0.53 | -0.46 | -0.2 | 0.05 |
| Q9UL68 | Myelin transcription factor 1-like protein<br>OS=Homo sapiens<br>GN=MYT1L<br>PE=2 SV=3 - [MYT1L_HUMAN]    | -0.24 | -0.18 | -0.31 | -0.23 |       |       |       |       | -0.2 | 0.00 |
| P61764 | Syntaxin-binding protein 1<br>OS=Homo sapiens<br>GN=STXBP1<br>PE=1 SV=1 - [STXB1_HUMAN]                   | -0.18 | -0.31 | -0.57 | -0.64 | -0.04 | -0.24 | 0.13  | -0.07 | -0.2 | 0.04 |

|        |                                                                                                              |       |       |       |       |       |       |       |       |      |      |
|--------|--------------------------------------------------------------------------------------------------------------|-------|-------|-------|-------|-------|-------|-------|-------|------|------|
| Q6P1N0 | Coiled-coil and C2 domain-containing protein 1A<br>OS=Homo sapiens<br>GN=CC2D1A<br>PE=1 SV=1 - [C2D1A_HUMAN] | -0.17 | -0.16 | -0.06 | -0.04 | -0.39 | -0.38 | -0.36 | -0.36 | -0.2 | 0.00 |
| Q9NXP7 | Gypsy retrotransposon integrase-like protein 1<br>OS=Homo sapiens<br>GN=GIN1<br>PE=2 SV=3 - [GIN1_HUMAN]     | -0.49 | 0.11  | -0.64 | -0.03 | -0.28 | -0.43 | -0.02 | -0.16 | -0.2 | 0.03 |
| P20774 | Mimecan<br>OS=Homo sapiens<br>GN=OGN<br>PE=1 SV=1 - [MIME_HUMAN]                                             | -0.09 | -0.13 | -0.10 | -0.13 | -0.28 | -0.28 | -0.48 | -0.48 | -0.2 | 0.00 |
| P08107 | Heat shock 70 kDa protein 1A/1B<br>OS=Homo sapiens<br>GN=HSPA1A<br>PE=1 SV=5 - [HSP71_HUMAN]                 | -0.06 | -0.05 | -0.15 | -0.14 | -0.50 | -0.37 | -0.42 | -0.29 | -0.2 | 0.00 |
| Q7KZ85 | Transcription elongation factor SPT6<br>OS=Homo sapiens<br>GN=SUPT6H<br>PE=1 SV=2 - [SPT6_HUMAN]             | -0.42 | -0.41 | -0.30 | -0.27 | -0.02 | -0.27 | -0.04 | -0.26 | -0.2 | 0.00 |
| Q9Y5E7 | Protocadherin beta-2<br>OS=Homo sapiens<br>GN=PCDHB2<br>PE=1 SV=1 - [PCDB2_HUMAN]                            | -0.24 | -0.24 | -0.24 | -0.24 | -0.31 | -0.28 | -0.23 | -0.21 | -0.2 | 0.00 |

|        |                                                                                                                |       |       |       |       |       |       |       |       |      |      |
|--------|----------------------------------------------------------------------------------------------------------------|-------|-------|-------|-------|-------|-------|-------|-------|------|------|
| P02452 | Collagen alpha-1(I) chain<br>OS=Homo sapiens<br>GN=COL1A1<br>PE=1 SV=5 - [CO1A1_HUMAN]                         | -0.12 | -0.38 | -0.11 | -0.35 | -0.21 | -0.42 | -0.03 | -0.37 | -0.2 | 0.00 |
| Q8NG41 | Neuropeptide B<br>OS=Homo sapiens<br>GN=NPB<br>PE=1 SV=1 - [NPB_HUMAN]                                         |       |       |       |       | -0.31 | -0.29 | -0.18 | -0.23 | -0.3 | 0.00 |
| Q9NVM6 | DnaJ homolog subfamily C member 17<br>OS=Homo sapiens<br>GN=DNAJC17<br>PE=1 SV=1 - [DJC17_HUMAN]               |       |       |       |       | -0.30 | -0.13 | -0.33 | -0.25 | -0.3 | 0.01 |
| O14793 | Growth/differentiation factor 8<br>OS=Homo sapiens<br>GN=MSTN<br>PE=1 SV=1 - [GDF8_HUMAN]                      |       |       |       |       | -0.32 | -0.34 | -0.17 | -0.18 | -0.3 | 0.01 |
| P16930 | Fumarylacetylacetase<br>OS=Homo sapiens<br>GN=FAH<br>PE=1 SV=2 - [FAAA_HUMAN]                                  | -0.17 | -0.21 | -0.14 | -0.15 | -0.36 | -0.29 | -0.40 | -0.33 | -0.3 | 0.00 |
| P01621 | Ig kappa chain V-III region NG9 (Fragment)<br>OS=Homo sapiens<br>PE=1 SV=1 - [KV303_HUMAN]                     | -0.12 | -0.16 | -0.49 | -0.41 | -0.28 | -0.35 | -0.11 | -0.13 | -0.3 | 0.00 |
| Q9BYB0 | SH3 and multiple ankyrin repeat domains protein 3<br>OS=Homo sapiens<br>GN=SHANK3<br>PE=1 SV=2 - [SHAN3_HUMAN] | -0.41 | -0.68 | -0.13 | -0.40 | -0.21 | 0.10  | -0.31 | -0.01 | -0.3 | 0.02 |

|        |                                                                                                        |       |       |       |       |       |       |       |       |      |      |
|--------|--------------------------------------------------------------------------------------------------------|-------|-------|-------|-------|-------|-------|-------|-------|------|------|
| P17858 | 6-phosphofructokinase, liver type<br>OS=Homo sapiens<br>GN=PFKL<br>PE=1 SV=6 - [K6PL_HUMAN]            | -0.31 | -0.19 | -0.36 | -0.18 |       |       |       |       | -0.3 | 0.01 |
| P11021 | 78 kDa glucose-regulated protein<br>OS=Homo sapiens<br>GN=HSPA5<br>PE=1 SV=2 - [GRP78_HUMAN]           | -0.08 | -0.20 | -0.07 | -0.12 | -0.42 | -0.47 | -0.36 | -0.37 | -0.3 | 0.00 |
| P05093 | Steroid 17-alpha-hydroxylase/17,20 lyase<br>OS=Homo sapiens<br>GN=CYP17A1<br>PE=1 SV=1 - [CP17A_HUMAN] | -0.30 | 0.29  | -0.59 | 0.00  | -0.39 | -0.39 | -0.43 | -0.33 | -0.3 | 0.03 |
| Q8NBJ4 | Golgi membrane protein 1<br>OS=Homo sapiens<br>GN=GOLM1<br>PE=1 SV=1 - [GOLM1_HUMAN]                   | -0.41 | -0.36 | -0.25 | -0.20 | -0.01 | -0.39 | -0.07 | -0.45 | -0.3 | 0.00 |
| P04083 | Annexin A1<br>OS=Homo sapiens<br>GN=ANXA1<br>PE=1 SV=2 - [ANXA1_HUMAN]                                 |       |       |       |       | -0.27 | -0.27 | -0.27 | -0.26 | -0.3 | 0.00 |
| P30041 | Peroxiredoxin-6<br>OS=Homo sapiens<br>GN=PRDX6<br>PE=1 SV=3 - [PRDX6_HUMAN]                            | -0.37 | -0.58 | -0.34 | -0.45 | -0.08 | -0.10 | -0.14 | -0.09 | -0.3 | 0.01 |
| P04438 | Ig heavy chain V-II region SESS<br>OS=Homo sapiens<br>PE=2 SV=1 - [HV208_HUMAN]                        | -0.31 | -0.37 | -0.33 | -0.29 | -0.26 | -0.08 | -0.37 | -0.17 | -0.3 | 0.00 |

|        |                                                                                                                            |       |       |       |       |       |       |       |       |      |      |
|--------|----------------------------------------------------------------------------------------------------------------------------|-------|-------|-------|-------|-------|-------|-------|-------|------|------|
| Q53GS9 | U4/U6.U5 tri-snRNP-associated protein 2<br>OS=Homo sapiens<br>GN=USP39<br>PE=1 SV=2 - [SNUT2_HUMAN]                        | -0.37 | -0.29 | -0.24 | -0.16 | -0.38 | -0.46 | -0.11 | -0.19 | -0.3 | 0.00 |
| P62873 | Guanine nucleotide-binding protein G(i)/G(s)/G(t) subunit beta-1<br>OS=Homo sapiens<br>GN=GNB1<br>PE=1 SV=3 - [GBB1_HUMAN] | -0.35 | -0.11 | -0.35 | -0.03 | -0.40 | -0.27 | -0.41 | -0.28 | -0.3 | 0.00 |
| O75385 | Serine/threonine-protein kinase ULK1<br>OS=Homo sapiens<br>GN=ULK1<br>PE=1 SV=2 - [ULK1_HUMAN]                             | -0.33 | -0.14 | -0.34 | -0.15 | -0.25 | -0.20 | -0.40 | -0.35 | -0.3 | 0.00 |
| Q96M20 | Uncharacterized protein C20orf152<br>OS=Homo sapiens<br>GN=C20orf152<br>PE=2 SV=2 - [CT152_HUMAN]                          | -0.61 | -0.74 | -0.17 | -0.30 | -0.38 | -0.18 | -0.05 | 0.21  | -0.3 | 0.04 |
| Q9NYU2 | UDP-glucose:glycoprotein glucosyltransferase 1<br>OS=Homo sapiens<br>GN=UGGT1<br>PE=1 SV=3 - [UGGT1_HUMAN]                 | -0.42 | -0.31 | -0.24 | -0.13 |       |       |       |       | -0.3 | 0.02 |
| O43592 | Exportin-T<br>OS=Homo sapiens<br>GN=XPOT<br>PE=1 SV=2 - [XPOT_HUMAN]                                                       |       |       |       |       | -0.23 | -0.25 | -0.30 | -0.33 | -0.3 | 0.00 |
| P37802 | Transgelin-2<br>OS=Homo sapiens<br>GN=TAGLN2<br>PE=1 SV=3 - [TAGLN2_HUMAN]                                                 | -0.45 | -0.51 | -0.47 | -0.53 | 0.01  | -0.15 | -0.03 | -0.12 | -0.3 | 0.01 |



|        |                                                                                                                            |       |       |       |       |       |       |       |       |      |      |
|--------|----------------------------------------------------------------------------------------------------------------------------|-------|-------|-------|-------|-------|-------|-------|-------|------|------|
| P26447 | Protein S100-A4<br>OS=Homo sapiens<br>GN=S100A4<br>PE=1 SV=1 - [S10A4_HUMAN]                                               | -0.41 | -0.29 | -0.35 | -0.21 | -0.23 | -0.05 | -0.42 | -0.28 | -0.3 | 0.00 |
| P10644 | cAMP-dependent protein kinase type I-alpha regulatory subunit<br>OS=Homo sapiens<br>GN=PRKAR1A<br>PE=1 SV=1 - [KAP0_HUMAN] |       |       |       |       | -0.14 | -0.42 | -0.14 | -0.42 | -0.3 | 0.04 |
| Q01518 | Adenylyl cyclase-associated protein 1<br>OS=Homo sapiens<br>GN=CAP1<br>PE=1 SV=5 - [CAP1_HUMAN]                            | -0.54 | -0.28 | -0.42 | -0.24 | -0.17 | -0.14 | -0.25 | -0.22 | -0.3 | 0.00 |
| Q93100 | Phosphorylase b kinase regulatory subunit beta<br>OS=Homo sapiens<br>GN=PHKB<br>PE=1 SV=3 - [KPBB_HUMAN]                   | -0.32 | -0.15 | -0.31 | -0.36 |       |       |       |       | -0.3 | 0.01 |
| O00592 | Podocalyxin<br>OS=Homo sapiens<br>GN=PODXL<br>PE=1 SV=2 - [PODXL_HUMAN]                                                    | -0.44 | -0.57 | -0.51 | -0.55 | -0.07 | -0.14 | 0.04  | -0.03 | -0.3 | 0.02 |
| Q8IWL3 | Iron-sulfur cluster co-chaperone protein HscB, mitochondrial<br>OS=Homo sapiens<br>GN=HSCB<br>PE=1 SV=3 - [HSC20_HUMAN]    | -0.29 | -0.36 | -0.21 | -0.27 |       |       |       |       | -0.3 | 0.00 |

|        |                                                                                                                              |       |       |       |       |       |       |       |       |      |      |
|--------|------------------------------------------------------------------------------------------------------------------------------|-------|-------|-------|-------|-------|-------|-------|-------|------|------|
| Q9H1A4 | Anaphase-promoting complex subunit 1<br>OS=Homo sapiens<br>GN=ANAPC1<br>PE=1 SV=1 - [APC1_HUMAN]                             | -0.59 | -0.33 | -0.69 | -0.38 | 0.08  | 0.30  | -0.44 | -0.23 | -0.3 | 0.05 |
| Q9BX84 | Transient receptor potential cation channel subfamily M member 6<br>OS=Homo sapiens<br>GN=TRPM6<br>PE=1 SV=2 - [TRPM6_HUMAN] | -0.47 | -0.03 | -0.32 | 0.17  | -0.07 | -0.36 | -0.46 | -0.74 | -0.3 | 0.03 |
| P51148 | Ras-related protein Rab-5C<br>OS=Homo sapiens<br>GN=RAB5C<br>PE=1 SV=2 - [RAB5C_HUMAN]                                       | -0.22 | -0.48 | -0.10 | -0.35 |       |       |       |       | -0.3 | 0.04 |
| P59910 | DnaJ homolog subfamily B member 13<br>OS=Homo sapiens<br>GN=DNAJB13<br>PE=2 SV=1 - [DJB13_HUMAN]                             | -0.47 | -0.67 | -0.09 | -0.27 | -0.37 | -0.42 | 0.02  | -0.04 | -0.3 | 0.01 |
| P06317 | Ig lambda chain V-VI region SUT<br>OS=Homo sapiens<br>PE=1 SV=1 - [LV603_HUMAN]                                              | -0.37 | -0.47 | -0.43 | -0.50 | -0.12 | -0.23 | -0.01 | -0.17 | -0.3 | 0.00 |
| Q9P2E9 | Ribosome-binding protein 1<br>OS=Homo sapiens<br>GN=RRBP1<br>PE=1 SV=4 - [RRBP1_HUMAN]                                       | -0.33 | 0.04  | -0.13 | 0.25  | -0.66 | -0.62 | -0.46 | -0.42 | -0.3 | 0.04 |

|        |                                                                                                         |       |       |       |       |       |       |       |       |      |      |
|--------|---------------------------------------------------------------------------------------------------------|-------|-------|-------|-------|-------|-------|-------|-------|------|------|
| Q5T9S5 | Coiled-coil domain-containing protein 18<br>OS=Homo sapiens<br>GN=CCDC18<br>PE=1 SV=1 - [CCD18_HUMAN]   | -0.23 | -0.28 | -0.14 | -0.17 | -0.41 | -0.21 | -0.54 | -0.35 | -0.3 | 0.00 |
| Q9UGM3 | Deleted in malignant brain tumors 1 protein<br>OS=Homo sapiens<br>GN=DMBT1<br>PE=1 SV=2 - [DMBT1_HUMAN] | -0.22 | -0.65 | -0.46 | -0.88 | 0.15  | 0.11  | -0.19 | -0.22 | -0.3 | 0.05 |
| Q6ZWJ8 | Kielin/chordin-like protein<br>OS=Homo sapiens<br>GN=KCP<br>PE=2 SV=2 - [KCP_HUMAN]                     |       |       |       |       | -0.17 | -0.25 | -0.34 | -0.42 | -0.3 | 0.01 |
| Q03591 | Complement factor H-related protein 1<br>OS=Homo sapiens<br>GN=CFHR1<br>PE=1 SV=2 - [FHR1_HUMAN]        | -0.04 | -0.39 | -0.14 | -0.60 | -0.35 | -0.26 | -0.35 | -0.23 | -0.3 | 0.00 |
| Q8IVL5 | Prolyl 3-hydroxylase 2<br>OS=Homo sapiens<br>GN=LEPREL1<br>PE=1 SV=1 - [P3H2_HUMAN]                     | -0.27 | -0.32 | -0.28 | -0.32 |       |       |       |       | -0.3 | 0.00 |
| P49747 | Cartilage oligomeric matrix protein<br>OS=Homo sapiens<br>GN=COMP<br>PE=1 SV=2 - [COMP_HUMAN]           | -0.30 | -0.38 | -0.27 | -0.33 | -0.41 | -0.25 | -0.32 | -0.15 | -0.3 | 0.00 |

|        |                                                                                                                          |       |       |       |       |       |      |       |      |      |      |
|--------|--------------------------------------------------------------------------------------------------------------------------|-------|-------|-------|-------|-------|------|-------|------|------|------|
| Q99650 | Oncostatin-M-specific receptor subunit beta<br>OS=Homo sapiens<br>GN=OSMR<br>PE=1 SV=1 - [OSMR_HUMAN]                    | -0.33 | -0.27 | -0.34 | -0.26 |       |      |       |      | -0.3 | 0.00 |
| P57071 | PR domain zinc finger protein 15<br>OS=Homo sapiens<br>GN=PRDM15<br>PE=2 SV=4 - [PRDM15_HUMAN]                           | -0.39 | -0.31 | -0.31 | -0.22 | -0.04 |      | -0.54 |      | -0.3 | 0.01 |
| P08514 | Integrin alpha IIb<br>OS=Homo sapiens<br>GN=ITGA2B<br>PE=1 SV=3 - [ITGA2B_HUMAN]                                         | -0.35 | -0.31 | -0.25 | -0.30 |       |      |       |      | -0.3 | 0.00 |
| Q9Y6D5 | Brefeldin A-inhibited guanine nucleotide-exchange protein 2<br>OS=Homo sapiens<br>GN=ARFGEF2<br>PE=1 SV=3 - [BIG2_HUMAN] | -0.32 | -0.18 | -0.32 | -0.39 |       |      |       |      | -0.3 | 0.01 |
| P10768 | S-formylglutathione hydrolase<br>OS=Homo sapiens<br>GN=ESD<br>PE=1 SV=2 - [ESTD_HUMAN]                                   | -0.68 | -0.67 | -0.63 | -0.61 | -0.02 | 0.03 | 0.05  | 0.09 | -0.3 | 0.05 |
| Q96N23 | Uncharacterized protein C12orf55<br>OS=Homo sapiens<br>GN=C12orf55<br>PE=2 SV=2 - [CL055_HUMAN]                          | -0.33 | -0.41 | -0.21 | -0.27 |       |      |       |      | -0.3 | 0.01 |

|        |                                                                                                              |       |       |       |       |       |       |       |       |      |      |
|--------|--------------------------------------------------------------------------------------------------------------|-------|-------|-------|-------|-------|-------|-------|-------|------|------|
| Q71H61 | Immunoglobulin-like domain-containing receptor 2<br>OS=Homo sapiens<br>GN=ILDR2<br>PE=2 SV=1 - [ILDR2_HUMAN] |       |       |       |       | -0.57 | -0.30 | -0.10 | -0.26 | -0.3 | 0.05 |
| P17174 | Aspartate aminotransferase, cytoplasmic<br>OS=Homo sapiens<br>GN=GOT1<br>PE=1 SV=3 - [AATC_HUMAN]            | -0.27 | -0.31 | -0.26 | -0.40 |       |       |       |       | -0.3 | 0.00 |
| Q9HBG6 | Intraflagellar transport protein 122 homolog<br>OS=Homo sapiens<br>GN=IFT122<br>PE=1 SV=2 - [IF122_HUMAN]    | -0.22 | -0.29 | -0.33 | -0.40 |       |       |       |       | -0.3 | 0.00 |
| P13639 | Elongation factor 2<br>OS=Homo sapiens<br>GN=EEF2<br>PE=1 SV=4 - [EF2_HUMAN]                                 | -0.05 | -0.04 | 0.10  | 0.12  | -0.68 | -0.51 | -0.80 | -0.64 | -0.3 | 0.05 |
| Q9Y4W6 | AFG3-like protein 2<br>OS=Homo sapiens<br>GN=AFG3L2<br>PE=1 SV=2 - [AFG32_HUMAN]                             | -0.45 | -0.64 | -0.36 | -0.54 | -0.06 | -0.03 | -0.22 | -0.20 | -0.3 | 0.01 |
| P06727 | Apolipoprotein A-IV<br>OS=Homo sapiens<br>GN=APOA4<br>PE=1 SV=3 - [APOA4_HUMAN]                              | -0.23 | -0.31 | -0.19 | -0.26 | -0.35 | -0.45 | -0.32 | -0.42 | -0.3 | 0.00 |
| P50502 | Hsc70-interacting protein<br>OS=Homo sapiens<br>GN=ST13<br>PE=1 SV=2 - [F10A1_HUMAN]                         | -0.54 | -0.58 | -0.61 | -0.63 | -0.08 | 0.01  | -0.05 | -0.04 | -0.3 | 0.02 |

|        |                                                                                                                                        |       |       |       |       |       |       |       |       |      |      |
|--------|----------------------------------------------------------------------------------------------------------------------------------------|-------|-------|-------|-------|-------|-------|-------|-------|------|------|
| P35542 | Serum amyloid A-4 protein<br>OS=Homo sapiens<br>GN=SAA4<br>PE=1 SV=2 - [SAA4_HUMAN]                                                    | -0.45 | -0.47 | -0.46 | -0.48 | -0.17 | -0.13 | -0.19 | -0.17 | -0.3 | 0.00 |
| Q96P48 | Arf-GAP with Rho-GAP domain, ANK repeat and PH domain-containing protein 1<br>OS=Homo sapiens<br>GN=ARAP1<br>PE=1 SV=3 - [ARAP1_HUMAN] | -0.13 | -0.17 | 0.01  | -0.03 | -0.83 | -0.88 | -0.22 | -0.27 | -0.3 | 0.04 |
| P04040 | Catalase<br>OS=Homo sapiens<br>GN=CAT<br>PE=1 SV=3 - [CATA_HUMAN]                                                                      | -0.32 | -0.37 | -0.53 | -0.58 | -0.12 | -0.19 | -0.15 | -0.28 | -0.3 | 0.00 |
| Q96G01 | Protein bicaudal D homolog 1<br>OS=Homo sapiens<br>GN=BICD1<br>PE=1 SV=3 - [BICD1_HUMAN]                                               |       |       |       |       | -0.18 | -0.12 | -0.53 | -0.46 | -0.3 | 0.05 |
| Q9UMR3 | T-box transcription factor TBX20<br>OS=Homo sapiens<br>GN=TBX20<br>PE=1 SV=4 - [TBX20_HUMAN]                                           | -0.24 | -0.50 | -0.21 | -0.46 | -0.10 | -0.25 | -0.34 | -0.49 | -0.3 | 0.00 |
| P29279 | Connective tissue growth factor<br>OS=Homo sapiens<br>GN=CTGF<br>PE=1 SV=2 - [CTGF_HUMAN]                                              | -0.60 | -0.66 | -0.57 | -0.61 | -0.10 | -0.08 | 0.05  | -0.03 | -0.3 | 0.02 |
| Q8NEE8 | Tetratricopeptide repeat protein 16<br>OS=Homo sapiens<br>GN=TTC16<br>PE=2 SV=2 - [TTC16_HUMAN]                                        | -0.39 | -0.44 | -0.22 | -0.26 |       |       |       |       | -0.3 | 0.01 |

|        |                                                                                                                   |       |       |       |       |       |       |       |       |      |      |
|--------|-------------------------------------------------------------------------------------------------------------------|-------|-------|-------|-------|-------|-------|-------|-------|------|------|
| Q15198 | Platelet-derived growth factor receptor-like protein<br>OS=Homo sapiens<br>GN=PDGFRL<br>PE=1 SV=1 - [PGFRL_HUMAN] |       |       |       |       | -0.19 | -0.47 | -0.18 | -0.48 | -0.3 | 0.03 |
| O43707 | Alpha-actinin-4<br>OS=Homo sapiens<br>GN=ACTN4<br>PE=1 SV=2 - [ACTN4_HUMAN]                                       | -0.22 | -0.44 | -0.23 | -0.43 |       |       |       |       | -0.3 | 0.01 |
| Q29RF7 | Sister chromatid cohesion protein PDS5 homolog A<br>OS=Homo sapiens<br>GN=PDS5A<br>PE=1 SV=1 - [PDS5A_HUMAN]      | -0.71 | -0.53 | -0.79 | -0.60 | 0.00  | -0.29 | 0.28  | -0.01 | -0.3 | 0.05 |
| Q9UKN7 | Unconventional myosin-XV<br>OS=Homo sapiens<br>GN=MYO15A<br>PE=1 SV=2 - [MYO15_HUMAN]                             | 0.21  | -0.17 | -0.21 | -0.51 | -0.60 | -0.66 | -0.18 | -0.51 | -0.3 | 0.02 |
| Q8NCA9 | Zinc finger protein 784<br>OS=Homo sapiens<br>GN=ZNF784<br>PE=2 SV=1 - [ZN784_HUMAN]                              | -0.26 | -0.43 | -0.24 | -0.39 |       |       |       |       | -0.3 | 0.01 |
| Q86UX7 | Fermitin family homolog 3<br>OS=Homo sapiens<br>GN=FERMT3<br>PE=1 SV=1 - [URP2_HUMAN]                             | -0.58 | -0.58 | -0.56 | -0.56 | -0.06 | 0.01  | -0.20 | -0.12 | -0.3 | 0.01 |

|        |                                                                                                                                   |       |       |       |       |       |       |       |       |      |      |
|--------|-----------------------------------------------------------------------------------------------------------------------------------|-------|-------|-------|-------|-------|-------|-------|-------|------|------|
| Q562R1 | Beta-actin-like protein 2<br>OS=Homo sapiens<br>GN=ACTBL2<br>PE=1 SV=2 - [ACTBL_HUMAN]                                            | -0.49 | -0.22 | -0.44 | -0.18 |       |       |       |       | -0.3 | 0.02 |
| Q9H3T3 | Semaphorin-6B<br>OS=Homo sapiens<br>GN=SEMA6B<br>PE=1 SV=4 - [SEM6B_HUMAN]                                                        | -0.23 | -0.56 | -0.22 | -0.53 | -0.42 | -0.10 | -0.48 | -0.16 | -0.3 | 0.00 |
| P00918 | Carbonic anhydrase 2<br>OS=Homo sapiens<br>GN=CA2<br>PE=1 SV=2 - [CAH2_HUMAN]                                                     | -0.07 | -0.31 | -0.21 | -0.41 | -0.40 | -0.38 | -0.46 | -0.44 | -0.3 | 0.00 |
| Q8TE56 | A disintegrin and metalloproteinase with thrombospondin motifs 17<br>OS=Homo sapiens<br>GN=ADAMT S17<br>PE=2 SV=2 - [ATS17_HUMAN] | -0.51 | -0.26 | -0.57 | -0.32 | -0.15 | -0.25 | -0.30 | -0.35 | -0.3 | 0.00 |
| O75820 | Zinc finger protein 189<br>OS=Homo sapiens<br>GN=ZNF189<br>PE=2 SV=2 - [ZN189_HUMAN]                                              |       |       |       |       | -0.47 | -0.25 | -0.43 | -0.21 | -0.3 | 0.01 |
| O60309 | Leucine-rich repeat-containing protein 37A3<br>OS=Homo sapiens<br>GN=LRRC37A3<br>PE=2 SV=2 - [L37A3_HUMAN]                        | -0.37 | -0.16 | -0.25 | -0.03 |       | -0.54 |       | -0.70 | -0.3 | 0.02 |



|        |                                                                                                                                      |       |       |       |       |       |       |       |       |      |      |
|--------|--------------------------------------------------------------------------------------------------------------------------------------|-------|-------|-------|-------|-------|-------|-------|-------|------|------|
| Q8NFD5 | AT-rich<br>interactive<br>domain-<br>containing<br>protein 1B<br>OS=Homo<br>sapiens<br>GN=ARID1B<br>PE=1 SV=2 -<br>[ARI1B_HUM<br>AN] | -0.30 | -0.24 | -0.45 | -0.39 |       |       |       |       | -0.3 | 0.01 |
| P01604 | Ig kappa<br>chain V-I<br>region Kue<br>OS=Homo<br>sapiens<br>PE=1 SV=1 -<br>[KV112_HUM<br>AN]                                        | -0.42 | -0.45 | -0.39 | -0.41 | -0.21 | -0.22 | -0.32 | -0.34 | -0.3 | 0.00 |
| O75094 | Slit homolog<br>3 protein<br>OS=Homo<br>sapiens<br>GN=SLIT3<br>PE=2 SV=3 -<br>[SLIT3_HUM<br>AN]                                      | -0.25 | -0.51 | -0.15 | -0.48 |       |       |       |       | -0.3 | 0.03 |
| P48145 | Neuropeptide<br>s B/W<br>receptor type<br>1 OS=Homo<br>sapiens<br>GN=NPBWR<br>1 PE=1 SV=2<br>-<br>[NPBW1_HU<br>MAN]                  |       |       |       |       | -0.25 | -0.24 | -0.49 | -0.44 | -0.4 | 0.01 |
| Q76G19 | PDZ domain-<br>containing<br>protein 4<br>OS=Homo<br>sapiens<br>GN=PDZD4<br>PE=2 SV=1 -<br>[PDZD4_HU<br>MAN]                         |       |       |       |       | -0.56 | -0.22 | -0.51 | -0.13 | -0.4 | 0.04 |
| Q60I27 | ALS2 C-<br>terminal-like<br>protein<br>OS=Homo<br>sapiens<br>GN=ALS2CL<br>PE=1 SV=1 -<br>[AL2CL_HU<br>MAN]                           |       |       |       |       | -0.45 | -0.59 | -0.12 | -0.27 | -0.4 | 0.04 |
| P35237 | Serpin B6<br>OS=Homo<br>sapiens<br>GN=SERPIN<br>B6 PE=1<br>SV=3 -<br>[SPB6_HUM<br>AN]                                                |       |       |       |       | -0.40 | -0.25 | -0.32 | -0.46 | -0.4 | 0.00 |

|        |                                                                                                                |       |       |       |       |       |       |       |       |      |      |
|--------|----------------------------------------------------------------------------------------------------------------|-------|-------|-------|-------|-------|-------|-------|-------|------|------|
| Q92616 | Translational activator GCN1<br>OS=Homo sapiens<br>GN=GCN1L1<br>PE=1 SV=6 - [GCN1L_HUMAN]                      | -0.05 | 0.09  | -0.18 | -0.05 | -0.57 | -1.10 | -0.33 | -0.69 | -0.4 | 0.04 |
| Q6UVK1 | Chondroitin sulfate proteoglycan 4<br>OS=Homo sapiens<br>GN=CSPG4<br>PE=1 SV=2 - [CSPG4_HUMAN]                 | -0.13 | -0.08 | -0.19 | -0.19 | -0.50 | -0.70 | -0.46 | -0.66 | -0.4 | 0.00 |
| Q96RW7 | Hemicentin-1<br>OS=Homo sapiens<br>GN=HMCN1<br>PE=1 SV=2 - [HMCN1_HUMAN]                                       |       |       |       |       | -0.35 | -0.56 | -0.17 | -0.38 | -0.4 | 0.02 |
| Q8IVV2 | Lipoxygenase homology domain-containing protein 1<br>OS=Homo sapiens<br>GN=LOXHD1<br>PE=2 SV=3 - [LOXH1_HUMAN] |       |       |       |       | -0.28 | -0.53 | -0.19 | -0.45 | -0.4 | 0.02 |
| P02735 | Serum amyloid A protein<br>OS=Homo sapiens<br>GN=SAA1<br>PE=1 SV=2 - [SAA_HUMAN]                               | -0.16 | -0.17 | -0.45 | -0.38 | -0.42 | -0.52 | -0.36 | -0.47 | -0.4 | 0.00 |
| Q9BWH6 | RNA polymerase II-associated protein 1<br>OS=Homo sapiens<br>GN=RPAP1<br>PE=1 SV=3 - [RPAP1_HUMAN]             | -0.72 |       | -0.70 |       | -0.33 | -0.06 | -0.21 | -0.20 | -0.4 | 0.02 |
| Q9NZM1 | Myoferlin<br>OS=Homo sapiens<br>GN=MYOF<br>PE=1 SV=1 - [MYOF_HUMAN]                                            |       |       |       |       | -0.26 | -0.34 | -0.40 | -0.48 | -0.4 | 0.00 |

|        |                                                                                                                                         |       |       |       |       |       |       |       |       |      |      |
|--------|-----------------------------------------------------------------------------------------------------------------------------------------|-------|-------|-------|-------|-------|-------|-------|-------|------|------|
| P81133 | Single-minded homolog 1<br>OS=Homo sapiens<br>GN=SIM1<br>PE=2 SV=2 - [SIM1_HUMAN]                                                       | -0.46 | -0.47 | -0.27 | -0.28 |       |       |       |       | -0.4 | 0.01 |
| A6NG73 | Putative RNA polymerase II subunit A C-terminal domain phosphatase SSU72-like protein 3<br>OS=Homo sapiens<br>PE=3 SV=2 - [S72L3_HUMAN] | -0.58 | -0.50 | -0.47 | -0.38 | -0.02 | -0.37 | -0.16 | -0.51 | -0.4 | 0.00 |
| Q69YH5 | Cell division cycle-associated protein 2<br>OS=Homo sapiens<br>GN=CDCA2<br>PE=1 SV=2 - [CDCA2_HUMAN]                                    | -0.26 | -0.36 | -0.40 | -0.48 |       |       |       |       | -0.4 | 0.00 |
| Q9BUN1 | Uncharacterized protein C1orf56<br>OS=Homo sapiens<br>GN=C1orf56<br>PE=1 SV=1 - [CA056_HUMAN]                                           | -0.09 | -0.19 | -0.18 | -0.30 | -0.71 | -0.77 | -0.40 | -0.36 | -0.4 | 0.00 |
| Q96GX5 | Serine/threonine-protein kinase greatwall<br>OS=Homo sapiens<br>GN=MASTL<br>PE=1 SV=1 - [GWL_HUMAN]                                     | -0.35 | -0.25 | -0.32 | -0.20 | -0.26 | 0.08  | -1.03 | -0.69 | -0.4 | 0.02 |
| Q9Y490 | Talin-1<br>OS=Homo sapiens<br>GN=TLN1<br>PE=1 SV=3 - [TLN1_HUMAN]                                                                       | -0.70 | -0.82 | -0.76 | -0.83 | 0.07  | 0.03  | -0.01 | -0.01 | -0.4 | 0.04 |
| Q9P2M7 | Cingulin<br>OS=Homo sapiens<br>GN=CGN<br>PE=1 SV=2 - [CING_HUMAN]                                                                       | -0.43 | -0.90 | -0.45 | -0.91 | -0.13 | 0.00  | -0.05 | -0.16 | -0.4 | 0.02 |

|        |                                                                                                                                     |       |       |       |       |       |       |       |       |      |      |
|--------|-------------------------------------------------------------------------------------------------------------------------------------|-------|-------|-------|-------|-------|-------|-------|-------|------|------|
| Q15057 | Arf-GAP with coiled-coil, ANK repeat and PH domain-containing protein 2<br>OS=Homo sapiens<br>GN=ACAP2<br>PE=1 SV=3 - [ACAP2_HUMAN] | -0.38 | -0.44 | -0.59 | -0.54 | -0.38 | -0.17 | -0.38 | -0.17 | -0.4 | 0.00 |
| A7KAX9 | Rho GTPase-activating protein 32<br>OS=Homo sapiens<br>GN=ARHGA<br>P32 PE=1 SV=1 - [RHG32_HUMAN]                                    | -0.55 | -0.24 | -0.58 | -0.35 | -0.13 | -0.35 | -0.32 | -0.51 | -0.4 | 0.00 |
| P02671 | Fibrinogen alpha chain<br>OS=Homo sapiens<br>GN=FGA<br>PE=1 SV=2 - [FIBA_HUMAN]                                                     | -0.57 | -0.60 | -0.59 | -0.62 | -0.21 | -0.21 | -0.13 | -0.12 | -0.4 | 0.00 |
| P42684 | Abelson tyrosine-protein kinase 2<br>OS=Homo sapiens<br>GN=ABL2<br>PE=1 SV=1 - [ABL2_HUMAN]                                         | -0.21 | -0.33 | -0.43 | -0.55 |       |       |       |       | -0.4 | 0.01 |
| P35443 | Thrombospondin-4<br>OS=Homo sapiens<br>GN=THBS4<br>PE=1 SV=2 - [TSP4_HUMAN]                                                         | -0.68 | -0.77 | -0.64 | -0.70 | -0.15 | -0.09 | -0.02 | -0.04 | -0.4 | 0.01 |
| P78417 | Glutathione S-transferase omega-1<br>OS=Homo sapiens<br>GN=GSTO1<br>PE=1 SV=2 - [GSTO1_HUMAN]                                       | -0.68 | -0.60 | -0.65 | -0.56 | -0.33 | -0.12 | -0.18 | 0.02  | -0.4 | 0.00 |
| Q96J17 | Spatascin<br>OS=Homo sapiens<br>GN=SPG11<br>PE=1 SV=3 - [SPTCS_HUMAN]                                                               | 0.23  | -0.30 | -0.39 | -0.13 | -0.37 | -0.33 | -0.92 | -0.89 | -0.4 | 0.02 |

|        |                                                                                                    |       |       |       |       |       |       |       |       |      |      |
|--------|----------------------------------------------------------------------------------------------------|-------|-------|-------|-------|-------|-------|-------|-------|------|------|
| Q9HBI1 | Beta-parvin<br>OS=Homo sapiens<br>GN=PARVB<br>PE=1 SV=1 - [PARVB_HUMAN]                            | -0.60 | -0.27 | -0.42 | -0.27 |       |       |       |       | -0.4 | 0.02 |
| Q8WXI4 | Acyl-coenzyme A thioesterase 11<br>OS=Homo sapiens<br>GN=ACOT11<br>PE=1 SV=1 - [ACO11_HUMAN]       |       |       |       |       | -0.61 | -0.26 | -0.52 | -0.18 | -0.4 | 0.03 |
| P31944 | Caspase-14<br>OS=Homo sapiens<br>GN=CASP14<br>PE=1 SV=2 - [CASPE_HUMAN]                            | -0.33 | -0.45 | -0.58 | -0.70 | -0.30 | -0.41 | -0.12 | -0.25 | -0.4 | 0.00 |
| P35442 | Thrombospondin-2<br>OS=Homo sapiens<br>GN=THBS2<br>PE=1 SV=2 - [TSP2_HUMAN]                        | -0.62 | -0.72 | -0.58 | -0.67 | -0.24 | -0.11 | -0.18 | -0.05 | -0.4 | 0.01 |
| P23759 | Paired box protein Pax-7<br>OS=Homo sapiens<br>GN=PAX7<br>PE=2 SV=3 - [PAX7_HUMAN]                 |       |       |       |       | -0.33 | -0.46 | -0.34 | -0.46 | -0.4 | 0.00 |
| Q9UIL4 | Kinesin-like protein KIF25<br>OS=Homo sapiens<br>GN=KIF25<br>PE=2 SV=2 - [KIF25_HUMAN]             | -0.50 | -0.27 | -0.04 | 0.19  | -0.49 | -0.70 | -0.58 | -0.79 | -0.4 | 0.01 |
| Q9UHF7 | Zinc finger transcription factor Trps1<br>OS=Homo sapiens<br>GN=TRPS1<br>PE=1 SV=2 - [TRPS1_HUMAN] | -0.31 | -0.24 | -0.47 | -0.38 | -0.27 |       | -0.75 |       | -0.4 | 0.00 |

|        |                                                                                                         |       |       |       |       |       |       |       |       |      |      |
|--------|---------------------------------------------------------------------------------------------------------|-------|-------|-------|-------|-------|-------|-------|-------|------|------|
| Q9H579 | Uncharacterized protein C20orf132<br>OS=Homo sapiens<br>GN=C20orf132 PE=2<br>SV=2 - [CT132_HUMAN]       | -0.24 | -0.42 | -0.44 | -0.60 | -0.98 | -0.03 | -0.60 | 0.11  | -0.4 | 0.01 |
| Q8WUA4 | General transcription factor 3C polypeptide 2<br>OS=Homo sapiens<br>GN=GTF3C2 PE=1 SV=2 - [TF3C2_HUMAN] | -0.52 | -0.46 | -0.25 | -0.18 | -0.44 | -0.35 | -0.55 | -0.46 | -0.4 | 0.00 |
| Q01813 | 6-phosphofruktokinase type C<br>OS=Homo sapiens<br>GN=PFKP PE=1 SV=2 - [K6PP_HUMAN]                     | -0.50 | -0.32 | -0.42 | -0.38 |       |       |       |       | -0.4 | 0.00 |
| O94779 | Contactin-5<br>OS=Homo sapiens<br>GN=CNTN5 PE=2 SV=2 - [CNTN5_HUMAN]                                    | -0.48 | -0.24 | -0.56 | -0.35 |       |       |       |       | -0.4 | 0.01 |
| Q15063 | Periostin<br>OS=Homo sapiens<br>GN=POSTN PE=1 SV=2 - [POSTN_HUMAN]                                      | -0.21 | -0.27 | -0.24 | -0.26 | -0.72 | -0.48 | -0.65 | -0.45 | -0.4 | 0.00 |
| O00154 | Cytosolic acyl coenzyme A thioester hydrolase<br>OS=Homo sapiens<br>GN=ACOT7 PE=1 SV=3 - [BACH_HUMAN]   | -0.53 | -0.54 | -0.43 | -0.44 | -0.25 | -0.13 | -0.53 | -0.41 | -0.4 | 0.00 |
| P04075 | Fructose-bisphosphate aldolase A<br>OS=Homo sapiens<br>GN=ALDOA PE=1 SV=2 - [ALDOA_HUMAN]               | -0.42 | -0.42 | -0.36 | -0.35 | -0.37 | -0.36 | -0.51 | -0.49 | -0.4 | 0.00 |

|        |                                                                                                            |       |       |       |       |       |       |       |       |      |      |
|--------|------------------------------------------------------------------------------------------------------------|-------|-------|-------|-------|-------|-------|-------|-------|------|------|
| Q6ZVZ8 | Ankyrin repeat and SOCS box protein 18<br>OS=Homo sapiens<br>GN=ASB18<br>PE=2 SV=2 - [ASB18_HUMAN]         | -0.49 | -0.57 | -0.26 | -0.33 |       |       |       |       | -0.4 | 0.01 |
| Q9Y6R7 | IgGfC-binding protein<br>OS=Homo sapiens<br>GN=FCGBP<br>PE=1 SV=3 - [FCGBP_HUMAN]                          | -0.22 | -0.24 | -0.27 | -0.33 | -0.70 | -0.50 | -0.62 | -0.43 | -0.4 | 0.00 |
| Q6AZY7 | Scavenger receptor class A member 3<br>OS=Homo sapiens<br>GN=SCARA3<br>PE=2 SV=1 - [SCAR3_HUMAN]           | -0.40 | -0.60 | -0.31 | -0.50 |       |       | -0.27 |       | -0.4 | 0.00 |
| P09211 | Glutathione S-transferase P<br>OS=Homo sapiens<br>GN=GSTP1<br>PE=1 SV=2 - [GSTP1_HUMAN]                    | -0.83 | -0.56 | -1.09 | -0.81 | 0.03  | 0.12  | -0.12 | -0.10 | -0.4 | 0.04 |
| Q8IY18 | Structural maintenance of chromosome 5 protein 5<br>OS=Homo sapiens<br>GN=SMC5<br>PE=1 SV=2 - [SMC5_HUMAN] | -0.14 | -0.40 | -0.45 | -0.70 |       |       |       |       | -0.4 | 0.03 |
| Q3V6T2 | Girdin<br>OS=Homo sapiens<br>GN=CCDC88A<br>PE=1 SV=2 - [GRDN_HUMAN]                                        | -0.76 | -0.45 | -0.34 | -0.15 |       |       |       |       | -0.4 | 0.04 |
| Q9UQP3 | Tenascin-N<br>OS=Homo sapiens<br>GN=TNN<br>PE=1 SV=2 - [TENN_HUMAN]                                        | -0.07 | -0.20 | -0.06 | -0.15 | -0.87 | -0.60 | -0.89 | -0.61 | -0.4 | 0.01 |





|        |                                                                                                                                                  |       |       |       |       |       |       |       |       |      |      |
|--------|--------------------------------------------------------------------------------------------------------------------------------------------------|-------|-------|-------|-------|-------|-------|-------|-------|------|------|
| P30153 | Serine/threonine-protein phosphatase 2A 65 kDa regulatory subunit A alpha isoform<br>OS=Homo sapiens<br>GN=PPP2R1A<br>PE=1 SV=4<br>-[2AAA_HUMAN] | -0.49 | -0.28 | -0.60 | -0.40 |       |       |       |       | -0.4 | 0.01 |
| P51884 | Lumican<br>OS=Homo sapiens<br>GN=LUM<br>PE=1 SV=2<br>-[LUM_HUMAN]                                                                                | -0.23 | -0.27 | -0.22 | -0.27 | -0.61 | -0.71 | -0.54 | -0.67 | -0.4 | 0.00 |
| Q9HCM3 | UPF0606 protein<br>KIAA1549<br>OS=Homo sapiens<br>GN=KIAA1549<br>PE=1 SV=4<br>-[K1549_HUMAN]                                                     | -0.36 | -0.80 | -0.47 | -0.62 | -0.40 | -0.21 | -0.43 | -0.25 | -0.4 | 0.00 |
| Q9NXZ2 | Probable ATP-dependent RNA helicase DDX43<br>OS=Homo sapiens<br>GN=DDX43<br>PE=1 SV=2<br>-[DDX43_HUMAN]                                          |       |       |       |       | -0.45 | -0.36 | -0.53 | -0.44 | -0.4 | 0.00 |
| Q9UI72 | Putative uncharacterized protein<br>PRO0255<br>OS=Homo sapiens<br>GN=PRO0255<br>PE=5 SV=1<br>-[YE014_HUMAN]                                      | -0.55 | -0.44 | -0.45 | -0.33 |       |       |       |       | -0.4 | 0.00 |
| P27105 | Erythrocyte band 7 integral membrane protein<br>OS=Homo sapiens<br>GN=STOM<br>PE=1 SV=3<br>-[STOM_HUMAN]                                         | -0.41 | -0.29 | -0.61 | -0.47 |       |       |       |       | -0.4 | 0.01 |

|        |                                                                                             |       |       |       |       |       |       |       |       |      |      |
|--------|---------------------------------------------------------------------------------------------|-------|-------|-------|-------|-------|-------|-------|-------|------|------|
| Q96NL6 | Sodium channel and clathrin linker 1 OS=Homo sapiens GN=SCLT1 PE=1 SV=2 - [SCLT1_HUMAN]     | -0.40 | -0.41 | -0.49 | -0.49 |       |       |       |       | -0.4 | 0.00 |
| P11413 | Glucose-6-phosphate 1-dehydrogenase OS=Homo sapiens GN=G6PD PE=1 SV=4 - [G6PD_HUMAN]        | -0.48 | -0.29 | -0.68 | -0.49 | -0.61 | -0.55 | -0.28 | -0.22 | -0.4 | 0.00 |
| O00571 | ATP-dependent RNA helicase DDX3X OS=Homo sapiens GN=DDX3X PE=1 SV=3 - [DDX3X_HUMAN]         | -0.46 | -0.48 | -0.42 | -0.43 |       |       |       |       | -0.5 | 0.00 |
| Q8NCE2 | Myotubularin-related protein 14 OS=Homo sapiens GN=MTMR14 PE=1 SV=2 - [MTMR14_HUMAN]        | -0.30 | -0.46 | -0.45 | -0.60 |       |       |       |       | -0.5 | 0.01 |
| P06733 | Alpha-enolase OS=Homo sapiens GN=ENO1 PE=1 SV=2 - [ENO1_HUMAN]                              | -0.49 | -0.70 | -0.32 | -0.58 | -0.34 | -0.28 | -0.49 | -0.43 | -0.5 | 0.00 |
| Q9Y2K6 | Ubiquitin carboxyl-terminal hydrolase 20 OS=Homo sapiens GN=USP20 PE=1 SV=2 - [UBP20_HUMAN] | -0.21 | -0.58 | -0.42 | -0.61 |       |       |       |       | -0.5 | 0.02 |

|        |                                                                                                                       |       |       |       |       |       |       |       |       |      |      |
|--------|-----------------------------------------------------------------------------------------------------------------------|-------|-------|-------|-------|-------|-------|-------|-------|------|------|
| P50851 | Lipopolysaccharide-responsive and beige-like anchor protein<br>OS=Homo sapiens<br>GN=LRBA<br>PE=1 SV=4 - [LRBA_HUMAN] | -0.39 | -0.41 | -0.31 | -0.33 | -0.34 | -0.62 | -0.48 | -0.77 | -0.5 | 0.00 |
| O43422 | 52 kDa repressor of the inhibitor of the protein kinase<br>OS=Homo sapiens<br>GN=PRKRIR<br>PE=2 SV=2 - [P52K_HUMAN]   | -0.50 | -0.73 | -0.17 | -0.45 |       |       |       |       | -0.5 | 0.03 |
| Q96C34 | RUN domain-containing protein 1<br>OS=Homo sapiens<br>GN=RUNDC1<br>PE=1 SV=3 - [RUNDC1_HUMAN]                         | -0.37 | -0.85 | -0.60 | -1.06 | -0.02 | -0.40 | 0.00  | -0.39 | -0.5 | 0.01 |
| Q7Z442 | Polycystic kidney disease protein 1-like 2<br>OS=Homo sapiens<br>GN=PKD1L2<br>PE=1 SV=4 - [PKD1L2_HUMAN]              | -0.54 | -0.57 | -0.36 | -0.38 |       |       |       |       | -0.5 | 0.00 |
| Q9UBB9 | Tuftelin-interacting protein 11<br>OS=Homo sapiens<br>GN=TFIP11<br>PE=1 SV=1 - [TFIP11_HUMAN]                         | -0.37 | -0.43 | -0.50 | -0.56 |       |       |       |       | -0.5 | 0.00 |
| P00915 | Carbonic anhydrase 1<br>OS=Homo sapiens<br>GN=CA1<br>PE=1 SV=2 - [CAH1_HUMAN]                                         | -0.36 | -0.31 | -0.36 | -0.32 | -0.58 | -0.52 | -0.68 | -0.59 | -0.5 | 0.00 |

|        |                                                                                                              |       |       |       |       |       |       |       |       |      |      |
|--------|--------------------------------------------------------------------------------------------------------------|-------|-------|-------|-------|-------|-------|-------|-------|------|------|
| Q6E0U4 | Dermokine<br>OS=Homo sapiens<br>GN=DMKN<br>PE=1 SV=3 - [DMKN_HUMAN]                                          | -0.67 | -0.31 | -0.65 | -0.24 |       |       |       |       | -0.5 | 0.02 |
| Q9NXZ1 | Sarcoma antigen 1<br>OS=Homo sapiens<br>GN=SAGE1<br>PE=2 SV=2 - [SAGE1_HUMAN]                                |       |       |       |       | -0.42 | -0.41 | -0.53 | -0.52 | -0.5 | 0.00 |
| Q15051 | IQ calmodulin-binding motif-containing protein 1<br>OS=Homo sapiens<br>GN=IQCB1<br>PE=1 SV=1 - [IQCB1_HUMAN] |       |       |       |       | -0.61 | -0.24 | -0.67 | -0.38 | -0.5 | 0.02 |
| O75096 | Low-density lipoprotein receptor-related protein 4<br>OS=Homo sapiens<br>GN=LRP4<br>PE=1 SV=4 - [LRP4_HUMAN] | -0.05 | -0.89 | -0.02 | -0.85 | -0.99 | -0.64 | -0.37 | -0.03 | -0.5 | 0.01 |
| O60296 | Trafficking kinesin-binding protein 2<br>OS=Homo sapiens<br>GN=TRAK2<br>PE=1 SV=2 - [TRAK2_HUMAN]            | -0.32 | -0.10 | -0.23 | 0.01  | -0.82 | -0.67 | -0.92 | -0.78 | -0.5 | 0.01 |
| P18206 | Vinculin<br>OS=Homo sapiens<br>GN=VCL<br>PE=1 SV=4 - [VINC_HUMAN]                                            | -0.75 | -0.76 | -0.79 | -0.80 | -0.17 | -0.10 | -0.28 | -0.22 | -0.5 | 0.00 |
| O60437 | Periplakin<br>OS=Homo sapiens<br>GN=PPL<br>PE=1 SV=4 - [PEPL_HUMAN]                                          | -0.61 | -0.52 | -0.57 | -0.47 | -0.55 | -0.41 | -0.44 | -0.31 | -0.5 | 0.00 |
| Q86VV8 | Rotatin<br>OS=Homo sapiens<br>GN=RTTN<br>PE=1 SV=3 - [RTTN_HUMAN]                                            | -0.50 | -0.57 | -0.40 | -0.47 |       |       |       |       | -0.5 | 0.00 |

|        |                                                                                                 |       |       |       |       |       |       |       |       |      |      |
|--------|-------------------------------------------------------------------------------------------------|-------|-------|-------|-------|-------|-------|-------|-------|------|------|
| Q3KQU3 | MAP7 domain-containing protein 1<br>OS=Homo sapiens<br>GN=MAP7D1<br>PE=1 SV=1 - [MAP7D1_HUMAN]  | -0.46 | -0.39 | -0.59 | -0.52 |       |       |       | -0.5  | 0.00 |      |
| Q6YHU6 | Thyroid adenoma-associated protein<br>OS=Homo sapiens<br>GN=THADA<br>PE=1 SV=1 - [THADA_HUMAN]  | -0.70 | -0.34 | -0.55 | -0.17 | -0.56 | 0.05  | -1.13 | -0.52 | -0.5 | 0.01 |
| P35609 | Alpha-actinin-2<br>OS=Homo sapiens<br>GN=ACTN2<br>PE=1 SV=1 - [ACTN2_HUMAN]                     | -0.47 | -0.57 | -0.41 | -0.52 |       |       |       |       | -0.5 | 0.00 |
| O76024 | Wolframin<br>OS=Homo sapiens<br>GN=WFS1<br>PE=1 SV=2 - [WFS1_HUMAN]                             | -0.46 | -0.33 | -0.51 | -0.37 | 0.08  | -0.90 | -0.20 | -1.25 | -0.5 | 0.01 |
| Q96N46 | Tetratricopeptide repeat protein 14<br>OS=Homo sapiens<br>GN=TTC14<br>PE=1 SV=1 - [TTC14_HUMAN] | -0.43 | -0.75 | -0.25 | -0.56 |       |       |       |       | -0.5 | 0.02 |
| P05062 | Fructose-bisphosphate aldolase B<br>OS=Homo sapiens<br>GN=ALDOB<br>PE=1 SV=2 - [ALDOB_HUMAN]    | -0.47 | -0.44 | -0.48 | -0.51 | -0.46 | -0.52 | -0.53 | -0.58 | -0.5 | 0.00 |
| Q6UXT8 | Protein FAM150A<br>OS=Homo sapiens<br>GN=FAM150A<br>PE=2 SV=1 - [F150A_HUMAN]                   |       |       |       |       | -0.56 | -0.85 | -0.15 | -0.44 | -0.5 | 0.04 |

|        |                                                                                                                            |       |       |       |       |       |       |       |       |      |      |
|--------|----------------------------------------------------------------------------------------------------------------------------|-------|-------|-------|-------|-------|-------|-------|-------|------|------|
| P38606 | V-type proton ATPase catalytic subunit A<br>OS=Homo sapiens<br>GN=ATP6V1<br>A PE=1 SV=2<br>-[VATA_HUMAN]                   | -0.82 | -0.72 | -0.78 | -0.67 | 0.08  | 0.02  | -0.52 | -0.58 | -0.5 | 0.01 |
| Q9HCJ0 | Trinucleotide repeat-containing gene 6C protein<br>OS=Homo sapiens<br>GN=TNRC6C<br>PE=1 SV=3 - [TNRC6_HUMAN]               | -0.26 | -0.80 | -0.25 | -0.78 | -0.62 | -0.51 | -0.44 | -0.34 | -0.5 | 0.00 |
| Q8N5R6 | Coiled-coil domain-containing protein 33<br>OS=Homo sapiens<br>GN=CCDC33<br>PE=1 SV=3 - [CCDC33_HUMAN]                     | -0.19 | -1.42 | -0.10 | -1.31 | -0.10 | -0.17 | -0.32 | -0.39 | -0.5 | 0.03 |
| P63104 | 14-3-3 protein zeta/delta<br>OS=Homo sapiens<br>GN=YWHAZ<br>PE=1 SV=1 - [1433Z_HUMAN]                                      | -0.82 | -0.80 | -0.69 | -0.66 | -0.26 | -0.33 | -0.21 | -0.28 | -0.5 | 0.00 |
| O94898 | Leucine-rich repeats and immunoglobulin-like domains protein 2<br>OS=Homo sapiens<br>GN=LRIG2<br>PE=1 SV=3 - [LRIG2_HUMAN] | -0.51 | -0.44 | -0.58 | -0.50 |       |       |       |       | -0.5 | 0.00 |
| Q13228 | Selenium-binding protein 1<br>OS=Homo sapiens<br>GN=SELENB<br>P1 PE=1 SV=2 - [SBP1_HUMAN]                                  | -0.16 | -0.39 | -0.12 | -0.34 | -1.03 | -0.74 | -0.79 | -0.50 | -0.5 | 0.00 |

|        |                                                                                                        |       |       |       |       |       |       |       |       |      |      |
|--------|--------------------------------------------------------------------------------------------------------|-------|-------|-------|-------|-------|-------|-------|-------|------|------|
| P08294 | Extracellular superoxide dismutase [Cu-Zn]<br>OS=Homo sapiens<br>GN=SOD3<br>PE=1 SV=2 - [SODE_HUMAN]   | -0.68 | -0.61 | -0.78 | -0.70 | -0.41 | -0.31 | -0.36 | -0.24 | -0.5 | 0.00 |
| Q86V13 | Ras GTPase-activating-like protein IQGAP3<br>OS=Homo sapiens<br>GN=IQGAP3<br>PE=1 SV=2 - [IQGA3_HUMAN] | -0.45 | -0.25 | -0.41 | -0.26 | -0.68 | -0.52 | -0.84 | -0.67 | -0.5 | 0.00 |
| P35221 | Catenin alpha-1<br>OS=Homo sapiens<br>GN=CTNNA1<br>PE=1 SV=1 - [CTNA1_HUMAN]                           | -0.65 | -0.69 | -0.39 | -0.33 |       |       |       |       | -0.5 | 0.01 |
| P09467 | Fructose-1,6-bisphosphatase 1<br>OS=Homo sapiens<br>GN=FBP1<br>PE=1 SV=5 - [F16P1_HUMAN]               | -0.57 | -0.60 | -0.45 | -0.48 | -0.48 | -0.19 | -0.83 | -0.54 | -0.5 | 0.00 |
| Q9BZD4 | Kinetochores protein Nuf2<br>OS=Homo sapiens<br>GN=NUF2<br>PE=1 SV=2 - [NUF2_HUMAN]                    | -0.18 | -0.27 | -0.56 | -0.64 | -0.51 | -0.91 | -0.33 | -0.73 | -0.5 | 0.00 |
| Q96J94 | Piwi-like protein 1<br>OS=Homo sapiens<br>GN=PIWIL1<br>PE=1 SV=1 - [PIWL1_HUMAN]                       |       |       |       |       | -0.44 | -0.39 | -0.63 | -0.60 | -0.5 | 0.00 |
| O75467 | Zinc finger protein 324A<br>OS=Homo sapiens<br>GN=ZNF324<br>PE=1 SV=1 - [Z324A_HUMAN]                  | -0.60 | -0.36 | -0.61 | -0.35 | -0.14 | -0.48 | -0.63 | -0.98 | -0.5 | 0.00 |

|        |                                                                                                                                       |       |       |       |       |       |       |       |       |      |      |
|--------|---------------------------------------------------------------------------------------------------------------------------------------|-------|-------|-------|-------|-------|-------|-------|-------|------|------|
| Q92542 | Nicestrin<br>OS=Homo sapiens<br>GN=NCSTN<br>PE=1 SV=2 -<br>[NICA_HUMAN]                                                               | -0.60 | -0.52 | -0.47 | -0.37 | -0.70 | -0.89 | -0.22 | -0.41 | -0.5 | 0.00 |
| A7E2V4 | Zinc finger<br>SWIM<br>domain-<br>containing<br>protein<br>KIAA0913<br>OS=Homo sapiens<br>GN=KIAA0913<br>PE=1 SV=1 -<br>[K0913_HUMAN] |       |       |       |       | -0.53 | -0.57 | -0.63 | -0.37 | -0.5 | 0.00 |
| P35348 | Alpha-1A<br>adrenergic<br>receptor<br>OS=Homo sapiens<br>GN=ADRA1A<br>PE=2 SV=2 -<br>[ADA1A_HUMAN]                                    |       |       |       |       | -0.66 | -0.73 | -0.33 | -0.40 | -0.5 | 0.01 |
| Q9Y263 | Phospholipase A-2-<br>activating<br>protein<br>OS=Homo sapiens<br>GN=PLAA<br>PE=1 SV=2 -<br>[PLAP_HUMAN]                              |       |       |       |       | -0.48 | -0.67 | -0.41 | -0.60 | -0.5 | 0.00 |
| P35813 | Protein<br>phosphatase<br>1A OS=Homo sapiens<br>GN=PPM1A<br>PE=1 SV=1 -<br>[PPM1A_HUMAN]                                              | -0.54 | -0.52 | -0.56 | -0.53 | -0.55 |       |       |       | -0.5 | 0.00 |
| Q86VS8 | Protein Hook<br>homolog 3<br>OS=Homo sapiens<br>GN=HOOK3<br>PE=1 SV=2 -<br>[HOOK3_HUMAN]                                              | -0.31 | -0.68 | -0.40 | -0.77 |       |       |       |       | -0.5 | 0.02 |
| Q6PGQ7 | Protein<br>aurora<br>borealis<br>OS=Homo sapiens<br>GN=BORA<br>PE=1 SV=2 -<br>[BORA_HUMAN]                                            |       |       |       |       | -0.54 | -0.55 | -0.53 | -0.55 | -0.5 | 0.00 |



|        |                                                                                                                       |       |       |       |       |       |       |       |       |      |      |
|--------|-----------------------------------------------------------------------------------------------------------------------|-------|-------|-------|-------|-------|-------|-------|-------|------|------|
| P24043 | Laminin subunit alpha-2<br>OS=Homo sapiens<br>GN=LAMA2<br>PE=1 SV=4 - [LAMA2_HUMAN]                                   | -0.20 | -0.23 | -0.42 | -0.47 | -1.01 | -0.69 | -0.81 | -0.49 | -0.5 | 0.00 |
| Q86VE3 | Spermidine/spermine N(1)-acetyltransferase-like protein 1<br>OS=Homo sapiens<br>GN=SATL1<br>PE=2 SV=3 - [SATL1_HUMAN] | -0.56 | -0.60 | -0.49 | -0.52 |       |       |       |       | -0.5 | 0.00 |
| P30101 | Protein disulfide-isomerase A3<br>OS=Homo sapiens<br>GN=PDIA3<br>PE=1 SV=4 - [PDIA3_HUMAN]                            | -0.75 | -0.78 | -0.82 | -0.84 | -0.28 | -0.28 | -0.31 | -0.31 | -0.5 | 0.00 |
| Q6P6B7 | Ankyrin repeat domain-containing protein 16<br>OS=Homo sapiens<br>GN=ANKRD16<br>PE=2 SV=1 - [ANKR16_HUMAN]            | -0.21 | -0.33 | -0.16 | -0.26 | -0.87 | -1.04 | -0.89 | -0.62 | -0.5 | 0.00 |
| P04179 | Superoxide dismutase [Mn], mitochondrial<br>OS=Homo sapiens<br>GN=SOD2<br>PE=1 SV=2 - [SODM_HUMAN]                    | -0.77 | -0.79 | -0.88 | -0.89 | -0.33 | -0.29 | -0.26 | -0.22 | -0.6 | 0.00 |
| P51956 | Serine/threonine-protein kinase Nek3<br>OS=Homo sapiens<br>GN=NEK3<br>PE=1 SV=2 - [NEK3_HUMAN]                        | -1.22 | -1.33 | -0.59 | -0.69 | -0.19 | -0.12 | -0.18 | -0.11 | -0.6 | 0.02 |

|        |                                                                                                                         |       |       |       |       |       |       |       |       |      |      |
|--------|-------------------------------------------------------------------------------------------------------------------------|-------|-------|-------|-------|-------|-------|-------|-------|------|------|
| Q92736 | Ryanodine receptor 2<br>OS=Homo sapiens<br>GN=RYR2<br>PE=1 SV=3 - [RYR2_HUMAN]                                          | -0.01 | -0.19 | -0.29 | -0.47 | -1.20 | -1.85 | 0.11  | -0.54 | -0.6 | 0.05 |
| Q4G0X9 | Coiled-coil domain-containing protein 40<br>OS=Homo sapiens<br>GN=CCDC40<br>PE=2 SV=2 - [CCD40_HUMAN]                   | -0.25 | -0.27 | -0.35 | -0.36 | -0.62 | -1.19 | -0.42 | -1.00 | -0.6 | 0.00 |
| P02042 | Hemoglobin subunit delta<br>OS=Homo sapiens<br>GN=HBD<br>PE=1 SV=2 - [HBD_HUMAN]                                        | -0.83 | -0.81 | -0.93 | -0.94 | -0.24 | -0.26 | -0.21 | -0.25 | -0.6 | 0.00 |
| Q5T601 | Probable G-protein coupled receptor 110<br>OS=Homo sapiens<br>GN=GPR110<br>PE=2 SV=2 - [GP110_HUMAN]                    | -0.46 | -0.48 | -0.49 | -0.50 |       | -0.87 |       |       | -0.6 | 0.00 |
| Q96PX9 | Pleckstrin homology domain-containing family G member 4B<br>OS=Homo sapiens<br>GN=PLEKHG4B<br>PE=2 SV=4 - [PKH4B_HUMAN] | -0.58 | -0.62 | -0.66 | -0.70 | -0.89 | -0.45 | -0.51 | -0.08 | -0.6 | 0.00 |
| Q9BTW9 | Tubulin-specific chaperone D<br>OS=Homo sapiens<br>GN=TBCD<br>PE=1 SV=2 - [TBCD_HUMAN]                                  |       |       |       |       | -0.54 | -0.44 | -0.68 | -0.58 | -0.6 | 0.00 |



|        |                                                                                                               |       |       |       |       |       |       |       |       |      |      |
|--------|---------------------------------------------------------------------------------------------------------------|-------|-------|-------|-------|-------|-------|-------|-------|------|------|
| Q6UXB2 | VEGF co-regulated chemokine 1<br>OS=Homo sapiens<br>GN=CXCL17<br>PE=1 SV=1 - [VCC1_HUMAN]                     | -0.65 | -0.47 | -0.70 | -0.51 |       |       |       |       | -0.6 | 0.00 |
| Q2PPJ7 | Ral GTPase-activating protein subunit alpha-2<br>OS=Homo sapiens<br>GN=RALGAP A2<br>PE=1 SV=2 - [RGPA2_HUMAN] | -0.68 | -0.78 | -0.67 | -0.75 | -0.30 | -0.64 | -0.16 | -0.67 | -0.6 | 0.00 |
| P49327 | Fatty acid synthase<br>OS=Homo sapiens<br>GN=FASN<br>PE=1 SV=3 - [FAS_HUMAN]                                  | 0.04  | 0.07  | -0.70 | -0.66 | -0.93 | -0.95 | -0.77 | -0.78 | -0.6 | 0.00 |
| P51826 | AF4/FMR2 family member 3<br>OS=Homo sapiens<br>GN=AFF3<br>PE=1 SV=2 - [AFF3_HUMAN]                            |       |       |       |       | -0.61 | -0.67 | -0.50 | -0.58 | -0.6 | 0.00 |
| P22314 | Ubiquitin-like modifier-activating enzyme 1<br>OS=Homo sapiens<br>GN=UBA1<br>PE=1 SV=3 - [UBA1_HUMAN]         | -0.54 | -0.62 | -0.50 | -0.71 |       |       |       |       | -0.6 | 0.00 |
| Q96GC6 | Neurotrophin receptor-interacting factor homolog<br>OS=Homo sapiens<br>GN=ZNF274<br>PE=1 SV=2 - [ZN274_HUMAN] | -0.37 | -0.68 | -0.52 | -0.82 |       |       |       |       | -0.6 | 0.01 |

|        |                                                                                                        |       |       |       |       |       |       |       |       |      |      |
|--------|--------------------------------------------------------------------------------------------------------|-------|-------|-------|-------|-------|-------|-------|-------|------|------|
| Q96JC1 | Vam6/Vps39-like protein<br>OS=Homo sapiens<br>GN=VPS39<br>PE=1 SV=2 - [VPS39_HUMAN]                    |       |       |       |       | -0.61 | -0.49 | -0.62 | -0.67 | -0.6 | 0.00 |
| Q9UP83 | Conserved oligomeric Golgi complex subunit 5<br>OS=Homo sapiens<br>GN=COG5<br>PE=1 SV=3 - [COG5_HUMAN] | -0.53 | -1.02 | -0.36 | -0.49 |       |       |       |       | -0.6 | 0.03 |
| P32119 | Peroxiredoxin-2<br>OS=Homo sapiens<br>GN=PRDX2<br>PE=1 SV=5 - [PRDX2_HUMAN]                            | -0.60 | -0.70 | -0.70 | -0.76 | -0.49 | -0.43 | -0.66 | -0.61 | -0.6 | 0.00 |
| P55072 | Transitional endoplasmic reticulum ATPase<br>OS=Homo sapiens<br>GN=VCP<br>PE=1 SV=4 - [TERA_HUMAN]     | -0.54 | -0.53 | -0.58 | -0.62 | -0.93 | -1.05 | -0.31 | -0.42 | -0.6 | 0.00 |
| P68366 | Tubulin alpha-4A chain<br>OS=Homo sapiens<br>GN=TUBA4A<br>PE=1 SV=1 - [TBA4A_HUMAN]                    | -0.76 | -1.06 | -1.31 | -1.26 | -0.22 | -0.08 | -0.23 | -0.09 | -0.6 | 0.01 |
| Q5D862 | Filaggrin-2<br>OS=Homo sapiens<br>GN=FLG2<br>PE=1 SV=1 - [FILA2_HUMAN]                                 | -0.48 | -0.31 | -0.99 | -0.76 |       |       |       |       | -0.6 | 0.02 |
| B2RTY4 | Unconventional myosin-IXa<br>OS=Homo sapiens<br>GN=MYO9A<br>PE=1 SV=2 - [MYO9A_HUMAN]                  | -1.29 | -1.28 |       |       | -0.32 | -0.28 | -0.33 | -0.30 | -0.6 | 0.03 |

|        |                                                                                                                                 |       |       |       |       |       |       |       |       |      |      |
|--------|---------------------------------------------------------------------------------------------------------------------------------|-------|-------|-------|-------|-------|-------|-------|-------|------|------|
| Q9C0C2 | 182 kDa<br>tankyrase-1-<br>binding<br>protein<br>OS=Homo<br>sapiens<br>GN=TNKS1B<br>P1 PE=1<br>SV=4 -<br>[TB182_HUM<br>AN]      | -0.13 | -0.72 | -0.24 | -0.74 | -0.85 | -0.82 | -0.80 | -0.78 | -0.6 | 0.00 |
| Q8TDZ2 | Protein-<br>methionine<br>sulfoxide<br>oxidase<br>MICAL1<br>OS=Homo<br>sapiens<br>GN=MICAL1<br>PE=1 SV=2 -<br>[MICA1_HUM<br>AN] | -0.84 | -0.84 | -1.14 | -1.14 | -0.22 | -0.46 | -0.12 | -0.36 | -0.6 | 0.00 |
| P69905 | Hemoglobin<br>subunit alpha<br>OS=Homo<br>sapiens<br>GN=HBA1<br>PE=1 SV=2 -<br>[HBA_HUMA<br>N]                                  | -0.65 | -0.79 | -0.78 | -0.82 | -0.50 | -0.51 | -0.55 | -0.54 | -0.6 | 0.00 |
| O94964 | Uncharacteri-<br>zed protein<br>KIAA0889<br>OS=Homo<br>sapiens<br>GN=KIAA088<br>9 PE=1 SV=2<br>-<br>[K0889_HUM<br>AN]           |       |       | -0.15 | -1.61 | -0.67 | -0.60 | -0.45 | -0.38 | -0.6 | 0.03 |
| O15143 | Actin-related<br>protein 2/3<br>complex<br>subunit 1B<br>OS=Homo<br>sapiens<br>GN=ARPC1B<br>PE=1 SV=3 -<br>[ARC1B_HU<br>MAN]    | -0.50 | -0.78 | -0.52 | -0.78 |       |       |       |       | -0.6 | 0.00 |
| Q5TCY1 | Tau-tubulin<br>kinase 1<br>OS=Homo<br>sapiens<br>GN=TTBK1<br>PE=1 SV=2 -<br>[TTBK1_HU<br>MAN]                                   | -0.72 | -0.81 | -0.48 | -0.57 |       |       |       |       | -0.6 | 0.00 |

|        |                                                                                                                       |       |       |       |       |       |       |       |       |      |      |
|--------|-----------------------------------------------------------------------------------------------------------------------|-------|-------|-------|-------|-------|-------|-------|-------|------|------|
| Q99704 | Docking protein 1<br>OS=Homo sapiens<br>GN=DOK1<br>PE=1 SV=1 - [DOK1_HUMAN]                                           | -0.31 | -0.22 | -0.51 | -0.41 | -0.49 | -1.19 | -0.67 | -1.38 | -0.6 | 0.00 |
| Q9UIV8 | Serpin B13<br>OS=Homo sapiens<br>GN=SERPIN B13<br>PE=2 SV=2 - [SPB13_HUMAN]                                           | -0.75 | -0.71 | -0.89 | -0.85 | -0.68 | -0.21 | -0.79 | -0.33 | -0.6 | 0.00 |
| Q16853 | Membrane primary amine oxidase<br>OS=Homo sapiens<br>GN=AOC3<br>PE=1 SV=3 - [AOC3_HUMAN]                              | -0.77 | -0.69 | -0.58 | -0.56 |       |       |       |       | -0.7 | 0.00 |
| Q99814 | Endothelial PAS domain-containing protein 1<br>OS=Homo sapiens<br>GN=EPAS1<br>PE=1 SV=3 - [EPAS1_HUMAN]               | -0.89 | -0.65 | -0.72 | -0.41 |       |       |       |       | -0.7 | 0.01 |
| Q9UPS8 | Ankyrin repeat domain-containing protein 26<br>OS=Homo sapiens<br>GN=ANKRD26<br>PE=1 SV=3 - [ANKR26_HUMAN]            | -0.72 | -1.60 | -0.03 | -0.90 | -0.58 | -0.90 | -0.17 | -0.50 | -0.7 | 0.01 |
| Q96DC7 | Transmembrane and coiled-coil domain-containing protein 6<br>OS=Homo sapiens<br>GN=TMCO6<br>PE=2 SV=2 - [TMCO6_HUMAN] | -1.14 | -0.83 | -1.32 | -0.99 | -0.23 | -0.25 | -0.31 | -0.32 | -0.7 | 0.00 |

|        |                                                                                                   |       |       |       |       |       |       |       |       |      |      |
|--------|---------------------------------------------------------------------------------------------------|-------|-------|-------|-------|-------|-------|-------|-------|------|------|
| P13716 | Delta-aminolevulinic acid dehydratase<br>OS=Homo sapiens<br>GN=ALAD<br>PE=1 SV=1 - [HEM2_HUMAN]   | -0.77 | -0.55 | -0.81 | -0.58 |       |       |       |       | -0.7 | 0.00 |
| P30043 | Flavin reductase (NADPH)<br>OS=Homo sapiens<br>GN=BLVRB<br>PE=1 SV=3 - [BLVRB_HUMAN]              | -0.71 | -0.75 | -0.64 | -0.64 | -0.73 | -0.67 | -0.69 | -0.61 | -0.7 | 0.00 |
| Q13077 | TNF receptor-associated factor 1<br>OS=Homo sapiens<br>GN=TRAF1<br>PE=1 SV=1 - [TRAF1_HUMAN]      |       |       |       |       | -0.47 | -0.37 | -0.99 | -0.89 | -0.7 | 0.02 |
| Q9H4B7 | Tubulin beta-1 chain<br>OS=Homo sapiens<br>GN=TUBB1<br>PE=1 SV=1 - [TBB1_HUMAN]                   | -1.38 | -1.38 | -1.30 | -1.29 | -0.21 | -0.02 | 0.06  | 0.02  | -0.7 | 0.03 |
| Q15942 | Zyxin<br>OS=Homo sapiens<br>GN=ZYX<br>PE=1 SV=1 - [ZYX_HUMAN]                                     | -1.34 | -1.59 | -1.05 | -1.36 | 0.08  | 0.04  | -0.14 | -0.17 | -0.7 | 0.03 |
| Q9UL58 | Zinc finger protein 215<br>OS=Homo sapiens<br>GN=ZNF215<br>PE=2 SV=2 - [ZN215_HUMAN]              | -0.41 | -0.82 | -0.45 | -0.78 | -1.64 | -0.83 | -0.71 | 0.10  | -0.7 | 0.01 |
| Q9UMN6 | Histone-lysine N-methyltransferase MLL4<br>OS=Homo sapiens<br>GN=WBP7<br>PE=1 SV=1 - [MLL4_HUMAN] | -1.43 | -1.08 | -1.27 | -0.90 | -0.46 | -0.15 | -0.28 | 0.02  | -0.7 | 0.01 |



|        |                                                                                                       |       |       |       |       |       |       |       |       |      |      |
|--------|-------------------------------------------------------------------------------------------------------|-------|-------|-------|-------|-------|-------|-------|-------|------|------|
| Q8N8E3 | Centrosomal protein of 112 kDa<br>OS=Homo sapiens<br>GN=CEP112<br>PE=1 SV=2 - [CE112_HUMAN]           | -1.24 | -2.01 | -0.37 | -1.14 | -0.05 | -0.51 | 0.11  | -0.35 | -0.7 | 0.03 |
| Q96RR1 | Twinkle protein, mitochondrial<br>OS=Homo sapiens<br>GN=PEO1<br>PE=1 SV=1 - [PEO1_HUMAN]              |       |       |       |       | -0.96 | -1.11 | -0.28 | -0.43 | -0.7 | 0.04 |
| Q9HC98 | Serine/threonine-protein kinase Nek6<br>OS=Homo sapiens<br>GN=NEK6<br>PE=1 SV=2 - [NEK6_HUMAN]        | -0.51 | -1.12 | -0.25 | -0.91 |       |       |       |       | -0.7 | 0.04 |
| Q06418 | Tyrosine-protein kinase receptor<br>TYRO3<br>OS=Homo sapiens<br>GN=TYRO3<br>PE=1 SV=1 - [TYRO3_HUMAN] | -0.61 | -0.77 | -0.50 | -0.65 | -0.92 | -0.64 | -0.94 | -0.67 | -0.7 | 0.00 |
| P68871 | Hemoglobin subunit beta<br>OS=Homo sapiens<br>GN=HBB<br>PE=1 SV=2 - [HBB_HUMAN]                       | -0.80 | -0.88 | -0.96 | -1.05 | -0.50 | -0.46 | -0.54 | -0.54 | -0.7 | 0.00 |
| Q13563 | Polycystin-2<br>OS=Homo sapiens<br>GN=PKD2<br>PE=1 SV=3 - [PKD2_HUMAN]                                | -0.81 | -0.46 | -0.40 | -0.05 | -0.74 | -1.28 | -0.61 | -1.39 | -0.7 | 0.00 |
| Q5T9L3 | Protein wntless homolog<br>OS=Homo sapiens<br>GN=WLS<br>PE=1 SV=2 - [WLS_HUMAN]                       | -0.77 | -1.39 | -1.04 | -1.65 | -0.14 | -0.21 | -0.29 | -0.36 | -0.7 | 0.01 |

|        |                                                                                                                              |       |       |       |       |       |       |       |       |      |      |
|--------|------------------------------------------------------------------------------------------------------------------------------|-------|-------|-------|-------|-------|-------|-------|-------|------|------|
| Q9UI08 | Ena/VASP-like protein<br>OS=Homo sapiens<br>GN=EVL<br>PE=1 SV=2 - [EVL_HUMAN]                                                |       |       |       |       | -0.54 | -1.06 | -0.27 | -1.07 | -0.7 | 0.03 |
| Q96T58 | Msx2-interacting protein<br>OS=Homo sapiens<br>GN=SPEN<br>PE=1 SV=1 - [MINT_HUMAN]                                           | -0.48 | -0.73 | -0.52 | -0.75 | -0.72 | -1.24 | -0.48 | -1.00 | -0.7 | 0.00 |
| Q3ZCM7 | Tubulin beta-8 chain<br>OS=Homo sapiens<br>GN=TUBB8<br>PE=1 SV=2 - [TBB8_HUMAN]                                              | -0.70 | -0.62 | -0.89 | -0.78 |       |       |       |       | -0.7 | 0.00 |
| Q01970 | 1-phosphatidylinositol 4,5-bisphosphate phosphodiesterase beta-3<br>OS=Homo sapiens<br>GN=PLCB3<br>PE=1 SV=2 - [PLCB3_HUMAN] | -1.43 | -1.54 | -1.20 | -1.31 | -0.16 | -0.08 | -0.20 | -0.12 | -0.8 | 0.01 |
| Q15404 | Ras suppressor protein 1<br>OS=Homo sapiens<br>GN=RSU1<br>PE=1 SV=3 - [RSU1_HUMAN]                                           | -0.74 | -0.89 | -0.68 | -0.73 |       |       |       |       | -0.8 | 0.00 |
| P52907 | F-actin-capping protein subunit alpha-1<br>OS=Homo sapiens<br>GN=CAPZA1<br>PE=1 SV=3 - [CAZA1_HUMAN]                         | -0.64 | -0.82 | -0.72 | -0.88 |       |       |       |       | -0.8 | 0.00 |

|        |                                                                                                                               |       |       |       |       |       |       |       |       |      |      |
|--------|-------------------------------------------------------------------------------------------------------------------------------|-------|-------|-------|-------|-------|-------|-------|-------|------|------|
| Q15652 | Probable JmjC domain-containing histone demethylation protein 2C<br>OS=Homo sapiens<br>GN=JMJD1C<br>PE=1 SV=2 - [JHD2C_HUMAN] | -0.87 | -0.89 | -0.68 | -0.63 |       |       |       |       | -0.8 | 0.00 |
| Q8N6C8 | Leukocyte immunoglobulin-like receptor subfamily A member 3<br>OS=Homo sapiens<br>GN=LILRA3<br>PE=1 SV=3 - [LIRA3_HUMAN]      | -0.28 | -0.39 | -0.29 | -0.36 | -1.23 | -1.14 | -1.27 | -1.18 | -0.8 | 0.00 |
| Q6P2E9 | Enhancer of mRNA-decapping protein 4<br>OS=Homo sapiens<br>GN=EDC4<br>PE=1 SV=1 - [EDC4_HUMAN]                                | -1.00 | -0.81 | -1.04 | -0.85 | -1.08 | -0.10 | -1.12 | -0.14 | -0.8 | 0.00 |
| Q13263 | Transcription intermediary factor 1-beta<br>OS=Homo sapiens<br>GN=TRIM28<br>PE=1 SV=5 - [TIF1B_HUMAN]                         | -0.77 | -0.92 | -0.60 | -0.93 |       |       |       |       | -0.8 | 0.00 |
| P04406 | Glyceraldehyde-3-phosphate dehydrogenase<br>OS=Homo sapiens<br>GN=GAPDH<br>PE=1 SV=3 - [G3P_HUMAN]                            | -1.21 | -1.21 | -1.15 | -1.20 | -0.53 | -0.38 | -0.48 | -0.35 | -0.8 | 0.00 |

|        |                                                                                                           |       |       |       |       |       |       |       |       |      |      |
|--------|-----------------------------------------------------------------------------------------------------------|-------|-------|-------|-------|-------|-------|-------|-------|------|------|
| Q9HCX3 | Zinc finger protein 304<br>OS=Homo sapiens<br>GN=ZNF304<br>PE=2 SV=2 - [ZN304_HUMAN]                      |       |       |       |       | -0.43 | -1.32 | -0.31 | -1.21 | -0.8 | 0.05 |
| Q9P273 | Teneurin-3<br>OS=Homo sapiens<br>GN=ODZ3<br>PE=2 SV=3 - [TEN3_HUMAN]                                      |       |       |       |       | -0.32 | -1.09 | -0.80 | -1.23 | -0.9 | 0.02 |
| Q8NI35 | InaD-like protein<br>OS=Homo sapiens<br>GN=INADL<br>PE=1 SV=3 - [INADL_HUMAN]                             | -0.60 | -0.56 | -0.63 | -0.59 | -1.12 | -1.20 | -1.09 | -1.17 | -0.9 | 0.00 |
| O75691 | Small subunit processome component 20 homolog<br>OS=Homo sapiens<br>GN=UTP20<br>PE=1 SV=3 - [UTP20_HUMAN] | -0.79 | -1.10 | -0.66 | -0.97 |       |       |       |       | -0.9 | 0.00 |
| Q7Z3V4 | Ubiquitin-protein ligase E3B<br>OS=Homo sapiens<br>GN=UBE3B<br>PE=1 SV=3 - [UBE3B_HUMAN]                  | -0.39 | -0.55 | -1.71 | -1.85 | -0.67 | -0.49 | -0.79 | -0.61 | -0.9 | 0.00 |
| Q6ZN57 | Zinc finger protein 2 homolog<br>OS=Homo sapiens<br>GN=ZFP2<br>PE=2 SV=1 - [ZFP2_HUMAN]                   | -0.52 | -0.86 | -0.93 | -1.26 |       |       |       |       | -0.9 | 0.01 |
| Q86XP0 | Cytosolic phospholipase A2 delta<br>OS=Homo sapiens<br>GN=PLA2G4D<br>PE=2 SV=2 - [PA24D_HUMAN]            |       | -0.88 |       | -0.45 | -0.20 | -1.53 | -0.51 | -1.84 | -0.9 | 0.02 |

|        |                                                                                                           |       |       |       |       |       |       |       |       |      |      |
|--------|-----------------------------------------------------------------------------------------------------------|-------|-------|-------|-------|-------|-------|-------|-------|------|------|
| Q9BYE9 | Cadherin-related family member 2<br>OS=Homo sapiens<br>GN=CDHR2<br>PE=1 SV=2 - [CDHR2_HUMAN]              | -0.86 | -0.92 | -0.90 | -0.95 |       |       |       |       | -0.9 | 0.00 |
| Q13576 | Ras GTPase-activating-like protein<br>IQGAP2<br>OS=Homo sapiens<br>GN=IQGAP2<br>PE=1 SV=4 - [IQGA2_HUMAN] | -1.35 | -1.37 | -0.98 | -1.00 | -1.11 | -1.32 | 0.07  | -0.37 | -0.9 | 0.00 |
| P46013 | Antigen KI-67<br>OS=Homo sapiens<br>GN=MKI67<br>PE=1 SV=2 - [KI67_HUMAN]                                  | -2.20 | -1.78 | -1.72 | -1.38 | -0.28 | -0.49 | 0.32  | 0.10  | -0.9 | 0.03 |
| Q8N587 | Zinc finger protein 561<br>OS=Homo sapiens<br>GN=ZNF561<br>PE=2 SV=2 - [ZN561_HUMAN]                      |       |       |       |       | -1.57 | -1.36 | -0.57 | -0.36 | -1.0 | 0.05 |
| Q02108 | Guanylate cyclase soluble subunit alpha-3<br>OS=Homo sapiens<br>GN=GUCY1A3<br>PE=1 SV=2 - [GCYA3_HUMAN]   | -1.75 | -1.66 | -1.57 | -1.47 | -0.38 | -0.43 | -0.22 | -0.27 | -1.0 | 0.01 |
| P24844 | Myosin regulatory light polypeptide 9<br>OS=Homo sapiens<br>GN=MYL9<br>PE=1 SV=4 - [MYL9_HUMAN]           | -1.35 | -1.09 | -0.65 | -0.64 | -1.20 | -1.25 | -1.05 | -0.92 | -1.0 | 0.00 |

|        |                                                                                                                |       |       |       |       |       |       |       |       |      |      |
|--------|----------------------------------------------------------------------------------------------------------------|-------|-------|-------|-------|-------|-------|-------|-------|------|------|
| P06730 | Eukaryotic translation initiation factor 4E<br>OS=Homo sapiens<br>GN=EIF4E<br>PE=1 SV=2 - [EIF4E_HUMAN]        |       |       |       |       | -1.01 | -0.92 | -1.12 | -1.03 | -1.0 | 0.00 |
| Q96JA4 | Membrane-spanning 4-domains subfamily A member 14<br>OS=Homo sapiens<br>GN=MS4A14<br>PE=2 SV=2 - [M4A14_HUMAN] | -1.13 | -1.62 | -0.67 | -1.14 | -0.67 | -1.20 | -0.70 | -1.23 | -1.0 | 0.00 |
| P02538 | Keratin, type II cytoskeletal 6A<br>OS=Homo sapiens<br>GN=KRT6A<br>PE=1 SV=3 - [K2C6A_HUMAN]                   | -0.54 | -1.00 | -1.09 | -1.56 |       |       |       |       | -1.0 | 0.02 |
| Q02156 | Protein kinase C epsilon type<br>OS=Homo sapiens<br>GN=PRKCE<br>PE=1 SV=1 - [KPCE_HUMAN]                       |       |       |       |       | -1.08 |       | -1.04 |       | -1.1 | 0.01 |
| Q6ZVD7 | Storkhead-box protein 1<br>OS=Homo sapiens<br>GN=STOX1<br>PE=1 SV=2 - [STOX1_HUMAN]                            | -1.64 | -1.62 | -0.79 | -0.77 | -0.66 | -2.00 | 0.16  | -1.18 | -1.1 | 0.00 |
| Q9H9C1 | Spermatogenesis-defective protein 39 homolog<br>OS=Homo sapiens<br>GN=SPE39<br>PE=1 SV=1 - [SPE39_HUMAN]       | -0.85 | -0.60 | -0.75 | -0.50 | -1.96 | -2.67 | -0.25 | -0.97 | -1.1 | 0.01 |

|        |                                                                                                               |       |       |       |       |       |       |       |       |      |      |
|--------|---------------------------------------------------------------------------------------------------------------|-------|-------|-------|-------|-------|-------|-------|-------|------|------|
| Q96QB1 | Rho GTPase-activating protein 7<br>OS=Homo sapiens<br>GN=DLC1<br>PE=1 SV=4 - [RHG07_HUMAN]                    | -0.37 | -0.82 | -1.12 | -1.97 |       |       |       |       | -1.1 | 0.05 |
| Q96AX9 | E3 ubiquitin-protein ligase MIB2<br>OS=Homo sapiens<br>GN=MIB2<br>PE=1 SV=3 - [MIB2_HUMAN]                    |       |       |       |       | -1.40 | -1.68 | -0.48 | -0.76 | -1.1 | 0.03 |
| Q86YA3 | Uncharacterized protein C4orf21<br>OS=Homo sapiens<br>GN=C4orf21<br>PE=1 SV=2 - [CD021_HUMAN]                 | -0.21 | -0.95 | -0.24 | -0.97 | -1.67 | -1.44 | -1.72 | -1.49 | -1.1 | 0.00 |
| P60660 | Myosin light polypeptide 6<br>OS=Homo sapiens<br>GN=MYL6<br>PE=1 SV=2 - [MYL6_HUMAN]                          | -0.90 | -1.02 | -0.98 | -1.10 | -1.17 | -1.31 | -1.07 | -1.19 | -1.1 | 0.00 |
| Q03112 | MDS1 and EVI1 complex locus protein EVI1<br>OS=Homo sapiens<br>GN=MECOM<br>PE=1 SV=2 - [EVI1_HUMAN]           | -1.41 | -2.23 | -1.31 | -1.75 | -0.27 | -0.53 | -0.51 | -0.77 | -1.1 | 0.00 |
| P62158 | Calmodulin<br>OS=Homo sapiens<br>GN=CALM1<br>PE=1 SV=2 - [CALM_HUMAN]                                         | -0.81 | -1.03 | -0.81 | -1.01 | -1.93 | -0.81 | -1.76 | -0.64 | -1.1 | 0.00 |
| Q13702 | 43 kDa receptor-associated protein of the synapse<br>OS=Homo sapiens<br>GN=RAPSN<br>PE=1 SV=4 - [RAPSN_HUMAN] | -2.34 | -2.74 | -1.49 | -1.88 | -0.46 | 0.25  | -0.43 | 0.28  | -1.1 | 0.03 |

|        |                                                                                                                   |       |       |       |       |       |       |       |       |      |      |
|--------|-------------------------------------------------------------------------------------------------------------------|-------|-------|-------|-------|-------|-------|-------|-------|------|------|
| Q86VH5 | Leucine-rich repeat transmembrane neuronal protein 3<br>OS=Homo sapiens<br>GN=LRRTM3<br>PE=2 SV=2 - [LRRT3_HUMAN] | -1.03 | -0.92 | -1.29 | -1.18 |       |       |       |       | -1.1 | 0.00 |
| P78312 | Protein FAM193A<br>OS=Homo sapiens<br>GN=FAM193A<br>PE=1 SV=2 - [F193A_HUMAN]                                     | -1.23 | -1.46 | -0.91 | -0.83 |       |       |       |       | -1.1 | 0.00 |
| Q8N5H7 | SH2 domain-containing protein 3C<br>OS=Homo sapiens<br>GN=SH2D3C<br>PE=1 SV=1 - [SH2D3_HUMAN]                     | -0.84 | -1.21 | -1.04 | -1.41 |       |       |       |       | -1.1 | 0.00 |
| Q5T7B8 | Kinesin-like protein KIF24<br>OS=Homo sapiens<br>GN=KIF24<br>PE=1 SV=2 - [KIF24_HUMAN]                            |       |       |       |       | -0.44 | -1.63 | -0.65 | -1.84 | -1.1 | 0.05 |
| Q6WKZ4 | Rab11 family-interacting protein 1<br>OS=Homo sapiens<br>GN=RAB11FIP1<br>PE=1 SV=2 - [RFIP1_HUMAN]                | -1.42 | -1.50 | -0.78 | -0.86 |       |       |       |       | -1.1 | 0.01 |
| P52630 | Signal transducer and activator of transcription 2<br>OS=Homo sapiens<br>GN=STAT2<br>PE=1 SV=1 - [STAT2_HUMAN]    | -0.82 | -1.57 | -0.97 | -1.22 |       |       |       |       | -1.1 | 0.01 |



|        |                                                                                                               |       |       |       |       |       |       |       |       |      |      |
|--------|---------------------------------------------------------------------------------------------------------------|-------|-------|-------|-------|-------|-------|-------|-------|------|------|
| O60245 | Protocadherin-7<br>OS=Homo sapiens<br>GN=PCDH7<br>PE=1 SV=2 - [PCDH7_HUMAN]                                   | -0.63 | -1.78 | -0.53 | -1.67 |       |       |       |       | -1.2 | 0.04 |
| Q96RP7 | Galactose-3-O-sulfotransferase 4<br>OS=Homo sapiens<br>GN=GAL3ST4<br>PE=1 SV=1 - [G3ST4_HUMAN]                | -0.77 | -2.57 | -0.65 | -2.44 | -0.82 | -0.24 | -1.27 | -0.70 | -1.2 | 0.01 |
| Q5R3F8 | Protein phosphatase 1 regulatory subunit 29<br>OS=Homo sapiens<br>GN=ELFN2<br>PE=1 SV=1 - [PPR29_HUMAN]       | -0.98 | -0.93 | -1.06 | -1.02 |       |       | -2.95 | -0.25 | -1.2 | 0.02 |
| Q9Y2T1 | Axin-2<br>OS=Homo sapiens<br>GN=AXIN2<br>PE=1 SV=1 - [AXIN2_HUMAN]                                            | -1.47 | -1.60 | -0.80 | -0.93 |       |       |       |       | -1.2 | 0.01 |
| Q12802 | A-kinase anchor protein 13<br>OS=Homo sapiens<br>GN=AKAP13<br>PE=1 SV=2 - [AKP13_HUMAN]                       | -2.25 | -3.08 | -1.87 | -2.78 | 0.17  | -0.24 | 0.31  | 0.03  | -1.2 | 0.05 |
| Q76NI1 | Protein very KIND<br>OS=Homo sapiens<br>GN=KNDC1<br>PE=2 SV=2 - [VKIND_HUMAN]                                 | -0.21 | -0.49 | 0.08  | -0.18 | -2.94 | -3.05 | -1.42 | -1.52 | -1.2 | 0.03 |
| Q86W24 | NACHT, LRR and PYD domains-containing protein 14<br>OS=Homo sapiens<br>GN=NLRP14<br>PE=2 SV=1 - [NAL14_HUMAN] | -0.46 | -0.34 | -0.34 | -0.21 | -3.78 | -3.23 | -0.72 | -0.75 | -1.2 | 0.04 |

|        |                                                                                                               |       |       |       |       |       |       |       |       |      |      |
|--------|---------------------------------------------------------------------------------------------------------------|-------|-------|-------|-------|-------|-------|-------|-------|------|------|
| A6NHN0 | Otolin-1<br>OS=Homo sapiens<br>GN=OTOL1<br>PE=3 SV=1 -<br>[OTOL1_HUMAN]                                       | -2.20 | -2.34 | -2.25 | -2.37 | -0.21 | -0.13 | -0.24 | -0.17 | -1.2 | 0.02 |
| Q9Y4B5 | Coiled-coil domain-containing protein 165<br>OS=Homo sapiens<br>GN=CCDC165<br>PE=1 SV=5 -<br>[CC165_HUMAN]    | -0.95 | -0.66 | -2.25 | -1.96 | -1.16 | -1.13 | -1.12 | -1.09 | -1.3 | 0.00 |
| Q9C011 | Myotubularin-related protein 12<br>OS=Homo sapiens<br>GN=MTMR1<br>PE=1 SV=2 -<br>[MTMRC_HUMAN]                | -0.30 | -0.24 | -0.41 | -0.33 | -2.43 | -2.36 | -2.26 | -2.18 | -1.3 | 0.01 |
| P00352 | Retinal dehydrogenase 1<br>OS=Homo sapiens<br>GN=ALDH1A1<br>PE=1 SV=2 -<br>[AL1A1_HUMAN]                      | -1.52 | -1.26 | -1.43 | -1.15 |       |       |       |       | -1.3 | 0.00 |
| P02679 | Fibrinogen gamma chain<br>OS=Homo sapiens<br>GN=FGG<br>PE=1 SV=3 -<br>[FIBG_HUMAN]                            | -0.67 | -0.81 | -0.64 | -0.82 | -1.92 | -1.86 | -2.11 | -2.03 | -1.4 | 0.00 |
| P78527 | DNA-dependent protein kinase catalytic subunit<br>OS=Homo sapiens<br>GN=PRKDC<br>PE=1 SV=3 -<br>[PRKDC_HUMAN] |       |       |       |       | -1.37 | -1.20 | -1.72 | -1.54 | -1.5 | 0.00 |

|        |                                                                                                     |       |       |       |       |       |       |       |       |      |      |
|--------|-----------------------------------------------------------------------------------------------------|-------|-------|-------|-------|-------|-------|-------|-------|------|------|
| O75310 | UDP-glucuronosyltransferase 2B11<br>OS=Homo sapiens<br>GN=UGT2B11<br>PE=2 SV=1<br>-[UDB11_HUMAN]    | -0.40 | -0.16 | -0.21 | 0.02  | -2.79 | -2.73 | -2.81 | -2.74 | -1.5 | 0.02 |
| O75897 | Sulfotransferase 1C4<br>OS=Homo sapiens<br>GN=SULT1C4<br>PE=1 SV=2<br>-[ST1C4_HUMAN]                | -1.87 | -1.92 | -1.61 | -1.64 | -0.93 | -1.48 | -0.91 | -1.46 | -1.5 | 0.00 |
| O43196 | MutS protein homolog 5<br>OS=Homo sapiens<br>GN=MSH5<br>PE=1 SV=1<br>-[MSH5_HUMAN]                  |       |       |       |       | -1.72 | -2.35 | -0.69 | -1.31 | -1.5 | 0.02 |
| Q6WRI0 | Immunoglobulin superfamily member 10<br>OS=Homo sapiens<br>GN=IGSF10<br>PE=1 SV=1<br>-[IGS10_HUMAN] | -1.73 | -1.61 | -1.51 | -1.38 |       |       |       |       | -1.6 | 0.00 |
| P02675 | Fibrinogen beta chain<br>OS=Homo sapiens<br>GN=FGB<br>PE=1 SV=2<br>-[FIBB_HUMAN]                    | -1.65 | -1.75 | -1.72 | -1.90 | -1.65 | -1.48 | -1.56 | -1.41 | -1.6 | 0.00 |
| P05141 | ADP/ATP translocase 2<br>OS=Homo sapiens<br>GN=SLC25A5<br>PE=1 SV=7<br>-[ADT2_HUMAN]                | -1.82 | -1.55 | -1.78 | -1.51 |       |       |       |       | -1.7 | 0.00 |
| P56377 | AP-1 complex subunit sigma 2<br>OS=Homo sapiens<br>GN=AP1S2<br>PE=1 SV=1<br>-[AP1S2_HUMAN]          |       |       |       |       | -1.60 | -1.42 | -1.97 | -1.79 | -1.7 | 0.00 |

|        |                                                                                                                         |       |       |       |       |       |       |       |       |      |      |
|--------|-------------------------------------------------------------------------------------------------------------------------|-------|-------|-------|-------|-------|-------|-------|-------|------|------|
| Q05086 | Ubiquitin-protein ligase E3A<br>OS=Homo sapiens<br>GN=UBE3A<br>PE=1 SV=4 - [UBE3A_HUMAN]                                | -0.49 | -1.20 | -0.24 | -0.93 | -3.21 | -3.05 | -3.06 | -2.91 | -1.9 | 0.00 |
| Q9H8Y5 | Ankyrin repeat and zinc finger domain-containing protein 1<br>OS=Homo sapiens<br>GN=ANKZF1<br>PE=1 SV=1 - [ANKZ1_HUMAN] | -2.29 | -2.13 | -1.88 | -1.72 |       |       |       |       | -2.0 | 0.00 |
| Q9C0J8 | pre-mRNA 3' end processing protein WDR33<br>OS=Homo sapiens<br>GN=WDR33<br>PE=1 SV=2 - [WDR33_HUMAN]                    |       |       |       |       | -2.31 | -1.91 | -2.13 | -1.72 | -2.0 | 0.00 |
| Q9UNU6 | 7-alpha-hydroxycholesterol-4-en-3-one 12-alpha-hydroxylase<br>OS=Homo sapiens<br>GN=CYP8B1<br>PE=2 SV=2 - [CP8B1_HUMAN] | -3.64 | -3.60 | -4.09 | -4.05 | -0.23 | -0.34 | -0.06 | -0.17 | -2.0 | 0.02 |
| Q15399 | Toll-like receptor 1<br>OS=Homo sapiens<br>GN=TLR1<br>PE=1 SV=3 - [TLR1_HUMAN]                                          | -2.07 | -2.18 | -1.88 | -1.97 |       |       |       |       | -2.0 | 0.00 |
| Q9UL63 | Muskelin<br>OS=Homo sapiens<br>GN=MKLN1<br>PE=1 SV=2 - [MKLN1_HUMAN]                                                    | -2.02 | -2.07 | -2.09 | -2.14 |       |       |       |       | -2.1 | 0.00 |

|        |                                                                                                             |       |       |       |       |       |       |       |       |      |      |
|--------|-------------------------------------------------------------------------------------------------------------|-------|-------|-------|-------|-------|-------|-------|-------|------|------|
| A6NJZ7 | RIMS-binding protein 3C<br>OS=Homo sapiens<br>GN=RIMBP3<br>C PE=1<br>SV=3 - [RIM3C_HUMAN]                   |       |       |       | -1.41 | -2.96 | -3.38 | -1.40 | -1.82 | -2.2 | 0.01 |
| Q14679 | Tubulin polyglutamylase TTL4<br>OS=Homo sapiens<br>GN=TTL4<br>PE=1 SV=2 - [TTL4_HUMAN]                      | -3.27 | -4.36 | -2.07 | -3.15 | -2.70 | -0.07 | -2.47 | 0.16  | -2.2 | 0.00 |
| Q9Y5H1 | Protocadherin gamma-A2<br>OS=Homo sapiens<br>GN=PCDHGA2<br>PE=2<br>SV=1 - [PCDG2_HUMAN]                     | -3.39 | -3.84 | -1.80 | -2.24 | -3.86 | -3.16 | -0.22 | 0.48  | -2.3 | 0.01 |
| P29350 | Tyrosine-protein phosphatase non-receptor type 6<br>OS=Homo sapiens<br>GN=PTPN6<br>PE=1 SV=1 - [PTN6_HUMAN] | -5.21 | -5.70 | -4.10 | -4.58 | 0.03  | 0.14  | 0.15  | 0.24  | -2.4 | 0.04 |
| Q13591 | Semaphorin-5A<br>OS=Homo sapiens<br>GN=SEMA5A<br>PE=1 SV=3 - [SEM5A_HUMAN]                                  |       |       |       |       | -3.71 | -4.56 | -1.25 | -1.35 | -2.7 | 0.05 |
| Q5KSL6 | Diacylglycerol kinase kappa<br>OS=Homo sapiens<br>GN=DGKK<br>PE=1 SV=1 - [DGKK_HUMAN]                       | -2.67 | -3.74 | -2.77 | -3.84 |       |       |       |       | -3.3 | 0.00 |
