# Supplementary material for: Increased circulating resistin levels in early-onset breast cancer patients of normal body mass index correlate with lymph node negative involvement and longer disease free survival: a multi-center POSH cohort serum proteomics study
Source: Springer Nature journal article supplement (doi:10.1186/s13058-018-0938-6), 2018-03-22
Supplement: MOESM5 [file 15557162]

Supplementary Section 5. ELISA measurements of resistin

Plate 1 (1:25 dilution)

| Outcome group | Sample ID | RESISTIN c (ng/mL) | RESISTIN LOG10(c) | OD450  | interpolated data | transform c (1:25) | c (ng/mL) |
|---------------|-----------|--------------------|-------------------|--------|-------------------|--------------------|-----------|
|               | Standard  | 10.00              | 1.00              | 0.8292 |                   |                    |           |
|               | Standard  | 10.00              | 1.00              | 0.7675 |                   |                    |           |
|               | Standard  | 5.00               | 0.70              | 0.4299 |                   |                    |           |
|               | Standard  | 5.00               | 0.70              | 0.5702 |                   |                    |           |
|               | Standard  | 2.50               | 0.40              | 0.1552 |                   |                    |           |
|               | Standard  | 2.50               | 0.40              | 0.2017 |                   |                    |           |
|               | Standard  | 1.25               | 0.10              | 0.0804 |                   |                    |           |
|               | Standard  | 1.25               | 0.10              | 0.1033 |                   |                    |           |
|               | Standard  | 0.63               | -0.20             | 0.0453 |                   |                    |           |
|               | Standard  | 0.63               | -0.20             | 0.0231 |                   |                    |           |
|               | Standard  | 0.31               | -0.51             | 0.0231 |                   |                    |           |
|               | Standard  | 0.31               | -0.51             | 0.0429 |                   |                    |           |
|               | Standard  | 0.16               | -0.81             | 0.0122 |                   |                    |           |
|               | Standard  | 0.16               | -0.81             | 0.0219 |                   |                    |           |
| Poor          | 65        |                    |                   | 0.1322 | 0.2945            | 1.97               | 49.25     |
| Good          | 85        |                    |                   | 0.1284 | 0.2864            | 1.93               | 48.34     |
| Good          | 42        |                    |                   | 0.1300 | 0.2899            | 1.95               | 48.74     |
| Good          | 9         |                    |                   | 0.1322 | 0.2946            | 1.97               | 49.26     |
| Poor          | 60        |                    |                   | 0.0847 | 0.1642            | 1.46               | 36.49     |
| Poor          | 74        |                    |                   | 0.0681 | 0.0919            | 1.24               | 30.89     |
| Poor          | 7         |                    |                   | 0.1347 | 0.2997            | 1.99               | 49.85     |
| Good          | 65        |                    |                   | 0.1581 | 0.3442            | 2.21               | 55.23     |
| Poor          | 49        |                    |                   | 0.1257 | 0.2804            | 1.91               | 47.68     |
| Good          | 25        |                    |                   | 0.1410 | 0.3125            | 2.05               | 51.33     |
| Good          | 61        |                    |                   | 0.3712 | 0.5933            | 3.92               | 98.01     |
| Good          | 39        |                    |                   | 0.1492 | 0.3282            | 2.13               | 53.23     |
| Good          | 45        |                    |                   | 0.0914 | 0.1877            | 1.54               | 38.52     |
| Good          | 47        |                    |                   | 0.1624 | 0.3516            | 2.25               | 56.18     |
| Good          | 48        |                    |                   | 0.4083 | 0.6259            | 4.23               | 105.65    |
| Poor          | 38        |                    |                   | 0.3592 | 0.5825            | 3.82               | 95.59     |
| Poor          | 86        |                    |                   | 0.3369 | 0.5619            | 3.65               | 91.17     |
| Good          | 49        |                    |                   | 0.3560 | 0.5795            | 3.80               | 94.95     |
| Poor          | 63        |                    |                   | 0.1507 | 0.3309            | 2.14               | 53.55     |
| Good          | 14        |                    |                   | 0.0528 | -0.0064           | 0.99               | 24.63     |
| Good          | 38        |                    |                   | 0.1155 | 0.2565            | 1.80               | 45.12     |
| Good          | 73        |                    |                   | 0.2994 | 0.5253            | 3.35               | 83.79     |
| Good          | 83        |                    |                   | 0.1095 | 0.2412            | 1.74               | 43.56     |
| Good          | 88        |                    |                   | 0.2626 | 0.4864            | 3.06               | 76.62     |
| Poor          | 8         |                    |                   | 0.2004 | 0.4097            | 2.57               | 64.21     |
| Good          | 3         |                    |                   | 0.1026 | 0.2221            | 1.67               | 41.69     |
| Poor          | 2         |                    |                   | 0.1907 | 0.3959            | 2.49               | 62.20     |

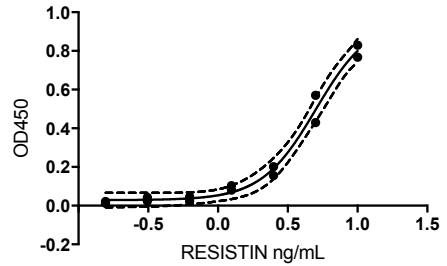

|      |    |        |         |      |       |
|------|----|--------|---------|------|-------|
| Good | 15 | 0.0380 | -0.1957 | 0.64 | 15.93 |
| Good | 5  | 0.2440 | 0.4652  | 2.92 | 72.97 |
| Good | 77 | 0.2145 | 0.4286  | 2.68 | 67.08 |
| Poor | 79 | 0.2568 | 0.4799  | 3.02 | 75.47 |
| Poor | 16 | 0.0982 | 0.2091  | 1.62 | 40.47 |
| Good | 50 | 0.1782 | 0.3772  | 2.38 | 59.59 |
| Poor | 56 | 0.1728 | 0.3687  | 2.34 | 58.43 |
| Poor | 24 | 0.2969 | 0.5227  | 3.33 | 83.31 |
| Good | 26 | 0.2373 | 0.4572  | 2.87 | 71.64 |
| Poor | 71 | 0.0920 | 0.1895  | 1.55 | 38.68 |
| Poor | 28 | 0.1730 | 0.3691  | 2.34 | 58.48 |
| Poor | 40 | 0.2841 | 0.5096  | 3.23 | 80.82 |
| Poor | 90 | 0.0935 | 0.1946  | 1.57 | 39.13 |
| Poor | 13 | 0.2968 | 0.5227  | 3.33 | 83.29 |

Plate 2 (1:25 dilution)

| Outcome group | Sample ID | RESISTIN ng/mL | RESISTIN LOG10(c) | OD450  | interpolated data | transform c (1:25) | c (ng/mL) |
|---------------|-----------|----------------|-------------------|--------|-------------------|--------------------|-----------|
|               | Standard  | 10             | 1.00              | 0.6690 |                   |                    |           |
|               | Standard  | 10             | 1.00              | 0.6730 |                   |                    |           |
|               | Standard  | 5              | 0.70              | 0.4732 |                   |                    |           |
|               | Standard  | 5              | 0.70              | 0.4600 |                   |                    |           |
|               | Standard  | 2.5            | 0.40              | 0.1608 |                   |                    |           |
|               | Standard  | 2.5            | 0.40              | 0.2232 |                   |                    |           |
|               | Standard  | 1.25           | 0.10              | 0.0848 |                   |                    |           |
|               | Standard  | 1.25           | 0.10              | 0.0871 |                   |                    |           |
|               | Standard  | 0.625          | -0.20             | 0.0364 |                   |                    |           |
|               | Standard  | 0.625          | -0.20             | 0.0413 |                   |                    |           |
|               | Standard  | 0.312          | -0.51             | 0.0061 |                   |                    |           |
|               | Standard  | 0.312          | -0.51             | 0.0291 |                   |                    |           |
|               | Standard  | 0.156          | -0.81             | 0.0004 |                   |                    |           |
|               | Standard  | 0.156          | -0.81             | 0.0124 |                   |                    |           |
| Poor          | 21        |                |                   | 0.0336 | -0.1643           | 0.69               | 17.1      |
| Poor          | 81        |                |                   | 0.0770 | 0.1154            | 1.30               | 32.6      |
| Good          | 6         |                |                   | 0.1016 | 0.1950            | 1.57               | 39.2      |
| Poor          | 82        |                |                   | 0.0536 | 0.0050            | 1.01               | 25.3      |
| Good          | 79        |                |                   | 0.1776 | 0.3547            | 2.26               | 56.6      |
| Poor          | 53        |                |                   | 0.1710 | 0.3436            | 2.21               | 55.2      |
| Poor          | 51        |                |                   | 0.0598 | 0.0396            | 1.10               | 27.4      |
| Poor          | 18        |                |                   | 0.0610 | 0.0456            | 1.11               | 27.8      |
| Poor          | 57        |                |                   | 0.0597 | 0.0389            | 1.09               | 27.3      |
| Poor          | 87        |                |                   | 0.2453 | 0.4536            | 2.84               | 71.0      |
| Poor          | 45        |                |                   | 0.0646 | 0.0634            | 1.16               | 28.9      |
| Good          | 56        |                |                   | 0.2952 | 0.5156            | 3.28               | 81.95     |
| Poor          | 29        |                |                   | 0.1059 | 0.2068            | 1.61               | 40.2      |

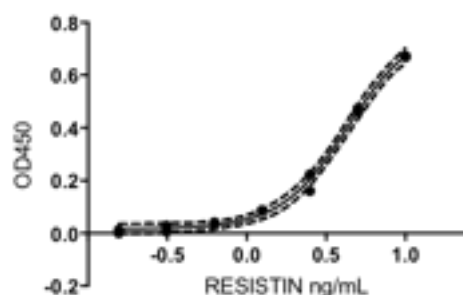

|      |    |        |         |       |       |
|------|----|--------|---------|-------|-------|
| Good | 31 | 0.1017 | 0.1953  | 1.57  | 39.2  |
| Poor | 84 | 0.1148 | 0.2295  | 1.70  | 42.4  |
| Good | 75 | 0.1061 | 0.2072  | 1.61  | 40.3  |
| Poor | 54 | 0.0288 | -0.2354 | 0.58  | 14.5  |
| Good | 66 | 0.0648 | 0.0640  | 1.16  | 29.0  |
| Poor | 39 | 0.3393 | 0.5664  | 3.68  | 92.1  |
| Good | 32 | 0.1623 | 0.3284  | 2.13  | 53.25 |
| Poor | 64 | 0.0581 | 0.0309  | 1.07  | 26.8  |
| Poor | 5  | 0.3302 | 0.5561  | 3.60  | 90.0  |
| Good | 60 | 0.3060 | 0.5283  | 3.38  | 84.4  |
| Good | 37 | 0.1589 | 0.3223  | 2.10  | 52.5  |
| Good | 69 | 0.1361 | 0.2779  | 1.90  | 47.4  |
| Poor | 58 | 0.0548 | 0.0121  | 1.03  | 25.7  |
| Poor | 47 | 0.2435 | 0.4513  | 2.83  | 70.7  |
| Good | 40 | 0.1447 | 0.2953  | 1.97  | 49.35 |
| Poor | 32 | 0.1165 | 0.2337  | 1.71  | 42.8  |
| Poor | 41 | 0.2228 | 0.4231  | 2.65  | 66.2  |
| Poor | 70 | 0.0753 | 0.1090  | 1.29  | 32.1  |
| Poor | 62 | 0.1458 | 0.2975  | 1.98  | 49.6  |
| Poor | 91 | 0.3035 | 0.5254  | 3.35  | 83.8  |
| Poor | 67 | 0.1781 | 0.3555  | 2.27  | 56.7  |
| Poor | 23 | 0.1310 | 0.2670  | 1.85  | 46.2  |
| Poor | 44 | 0.1591 | 0.3226  | 2.10  | 52.5  |
| Poor | 78 | 0.1702 | 0.3423  | 2.20  | 55.0  |
| Good | 68 | 0.1087 | 0.2140  | 1.64  | 40.9  |
| Good | 27 | 0.1281 | 0.2605  | 1.82  | 45.6  |
| Poor | 20 | 0.1132 | 0.2257  | 1.68  | 42.0  |
| Poor | 88 | 0.1712 | 0.3439  | 2.21  | 55.2  |
| Poor | 30 | 0.4267 | 0.6625  | 4.60  | 114.9 |
| Good | 90 | 0.1799 | 0.3585  | 2.28  | 57.1  |
| Poor | 12 | 0.1717 | 0.3448  | 2.21  | 55.3  |
| Poor | 75 | 0.2405 | 0.4473  | 2.80  | 70.0  |
| Good | 16 | 0.2394 | 0.4458  | 2.79  | 69.8  |
| Good | 51 | 0.1541 | 0.3135  | 2.06  | 51.5  |
| Poor | 66 | 0.0540 | 0.0075  | 1.02  | 25.4  |
| Good | 70 | 0.0683 | 0.0798  | 1.20  | 30.05 |
| Poor | 14 | 0.2672 | 0.4816  | 3.03  | 75.8  |
| Good | 43 | 0.6961 | 1.0527  | 11.29 | 282.3 |
| Poor | 36 | 0.2869 | 0.5057  | 3.20  | 80.1  |
| Poor | 59 | 0.1319 | 0.2690  | 1.86  | 46.4  |
| Poor | 6  | 0.0330 | -0.1717 | 0.67  | 16.8  |
| Poor | 48 | 0.1839 | 0.3651  | 2.32  | 57.9  |
| Poor | 27 | 0.2692 | 0.4840  | 3.05  | 76.2  |
| Good | 13 | 0.0861 | 0.1476  | 1.40  | 35.1  |
| Poor | 26 | 0.4318 | 0.6681  | 4.66  | 116.4 |
| Good | 17 | 0.1153 | 0.2308  | 1.70  | 42.5  |

|      |    |        |        |      |       |
|------|----|--------|--------|------|-------|
| Good | 59 | 0.1461 | 0.2980 | 1.99 | 49.7  |
| Poor | 22 | 0.2143 | 0.4112 | 2.58 | 64.4  |
| Poor | 50 | 0.5765 | 0.8401 | 6.92 | 173.0 |
| Good | 35 | 0.1337 | 0.2727 | 1.87 | 46.8  |
| Good | 82 | 0.1229 | 0.2489 | 1.77 | 44.35 |
| Poor | 15 | 0.1038 | 0.2012 | 1.59 | 39.7  |
| Poor | 1  | 0.1002 | 0.1911 | 1.55 | 38.8  |
| Good | 89 | 0.0862 | 0.1480 | 1.41 | 35.15 |
| Good | 21 | 0.0735 | 0.1017 | 1.26 | 31.6  |

Plate 3 (1:50 dilution)

| Outcome group | Sample ID | RESISTIN ng/mL | RESISTIN LOG10(c) | OD450  | interpolated data | transform c (1:50) | c (ng/mL) |
|---------------|-----------|----------------|-------------------|--------|-------------------|--------------------|-----------|
|               | Standard  | 10.00          | 1.00              | 0.5577 |                   |                    |           |
|               | Standard  | 10.00          | 1.00              | 0.5907 |                   |                    |           |
|               | Standard  | 5.00           | 0.70              | 0.3197 |                   |                    |           |
|               | Standard  | 5.00           | 0.70              | 0.3407 |                   |                    |           |
|               | Standard  | 2.50           | 0.40              | 0.1207 |                   |                    |           |
|               | Standard  | 2.50           | 0.40              | 0.1507 |                   |                    |           |
|               | Standard  | 1.25           | 0.10              | 0.0367 |                   |                    |           |
|               | Standard  | 1.25           | 0.10              | 0.0577 |                   |                    |           |
|               | Standard  | 0.63           | -0.20             | 0.0207 |                   |                    |           |
|               | Standard  | 0.63           | -0.20             | 0.0247 |                   |                    |           |
|               | Standard  | 0.31           | -0.51             | 0.0057 |                   |                    |           |
|               | Standard  | 0.31           | -0.51             | 0.0127 |                   |                    |           |
|               | Standard  | 0.16           | -0.81             | 0.0047 |                   |                    |           |
|               | Standard  | 0.16           | -0.81             | 0.0127 |                   |                    |           |
| Good          | 46        |                |                   | 0.0957 | 0.2953            | 1.97               | 98.70     |
| Poor          | 85        |                |                   | 0.1597 | 0.4479            | 2.80               | 140.22    |

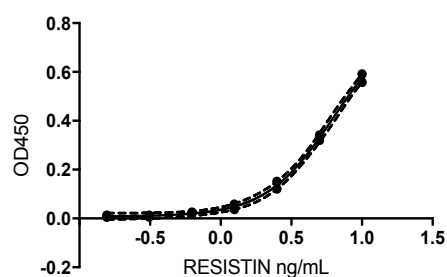

Plate 3 (1:25 dilution)

| Outcome group | Sample ID | RESISTIN ng/mL | RESISTIN ng/mL | OD450  | interpolated data | transform c (1:25) | c (ng/mL) |
|---------------|-----------|----------------|----------------|--------|-------------------|--------------------|-----------|
|               | Standard  | 10.00          | 1.00           | 0.5580 |                   |                    |           |
|               | Standard  | 10.00          | 1.00           | 0.5910 |                   |                    |           |
|               | Standard  | 5.00           | 0.70           | 0.3200 |                   |                    |           |
|               | Standard  | 5.00           | 0.70           | 0.3410 |                   |                    |           |
|               | Standard  | 2.50           | 0.40           | 0.1210 |                   |                    |           |
|               | Standard  | 2.50           | 0.40           | 0.1510 |                   |                    |           |
|               | Standard  | 1.25           | 0.10           | 0.0370 |                   |                    |           |
|               | Standard  | 1.25           | 0.10           | 0.0580 |                   |                    |           |
|               | Standard  | 0.63           | -0.20          | 0.0210 |                   |                    |           |
|               | Standard  | 0.63           | -0.20          | 0.0250 |                   |                    |           |
|               | Standard  | 0.31           | -0.51          | 0.0060 |                   |                    |           |
|               | Standard  | 0.31           | -0.51          | 0.0130 |                   |                    |           |

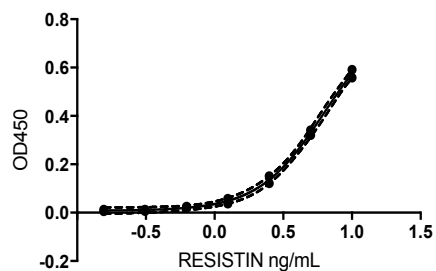

|      | Standard | 0.16 | -0.81 | 0.0050 |         |       |        |
|------|----------|------|-------|--------|---------|-------|--------|
|      | Standard | 0.16 | -0.81 | 0.0130 |         |       |        |
| Good | 54       |      |       | 0.3090 | 0.6722  | 4.70  | 235.1  |
| Poor | 55       |      |       | 0.0700 | 0.2034  | 1.60  | 79.9   |
| Good | 34       |      |       | 0.1420 | 0.4113  | 2.58  | 128.9  |
| Good | 44       |      |       | 0.0830 | 0.2530  | 1.79  | 89.5   |
| Good | 4        |      |       | 0.0470 | 0.0856  | 1.22  | 60.9   |
| Good | 71       |      |       | 0.2320 | 0.5680  | 3.70  | 184.9  |
| Poor | 35       |      |       | 0.2490 | 0.5925  | 3.91  | 195.7  |
| Good | 81       |      |       | 0.0330 | -0.0248 | 0.94  | 47.2   |
| Good | 87       |      |       | 0.1110 | 0.3379  | 2.18  | 108.9  |
| Poor | 17       |      |       | 0.1020 | 0.3131  | 2.06  | 102.8  |
| Good | 63       |      |       | 0.1400 | 0.4071  | 2.55  | 127.7  |
| Poor | 10       |      |       | 0.0860 | 0.2633  | 1.83  | 91.7   |
| Good | 58       |      |       | 0.0950 | 0.2923  | 1.96  | 98.0   |
| Poor | 73       |      |       | 0.0950 | 0.2923  | 1.96  | 98.0   |
| Poor | 19       |      |       | 0.1730 | 0.4722  | 2.97  | 148.3  |
| Good | 11       |      |       | 0.2020 | 0.5218  | 3.33  | 166.3  |
| Good | 36       |      |       | 0.5810 | 1.0092  | 10.21 | 510.7  |
| Poor | 68       |      |       | 0.1680 | 0.4630  | 2.90  | 145.2  |
| Poor | 76       |      |       | 0.3140 | 0.6785  | 4.77  | 238.5  |
| Good | 84       |      |       | 0.2760 | 0.6295  | 4.26  | 213.0  |
| Poor | 9        |      |       | 0.1850 | 0.4934  | 3.11  | 155.7  |
| Good | 10       |      |       | 0.2120 | 0.5377  | 3.45  | 172.5  |
| Good | 57       |      |       | 0.0760 | 0.2273  | 1.69  | 84.4   |
| Good | 74       |      |       | 0.0450 | 0.0724  | 1.18  | 59.1   |
| Poor | 11       |      |       | 0.1950 | 0.5103  | 3.24  | 161.9  |
| Good | 64       |      |       | 0.0880 | 0.2700  | 1.86  | 93.1   |
| Good | 2        |      |       | 0.1470 | 0.4219  | 2.64  | 132.1  |
| Good | 55       |      |       | 0.1850 | 0.4934  | 3.11  | 155.7  |
| Poor | 3        |      |       | 0.3540 | 0.7276  | 5.34  | 267.0  |
| Poor | 61       |      |       | 0.1300 | 0.3848  | 2.43  | 121.3  |
| Good | 19       |      |       | 0.1480 | 0.4239  | 2.65  | 132.7  |
| Poor | 72       |      |       | 0.2220 | 0.5531  | 3.57  | 178.7  |
| Good | 22       |      |       | 0.4830 | 0.8813  | 7.61  | 380.4  |
| Poor | 83       |      |       | 0.2950 | 0.6544  | 4.51  | 225.6  |
| Poor | 43       |      |       | 0.1510 | 0.4301  | 2.69  | 134.6  |
| Good | 24       |      |       | 0.1390 | 0.4049  | 2.54  | 127.0  |
| Poor | 42       |      |       | 0.1070 | 0.3271  | 2.12  | 106.2  |
| Good | 8        |      |       | 0.1000 | 0.3073  | 2.03  | 101.45 |
| Good | 76       |      |       | 0.6330 | 1.0897  | 12.29 | 614.6  |
| Good | 41       |      |       | 0.0350 | -0.0058 | 0.99  | 49.3   |
| Good | 53       |      |       | 0.3440 | 0.7155  | 5.19  | 259.7  |
| Good | 20       |      |       | 0.1100 | 0.3352  | 2.16  | 108.2  |
| Poor | 46       |      |       | 0.1180 | 0.3559  | 2.27  | 113.5  |
| Poor | 89       |      |       | 0.2420 | 0.5826  | 3.82  | 191.2  |

|      |    |        |        |       |        |
|------|----|--------|--------|-------|--------|
| Poor | 25 | 0.1470 | 0.4219 | 2.64  | 132.1  |
| Good | 67 | 0.0460 | 0.0791 | 1.20  | 60.0   |
| Good | 62 | 0.2240 | 0.5561 | 3.60  | 179.9  |
| Good | 86 | 0.1290 | 0.3825 | 2.41  | 120.6  |
| Poor | 37 | 0.1470 | 0.4219 | 2.64  | 132.1  |
| Good | 18 | 0.2270 | 0.5606 | 3.64  | 181.8  |
| Poor | 80 | 0.1530 | 0.4341 | 2.72  | 135.8  |
| Poor | 69 | 0.0960 | 0.2953 | 1.97  | 98.7   |
| Poor | 77 | 0.1940 | 0.5087 | 3.23  | 161.3  |
| Good | 1  | 0.4700 | 0.8655 | 7.34  | 366.9  |
| Good | 52 | 0.0840 | 0.2564 | 1.80  | 90.2   |
| Good | 7  | 0.0700 | 0.2034 | 1.60  | 79.9   |
| Good | 23 | 0.2400 | 0.5797 | 3.80  | 190.0  |
| Good | 80 | 0.0960 | 0.2953 | 1.97  | 98.7   |
| Poor | 33 | 0.2790 | 0.6335 | 4.30  | 215.0  |
| Poor | 31 | 0.0750 | 0.2235 | 1.67  | 83.6   |
| Poor | 4  | 0.3130 | 0.6773 | 4.76  | 237.8  |
| Good | 28 | 0.1750 | 0.4758 | 2.99  | 149.55 |
| Good | 29 | 0.5850 | 1.0150 | 10.35 | 517.5  |
| Poor | 34 | 0.1770 | 0.4794 | 3.02  | 150.8  |
| Good | 33 | 0.5600 | 0.9799 | 9.55  | 477.4  |
| Good | 72 | 0.0730 | 0.2156 | 1.64  | 82.1   |
| Good | 78 | 0.2090 | 0.5330 | 3.41  | 170.6  |
| Poor | 52 | 0.2080 | 0.5314 | 3.40  | 170.0  |
| Good | 30 | 0.2550 | 0.6009 | 3.99  | 199.5  |
